# Supplementary material for: Synthesis of branched-chain sugars and higher-carbon sugars enabled by site-selective C–H alkylation relying on 1,5-hydrogen atom transfer of ethylenoxy radicals
Source: Royal Society of Chemistry journal article supplement (doi:10.1039/d3qo02013d), 2024-01-01
Supplement: d3qo02013d1.pdf [file d3qo02013d1.pdf]

## **Synthesis of branched-chain sugars and higher-carbon sugars enabled by site-selective C–H alkylation relying on 1,5-hydrogen atom transfer of ethylenoxy radicals**

Dongwei Li<sup>a</sup>, Lingjun Wang<sup>a</sup>, Jianjun Wang<sup>a</sup>, Peng Wang<sup>a</sup>, Ni Song<sup>a,b\*</sup>, Pengwei Chen<sup>a\*</sup>, Ming Li<sup>a,b\*</sup>

<sup>a</sup>Molecular Synthesis Center, Key Laboratory of Marine Medicine, Chinese Ministry of Education, School of Medicine and Pharmacy, Ocean University of China, Qingdao, 266003, China.

<sup>b</sup>Laboratory for Marine Drugs and Bioproducts, National Laboratory for Marine Science and Technology, Qingdao, 266237, China.

E-mail: nisong1975@ouc.edu.cn; chenpengwei@itbb.org.cn; lmsnouc@ouc.edu.cn.

## Table of contents

| Contents                                                                                                                                                                                                         | Page number | Spectra of new compounds |           |
|------------------------------------------------------------------------------------------------------------------------------------------------------------------------------------------------------------------|-------------|--------------------------|-----------|
| General information                                                                                                                                                                                              | S1          | –                        |           |
| <b>Table S1</b> Optimization of reaction condition                                                                                                                                                               | S2          |                          |           |
| <b>Table S2</b> Removal of the directing group 2-hydroxyethylene moiety of branched-chain sugars                                                                                                                 | S3          |                          |           |
| <b>Table S3</b> Removal of the directing group 2-hydroxyethylene moiety of higher-carbon sugars                                                                                                                  | S3          |                          |           |
| Stereochemical confirmation of compound <b>S58</b> by Mosher ester analysis                                                                                                                                      | S4          |                          |           |
| Stereochemical confirmation of compound <b>S60</b> by Mosher ester analysis                                                                                                                                      | S5          |                          |           |
| Stereochemical confirmation of compound <b>S61</b> by Mosher ester analysis                                                                                                                                      | S6          |                          |           |
| Stereochemical confirmation of compound <b>S65</b> by Mosher ester analysis                                                                                                                                      | S7          |                          |           |
| <b>Figure S5</b> Comparison of full <sup>1</sup> H NMR spectra for compounds <b>S57, S58, S59, S60, S65, S66, S61, S62, S63, S64, S67, and S68</b>                                                               | S8          |                          |           |
| <b>Figure S6</b> Comparison of expanded <sup>1</sup> H NMR spectra for compounds <b>S57, S58, S59, S60, S65, S66, S61, S62, S63, S64, S67, and S68</b> at 2.00–3.00 ppm                                          | S8          |                          |           |
| <b>Table S8</b> <sup>1</sup> H NMR chemical shifts and coupling constants of the methylene at β position of hydroxy group and of compounds <b>S57, S58, S59, S60, S63, S64, S65, S66, S61, S62, S67, and S68</b> | S9          |                          |           |
| Preparation and spectroscopic data of <b>1a</b> via intermediates <b>S2–S5</b>                                                                                                                                   | S12–S13     |                          | S108–S110 |
| Preparation and spectroscopic data of <b>S4</b> and <b>S5</b>                                                                                                                                                    | S12–S13     |                          | S108–S109 |
| Preparation of and spectroscopic data <b>1a</b>                                                                                                                                                                  | S13         | S110                     |           |
| Preparation and spectroscopic data of <b>1b</b> via intermediate <b>S7</b>                                                                                                                                       | S14–S15     | S111–S112                |           |
| Preparation and spectroscopic data of <b>S7</b>                                                                                                                                                                  | S14         | S111                     |           |
| Preparation and spectroscopic data of <b>1b</b>                                                                                                                                                                  | S14–S15     | S112                     |           |
| Preparation and spectroscopic data of <b>1c–1e</b> via intermediates <b>S9–S11</b>                                                                                                                               | S15–S19     | S113–S118                |           |



|                                                                                                    |         |           |
|----------------------------------------------------------------------------------------------------|---------|-----------|
| Preparation and spectroscopic data of <b>S9</b>                                                    | S15–S16 | S113      |
| Preparation and spectroscopic data of <b>S10</b>                                                   | S16–S17 | S114      |
| Preparation and spectroscopic data of <b>S11</b>                                                   | S17     | S115      |
| Preparation and spectroscopic data of <b>1c</b>                                                    | S17–S18 | S116      |
| Preparation and spectroscopic data of <b>1d</b>                                                    | S18–S19 | S117      |
| Preparation and spectroscopic data of <b>1e</b>                                                    | S19     | S118      |
| Preparation and spectroscopic data of <b>1f</b> <i>via</i> intermediates <b>S13–S15</b>            | S20–S22 | S119–S122 |
| Preparation and spectroscopic data of <b>S13</b>                                                   | S20     | S119      |
| Preparation and spectroscopic data of <b>S14</b>                                                   | S21     | S120      |
| Preparation and spectroscopic data of <b>S15</b>                                                   | S21–S22 | S121      |
| Preparation and spectroscopic data of <b>1f</b>                                                    | S22     | S122      |
| Preparation and spectroscopic data of <b>1g</b>                                                    | S22–S23 | S123      |
| Preparation and spectroscopic data of <b>1h</b>                                                    | S23–S24 | S124      |
| Preparation and spectroscopic data of <b>1i</b>                                                    | S24–S25 | S125      |
| Preparation and spectroscopic data of <b>1j</b> <i>via</i> intermediate <b>S20</b>                 | S25–S27 | S126–S127 |
| Preparation and spectroscopic data of <b>S20</b>                                                   | S25–S26 | S126      |
| Preparation and spectroscopic data of <b>1j</b>                                                    | S25–S24 | S127      |
| Preparation and spectroscopic data of <b>1k</b>                                                    | S26–S27 | S128      |
| Preparation and spectroscopic data of <b>1l</b> <i>via</i> intermediates <b>S22</b> and <b>S23</b> | S28–S30 | S129–S131 |
| Preparation and spectroscopic data of <b>S22</b>                                                   | S28     | S129      |
| Preparation and spectroscopic data of <b>S23</b>                                                   | S29     | S130      |
| Preparation and spectroscopic data of <b>1l</b>                                                    | S29–S30 | S131      |
| Preparation and spectroscopic data of <b>1m</b> <i>via</i> intermediates <b>S25–S27</b> .          | S30–S32 | S132–S135 |
| Preparation and spectroscopic data of <b>S25</b>                                                   | S30     | S132      |

|                                                                                             |         |           |
|---------------------------------------------------------------------------------------------|---------|-----------|
| Preparation and spectroscopic data of <b>S26</b>                                            | S31     | S133      |
| Preparation and spectroscopic data of <b>S27</b>                                            | S31–S32 | S134      |
| Preparation and spectroscopic data of <b>1m</b>                                             | S32     | S135      |
| Preparation and spectroscopic data of <b>1n</b> via intermediate <b>S29</b>                 | S32–S34 | S136–S137 |
| Preparation and spectroscopic data of <b>S29</b>                                            | S33     | S136      |
| Preparation and spectroscopic data of <b>1n</b>                                             | S33–S34 | S137      |
| Preparation and spectroscopic data of <b>1o</b> via intermediates <b>S31</b> and <b>S32</b> | S34–S36 | S138–S140 |
| Preparation and spectroscopic data of <b>S31</b>                                            | S34–S35 | S138      |
| Preparation and spectroscopic data of <b>S32</b>                                            | S35     | S139      |
| Preparation and spectroscopic data of <b>1o</b>                                             | S36     | S140      |
| Preparation and spectroscopic data of <b>1p</b> via intermediates <b>S34</b> and <b>S35</b> | S34–S36 | S141–S143 |
| Preparation and spectroscopic data of <b>S34</b>                                            | S36–S37 | S141      |
| Preparation and spectroscopic data of <b>S35</b>                                            | S37–S38 | S142      |
| Preparation and spectroscopic data of <b>1p</b>                                             | S38     | S143      |
| Preparation and spectroscopic data of <b>7a</b> via intermediates <b>S2</b> and <b>S4</b>   | S39–S40 | S144–S145 |
| Preparation and spectroscopic data of <b>S2</b>                                             | S39     | S144      |
| Preparation of <b>S4</b>                                                                    | S39     | S108      |
| Preparation and spectroscopic data of <b>7a</b>                                             | S40     | S145      |
| Preparation and spectroscopic data of <b>7b</b> via intermediates <b>S37</b> and <b>S38</b> | S40–S41 | S146–S148 |
| Preparation and spectroscopic data of <b>S37</b>                                            | S40–S41 | S146      |
| Preparation and spectroscopic data of <b>S38</b>                                            | S41     | S147      |
| Preparation of <b>7b</b>                                                                    | S42     | S148      |
| Preparation of <b>7c</b>                                                                    | S42–S43 | S149      |
| Preparation and spectroscopic data of <b>7d</b> via                                         | S43–S44 | S150–S151 |

|                                                                                                |         |           |
|------------------------------------------------------------------------------------------------|---------|-----------|
| intermediates <b>S42</b>                                                                       |         |           |
| Preparation and spectroscopic data of <b>S42</b>                                               | S43–S44 | S150      |
| Preparation and spectroscopic data of <b>7d</b>                                                | S44     | S151      |
| Preparation and spectroscopic data of <b>7e</b> via intermediate <b>S44</b>                    | S44–S46 | S152–S153 |
| Preparation and spectroscopic data of <b>S44</b>                                               | S45     | S152      |
| Preparation and spectroscopic data of <b>7e</b>                                                | S45–S46 | S153      |
| Preparation and spectroscopic data of <b>7f</b> via intermediates <b>S46–S49</b>               | S46–S50 | S154–S158 |
| Preparation and spectroscopic data of <b>S46</b>                                               | S46–S47 | S154      |
| Preparation and spectroscopic data of <b>S47</b>                                               | S47–S48 | S155      |
| Preparation and spectroscopic data of <b>S48</b>                                               | S48–S49 | S156      |
| Preparation and spectroscopic data of <b>S49</b>                                               | S49–S50 | S157      |
| Preparation and spectroscopic data of <b>7f</b>                                                | S50     | S158      |
| Preparation and spectroscopic data of <b>3a</b> and <b>3a'</b>                                 | S51–S52 | S159–S163 |
| Preparation and spectroscopic data of <b>3c</b>                                                | S53     | S164–S166 |
| Preparation and spectroscopic data of <b>3d</b>                                                | S53–S54 | S166–S168 |
| Preparation and spectroscopic data of <b>3e</b>                                                | S54–S55 | S169–S171 |
| Preparation and spectroscopic data of <b>3f</b>                                                | S55     | S171–S173 |
| Preparation and spectroscopic data of <b>3g</b>                                                | S55–S56 | S174–S176 |
| Preparation and spectroscopic data of <b>3h</b>                                                | S56–S57 | S176–S178 |
| Preparation and spectroscopic data of <b>3i</b>                                                | S57     | S179–S181 |
| Preparation and spectroscopic data of <b>3j</b>                                                | S58     | S181–S183 |
| Preparation and spectroscopic data of <b>3k</b>                                                | S58–S59 | S184–S186 |
| Preparation and spectroscopic data of <b>3l</b> and <b>3l'</b>                                 | S59–S60 | S186–S191 |
| Preparation and spectroscopic data of <b>3m</b> <sup>BrBz</sup> and <b>3m'</b> <sup>BrBz</sup> | S60–S61 | S191–S196 |
| Preparation and spectroscopic data of <b>3n</b> and <b>3n'</b>                                 | S61–S62 | S196–S200 |
| Preparation and spectroscopic data of <b>3o</b>                                                | S63     | S201–S203 |

|                                                                   |         |           |
|-------------------------------------------------------------------|---------|-----------|
| Preparation and spectroscopic data of <b>3p</b>                   | S63–S64 | S203–S205 |
| Preparation and spectroscopic data of <b>4a</b>                   | S64     | S206–S208 |
| Preparation and spectroscopic data of <b>4b</b>                   | S65     | S208–S210 |
| Preparation and spectroscopic data of <b>4c</b>                   | S65–S66 | S211–S213 |
| Preparation and spectroscopic data of <b>4d</b>                   | S66     | S213–S215 |
| Preparation and spectroscopic data of <b>4e</b>                   | S67     | S216–S218 |
| Preparation and spectroscopic data of <b>6a</b>                   | S67–S68 | S218–S220 |
| Preparation and spectroscopic data of <b>6b</b>                   | S68     | S221–S223 |
| Preparation and spectroscopic data of <b>6c</b>                   | S69     | S223–S225 |
| Preparation and spectroscopic data of <b>D-8a</b> and <b>L-8a</b> | S69–S70 | S226–S227 |
| Preparation and spectroscopic data of <b>D-8b</b> and <b>L-8b</b> | S70–S71 | S228–S229 |
| Preparation and spectroscopic data of <b>D-8c</b> and <b>L-8c</b> | S72     | S230–S231 |
| Preparation and spectroscopic data of <b>D-8d</b> and <b>L-8d</b> | S73     | S232–S233 |
| Preparation and spectroscopic data of <b>D-8e</b> and <b>L-8e</b> | S74     | S234–S235 |
| Preparation and spectroscopic data of <b>D-8f</b> and <b>L-8f</b> | S75–S76 | S236–S237 |
| Preparation and spectroscopic data of <b>9</b>                    | S76     | S238      |
| Preparation and spectroscopic data of <b>11</b>                   | S77     | S239      |
| Preparation and spectroscopic data of <b>13</b> and <b>14</b>     | S77–S79 | S240–S241 |
| Preparation and spectroscopic data of <b>15</b>                   | S80     | S242      |
| Preparation and spectroscopic data of <b>S52</b> and <b>S53</b>   | S80–S81 | S243–S244 |
| Preparation and spectroscopic data of <b>S54</b>                  | S81–S82 | S245      |
| Preparation and spectroscopic data of <b>S55</b>                  | S82–S83 | S246      |
| Preparation and spectroscopic data of <b>S56</b>                  | S83     | S247      |
| Preparation and spectroscopic data of <b>S57</b>                  | S83–S84 | S248      |
| Preparation and spectroscopic data of <b>S58</b>                  | S84–S85 | S249      |
| Preparation and spectroscopic data of <b>S59</b>                  | S85     | S250      |
| Preparation and spectroscopic data of <b>S60</b>                  | S86     | S251      |
| Preparation and spectroscopic data of <b>S61</b>                  | S86–S87 | S252      |
| Preparation and spectroscopic data of <b>S62</b>                  | S87     | S253      |

|                                                  |           |           |
|--------------------------------------------------|-----------|-----------|
| Preparation and spectroscopic data of <b>S63</b> | S88       | S254      |
| Preparation and spectroscopic data of <b>S64</b> | S88–S89   | S255      |
| Preparation and spectroscopic data of <b>S65</b> | S89–S90   | S256      |
| Preparation and spectroscopic data of <b>S66</b> | S90       | S257      |
| Preparation and spectroscopic data of <b>S67</b> | S91       | S258      |
| Preparation and spectroscopic data of <b>S68</b> | S91–S92   | S259      |
| Preparation and spectroscopic data of <b>S69</b> | S93       | S260–S261 |
| Preparation and spectroscopic data of <b>S70</b> | S93–S94   | S261–S262 |
| Preparation and spectroscopic data of <b>S71</b> | S94–S95   | S263–S264 |
| Preparation and spectroscopic data of <b>S72</b> | S95       | S264–S265 |
| Preparation and spectroscopic data of <b>S73</b> | S96       | S266–S267 |
| Preparation and spectroscopic data of <b>S74</b> | S96–S97   | S267–S268 |
| Preparation and spectroscopic data of <b>S75</b> | S97–S98   | S269–S270 |
| Preparation and spectroscopic data of <b>S76</b> | S98       | S270–S271 |
| Preparation and spectroscopic data of <b>S78</b> | S99–S100  | S272      |
| Preparation and spectroscopic data of <b>S79</b> | S100–S101 | S273      |
| Preparation and spectroscopic data of <b>S80</b> | S101      | S274      |
| Preparation and spectroscopic data of <b>S81</b> | S101–S102 | S275      |
| Preparation and spectroscopic data of <b>S82</b> | S102      | S276      |
| Preparation and spectroscopic data of <b>S83</b> | S103      | S277      |
| Preparation and spectroscopic data of <b>18</b>  | S103–S104 | S278      |
| Preparation and spectroscopic data of <b>17</b>  | S104      | S279–S281 |
| Preparation and spectroscopic data of <b>20</b>  | S104–S105 | S281–S282 |
| Preparation and spectroscopic data of <b>16</b>  | S105–S106 | S282–S283 |
| References                                       | S106–S107 | –         |

## General information

Unless otherwise stated, all commercially obtained reagents were used directly without further purification and all reactions were carried out in glassware or a standard Schlenk technique with magnetic stirring. Anhydrous dichloromethane (DCM), tetrahydrofuran (THF) and *N,N*-dimethylformamide (DMF) were obtained from an MBraun solvent purification system (SPS-800). Flash column chromatography was performed on Silica Gel H (300-400 or 200-300 mesh, Qingdao, China) using petroleum ether (PE), ethyl acetate (EA), DCM, methanol (MeOH) and mixtures thereof as the eluent. Analytical thin layer chromatography (TLC) was performed on Silicycle SiliaPlate glass-backed plates coated with silica gel (60 Å pore size, F-254 indicator) and visualized by exposure to ultraviolet light and/or staining with 8% sulfuric acid in methanol. HRMS (High-resolution mass spectra) were determined with a Thermo LTQ Orbitrap XL high-resolution mass spectrometer. Optical rotations were determined with a JASCO P-1010 digital polarimeter. NMR spectra were measured on a Bruker AVENCE NEO 400 MHz spectrometer using chloroform-*d* (CDCl<sub>3</sub>), methanol-*d*<sub>4</sub> as the solvent. Chemical shift values are reported in ppm with the solvent resonance as the internal standard (TMS:  $\delta$  0.00 for <sup>1</sup>H, Chloroform-*d*:  $\delta$  7.26 for <sup>1</sup>H,  $\delta$  77.00 for <sup>13</sup>C, Methanol-*d*<sub>4</sub>:  $\delta$  3.31 for <sup>1</sup>H,  $\delta$  49.15 for <sup>13</sup>C. Data are reported as follows: chemical shifts ( $\delta$ ), multiplicity (s = singlet, d = doublet, dd = double doublet, t = triplet, m = multiplet), coupling constants *J* (Hz).

**Table S1 Optimization of reaction condition<sup>a</sup>**
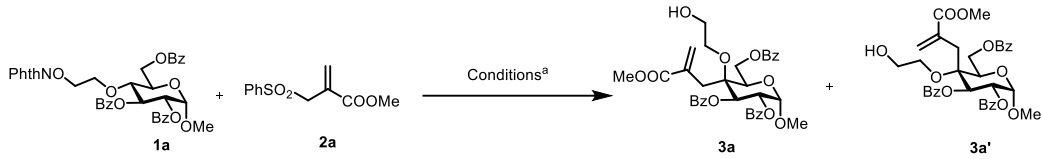

| Entry           | Solvents                  | Concentration (mol/L) | Yield of <b>3a</b> <sup>b</sup> | Yield of <b>3a'</b> <sup>b</sup> |
|-----------------|---------------------------|-----------------------|---------------------------------|----------------------------------|
| 1               | 1,4-dioxane               | 0.05                  | 42% (38%) <sup>c</sup>          | 20% (21%) <sup>c</sup>           |
| 2               | THF                       | 0.05                  |                                 | trace                            |
| 3               | CH <sub>3</sub> CN        | 0.05                  |                                 | no reaction                      |
| 4               | Actone                    | 0.05                  | 34%                             | 12%                              |
| 5               | PhCF <sub>3</sub>         | 0.05                  | 40%                             | 20%                              |
| 6               | PhCl                      | 0.05                  | 26%                             | 18%                              |
| 7               | PhMe                      | 0.05                  | 27%                             | 17%                              |
| 8               | DCE                       | 0.05                  | 33%                             | 14%                              |
| 9               | MTBE                      | 0.05                  |                                 | no reaction                      |
| 10              | MTBE/1,4-dioxane<br>(9:1) | 0.05                  | 40%                             | 20%                              |
| 11              | 1,4-dioxane               | 0.1                   | 37%                             | 17%                              |
| 12              | 1,4-dioxane               | 0.2                   | 28%                             | 13%                              |
| 13 <sup>d</sup> | 1,4-dioxane               | 0.1                   | 42%                             | 18%                              |
| 14 <sup>e</sup> | 1,4-dioxane               | 0.05                  |                                 | no reaction                      |
| 15 <sup>f</sup> | 1,4-dioxane               | 0.05                  |                                 | no reaction                      |

<sup>a</sup>Conditions: **1a** (0.10 mmol, 1.0 equiv), **2a** (0.30 mmol, 3.0 equiv), *fac*-Ir(ppy)<sub>3</sub> (0.001 mmol, 0.01 equiv) and Hantzsch ester (0.15 mmol, 1.5 equiv) in 2.0 mL solvent under argon atmosphere with blue LEDs (450 nm-470 nm) irradiation at 35 °C for 3 h, unless otherwise noted; <sup>b</sup>The Yields were determined by <sup>1</sup>H NMR analysis using 3,4,5-trichloropyridine as an internal standard; <sup>c</sup>The yields in the parenthesis were the isolated yields; <sup>d</sup> **2a** (0.60 mmol, 6.0 equiv) was used; <sup>e</sup>no light; <sup>f</sup>no *fac*-Ir(ppy)<sub>3</sub>.

**Table S2 Removal of the directing group 2-hydroxyethylene moiety of branched-chain sugars.**

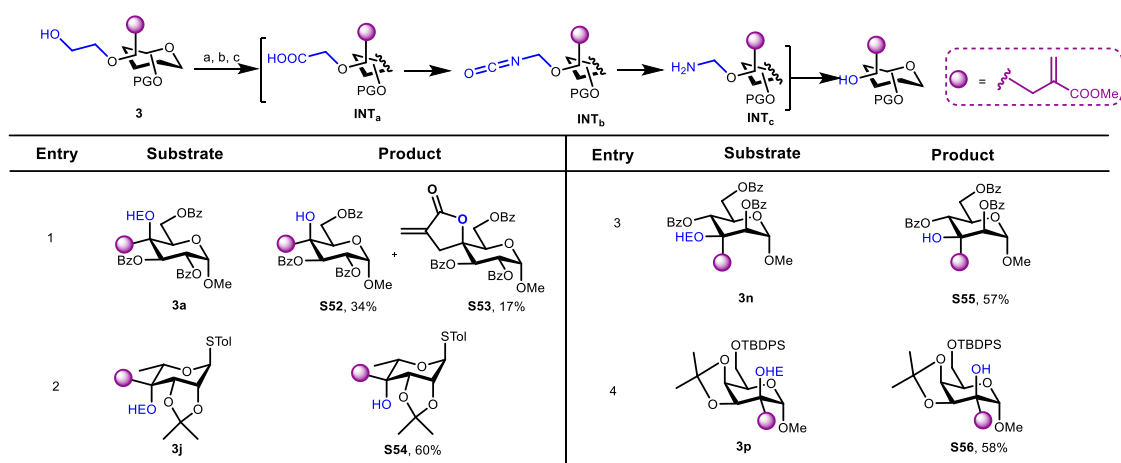

Reaction conditions: (a) TEMPO (0.1 equiv), BAIB (2.0 equiv), CH<sub>2</sub>Cl<sub>2</sub>/H<sub>2</sub>O, rt, 3 h; (b) DPPA (1.2 equiv), DIPEA (1.2 equiv), DMF, rt, 3 h; (c) H<sub>2</sub>O, 100 °C, 2 h.

**Table S3 Removal of the directing group 2-hydroxyethylene moiety of higher-carbon sugars.**

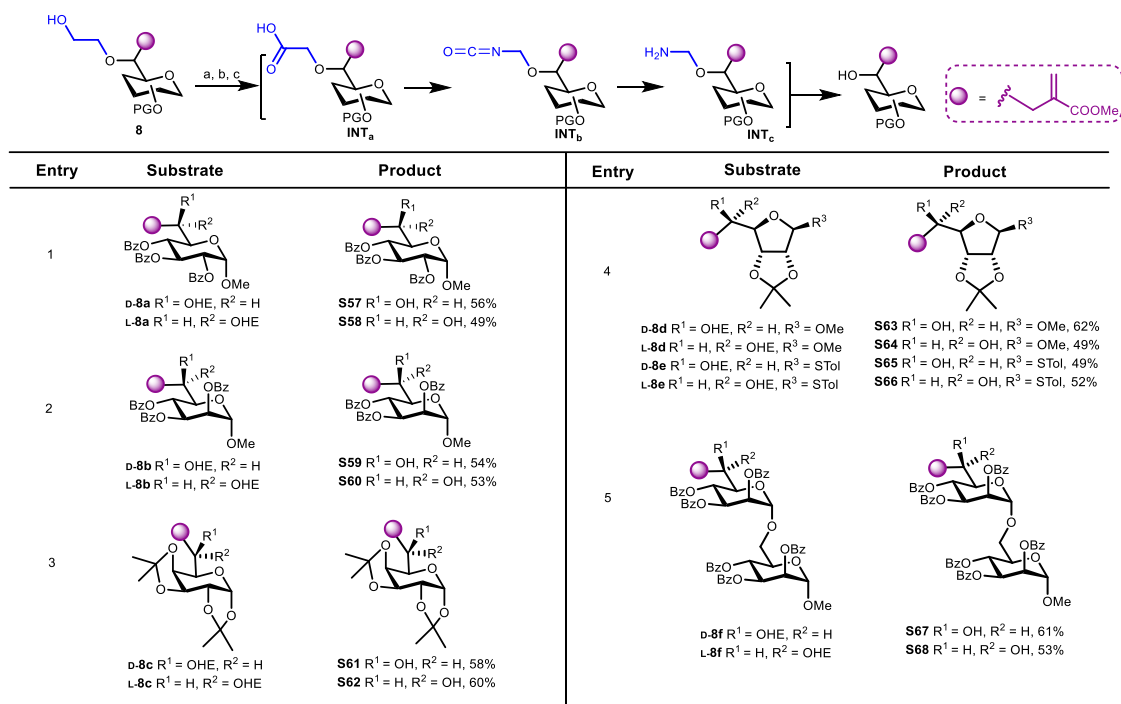

Reaction conditions: (a) TEMPO (0.1 equiv), BAIB (2.0 equiv), CH<sub>2</sub>Cl<sub>2</sub>/H<sub>2</sub>O, rt, 3 h; (b) DPPA (1.2 equiv), DIPEA (1.2 equiv), DMF, rt, 3 h; (c) H<sub>2</sub>O, 100 °C, 2 h.



## Stereochemical confirmation of compound S58 by Mosher ester analysis

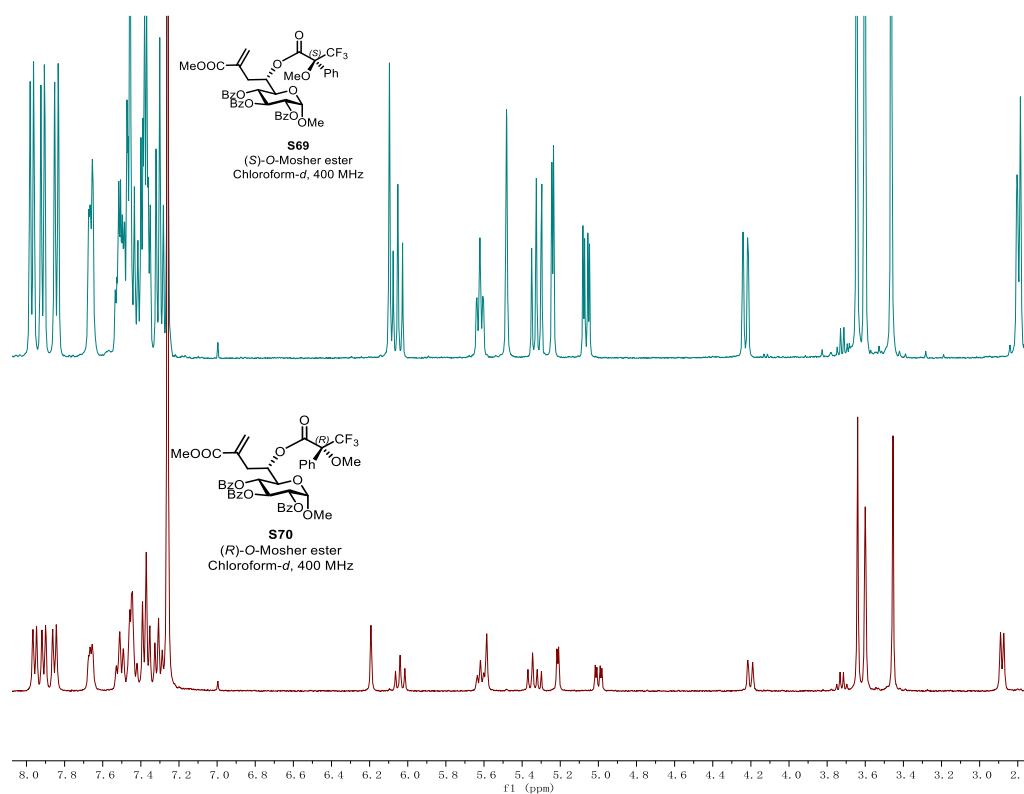

Figure S1 <sup>1</sup>H NMR spectra of (*S*)-*O*-mosher ester S69 and (*R*)-*O*-mosher ester S70

Table S4 <sup>1</sup>H NMR chemical shifts and  $\Delta\delta$  values of (*S*)-*O*-mosher ester S69 and (*R*)-*O*-mosher ester S70

|                                                             | NO.  | $\delta_S$ | $\delta_R$ | $\Delta\delta = \delta_S - \delta_R$ |
|-------------------------------------------------------------|------|------------|------------|--------------------------------------|
| <p>Mosher Model</p> <p><math>\Delta\delta &lt; 0</math></p> | 1    | 5.24       | 5.21       | 0.03                                 |
|                                                             | 2    | 5.06       | 5.00       | 0.06                                 |
| <p>Mosher Model</p> <p><math>\Delta\delta &gt; 0</math></p> | 3    | 6.05       | 6.04       | 0.01                                 |
|                                                             | 4    | 5.35       | 5.32       | 0.03                                 |
|                                                             | 5    | 4.22       | 4.21       | 0.01                                 |
|                                                             | 6    | 2.79       | 2.88       | -0.07                                |
|                                                             | 7a   | 6.10       | 6.19       | -0.09                                |
| 7b                                                          | 5.48 | 5.58       | -0.1       |                                      |

## Stereochemical confirmation of compound S60 by Mosher ester analysis

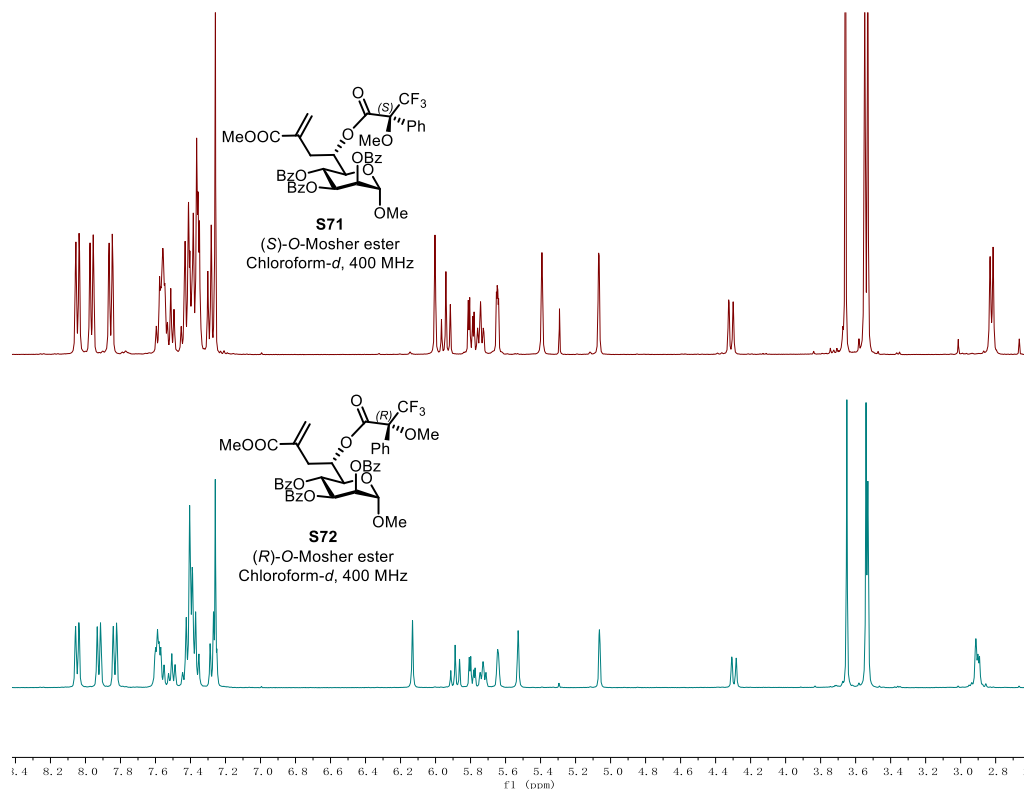

Figure S2  $^1\text{H}$  NMR spectra of (*S*)-*O*-mosher ester S71 and (*R*)-*O*-mosher ester S72

Table S5  $^1\text{H}$  NMR chemical shifts and  $\Delta\delta$  values of (*S*)-*O*-mosher ester S71 and (*R*)-*O*-mosher ester S72

|                     | NO. | $\delta_S$ | $\delta_R$ | $\Delta\delta = \delta_S - \delta_R$ |
|---------------------|-----|------------|------------|--------------------------------------|
| <p>Mosher Model</p> | 1   | 5.07       | 5.06       | 0.01                                 |
|                     | 2   | 5.65       | 5.64       | 0.01                                 |
|                     | 3   | 5.80       | 5.79       | 0.01                                 |
|                     | 4   | 5.94       | 5.89       | 0.05                                 |
|                     | 5   | 4.31       | 4.30       | 0.01                                 |
| <p>Mosher Model</p> | 6   | 2.82       | 2.90       | -0.08                                |
|                     | 7a  | 6.00       | 6.13       | -0.13                                |
|                     | 7b  | 5.33       | 5.53       | -0.20                                |

## Stereochemical confirmation of compound S61 by Mosher ester analysis

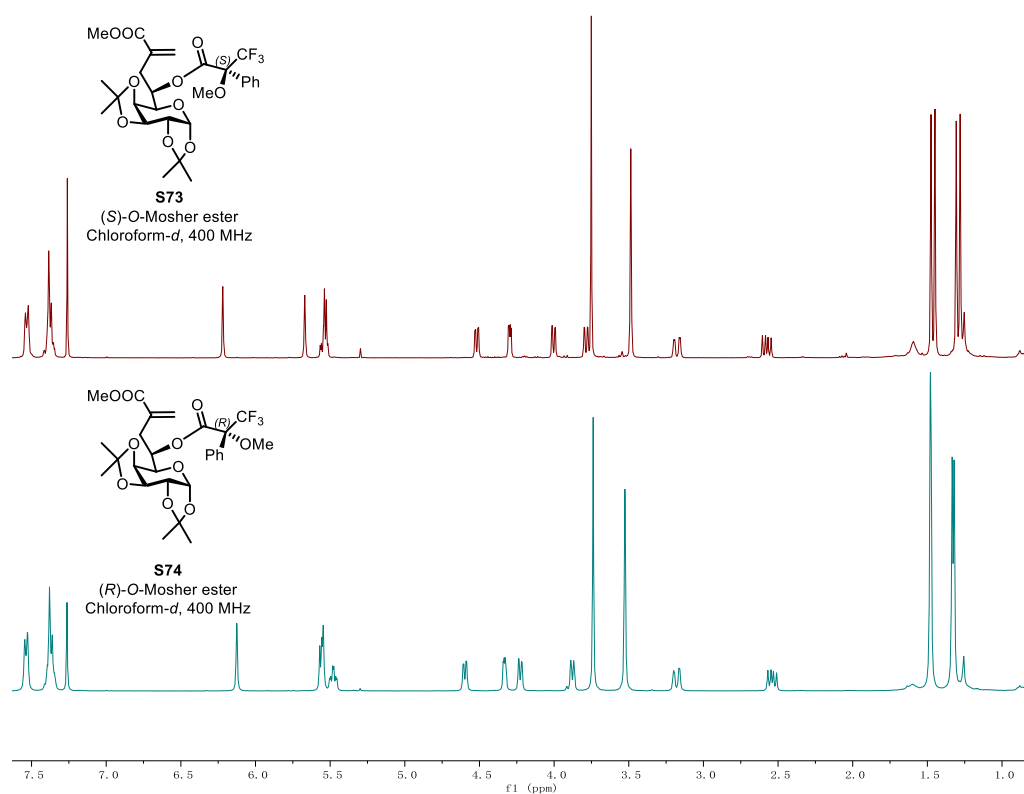

**Figure S3**  $^1\text{H}$  NMR spectra of (*S*)-*O*-mosher ester **S73** and (*R*)-*O*-mosher ester **S74**

**Table S6**  $^1\text{H}$  NMR chemical shifts and  $\Delta\delta$  values of (*S*)-*O*-mosher ester **S73** and (*R*)-*O*-mosher ester **S74**

| NO. | $\delta_S$ | $\delta_R$ | $\Delta\delta = \delta_S - \delta_R$ |
|-----|------------|------------|--------------------------------------|
| 1   | 5.53       | 5.53       | 0                                    |
| 2   | 4.30       | 4.33       | -0.03                                |
| 3   | 4.52       | 4.60       | -0.08                                |
| 4   | 4.00       | 4.23       | -0.23                                |
| 5   | 3.79       | 3.88       | -0.09                                |
| 6a  | 2.58       | 2.54       | 0.04                                 |
| 6b  | 3.18       | 3.18       | 0                                    |
| 7a  | 5.67       | 5.55       | 0.12                                 |
| 7b  | 6.22       | 6.13       | 0.09                                 |

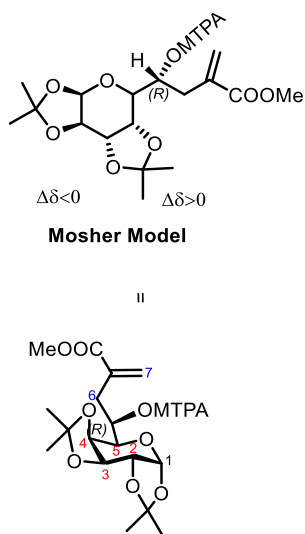

## Stereochemical confirmation of compound S65 by Mosher ester analysis

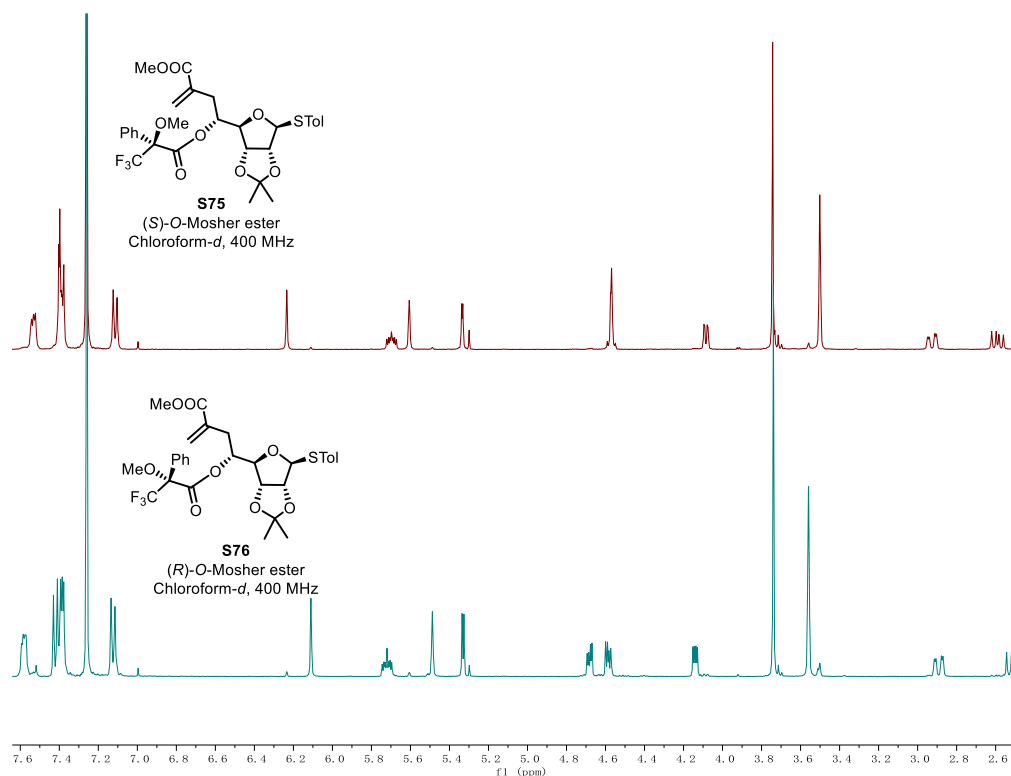

Figure S4  $^1\text{H}$  NMR spectra of (*S*)-*O*-mosher ester S75 and (*R*)-*O*-mosher ester S76

Table S7  $^1\text{H}$  NMR chemical shifts and  $\Delta\delta$  values of (*S*)-*O*-mosher ester S75 and (*R*)-*O*-mosher ester S76

|                      | NO. | $\delta_S$ | $\delta_R$ | $\Delta\delta = \delta_S - \delta_R$ |
|----------------------|-----|------------|------------|--------------------------------------|
| <p>Moshier Model</p> | 1   | 5.33       | 5.33       | 0                                    |
|                      | 2   | 4.59       | 4.59       | 0                                    |
|                      | 3   | 4.68       | 4.59       | 0.11                                 |
|                      | 4   | 4.08       | 4.14       | -0.06                                |
|                      | 5a  | 2.59       | 2.51       | 0.08                                 |
|                      | 5b  | 2.93       | 2.89       | 0.04                                 |
|                      | 6a  | 6.24       | 6.11       | 0.13                                 |
|                      | 6b  | 5.61       | 5.49       | 0.12                                 |

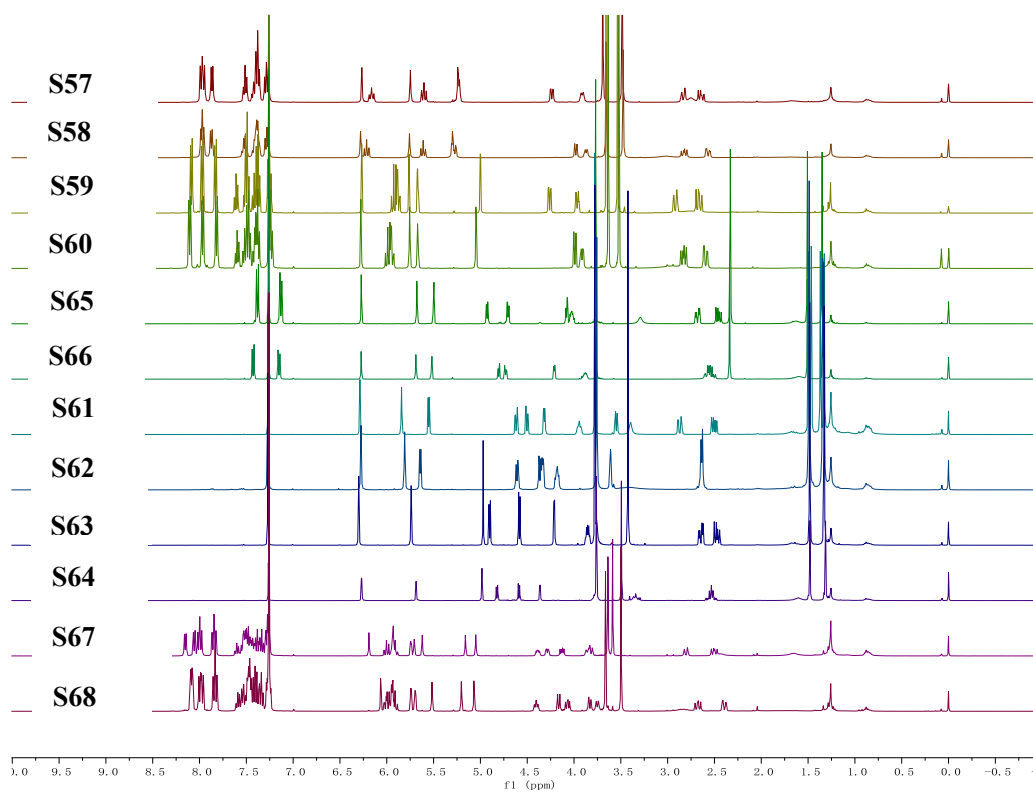

**Figure S5 Full  $^1\text{H}$  NMR spectra of compounds S57, S58, S59, S60, S65, S66, S61, S62, S63, S64, S67, and S68**

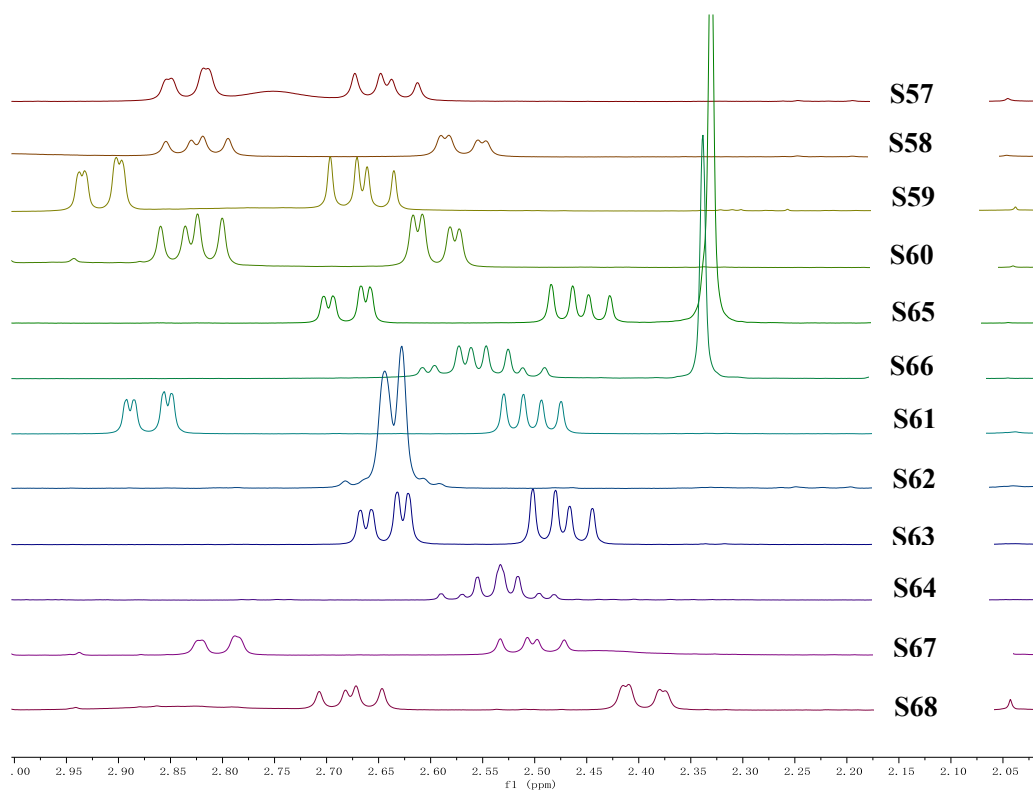

**Figure S6 Expanded  $^1\text{H}$  NMR spectra of compounds S57, S58, S59, S60, S65, S66, S61, S62, S63, S64, S67, and S68 at 2.00–3.00 ppm**

**Table S8 <sup>1</sup>H NMR chemical shifts and coupling constants of the methylene at β position of hydroxy group and of compounds S57, S58, S59, S60, S65, S66, S61, S62, S63, S64, S67, and S68**

| <b>Compound</b>        | <b>δH<sub>a</sub> (J)</b>           | <b>δH<sub>b</sub> (J)</b>            |
|------------------------|-------------------------------------|--------------------------------------|
| <b>S57</b>             | 2.83 (dd, <i>J</i> = 14.2, 1.8 Hz)  | 2.64 (dd, <i>J</i> = 14.1, 9.9 Hz)   |
| <b>S58<sup>a</sup></b> | 2.82 (dd, <i>J</i> = 14.1, 9.7 Hz)  | 2.57 (dd, <i>J</i> = 14.2, 3.0 Hz)   |
| <b>S59</b>             | 2.92 (dd, <i>J</i> = 14.2, 2.0 Hz)  | 2.67 (dd, <i>J</i> = 14.2, 10.3 Hz). |
| <b>S60<sup>a</sup></b> | 2.83 (dd, <i>J</i> = 14.2, 9.5 Hz)  | 2.59 (dd, <i>J</i> = 14.2, 3.5 Hz).  |
| <b>S65<sup>a</sup></b> | 2.68 (dd, <i>J</i> = 14.3, 3.5 Hz)  | 2.46 (dd, <i>J</i> = 14.3, 8.2 Hz)   |
| <b>S66</b>             | 2.52 (dd, <i>J</i> = 14.0, 8.4 Hz)  | 2.58 (dd, <i>J</i> = 14.0, 4.6 Hz)   |
| <b>S61<sup>a</sup></b> | 2.87 (dd, <i>J</i> = 14.5, 2.8 Hz)  | 2.50 (dd, <i>J</i> = 14.4, 7.6 Hz)   |
| <b>S62</b>             | 2.67–2.60 (m, -)                    | 2.67–2.60 (m, -)                     |
| <b>S63<sup>b</sup></b> | 2.64 (dd, <i>J</i> = 14.2, 4.1 Hz)  | 2.47 (dd, <i>J</i> = 14.1, 8.8 Hz)   |
| <b>S64<sup>b</sup></b> | 2.54 (dd, <i>J</i> = 14.4, 10.2 Hz) | 2.51 (dd, <i>J</i> = 14.0, 5.8 Hz)   |
| <b>S67<sup>b</sup></b> | 2.80 (dd, <i>J</i> = 14.1, 1.4 Hz)  | 2.50 (dd, <i>J</i> = 14.1, 10.4 Hz)  |
| <b>S68<sup>b</sup></b> | 2.68 (dd, <i>J</i> = 14.1, 10.1 Hz) | 2.40 (dd, <i>J</i> = 14.1, 2.1 Hz)   |

<sup>a</sup>The configuration of C6-OH in pyranoid sugars and C5-OH in in furanoid sugars was determined by use of Mosher ester analysis; <sup>b</sup>The configuration of C6-OH in pyranoid sugars and C5-OH in in furanoid sugars was figured out by analogy.

### General Procedure A: Allyl installation using NaH/AlIBr.

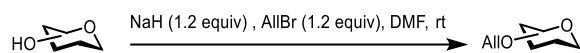

To a solution of alcohol (1.0 equiv) in dry DMF (20.0 mL) were added allyl bromide (AlIBr) (1.2 equiv) and 60% dispersion of NaH in mineral oil (1.2 equiv) in ice bath under an argon atmosphere. The resultant solution was stirred at room temperature for 3 h. The reaction was quenched with  $\text{NH}_4\text{Cl}$  solution in ice bath. The resultant mixture was extracted with DCM, and the organic layer was washed with brine. The organic layer was collected, dried over  $\text{Na}_2\text{SO}_4$ , filtered off the solid and concentrated *in vacuo*. The residue was purified by flash silica gel column chromatography to give the desired product.

### General Procedure B: Allyl installation using 2,4,6-tris(allyloxy)-1,3,5-triazine/TfOH.<sup>[1]</sup>

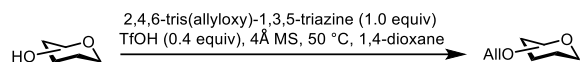

A mixture of alcohol (1.0 equiv) and freshly activated 4Å MS in anhydrous 1,4-dioxane was stirred at room temperature under an argon atmosphere for 1 h. 2,4,6-tris(allyloxy)-1,3,5-triazine (1.0 equiv) and trifluoromethanesulfonic acid (TfOH) (0.4 equiv) were added at room temperature and then warmed to 55 °C. After TLC indicates full conversion, the reaction was filtered through a pad of Celite, the filtrate was diluted with DCM, then washed sequentially with saturated  $\text{NaHCO}_3$  solution and brine. The organic layer was collected, dried over  $\text{Na}_2\text{SO}_4$ , filtered off the solid and concentrated *in vacuo*. The residue was purified by flash silica gel column chromatography to give the desired product.

### General Procedure C: Oxidative cleavage of double bond to aldehyde and reduction to alcohol.

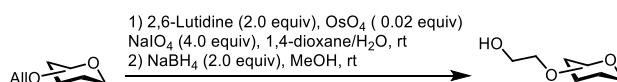

To a solution of olefin (1.0 equiv) in 1,4-dioxane/H<sub>2</sub>O ( $v/v = 3:1$ ) were added 2,6-lutidine (2.0 equiv), OsO<sub>4</sub> (0.0234 mol/L solution in *t*-BuOH, 0.02 equiv) and NaIO<sub>4</sub> (4.0 equiv) at room temperature under an argon atmosphere. The resultant solution was stirred for 12 h and quenched with saturated aqueous Na<sub>2</sub>SO<sub>3</sub> solution at 0 °C. The resultant mixture was extracted with EA, and the organic layer was washed with brine. The organic layer was collected, dried over Na<sub>2</sub>SO<sub>4</sub>, filtered off the solid and concentrated *in vacuo* to give the crude product without further purification for next step. The crude product obtained as above was dissolved in dry MeOH, NaBH<sub>4</sub> (2.0 equiv) was added in ice bath under an argon atmosphere. After stirring for 1 h at room temperature, the reaction was quenched with saturated aqueous NH<sub>4</sub>Cl solution in ice bath. The resultant mixture was extracted with DCM, and the organic layer was washed with 1M HCl solution and brine. The organic layer was collected, dried over Na<sub>2</sub>SO<sub>4</sub>, filtered off the solid and concentrated *in vacuo*. The residue was purified by flash silica gel column chromatography to give the desired product.

#### General Procedure D: Synthesis of *N*-alkoxyphthalimide by Mitsunobu reaction.

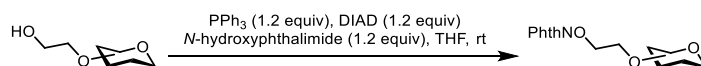

To a solution of alcohol (1.0 equiv), PPh<sub>3</sub> (1.2 equiv) and *N*-hydroxyphthalimide (1.2 equiv) in THF was added diisopropylazodicarboxylate (DIAD) (1.2 equiv) over 3 min at room temperature under an argon atmosphere for 2 h. The mixture was diluted with DCM and washed with saturated NaHCO<sub>3</sub> solution and brine. The organic layer was collected, dried over Na<sub>2</sub>SO<sub>4</sub>, filtered off the solid and concentrated *in vacuo*. The residue was purified by flash silica gel column chromatography to give the desired product.



## Preparation of 1a via intermediates S2–S5

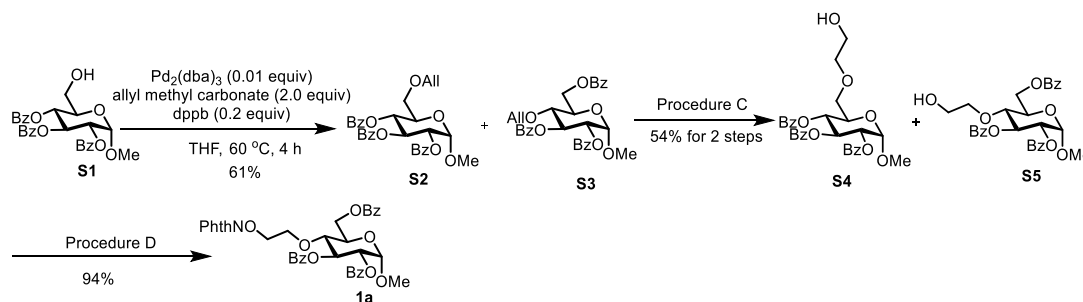

## Methyl 2,3,4-tri-*O*-benzoyl-6-*O*-(2-hydroxyethyl)- $\alpha$ -D-glucopyranoside (S4) and Methyl 2,3,6-tri-*O*-benzoyl-4-*O*-(2-hydroxyethyl)- $\alpha$ -D-glucopyranoside (S5)

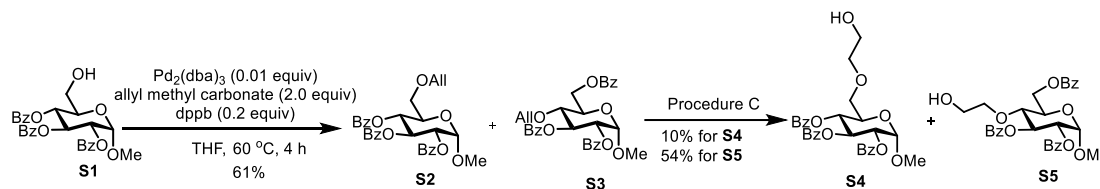

To a solution of **S1**<sup>[2]</sup> (2.02 g, 4.00 mmol, 1.0 equiv) in THF (10.0 mL) was added allyl methyl carbonate (845  $\mu\text{L}$ , 8.00 mmol, 2.0 equiv). A mixture of tris(dibenzylideneacetone)dipalladium ( $\text{Pd}_2(\text{dba})_3$ ) (37.0 mg, 40.0  $\mu\text{mol}$ , 0.01 equiv) and 1,4-bis(diphenylphosphino)butane (dppb) (344.0 mg, 800.0  $\mu\text{mol}$ , 0.2 equiv) in degassed THF (3.2 mL) was added at room temperature under an argon atmosphere. The mixture was warmed to 60 °C and stirred for 4 h. The mixture was evaporated to dryness and the residue was purified by flash silica gel column chromatography to give **S2** and **S3** (1.35 g, 2.47 mmol, 61%) as an inseparable mixture.

Following the general procedure C, **S2** and **S3** (1.35g, 2.47 mmol, 1.0 equiv) were treated with (575  $\mu\text{L}$ , 4.94 mmol, 2.0 equiv),  $\text{OsO}_4$  (0.0234 mol/L solution in *t*-BuOH, 2.1 mL, 49.4  $\mu\text{mol}$ , 0.02 equiv) and  $\text{NaIO}_4$  (2.12 g, 9.88 mmol, 4.0 equiv) in 1,4-dioxane/ $\text{H}_2\text{O}$  (12.0 mL, *v/v* = 3:1) to give the aldehyde. The aldehyde was treated with  $\text{NaBH}_4$  (280.1 mg, 7.41 mmol, 3.0 equiv) in MeOH (10.0 mL) to give **S4** (136.0 mg, 237.5  $\mu\text{mol}$ , 10%) and **S5** (735.0 mg, 1.34 mmol, 54%) as white foam after purification by silica gel column chromatography (PE:EA = 2:1).

**For S4:**  $[\alpha]_{\text{D}}^{25} = +59.17$  (*c* 2.4,  $\text{CHCl}_3$ );  $^1\text{H NMR}$  (400 MHz, Chloroform-*d*)  $\delta$  8.01–7.94 (m, 4H), 7.89–7.84 (m, 2H), 7.55–7.46 (m, 2H), 7.45–7.32 (m, 5H), 7.31–7.26 (m, 2H),

6.17 (t,  $J = 9.5$  Hz, 1H), 5.77 (t,  $J = 9.9$  Hz, 1H), 5.33–5.24 (m, 2H), 4.25–4.15 (m, 1H), 3.83–3.71 (m, 3H), 3.71–3.62 (m, 2H), 3.53–3.45 (m, 4H), 2.71 (brs, 1H).  $^{13}\text{C}$  NMR (101 MHz, Chloroform-*d*)  $\delta$  165.83, 165.77, 133.6, 133.4, 133.1, 129.95, 129.93, 129.7, 129.2, 129.1, 128.9, 128.5, 128.4, 128.3, 97.2, 73.2, 72.1, 70.5, 69.2, 69.1, 68.7, 61.6, 55.7; HRMS (ESI)  $m/z$  calcd for  $\text{C}_{30}\text{H}_{34}\text{NO}_{10}$   $[\text{M}+\text{NH}_4]^+$  568.2177, found 568.2185.

**For S5:**  $[\alpha]_{\text{D}}^{25} = +104.89$  ( $c$  1.6,  $\text{CHCl}_3$ );  $^1\text{H}$  NMR (400 MHz, Chloroform-*d*)  $\delta$  8.15–8.07 (m, 2H), 8.04–7.92 (m, 4H), 7.65–7.56 (m, 1H), 7.54–7.46 (m, 4H), 7.42–7.33 (m, 4H), 6.06–5.98 (m, 1H), 5.21 (dd,  $J = 10.2, 3.6$  Hz, 1H), 5.14 (d,  $J = 3.6$  Hz, 1H), 4.76–4.63 (m, 2H), 4.20–4.14 (m, 1H), 3.78 (t,  $J = 9.6$  Hz, 1H), 3.74–3.66 (m, 2H), 3.65–3.52 (m, 2H), 3.44 (s, 3H), 2.18 (t,  $J = 6.2$  Hz, 1H);  $^{13}\text{C}$  NMR (101 MHz, Chloroform-*d*)  $\delta$  166.4, 166.1, 166.0, 133.41, 133.36, 129.9, 129.8, 129.7, 129.1, 128.6, 128.5, 128.4, 97.0, 77.4, 74.2, 72.6, 71.9, 68.9, 63.2, 62.0, 55.5; HRMS (ESI)  $m/z$  calcd for  $\text{C}_{30}\text{H}_{34}\text{NO}_{10}$   $[\text{M}+\text{NH}_4]^+$  568.2177, found 568.2169.

**Methyl 2,3,6-tri-*O*-benzoyl-4-*O*-{2-[(1,3-dioxoisindolin-2-yl)oxy]ethyl}- $\alpha$ -*D*-glucopyranoside (1a)**

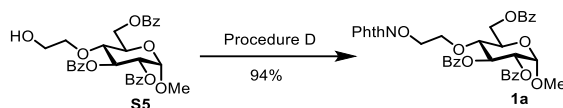

Following the general procedure D, **S5** (550.3 mg, 1.00 mmol, 1.0 equiv) was treated with  $\text{PPh}_3$  (520.0 mg, 2.00 mmol, 2.0 equiv), *N*-hydroxyphthalimide (320.0 mg, 2.00 mmol, 2.0 equiv) and diisopropylazodicarboxylate (400  $\mu\text{L}$ , 2.00 mmol, 2.0 equiv) in THF (6.0 mL) to give **1a** (653.0 mg, 936.0  $\mu\text{mol}$ , 94%) as a white foam after purification by silica gel column chromatography (PE:DCM:EA = 5:1:1).  $[\alpha]_{\text{D}}^{25} = +96.23$  ( $c$  2.3,  $\text{CHCl}_3$ );  $^1\text{H}$  NMR (400 MHz, Chloroform-*d*)  $\delta$  8.12–8.04 (m, 2H), 8.02–7.94 (m, 4H), 7.79–7.69 (m, 4H), 7.55 (t,  $J = 7.4$  Hz, 1H), 7.52–7.41 (m, 4H), 7.39–7.30 (m, 4H), 6.03 (t,  $J = 9.6$  Hz, 1H), 5.21–5.12 (m, 2H), 4.86–4.75 (m, 2H), 4.29–4.11 (m, 3H), 4.03–3.91 (m, 3H), 3.43 (s, 3H);  $^{13}\text{C}$  NMR (101 MHz, Chloroform-*d*)  $\delta$  166.3, 166.0, 165.5, 163.3, 134.4, 133.3, 133.2, 133.0, 130.0, 129.7, 129.6, 129.1, 128.9, 128.4, 123.5, 96.9, 77.9, 77.6, 72.8, 72.2, 70.3, 68.7, 63.3, 55.4; HRMS (ESI)  $m/z$  calcd for  $\text{C}_{38}\text{H}_{37}\text{N}_2\text{O}_{12}$   $[\text{M}+\text{NH}_4]^+$  713.2341, found 713.2340.

## Preparation of 1b via intermediate S7

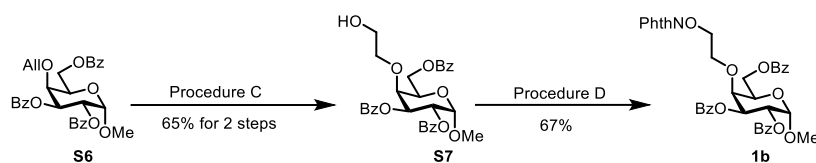

## Methyl 2,3,6-tri-O-benzoyl-4-O-(2-hydroxyethyl)- $\alpha$ -D-galactopyranoside (S7)

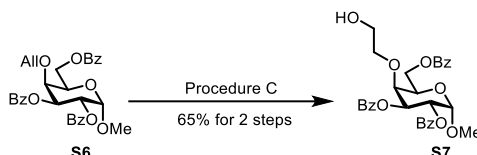

Following the general procedure C, **S6**<sup>[31]</sup> (1.11 g, 2.00 mmol, 1.0 equiv) was treated with 2,6-lutidine (470  $\mu$ L, 4.00 mmol, 2.0 equiv), OsO<sub>4</sub> (0.0234 mol/L solution in *t*-BuOH, 1.7 mL, 40.0  $\mu$ mol, 0.02 equiv) and NaIO<sub>4</sub> (1.28 g, 6.00 mmol, 3.0 equiv) in 1,4-dioxane/H<sub>2</sub>O (16.0 mL, *v/v* = 3:1) to give the aldehyde. The aldehyde was treated with NaBH<sub>4</sub> (151.3 mg, 4.00 mmol, 2.0 equiv) in MeOH (10.0 mL) to give **S7** (714.5 mg, 1.30 mmol, 65%) as a white foam after purification by silica gel column chromatography (PE:EA = 3:1).  $[\alpha]_D^{25} = +104.30$  (*c* 3.0, CHCl<sub>3</sub>); <sup>1</sup>H NMR (400 MHz, Chloroform-*d*)  $\delta$  8.09–7.95 (m, 6H), 7.58 (t, *J* = 7.4 Hz, 1H), 7.54–7.43 (m, 4H), 7.41–7.32 (m, 4H), 5.82 (dd, *J* = 10.8, 3.0 Hz, 1H), 5.72 (dd, *J* = 10.8, 3.6 Hz, 1H), 5.21 (d, *J* = 3.5 Hz, 1H), 4.65–4.59 (m, 2H), 4.38 (t, *J* = 6.5 Hz, 1H), 4.20 (d, *J* = 2.1 Hz, 1H), 3.93–3.85 (m, 1H), 3.78–3.73 (m, 2H), 3.72–3.65 (m, 1H), 3.44 (s, 3H), 2.51 (s, 1H); <sup>13</sup>C NMR (101 MHz, Chloroform-*d*)  $\delta$  166.2, 166.1, 166.0, 133.5, 133.4, 133.3, 129.9, 129.8, 129.7, 129.6, 129.4, 129.2, 128.6, 128.4, 97.6, 76.7, 75.2, 71.1, 69.3, 68.1, 63.0, 62.2, 55.6; HRMS (ESI) *m/z* calcd for C<sub>30</sub>H<sub>34</sub>NO<sub>10</sub> [M+NH<sub>4</sub>]<sup>+</sup> 568.2177, found 568.2185.

## Methyl 2,3,6-tri-O-benzoyl-4-O-{2-[(1,3-dioxisoindolin-2-yl)oxy]ethyl}- $\alpha$ -D-galactopyranoside (1b)

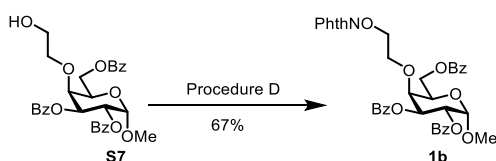

Following the general procedure D, **S7** (624.5 mg, 1.13 mmol, 1.0 equiv) was treated

with PPh<sub>3</sub> (356.7 mg, 1.36 mmol, 1.2 equiv), *N*-hydroxyphthalimide (221.6 mg, 1.36 mmol, 1.2 equiv) and diisopropylazodicarboxylate (271 μL, 1.36 mmol, 1.2 equiv) in THF (10.0 mL) to give **1b** (527.3 mg, 758.0 μmol, 67%) as a white foam after purification by silica gel column chromatography (PE:EA = 2:1).  $[\alpha]_D^{25} = +87.97$  (*c* 1.5, CHCl<sub>3</sub>); <sup>1</sup>H NMR (400 MHz, Chloroform-*d*) δ 8.08–8.01 (m, 4H), 7.99–7.94 (m, 2H), 7.84–7.79 (m, 2H), 7.75–7.70 (m, 2H), 7.56–7.46 (m, 3H), 7.44–7.32 (m, 6H), 5.83 (dd, *J* = 10.7, 2.9 Hz, 1H), 5.62 (dd, *J* = 10.7, 3.6 Hz, 1H), 5.12 (d, *J* = 3.6 Hz, 1H), 4.76 (dd, *J* = 11.4, 5.7 Hz, 1H), 4.67 (dd, *J* = 11.4, 7.0 Hz, 1H), 4.48–4.41 (m, 1H), 4.39–4.23 (m, 4H), 3.95–3.84 (m, 1H), 3.40 (s, 3H); <sup>13</sup>C NMR (101 MHz, Chloroform-*d*) δ 166.2, 166.0, 165.8, 163.5, 134.5, 133.4, 133.2, 133.1, 129.9, 129.8, 129.7, 129.5, 129.3, 128.9, 128.6, 128.5, 128.4, 123.6, 97.4, 71.6, 71.3, 69.5, 68.4, 63.5, 55.4; HRMS (ESI) *m/z* calcd for C<sub>38</sub>H<sub>37</sub>N<sub>2</sub>O<sub>12</sub> [M+NH<sub>4</sub>]<sup>+</sup> 713.2341, found 713.2360.

### Preparation of **1c–1e** via intermediates **S9–S11**

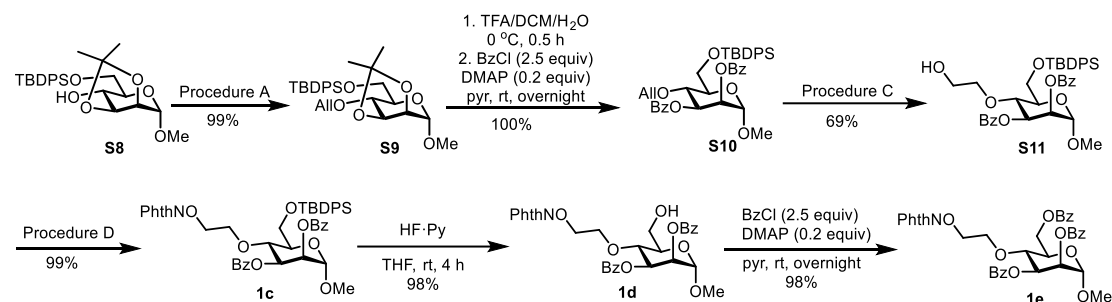

### Methyl 4-*O*-allyl-6-*O*-*tert*-butyldiphenylsilyl-2,3-*O*-isopropylidene- $\alpha$ -D-mannopyranoside (**S9**)

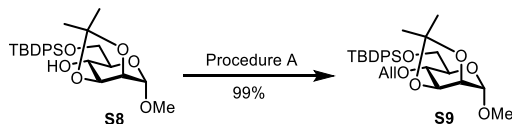

Following the general procedure A, **S8**<sup>[4]</sup> (9.42 g, 18.37 mmol, 1.0 equiv) was treated with AllBr (2.4 mL, 27.56 mmol, 1.5 equiv) and 60% dispersion of NaH in mineral oil (1.12 g, 27.56 mmol, 1.5 equiv) in DMF (50.0 mL) to give **S9** (9.31 g, 18.16 mmol, 99%) as a colorless oil after purification by silica gel column chromatography (PE:EA = 25:1).  $[\alpha]_D^{25} = +10.42$  (*c* 4.5, CHCl<sub>3</sub>); <sup>1</sup>H NMR (400 MHz, Chloroform-*d*) δ 7.79–7.69 (m, 4H), 7.46–7.33 (m, 6H), 5.92–5.74 (m, 1H), 5.25–5.16 (m, 1H), 5.14–5.04 (m, 1H),

4.94 (s, 1H), 4.38–4.26 (m, 1H), 4.24 (t,  $J = 6.0$  Hz, 1H), 4.12 (d,  $J = 5.8$  Hz, 1H), 4.06 (dd,  $J = 12.7, 5.8$  Hz, 1H), 3.96–3.84 (m, 2H), 3.66–3.53 (m, 2H), 3.37 (s, 3H), 1.53 (s, 3H), 1.36 (s, 3H), 1.06 (s, 9H);  $^{13}\text{C}$  NMR (101 MHz, Chloroform- $d$ )  $\delta$  136.0, 135.8, 135.1, 133.9, 133.5, 129.7, 127.8, 127.7, 116.9, 109.4, 98.3, 79.0, 76.0, 75.5, 72.1, 69.7, 63.3, 54.8, 28.1, 26.9, 26.5, 19.5; HRMS (ESI)  $m/z$  calcd for  $\text{C}_{29}\text{H}_{44}\text{NO}_6\text{Si}$   $[\text{M}+\text{NH}_4]^+$  530.2932, found 530.2928.

### Methyl 4-*O*-allyl-2,3-di-*O*-benzoyl-6-*O*-*tert*-butyldiphenylsilyl- $\alpha$ -D-mannopyranoside (**S10**)

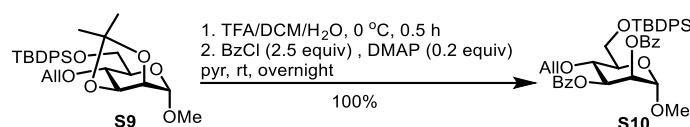

To a solution of **S9** (9.30 g, 18.10 mmol, 1.0 equiv) in DCM/TFA/ $\text{H}_2\text{O}$  (111.0 mL,  $v/v/v=100/10/1$ ) in ice bath under an argon atmosphere. The resultant solution was stirred for 30 min in ice bath. The reaction was quenched with saturated  $\text{NaHCO}_3$  solution in ice bath. The resultant mixture was extracted with DCM, and the organic layer was washed with brine. The organic layer was collected, dried over  $\text{Na}_2\text{SO}_4$ , filtered off the solid and concentrated *in vacuo* to give the crude product without further purification for next step. The crude product was dissolved in dry pyridine (60.0 mL),  $\text{BzCl}$  (5.3 mL, 45.25 mmol, 2.5 equiv) and 4-*N,N*-dimethylaminopyridine (DMAP) (442.0 mg, 3.62 mmol, 0.2 equiv) were added in ice bath under an argon atmosphere. The resultant solution was stirred for 12 h at room temperature. The reaction mixture was quenched with MeOH and concentrated *in vacuo*. The resulting residue was diluted with DCM and then washed sequentially with 1 M HCl solution, saturated  $\text{NaHCO}_3$  solution and brine. The organic layer was collected, dried over  $\text{Na}_2\text{SO}_4$ , filtered off the solid and concentrated *in vacuo*. The resulting residue was purified by silica gel column chromatography (PE:EA = 1:1) to afford **S10** (12.31 g, 18.08 mmol, 100%) as a colorless oil.  $[\alpha]_{\text{D}}^{25} = -51.80$  ( $c$  2.8,  $\text{CHCl}_3$ );  $^1\text{H}$  NMR (400 MHz, Chloroform- $d$ )  $\delta$  8.10–8.05 (m, 2H), 7.96–7.91 (m, 2H), 7.81–7.72 (m, 4H), 7.56 (t,  $J = 6.9$  Hz, 1H), 7.50 (t,  $J = 7.4$  Hz, 1H), 7.45–7.30 (m, 10H), 5.78–5.66 (m, 2H), 5.65–5.60 (m, 1H), 5.13–5.05

(m, 1H), 5.03–4.97 (m, 1H), 4.90 (d,  $J = 1.4$  Hz, 1H), 4.30 (t,  $J = 9.8$  Hz, 1H), 4.20–4.14 (m, 2H), 4.07 (dd,  $J = 11.3, 3.3$  Hz, 1H), 3.95 (dd,  $J = 11.3, 1.5$  Hz, 1H), 3.83 (d,  $J = 9.6$  Hz, 1H), 3.41 (s, 3H), 1.12 (s, 9H);  $^{13}\text{C}$  NMR (101 MHz, Chloroform-*d*)  $\delta$  165.7, 165.5, 136.1, 135.8, 134.8, 133.8, 133.4, 133.2, 133.1, 130.1, 130.0, 129.8, 128.6, 128.5, 127.9, 127.7, 116.9, 98.7, 73.9, 72.9, 72.8, 72.4, 71.1, 62.8, 55.1, 27.0, 19.5; HRMS (ESI)  $m/z$  calcd for  $\text{C}_{40}\text{H}_{44}\text{O}_8\text{SiNa}$   $[\text{M}+\text{Na}]^+$  703.2698, found 703.2698.

**Methyl 2,3-di-*O*-benzoyl-6-*O*-*tert*-butyldiphenylsilyl-4-*O*-(2-hydroxyethyl)- $\alpha$ -D-mannopyranoside (S11)**

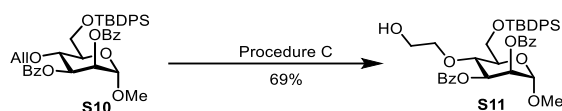

Following the general procedure C, **S10** (10.00 g, 14.70 mmol, 1.0 equiv) was treated with 2,6-lutidine (3.4 mL, 29.40 mmol, 2.0 equiv),  $\text{OsO}_4$  (0.0234 mol/L solution in *t*-BuOH, 12.5 mL, 294.0 mmol, 0.02 equiv) and  $\text{NaIO}_4$  (9.40 g, 44.10 mmol, 3.0 equiv) in 1,4-dioxane/ $\text{H}_2\text{O}$  (130.0 mL,  $v/v = 3:1$ ) to give the aldehyde. The aldehyde was treated with  $\text{NaBH}_4$  (834.0 mg, 22.05 mmol, 1.5 equiv) in MeOH (70.0 mL) to give **S11** (6.93 g, 10.11 mmol, 69%) as a white foam after purification by silica gel column chromatography (PE:EA = 6:1).  $[\alpha]_{\text{D}}^{25} = -59.20$  ( $c$  4.2,  $\text{CHCl}_3$ );  $^1\text{H}$  NMR (400 MHz, Chloroform-*d*)  $\delta$  8.14–8.07 (m, 2H), 7.99–7.90 (m, 2H), 7.83–7.74 (m, 4H), 7.60 (t,  $J = 7.4$  Hz, 1H), 7.52 (t,  $J = 7.4$  Hz, 1H), 7.45–7.33 (m, 10H), 5.73 (dd,  $J = 9.8, 3.4$  Hz, 1H), 5.66–5.60 (m, 1H), 4.92–4.89 (m, 1H), 4.29 (t,  $J = 9.8$  Hz, 1H), 4.09 (dd,  $J = 11.4, 3.3$  Hz, 1H), 3.99 (dd,  $J = 11.4, 1.4$  Hz, 1H), 3.84 (d,  $J = 9.6$  Hz, 1H), 3.78–3.71 (m, 2H), 3.57–3.48 (m, 2H), 3.42 (s, 3H), 2.07–1.99 (m, 1H), 1.14 (s, 9H);  $^{13}\text{C}$  NMR (101 MHz, Chloroform-*d*)  $\delta$  165.8, 165.6, 136.1, 135.7, 133.6, 133.5, 133.3, 133.0, 130.0, 129.9, 129.8, 129.7, 128.6, 128.5, 127.9, 127.7, 98.7, 74.2, 73.9, 72.6, 72.3, 71.0, 62.9, 62.2, 55.1, 27.0, 19.5; HRMS (ESI)  $m/z$  calcd for  $\text{C}_{39}\text{H}_{44}\text{O}_9\text{SiNa}$   $[\text{M}+\text{Na}]^+$  707.2647, found 707.2645.

**Methyl 2,3-di-*O*-benzoyl-6-*O*-*tert*-butyldiphenylsilyl-4-*O*-{2-[(1,3-dioxoisindolin-2-yl)oxy]ethyl}- $\alpha$ -D-mannopyranoside (1c)**

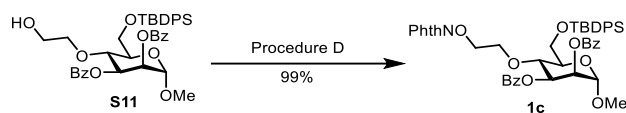

Following the general procedure D, **S11** (6.84 g, 10.00 mmol, 1.0 equiv) was treated with  $\text{PPh}_3$  (3.15 g, 12.00 mmol, 1.2 equiv), *N*-hydroxyphthalimide (1.96 g, 12.00 mmol, 1.2 equiv) and diisopropylazodicarboxylate (2.4 mL, 12.0 mmol, 1.2 equiv) in THF (50.0 mL) to give **1c** (8.20 g, 9.88 mmol, 99%) as a white foam after purification by silica gel column chromatography (PE:EA = 5:1).  $[\alpha]_{\text{D}}^{25} = -42.31$  (*c* 2.8,  $\text{CHCl}_3$ );  $^1\text{H}$  NMR (400 MHz, Chloroform-*d*)  $\delta$  8.11–8.02 (m, 2H), 7.96–7.90 (m, 2H), 7.81–7.68 (m, 8H), 7.56 (t,  $J = 7.4$  Hz, 1H), 7.46–7.37 (m, 3H), 7.36–7.27 (m, 8H), 5.65–5.60 (m, 2H), 4.89 (s, 1H), 4.31 (t,  $J = 9.4$  Hz, 1H), 4.23–4.12 (m, 3H), 4.11–4.04 (m, 1H), 4.03–3.94 (m, 2H), 3.78 (d,  $J = 9.6$  Hz, 1H), 3.39 (s, 3H), 1.11 (s, 9H);  $^{13}\text{C}$  NMR (101 MHz, Chloroform-*d*)  $\delta$  165.6, 165.4, 163.3, 136.1, 135.8, 134.4, 133.7, 133.4, 133.3, 133.0, 129.7, 128.9, 128.6, 128.4, 127.7, 127.6, 123.5, 98.6, 77.2, 74.2, 72.9, 72.1, 70.9, 70.8, 62.8, 55.0, 27.0, 19.5; HRMS (ESI)  $m/z$  calcd for  $\text{C}_{47}\text{H}_{51}\text{N}_2\text{O}_{11}\text{Si}$   $[\text{M}+\text{NH}_4]^+$  847.3257, found 847.3256.

### Methyl 2,3-di-*O*-benzoyl-4-*O*-{2-[(1,3-dioxoisindolin-2-yl)oxy]ethyl}- $\alpha$ -*D*-mannopyranoside (**1d**)

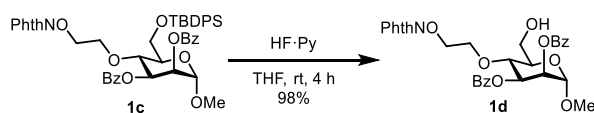

To a solution of **1c** (6.88 g, 8.30 mmol, 1.0 equiv) in THF (30.0 mL) was added  $\text{HF}\cdot\text{Py}$  (8.3 mL) in ice bath under an argon atmosphere. The resultant solution was stirred at room temperature for 4 h. The reaction was quenched with saturated  $\text{NaHCO}_3$  solution. The resultant mixture was extracted with DCM, and the organic layer was washed with 1 M HCl solution and brine. The organic layer was collected, dried over  $\text{Na}_2\text{SO}_4$ , filtered off the solid and concentrated *in vacuo*. The resulting residue was purified by silica gel column chromatography (PE:EA = 1:1) to afford **1d** (4.81 g, 8.13 mmol, 98%) as a white foam.  $[\alpha]_{\text{D}}^{25} = -21.52$  (*c* 4.1,  $\text{CHCl}_3$ );  $^1\text{H}$  NMR (400 MHz, Chloroform-*d*)  $\delta$  8.08–8.02 (m, 2H), 7.95–7.89 (m, 2H), 7.83–7.77 (m, 2H), 7.76–7.71 (m, 2H), 7.59 (t,  $J = 7.4$  Hz, 1H), 7.50–7.42 (m, 3H), 7.35–7.29 (m, 2H), 5.66 (dd,  $J = 9.6, 3.3$  Hz, 1H),

5.61 (dd,  $J = 3.3, 1.8$  Hz, 1H), 4.88 (d,  $J = 1.5$  Hz, 1H), 4.33–4.24 (m, 3H), 4.22–4.12 (m, 1H), 4.08–3.97 (m, 3H), 3.90–3.80 (m, 1H), 3.45 (s, 3H), 2.65 (s, 1H);  $^{13}\text{C}$  NMR (101 MHz, Chloroform-*d*)  $\delta$  165.5, 165.3, 163.6, 134.7, 133.5, 133.2, 129.9, 129.7, 129.6, 128.8, 128.6, 128.5, 123.7, 98.7, 77.9, 74.2, 73.0, 71.7, 70.7, 70.6, 61.6, 55.3; HRMS (ESI)  $m/z$  calcd for  $\text{C}_{31}\text{H}_{33}\text{N}_2\text{O}_{11}$   $[\text{M}+\text{NH}_4]^+$  609.2079, found 609.2068.

**Methyl 2,3,6-tri-*O*-benzoyl-4-*O*-{2-[(1,3-dioxoisindolin-2-yl)oxy]ethyl}- $\alpha$ -D-mannopyranoside (1e)**

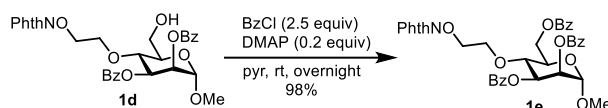

To a solution of **1d** (1.23 g, 2.08 mmol, 1.0 equiv) in dry pyridine (8.0 mL) was added BzCl (320  $\mu\text{L}$ , 2.70 mmol, 1.3 equiv) and DMAP (25.7 mg, 208.0  $\mu\text{mol}$ , 0.1 equiv) in ice bath under an argon atmosphere. The resultant solution was stirred at room temperature for 2 h. The resultant mixture was quenched with MeOH and washed with 1 M HCl solution and brine. The organic layer was collected, dried over  $\text{Na}_2\text{SO}_4$ , filtered off the solid and concentrated *in vacuo*. The resulting residue was purified by silica gel column chromatography (PE:EA = 1.5:1) to afford **1e** (1.43 g, 2.05 mmol, 98%) as a white foam.  $[\alpha]_{\text{D}}^{25} = +97.52$  ( $c$  0.8,  $\text{CHCl}_3$ );  $^1\text{H}$  NMR (400 MHz, Chloroform-*d*)  $\delta$  8.11–8.07 (m, 2H), 8.02–7.97 (m, 2H), 7.97–7.90 (m, 2H), 7.76–7.69 (m, 4H), 7.60–7.54 (m, 2H), 7.49–7.29 (m, 7H), 5.70 (dd,  $J = 9.5, 3.3$  Hz, 1H), 5.66–5.61 (m, 1H), 4.92–4.85 (m, 2H), 4.82–4.77 (m, 1H), 4.32–4.21 (m, 3H), 4.18–4.11 (m, 1H), 4.10–3.97 (m, 2H), 3.48 (s, 3H);  $^{13}\text{C}$  NMR (101 MHz, Chloroform-*d*)  $\delta$  166.3, 165.4, 165.3, 163.4, 134.5, 133.4, 133.2, 133.1, 130.0, 129.9, 129.81, 129.78, 128.6, 128.5, 123.6, 98.7, 74.8, 72.9, 70.7, 69.9, 55.4; HRMS (ESI)  $m/z$  calcd for  $\text{C}_{38}\text{H}_{37}\text{N}_2\text{O}_{12}$   $[\text{M}+\text{NH}_4]^+$  713.2341, found 713.2347.

**Preparation of 1f via intermediates S13–S15**



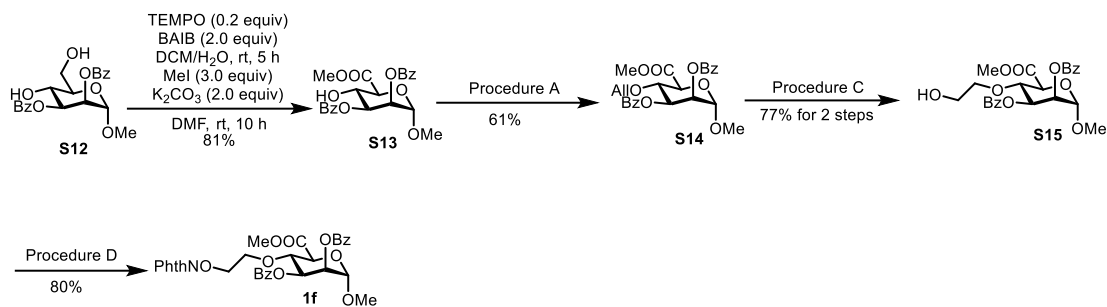

### Methyl [methyl 2,3-di-*O*-benzoyl- $\alpha$ -D-mannopyranosyluronate] (S13)

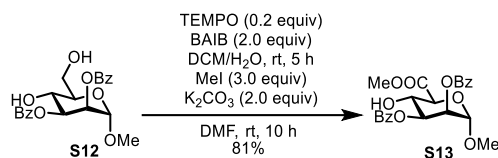

To a solution of **S12**<sup>[5]</sup> (402.3 mg, 1.00 mmol, 1.0 equiv) in DCM/H<sub>2</sub>O (11 mL, *v/v* = 10:1) were added 2,2,6,6-tetramethyl-1-piperidinyloxy (TEMPO) (31.2 mg, 200.0  $\mu$ mol, 0.2 equiv) and PhI(OAc)<sub>2</sub> (644.2 mg, 2.00 mmol, 2.0 equiv) under an argon atmosphere. After stirring for 5 h at room temperature, the reaction was diluted with DCM and washed with Na<sub>2</sub>S<sub>2</sub>O<sub>3</sub> solution and brine. The organic layer was collected, dried over Na<sub>2</sub>SO<sub>4</sub>, filtered off the solid, and concentrated *in vacuo*. To a solution of the crude product obtained as above in DMF (10.0 mL) while chilled in an ice bath were added K<sub>2</sub>CO<sub>3</sub> (262.4 mg, 2.00 mmol, 2.0 equiv) and MeI (185  $\mu$ L, 3.00 mmol, 3.0 equiv) under an argon atmosphere. After stirring for 10 h at room temperature, the reaction was quenched with water and concentrated to dryness. The resulting residue was purified by silica gel column chromatography (PE:EA = 2:1) to afford **S13** (350.3 mg, 813.9  $\mu$ mol, 81%) a white foam.  $[\alpha]_D^{25} = -55.14$  (*c* 1.1, CHCl<sub>3</sub>); <sup>1</sup>H NMR (400 MHz, Chloroform-*d*)  $\delta$  8.10–8.02 (m, 2H), 7.99–7.89 (m, 2H), 7.65–7.52 (m, 1H), 7.54–7.42 (m, 3H), 7.39–7.30 (m, 2H), 5.64 (dd, *J* = 9.7, 3.4 Hz, 1H), 5.59–5.52 (m, 1H), 5.00 (d, *J* = 1.5 Hz, 1H), 4.57–4.42 (m, 1H), 4.37 (d, *J* = 9.6 Hz, 1H), 3.88 (s, 3H), 3.53 (s, 3H), 3.25 (d, *J* = 3.5 Hz, 1H); <sup>13</sup>C NMR (101 MHz, Chloroform-*d*)  $\delta$  170.4, 165.9, 165.4, 133.5, 133.2, 129.8, 129.7, 129.3, 129.2, 128.5, 128.3, 99.0, 71.2, 69.9, 67.3, 55.7, 52.8; HRMS (ESI) *m/z* calcd for C<sub>22</sub>H<sub>23</sub>O<sub>9</sub> [M+H]<sup>+</sup> 431.1337, found 431.1329.

### Methyl [methyl 4-*O*-allyl-2,3-di-*O*-benzoyl- $\alpha$ -D-mannopyranosyluronate] (S14)

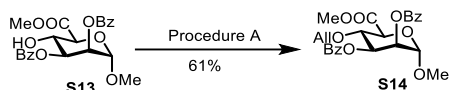

Following the general procedure B, **S13** (1.18 g, 2.70 mmol, 1.0 equiv) was treated with 2,4,6-tris(allyloxy)-1,3,5-triazine (3.0 mL, 13.50 mmol, 5.0 equiv) and TfOH (86  $\mu$ L, 1.08 mmol, 0.4 equiv) in 1,4-dioxane (10.0 mL) to give **S14** (771.3 mg, 1.64 mmol, 61%) as a white foam after purification by silica gel column chromatography (PE:EA = 2:1).  $[\alpha]_D^{25} = -59.10$  (*c* 0.6, CHCl<sub>3</sub>); <sup>1</sup>H NMR (400 MHz, Chloroform-*d*)  $\delta$  8.09–7.99 (m, 2H), 7.99–7.89 (m, 2H), 7.60 (t, *J* = 6.9 Hz, 1H), 7.53 (t, *J* = 7.4 Hz, 1H), 7.49–7.44 (m, 2H), 7.42–7.34 (m, 2H), 5.83–5.72 (m, 1H), 5.69 (dd, *J* = 9.0, 3.4 Hz, 1H), 5.62–5.56 (m, 1H), 5.20–5.13 (m, 1H), 5.11–5.04 (m, 1H), 5.01 (d, *J* = 2.4 Hz, 1H), 4.40 (d, *J* = 8.9 Hz, 1H), 4.29 (t, *J* = 8.9 Hz, 1H), 4.15 (d, *J* = 5.7 Hz, 2H), 3.81 (s, 3H), 3.52 (s, 3H); <sup>13</sup>C NMR (101 MHz, CDCl<sub>3</sub>)  $\delta$  169.7, 165.5, 165.3, 134.2, 133.5, 133.4, 130.0, 129.8, 129.6, 129.5, 128.6, 128.5, 117.5, 99.0, 74.5, 73.7, 71.6, 71.4, 70.2, 55.9, 52.7; HRMS (ESI) *m/z* calcd for C<sub>25</sub>H<sub>27</sub>O<sub>9</sub> [M+H]<sup>+</sup> 471.1650, found 471.1643.

### Methyl [methyl 2,3-di-*O*-benzoyl-4-*O*-(2-hydroxyethyl)- $\alpha$ -D-mannopyranosyluronate] (S15)

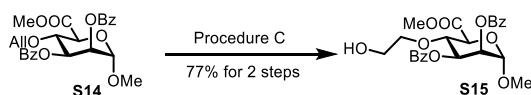

Following the general procedure C, **S14** (921.3 mg, 1.75 mmol, 1.0 equiv) was treated with 2,6-lutidine (410  $\mu$ L, 3.50 mmol, 2.0 equiv), OsO<sub>4</sub> (0.0234 mol/L solution in *t*-BuOH, 1.5 mL, 35.0  $\mu$ mol, 0.02 equiv) and NaIO<sub>4</sub> (1.49 g, 7.02 mmol, 4.0 equiv) in 1,4-dioxane/H<sub>2</sub>O (12.0 mL, *v/v* = 3:1) to give the aldehyde. The aldehyde was treated with NaBH<sub>4</sub> (198.0 mg, 5.25 mmol, 3.0 equiv) in MeOH (10.0 mL) to give **S15** (638.9 mg, 1.35 mmol, 77%) as a colorless oil after purification by silica gel column chromatography (PE:EA = 1.3:1).  $[\alpha]_D^{25} = -64.99$  (*c* 1.2, CHCl<sub>3</sub>); <sup>1</sup>H NMR (400 MHz, Chloroform-*d*)  $\delta$  8.11–7.99 (m, 2H), 7.97–7.87 (m, 2H), 7.65–7.57 (m, 1H), 7.53 (t, *J* = 7.4 Hz, 1H), 7.51–7.45 (m, 2H), 7.42–7.33 (m, 2H), 5.70 (dd, *J* = 9.2, 3.4 Hz, 1H), 5.62–5.54 (m, 1H), 4.99 (d, *J* = 2.2 Hz, 1H), 4.40 (d, *J* = 9.2 Hz, 1H), 4.27 (t, *J* = 9.2

Hz, 1H), 3.85 (s, 3H), 3.81–3.70 (m, 2H), 3.68–3.56 (m, 2H), 3.53 (s, 3H), 2.36 (brs, 1H); <sup>13</sup>C NMR (101 MHz, Chloroform-*d*) δ 169.9, 165.5, 165.4, 133.7, 133.5, 130.0, 129.8, 129.4, 128.7, 128.6, 99.1, 75.4, 74.5, 71.8, 71.0, 70.2, 62.1, 56.0, 53.0; HRMS (ESI) *m/z* calcd for C<sub>24</sub>H<sub>30</sub>NO<sub>10</sub> [M+NH<sub>4</sub>]<sup>+</sup> 492.1864, found 492.1859.

**Methyl (methyl 2,3-di-*O*-benzoyl-4-*O*-{2-[(1,3-dioxoisindolin-2-yl)oxy]ethyl}- $\alpha$ -D-mannopyranosyluronate) (1f)**

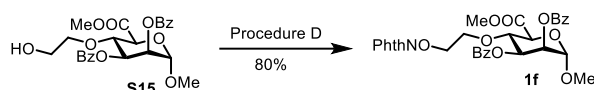

Following the general procedure D, **S15** (140.0 mg, 295.0  $\mu$ mol, 1.0 equiv) was treated with PPh<sub>3</sub> (93.0 mg, 354.0  $\mu$ mol, 1.2 equiv), *N*-hydroxyphthalimide (57.7 mg, 354.0  $\mu$ mol, 1.2 equiv) and diisopropylazodicarboxylate (70  $\mu$ L, 354.0  $\mu$ mol, 1.2 equiv) in THF (5.0 mL) to give **1f** (147.3 mg, 237.7  $\mu$ mol, 80%) as a white foam after purification by silica gel column chromatography (PE:EA = 2:1).  $[\alpha]_D^{25} = -50.21$  (*c* 0.7, CHCl<sub>3</sub>); <sup>1</sup>H NMR (400 MHz, Chloroform-*d*) δ 8.05–7.99 (m, 2H), 7.98–7.89 (m, 2H), 7.80–7.75 (m, 2H), 7.74–7.70 (m, 2H), 7.64–7.54 (m, 1H), 7.50–7.40 (m, 3H), 7.35–7.28 (m, 2H), 5.64–5.59 (m, 1H), 5.59–5.55 (m, 1H), 4.97 (d, *J* = 2.4 Hz, 1H), 4.38–4.29 (m, 2H), 4.28–4.17 (m, 2H), 4.11–3.97 (m, 2H), 3.83 (s, 3H), 3.49 (s, 3H); <sup>13</sup>C NMR (101 MHz, Chloroform-*d*) δ 169.6, 165.5, 165.2, 163.4, 134.5, 133.5, 133.2, 130.0, 129.8, 129.6, 129.5, 129.0, 128.6, 128.5, 123.6, 98.9, 75.8, 71.7, 71.1, 70.7, 70.0, 55.9, 52.8; HRMS (ESI) *m/z* calcd for C<sub>32</sub>H<sub>33</sub>N<sub>2</sub>O<sub>12</sub> [M+NH<sub>4</sub>]<sup>+</sup> 637.2028, found 637.2032.

**Methyl 2,3-di-*O*-benzoyl-4-*O*-{2-[(1,3-dioxoisindolin-2-yl)oxy]ethyl}-6-*O*-{3 $\alpha$ -acetyloxy-5 $\beta$ -cholan-24-oate}- $\alpha$ -D-mannopyranoside (1g)**

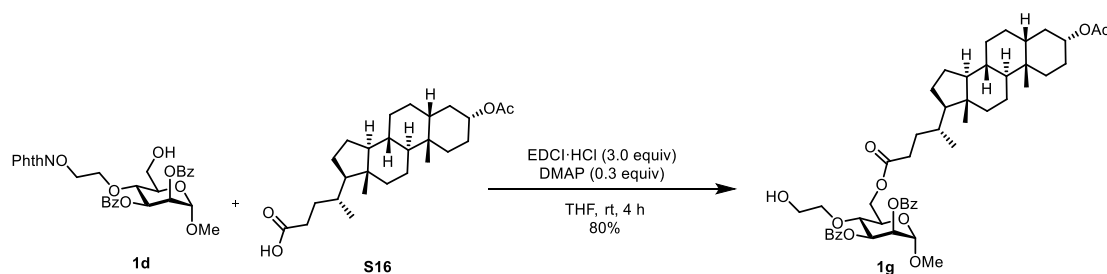

To a solution of **1d** (591.6 mg, 1.00 mmol, 1.0 equiv) and lithocholic (**S16**) (591.6 mg,

3.00 mmol, 3.0 equiv) in THF (30.0 mL) were added 1-(3-dimethylaminopropyl)-3-ethylcarbodiimide hydrochloride (EDCI·HCl) (575.1 mg, 3.00 mmol, 3.0 equiv) and DMAP (36.7 mg, 0.3 mmol, 0.3 equiv) in ice bath under an argon atmosphere. The resultant solution was stirred at room temperature for 4 h. The resultant mixture was diluted with DCM and washed with NaHCO<sub>3</sub> solution and brine. The organic layer was collected, dried over Na<sub>2</sub>SO<sub>4</sub>, filtered off the solid and concentrated *in vacuo*. The resulting residue was purified by silica gel column chromatography (PE:EA = 2:1) to afford **1g** (793.7 mg, 800.0 μmmol, 80%) as a white foam.  $[\alpha]_D^{25} = +39.83$  (*c* 2.4, CHCl<sub>3</sub>); <sup>1</sup>H NMR (400 MHz, Chloroform-*d*) δ 8.10–8.02 (m, 1H), 7.95–7.88 (m, 1H), 7.80–7.71 (m, 3H), 7.60 (t, *J* = 7.4 Hz, 1H), 7.51–7.41 (m, 2H), 7.35–7.28 (m, 2H), 5.65 (dd, *J* = 9.4, 3.3 Hz, 1H), 5.61–5.57 (m, 1H), 4.88 (d, *J* = 1.6 Hz, 1H), 4.77–4.67 (m, 1H), 4.63–4.49 (m, 1H), 4.29–4.19 (m, 2H), 4.13 (t, *J* = 9.6 Hz, 1H), 4.09–3.99 (m, 2H), 3.99–3.89 (m, 1H), 3.46 (s, 2H), 2.53–2.41 (m, 1H), 2.39–2.28 (m, 1H), 2.03 (s, 2H), 2.00–1.91 (m, 1H), 1.89–1.75 (m, 5H), 1.73–1.66 (m, 1H), 1.60–1.49 (m, 2H), 1.49–1.31 (m, 6H), 1.30–1.20 (m, 2H), 1.20–0.94 (m, 5H), 0.93 (s, 3H), 0.63 (s, 3H); <sup>13</sup>C NMR (101 MHz, Chloroform-*d*) δ 174.0, 170.7, 165.3, 165.2, 163.3, 134.5, 133.4, 133.1, 129.8, 129.7, 129.6, 128.9, 128.5, 128.4, 123.5, 98.5, 77.5, 74.8, 74.4, 72.7, 70.6, 70.5, 69.6, 63.0, 56.5, 56.0, 55.2, 42.7, 41.9, 40.5, 40.2, 35.8, 35.3, 35.1, 34.6, 32.3, 31.1, 30.9, 28.2, 27.0, 26.7, 26.3, 24.2, 23.3, 21.5, 20.9, 18.3, 12.1; HRMS (ESI) *m/z* calcd for C<sub>57</sub>H<sub>69</sub>NO<sub>14</sub>Na [M+NH<sub>4</sub>]<sup>+</sup> 1014.4610, found 1014.4626.

**Methyl 2,3-di-*O*-benzoyl-4-*O*-{2-[(1,3-dioxoisindolin-2-yl)oxy]ethyl}-6-*O*-{4-(*N,N*-dipropylsulfamoyl)benzoyl}- $\alpha$ -D-mannopyranoside (**1h**)**

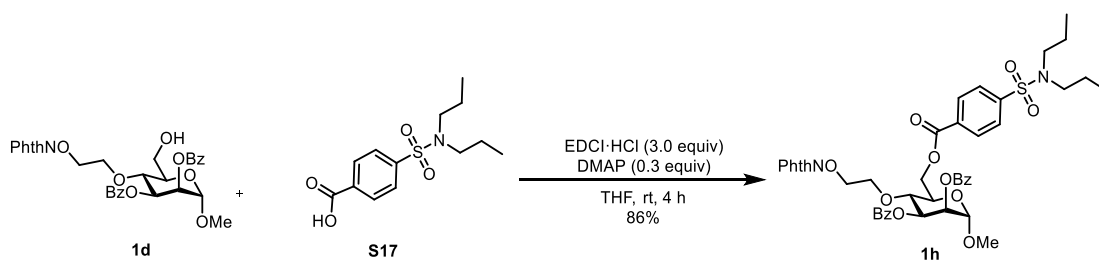

To a solution of **1d** (591.6 mg, 1.00 mmol, 1.0 equiv) and probenecid (**S17**) (855.8 mg, 3.00 mmol, 3.0 equiv) in THF (30.0 mL) were added EDCI·HCl (575.1 mg, 3.00 mmol,

3.0 equiv) and DMAP (36.7 mg, 0.3 mmol, 0.3 equiv) in ice bath under an argon atmosphere. The resultant solution was stirred at room temperature for 4 h. The resultant mixture was diluted with DCM and washed with NaHCO<sub>3</sub> solution and brine. The organic layer was collected, dried over Na<sub>2</sub>SO<sub>4</sub>, filtered off the solid and concentrated *in vacuo*. The resulting residue was purified by silica gel column chromatography (PE:EA = 2:1) to afford **1h** (734.6 mg, 855.3 μmol, 86%) as a white foam.  $[\alpha]_D^{25} = +11.44$  (*c* 1.0, CHCl<sub>3</sub>); <sup>1</sup>H NMR (400 MHz, Chloroform-*d*) δ 8.20–8.15 (m, 2H), 8.05–8.00 (m, 2H), 7.97–7.93 (m, 2H), 7.83–7.78 (m, 2H), 7.78–7.69 (m, 4H), 7.63 (t, *J* = 7.5 Hz, 1H), 7.48 (t, *J* = 7.4 Hz, 1H), 7.44–7.38 (m, 2H), 7.36–7.30 (m, 2H), 5.72 (dd, *J* = 9.5, 3.3 Hz, 1H), 5.65–5.56 (m, 1H), 4.96–4.89 (m, 2H), 4.86–4.79 (m, 1H), 4.37–4.25 (m, 2H), 4.24–4.14 (m, 2H), 4.08–3.99 (m, 2H), 3.49 (s, 3H), 3.14–3.06 (m, 4H), 1.61–1.50 (m, 4H), 0.92–0.84 (m, 6H); <sup>13</sup>C NMR (101 MHz, Chloroform-*d*) δ 165.5, 165.3, 165.0, 163.4, 144.3, 134.6, 133.6, 133.3, 130.3, 129.8, 129.7, 129.6, 128.8, 128.7, 128.5, 127.1, 123.6, 98.6, 77.9, 74.8, 72.8, 70.83, 70.76, 69.7, 64.0, 55.5, 50.1, 22.1, 11.3; HRMS (ESI) *m/z* calcd for C<sub>44</sub>H<sub>50</sub>N<sub>3</sub>O<sub>14</sub>S [M+NH<sub>4</sub>]<sup>+</sup> 876.3008, found 876.3003.

**Methyl 2,3-di-*O*-benzoyl-4-*O*-{2-[(1,3-dioxisoindolin-2-yl)oxy]ethyl}-6-*O*-{(*S*)-2-(6-methoxynaphthalen-2-yl)propanoyl}- $\alpha$ -D-mannopyranoside (**1i**)**

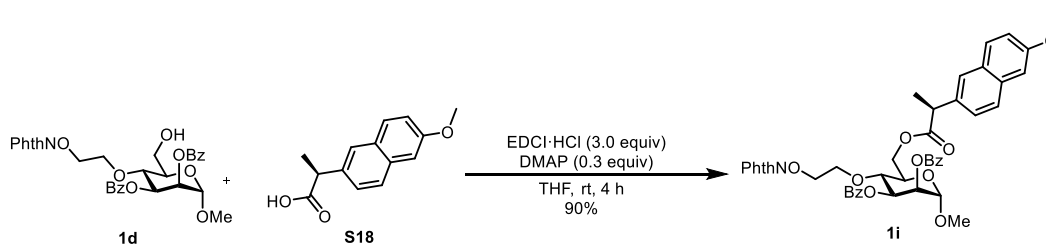

To a solution of **1d** (591.6 mg, 1.00 mmol, 1.0 equiv) and (*S*)-(+)-Naproxen (**S18**) (690.8, 3.00 mmol, 3.0 equiv) in THF (30.0 mL) were added EDCI·HCl (575.1 mg, 3.00 mmol, 3.0 equiv) and DMAP (36.7 mg, 0.3 mmol, 0.3 equiv) in ice bath under an argon atmosphere. The resultant solution was stirred at room temperature for 4 h. The resultant mixture was diluted with DCM and washed with NaHCO<sub>3</sub> solution and brine. The organic layer was collected, dried over Na<sub>2</sub>SO<sub>4</sub>, filtered off the solid and concentrated *in vacuo*. The resulting residue was purified by silica gel column

chromatography (PE:EA = 2:1) to afford **1i** (724.1 mg, 900.8  $\mu$ mmol, 90%) as a white foam.  $[\alpha]_D^{25} = -66.83$  ( $c$  1.0,  $\text{CHCl}_3$ );  $^1\text{H NMR}$  (400 MHz, Chloroform- $d$ )  $\delta$  8.17–8.10 (m, 2H), 7.79–7.61 (m, 8H), 7.60–7.52 (m, 3H), 7.47 (t,  $J = 7.4$  Hz, 1H), 7.42–7.36 (m, 2H), 7.34–7.28 (m, 2H), 7.05–6.99 (m, 2H), 5.61–5.56 (m, 1H), 5.46 (dd,  $J = 9.6, 3.4$  Hz, 1H), 4.82 (d,  $J = 1.5$  Hz, 1H), 4.59 (dd,  $J = 12.1, 3.6$  Hz, 1H), 4.42 (dd,  $J = 12.1, 1.4$  Hz, 1H), 4.01–3.94 (m, 1H), 3.91 (d,  $J = 9.9$  Hz, 1H), 3.86 (s, 3H), 3.81 (t,  $J = 9.7$  Hz, 1H), 3.75–3.71 (m, 2H), 3.29 (s, 3H), 3.27–3.20 (m, 1H), 2.95–2.70 (m, 1H), 1.61 (d,  $J = 7.1$  Hz, 3H);  $^{13}\text{C NMR}$  (101 MHz, Chloroform- $d$ )  $\delta$  174.0, 165.3, 165.0, 163.2, 157.7, 135.9, 134.4, 133.7, 133.6, 133.1, 129.9, 129.8, 129.7, 129.5, 129.1, 128.9, 128.8, 128.6, 128.3, 127.2, 126.4, 126.2, 123.4, 119.2, 105.4, 98.7, 77.1, 74.0, 72.6, 70.4, 70.1, 69.3, 63.4, 55.3, 55.1, 45.5, 17.8; HRMS (ESI)  $m/z$  calcd for  $\text{C}_{45}\text{H}_{41}\text{NO}_{13}\text{Na}$   $[\text{M}+\text{Na}]^+$  826.2470, found 826.2477.

### Preparation of **1j** via intermediate **S20**

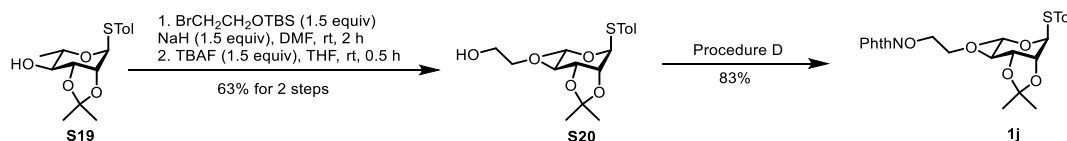

### *p*-Tolyl 4-*O*-(2-hydroxyethyl)-2,3-*O*-isopropylidene-1-thio- $\alpha$ -L-rhamnopyranoside (**S20**)

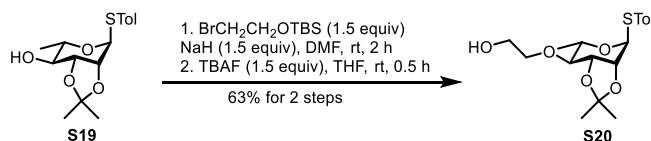

To a solution of **S19**<sup>[4]</sup> (1.55 g, 5.00 mmol, 1.0 equiv) in DMF (20.0 mL) were added (2-bromoethoxy)-*tert*-butyldimethylsilane (1.6 mL, 7.50 mmol, 1.5 equiv) and 60% dispersion of NaH in mineral oil (300.0 mg, 7.50 mmol, 1.5 equiv) in ice bath under an argon atmosphere. The resultant solution was stirred at room temperature for 3 h. The reaction was quenched with  $\text{NH}_4\text{Cl}$  solution at 0 °C. The resultant mixture was extracted with DCM, and the organic layer was washed with brine. The organic layer was collected, dried over  $\text{Na}_2\text{SO}_4$ , filtered off the solid and concentrated *in vacuo* to

give the crude product without further purification for next step. To a solution of the crude product obtained as above in THF (10.0 mL) was added TBAF (1 mol/L in THF, 7.5 mL, 7.50 mmol, 1.5 equiv) under an argon atmosphere. After stirring for 0.5 h at room temperature, the reaction mixture was extracted with DCM, and the organic layer was washed with brine. The organic layer was collected, dried over Na<sub>2</sub>SO<sub>4</sub>, filtered off the solid and concentrated *in vacuo*. The resulting residue was purified by silica gel column chromatography (PE:EA = 4:1) to afford **S20** (1.12 g, 3.16 mmol, 63%) as a colorless oil.  $[\alpha]_{\text{D}}^{25} = -96.27$  (*c* 1.3, CHCl<sub>3</sub>); <sup>1</sup>H NMR (400 MHz, Chloroform-*d*) δ 7.40–7.32 (m, 2H), 7.20–7.08 (m, 2H), 5.66 (s, 1H), 4.34 (d, *J* = 5.6 Hz, 1H), 4.26–4.17 (m, 1H), 4.17–4.02 (m, 1H), 3.84–3.77 (m, 2H), 3.74 (d, *J* = 4.0 Hz, 2H), 3.34–3.15 (m, 1H), 2.75 (brs, 1H), 2.33 (s, 3H), 1.55 (s, 3H), 1.37 (s, 3H), 1.24 (d, *J* = 6.3 Hz, 3H); <sup>13</sup>C NMR (101 MHz, Chloroform-*d*) δ 138.0, 132.6, 130.0, 129.6, 109.7, 84.1, 83.5, 78.0, 76.7, 73.8, 66.5, 62.4, 28.0, 26.4, 21.2, 17.6; HRMS (ESI) *m/z* calcd for C<sub>18</sub>H<sub>26</sub>O<sub>5</sub>NaS [M+Na]<sup>+</sup> 377.1393, found 377.1389.

***p*-Tolyl 4-*O*-{2-[(1,3-dioxoisindolin-2-yl)oxy]ethyl}-2,3-*O*-isopropylidene-1-thio- $\alpha$ -L-rhamnopyranoside (**1j**)**

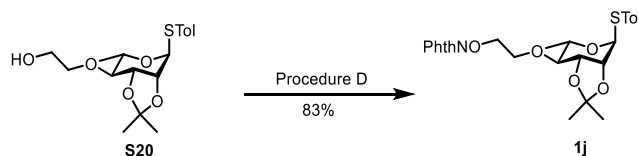

Following the general procedure D, **S20** (900.0 mg, 2.54 mmol, 1.0 equiv) was treated with PPh<sub>3</sub> (800.0 mg, 3.05 mmol, 1.2 equiv), *N*-hydroxyphthalimide (497.5 mg, 3.05 mmol, 1.2 equiv) and diisopropylazodicarboxylate (600  $\mu$ L, 3.05 mmol, 1.2 equiv) in THF (10.0 mL) to give **1j** (1.05 g, 2.10 mmol, 83%) as a white foam after purification by silica gel column chromatography (PE:EA = 5:1).  $[\alpha]_{\text{D}}^{25} = -158.80$  (*c* 2.7, CHCl<sub>3</sub>); <sup>1</sup>H NMR (400 MHz, Chloroform-*d*) δ .90–7.78 (m, 2H), 7.78–7.70 (m, 2H), 7.34–7.30 (m, 2H), 7.15–7.07 (m, 2H), 5.61 (s, 1H), 4.47–4.34 (m, 2H), 4.29 (d, *J* = 5.7 Hz, 1H), 4.26–4.14 (m, 2H), 4.02–3.89 (m, 2H), 3.19 (dd, *J* = 9.7, 7.2 Hz, 1H), 2.32 (s, 3H), 1.51 (s, 3H), 1.32 (s, 3H), 1.18 (d, *J* = 6.2 Hz, 3H); <sup>13</sup>C NMR (101 MHz, Chloroform-*d*) δ 163.6, 137.9, 134.5, 132.6, 129.9, 129.7, 129.1, 123.6, 109.5, 84.2, 82.9, 77.7, 77.2,

76.6, 69.3, 66.0, 28.1, 26.5, 21.2, 17.5; HRMS (ESI)  $m/z$  calcd for  $C_{26}H_{33}N_2O_7S$   $[M+NH_4]^+$  517.2003, found 517.1993.

***p*-Tolyl 4-*O*-{2-[(1,3-dioxisoindolin-2-yl)oxy]ethyl}-1-thio- $\alpha$ -L-rhamno-  
pyranoside (**1k**)**

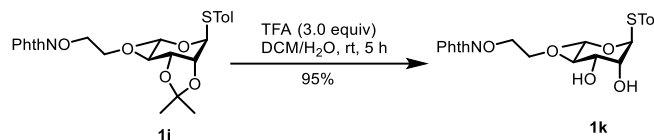

To a solution of **1j** (499.6 mg, 1.00 mmol, 1.0 equiv) in DCM/H<sub>2</sub>O (6.0 mL, *v/v* = 10:1) was added TFA (220  $\mu$ L, 3.00 mmol, 3.0 equiv) at room temperature under an argon atmosphere. The resultant solution was stirred at room temperature for 5 h. The reaction was quenched with saturated NaHCO<sub>3</sub> solution at 0 °C. The resultant mixture was extracted with EA, and the organic layer was washed with brine. The organic layer was collected, dried over Na<sub>2</sub>SO<sub>4</sub>, filtered off the solid and concentrated *in vacuo*. The resulting residue was purified by silica gel column chromatography (DCM:EA = 9:1) to afford **1k** (437.2 mg, 951.4  $\mu$ mol, 95%) as a colorless oil.  $[\alpha]_D^{25} = -139.54$  (*c* 2.9, CHCl<sub>3</sub>); <sup>1</sup>H NMR (400 MHz, Chloroform-*d*)  $\delta$  7.88–7.81 (m, 2H), 7.80–7.68 (m, 2H), 7.32–7.28 (m, 2H), 7.14–7.03 (m, 2H), 5.40 (s, 1H), 4.46–4.32 (m, 2H), 4.30–4.22 (m, 1H), 4.19–4.03 (m, 2H), 4.03–3.98 (m, 2H), 3.94 (d, *J* = 9.1 Hz, 1H), 3.39 (t, *J* = 9.3 Hz, 1H), 3.00–2.84 (m, 1H), 2.31 (s, 3H), 1.30 (d, *J* = 6.2 Hz, 3H); <sup>13</sup>C NMR (101 MHz, Chloroform-*d*)  $\delta$  164.0, 137.4, 134.8, 131.9, 130.6, 129.8, 128.7, 123.8, 87.8, 83.2, 78.3, 72.5, 71.4, 70.6, 68.4, 21.1, 17.8; HRMS (ESI)  $m/z$  calcd for  $C_{23}H_{29}N_2O_7S$   $[M+NH_4]^+$  477.1690, found 477.1693.

**Preparation of **1l** via intermediates **S22** and **S23****

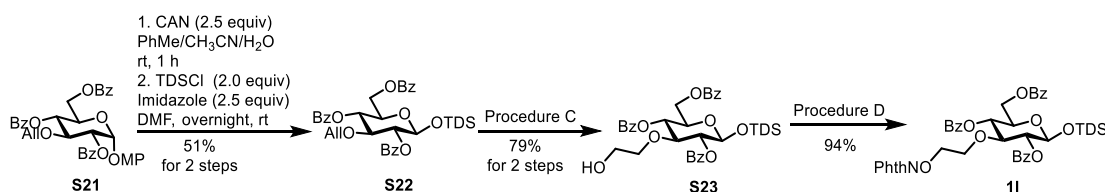

**Dimethylhexylsilyl 3-*O*-allyl-2,4,6-tri-*O*-benzoyl- $\alpha$ -D-glucopyranoside (**S22**)**



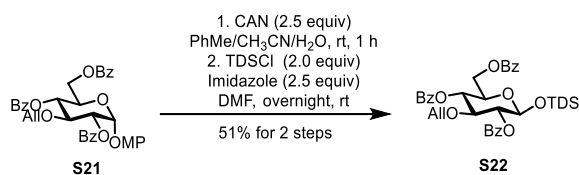

To a solution of **S21**<sup>[6]</sup> (1.92 g, 3.00 mmol, 1.0 equiv) in PhMe/CH<sub>3</sub>CN/H<sub>2</sub>O (30 mL, *v/v/v* = 1:1:1) was added ammonium cerium (IV) nitrate (CAN) (3.51 g, 7.52 mmol, 2.5 equiv) in ice bath under an argon atmosphere. After stirring for 1.5 h at room temperature, the reaction was quenched with saturated NaHCO<sub>3</sub> solution. The resultant mixture was extracted with DCM, and the organic layer was washed with brine. The organic layer was collected, dried over Na<sub>2</sub>SO<sub>4</sub>, filtered off the solid and concentrated *in vacuo* to give the crude product without further purification for next step. The crude product was dissolved in dry DMF (20.0 mL), imidazole (510.0 mg, 7.50 mmol, 2.5 equiv) and TDSCl (1.07 g, 6.00 mmol, 2.0 equiv) were added under an argon atmosphere. The resultant solution was stirred for 12 h at room temperature. The reaction mixture was concentrated *in vacuo*. The resulting residue was purified by silica gel column chromatography (PE:EA = 10:1) to afford **S22** (1.03 g, 1.53 mmol, 51%) as a colorless oil.  $[\alpha]_D^{25} = -3.75$  (*c* 1.8, CHCl<sub>3</sub>); <sup>1</sup>H NMR (400 MHz, Chloroform-*d*)  $\delta$  7.99–7.86 (m, 6H), 7.51–7.39 (m, 3H), 7.39–7.30 (m, 4H), 7.30–7.23 (m, 2H), 5.54–5.38 (m, 1H), 5.32 (t, *J* = 9.6 Hz, 1H), 5.21 (dd, *J* = 9.5, 7.7 Hz, 1H), 5.00–4.86 (m, 1H), 4.85–4.72 (m, 2H), 4.52–4.36 (m, 1H), 4.36–4.24 (m, 1H), 4.00–3.89 (m, 3H), 3.86 (t, *J* = 9.4 Hz, 1H), 1.41–1.31 (m, 1H), 0.67–0.50 (m, 12H), 0.00 (s, 3H), -0.08 (s, 3H); <sup>13</sup>C NMR (101 MHz, Chloroform-*d*)  $\delta$  166.3, 165.3, 164.9, 134.4, 133.6, 133.2, 130.2, 129.9, 129.81, 129.78, 129.5, 128.6, 128.5, 128.4, 117.5, 96.3, 79.6, 75.2, 73.1, 72.4, 71.5, 63.9, 33.9, 24.8, 19.9, 18.5, -1.8, -3.4; HRMS (ESI) *m/z* calcd for C<sub>38</sub>H<sub>50</sub>NO<sub>9</sub>Si [M+NH<sub>4</sub>]<sup>+</sup> 692.3249, found 692.3251.

### Dimethylthexylsilyl 2,4,6-tri-*O*-benzoyl-3-*O*-(2-hydroxyethyl)- $\alpha$ -D-glucopyranoside (**S23**)

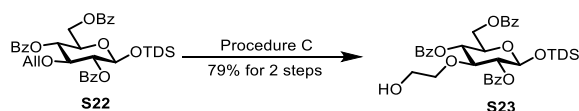

Following the general procedure C, **S22** (675.0 mg, 1.00 mmol, 1.0 equiv) was treated with 2,6-lutidine (230  $\mu\text{L}$ , 2.00 mmol, 2.0 equiv),  $\text{OsO}_4$  (0.0234 mol/L solution in *t*-BuOH, 850.0  $\mu\text{L}$ , 20.0  $\mu\text{mol}$ , 0.02 equiv) and  $\text{NaIO}_4$  (855.5 mg, 4.01 mmol, 4.0 equiv) in 1,4-dioxane/ $\text{H}_2\text{O}$  (8.0 mL, *v/v* = 3:1) to give the aldehyde. The aldehyde was treated with  $\text{NaBH}_4$  (112.9 mg, 3.00 mmol, 3.0 equiv) in MeOH (5.0 mL) to give **S23** (535.2 mg, 788.4  $\mu\text{mol}$ , 79%) as a white foam after purification by silica gel column chromatography (PE:EA = 2.5:1).  $[\alpha]_{\text{D}}^{25} = -4.36$  (*c* 1.3,  $\text{CHCl}_3$ );  $^1\text{H}$  NMR (400 MHz, Chloroform-*d*)  $\delta$  7.98–7.82 (m, 6H), 7.50–7.37 (m, 3H), 7.37–7.22 (m, 6H), 5.33 (t, *J* = 9.6 Hz, 1H), 5.19 (dd, *J* = 9.5, 7.7 Hz, 1H), 4.82 (d, *J* = 7.6 Hz, 1H), 4.50–4.39 (m, 1H), 4.37–4.22 (m, 1H), 3.99–3.88 (m, 1H), 3.83 (t, *J* = 9.3 Hz, 1H), 3.55–3.44 (m, 2H), 3.37–3.27 (m, 2H), 1.78 (brs, 1H), 1.41–1.26 (m, 1H), 0.66–0.49 (m, 12H), 0.00 (s, 3H), -0.08 (s, 3H);  $^{13}\text{C}$  NMR (101 MHz, Chloroform-*d*)  $\delta$  168.1, 167.4, 167.2, 135.6, 135.2, 135.1, 131.8, 131.7, 131.6, 131.1, 130.6, 130.4, 130.3, 98.0, 83.4, 77.1, 75.7, 74.1, 73.3, 65.6, 63.8, 35.8, 26.7, 21.8, 21.7, 20.3, 0.0, -1.6; HRMS (ESI) *m/z* calcd for  $\text{C}_{37}\text{H}_{50}\text{NO}_{10}\text{Si}$   $[\text{M}+\text{NH}_4]^+$  696.3198, found 696.3196.

**Dimethylthexylsilyl 2,4,6-tri-*O*-benzoyl-3-*O*-{2-[(1,3-dioxoisindolin-2-yl)oxy]-ethyl}- $\alpha$ -D-glucopyranoside (**11**)**

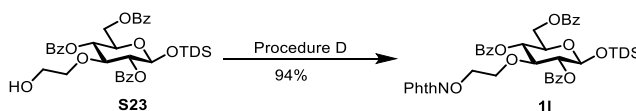

Following the general procedure D, **S23** (380.0 mg, 560.0  $\mu\text{mol}$ , 1.0 equiv) was treated with  $\text{PPh}_3$  (221.1 mg, 840.0  $\mu\text{mol}$ , 1.5 equiv), *N*-hydroxyphthalimide (137.0 mg, 840.0  $\mu\text{mol}$ , 1.5 equiv) and diisopropylazodicarboxylate (165  $\mu\text{L}$ , 840.0  $\mu\text{mol}$ , 1.5 equiv) in THF (5.0 mL) to give **11** (653.0 mg, 792.5  $\mu\text{mol}$ , 94%) as a white foam after purification by silica gel column chromatography (PE:EA = 2:1).  $[\alpha]_{\text{D}}^{25} = -1.90$  (*c* 1.3,  $\text{CHCl}_3$ );  $^1\text{H}$  NMR (400 MHz, Chloroform-*d*)  $\delta$  8.09–7.97 (m, 6H), 7.74–7.68 (m, 4H), 7.53 (t, *J* = 7.4 Hz, 1H), 7.49–7.40 (m, 2H), 7.40–7.30 (m, 6H), 5.42 (t, *J* = 9.6 Hz, 1H), 5.29 (dd, *J* = 9.5, 7.7 Hz, 1H), 4.95 (d, *J* = 7.6 Hz, 1H), 4.60–4.52 (m, 1H), 4.48–4.38 (m, 1H), 4.24 (t, *J* = 9.4 Hz, 1H), 4.12–4.00 (m, 3H), 3.98–3.88 (m, 2H), 1.53–1.42 (m, 1H), 0.74–0.65 (m, 12H), 0.11 (s, 3H), 0.03 (s, 3H);  $^{13}\text{C}$  NMR (101 MHz, Chloroform-*d*)  $\delta$

166.3, 165.3, 165.1, 163.3, 134.5, 133.3, 133.1, 133.0, 130.0, 130.1, 129.9, 129.5, 128.9, 128.5, 128.38, 128.36, 123.5, 96.2, 81.4, 75.0, 72.4, 71.2, 69.6, 63.8, 33.9, 24.8, 19.9, 18.5, -1.8, -3.4; HRMS (ESI)  $m/z$  calcd for  $C_{45}H_{53}N_2O_{12}Si$   $[M+NH_4]^+$  841.3362, found 841.3375.

### Preparation of 1m via intermediates S25–S27

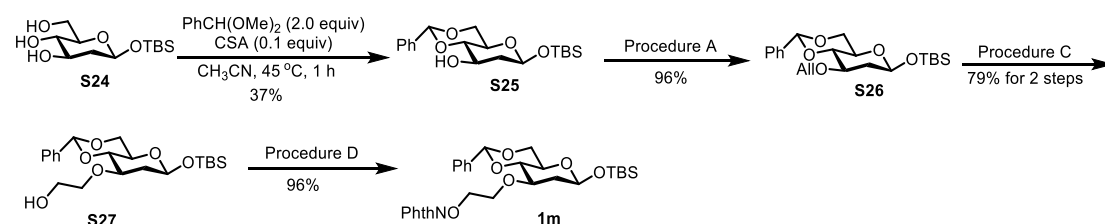

### *tert*-Butyldimethylsilyl 4,6-di-*O*-benzylidene-2-deoxy- $\beta$ -D-glucopyranoside (S25)

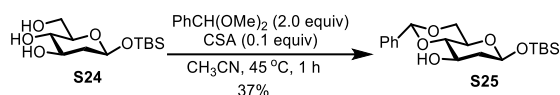

To a solution of **S24**<sup>[7]</sup> (1.39 g, 5.00 mmol, 1.0 equiv) in CH<sub>3</sub>CN (15.0 mL) were added PhCH(OMe)<sub>2</sub> (1.4 mL, 10.00 mmol, 2.0 equiv) and camphorsulfonic acid (116.2 mg, 500.0  $\mu$ mol, 0.1 equiv) in ice bath under an argon atmosphere. The resultant solution was stirred at room temperature for 1.5 h. The reaction was quenched with saturated NaHCO<sub>3</sub> solution. The resultant mixture was extracted with DCM, and the organic layer was washed with brine. The organic layer was collected, dried over Na<sub>2</sub>SO<sub>4</sub>, filtered off the solid and concentrated *in vacuo*. The resulting residue was purified by silica gel column chromatography (PE:EA = 7:1) to afford **S25** (671.4 mg, 1.83 mmol, 37%) as a white foam.  $[\alpha]_D^{25} = -28.63$  ( $c$  1.2, CHCl<sub>3</sub>); <sup>1</sup>H NMR (400 MHz, Chloroform-*d*)  $\delta$  7.55–7.46 (m, 2H), 7.43–7.33 (m, 3H), 5.53 (s, 1H), 4.90 (dd,  $J = 9.4, 2.1$  Hz, 1H), 4.28 (dd,  $J = 10.5, 4.9$  Hz, 1H), 3.92–3.83 (m, 1H), 3.80 (t,  $J = 10.3$  Hz, 1H), 3.46 (t,  $J = 9.0$  Hz, 1H), 3.43–3.26 (m, 1H), 2.60 (s, 1H), 2.31–2.14 (m, 1H), 1.80–1.68 (m, 1H), 0.91 (s, 9H), 0.13 (s, 3H), 0.13 (s, 3H); <sup>13</sup>C NMR (101 MHz, Chloroform-*d*)  $\delta$  137.4, 129.4, 128.5, 126.4, 102.1, 95.3, 83.2, 69.0, 68.4, 66.6, 41.4, 25.8, 18.2, -4.1, -5.1; HRMS (ESI)  $m/z$  calcd for  $C_{19}H_{30}O_5SiNa$   $[M+Na]^+$  389.1755, found 389.1759.

***tert*-Butyldimethylsilyl 3-*O*-allyl-4,6-di-*O*-benzylidene-2-deoxy- $\beta$ -D-glucopyranoside (S26)**

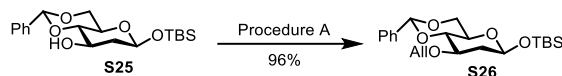

Following the general procedure A, **S25** (540.0 mg, 1.47 mmol, 1.0 equiv) was treated with AllBr (254  $\mu$ L, 2.94 mmol, 2.0 equiv) and 60% dispersion of NaH in mineral oil (118.0 mg, 2.94 mmol, 2.0 equiv) in DMF (20.0 mL) to give **S26** (576.1 mg, 1.42 mmol, 96%) as a colorless oil after purification by silica gel column chromatography (PE:EA = 30:1).  $[\alpha]_D^{25} = -31.44$  ( $c$  1.7,  $\text{CHCl}_3$ );  $^1\text{H NMR}$  (400 MHz, Chloroform- $d$ )  $\delta$  7.55–7.46 (m, 2H), 7.46–7.30 (m, 3H), 6.01–5.81 (m, 1H), 5.57 (s, 1H), 5.35–5.26 (m, 1H), 5.25–5.10 (m, 1H), 4.89 (dd,  $J = 9.5, 2.1$  Hz, 1H), 4.38–4.23 (m, 2H), 4.16 (dd,  $J = 13.0, 5.8$  Hz, 1H), 3.82 (t,  $J = 10.3$  Hz, 1H), 3.75–3.56 (m, 2H), 3.45–3.29 (m, 1H), 2.41–2.20 (m, 1H), 1.77–1.64 (m, 1H), 0.91 (s, 9H), 0.14 (s, 3H), 0.13 (s, 3H);  $^{13}\text{C NMR}$  (101 MHz, Chloroform- $d$ )  $\delta$  137.7, 135.2, 129.0, 128.3, 126.2, 116.9, 101.5, 95.4, 83.1, 74.8, 71.7, 69.1, 66.9, 40.5, 25.8, 18.2, -4.0, -5.1; HRMS (ESI)  $m/z$  calcd for  $\text{C}_{22}\text{H}_{34}\text{O}_5\text{SiNa}$   $[\text{M}+\text{Na}]^+$  429.2068, found 429.2061.

***tert*-Butyldimethylsilyl 4,6-di-*O*-benzylidene-2-deoxy-3-*O*-(2-hydroxyethyl)- $\beta$ -D-glucopyranoside (S27)**

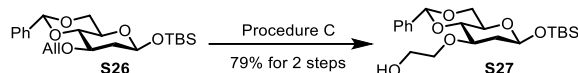

Following the general procedure C, **S26** (630.0 mg, 1.55 mmol, 1.0 equiv) was treated with 2,6-lutidine (355  $\mu$ L, 3.10 mmol, 2.0 equiv),  $\text{OsO}_4$  (0.0234 mol/L solution in  $t$ -BuOH, 1.3 mL, 31.0  $\mu$ mol, 0.02 equiv) and  $\text{NaIO}_4$  (1.33 g, 6.2 mmol, 4.0 equiv) in 1,4-dioxane/ $\text{H}_2\text{O}$  (16.0 mL,  $v/v = 3:1$ ) to give the aldehyde. The aldehyde was treated with  $\text{NaBH}_4$  (117.3 mg, 3.1 mmol, 2.0 equiv) in MeOH (10.0 mL) to give **S27** (505.0 mg, 1.23 mmol, 79%) as a colorless oil after purification by silica gel column chromatography (PE:EA = 3:1).  $[\alpha]_D^{25} = -32.88$  ( $c$  1.4,  $\text{CHCl}_3$ );  $^1\text{H NMR}$  (400 MHz, Chloroform- $d$ )  $\delta$  7.56–7.40 (m, 2H), 7.42–7.33 (m, 3H), 5.56 (s, 1H), 4.89 (dd,  $J = 9.5, 2.1$  Hz, 1H), 4.28 (dd,  $J = 10.5, 5.0$  Hz, 1H), 3.91–3.57 (m, 7H), 3.48–3.30 (m, 1H), 2.46 (s, 1H), 2.37–2.18 (m, 1H), 1.82–1.60 (m, 1H), 0.91 (s, 9H), 0.13 (s, 3H), 0.12 (s,

3H);  $^{13}\text{C}$  NMR (101 MHz, Chloroform-*d*)  $\delta$  137.3, 129.2, 128.5, 126.2, 101.7, 95.4, 82.6, 76.2, 72.0, 69.0, 66.8, 62.2, 40.5, 25.8, 18.1, -4.1, -5.1; HRMS (ESI)  $m/z$  calcd for  $\text{C}_{21}\text{H}_{34}\text{O}_6\text{SiNa}$   $[\text{M}+\text{Na}]^+$  433.2017, found 433.2025.

***tert*-Butyldimethylsilyl** **4,6-di-*O*-benzylidene-2-deoxy-3-*O*-{2-[(1,3-dioxoisindolin-2-yl)oxy]ethyl}- $\beta$ -D-glucopyranoside (**1m**)**

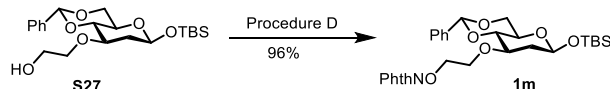

Following the general procedure D, **S27** (460.0 mg, 1.12 mmol, 1.0 equiv) was treated with  $\text{PPh}_3$  (351.5 mg, 1.34 mmol, 1.2 equiv), *N*-hydroxyphthalimide (218.6 mg, 1.34 mmol, 1.2 equiv) and diisopropylazodicarboxylate (265  $\mu\text{L}$ , 1.34 mmol, 1.2 equiv) in THF (4.0 mL) to give **1m** (597.3 mg, 1.07 mmol, 96%) as a white foam after purification by silica gel column chromatography (PE:EA = 3:1).  $[\alpha]_{\text{D}}^{25} = -28.74$  (*c* 1.4,  $\text{CHCl}_3$ );  $^1\text{H}$  NMR (400 MHz, Chloroform-*d*)  $\delta$  7.83–7.75 (m, 2H), 7.74–7.69 (m, 2H), 7.48–7.40 (m, 2H), 7.36–7.28 (m, 3H), 5.52 (s, 1H), 4.86 (dd,  $J = 9.5, 2.1$  Hz, 1H), 4.44–4.34 (m, 1H), 4.34–4.27 (m, 1H), 4.25 (dd,  $J = 10.5, 4.9$  Hz, 1H), 4.21–4.13 (m, 1H), 4.02–3.94 (m, 1H), 3.78 (t,  $J = 10.3$  Hz, 1H), 3.71–3.62 (m, 1H), 3.53 (t,  $J = 9.0$  Hz, 1H), 3.37–3.27 (m, 1H), 2.37–2.16 (m, 1H), 1.58–1.40 (m, 1H), 0.89 (s, 9H), 0.19 (s, 6H);  $^{13}\text{C}$  NMR (101 MHz, Chloroform-*d*)  $\delta$  163.6, 137.6, 134.5, 129.0, 128.3, 126.1, 123.5, 101.3, 95.3, 83.4, 77.4, 76.0, 69.6, 69.0, 66.6, 40.3, 25.8, 18.1, -4.1, -5.1; HRMS (ESI)  $m/z$  calcd for  $\text{C}_{29}\text{H}_{37}\text{NO}_8\text{SiNa}$   $[\text{M}+\text{Na}]^+$  578.2181, found 578.2179.

**Preparation of 1n via intermediate S29**

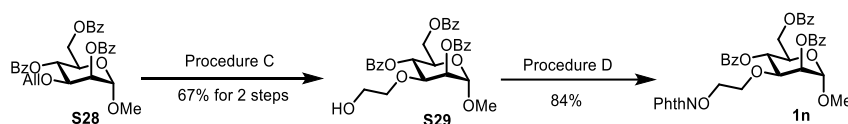

**Methyl 2,4,6-tri-*O*-benzoyl-3-*O*-(2-hydroxyethyl)- $\alpha$ -D-mannopyranoside (**S29**)**

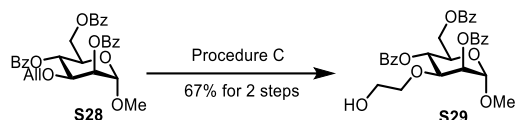

Following the general procedure C, **S28**<sup>[8]</sup> (1.35 g, 2.47 mmol, 1.0 equiv) was treated with 2,6-lutidine (580  $\mu$ L, 4.94 mmol, 2.0 equiv), OsO<sub>4</sub> (0.0234 mol/L solution in *t*-BuOH, 2.1 mL, 49.4 mmol, 0.02 equiv) and NaIO<sub>4</sub> (2.1 g, 9.88 mmol, 4.0 equiv) in 1,4-dioxane/H<sub>2</sub>O (24.0 mL, *v/v* = 3:1) to give the aldehyde. The aldehyde was treated with NaBH<sub>4</sub> (187.0 mg, 4.94 mmol, 2.0 equiv) in MeOH (10.0 mL) to give **S29** (893.5 mg, 1.62 mmol, 67%) as a white foam after purification by silica gel column chromatography (PE:EA = 1.5:1).  $[\alpha]_{\text{D}}^{25} = -13.15$  (*c* 0.8, CHCl<sub>3</sub>); <sup>1</sup>H NMR (400 MHz, Chloroform-*d*)  $\delta$  8.14–8.00 (m, 6H), 7.61–7.54 (m, 3H), 7.47–7.34 (m, 6H), 5.78 (t, *J* = 9.9 Hz, 1H), 5.67–5.59 (m, 1H), 4.92 (d, *J* = 1.4 Hz, 1H), 4.70 (dd, *J* = 12.1, 2.6 Hz, 1H), 4.43 (dd, *J* = 12.1, 4.7 Hz, 1H), 4.31–4.22 (m, 1H), 4.13 (dd, *J* = 9.7, 3.3 Hz, 1H), 3.79–3.70 (m, 1H), 3.63–3.56 (m, 1H), 3.55–3.50 (m, 2H), 3.49 (s, 3H), 2.27 (s, 1H); <sup>13</sup>C NMR (101 MHz, Chloroform-*d*)  $\delta$  166.4, 166.2, 165.7, 133.6, 133.2, 130.1, 130.0, 129.9, 129.5, 129.4, 128.7, 128.6, 99.2, 77.1, 72.9, 69.7, 68.9, 68.8, 63.2, 61.8, 55.6; HRMS (ESI) *m/z* calcd for C<sub>30</sub>H<sub>34</sub>NO<sub>10</sub> [M+NH<sub>4</sub>]<sup>+</sup> 568.2177, found 568.2183.

**Methyl 2,4,6-tri-*O*-benzoyl-3-*O*-{2-[(1,3-dioxoisindolin-2-yl)oxy]ethyl}- $\alpha$ -D-mannopyranoside (**1n**)**

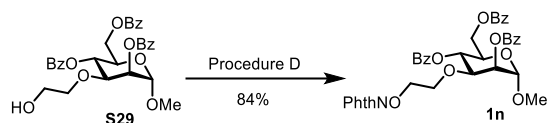

Following the general procedure D, **S29** (722.0 mg, 1.31 mmol, 1.0 equiv) was treated with PPh<sub>3</sub> (412.3 mg, 1.57  $\mu$ mol, 1.2 equiv), *N*-hydroxyphthalimide (256.4 mg, 1.57 mmol, 1.2 equiv) and diisopropylazodicarboxylate (310  $\mu$ L, 1.57 mmol, 1.2 equiv) in THF (4.0 mL) to give **1n** (767.8 mg, 1.10 mmol, 84%) as a white foam after purification by silica gel column chromatography (PE:EA = 2:1).  $[\alpha]_{\text{D}}^{25} = -2.16$  (*c* 6.4, CHCl<sub>3</sub>); <sup>1</sup>H NMR (400 MHz, Chloroform-*d*)  $\delta$  8.10–8.04 (m, 4H), 8.03–7.99 (m, 2H), 7.72–7.64 (m, 4H), 7.58–7.52 (m, 2H), 7.48 (t, *J* = 7.9 Hz, 1H), 7.42–7.31 (m, 6H), 5.77 (t, *J* =

9.9 Hz, 1H), 5.69–5.64 (m, 1H), 4.93 (d,  $J = 1.5$  Hz, 1H), 4.65 (dd,  $J = 12.1, 2.6$  Hz, 1H), 4.41 (dd,  $J = 12.1, 4.8$  Hz, 1H), 4.33 (dd,  $J = 9.7, 3.3$  Hz, 1H), 4.28–4.21 (m, 1H), 4.20–4.15 (m, 2H), 4.05–3.96 (m, 1H), 3.92–3.84 (m, 1H), 3.47 (s, 3H);  $^{13}\text{C}$  NMR (101 MHz, Chloroform- $d$ )  $\delta$  166.4, 165.8, 165.6, 163.4, 134.4, 133.32, 133.27, 133.1, 130.1, 130.0, 129.9, 129.72, 129.69, 128.9, 128.5, 123.6, 99.0, 77.8, 76.8, 69.7, 68.9, 68.8, 68.7, 63.3, 55.5; HRMS (ESI)  $m/z$  calcd for  $\text{C}_{38}\text{H}_{33}\text{NO}_{12}\text{Na}$   $[\text{M}+\text{Na}]^+$  718.1895, found 718.1899.

### Preparation of **1o** via intermediates **S31** and **S32**

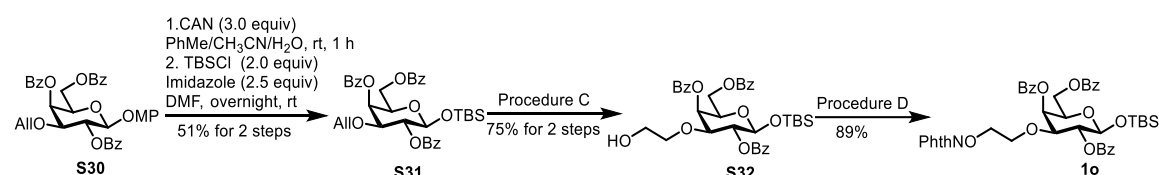

### *tert*-Butyldimethylsilyl 3-*O*-allyl-2,3,6-tri-*O*-benzoyl- $\beta$ -D-galactopyranoside (**S31**)

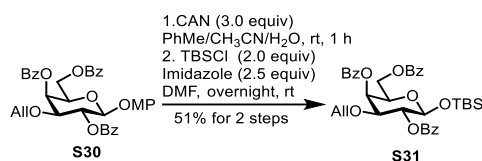

To a solution of **S30**<sup>[9]</sup> (1.15 g, 1.80 mmol, 1.0 equiv) in PhMe/ $\text{CH}_3\text{CN}/\text{H}_2\text{O}$  (15.0 mL,  $v/v/v = 1:1:1$ ) was added CAN (2.53 g, 5.40 mmol, 3.0 equiv) in ice bath under an argon atmosphere. After stirring for 0.5 h in ice bath, the reaction was quenched with saturated  $\text{NaHCO}_3$  solution. The resultant mixture was extracted with DCM, and the organic layer was washed with brine. The organic layer was collected, dried over  $\text{Na}_2\text{SO}_4$ , filtered off the solid and concentrated *in vacuo* to give the crude product without further purification for next step. The crude product was dissolved in dry DMF (10.0 mL), imidazole (306.3 mg, 4.50 mmol, 2.5 equiv) and *tert*-butyldimethylsilyl chloride (TBSCl) (542.6 mg, 3.60 mmol, 2.0 equiv) were added under an argon atmosphere. The resultant solution was stirred for 12 h at room temperature. The reaction mixture was concentrated *in vacuo*. The resulting residue was purified by silica gel column chromatography (PE:EA = 10:1) to afford **S31** (586.3 mg, 906.5  $\mu\text{mol}$ , 51%) as a white foam.  $[\alpha]_{\text{D}}^{25} = +54.17$  ( $c$  3.0,  $\text{CHCl}_3$ );  $^1\text{H}$  NMR (400 MHz, Chloroform- $d$ )  $\delta$  8.11–8.02

(m, 2H), 8.01–7.89 (m, 4H), 7.52–7.42 (m, 3H), 7.42–7.25 (m, 6H), 5.72 (d,  $J = 2.9$  Hz, 1H), 5.63–5.49 (m, 1H), 5.38 (dd,  $J = 10.1, 7.8$  Hz, 1H), 5.11–5.02 (m, 1H), 4.98–4.91 (m, 1H), 4.79 (d,  $J = 7.7$  Hz, 1H), 4.51–4.28 (m, 2H), 4.11–3.96 (m, 2H), 3.87 (dd,  $J = 13.3, 6.4$  Hz, 1H), 3.71 (dd,  $J = 10.1, 3.5$  Hz, 1H), 0.67 (s, 9H), -0.00 (s, 3H), -0.08 (s, 3H);  $^{13}\text{C}$  NMR (101 MHz, Chloroform-*d*)  $\delta$  166.3, 166.1, 165.4, 134.3, 133.5, 133.4, 133.1, 130.3, 129.9, 129.8, 129.7, 129.5, 128.6, 128.5, 117.8, 96.7, 76.6, 73.4, 71.8, 70.8, 67.5, 63.2, 25.6, 18.0, -4.1, -5.1; HRMS (ESI)  $m/z$  calcd for  $\text{C}_{36}\text{H}_{46}\text{NO}_9\text{Si}$   $[\text{M}+\text{NH}_4]^+$  664.2936, found 664.2950.

***tert*-Butyldimethylsilyl 2,3,6-tri-*O*-benzoyl-3-*O*-(2-hydroxyethyl)- $\beta$ -D-galactopyranoside (S32)**

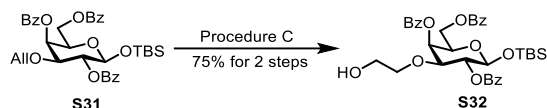

Following the general procedure C, **S31** (400.0 mg, 620.0  $\mu\text{mol}$ , 1.0 equiv) was treated with 2,6-lutidine (145  $\mu\text{L}$ , 1.24 mmol, 2.0 equiv),  $\text{OsO}_4$  (0.0234 mol/L solution in *t*-BuOH, 530  $\mu\text{L}$ , 12.4  $\mu\text{mol}$ , 0.02 equiv) and  $\text{NaIO}_4$  (530.0 mg, 2.48 mmol, 4.0 equiv) in 1,4-dioxane/ $\text{H}_2\text{O}$  (8.0 mL,  $v/v = 3:1$ ) to give the aldehyde. The aldehyde was treated with  $\text{NaBH}_4$  (35.0 mg, 930.0  $\mu\text{mol}$ , 1.5 equiv) in MeOH (3.0 mL) to give **S32** (301.5 mg, 463.3  $\mu\text{mol}$ , 75%) as a colorless oil after purification by silica gel column chromatography (PE:EA = 2:1).  $[\alpha]_{\text{D}}^{25} = +54.59$  ( $c$  0.7,  $\text{CHCl}_3$ );  $^1\text{H}$  NMR (400 MHz, Chloroform-*d*)  $\delta$  8.20–8.12 (m, 2H), 8.07–8.00 (m, 4H), 7.64–7.54 (m, 3H), 7.52–7.48 (m, 2H), 7.47–7.41 (m, 4H), 5.84 (d,  $J = 2.8$  Hz, 1H), 5.45 (dd,  $J = 10.0, 7.8$  Hz, 1H), 4.91 (d,  $J = 7.7$  Hz, 1H), 4.59 (dd,  $J = 11.4, 7.4$  Hz, 1H), 4.45 (dd,  $J = 11.4, 5.5$  Hz, 1H), 4.16 (t,  $J = 6.3$  Hz, 1H), 3.82 (dd,  $J = 10.1, 3.5$  Hz, 1H), 3.79–3.71 (m, 1H), 3.63–3.57 (m, 1H), 3.54–3.48 (m, 2H), 2.43 (s, 1H), 0.79 (s, 9H), 0.12 (s, 3H), 0.04 (s, 3H);  $^{13}\text{C}$  NMR (101 MHz, Chloroform-*d*)  $\delta$  166.7, 166.3, 165.5, 133.7, 133.4, 133.3, 130.3, 129.9, 129.7, 129.6, 129.3, 128.7, 128.6, 128.5, 96.6, 79.7, 73.9, 73.5, 71.6, 68.4, 62.9, 61.8, 25.6, 18.0, -4.1, -5.1; HRMS (ESI)  $m/z$  calcd for  $\text{C}_{35}\text{H}_{46}\text{NO}_{10}\text{Si}$   $[\text{M}+\text{NH}_4]^+$  668.2885, found 668.2899.



***tert*-Butyldimethylsilyl 2,3,6-tri-*O*-benzoyl-3-*O*-{2-[(1,3-dioxoisindolin-2-yl)oxy]-ethyl}- $\beta$ -*D*-galactopyranoside (**1o**)**

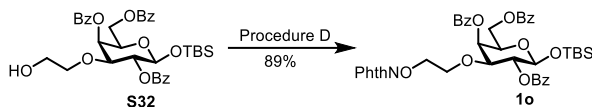

Following the general procedure D, **S32** (260.0 mg, 400.0  $\mu\text{mol}$ , 1.0 equiv) was treated with  $\text{PPh}_3$  (125.9 mg, 480.0  $\mu\text{mol}$ , 1.2 equiv), *N*-hydroxyphthalimide (78.3 mg, 480.0  $\mu\text{mol}$ , 1.2 equiv) and diisopropylazodicarboxylate (95  $\mu\text{L}$ , 480.0  $\mu\text{mol}$ , 1.2 equiv) in THF (4.0 mL) to give **1o** (284.1 mg, 356.9  $\mu\text{mol}$ , 89%) as a white foam after purification by silica gel column chromatography (PE:EA = 3:1).  $[\alpha]_{\text{D}}^{25} = +31.07$  (*c* 1.7,  $\text{CHCl}_3$ );  $^1\text{H NMR}$  (400 MHz, Chloroform-*d*)  $\delta$  8.18–8.12 (m, 2H), 8.11–8.05 (m, 4H), 7.75–7.66 (m, 4H), 7.62–7.53 (m, 2H), 7.53–7.45 (m, 3H), 7.45–7.37 (m, 4H), 6.08 (d,  $J = 2.8$  Hz, 1H), 5.48 (dd,  $J = 10.1, 7.7$  Hz, 1H), 4.97 (d,  $J = 7.7$  Hz, 1H), 4.61 (dd,  $J = 11.3, 7.5$  Hz, 1H), 4.53–4.41 (m, 2H), 4.32–4.21 (m, 3H), 4.00–3.91 (m, 1H), 3.89–3.82 (m, 1H), 0.79 (s, 9H), 0.12 (s, 3H), 0.05 (s, 3H);  $^{13}\text{C NMR}$  (101 MHz, Chloroform-*d*)  $\delta$  166.3, 166.1, 165.5, 163.7, 134.6, 133.4, 133.2, 133.0, 129.8, 129.6, 128.9, 128.6, 128.5, 128.4, 123.7, 96.7, 79.7, 78.4, 73.7, 71.7, 68.3, 67.6, 63.1, 25.6, 18.0, -4.1, -5.1; HRMS (ESI)  $m/z$  calcd for  $\text{C}_{43}\text{H}_{49}\text{N}_2\text{O}_{12}\text{Si}$   $[\text{M}+\text{NH}_4]^+$  813.3049, found 813.3061.

**Preparation of **1p** via intermediates **S34** and **S35**.**

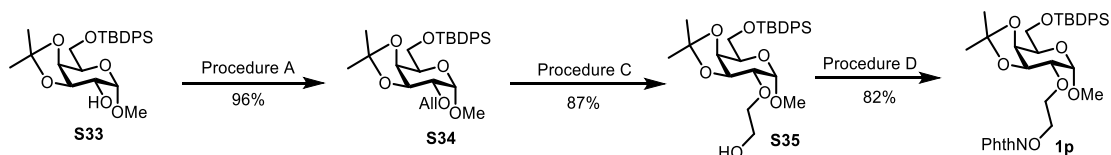

**Methyl 2-*O*-allyl-6-*O*-*tert*-butyldiphenylsilyl-3,4-*O*-isopropylidene- $\alpha$ -*D*-galactopyranoside (**S34**)**

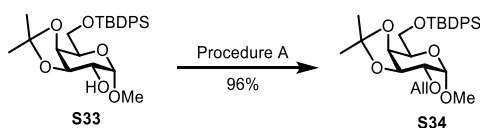

Following the general procedure A, **S33**<sup>[10]</sup> (3.22 g, 6.74 mmol, 1.0 equiv) was treated with AlIBr (985  $\mu$ L, 9.52 mmol, 1.4 equiv) and 60% dispersion of NaH in mineral oil (380.0 mg, 9.52 mmol, 1.4 equiv) in DMF (40.0 mL) to give **S34** (3.31 g, 6.46 mmol, 96%) as a colorless oil after purification by silica gel column chromatography (PE:EA = 8:1).  $[\alpha]_D^{25} = +54.92$  (*c* 1.4, CHCl<sub>3</sub>); <sup>1</sup>H NMR (400 MHz, Chloroform-*d*)  $\delta$  7.76–7.69 (m, 4H), 7.47–7.35 (m, 6H), 6.00–5.88 (m, 1H), 5.32–5.25 (m, 1H), 5.20 (d, *J* = 10.3 Hz, 1H), 4.75 (d, *J* = 3.5 Hz, 1H), 4.32–4.28 (m, 2H), 4.27 (d, *J* = 5.3 Hz, 1H), 4.19 (dd, *J* = 13.0, 6.4 Hz, 1H), 4.05 (t, *J* = 7.2 Hz, 1H), 3.97 (dd, *J* = 9.8, 6.8 Hz, 1H), 3.88 (dd, *J* = 9.8, 6.5 Hz, 1H), 3.53 (dd, *J* = 7.4, 3.5 Hz, 1H), 3.39 (s, 3H), 1.52 (s, 3H), 1.36 (s, 3H), 1.08 (s, 9H); <sup>13</sup>C NMR (101 MHz, Chloroform-*d*)  $\delta$  135.7, 135.0, 133.6, 133.5, 129.8, 127.8, 127.7, 117.9, 109.1, 98.4, 76.7, 76.2, 73.4, 71.9, 67.7, 63.0, 55.4, 28.4, 26.9, 26.5, 19.3; HRMS (ESI) *m/z* calcd for C<sub>29</sub>H<sub>40</sub>O<sub>6</sub>SiNa [M+Na]<sup>+</sup> 535.2486, found 535.2491.

**Methyl 6-*O*-*tert*-butyldiphenylsilyl-2-*O*-(2-hydroxyethyl)-3,4-*O*-isopropylidene- $\alpha$ -D-galactopyranoside (**S35**)**

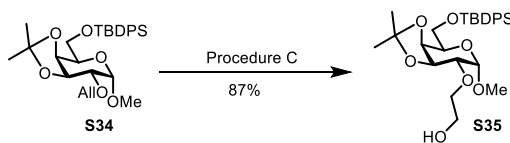

Following the general procedure C, **S34** (3.21 g, 6.24 mmol, 1.0 equiv) was treated with 2,6-lutidine (1.5 mL, 12.48 mmol, 2.0 equiv), OsO<sub>4</sub> (0.0234 mol/L solution in *t*-BuOH, 5.3 mL, 124.8  $\mu$ mol, 0.02 equiv) and NaIO<sub>4</sub> (5.33 g, 24.96 mmol, 4.0 equiv) in 1,4-dioxane/H<sub>2</sub>O (40.0 mL, *v/v* = 3:1) to give the aldehyde. The aldehyde was treated with NaBH<sub>4</sub> (472.3 mg, 12.48 mmol, 2.0 equiv) in MeOH (20.0 mL) to give **S35** (2.81 g, 5.44 mmol, 87%) as a white foam after purification by silica gel column chromatography (PE:EA = 1.5:1).  $[\alpha]_D^{25} = +52.51$  (*c* 2.5, CHCl<sub>3</sub>); <sup>1</sup>H NMR (400 MHz, Chloroform-*d*)  $\delta$  7.76–7.67 (m, 4H), 7.47–7.35 (m, 6H), 4.79 (d, *J* = 3.5 Hz, 1H), 4.34–4.25 (m, 2H), 4.05 (dd, *J* = 6.5, 3.2 Hz, 1H), 3.98 (dd, *J* = 9.8, 6.9 Hz, 1H), 3.89 (dd, *J* = 9.9, 6.5 Hz, 1H), 3.81–3.70 (m, 4H), 3.52 (dd, *J* = 7.3, 3.5 Hz, 1H), 3.39 (s, 3H), 3.11 (s, 1H), 1.53 (s, 3H), 1.35 (s, 3H), 1.08 (s, 9H); <sup>13</sup>C NMR (101 MHz, Chloroform-*d*)  $\delta$

135.6, 133.5, 133.3, 129.7, 127.7, 127.6, 109.2, 97.9, 78.9, 75.7, 73.2, 72.7, 67.8, 62.9, 61.9, 55.3, 28.2, 26.8, 26.4, 19.2; HRMS (ESI)  $m/z$  calcd for  $C_{28}H_{44}NO_7Si$   $[M+NH_4]^+$  534.2882, found 534.2895.

**Methyl 6-*O*-*tert*-butyldiphenylsilyl-2-*O*-{2-[(1,3-dioxoisindolin-2-yl)oxy]ethyl}-3,4-*O*-isopropylidene- $\alpha$ -D-galactopyranoside (**1p**)**

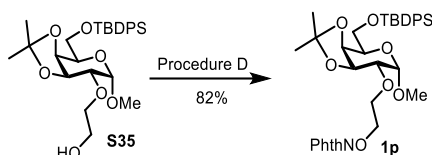

Following the general procedure D, **S35** (1.03 g, 2.00 mmol, 1.0 equiv) was treated with  $PPh_3$  (629.5 mg, 2.40 mmol, 1.2 equiv), *N*-hydroxyphthalimide (391.4 mg, 2.40 mmol, 1.2 equiv) and diisopropylazodicarboxylate (480  $\mu$ L, 2.4 mmol, 1.2 equiv) in THF (10.0 mL) to give **1p** (1.09 g, 1.65 mmol, 82%) as a white foam after purification by silica gel column chromatography (PE:EA = 3:1).  $[\alpha]_D^{25} = +114.49$  ( $c$  1.8,  $CHCl_3$ );  $^1H$  NMR (400 MHz, Chloroform-*d*)  $\delta$  7.84–7.79 (m, 2H), 7.75–7.66 (m, 6H), 7.45–7.33 (m, 6H), 4.79 (d,  $J = 3.5$  Hz, 1H), 4.48–4.40 (m, 1H), 4.38–4.31 (m, 1H), 4.27–4.21 (m, 2H), 4.18–4.11 (m, 1H), 4.07–4.01 (m, 1H), 4.01–3.92 (m, 2H), 3.85 (dd,  $J = 9.6, 6.2$  Hz, 1H), 3.55 (dd,  $J = 7.0, 3.6$  Hz, 1H), 3.24 (s, 3H), 1.51 (s, 3H), 1.31 (s, 3H), 1.05 (s, 9H);  $^{13}C$  NMR (101 MHz, Chloroform-*d*)  $\delta$  163.4, 135.7, 134.4, 133.4, 129.7, 129.0, 127.7, 123.5, 109.1, 98.3, 78.8, 77.5, 76.2, 73.3, 69.6, 67.6, 63.0, 55.2, 28.4, 26.8, 26.4, 19.2; HRMS (ESI)  $m/z$  calcd for  $C_{36}H_{47}N_2O_9Si$   $[M+NH_4]^+$  679.3045, found 679.3057.

**Preparation of 7a via intermediates S2 and S4**

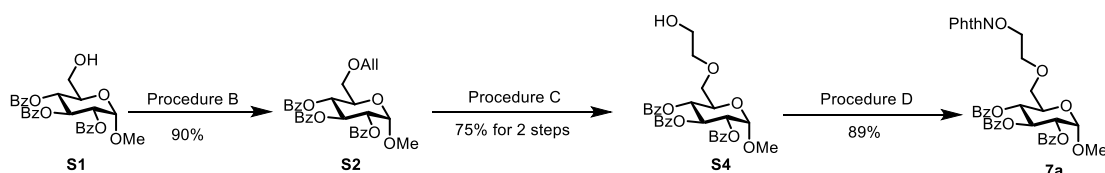

**Methyl 6-*O*-allyl-2,3,4-tri-*O*-benzoyl- $\alpha$ -D-glucopyranoside (**S2**)**

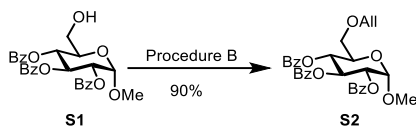

Following the general procedure B, **S1** (1.52 g, 3.00 mmol, 1.0 equiv) was treated with 2,4,6-tris(allyloxy)-1,3,5-triazine (670.0  $\mu\text{L}$ , 3.00 mmol, 1.0 equiv) and TfOH (100  $\mu\text{L}$ , 1.2 mmol, 0.4 equiv) in 1,4-dioxane (3.0 mL) to give **S2** (1.47 g, 2.69 mmol, 90%) as a white foam after purification by silica gel column chromatography (PE:EA = 3:1).

$[\alpha]_{\text{D}}^{25} = +47.80$  (*c* 3.1,  $\text{CHCl}_3$ );  $^1\text{H NMR}$  (400 MHz, Chloroform-*d*)  $\delta$  8.06–7.92 (m, 4H), 7.92–7.81 (m, 2H), 7.55–7.47 (m, 2H), 7.46–7.34 (m, 5H), 7.32–7.27 (m, 2H), 6.15 (t,  $J = 9.6$  Hz, 1H), 5.92–5.78 (m, 1H), 5.61 (t,  $J = 9.9$  Hz, 1H), 5.33–5.18 (m, 3H), 5.13–5.07 (m, 1H), 4.29–4.17 (m, 1H), 4.07–3.94 (m, 2H), 3.72–3.57 (m, 2H), 3.48 (s, 3H);  $^{13}\text{C NMR}$  (101 MHz, Chloroform-*d*)  $\delta$  165.9, 165.3, 134.3, 133.4, 133.1, 130.0, 129.8, 129.7, 129.3, 129.2, 129.1, 128.4, 128.3, 97.0, 72.7, 72.2, 70.6, 69.6, 68.9, 68.6, 55.6; HRMS (ESI)  $m/z$  calcd for  $\text{C}_{31}\text{H}_{34}\text{NO}_9$   $[\text{M}+\text{NH}_4]^+$  564.2228, found 564.2219.

#### Methyl 2,3,4-tri-*O*-benzoyl-6-*O*-(2-hydroxyethyl)- $\alpha$ -D-glucopyranoside (**S4**)

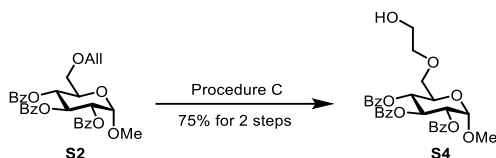

Following the general procedure C, **S2** (1.47 g, 2.69 mmol, 1.0 equiv) was treated with 2,6-lutidine (630  $\mu\text{L}$ , 5.38 mmol, 2.0 equiv),  $\text{OsO}_4$  (0.0234 mol/L solution in *t*-BuOH, 2.3 mL, 0.0538 mmol, 0.02 equiv) and  $\text{NaIO}_4$  (2.31 g, 10.76 mmol, 4.0 equiv) in 1,4-dioxane/ $\text{H}_2\text{O}$  (12.0 mL,  $v/v = 3:1$ ) to give the aldehyde. The aldehyde was treated with  $\text{NaBH}_4$  (203.0 mg, 5.38 mmol, 2.0 equiv) in MeOH (10.0 mL) to give **S4** (1.11 g, 2.02 mmol, 75%) as a white foam after purification by silica gel column chromatography (PE:EA = 1.3:1).

#### Methyl 2,3,4-tri-*O*-benzoyl-6-*O*-{2-[(1,3-dioxisoindolin-2-yl)oxy]ethyl}- $\alpha$ -D-glucopyranoside (**7a**)

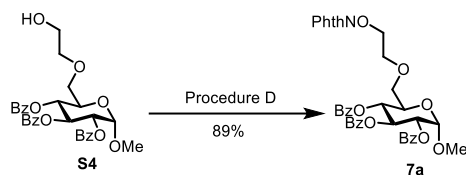

Following the general procedure D, **S4** (330.1 mg, 600.0  $\mu\text{mol}$ , 1.0 equiv) was treated with  $\text{PPh}_3$  (315.0 mg, 1.20 mmol, 2.0 equiv), *N*-hydroxyphthalimide (195.9 mg, 1.20 mmol, 2.0 equiv) and diisopropylazodicarboxylate (175  $\mu\text{L}$ , 1.20 mmol, 2.0 equiv) in THF (6.0 mL) to give **7a** (370.0 mg, 531.9  $\mu\text{mol}$ , 89%) as a white foam after purification by silica gel column chromatography (PE:DCM:EA = 5:1:1).  $[\alpha]_{\text{D}}^{25} = +33.56$  (*c* 2.2,  $\text{CHCl}_3$ );  $^1\text{H NMR}$  (400 MHz, Chloroform-*d*)  $\delta$  7.99–7.91 (m, 4H), 7.89–7.83 (m, 2H), 7.83–7.78 (m, 2H), 7.77–7.70 (m, 2H), 7.54–7.45 (m, 2H), 7.42–7.31 (m, 5H), 7.31–7.26 (m, 2H), 6.09 (t,  $J = 9.9$  Hz, 1H), 5.49 (t,  $J = 9.9$  Hz, 1H), 5.15 (dd,  $J = 10.2$ , 3.6 Hz, 1H), 5.03 (d,  $J = 3.6$  Hz, 1H), 4.43–4.34 (m, 1H), 4.34–4.25 (m, 1H), 4.18–4.06 (m, 1H), 3.91–3.81 (m, 2H), 3.80–3.62 (m, 2H), 3.34 (s, 3H);  $^{13}\text{C NMR}$  (101 MHz, Chloroform-*d*)  $\delta$  165.9, 165.5, 163.5, 134.5, 133.44, 133.39, 133.2, 130.0, 129.9, 129.8, 129.4, 129.2, 129.1, 128.50, 128.49, 128.4, 96.8, 72.2, 70.6, 70.3, 70.1, 69.7, 68.9, 55.5; HRMS (ESI)  $m/z$  calcd for  $\text{C}_{38}\text{H}_{37}\text{N}_2\text{O}_{12}$   $[\text{M}+\text{NH}_4]^+$  713.2341, found 713.2335.

### Preparation of **7b** via intermediates **S37** and **S38**

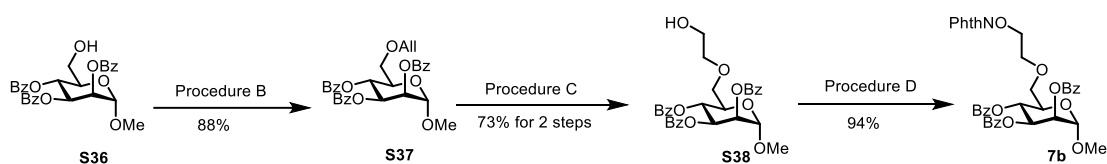

### Methyl 6-*O*-allyl-2,3,4-tri-*O*-benzoyl- $\alpha$ -D-mannopyranoside (**S37**)

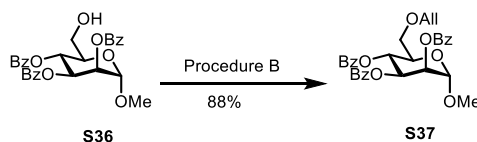

Following the general procedure B, **S36**<sup>[11]</sup> (2.53 g, 5.00 mmol, 1.0 equiv) was treated with 2,4,6-tris(allyloxy)-1,3,5-triazine (1.2 mL, 5.00 mmol, 1.0 equiv) and TfOH (177  $\mu\text{L}$ , 1.20 mmol, 0.4 equiv) in 1,4-dioxane (17.0 mL) to give **S37** (2.39 g, 4.38 mmol,

88%) as a white foam after purification by silica gel column chromatography (PE:EA = 4:1).  $[\alpha]_D^{25} = -157.71$  (*c* 3.2, CHCl<sub>3</sub>); <sup>1</sup>H NMR (400 MHz, Chloroform-*d*)  $\delta$  8.14–8.08 (m, 2H), 8.01–7.94 (m, 2H), 7.87–7.77 (m, 2H), 7.60 (t, *J* = 7.4 Hz, 1H), 7.55–7.45 (m, 3H), 7.45–7.34 (m, 3H), 7.29–7.24 (m, 2H), 5.95 (t, *J* = 10.0 Hz, 1H), 5.91–5.82 (m, 2H), 5.71–5.65 (m, 1H), 5.32–5.22 (m, 1H), 5.12 (d, *J* = 11.3 Hz, 1H), 5.03–4.96 (m, 1H), 4.33–4.20 (m, 1H), 4.13–3.92 (m, 2H), 3.79–3.67 (m, 2H), 3.54 (s, 3H); <sup>13</sup>C NMR (101 MHz, Chloroform-*d*)  $\delta$  165.67, 165.65, 165.6, 134.5, 133.6, 133.4, 133.2, 130.1, 129.9, 129.8, 129.5, 129.4, 129.3, 128.7, 128.5, 128.4, 117.2, 98.7, 72.7, 70.6, 70.3, 70.1, 69.2, 67.5, 55.5; HRMS (ESI) *m/z* calcd for C<sub>31</sub>H<sub>34</sub>NO<sub>9</sub> [M+NH<sub>4</sub>]<sup>+</sup> 564.2228, found 564.2219.

#### Methyl 2,3,4-tri-*O*-benzoyl-6-*O*-(2-hydroxyethyl)- $\alpha$ -D-mannopyranoside (**S38**)

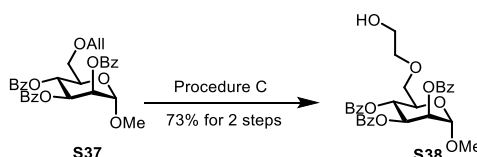

Following the general procedure C, **S37** (1.10 g, 2.00 mmol, 1.0 equiv) was treated with 2,6-lutidine (466  $\mu$ L, 4.00 mmol, 2.0 equiv), OsO<sub>4</sub> (0.0234 mol/L solution in *t*-BuOH, 1.7 mL, 40.0  $\mu$ mol, 0.02 equiv) and NaIO<sub>4</sub> (1.70 g, 4.00 mmol, 4.0 equiv) in 1,4-dioxane/H<sub>2</sub>O (12.0 mL, *v/v* = 3:1) to give the aldehyde. The aldehyde was treated with NaBH<sub>4</sub> (151.3 mg, 4.00 mmol, 2.0 equiv) in MeOH (10.0 mL) to give **S38** (806.8 mg, 1.47 mmol, 73%) as a white foam after purification by silica gel column chromatography (PE:EA = 1.3:1).  $[\alpha]_D^{25} = -122.82$  (*c* 1.3, CHCl<sub>3</sub>); <sup>1</sup>H NMR (400 MHz, Chloroform-*d*)  $\delta$  8.15–8.09 (m, 2H), 8.01–7.96 (m, 2H), 7.86–7.79 (m, 2H), 7.61 (t, *J* = 7.5 Hz, 1H), 7.56–7.46 (m, 3H), 7.46–7.35 (m, 3H), 7.30–7.22 (m, 2H), 6.12 (t, *J* = 10.1 Hz, 1H), 5.90 (dd, *J* = 10.2, 3.3 Hz, 1H), 5.67 (dd, *J* = 3.2, 1.9 Hz, 1H), 5.01 (d, *J* = 1.6 Hz, 1H), 4.25–4.17 (m, 1H), 3.83–3.66 (m, 5H), 3.58–3.47 (m, 4H), 2.74 (brs, 1H). <sup>13</sup>C NMR (101 MHz, Chloroform-*d*)  $\delta$  166.1, 165.7, 165.6, 133.7, 133.3, 130.1, 130.0, 129.8, 129.5, 129.2, 129.1, 128.7, 128.6, 128.4, 98.9, 73.2, 70.5, 70.1, 70.0, 69.6, 67.1, 61.9, 55.7; HRMS (ESI) *m/z* calcd for C<sub>30</sub>H<sub>34</sub>NO<sub>10</sub> [M+NH<sub>4</sub>]<sup>+</sup> 568.2177, found 568.2174.

**Methyl 2,3,4-tri-*O*-benzoyl-6-*O*-{2-[(1,3-dioxisoindolin-2-yl)oxy]ethyl}- $\alpha$ -D-mannopyranoside (7b)**

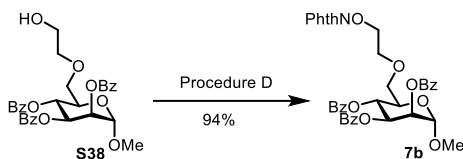

Following the general procedure D, **S38** (1.45 g, 2.63 mmol, 1.0 equiv) was treated with  $\text{PPh}_3$  (828.8 mg, 3.16 mmol, 1.2 equiv), *N*-hydroxyphthalimide (515.5 mg, 3.16 mmol, 1.2 equiv) and diisopropylazodicarboxylate (530  $\mu\text{L}$ , 3.16 mmol, 1.2 equiv) in THF (6.0 mL) to give **7b** (1.72 g, 2.47 mmol, 94%) as a white foam after purification by silica gel column chromatography (PE:EA = 1.5:1).  $[\alpha]_{\text{D}}^{25} = -145.23$  (*c* 1.2,  $\text{CHCl}_3$ );  $^1\text{H NMR}$  (400 MHz, Chloroform-*d*)  $\delta$  8.13–8.04 (m, 2H), 7.98–7.91 (m, 2H), 7.87–7.78 (m, 2H), 7.75–7.66 (m, 4H), 7.62 (t, *J* = 7.4 Hz, 1H), 7.56–7.47 (m, 3H), 7.46–7.32 (m, 2H), 7.26–7.22 (m, 2H), 5.88–5.71 (m, 2H), 5.58 (t, *J* = 1.8 Hz, 1H), 4.70 (d, *J* = 1.5 Hz, 1H), 4.42–4.34 (m, 1H), 4.33–4.26 (m, 1H), 4.20–4.06 (m, 1H), 3.98–3.84 (m, 2H), 3.83–3.67 (m, 2H), 3.39 (s, 3H);  $^{13}\text{C NMR}$  (101 MHz, Chloroform-*d*)  $\delta$  165.9, 165.74, 165.67, 163.6, 134.5, 133.8, 133.5, 133.3, 130.2, 130.0, 129.9, 129.6, 129.44, 129.40, 129.3, 128.9, 128.6, 128.5, 123.6, 98.5, 77.6, 70.7, 70.6, 70.22, 70.20, 70.1, 67.6, 55.5; HRMS (ESI) *m/z* calcd for  $\text{C}_{38}\text{H}_{37}\text{N}_2\text{O}_{12}$   $[\text{M}+\text{NH}_4]^+$  713.2341, found 713.2339.

**6-*O*-{2-[(1,3-dioxisoindolin-2-yl)oxy]ethyl}-1,2,3,4-di-*O*-isopropylidene- $\alpha$ -D-galactopyranose (7c)**

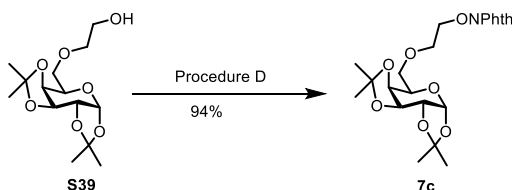

Following the general procedure D, **S39**<sup>[15]</sup> (430.0 mg, 1.41 mmol, 1.0 equiv) was treated with  $\text{PPh}_3$  (443.5 mg, 1.69 mmol, 1.2 equiv), *N*-hydroxyphthalimide (275.1 mg, 1.69 mmol, 1.2 equiv) and diisopropylazodicarboxylate (335  $\mu\text{L}$ , 1.69 mmol, 1.2 equiv) in THF (5.0 mL) to give **7c** (596.3 mg, 1.33 mmol, 94%) as a white foam after purification by silica gel column chromatography (PE:EA = 2:1).  $[\alpha]_{\text{D}}^{25} = -38.89$  (*c* 0.9,  $\text{CHCl}_3$ );  $^1\text{H NMR}$  (400 MHz, Chloroform-*d*)  $\delta$  7.89–7.78 (m, 2H), 7.78–7.71 (m, 2H),

5.48 (d,  $J = 5.0$  Hz, 1H), 4.55 (dd,  $J = 7.9, 2.4$  Hz, 1H), 4.44–4.32 (m, 2H), 4.27 (dd,  $J = 5.0, 2.4$  Hz, 1H), 4.20 (dd,  $J = 7.9, 1.8$  Hz, 1H), 4.03–3.82 (m, 3H), 3.74 (dd,  $J = 10.3, 5.5$  Hz, 1H), 3.63 (dd,  $J = 10.3, 6.8$  Hz, 1H), 1.47 (s, 3H), 1.43 (s, 3H), 1.32 (s, 3H), 1.30 (s, 3H);  $^{13}\text{C}$  NMR (101 MHz, Chloroform- $d$ )  $\delta$  163.5, 134.5, 129.1, 123.6, 109.3, 108.6, 96.4, 77.3, 71.2, 70.7, 70.6, 70.3, 69.5, 66.8, 26.1, 25.0, 24.5; HRMS (ESI)  $m/z$  calcd for  $\text{C}_{22}\text{H}_{31}\text{N}_2\text{O}_9$   $[\text{M}+\text{NH}_4]^+$  467.2024, found 467.2019.

### Preparation of 7d via intermediates S40 and S41

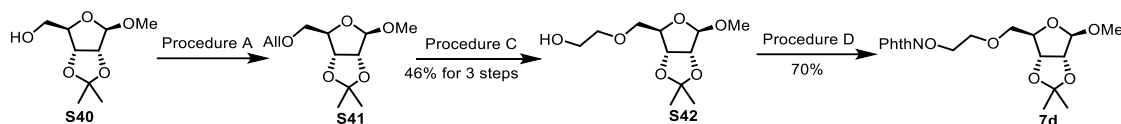

### Methyl 5-O-(2-hydroxyethyl)-2,3-O-isopropylidene- $\beta$ -D-ribofuranoside (S42)

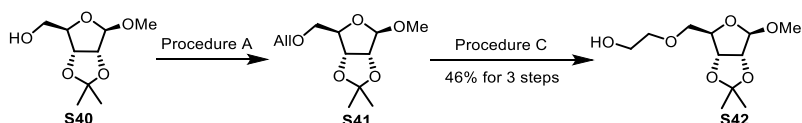

Following the general procedure A, **S40**<sup>[13]</sup> (2.04 g, 10.00 mmol, 1.0 equiv) was treated with AllBr (1.1 mL, 12.00 mmol, 1.2 equiv) and 60% dispersion of NaH in mineral oil (480.0 mg, 12.00 mmol, 1.2 equiv) in DMF (20.0 mL) to give the crude product **S41** without further purification for next step. Following the general procedure C, the obtained crude product (1.0 equiv) was treated with 2,6-lutidine (2.3 mL, 20.00 mmol, 2.0 equiv), OsO<sub>4</sub> (0.0234 mol/L solution in *t*-BuOH, 8.5 mL, 20.0  $\mu\text{mol}$ , 0.02 equiv) and NaIO<sub>4</sub> (8.50 g, 40.00 mmol, 4.0 equiv) in 1,4-dioxane/H<sub>2</sub>O (50.0 mL,  $v/v = 3:1$ ) to give the aldehyde. The aldehyde was treated with NaBH<sub>4</sub> (756.0 mg, 20.00 mmol, 2.0 equiv) in MeOH (50.0 mL) to give **S42** (1.15 g, 4.63 mmol, 46%) as a colorless oil after purification by silica gel column chromatography (PE:EA = 1:1).  $[\alpha]_{\text{D}}^{25} = -50.56$  ( $c$  1.6, CHCl<sub>3</sub>);  $^1\text{H}$  NMR (400 MHz, Chloroform- $d$ )  $\delta$  4.98 (s, 1H), 4.70 (d,  $J = 5.9$  Hz, 1H), 4.59 (d,  $J = 5.9$  Hz, 1H), 4.37 (d,  $J = 6.1$  Hz, 1H), 3.76–3.66 (m, 2H), 3.66–3.46 (m, 4H), 3.35 (s, 3H), 2.71 (brs, 1H), 1.49 (s, 3H), 1.33 (s, 3H);  $^{13}\text{C}$  NMR (101 MHz,



Chloroform-*d*)  $\delta$  112.4, 110.0, 85.5, 85.2, 82.0, 72.5, 72.2, 61.7, 55.1, 26.5, 25.0; HRMS (ESI)  $m/z$  calcd for  $C_{11}H_{20}O_6Na$   $[M+Na]^+$  271.1152, found 271.1156.

**Methyl 5-*O*-{2-[(1,3-dioxoisindolin-2-yl)oxy]ethyl}-2,3-*O*-isopropylidene- $\beta$ -D-ribofuranoside (7d)**

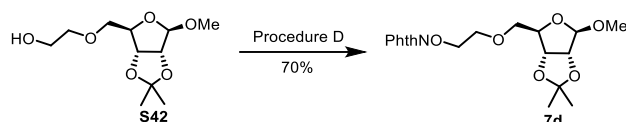

Following the general procedure D, **S42** (1.10 g, 4.40 mmol, 1.0 equiv) was treated with  $PPh_3$  (1.27 g, 4.84 mmol, 1.2 equiv), *N*-hydroxyphthalimide (790.0 mg, 4.84 mmol, 1.2 equiv) and diisopropylazodicarboxylate (960  $\mu$ L, 4.84 mmol, 1.2 equiv) in THF (5.0 mL) to give **7d** (1.21 g, 3.08 mmol, 70%) as a white foam after purification by silica gel column chromatography (PE:EA = 1.5:1).  $[\alpha]_D^{25} = -26.24$  (*c* 1.6,  $CHCl_3$ );  $^1H$  NMR (400 MHz, Chloroform-*d*)  $\delta$  7.89–7.80 (m, 2H), 7.79–7.67 (m, 2H), 4.92 (s, 1H), 4.64 (d, *J* = 6.0 Hz, 1H), 4.54 (d, *J* = 6.0 Hz, 1H), 4.48–4.31 (m, 2H), 4.31–4.15 (m, 1H), 3.92–3.79 (m, 2H), 3.63–3.44 (m, 2H), 3.30 (s, 3H), 1.44 (s, 3H), 1.29 (s, 3H);  $^{13}C$  NMR (101 MHz, Chloroform-*d*)  $\delta$  163.6, 134.6, 129.1, 123.7, 112.4, 109.4, 85.2, 84.9, 82.1, 77.3, 72.3, 69.4, 54.9, 26.5, 25.1; HRMS (ESI)  $m/z$  calcd for  $C_{19}H_{27}N_2O_8$   $[M+NH_4]^+$  411.1762, found 411.1761.

**Preparation of 7e via intermediate S44**

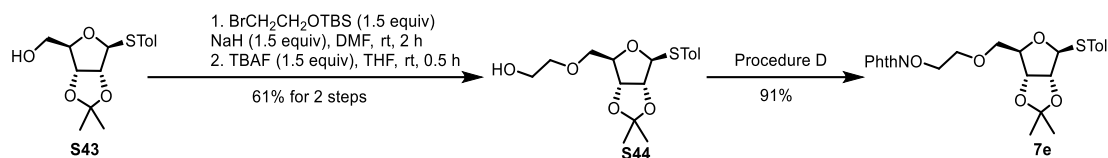

***p*-Tolyl 5-*O*-(2-hydroxyethyl)-2,3-*O*-isopropylidene-1-thio- $\beta$ -D-ribofuranoside (S44)**

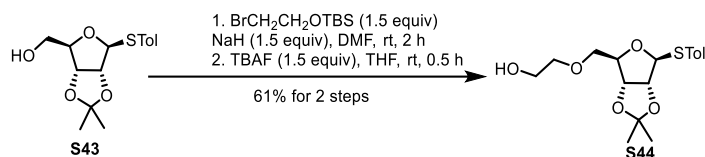

To a solution of **S43**<sup>[14]</sup> (2.60 g, 8.77 mmol, 1.0 equiv) in DMF (30.0 mL) were added (2-bromoethoxy)-*tert*-butyldimethylsilane (2.8 mL, 13.16 mmol, 1.5 equiv), TBAI (325.0 mg, 880.0  $\mu$ mol, 0.1 equiv) and 60% dispersion of NaH in mineral oil (526.0 mg, 13.16 mmol, 1.5 equiv) in ice bath under an argon atmosphere. The resultant solution was stirred at room temperature for 3 h. The reaction was quenched with  $\text{NH}_4\text{Cl}$  solution at 0  $^\circ\text{C}$ . The resultant mixture was extracted with DCM, and the organic layer was washed with brine. The organic layer was collected, dried over  $\text{Na}_2\text{SO}_4$ , filtered off the solid and concentrated *in vacuo* to give the crude product without further purification for next step. To a solution of the crude product obtained as above in THF (10.0 mL) was added TBAF (1 mol/L in THF, 13.1 mL, 13.1 mmol, 1.5 equiv) under an argon atmosphere. After stirring for 0.5 h at room temperature, the reaction mixture was extracted with DCM, and the organic layer was washed with brine. The organic layer was collected, dried over  $\text{Na}_2\text{SO}_4$ , filtered off the solid and concentrated *in vacuo*. The resulting residue was purified by silica gel column chromatography (PE:EA = 2.5:1) to afford **S44** (1.81 g, 5.32 mmol, 61%) as a colorless oil.  $[\alpha]_{\text{D}}^{25} = -107.48$  (*c* 1.4,  $\text{CHCl}_3$ );  $^1\text{H}$  NMR (400 MHz, Chloroform-*d*)  $\delta$  7.44–7.35 (m, 2H), 7.17–7.07 (m, 2H), 5.45 (d,  $J = 2.2$  Hz, 1H), 4.78–4.69 (m, 2H), 4.39–4.30 (m, 1H), 3.77–3.68 (m, 4H), 3.68–3.57 (m, 2H), 2.52 (brs, 1H), 2.32 (s, 3H), 1.50 (s, 3H), 1.34 (s, 3H);  $^{13}\text{C}$  NMR (101 MHz, Chloroform-*d*)  $\delta$  137.9, 132.4, 130.1, 129.9, 113.6, 93.4, 86.1, 85.5, 82.6, 72.9, 71.6, 61.8, 27.1, 25.5, 21.2; HRMS (ESI)  $m/z$  calcd for  $\text{C}_{17}\text{H}_{28}\text{NO}_5\text{S}$   $[\text{M}+\text{NH}_4]^+$  358.1683, found 358.1688.

***p*-Tolyl 5-*O*-{2-[(1,3-dioxisoindolin-2-yl)oxy]ethyl}-2,3-*O*-isopropylidene-1-thio- $\beta$ -D-ribofuranoside (**7e**)**

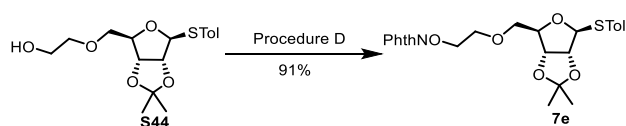

Following the general procedure D, **S43** (435.0 mg, 1.28 mmol, 1.0 equiv) was treated with PPh<sub>3</sub> (403.3 mg, 1.54 mmol, 1.2 equiv), *N*-hydroxyphthalimide (251.0 mg, 1.54 mmol, 1.2 equiv) and diisopropylazodicarboxylate (310 μL, 1.54 mmol, 1.2 equiv) in THF (5.0 mL) to give **7d** (561.1 mg, 1.16 mmol, 91%) as a white foam after purification by silica gel column chromatography (PE:EA = 2:1).  $[\alpha]_D^{25} = -151.40$  (*c* 0.8, CHCl<sub>3</sub>); <sup>1</sup>H NMR (400 MHz, Chloroform-*d*) δ 7.91–7.80 (m, 2H), 7.81–7.72 (m, 2H), 7.43–7.34 (m, 2H), 7.16–7.00 (m, 2H), 5.40 (d, *J* = 1.8 Hz, 1H), 4.88–4.64 (m, 2H), 4.46–4.32 (m, 2H), 4.26 (t, *J* = 6.3 Hz, 1H), 3.98–3.82 (m, 2H), 3.82–3.65 (m, 2H), 2.32 (s, 3H), 1.46 (s, 3H), 1.30 (s, 3H); <sup>13</sup>C NMR (101 MHz, Chloroform-*d*) δ 163.6, 137.7, 134.6, 132.2, 130.5, 129.9, 129.0, 123.7, 113.4, 93.3, 85.9, 85.3, 82.6, 77.3, 71.7, 69.6, 27.0, 25.5, 21.2; HRMS (ESI) *m/z* calcd for C<sub>25</sub>H<sub>31</sub>N<sub>2</sub>O<sub>7</sub>S [M+NH<sub>4</sub>]<sup>+</sup> 503.1846, found 503.1840.

### Preparation of **7f** via intermediate **S46–S49**

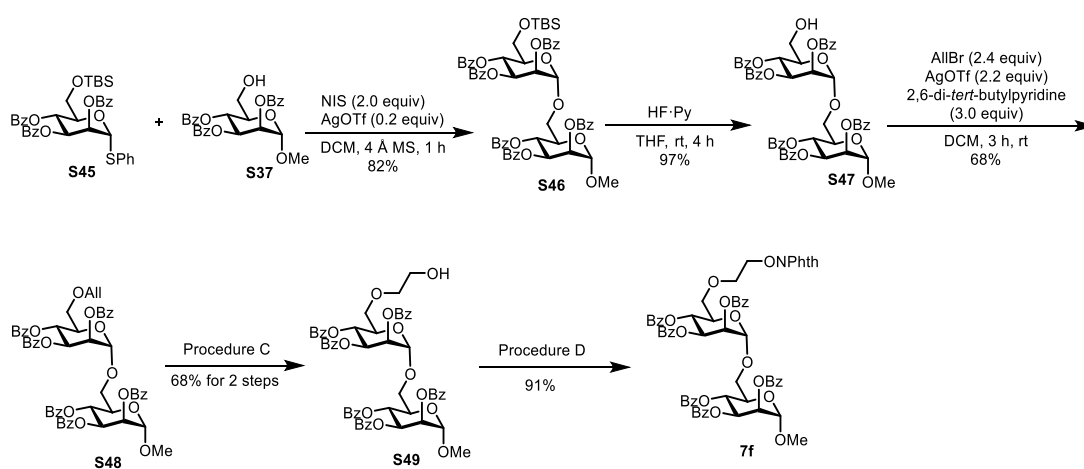

### Methyl 2,3,4-tri-*O*-benzoyl-6-*O*-*tert*-butyldimethylsilyl- $\alpha$ -D-mannopyranosyl-(1→6)-2,3,4-tri-*O*-benzoyl- $\alpha$ -D-mannopyranoside (**S46**)

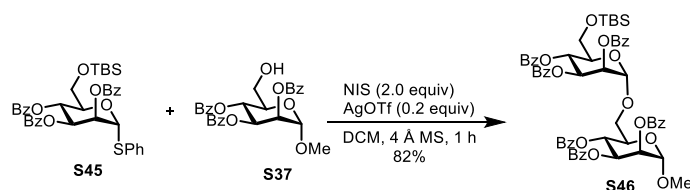

To a solution of **S45**<sup>[12]</sup> (1.05 g, 1.50 mmol, 1.0 equiv), **S37** (1.14 g, 2.25 mmol, 1.5

equiv) and freshly activated 4 Å MS in DCM (10.0 mL) were added *N*-iodosuccinimide (NIS) (675.0 mg, 3.00 mmol, 2.0 equiv) and silver triflate (AgOTf) (77.0 mg, 0.3 mmol, 0.2 equiv) in ice bath under an argon atmosphere. The resultant solution was stirred in ice bath for 1 h. The reaction was quenched with saturated NaHCO<sub>3</sub> solution and Na<sub>2</sub>S<sub>2</sub>O<sub>3</sub> solution in ice bath. The resultant mixture was extracted with DCM, and the organic layer was washed with brine. The organic layer was collected, dried over Na<sub>2</sub>SO<sub>4</sub>, filtered off the solid and concentrated *in vacuo*. The resulting residue was purified by silica gel column chromatography (PE:EA = 9:1) to afford **S46** (1.35 g, 1.23 mmol, 82%) as a white foam.  $[\alpha]_D^{25} = -85.77$  (*c* 2.5, CHCl<sub>3</sub>); <sup>1</sup>H NMR (400 MHz, Chloroform-*d*) δ 8.28–8.19 (m, 2H), 8.18–8.13 (m, 2H), 8.13–8.02 (m, 4H), 7.99–7.88 (m, 4H), 7.68–7.56 (m, 5H), 7.55–7.40 (m, 8H), 7.37–7.32 (m, 5H), 6.13–6.04 (m, 2H), 6.03–5.96 (m, 2H), 5.83–5.79 (m, 2H), 5.25–5.18 (m, 1H), 5.12 (d, *J* = 1.2 Hz, 1H), 4.51–4.43 (m, 1H), 4.24–4.15 (m, 2H), 3.83 (dd, *J* = 10.8, 1.8 Hz, 1H), 3.81–3.73 (m, 2H), 3.71 (s, 3H), 0.91 (s, 9H), 0.04–0.04 (m, 6H); <sup>13</sup>C NMR (101 MHz, Chloroform-*d*) δ 165.8, 165.7, 165.6, 165.5, 165.40, 165.35, 133.51, 133.47, 133.4, 133.21, 133.17, 133.0, 130.0, 129.88, 129.85, 129.77, 129.75, 129.6, 129.5, 129.43, 129.40, 129.2, 129.1, 128.8, 128.54, 128.53, 128.4, 128.3, 98.7, 97.6, 77.3, 71.5, 70.7, 70.6, 70.3, 69.5, 67.2, 66.7, 66.5, 61.9, 55.6, 25.8, 18.2, -5.5; HRMS (ESI) *m/z* calcd for C<sub>61</sub>H<sub>66</sub>NO<sub>17</sub>Si [M+NH<sub>4</sub>]<sup>+</sup> 1112.4095, found 1112.4115.

**Methyl 2,3,4-tri-*O*-benzoyl- $\alpha$ -D-mannopyranosyl-(1→6)-2,3,4-tri-*O*-benzoyl- $\alpha$ -D-mannopyranoside (S47)**

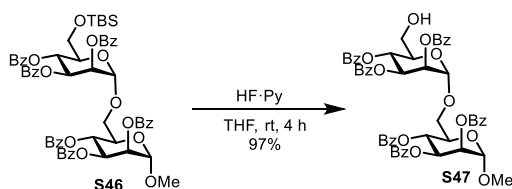

To a solution of **S46** (1.35 g, 1.23 mmol, 1.0 equiv) in THF (10.0 mL) was added HF·Py (1.2 mL) in ice bath under an argon atmosphere. The resultant solution was stirred at room temperature for 4 h. The reaction was quenched with saturated NaHCO<sub>3</sub> solution. The resultant mixture was extracted with DCM, and the organic layer was washed with

brine. The organic layer was collected, dried over Na<sub>2</sub>SO<sub>4</sub>, filtered off the solid and concentrated *in vacuo*. The resulting residue was purified by silica gel column chromatography (PE:EA = 1.5:1) to afford **S47** (1.17 g, 1.19 mmol, 97%) as a white foam.  $[\alpha]_D^{25} = -102.26$  (*c* 1.6, CHCl<sub>3</sub>); <sup>1</sup>H NMR (400 MHz, Chloroform-*d*)  $\delta$  8.20–8.14 (m, 2H), 8.11–8.05 (m, 2H), 8.04–7.99 (m, 2H), 7.99–7.93 (m, 2H), 7.90–7.80 (m, 4H), 7.64–7.51 (m, 5H), 7.51–7.37 (m, 7H), 7.34–7.26 (m, 6H), 6.09–6.00 (m, 2H), 5.92 (dd, *J* = 10.1, 3.3 Hz, 1H), 5.82 (t, *J* = 10.1 Hz, 1H), 5.78–5.70 (m, 2H), 5.17 (d, *J* = 1.4 Hz, 1H), 5.03 (d, *J* = 1.4 Hz, 1H), 4.44–4.33 (m, 1H), 4.08 (dd, *J* = 10.9, 5.5 Hz, 1H), 4.06–4.00 (m, 1H), 3.79 (dd, *J* = 10.9, 2.0 Hz, 1H), 3.68–3.58 (m, 4H), 3.58–3.51 (m, 1H), 2.59 (t, *J* = 6.5 Hz, 1H); <sup>13</sup>C NMR (101 MHz, Chloroform-*d*)  $\delta$  166.6, 165.7, 165.6, 165.5, 165.4, 165.3, 133.7, 133.6, 133.54, 133.50, 133.2, 130.04, 129.99, 129.96, 129.8, 129.7, 129.4, 129.3, 129.2, 129.0, 128.9, 128.8, 128.7, 128.6, 128.5, 128.3, 98.9, 97.8, 71.1, 70.5, 70.2, 69.6, 69.4, 67.2, 67.1, 66.8, 61.1, 55.6; HRMS (ESI) *m/z* calcd for C<sub>55</sub>H<sub>52</sub>NO<sub>17</sub> [M+NH<sub>4</sub>]<sup>+</sup> 998.3230, found 998.3249.

**Methyl 6-*O*-allyl-2,3,4-tri-*O*-benzoyl- $\alpha$ -D-mannopyranosyl-(1→6)-2,3,4-tri-*O*-benzoyl- $\alpha$ -D-mannopyranoside (S48)**

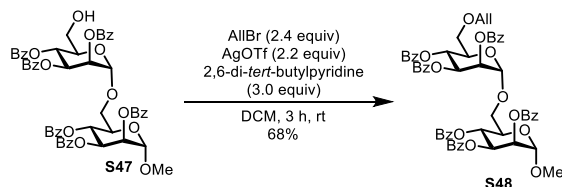

To a solution of **S47** (346.0 mg, 352.7  $\mu$ mol, 1.0 equiv) in DCM (3.0 mL) were added AllBr (72  $\mu$ L, 846.5  $\mu$ mol, 2.4 equiv), AgOTf (198.0 mg, 775.9  $\mu$ mol, 2.2 equiv) and 2,6-di-*tert*-butylpyridine (235  $\mu$ L, 1.06 mmol, 3.0 equiv) in ice bath under an argon atmosphere. The resultant solution was stirred for 3 h at room temperature. The resultant mixture was diluted with DCM and washed with 1M HCl solution and brine. The organic layer was collected, dried over Na<sub>2</sub>SO<sub>4</sub>, filtered off the solid and concentrated *in vacuo*. The resulting residue was purified by silica gel column chromatography (PE:EA = 2:1) to afford **S48** (246.0 mg, 240.9  $\mu$ mol, 68%) as a white foam.  $[\alpha]_D^{25} = -91.83$  (*c* 3.3, CHCl<sub>3</sub>); <sup>1</sup>H NMR (400 MHz, Chloroform-*d*)  $\delta$  8.22–8.14

(m, 2H), 8.13–8.05 (m, 2H), 8.05–7.97 (m, 4H), 7.91–7.80 (m, 4H), 7.61–7.50 (m, 5H), 7.49–7.36 (m, 7H), 7.35–7.25 (m, 6H), 6.07 (t,  $J = 10.1$  Hz, 1H), 5.98–5.90 (m, 3H), 5.79–5.74 (m, 2H), 5.74–5.65 (m, 1H), 5.21–5.10 (m, 2H), 5.10–4.97 (m, 2H), 4.46–4.35 (m, 1H), 4.28–4.20 (m, 1H), 4.14 (dd,  $J = 10.9, 5.6$  Hz, 1H), 3.93–3.74 (m, 3H), 3.63 (s, 3H), 3.56 (dd,  $J = 11.0, 5.2$  Hz, 1H), 3.48 (dd,  $J = 10.9, 2.5$  Hz, 1H);  $^{13}\text{C}$  NMR (101 MHz, Chloroform-*d*)  $\delta$  165.8, 165.6, 165.5, 165.4, 134.4, 133.6, 133.52, 133.48, 133.4, 133.2, 133.1, 130.1, 130.0, 129.92, 129.90, 129.88, 129.8, 129.5, 129.4, 129.2, 129.1, 128.9, 128.6, 128.5, 128.4, 117.0, 98.8, 97.6, 72.4, 70.6, 70.4, 70.34, 70.25, 70.2, 69.5, 68.7, 67.3, 67.1, 66.6, 55.6; HRMS (ESI)  $m/z$  calcd for  $\text{C}_{58}\text{H}_{56}\text{NO}_{17}$   $[\text{M}+\text{NH}_4]^+$  1038.3543, found 1038.3563.

**Methyl 2,3,4-tri-*O*-benzoyl-6-*O*-(2-hydroxyethyl)- $\alpha$ -D-mannopyranosyl-(1 $\rightarrow$ 6)-2,3,4-tri-*O*-benzoyl- $\alpha$ -D-mannopyranoside (S49)**

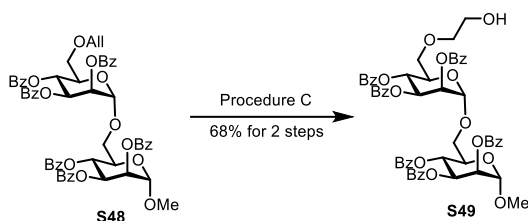

Following the general procedure C, **S48** (1.09 g, 1.07 mmol, 1.0 equiv) was treated with 2,6-lutidine (250  $\mu\text{L}$ , 2.14 mmol, 2.0 equiv),  $\text{OsO}_4$  (0.0234 mol/L solution in *t*-BuOH, 1.0 mL, 22.0 mmol, 0.02 equiv) and  $\text{NaIO}_4$  (920.0 mg, 4.31 mmol, 4.0 equiv) in 1,4-dioxane/ $\text{H}_2\text{O}$  (12.0 mL,  $v/v = 3:1$ ) to give the aldehyde. The aldehyde was treated with  $\text{NaBH}_4$  (40.0 mg, 1.07 mmol, 1.0 equiv) in MeOH (10.0 mL) to give **S49** (739.5 mg, 721.5  $\mu\text{mol}$ , 68%) as a white foam after purification by silica gel column chromatography (PE:EA = 1.5:1).  $[\alpha]_{\text{D}}^{25} = -99.76$  ( $c$  1.9,  $\text{CHCl}_3$ );  $^1\text{H}$  NMR (400 MHz, Chloroform-*d*)  $\delta$  8.20–8.16 (m, 2H), 8.14–8.07 (m, 2H), 8.07–7.96 (m, 4H), 7.94–7.78 (m, 4H), 7.62–7.51 (m, 5H), 7.51–7.37 (m, 7H), 7.37–7.31 (m, 2H), 7.31–7.26 (m, 4H), 6.10 (t,  $J = 10.0$  Hz, 1H), 6.04 (t,  $J = 10.1$  Hz, 1H), 5.99 (dd,  $J = 10.2, 3.3$  Hz, 1H), 5.93 (dd,  $J = 10.1, 3.3$  Hz, 1H), 5.79–5.71 (m, 2H), 5.17 (d,  $J = 1.3$  Hz, 1H), 5.04 (s, 1H), 4.39 (dd,  $J = 9.9, 5.3$  Hz, 1H), 4.22 (d,  $J = 7.4$  Hz, 1H), 4.10 (dd,  $J = 10.9, 5.6$  Hz, 1H), 3.79 (dd,  $J = 10.9, 1.7$  Hz, 1H), 3.73–3.59 (m, 6H), 3.58–3.51 (m, 2H), 3.47–3.35 (m,

1H), 2.68 (s, 1H); <sup>13</sup>C NMR (101 MHz, Chloroform-*d*) δ 166.1, 165.8, 165.7, 165.6, 165.5, 165.4, 133.7, 133.6, 133.3, 133.2, 130.13, 130.05, 130.0, 129.9, 129.8, 129.43, 129.42, 129.3, 129.24, 129.16, 129.1, 128.9, 128.7, 128.6, 128.4, 98.9, 97.8, 73.1, 70.6, 70.4, 70.3, 70.1, 70.0, 69.5, 69.2, 67.1, 67.0, 66.8, 61.8, 55.7; HRMS (ESI) *m/z* calcd for C<sub>57</sub>H<sub>56</sub>NO<sub>18</sub> [M+NH<sub>4</sub>]<sup>+</sup> 1042.3492, found 1042.3523.

**Methyl 2,3,4-tri-*O*-benzoyl-6-*O*-{2-[(1,3-dioxoisindolin-2-yl)oxy]ethyl}- $\alpha$ -D-mannopyranosyl-(1 $\rightarrow$ 6)-2,3,4-tri-*O*-benzoyl- $\alpha$ -D-mannopyranoside (7f)**

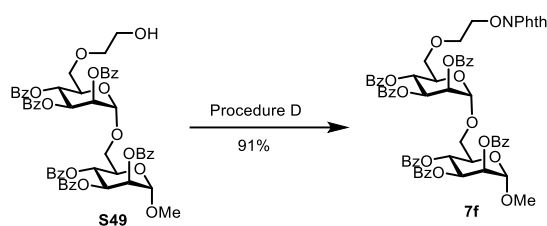

Following the general procedure D, **S49** (653.0 mg, 637.1  $\mu$ mol, 1.0 equiv) was treated with PPh<sub>3</sub> (201.9 mg, 770.0  $\mu$ mol, 1.2 equiv), *N*-hydroxyphthalimide (125.6 mg, 770.0  $\mu$ mol, 1.2 equiv) and diisopropylazodicarboxylate (150  $\mu$ L, 770.0  $\mu$ mol, 1.2 equiv) in THF (5.0 mL) to give **7f** (674.1 mg, 576.1  $\mu$ mol, 91%) as a white foam after purification by silica gel column chromatography (PE:EA = 1.5:1). [ $\alpha$ ]<sub>D</sub><sup>25</sup> = -89.28 (*c* 1.8, CHCl<sub>3</sub>); <sup>1</sup>H NMR (400 MHz, Chloroform-*d*) δ 8.24–8.14 (m, 2H), 8.12–8.03 (m, 2H), 8.03–7.95 (m, 4H), 7.90–7.76 (m, 4H), 7.74–7.58 (m, 5H), 7.58–7.47 (m, 6H), 7.46–7.40 (m, 3H), 7.39–7.34 (m, 2H), 7.33–7.26 (m, 6H), 6.07 (t, *J* = 10.1 Hz, 1H), 5.97–5.88 (m, 2H), 5.81 (t, *J* = 10.0 Hz, 1H), 5.76 (d, *J* = 1.5 Hz, 1H), 5.69 (d, *J* = 2.9 Hz, 1H), 5.05 (s, 1H), 4.83 (s, 1H), 4.38 (dd, *J* = 10.0, 3.6 Hz, 1H), 4.26–4.10 (m, 3H), 4.05 (dd, *J* = 11.0, 5.3 Hz, 1H), 3.78–3.67 (m, 1H), 3.67–3.46 (m, 7H); <sup>13</sup>C NMR (101 MHz, Chloroform-*d*) δ 166.0, 165.9, 165.8, 165.7, 165.6, 165.5, 163.5, 134.5, 133.8, 133.7, 133.64, 133.56, 133.4, 133.3, 130.3, 130.2, 130.1, 130.0, 129.6, 129.5, 129.43, 129.40, 129.3, 129.0, 128.9, 128.71, 128.65, 128.5, 123.6, 99.0, 97.6, 77.7, 70.7, 70.6, 70.5, 70.3, 70.11, 70.08, 69.7, 69.6, 67.4, 67.2, 66.6, 55.8; HRMS (ESI) *m/z* calcd for C<sub>65</sub>H<sub>59</sub>N<sub>2</sub>O<sub>20</sub> [M+NH<sub>4</sub>]<sup>+</sup> 1187.3656, found 1187.3689.

## Synthesis of branched-chain sugars and higher-carbon sugars

### General Procedure E:

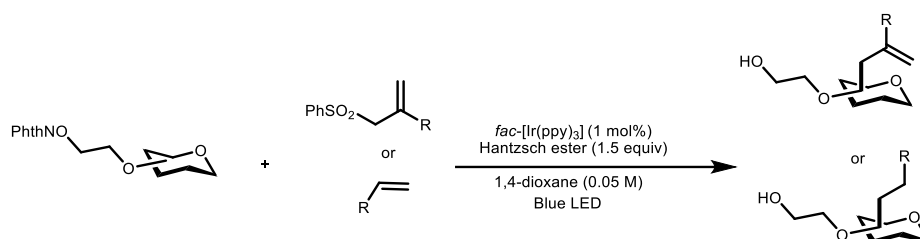

A mixture of sugar-based *N*-alkoxyphthalimide (1.0 equiv), radical acceptor (3.0 equiv), Hantzsch ester (1.5 equiv) and *fac*-Ir(ppy)<sub>3</sub> (0.01 equiv) was placed in a 10 mL of clear-colored glass reaction tube. 1,4-Dioxane was added into the tube to result in 0.05 M of a mixture, then the mixture was evacuated and backfilled with argon for three times. After stirring for 3 h at 35 °C under the irradiation of blue LEDs (450 nm-470 nm), the mixture was diluted with CH<sub>2</sub>Cl<sub>2</sub>, and sequentially washed with saturated NaHCO<sub>3</sub> solution and brine. The organic layer was collected, dried over anhydrous Na<sub>2</sub>SO<sub>4</sub>, filtered off the solid, and concentrated *in vacuo*. The residue was purified by flash silica gel column chromatography to give the desired product.

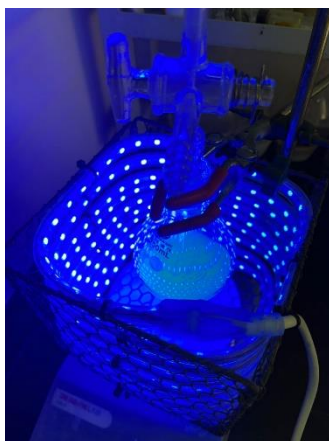

**Methyl 2,3,6-tri-*O*-benzoyl-4-*O*-(2-hydroxyethyl)-4-*C*-[2-(methoxycarbonyl)allyl]- $\alpha$ -D-galactopyranoside (3a) and Methyl 2,3,6-tri-*O*-benzoyl-4-*O*-(2-hydroxyethyl)-4-*C*-[2-(methoxycarbonyl)allyl]- $\alpha$ -D-glucopyranoside (3a')**



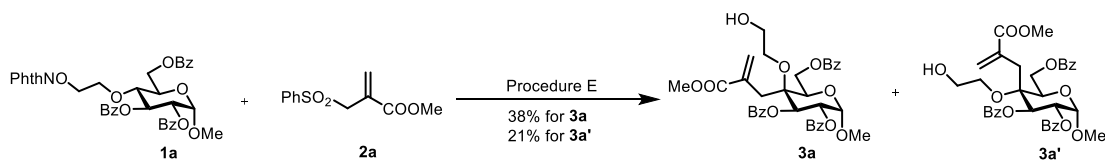

Following the general procedure E, **1a** (139.2 mg, 200.0  $\mu\text{mol}$ , 1.0 equiv) and **2a** (152.7 mg, 600.5  $\mu\text{mol}$ , 3.0 equiv) were treated with hantzsch ester (76.1 mg, 300.4  $\mu\text{mol}$ , 1.5 equiv) and *fac*-Ir(ppy)<sub>3</sub> (1.3 mg, 2.0  $\mu\text{mol}$ , 0.01 equiv) in 1,4-dioxane (4.0 mL) to give **3a** (49.0 mg, 75.6  $\mu\text{mol}$ , 38%) and **3a'** (27.6 mg, 42.6  $\mu\text{mol}$ , 21%) as white foam after purification by silica gel column chromatography (PE:EA = 1.5:1).

For **3a**:  $[\alpha]_{\text{D}}^{25} = +25.91$  (*c* 3.0, CHCl<sub>3</sub>); <sup>1</sup>H NMR (400 MHz, Chloroform-*d*)  $\delta$  8.09–8.03 (m, 2H), 8.01–7.94 (m, 2H), 7.94–7.88 (m, 2H), 7.60–7.30 (m, 9H), 6.37 (s, 1H), 5.99 (d, *J* = 10.5 Hz, 1H), 5.94 (s, 1H), 5.55 (dd, *J* = 10.5, 3.6 Hz, 1H), 5.19 (d, *J* = 3.6 Hz, 1H), 4.96 (dd, *J* = 12.0, 1.4 Hz, 1H), 4.61 (dd, *J* = 12.0, 8.4 Hz, 1H), 4.28–4.18 (m, 2H), 4.07–3.98 (m, 1H), 3.94–3.81 (m, 2H), 3.62 (s, 3H), 3.39 (s, 3H), 3.13 (d, *J* = 14.2 Hz, 1H), 2.87 (d, *J* = 14.3 Hz, 1H), 2.47 (s, 1H); <sup>13</sup>C NMR (101 MHz, Chloroform-*d*)  $\delta$  137.8, 166.6, 166.1, 160.0, 134.6, 133.5, 133.3, 133.2, 130.8, 130.0, 129.9, 129.8, 129.7, 129.5, 129.2, 128.64, 128.55, 128.4, 96.9, 79.9, 71.7, 71.2, 70.9, 67.1, 64.3, 62.6, 55.4, 52.4, 32.3; HRMS (ESI) *m/z* calcd for C<sub>35</sub>H<sub>40</sub>NO<sub>12</sub> [M+NH<sub>4</sub>]<sup>+</sup> 666.2545, found 666.2542.

For **3a'**:  $[\alpha]_{\text{D}}^{25} = +99.25$  (*c* 0.8, CHCl<sub>3</sub>); <sup>1</sup>H NMR (400 MHz, Chloroform-*d*)  $\delta$  8.09–8.01 (m, 4H), 7.97–7.91 (m, 2H), 7.61–7.55 (m, 1H), 7.54–7.43 (m, 4H), 7.42–7.32 (m, 4H), 6.14 (d, *J* = 10.4 Hz, 1H), 6.06 (d, *J* = 1.3 Hz, 1H), 5.71 (s, 1H), 5.35 (dd, *J* = 10.4, 4.0 Hz, 1H), 5.19 (d, *J* = 4.0 Hz, 1H), 4.78–4.71 (m, 1H), 4.60–4.52 (m, 2H), 3.94–3.88 (m, 1H), 3.83–3.75 (m, 1H), 3.71–3.63 (m, 1H), 3.63–3.55 (m, 1H), 3.55–3.43 (m, 5H), 3.36 (s, 3H), 2.97 (d, *J* = 14.2 Hz, 1H), 2.38 (s, 1H); <sup>13</sup>C NMR (101 MHz, Chloroform-*d*)  $\delta$  170.2, 166.5, 166.0, 165.8, 138.3, 133.5, 133.4, 130.0, 129.9, 129.8, 129.7, 129.5, 129.1, 128.6, 128.5, 126.7, 96.7, 78.7, 71.5, 69.7, 68.9, 64.0, 62.8, 62.1, 55.3, 51.8, 32.2; HRMS (ESI) *m/z* calcd for C<sub>35</sub>H<sub>40</sub>NO<sub>12</sub> [M+NH<sub>4</sub>]<sup>+</sup> 666.2545, found 666.2547.

**Methyl 2,3-di-O-benzoyl-6-O-tert-butylidiphenylsilyl-4-O-(2-hydroxyethyl)-4-C-**

### [2-(methoxycarbonyl)allyl]- $\alpha$ -D-talopyranoside (**3c**)

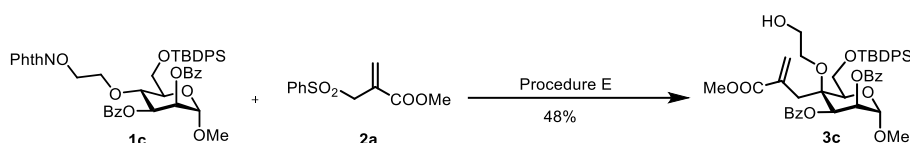

Following the general procedure E, **1c** (166.0 mg, 200.2  $\mu$ mol, 1.0 equiv) and **2a** (152.7 mg, 603.6  $\mu$ mol, 3.0 equiv) were treated with hantzsch ester (76.3 mg, 301.3  $\mu$ mol, 1.5 equiv) and *fac*-Ir(ppy)<sub>3</sub> (1.3 mg, 2.0  $\mu$ mol, 0.01 equiv) in 1,4-dioxane (4.0 mL) to give **3c** (74.6 mg, 95.4  $\mu$ mol, 48%) as a white foam after purification by silica gel column chromatography (PE:EA = 2:1).  $[\alpha]_{\text{D}}^{25} = -43.32$  (*c* 2.8, CHCl<sub>3</sub>); <sup>1</sup>H NMR (400 MHz, Chloroform-*d*)  $\delta$  8.00–7.94 (m, 2H), 7.90–7.85 (m, 2H), 7.81–7.73 (m, 4H), 7.57–7.50 (m, 2H), 7.48–7.34 (m, 10H), 6.26 (s, 1H), 5.64 (s, 1H), 5.55–5.49 (m, 2H), 4.91 (d, *J* = 2.4 Hz, 1H), 4.23–4.16 (m, 1H), 4.16–4.10 (m, 2H), 3.82–3.74 (m, 2H), 3.59 (s, 3H), 3.57–3.53 (m, 1H), 3.52–3.44 (m, 4H), 3.13 (d, *J* = 14.3 Hz, 1H), 2.60 (d, *J* = 14.3 Hz, 1H), 2.09 (s, 1H), 1.09 (s, 9H); <sup>13</sup>C NMR (101 MHz, Chloroform-*d*)  $\delta$  167.6, 165.9, 165.5, 135.9, 135.8, 135.5, 133.6, 133.4, 133.3, 130.0, 129.9, 129.8, 129.7, 128.6, 128.5, 127.9, 127.8, 98.6, 77.2, 75.5, 70.4, 69.1, 65.7, 62.8, 62.4, 55.5, 52.4, 32.4, 26.9, 19.3; HRMS (ESI) *m/z* calcd for C<sub>44</sub>H<sub>50</sub>O<sub>11</sub>SiNa [M+Na]<sup>+</sup> 805.3015, found 805.3019.

### Methyl 2,3-di-*O*-benzoyl-4-*O*-(2-hydroxyethyl)-4-*C*-[2-(methoxycarbonyl)allyl]- $\alpha$ -D-talopyranoside (**3d**)

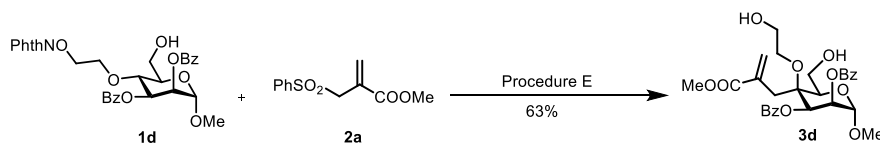

Following the general procedure E, **1d** (118.3 mg, 200.0  $\mu$ mol, 1.0 equiv) and **2a** (152.7 mg, 603.6  $\mu$ mol, 3.0 equiv) were treated with hantzsch ester (76.3 mg, 301.3  $\mu$ mol, 1.5 equiv) and *fac*-Ir(ppy)<sub>3</sub> (1.3 mg, 2.0  $\mu$ mol, 0.01 equiv) in 1,4-dioxane (4.0 mL) to give **3d** (68.5 mg, 125.9  $\mu$ mol, 63%) as a white foam after purification by silica gel column chromatography (PE:EA = 1:2).  $[\alpha]_{\text{D}}^{25} = -14.8$  (*c* 2.4, CHCl<sub>3</sub>); <sup>1</sup>H NMR (400 MHz, Chloroform-*d*)  $\delta$  8.05–7.98 (m, 2H), 7.93–7.87 (m, 2H), 7.58–7.51 (m, 2H), 7.44–7.36 (m, 4H), 6.34 (s, 1H), 5.67 (s, 1H), 5.59 (dd, *J* = 3.7, 1.8 Hz, 1H), 5.48 (d, *J* = 3.8 Hz,

1H), 4.90 (d,  $J = 1.6$  Hz, 1H), 4.19 (dd,  $J = 11.9, 5.7$  Hz, 1H), 4.10 (dd,  $J = 12.1, 2.9$  Hz, 1H), 4.01–3.94 (m, 1H), 3.94–3.86 (m, 2H), 3.79–3.70 (m, 1H), 3.69 (s, 3H), 3.66–3.59 (m, 1H), 3.42 (s, 3H), 3.17 (d,  $J = 14.0$  Hz, 1H), 2.97 (s, 1H), 2.75 (d,  $J = 14.0$  Hz, 1H), 2.19 (s, 1H);  $^{13}\text{C}$  NMR (101 MHz, Chloroform-*d*)  $\delta$  167.7, 165.9, 165.5, 135.2, 133.5, 131.0, 130.0, 129.7, 129.6, 128.7, 128.5, 99.1, 78.0, 73.2, 70.1, 68.9, 66.0, 62.3, 61.7, 55.5, 52.6, 32.1; HRMS (ESI)  $m/z$  calcd for  $\text{C}_{28}\text{H}_{32}\text{O}_{11}\text{Na}$   $[\text{M}+\text{Na}]^+$  567.1837, found 567.1824.

**Methyl 2,3,6-tri-*O*-benzoyl-4-*O*-(2-hydroxyethyl)-4-*C*-[2-(methoxycarbonyl)allyl]- $\alpha$ -D-talopyranoside (**3e**)**

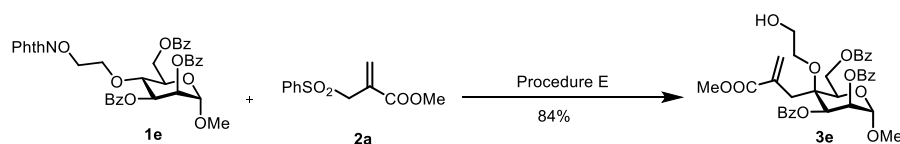

Following the general procedure E, **1e** (139.0 mg, 200.0  $\mu\text{mol}$ , 1.0 equiv) and **2a** (152.6 mg, 600.0  $\mu\text{mol}$ , 3.0 equiv) were treated with hantzsch ester (75.9 mg, 300.0  $\mu\text{mol}$ , 1.5 equiv) and *fac*-Ir(ppy)<sub>3</sub> (1.3 mg, 2.0  $\mu\text{mol}$ , 0.01 equiv) in 1,4-dioxane (4.0 mL) to give **3e** (108.8 mg, 167.8  $\mu\text{mol}$ , 84%) as a white foam after purification by silica gel column chromatography (PE:EA = 1.5:1).

**Procedure for Scale Preparation of Compound 3e**

Following the general procedure E, **1e** (4.18 g, 6.00 mmol, 1.0 equiv) and **2a** (4.58 g, 18.00 mmol, 3.0 equiv) were treated with hantzsch ester (2.28 g, 9.0 mmol, 1.5 equiv) and *fac*-Ir(ppy)<sub>3</sub> (39.3 mg, 60.0  $\mu\text{mol}$ , 0.01 equiv) in 1,4-dioxane (60.0 mL) to give **3e** (2.27 g, 3.50 mmol, 58%) as a white foam after purification by silica gel column chromatography (PE:EA = 2:1).  $[\alpha]_{\text{D}}^{25} = +47.08$  ( $c$  1.4,  $\text{CHCl}_3$ );  $^1\text{H}$  NMR (400 MHz, Chloroform-*d*)  $\delta$  8.08 (d,  $J = 7.3$  Hz, 2H), 8.02–7.92 (m, 4H), 7.61–7.51 (m, 3H), 7.49–7.36 (m, 6H), 6.40 (s, 1H), 5.81 (s, 1H), 5.64 (d,  $J = 3.6$  Hz, 1H), 5.59–5.52 (m, 1H), 4.96 (d,  $J = 2.5$  Hz, 1H), 4.95–4.85 (m, 2H), 4.33–4.23 (m, 1H), 4.01–3.82 (m, 2H), 3.76–3.67 (m, 1H), 3.67–3.60 (m, 4H), 3.43 (s, 3H), 3.24 (d,  $J = 14.4$  Hz, 1H), 2.84 (d,  $J = 14.4$  Hz, 1H), 2.28 (brs, 1H);  $^{13}\text{C}$  NMR (101 MHz, Chloroform-*d*)  $\delta$  167.4, 166.7, 165.8, 165.5, 135.0, 133.43, 133.42, 133.2, 130.8, 130.0, 129.9, 129.7, 129.6, 129.50,

129.46, 128.7, 128.5, 128.4, 98.5, 77.3, 72.3, 70.1, 69.0, 66.0, 63.7, 62.4, 55.5, 52.4, 32.3; HRMS (ESI)  $m/z$  calcd for  $C_{35}H_{40}NO_{12}$   $[M+NH_4]^+$  666.2545, found 666.2549.

**Methyl {methyl 2,3-di-*O*-benzoyl-4-*O*-(2-Hydroxyethyl)-4-*C*-[2-(methoxycarbonyl)allyl]- $\alpha$ -D-talopyranosyluronate} (3f)**

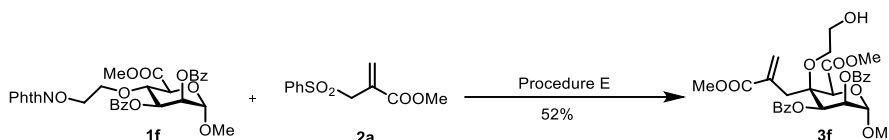

Following the general procedure E, **1f** (62.3 mg, 100.2  $\mu$ mol, 1.0 equiv) and **2a** (76.0 mg, 300.0  $\mu$ mol, 3.0 equiv) were treated with hantzsch ester (38.0 mg, 150.0  $\mu$ mol, 1.5 equiv) and *fac*-Ir(ppy)<sub>3</sub> (0.7 mg, 1.0  $\mu$ mol, 0.01 equiv) in 1,4-dioxane (2.0 mL) to give **3f** (32.1 mg, 51.9  $\mu$ mol, 52%) as a white foam after purification by silica gel column chromatography (PE:EA = 1.5:1).  $[\alpha]_D^{25} = -2.38$  ( $c$  0.5,  $CHCl_3$ );  $^1H$  NMR (400 MHz, Chloroform-*d*)  $\delta$  8.00–7.95 (m, 2H), 7.94–7.89 (m, 2H), 7.60–7.51 (m, 2H), 7.46–7.35 (m, 4H), 6.40 (s, 1H), 6.00 (s, 1H), 5.60–5.47 (m, 2H), 5.23 (s, 1H), 4.66 (s, 1H), 3.91 (dd,  $J = 6.1, 3.5$  Hz, 1H), 3.89–3.80 (m, 4H), 3.73–3.64 (m, 4H), 3.61–3.56 (m, 1H), 3.51 (s, 3H), 3.36 (d,  $J = 14.3$  Hz, 1H), 2.98 (d,  $J = 14.2$  Hz, 1H), 2.56 (brs, 1H);  $^{13}C$  NMR (101 MHz, Chloroform-*d*)  $\delta$  169.3, 167.5, 165.6, 165.5, 136.0, 135.2, 133.4, 133.3, 130.5, 129.9, 129.7, 129.6, 129.4, 128.6, 128.4, 99.0, 72.7, 69.8, 68.5, 65.2, 62.0, 56.3, 52.6, 52.4, 31.7; HRMS (ESI)  $m/z$  calcd for  $C_{29}H_{36}NO_{12}$   $[M+NH_4]^+$  590.2232, found 590.2233.

**Methyl 2,3-di-*O*-benzoyl-6-*O*-{3 $\alpha$ -acetyloxy-5 $\beta$ -cholan-24-oate}-4-*O*-(2-hydroxyethyl)-4-*C*-[2-(methoxycarbonyl)allyl]- $\alpha$ -D-talopyranoside (3g)**

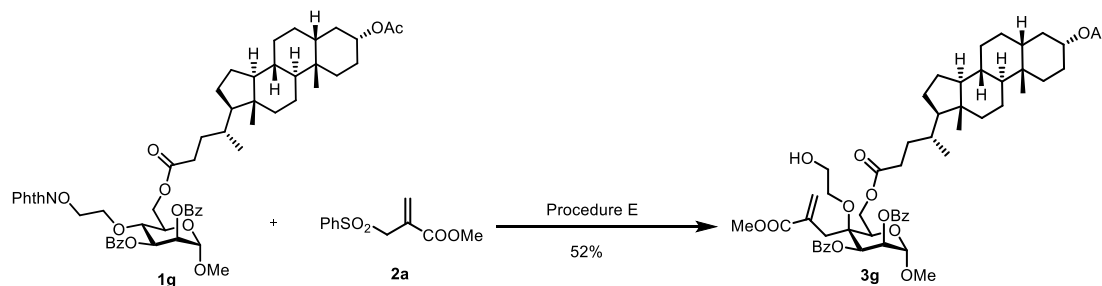

Following the general procedure E, **1g** (198.2 mg, 199.9  $\mu$ mol, 1.0 equiv) and **2a** (152.7

mg, 603.6  $\mu\text{mol}$ , 3.0 equiv) were treated with hantzsch ester (76.3 mg, 301.3  $\mu\text{mol}$ , 1.5 equiv) and *fac*-Ir(ppy)<sub>3</sub> (1.3 mg, 2.0  $\mu\text{mol}$ , 0.01 equiv) in 1,4-dioxane (4.0 mL) to give **3g** (99.1 mg, 104.5  $\mu\text{mol}$ , 52%) as a white foam after purification by silica gel column chromatography (PE:EA = 2:1).  $[\alpha]_{\text{D}}^{25} = +39.83$  (*c* 2.4, CHCl<sub>3</sub>); <sup>1</sup>H NMR (400 MHz, Chloroform-*d*)  $\delta$  8.01–7.96 (m, 2H), 7.96–7.92 (m, 2H), 7.60–7.51 (m, 2H), 7.46–7.37 (m, 4H), 6.38 (s, 1H), 5.77 (s, 1H), 5.57 (d, *J* = 3.6 Hz, 1H), 5.56–5.53 (m, 1H), 4.92 (d, *J* = 2.3 Hz, 1H), 4.77–4.58 (m, 3H), 4.12 (d, *J* = 8.6 Hz, 1H), 4.03–3.82 (m, 2H), 3.78–3.67 (m, 4H), 3.66–3.60 (m, 1H), 3.44 (s, 3H), 3.22 (d, *J* = 14.4 Hz, 1H), 2.75 (d, *J* = 14.3 Hz, 1H), 2.46–2.37 (m, 1H), 2.35–2.22 (m, 2H), 2.03 (s, 3H), 2.01–1.94 (m, 1H), 1.90–1.78 (m, 5H), 1.73–1.65 (m, 1H), 1.61–1.49 (m, 2H), 1.49–1.34 (m, 8H), 1.31–1.17 (m, 4H), 1.16–0.97 (m, 6H), 0.95–0.90 (m, 6H), 0.65 (s, 3H); <sup>13</sup>C NMR (101 MHz, Chloroform-*d*)  $\delta$  174.4, 170.7, 167.4, 165.8, 165.5, 135.0, 133.4, 130.7, 129.9, 129.7, 129.4, 128.6, 128.4, 98.4, 77.1, 74.4, 72.2, 70.0, 68.9, 65.9, 63.0, 62.3, 56.5, 56.0, 55.4, 52.4, 42.8, 41.9, 40.4, 40.2, 35.8, 35.4, 35.0, 34.6, 32.2, 32.2, 31.3, 31.0, 28.2, 27.0, 26.6, 26.3, 24.2, 23.4, 21.5, 20.8, 18.3, 12.1; HRMS (ESI) *m/z* calcd for C<sub>54</sub>H<sub>76</sub>NO<sub>14</sub> [M+NH<sub>4</sub>]<sup>+</sup> 962.5260, found 962.5281.

**Methyl 2,3-di-*O*-benzoyl-6-*O*-[4-(*N,N*-dipropylsulfamoyl)benzoyl]-4-*O*-(2-hydroxyethyl)-4-*C*-[2-(methoxycarbonyl)allyl]- $\alpha$ -D-talopyranoside (**3h**)**

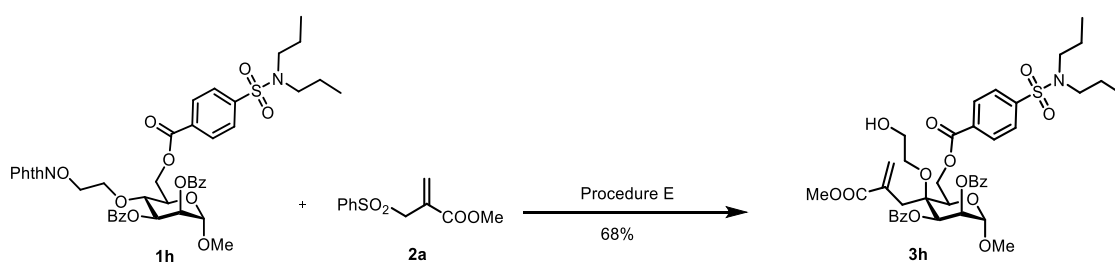

Following the general procedure E, **1h** (171.8 mg, 200.2  $\mu\text{mol}$ , 1.0 equiv) and **2a** (152.7 mg, 603.6  $\mu\text{mol}$ , 3.0 equiv) were treated with hantzsch ester (76.3 mg, 301.3  $\mu\text{mol}$ , 1.5 equiv) and *fac*-Ir(ppy)<sub>3</sub> (1.3 mg, 2.0  $\mu\text{mol}$ , 0.01 equiv) in 1,4-dioxane (4.0 mL) to give **3h** (110.2 mg, 135.8  $\mu\text{mol}$ , 68%) as a white foam after purification by silica gel column chromatography (PE:EA = 2:1).  $[\alpha]_{\text{D}}^{25} = +51.83$  (*c* 1.8, CHCl<sub>3</sub>); <sup>1</sup>H NMR (400 MHz, Chloroform-*d*)  $\delta$  8.21–8.16 (m, 2H), 8.02–7.98 (m, 2H), 7.98–7.94 (m, 2H), 7.92–7.88

(m, 2H), 7.62–7.52 (m, 2H), 7.47–7.37 (m, 4H), 6.41 (s, 1H), 5.80 (s, 1H), 5.65 (d,  $J = 3.6$  Hz, 1H), 5.59–5.55 (m, 1H), 5.00–4.89 (m, 3H), 4.30–4.24 (m, 1H), 4.01–3.88 (m, 2H), 3.78–3.71 (m, 1H), 3.69–3.61 (m, 4H), 3.43 (s, 3H), 3.23 (d,  $J = 14.4$  Hz, 1H), 3.15–3.08 (m, 4H), 2.84 (d,  $J = 14.3$  Hz, 1H), 2.25 (brs, 1H), 1.62–1.49 (m, 4H), 0.93–0.83 (m, 6H);  $^{13}\text{C}$  NMR (101 MHz, Chloroform-*d*)  $\delta$  167.4, 165.8, 165.5, 165.3, 144.5, 134.9, 133.5, 133.3, 131.0, 130.2, 129.9, 129.7, 129.4, 129.3, 128.7, 128.5, 127.1, 98.5, 77.3, 72.2, 70.0, 68.9, 66.0, 64.4, 62.4, 52.5, 49.9, 32.3, 22.0, 11.2; HRMS (ESI)  $m/z$  calcd for  $\text{C}_{41}\text{H}_{49}\text{NO}_{14}\text{NaS}$   $[\text{M}+\text{Na}]^+$  834.2766, found 834.2778.

**Methyl 2,3-di-*O*-benzoyl-4-*O*-(2-hydroxyethyl)-4-*C*-[2-(methoxycarbonyl)allyl]-6-*O*-{2-(*S*)-(6-methoxynaphthalen-2-yl)propanoyl}- $\alpha$ -D-talopyranoside (**3i**)**

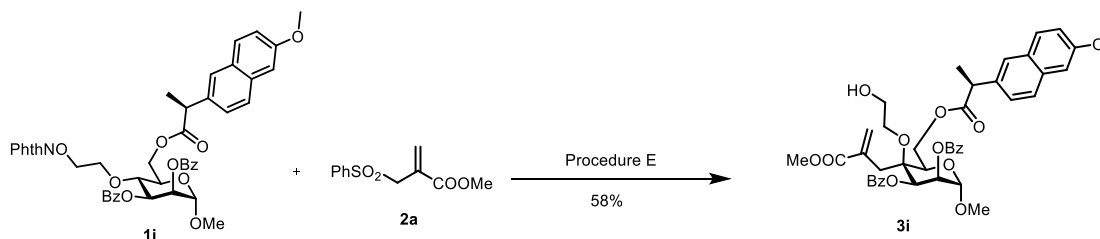

Following the general procedure E, **1i** (160.8 mg, 200.2  $\mu\text{mol}$ , 1.0 equiv) and **2a** (152.7 mg, 603.6  $\mu\text{mol}$ , 3.0 equiv) were treated with hantzsch ester (76.3 mg, 301.3  $\mu\text{mol}$ , 1.5 equiv) and *fac*-Ir(ppy)<sub>3</sub> (1.3 mg, 2.0  $\mu\text{mol}$ , 0.01 equiv) in 1,4-dioxane (4.0 mL) to give **3i** (87.8 mg, 116.1  $\mu\text{mol}$ , 58%) as a white foam after purification by silica gel column chromatography (PE:EA = 5:1).  $[\alpha]_{\text{D}}^{25} = +20.18$  (*c* 3.1,  $\text{CHCl}_3$ );  $^1\text{H}$  NMR (400 MHz, Chloroform-*d*)  $\delta$  7.98–7.94 (m, 2H), 7.93–7.89 (m, 2H), 7.73–7.63 (m, 3H), 7.58–7.49 (m, 2H), 7.44–7.35 (m, 5H), 7.13 (dd,  $J = 8.9, 2.5$  Hz, 1H), 7.09 (d,  $J = 2.3$  Hz, 1H), 6.32 (s, 1H), 5.70 (s, 1H), 5.51 (d,  $J = 3.5$  Hz, 1H), 5.48–5.45 (m, 1H), 4.74 (d,  $J = 2.3$  Hz, 1H), 4.70–4.62 (m, 2H), 4.06–3.99 (m, 1H), 3.95–3.82 (m, 6H), 3.74–3.66 (m, 1H), 3.66–3.57 (m, 4H), 3.15 (d,  $J = 14.3$  Hz, 1H), 2.96 (s, 3H), 2.70 (d,  $J = 14.3$  Hz, 1H), 2.23 (s, 1H), 1.62 (d,  $J = 7.2$  Hz, 3H);  $^{13}\text{C}$  NMR (101 MHz, Chloroform-*d*)  $\delta$  174.8, 167.4, 165.8, 165.5, 157.7, 135.5, 134.9, 133.8, 133.5, 130.8, 130.0, 129.7, 129.5, 129.2, 129.0, 128.7, 128.5, 127.2, 126.3, 126.1, 119.1, 105.6, 98.3, 77.1, 72.1, 70.0, 68.9, 65.9, 63.6, 62.4, 55.4, 54.9, 52.4, 45.6, 32.2, 18.6; HRMS (ESI)  $m/z$  calcd for  $\text{C}_{42}\text{H}_{44}\text{O}_{13}\text{Na}$   $[\text{M}+\text{Na}]^+$  779.2674, found 779.2665.

***p*-Tolyl 4-*O*-(2-hydroxyethyl)-2,3-*O*-isopropylidene-4-*C*-[2-(methoxycarbonyl)-allyl]-1-thio- $\alpha$ -*L*-talopyranoside (**3j**)**

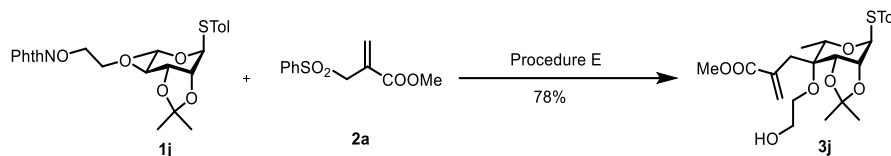

Following the general procedure E, **1j** (100.3 mg, 200.0  $\mu$ mol, 1.0 equiv) and **2a** (152.3 mg, 598.7  $\mu$ mol, 3.0 equiv) were treated with hantzsch ester (76.3 mg, 301.3  $\mu$ mol, 1.5 equiv) and *fac*-Ir(ppy)<sub>3</sub> (1.3 mg, 2.0  $\mu$ mol, 0.01 equiv) in 1,4-dioxane (4.0 mL) to give **3j** (70.3 mg, 155.5  $\mu$ mol, 78%) as a white foam after purification by silica gel column chromatography (PE:EA = 2:1).  $[\alpha]_D^{25} = -52.56$  (*c* 0.4, CHCl<sub>3</sub>); <sup>1</sup>H NMR (400 MHz, Chloroform-*d*)  $\delta$  7.55–7.41 (m, 2H), 7.18–7.05 (m, 2H), 6.31 (s, 1H), 5.74 (s, 1H), 4.83 (d, *J* = 9.1 Hz, 1H), 4.30 (d, *J* = 4.9 Hz, 1H), 4.23–4.11 (m, 1H), 3.94 (dd, *J* = 9.1, 5.0 Hz, 1H), 3.79–3.71 (m, 5H), 3.71–3.62 (m, 2H), 2.80 (d, *J* = 14.7 Hz, 1H), 2.59 (brs, 1H), 2.44 (d, *J* = 14.7 Hz, 1H), 2.33 (s, 3H), 1.55 (s, 3H), 1.46 (d, *J* = 6.9 Hz, 3H), 1.37 (s, 3H); <sup>13</sup>C NMR (101 MHz, Chloroform-*d*)  $\delta$  168.0, 138.2, 135.5, 133.4, 129.6, 129.3, 128.6, 110.4, 79.4, 76.9, 75.0, 74.2, 72.4, 63.5, 62.2, 52.2, 34.3, 28.2, 25.7, 21.2, 13.0; HRMS (ESI) *m/z* calcd for C<sub>23</sub>H<sub>32</sub>O<sub>7</sub>SNa [M+Na]<sup>+</sup> 475.1761, found 475.1756.

***p*-Tolyl 4-*O*-(2-hydroxyethyl)-4-*C*-[2-(methoxycarbonyl)allyl]-1-thio- $\alpha$ -*L*-talopyranoside (**3k**)**

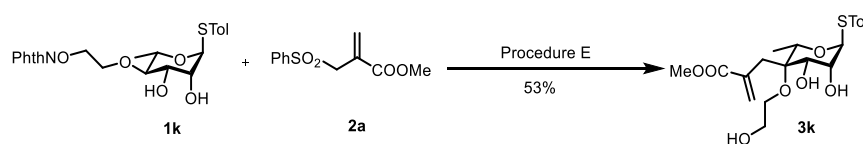

Following the general procedure E, **1k** (91.9 mg, 200.0  $\mu$ mol, 1.0 equiv) and **2a** (152.3 mg, 598.7  $\mu$ mol, 3.0 equiv) were treated with hantzsch ester (76.3 mg, 301.3  $\mu$ mol, 1.5 equiv) and *fac*-Ir(ppy)<sub>3</sub> (1.3 mg, 2.0  $\mu$ mol, 0.01 equiv) in 1,4-dioxane (4.0 mL) to give **3k** (43.6 mg, 105.8  $\mu$ mol, 53%) as a white foam after purification by silica gel column chromatography (PE:EA = 2:1).  $[\alpha]_D^{25} = -69.11$  (*c* 1.3, CHCl<sub>3</sub>); <sup>1</sup>H NMR (400 MHz, Methanol-*d*<sub>4</sub>)  $\delta$  7.34–7.24 (m, 2H), 7.15–6.99 (m, 2H), 6.44 (d, *J* = 3.0 Hz, 1H), 5.73

(d,  $J = 2.4$  Hz, 1H), 5.37 (s, 1H), 4.54 (d,  $J = 3.5$  Hz, 1H), 4.30–4.17 (m, 1H), 3.98 (d,  $J = 2.6$  Hz, 1H), 3.84–3.67 (m, 1H), 3.67–3.55 (m, 1H), 3.54–3.45 (m, 2H), 3.14 (d,  $J = 17.6$  Hz, 1H), 2.73–2.60 (m, 1H), 2.23 (s, 3H), 1.22 (d,  $J = 6.7$  Hz, 3H);  $^{13}\text{C}$  NMR (101 MHz, Methanol- $d_4$ )  $\delta$  165.3, 137.9, 132.3, 132.1, 130.0, 129.8, 129.5, 89.9, 77.1, 75.5, 70.7, 70.1, 67.0, 61.1, 31.8, 19.7, 13.3; HRMS (ESI)  $m/z$  calcd for  $\text{C}_{20}\text{H}_{28}\text{O}_7\text{SNa}$   $[\text{M}+\text{Na}]^+$  477.1448, found 477.1447.

**Dimethylhexylsilyl 2,4,6-tri-*O*-benzoyl-3-*O*-(2-hydroxyethyl)-3-*C*-[2-(methoxycarbonyl)allyl]- $\beta$ -D-allopyranoside (**3I**) and Dimethylhexylsilyl 2,4,6-tri-*O*-benzoyl-3-*O*-(2-hydroxyethyl)-3-*C*-[2-(methoxycarbonyl)allyl]- $\beta$ -D-glucopyranoside (**3I'**)**

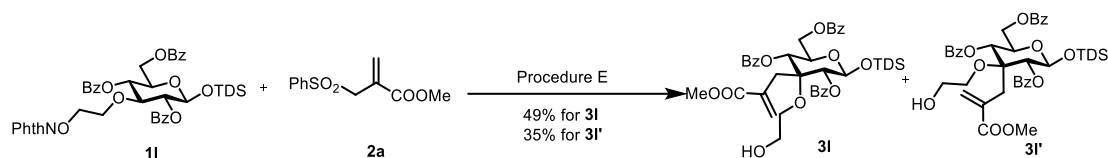

Following the general procedure E, **1I** (82.4 mg, 100.0  $\mu\text{mol}$ , 1.0 equiv) and **2a** (76.3 mg, 300.0  $\mu\text{mol}$ , 3.0 equiv) were treated with hantzsch ester (38.1 mg, 150.1  $\mu\text{mol}$ , 1.5 equiv) and *fac*-Ir(ppy)<sub>3</sub> (0.7 mg, 1.1  $\mu\text{mol}$ , 0.01 equiv) in 1,4-dioxane (2.0 mL) to give **3I** (38.3 mg, 49.3  $\mu\text{mol}$ , 49%) and **3I'** (27.0 mg, 34.8  $\mu\text{mol}$ , 35%) as white foam after purification by silica gel column chromatography (PE:EA = 1.5:1).

For **3I**:  $[\alpha]_{\text{D}}^{25} = -2.70$  ( $c$  1.3,  $\text{CHCl}_3$ );  $^1\text{H}$  NMR (400 MHz, Chloroform- $d$ )  $\delta$  8.01–7.84 (m, 6H), 7.57–7.46 (m, 2H), 7.45–7.33 (m, 5H), 7.33–7.21 (m, 2H), 6.24 (s, 1H), 5.87 (s, 1H), 5.22–5.18 (m, 1H), 5.17–5.10 (m, 2H), 4.43–4.27 (m, 3H), 4.17–4.04 (m, 2H), 3.93–3.80 (m, 2H), 3.39 (s, 3H), 2.93–2.74 (m, 2H), 2.38–2.26 (brs, 1H), 1.39–1.31 (m, 1H), 0.64–0.50 (m, 12H), 0.00 (s, 3H), -0.11 (s, 3H);  $^{13}\text{C}$  NMR (101 MHz, Chloroform- $d$ )  $\delta$  167.5, 166.2, 165.8, 165.1, 134.2, 133.7, 133.3, 133.1, 130.8, 130.2, 129.9, 129.84, 129.82, 129.5, 128.8, 128.6, 128.3, 94.5, 80.2, 74.8, 71.8, 71.1, 66.2, 64.4, 62.8, 52.3, 33.7, 24.7, 19.8, 19.7, 18.5, 18.4, -1.8, -3.3; HRMS (ESI)  $m/z$  calcd for  $\text{C}_{42}\text{H}_{56}\text{NO}_{12}\text{Si}$   $[\text{M}+\text{NH}_4]^+$  794.3566, found 794.3570.

For **3I'**:  $[\alpha]_{\text{D}}^{25} = -2.16$  ( $c$  1.2,  $\text{CHCl}_3$ );  $^1\text{H}$  NMR (400 MHz, Chloroform- $d$ )  $\delta$  7.98–7.92 (m, 6H), 7.56–7.46 (m, 3H), 7.42–7.32 (m, 6H), 6.04–6.01 (m, 1H), 5.69 (s, 1H), 5.57



(d,  $J = 9.3$  Hz, 1H), 5.43 (d,  $J = 7.4$  Hz, 1H), 5.19 (d,  $J = 7.4$  Hz, 1H), 4.51 (dd,  $J = 11.4, 2.7$  Hz, 1H), 4.44–4.29 (m, 2H), 3.77–3.70 (m, 2H), 3.57–3.47 (m, 5H), 3.26–3.06 (m, 2H), 1.99–1.88 (m, 1H), 1.47–1.35 (m, 1H), 0.66–0.61 (m, 12H), 0.08 (s, 3H), 0.00 (s, 3H);  $^{13}\text{C}$  NMR (101 MHz, Chloroform- $d$ )  $\delta$  169.0, 166.2, 165.6, 165.3, 136.3, 133.7, 133.3, 133.2, 130.1, 130.0, 129.9, 129.8, 129.2, 128.6, 128.4, 128.0, 95.0, 79.6, 73.1, 71.3, 69.3, 64.2, 63.4, 62.1, 51.9, 33.9, 24.7, 19.9, 19.8, 18.5, 18.4, -1.8, -3.3; HRMS (ESI)  $m/z$  calcd for  $\text{C}_{42}\text{H}_{56}\text{NO}_{12}\text{Si}$   $[\text{M}+\text{NH}_4]^+$  794.3566, found 794.3578.

***tert*-Butyldimethylsilyl 4,6-di-*O*-benzylidene-2-deoxy-3-*O*-[2-*O*-(4-bromobenzoyl)ethyl]-3-*C*-[2-(methoxycarbonyl)allyl]- $\beta$ -D-allopyranoside ( $3\text{m}^{\text{BrBz}}$ ) and *tert*-Butyldimethylsilyl 4,6-di-*O*-benzylidene-2-deoxy-3-*O*-[2-*O*-(4-bromobenzoyl)ethyl]-3-*C*-[2-(methoxycarbonyl)allyl]- $\beta$ -D-glucopyranoside ( $3\text{m}'^{\text{BrBz}}$ )**

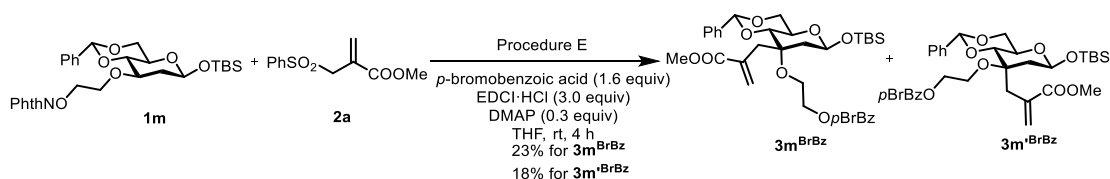

A mixture of **1m** (111.1 mg, 200.0  $\mu\text{mol}$ , 1.0 equiv), **2a** (152.7 mg, 603.6  $\mu\text{mol}$ , 3.0 equiv), hantzsch ester (76.3 mg, 301.3  $\mu\text{mol}$ , 1.5 equiv) and *fac*-Ir(ppy) $_3$  (1.3 mg, 2.0  $\mu\text{mol}$ , 0.01 equiv) were placed in a 10 mL clear-colored glass reaction tube. After 1,4-dioxane (4.0 mL) was added, the reaction was exchanged three times using argon gas and exposed to blue LEDs (450 nm-470 nm) at 35  $^\circ\text{C}$  with stirring for 3 h. The resultant mixture was diluted with DCM and washed with saturated  $\text{NaHCO}_3$  solution and brine. The organic layer was collected, dried over  $\text{Na}_2\text{SO}_4$ , filtered off the solid and concentrated *in vacuo* give the crude product without further purification for next step. The crude product was dissolved in THF (10.0 mL),  $p$ -bromobenzoic acid (63.9 mg, 318.0  $\mu\text{mol}$ , 1.6 equiv), EDCI·HCl (61.0 mg, 318.0  $\mu\text{mol}$ , 1.6 equiv) and DMAP (2.4 mg, 21.0  $\mu\text{mol}$ , 0.1 equiv) were added at temperature under an argon atmosphere. The resultant solution was stirred at room temperature for 8 h. The resultant mixture was diluted with DCM and washed with saturated  $\text{NaHCO}_3$  solution and brine. The organic layer was collected, dried over  $\text{Na}_2\text{SO}_4$ , filtered off the solid and concentrated *in vacuo*.

The resulting residue was purified by silica gel column chromatography (PE:EA = 10:1) to afford **3m**<sup>BrBz</sup> (32.1 mg, 46.5  $\mu$ mol, 23%) and **3m'**<sup>BrBz</sup> (25.1 mg, 36.4  $\mu$ mol, 18%) as white foam.

For **3m**<sup>BrBz</sup>:  $[\alpha]_D^{25} = -7.35$  (*c* 0.2, CHCl<sub>3</sub>); <sup>1</sup>H NMR (400 MHz, Chloroform-*d*)  $\delta$  7.91–7.84 (m, 2H), 7.56–7.47 (m, 2H), 7.45–7.38 (m, 2H), 7.36–7.27 (m, 3H), 6.26 (s, 1H), 5.64 (s, 1H), 5.31 (s, 1H), 5.12 (d, *J* = 7.5 Hz, 1H), 4.46–4.35 (m, 2H), 4.30–4.21 (m, 1H), 4.17 (dd, *J* = 10.4, 5.1 Hz, 1H), 3.99–3.90 (m, 1H), 3.90–3.81 (m, 1H), 3.69–3.59 (m, 4H), 3.53 (d, *J* = 9.4 Hz, 1H), 2.88 (d, *J* = 14.0 Hz, 1H), 2.77 (d, *J* = 14.1 Hz, 1H), 1.97–1.88 (m, 1H), 1.41 (dd, *J* = 13.8, 9.1 Hz, 1H), 0.80 (s, 9H), -0.00 (s, 3H), -0.02 (s, 3H); <sup>13</sup>C NMR (101 MHz, Chloroform-*d*)  $\delta$  167.8, 165.9, 137.7, 135.8, 131.9, 131.3, 129.2, 129.1, 128.5, 128.2, 126.3, 102.4, 93.7, 82.3, 76.4, 69.5, 65.0, 64.1, 62.1, 52.2, 43.6, 33.3, 25.8, 18.2, -4.2, -5.1; HRMS (ESI) *m/z* calcd for C<sub>33</sub>H<sub>47</sub>BrNO<sub>9</sub>Si [M+NH<sub>4</sub>]<sup>+</sup> 708.2198, found 708.2217.

For **3m'**<sup>BrBz</sup>:  $[\alpha]_D^{25} = -6.00$  (*c* 0.5, CHCl<sub>3</sub>); <sup>1</sup>H NMR (400 MHz, Chloroform-*d*)  $\delta$  7.89–7.83 (m, 2H), 7.55–7.49 (m, 2H), 7.48–7.41 (m, 2H), 7.38–7.31 (m, 3H), 6.30 (s, 1H), 5.78 (s, 1H), 5.52 (s, 1H), 5.15–5.03 (m, 1H), 4.45–4.37 (m, 2H), 4.32 (dd, *J* = 10.4, 4.7 Hz, 1H), 3.97–3.84 (m, 3H), 3.79 (t, *J* = 10.1 Hz, 1H), 3.70–3.61 (m, 4H), 3.03 (d, *J* = 15.1 Hz, 1H), 2.82 (d, *J* = 15.1 Hz, 1H), 1.97–1.89 (m, 1H), 1.71 (dd, *J* = 13.2, 9.7 Hz, 1H), 0.89 (s, 9H), 0.15–0.09 (m, 6H); <sup>13</sup>C NMR (101 MHz, Chloroform-*d*)  $\delta$  168.3, 166.0, 137.5, 135.4, 131.8, 131.3, 129.5, 129.2, 128.4, 126.2, 101.6, 94.4, 82.5, 76.4, 69.7, 65.6, 64.8, 60.9, 52.1, 41.5, 30.1, 25.8, -4.2, -5.2; HRMS (ESI) *m/z* calcd for C<sub>33</sub>H<sub>43</sub>BrO<sub>9</sub>SiNa [M+Na]<sup>+</sup> 713.1752, found 713.1757.

**Methyl 2,4,6-tri-*O*-benzoyl-3-*O*-(2-hydroxyethyl)-3-*C*-[2-(methoxycarbonyl)allyl]- $\alpha$ -D-mannopyranoside (**3n**) and Methyl 2,4,6-tri-*O*-benzoyl-3-*O*-(2-hydroxyethyl)-3-*C*-[2-(methoxycarbonyl)allyl]- $\alpha$ -D-altropyranoside (**3n'**)**

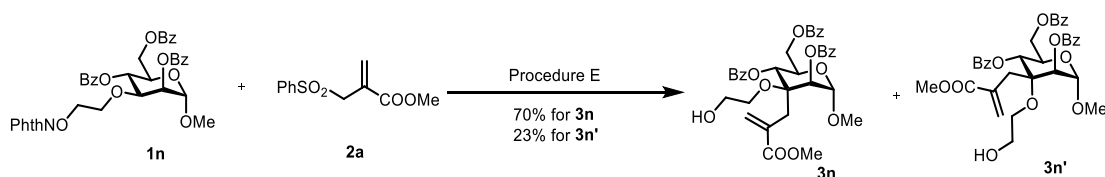

Following the general procedure E, **1n** (487.0 mg, 700.0  $\mu\text{mol}$ , 1.0 equiv) and **2a** (534.2 mg, 2.10 mmol, 3.0 equiv) were treated with hantzsch ester (266.0 mg, 1.05 mmol, 1.5 equiv) and *fac*-Ir(ppy)<sub>3</sub> (4.6 mg, 7.0  $\mu\text{mol}$ , 0.01 equiv) in 1,4-dioxane (4.0 mL) to give **3n** (318.7 mg, 491.7  $\mu\text{mol}$ , 70%) and **3n'** (106.6 mg, 164.5  $\mu\text{mol}$ , 23%) as white foam after purification by silica gel column chromatography (PE:EA = 1:1).

For **3n**:  $[\alpha]_{\text{D}}^{25} = -11.13$  (*c* 0.7, CHCl<sub>3</sub>); <sup>1</sup>H NMR (400 MHz, Chloroform-*d*)  $\delta$  8.11–8.04 (m, 6H), 7.61–7.53 (m, 3H), 7.49–7.38 (m, 6H), 6.30 (s, 1H), 5.98 (d, *J* = 9.1 Hz, 1H), 5.91 (s, 1H), 5.59 (d, *J* = 2.0 Hz, 1H), 4.88 (d, *J* = 1.9 Hz, 1H), 4.62 (dd, *J* = 12.0, 3.3 Hz, 1H), 4.54 (dd, *J* = 12.0, 5.3 Hz, 1H), 4.40–4.31 (m, 1H), 3.78–3.71 (m, 1H), 3.68 (s, 3H), 3.61–3.55 (m, 1H), 3.55–3.52 (m, 1H), 3.47 (s, 3H), 3.36–3.30 (m, 2H), 3.25 (d, *J* = 14.5 Hz, 1H), 2.26 (brs, 1H); <sup>13</sup>C NMR (101 MHz, Chloroform-*d*)  $\delta$  169.2, 166.3, 165.6, 165.5, 136.2, 133.8, 133.7, 133.2, 130.0, 129.9, 129.8, 129.4, 129.3, 128.8, 128.5, 99.6, 77.9, 73.4, 69.2, 68.9, 65.8, 63.5, 62.1, 55.9, 52.2, 30.7; HRMS (ESI) *m/z* calcd for C<sub>35</sub>H<sub>36</sub>O<sub>12</sub>Na [M+Na]<sup>+</sup> 671.2099, found 671.2095.

For **3n'**:  $[\alpha]_{\text{D}}^{25} = -23.6$  (*c* 1.0, CHCl<sub>3</sub>); <sup>1</sup>H NMR (400 MHz, Chloroform-*d*)  $\delta$  8.15–7.98 (m, 6H), 7.67–7.59 (m, 2H), 7.56 (t, *J* = 7.4 Hz, 1H), 7.52–7.44 (m, 4H), 7.44–7.38 (m, 2H), 6.09 (s, 1H), 6.02 (d, *J* = 10.3 Hz, 1H), 5.36 (s, 1H), 5.07 (s, 1H), 4.84 (s, 1H), 4.73–4.67 (m, 1H), 4.65–4.59 (m, 1H), 4.47–4.40 (m, 1H), 4.16 (t, *J* = 8.1 Hz, 1H), 4.05 (d, *J* = 8.4 Hz, 1H), 3.74 (d, *J* = 10.5 Hz, 1H), 3.70–3.63 (m, 1H), 3.56 (s, 3H), 3.49 (s, 3H), 3.15 (d, *J* = 14.8 Hz, 1H), 2.60 (d, *J* = 14.8 Hz, 1H), 1.68 (s, 1H); <sup>13</sup>C NMR (101 MHz, Chloroform-*d*)  $\delta$  167.9, 166.2, 165.6, 164.9, 134.9, 134.0, 133.9, 133.2, 130.0, 129.9, 129.2, 129.0, 128.9, 128.5, 100.1, 78.5, 72.1, 71.8, 66.0, 65.9, 63.3, 62.1, 56.6, 52.1, 31.5; HRMS (ESI) *m/z* calcd for C<sub>35</sub>H<sub>40</sub>NO<sub>12</sub> [M+NH<sub>4</sub>]<sup>+</sup> 666.2545, found 666.2553.

***tert*-Butyldimethylsilyl 2,4,6-tri-*O*-benzoyl-3-*O*-(2-hydroxyethyl)-3-*C*-[2-(methoxycarbonyl)allyl]- $\beta$ -*D*-galactopyranoside (**3o**)**

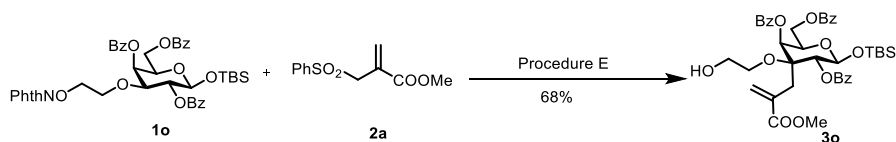

Following the general procedure E, **1o** (159.2 mg, 200.2  $\mu\text{mol}$ , 1.0 equiv) and **2a** (152.7 mg, 603.6  $\mu\text{mol}$ , 3.0 equiv) were treated with hantzsch ester (76.3 mg, 301.3  $\mu\text{mol}$ , 1.5 equiv) and *fac*-Ir(ppy)<sub>3</sub> (1.3 mg, 2.0  $\mu\text{mol}$ , 0.01 equiv) in 1,4-dioxane (4.0 mL) to give **3o** (102.2 mg, 136.6  $\mu\text{mol}$ , 68%) as a white foam after purification by silica gel column chromatography (PE:EA = 4:1).  $[\alpha]_{\text{D}}^{25} = +76.37$  (*c* 0.6, CHCl<sub>3</sub>); <sup>1</sup>H NMR (400 MHz, Chloroform-*d*)  $\delta$  8.09–8.01 (m, 2H), 7.98–7.93 (m, 4H), 7.53–7.43 (m, 3H), 7.42–7.31 (m, 6H), 6.34 (s, 1H), 5.83 (s, 1H), 5.62 (d, *J* = 7.5 Hz, 1H), 5.55 (s, 1H), 4.97 (d, *J* = 7.5 Hz, 1H), 4.49–4.40 (m, 2H), 4.27–4.16 (m, 1H), 3.54 (s, 3H), 3.53–3.49 (m, 1H), 3.38–3.33 (m, 1H), 3.29 (d, *J* = 15.2 Hz, 1H), 3.24–3.13 (m, 2H), 2.88 (d, *J* = 15.2 Hz, 1H), 1.86 (s, 1H), 0.66 (s, 9H), 0.00 (s, 3H), -0.11 (s, 3H); <sup>13</sup>C NMR (101 MHz, Chloroform-*d*)  $\delta$  168.4, 166.2, 166.1, 164.9, 134.4, 133.6, 133.5, 133.2, 130.5, 130.0, 129.9, 129.8, 129.7, 129.3, 128.8, 128.6, 128.4, 95.8, 78.7, 74.6, 71.5, 70.6, 65.0, 62.7, 62.0, 52.3, 30.5, 25.4, 17.8, -4.1, -5.1; HRMS (ESI) *m/z* calcd for C<sub>40</sub>H<sub>52</sub>NO<sub>12</sub>Si [M+NH<sub>4</sub>]<sup>+</sup> 766.3253, found 766.3265.

**Methyl 6-*O*-*tert*-butyldiphenylsilyl-2-*O*-(2-hydroxyethyl)-3,4-*O*-isopropylidene-2-*C*-[2-(methoxycarbonyl)allyl]- $\alpha$ -D-talopyranoside (**3p**)**

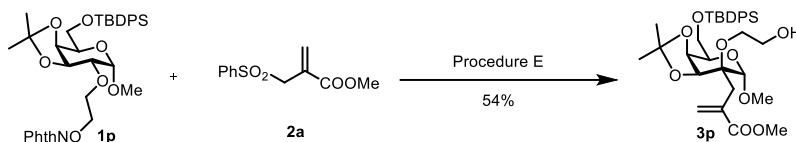

Following the general procedure E, **1p** (132.4 mg, 200.0  $\mu\text{mol}$ , 1.0 equiv) and **2a** (152.7 mg, 603.6  $\mu\text{mol}$ , 3.0 equiv) were treated with hantzsch ester (76.3 mg, 301.3  $\mu\text{mol}$ , 1.5 equiv) and *fac*-Ir(ppy)<sub>3</sub> (1.3 mg, 2.0  $\mu\text{mol}$ , 0.01 equiv) in 1,4-dioxane (4.0 mL) to give **3p** (66.7 mg, 108.6  $\mu\text{mol}$ , 54%) as a white foam after purification by silica gel column chromatography (PE:EA = 1:1).  $[\alpha]_{\text{D}}^{25} = +33.54$  (*c* 0.4, CHCl<sub>3</sub>); <sup>1</sup>H NMR (400 MHz, Chloroform-*d*)  $\delta$  7.73–7.67 (m, 4H), 7.44–7.33 (m, 6H), 6.17 (d, *J* = 1.1 Hz, 1H), 5.65 (s, 1H), 4.73 (s, 1H), 4.27 (d, *J* = 5.9 Hz, 1H), 4.21 (dd, *J* = 5.9, 3.3 Hz, 1H), 4.01 (dd, *J* = 9.1, 6.2 Hz, 1H), 3.98–3.93 (m, 1H), 3.89 (dd, *J* = 9.1, 5.8 Hz, 1H), 3.76 (s, 3H), 3.71–3.56 (m, 4H), 3.22 (s, 3H), 2.88 (d, *J* = 14.0 Hz, 1H), 2.59 (d, *J* = 14.0 Hz, 1H), 1.49 (s, 3H), 1.30 (s, 3H), 1.05 (s, 9H); <sup>13</sup>C NMR (101 MHz, Chloroform-*d*)  $\delta$  168.1,

137.1, 135.7, 133.6, 129.7, 127.74, 127.69, 127.2, 109.2, 99.8, 74.5, 73.2, 71.7, 68.3, 63.1, 63.0, 61.7, 55.2, 52.0, 33.5, 26.9, 26.3, 25.6, 19.3; HRMS (ESI)  $m/z$  calcd for  $C_{33}H_{46}O_9SiNa$   $[M+Na]^+$  637.2803, found 637.2800.

**Methyl 2,3,6-tri-*O*-benzoyl-4-*O*-(2-hydroxyethyl)-4-*C*-{2-[(pent-4-yn-1-yloxy)-carbonyl]allyl}- $\alpha$ -D-talopyranoside (4a)**

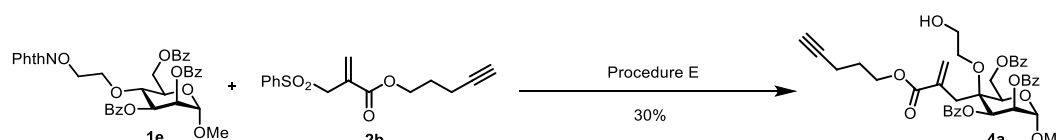

Following the general procedure E, **1e** (139.2 mg, 200.0  $\mu$ mol, 1.0 equiv) and **2b**<sup>[16]</sup> (175.4 mg, 600.0  $\mu$ mol, 3.0 equiv) were treated with hantzsch ester (76.3 mg, 301.3  $\mu$ mol, 1.5 equiv) and *fac*-Ir(ppy)<sub>3</sub> (1.3 mg, 2.0  $\mu$ mol, 0.01 equiv) in 1,4-dioxane (4.0 mL) to give **4a** (42.1 mg, 60.1  $\mu$ mol, 30%) as a white foam after purification by silica gel column chromatography (PE:EA = 3:1).  $[\alpha]_D^{25} = +17.96$  (*c* 0.3, CHCl<sub>3</sub>); <sup>1</sup>H NMR (400 MHz, Chloroform-*d*)  $\delta$  8.11–8.05 (m, 2H), 8.01–7.93 (m, 4H), 7.61–7.51 (m, 3H), 7.48–7.36 (m, 6H), 6.37 (s, 1H), 5.80 (s, 1H), 5.64 (d, *J* = 3.4 Hz, 1H), 5.58–5.53 (m, 1H), 4.96 (d, *J* = 2.3 Hz, 1H), 4.93–4.88 (m, 2H), 4.26 (t, *J* = 5.2 Hz, 1H), 4.23–4.08 (m, 2H), 3.99–3.93 (m, 1H), 3.93–3.85 (m, 1H), 3.77–3.69 (m, 1H), 3.68–3.59 (m, 1H), 3.44 (s, 3H), 3.21 (d, *J* = 15.1 Hz, 1H), 2.85 (d, *J* = 14.3 Hz, 1H), 2.27–2.21 (m, 2H), 2.03 (s, 1H), 1.93 (t, *J* = 2.6 Hz, 1H), 1.87–1.78 (m, 2H); <sup>13</sup>C NMR (101 MHz, Chloroform-*d*)  $\delta$  167.0, 166.8, 165.9, 165.6, 135.2, 133.5, 133.3, 130.7, 130.1, 130.0, 129.8, 129.7, 129.5, 128.8, 128.6, 128.5, 98.6, 83.1, 77.4, 72.4, 70.1, 69.2, 69.1, 66.1, 64.1, 63.8, 62.4, 55.6, 32.4, 27.5, 15.3; HRMS (ESI)  $m/z$  calcd for  $C_{39}H_{44}NO_{12}$   $[M+NH_4]^+$  718.2858, found 718.2876.

**Methyl 2,3,6-tri-*O*-benzoyl-4-*C*-[2-(benzyloxycarbonyl)allyl]-4-*O*-(2-hydroxyethyl)- $\alpha$ -D-talopyranoside (4b)**

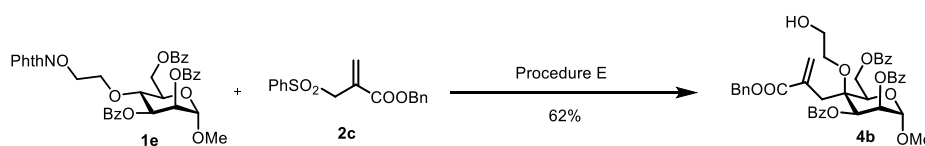

Following the general procedure E, **1e** (139.2 mg, 200.0  $\mu\text{mol}$ , 1.0 equiv) and **2c**<sup>[16]</sup> (189.8 mg, 600.0  $\mu\text{mol}$ , 3.0 equiv) were treated with hantzsch ester (76.3 mg, 301.3  $\mu\text{mol}$ , 1.5 equiv) and *fac*-Ir(ppy)<sub>3</sub> (1.3 mg, 2.0  $\mu\text{mol}$ , 0.01 equiv) in 1,4-dioxane (4.0 mL) to give **4b** (90.1 mg, 124.4  $\mu\text{mol}$ , 62%) as a white foam after purification by silica gel column chromatography (PE:EA = 3:1).  $[\alpha]_{\text{D}}^{25} = +18.66$  (*c* 3.6, CHCl<sub>3</sub>); <sup>1</sup>H NMR (400 MHz, Chloroform-*d*)  $\delta$  8.11–8.05 (m, 2H), 8.04–7.94 (m, 4H), 7.61–7.52 (m, 3H), 7.47–7.38 (m, 6H), 7.34–7.28 (m, 5H), 6.43 (s, 1H), 5.83 (s, 1H), 5.68 (d, *J* = 3.8 Hz, 1H), 5.58 (t, *J* = 3.3 Hz, 1H), 5.14 (d, *J* = 12.4 Hz, 1H), 5.08 (d, *J* = 12.4 Hz, 1H), 4.97 (d, *J* = 2.9 Hz, 1H), 4.95–4.90 (m, 2H), 4.28 (t, *J* = 5.3 Hz, 1H), 4.01–3.86 (m, 2H), 3.75–3.60 (m, 2H), 3.40 (s, 3H), 3.24 (d, *J* = 14.4 Hz, 1H), 2.89 (d, *J* = 14.4 Hz, 1H), 2.19 (s, 1H); <sup>13</sup>C NMR (101 MHz, Chloroform-*d*)  $\delta$  166.9, 166.7, 165.8, 165.6, 135.7, 135.1, 133.5, 133.2, 130.9, 130.1, 130.0, 129.8, 129.7, 129.5, 128.7, 128.6, 128.5, 128.3, 98.5, 77.4, 72.4, 70.2, 69.1, 67.1, 66.1, 63.7, 62.4, 55.5, 32.4; HRMS (ESI) *m/z* calcd for C<sub>41</sub>H<sub>44</sub>NO<sub>12</sub> [M+NH<sub>4</sub>]<sup>+</sup> 742.2858, found 742.2878.

**Methyl 2,3,6-tri-*O*-benzoyl-4-*O*-(2-hydroxyethyl)-4-*C*-[2-(cyano)allyl]- $\alpha$ -D-talopyranoside (**4c**)**

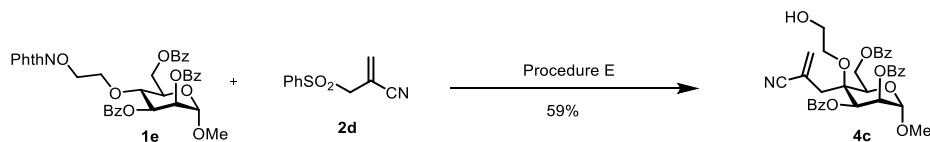

Following the general procedure E, **1e** (139.2 mg, 200.0  $\mu\text{mol}$ , 1.0 equiv) and **2d**<sup>[16]</sup> (124.4 mg, 600.0  $\mu\text{mol}$ , 3.0 equiv) were treated with hantzsch ester (76.3 mg, 301.3  $\mu\text{mol}$ , 1.5 equiv) and *fac*-Ir(ppy)<sub>3</sub> (1.3 mg, 2.0  $\mu\text{mol}$ , 0.01 equiv) in 1,4-dioxane (4.0 mL) to give **5c** (72.4 mg, 117.7  $\mu\text{mol}$ , 59%) as a white foam after purification by silica gel column chromatography (PE:EA = 1.5:1).  $[\alpha]_{\text{D}}^{25} = +55.28$  (*c* 2.8, CHCl<sub>3</sub>); <sup>1</sup>H NMR (400 MHz, Chloroform-*d*)  $\delta$  8.13–8.07 (m, 2H), 8.00–7.91 (m, 4H), 7.61–7.51 (m, 3H), 7.49–7.42 (m, 4H), 7.41–7.35 (m, 2H), 6.09 (s, 1H), 5.94 (s, 1H), 5.77 (d, *J* = 3.8 Hz, 1H), 5.49 (t, *J* = 3.6 Hz, 1H), 5.17–5.09 (m, 1H), 5.06 (d, *J* = 3.6 Hz, 1H), 4.82 (dd, *J* = 12.3, 2.3 Hz, 1H), 4.48 (dd, *J* = 8.7, 2.2 Hz, 1H), 3.99–3.83 (m, 2H), 3.77–3.61 (m, 2H), 3.45 (s, 3H), 3.08 (d, *J* = 14.6 Hz, 1H), 2.73 (d, *J* = 14.6 Hz, 1H), 2.52 (s, 1H); <sup>13</sup>C

NMR (101 MHz, Chloroform-*d*)  $\delta$  166.9, 165.7, 165.5, 137.2, 133.8, 133.6, 133.4, 129.92, 129.89, 129.85, 129.8, 129.3, 129.0, 128.9, 128.6, 128.5, 118.8, 116.7, 98.1, 76.8, 72.6, 69.9, 69.0, 66.3, 62.5, 62.1, 56.0, 36.9; HRMS (ESI)  $m/z$  calcd for  $C_{34}H_{37}N_2O_{10}$   $[M+NH_4]^+$  633.2443, found 633.2456.

**Methyl 2,3,6-tri-*O*-benzoyl-4-*O*-(2-hydroxyethyl)-4-*C*-[2-(phenylsulfonyl)allyl]- $\alpha$ -*D*-talopyranoside (4d)**

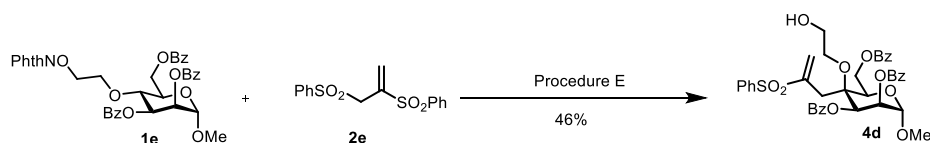

Following the general procedure E, **1e** (139.2 mg, 200.0  $\mu$ mol, 1.0 equiv) and **2e**<sup>[16]</sup> (193.4 mg, 600.0  $\mu$ mol, 3.0 equiv) were treated with hantzsch ester (76.3 mg, 301.3  $\mu$ mol, 1.5 equiv) and *fac*-Ir(ppy)<sub>3</sub> (1.3 mg, 2.0  $\mu$ mol, 0.01 equiv) in 1,4-dioxane (4.0 mL) to give **4d** (67.5 mg, 92.4  $\mu$ mol, 46%) as a white foam after purification by silica gel column chromatography (PE:EA = 2:1).  $[\alpha]_D^{25} = +54.88$  (*c* 3.2, CHCl<sub>3</sub>); <sup>1</sup>H NMR (400 MHz, Chloroform-*d*)  $\delta$  8.11–8.05 (m, 2H), 7.98–7.93 (m, 2H), 7.93–7.86 (m, 4H), 7.62–7.54 (m, 3H), 7.54–7.43 (m, 7H), 7.39–7.30 (m, 2H), 6.63 (s, 1H), 6.30 (s, 1H), 5.87 (d, *J* = 2.4 Hz, 1H), 5.34 (s, 1H), 5.16 (s, 1H), 5.05 (d, *J* = 4.7 Hz, 1H), 4.72 (dd, *J* = 12.2, 2.4 Hz, 1H), 4.42 (d, *J* = 6.9 Hz, 1H), 3.72–3.53 (m, 4H), 3.41 (s, 3H), 3.07 (d, *J* = 16.9 Hz, 1H), 2.79 (d, *J* = 16.9 Hz, 1H), 2.35 (s, 1H); <sup>13</sup>C NMR (101 MHz, Chloroform-*d*)  $\delta$  166.9, 165.7, 165.5, 145.0, 138.0, 135.0, 133.9, 133.7, 133.5, 133.3, 130.0, 129.9, 129.78, 129.75, 129.5, 129.3, 129.1, 128.8, 128.6, 128.5, 97.2, 77.3, 73.4, 70.5, 69.2, 65.3, 62.4, 61.9, 56.0, 55.2, 30.0; HRMS (ESI)  $m/z$  calcd for  $C_{39}H_{38}O_{12}NaS$   $[M+Na]^+$  753.1976, found 753.1982.

**Methyl 2,3,6-tri-*O*-benzoyl-4-*O*-(2-hydroxyethyl)-4-*C*-[2-(phenyl)allyl]- $\alpha$ -*D*-talopyranoside (4e)**

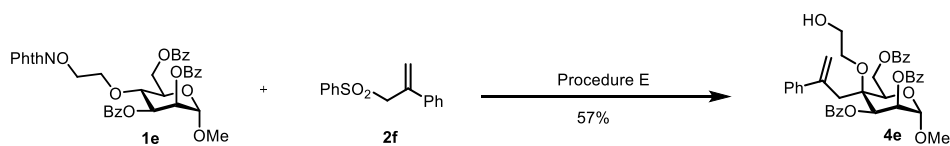

Following the general procedure E, **1e** (139.2 mg, 200.0  $\mu\text{mol}$ , 1.0 equiv) and **2f**<sup>16f</sup> (163.4 mg, 600.0  $\mu\text{mol}$ , 3.0 equiv) were treated with hantzsch ester (76.3 mg, 301.3  $\mu\text{mol}$ , 1.5 equiv) and *fac*-Ir(ppy)<sub>3</sub> (1.3 mg, 2.0  $\mu\text{mol}$ , 0.01 equiv) in 1,4-dioxane (4.0 mL) to give **4e** (75.5 mg, 113.3  $\mu\text{mol}$ , 57%) as a white foam after purification by silica gel column chromatography (PE:EA = 1:1).  $[\alpha]_{\text{D}}^{25} = +43.26$  (*c* 2.6, CHCl<sub>3</sub>); <sup>1</sup>H NMR (400 MHz, Chloroform-*d*)  $\delta$  8.02–7.98 (m, 2H), 7.96–7.92 (m, 2H), 7.92–7.88 (m, 2H), 7.59–7.51 (m, 3H), 7.46–7.37 (m, 6H), 7.35–7.30 (m, 2H), 7.21–7.14 (m, 2H), 7.04 (t, *J* = 7.4 Hz, 1H), 5.65 (d, *J* = 3.7 Hz, 1H), 5.61 (d, *J* = 1.5 Hz, 1H), 5.31–5.27 (m, 1H), 5.15 (s, 1H), 4.85 (d, *J* = 1.6 Hz, 1H), 4.63–4.53 (m, 2H), 4.04–3.91 (m, 3H), 3.78–3.69 (m, 1H), 3.66–3.58 (m, 1H), 3.42 (d, *J* = 14.0 Hz, 1H), 3.34 (s, 3H), 2.86 (d, *J* = 13.9 Hz, 1H), 2.29 (s, 1H); <sup>13</sup>C NMR (101 MHz, Chloroform-*d*)  $\delta$  166.5, 166.0, 165.2, 144.0, 142.1, 133.5, 133.1, 130.1, 130.0, 129.8, 129.7, 129.6, 128.8, 128.7, 128.5, 128.4, 127.9, 126.8, 120.6, 98.6, 78.0, 71.7, 70.2, 69.0, 66.1, 64.0, 62.5, 54.9, 36.8; HRMS (ESI) *m/z* calcd for C<sub>39</sub>H<sub>42</sub>NO<sub>10</sub> [M+NH<sub>4</sub>]<sup>+</sup> 684.2803, found 684.2814.

**Methyl 2,3,6-tri-*O*-benzoyl-4-*O*-(2-hydroxyethyl)-4-*C*-[2-(methoxycarbonyl)ethyl]- $\alpha$ -D-talopyranoside (**6a**)**

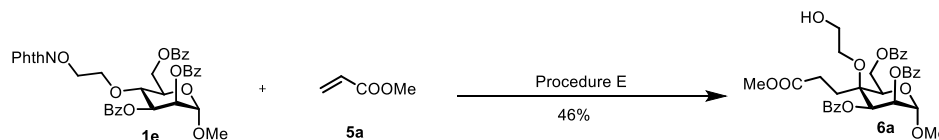

Following the general procedure E, **1e** (139.2 mg, 200.0  $\mu\text{mol}$ , 1.0 equiv) and **5a** (54  $\mu\text{L}$ , 600.0  $\mu\text{mol}$ , 3.0 equiv) were treated with hantzsch ester (76.3 mg, 301.3  $\mu\text{mol}$ , 1.5 equiv) and *fac*-Ir(ppy)<sub>3</sub> (1.3 mg, 2.0  $\mu\text{mol}$ , 0.01 equiv) in 1,4-dioxane (4.0 mL) to give **6a** (58.6 mg, 92.1  $\mu\text{mol}$ , 46%) as a white foam after purification by silica gel column chromatography (PE:EA = 2:1).  $[\alpha]_{\text{D}}^{25} = +5.24$  (*c* 2.7, CHCl<sub>3</sub>); <sup>1</sup>H NMR (400 MHz, Chloroform-*d*)  $\delta$  8.09–8.06 (m, 2H), 8.05–8.00 (m, 2H), 7.97–7.92 (m, 2H), 7.61–7.52 (m, 3H), 7.48–7.38 (m, 6H), 5.77 (d, *J* = 3.6 Hz, 1H), 5.46 (t, *J* = 3.2 Hz, 1H), 5.02 (d, *J* = 2.9 Hz, 1H), 4.90 (s, 1H), 4.78 (dd, *J* = 12.0, 2.6 Hz, 1H), 4.31 (dd, *J* = 8.5, 2.7 Hz, 1H), 3.83–3.65 (m, 4H), 3.63 (s, 3H), 3.41 (s, 3H), 2.69–2.53 (m, 2H), 2.50–2.39 (m, 1H), 2.30 (s, 1H), 2.10–2.01 (m, 1H); <sup>13</sup>C NMR (101 MHz, Chloroform-*d*)  $\delta$  172.8,



166.8, 165.9, 165.7, 133.7, 133.5, 133.4, 130.0, 129.9, 129.7, 129.5, 129.2, 128.8, 128.6, 128.5, 98.4, 76.3, 72.3, 69.7, 69.4, 65.3, 62.7, 62.4, 55.7, 52.0, 28.4, 26.1; HRMS (ESI)  $m/z$  calcd for  $C_{34}H_{40}NO_{12}$   $[M+NH_4]^+$  654.2545, found 654.2551.

**Methyl 2,3,6-tri-*O*-benzoyl-4-*C*-[2-(benzyloxycarbonyl)ethyl]-4-*O*-(2-hydroxyethyl)- $\alpha$ -D-talopyranoside (**6b**)**

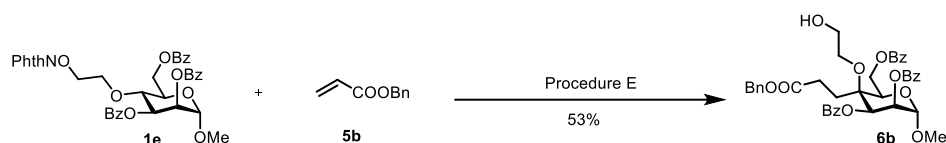

Following the general procedure E, **1e** (139.2 mg, 200.0  $\mu$ mol, 1.0 equiv) and **5b** (92  $\mu$ L, 600.0  $\mu$ mol, 3.0 equiv) were treated with hantzsch ester (76.3 mg, 301.3  $\mu$ mol, 1.5 equiv) and *fac*-Ir(ppy)<sub>3</sub> (1.3 mg, 2.0  $\mu$ mol, 0.01 equiv) in 1,4-dioxane (4.0 mL) to give **6b** (75.2 mg, 103.8  $\mu$ mol, 52%) as a white foam after purification by silica gel column chromatography (PE:EA =2:1).  $[\alpha]_D^{25} = -4.91$  ( $c$  2.8,  $CHCl_3$ );  $^1H$  NMR (400 MHz, Chloroform-*d*)  $\delta$  8.10–8.05 (m, 2H), 8.05–8.01 (m, 2H), 7.96–7.92 (m, 2H), 7.61–7.53 (m, 3H), 7.48–7.38 (m, 6H), 7.34–7.28 (m, 5H), 5.78 (d,  $J = 3.7$  Hz, 1H), 5.46 (t,  $J = 3.4$  Hz, 1H), 5.08 (s, 2H), 5.01 (d,  $J = 2.9$  Hz, 1H), 4.94–4.84 (m, 1H), 4.77 (dd,  $J = 12.1, 2.7$  Hz, 1H), 4.31 (dd,  $J = 8.5, 2.8$  Hz, 1H), 3.86–3.60 (m, 4H), 3.40 (s, 3H), 2.74–2.56 (m, 2H), 2.54–2.42 (m, 1H), 2.15–2.00 (m, 2H);  $^{13}C$  NMR (101 MHz, Chloroform-*d*)  $\delta$  172.2, 166.7, 165.8, 165.6, 135.6, 133.3, 129.7, 128.3, 98.4, 77.1, 69.6, 69.4, 66.8, 65.2, 62.6, 62.3, 55.7, 28.5, 25.9; HRMS (ESI)  $m/z$  calcd for  $C_{40}H_{44}NO_{12}$   $[M+NH_4]^+$  730.2858, found 730.2875.

**Methyl 2,3,6-tri-*O*-benzoyl-4-*C*-(2-cyanoethyl)-4-*O*-(2-hydroxyethyl)- $\alpha$ -D-talopyranoside (**6c**)**

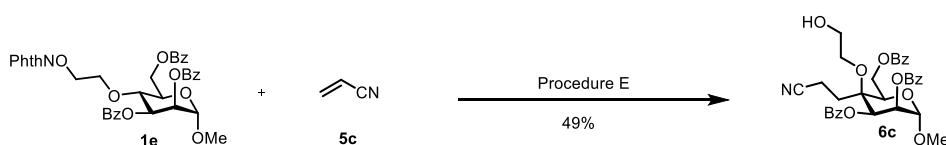

Following the general procedure E, **1e** (139.2 mg, 200.0  $\mu$ mol, 1.0 equiv) and **5c** (40  $\mu$ L, 600.0  $\mu$ mol, 3.0 equiv) were treated with hantzsch ester (76.3 mg, 301.3  $\mu$ mol, 1.5

equiv) and *fac*-Ir(ppy)<sub>3</sub> (1.3 mg, 2.0 μmol, 0.01 equiv) in 1,4-dioxane (4.0 mL) to give **6c** (59.1 mg, 98.0 μmol, 49%) as a white foam after purification by silica gel column chromatography (PE:EA =2:1).  $[\alpha]_{\text{D}}^{25} = +17.57$  (*c* 2.9, CHCl<sub>3</sub>); <sup>1</sup>H NMR (400 MHz, Chloroform-*d*) δ 8.11–8.06 (m, 2H), 8.03–7.99 (m, 2H), 7.99–7.92 (m, 2H), 7.63–7.54 (m, 3H), 7.50–7.39 (m, 6H), 5.76 (d, *J* = 3.6 Hz, 1H), 5.41 (t, *J* = 3.2 Hz, 1H), 5.04 (d, *J* = 3.3 Hz, 1H), 4.93 (d, *J* = 9.1 Hz, 1H), 4.79 (dd, *J* = 12.2, 2.6 Hz, 1H), 4.27 (dd, *J* = 8.4, 2.6 Hz, 1H), 3.82–3.60 (m, 4H), 3.39 (s, 3H), 2.85–2.72 (m, 1H), 2.70–2.59 (m, 1H), 2.50–2.42 (m, 1H), 2.26–2.10 (m, 1H); <sup>13</sup>C NMR (101 MHz, Chloroform-*d*) δ 166.9, 165.7, 133.9, 133.6, 133.5, 129.9, 129.7, 129.6, 129.3, 128.8, 128.71, 128.65, 128.5, 118.9, 98.2, 75.9, 72.1, 69.3, 65.5, 62.1, 55.8, 27.4, 12.1; HRMS (ESI) *m/z* calcd for C<sub>33</sub>H<sub>33</sub>NO<sub>10</sub>Na [M+Na]<sup>+</sup> 626.1997, found 626.1999.

**Methyl [methyl 2,3,4-tri-*O*-benzoyl-7,8-di-deoxy-6-*O*-(2-hydroxyethyl)-8-methylene-*D*-glycero- $\alpha$ -*D*-nonglucopyranosyluronate] (**D-8a**) and Methyl [methyl 2,3,4-tri-*O*-benzoyl-7,8-di-deoxy-6-*O*-(2-hydroxyethyl)-8-methylene-*L*-glycero- $\alpha$ -*D*-nonglucopyranosyluronate] (**L-8a**)**

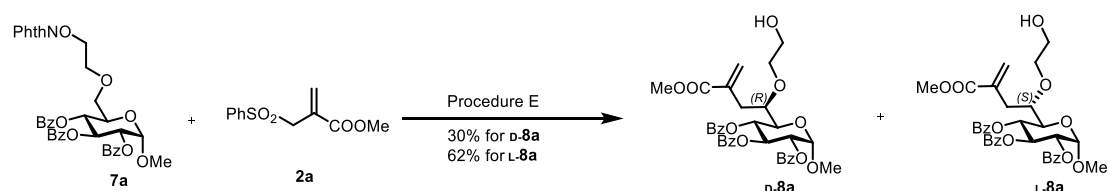

Following the general procedure E, **7a** (118.3 mg, 170.0 μmol, 1.0 equiv) and **2a** (129.9 mg, 510.6 μmol, 3.0 equiv) were treated with hantzsch ester (64.7 mg, 255.5 μmol, 1.5 equiv) and *fac*-Ir(ppy)<sub>3</sub> (1.1mg, 1.7 μmol, 0.01 equiv) in 1,4-dioxane (3.4 mL) to give **D-8a** (33.0 mg, 50.9 μmol, 30%) and **L-8a** (68.5 mg, 105.7 μmol, 62%) as white foam after purification by silica gel column chromatography (PE:EA = 1.5:1).

For **D-8a**:  $[\alpha]_{\text{D}}^{25} = +20.40$  (*c* 0.2, CHCl<sub>3</sub>); <sup>1</sup>H NMR (400 MHz, Chloroform-*d*) δ <sup>1</sup>H NMR (400 MHz, Chloroform-*d*) δ 8.01–7.94 (m, 4H), 7.88–7.84 (m, 2H), 7.61–7.49 (m, 2H), 7.44–7.34 (m, 5H), 7.32–7.27 (m, 2H), 6.20 (d, *J* = 1.5 Hz, 1H), 6.15–6.07 (m, 1H), 5.72 (t, *J* = 9.9 Hz, 1H), 5.59 (d, *J* = 1.5 Hz, 1H), 5.26–5.20 (m, 2H), 4.32 (dd, *J* = 10.2, 1.7 Hz, 1H), 3.83–3.74 (m, 2H), 3.70–3.62 (m, 6H), 3.55–3.48 (m, 1H), 3.46 (s, 3H),

2.67 (d,  $J = 6.8$  Hz, 2H), 2.30 (s, 1H);  $^{13}\text{C}$  NMR (101 MHz, Chloroform- $d$ )  $\delta$  167.6, 165.9, 165.3, 137.3, 134.4, 133.6, 133.5, 133.2, 130.0, 129.9, 129.8, 129.6, 129.3, 129.2, 129.1, 128.6, 128.5, 128.4, 128.3, 127.9, 97.1, 78.4, 72.24, 72.21, 71.0, 69.9, 69.6, 62.1, 55.8, 52.0, 34.1; HRMS (ESI)  $m/z$  calcd for  $\text{C}_{35}\text{H}_{40}\text{NO}_{12}$   $[\text{M}+\text{NH}_4]^+$  666.2545, found 666.2541.

For **L-8a**:  $[\alpha]_{\text{D}}^{25} = +38.06$  ( $c$  2.6,  $\text{CHCl}_3$ );  $^1\text{H}$  NMR (400 MHz, Chloroform- $d$ )  $\delta$  8.00–7.91 (m, 4H), 7.89–7.83 (m, 2H), 7.55–7.47 (m, 2H), 7.43–7.33 (m, 5H), 7.32–7.27 (m, 2H), 6.29 (s, 1H), 6.10 (t,  $J = 9.9$  Hz, 1H), 5.85 (t,  $J = 9.8$  Hz, 1H), 5.74 (s, 1H), 5.34–5.22 (m, 2H), 4.12 (d,  $J = 10.0$  Hz, 1H), 3.82–3.69 (m, 4H), 3.65 (s, 3H), 3.53–3.46 (m, 4H), 2.93 (dd,  $J = 14.0, 6.2$  Hz, 1H), 2.73 (dd,  $J = 14.0, 7.1$  Hz, 1H);  $^{13}\text{C}$  NMR (101 MHz, Chloroform- $d$ )  $\delta$  167.1, 165.9, 165.8, 165.7, 136.9, 133.6, 133.4, 133.1, 129.94, 129.87, 129.7, 129.2, 129.1, 129.0, 128.5, 128.4, 128.3, 97.6, 75.0, 72.5, 72.0, 70.7, 69.6, 69.0, 62.1, 56.4, 52.0, 33.3; HRMS (ESI)  $m/z$  calcd for  $\text{C}_{35}\text{H}_{40}\text{NO}_{12}$   $[\text{M}+\text{NH}_4]^+$  666.2545, found 666.2545.

**Methyl [methyl 2,3,4-tri-*O*-benzoyl-7,8-di-deoxy-6-*O*-(2-hydroxyethyl)-8-methylene-*D*-glycero- $\alpha$ -*D*-nonmannopyranosyluronate] (**D-8b**) and Methyl [methyl 2,3,4-tri-*O*-benzoyl-7,8-di-deoxy-6-*O*-(2-hydroxyethyl)-8-methylene-*L*-glycero- $\alpha$ -*D*-nonmannopyranosyluronate] (**L-8b**)**

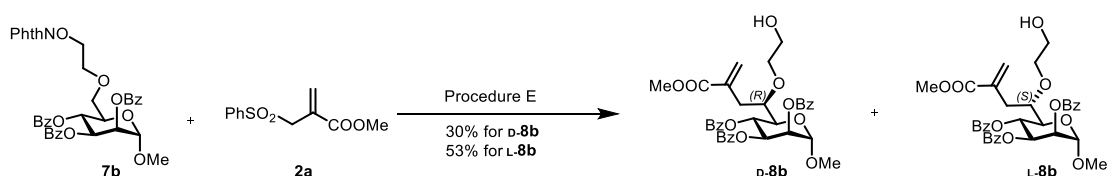

Following the general procedure E, **7b** (695.6 mg, 1.00 mmol, 1.0 equiv) and **2a** (762.9 mg, 3.00 mmol, 3.0 equiv) were treated with hantzsch ester (380.0 mg, 1.5 mmol, 1.5 equiv) and *fac*- $\text{Ir}(\text{ppy})_3$  (6.5 mg, 10.0  $\mu\text{mol}$ , 0.01 equiv) in 1,4-dioxane (20.0 mL) to give **D-8b** (191.7 mg, 295.7  $\mu\text{mol}$ , 30%) and **L-8b** (340.5 mg, 525.3  $\mu\text{mol}$ , 53%) as white foam after purification by silica gel column chromatography (PE:EA = 1.5:1).

For **D-8b**:  $[\alpha]_{\text{D}}^{25} = -73.40$  ( $c$  1.8,  $\text{CHCl}_3$ );  $^1\text{H}$  NMR (400 MHz, Chloroform- $d$ )  $\delta$  8.16 (d,  $J = 7.3$  Hz, 2H), 7.98 (d,  $J = 7.3$  Hz, 2H), 7.83 (d,  $J = 7.3$  Hz, 2H), 7.62–7.58 (m, 1H),

7.54–7.46 (m, 3H), 7.45–7.36 (m, 3H), 7.26–7.22 (m, 2H), 6.21–6.19 (m, 1H), 6.14 (t,  $J = 10.1$  Hz, 1H), 5.83 (dd,  $J = 10.0, 3.2$  Hz, 1H), 5.68–5.63 (m, 1H), 5.57 (s, 1H), 4.99–4.94 (m, 1H), 4.31 (d,  $J = 10.1$  Hz, 1H), 3.95–3.87 (m, 1H), 3.86–3.79 (m, 1H), 3.71–3.67 (m, 2H), 3.66 (s, 3H), 3.56–3.53 (m, 1H), 3.51 (s, 3H), 2.85 (brs, 1H), 2.75–2.61 (m, 2H);  $^{13}\text{C}$  NMR (101 MHz, Chloroform-*d*)  $\delta$  167.5, 165.6, 165.5, 165.4, 133.6, 133.5, 133.1, 130.0, 129.8, 129.5, 129.31, 129.25, 129.1, 128.7, 128.5, 128.3, 128.2, 127.7, 98.6, 78.7, 72.5, 71.4, 70.6, 70.5, 67.1, 62.2, 55.6, 51.9, 34.8; HRMS (ESI)  $m/z$  calcd for  $\text{C}_{35}\text{H}_{40}\text{NO}_{12}$   $[\text{M}+\text{NH}_4]^+$  666.2545, found 666.2545.

For **L-8b**:  $[\alpha]_{\text{D}}^{25} = -118.66$  ( $c$  4.7,  $\text{CHCl}_3$ );  $^1\text{H}$  NMR (400 MHz, Chloroform-*d*)  $\delta$  8.15 (d,  $J = 7.5$  Hz, 2H), 7.95 (d,  $J = 7.6$  Hz, 2H), 7.81 (d,  $J = 7.6$  Hz, 2H), 7.60 (t,  $J = 6.2$  Hz, 1H), 7.54–7.46 (m, 3H), 7.44–7.34 (m, 3H), 7.26–7.21 (m, 2H), 6.29 (s, 1H), 6.24 (t,  $J = 10.1$  Hz, 1H), 5.82 (dd,  $J = 10.1, 3.0$  Hz, 1H), 5.75 (s, 1H), 5.66 (s, 1H), 5.06 (s, 1H), 4.10 (d,  $J = 9.9$  Hz, 1H), 3.88–3.77 (m, 4H), 3.62 (s, 3H), 3.59–3.51 (m, 4H), 2.95 (dd,  $J = 14.8, 5.4$  Hz, 1H), 2.75 (dd,  $J = 13.9, 7.1$  Hz, 1H), 2.66 (brs, 1H);  $^{13}\text{C}$  NMR (101 MHz, Chloroform-*d*)  $\delta$  167.2, 166.1, 165.7, 165.6, 137.0, 133.7, 133.3, 130.1, 129.93, 129.85, 129.5, 129.3, 129.21, 129.17, 128.7, 128.61, 128.57, 128.4, 99.0, 75.1, 72.3, 70.8, 70.4, 67.0, 62.4, 56.2, 52.0, 33.4; HRMS (ESI)  $m/z$  calcd for  $\text{C}_{35}\text{H}_{40}\text{NO}_{12}$   $[\text{M}+\text{NH}_4]^+$  666.2545, found 666.2553.

**Methyl [7,8-di-deoxy-6-*O*-(2-hydroxyethyl)-1,2,3,4-di-*O*-isopropylidene-8-methylene- $\beta$ -D-glycero- $\alpha$ -D-nongalactopyranosyluronate] (D-8c) and Methyl [7,8-di-deoxy-6-*O*-(2-hydroxyethyl)-1,2,3,4-di-*O*-isopropylidene-8-methylene- $\beta$ -L-glycero- $\alpha$ -D-nongalactopyranosyluronate] (L-8c)**

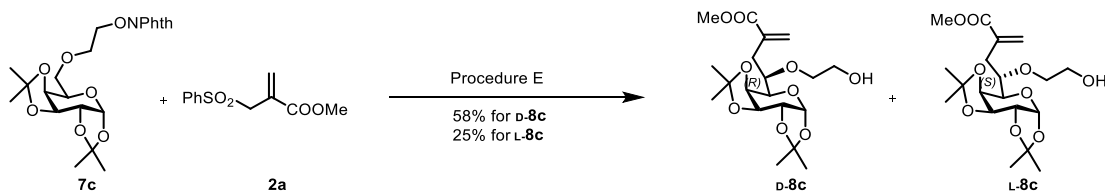

Following the general procedure E, **7c** (89.8 mg, 200.0  $\mu\text{mol}$ , 1.0 equiv) and **2a** (152.3 mg, 598.9  $\mu\text{mol}$ , 3.0 equiv) were treated with hantzsch ester (76.3 mg, 301.2  $\mu\text{mol}$ , 1.5 equiv) and *fac*-Ir(ppy)<sub>3</sub> (1.3 mg, 2.0  $\mu\text{mol}$ , 0.01 equiv) in 1,4-dioxane (4.0 mL) to give

**D-8c** (46.6 mg, 115.9  $\mu\text{mol}$ , 58%) and **L-8c** (19.8 mg, 49.2  $\mu\text{mol}$ , 25%) as white foam after purification by silica gel column chromatography (PE:EA = 2:1).

For **D-8c**:  $[\alpha]_{\text{D}}^{25} = -65.41$  (*c* 0.8,  $\text{CHCl}_3$ );  $^1\text{H NMR}$  (400 MHz, Chloroform-*d*)  $\delta$  6.22 (d,  $J = 1.5$  Hz, 1H), 5.83 (s, 1H), 5.53 (d,  $J = 5.1$  Hz, 1H), 4.62 (dd,  $J = 7.9, 2.3$  Hz, 1H), 4.44 (dd,  $J = 8.0, 1.9$  Hz, 1H), 4.31 (dd,  $J = 5.1, 2.4$  Hz, 1H), 3.87–3.69 (m, 5H), 3.69–3.56 (m, 4H), 3.47 (brs, 1H), 2.99 (dd,  $J = 14.1, 4.3$  Hz, 1H), 2.50 (dd,  $J = 14.2, 4.1$  Hz, 1H), 1.49 (s, 3H), 1.46 (s, 3H), 1.36 (s, 3H), 1.32 (s, 3H);  $^{13}\text{C NMR}$  (101 MHz, Chloroform-*d*)  $\delta$  168.3, 136.3, 128.8, 109.1, 108.5, 96.5, 76.4, 72.2, 70.8, 70.3, 67.3, 61.9, 51.9, 32.0, 25.9, 25.9, 24.9, 24.5; HRMS (ESI)  $m/z$  calcd for  $\text{C}_{19}\text{H}_{34}\text{NO}_9$   $[\text{M}+\text{NH}_4]^+$  420.2228, found 420.2232.

For **L-8c**:  $[\alpha]_{\text{D}}^{25} = -28.99$  (*c* 1.8,  $\text{CHCl}_3$ );  $^1\text{H NMR}$  (400 MHz, Chloroform-*d*)  $\delta$  6.23 (s, 1H), 5.74 (s, 1H), 5.61 (d,  $J = 5.1$  Hz, 1H), 4.59 (dd,  $J = 7.9, 2.1$  Hz, 1H), 4.31 (dd,  $J = 5.1, 2.2$  Hz, 1H), 4.27 (dd,  $J = 8.0, 1.4$  Hz, 1H), 3.85–3.79 (m, 1H), 3.77 (s, 3H), 3.74–3.71 (m, 1H), 3.65–3.56 (m, 3H), 3.30 (brs, 1H), 2.76 (dd,  $J = 13.9, 4.7$  Hz, 1H), 2.57 (dd,  $J = 13.8, 8.1$  Hz, 1H), 1.52 (s, 3H), 1.47 (s, 3H), 1.34 (s, 3H), 1.33 (s, 3H);  $^{13}\text{C NMR}$  (101 MHz, Chloroform-*d*)  $\delta$  167.8, 137.0, 128.0, 109.4, 108.6, 96.6, 78.7, 73.4, 71.6, 71.1, 70.6, 70.3, 61.9, 52.0, 34.2, 26.1, 25.9, 24.8, 24.3; HRMS (ESI)  $m/z$  calcd for  $\text{C}_{19}\text{H}_{34}\text{NO}_9$   $[\text{M}+\text{NH}_4]^+$  420.2228, found 420.2228.

**Methyl [methyl 6,7-di-deoxy-5-O-(2-hydroxyethyl)-2,3-O-isopropylidene-7-methylene-D-glycero- $\alpha$ -D-octribofuranosyluronate] (D-8d) and Methyl [methyl 6,7-di-deoxy-5-O-(2-hydroxyethyl)-2,3-O-isopropylidene-7-methylene-L-glycero- $\alpha$ -D-octribofuranosyluronate] (L-8d)**

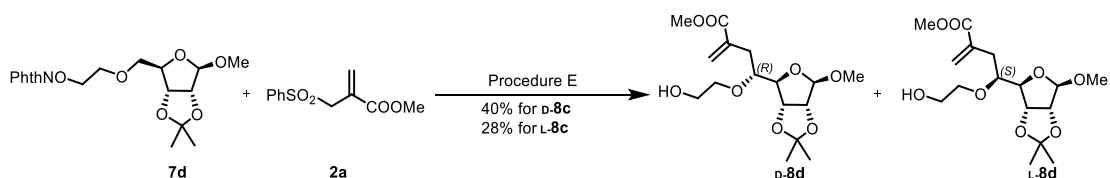

Following the general procedure E, **7d** (78.7 mg, 200.0  $\mu\text{mol}$ , 1.0 equiv) and **2a** (152.3 mg, 598.9  $\mu\text{mol}$ , 3.0 equiv) were treated with hantzsch ester (76.3 mg, 301.2  $\mu\text{mol}$ , 1.5 equiv) and *fac*-Ir(ppy)<sub>3</sub> (1.3 mg, 2.0  $\mu\text{mol}$ , 0.01 equiv) in 1,4-dioxane (4.0 mL) to give

**D-8d** (27.5 mg, 79.4  $\mu\text{mol}$ , 40%) and **L-8d** (19.3 mg, 55.8  $\mu\text{mol}$ , 28%) as white foam after purification by silica gel column chromatography (PE:EA = 2:1).

For **D-8d**:  $[\alpha]_D^{25} = -75.63$  (*c* 3.2,  $\text{CHCl}_3$ );  $^1\text{H NMR}$  (400 MHz, Chloroform-*d*)  $\delta$  6.28 (d,  $J = 1.2$  Hz, 1H), 5.74 (s, 1H), 4.97 (s, 1H), 4.81 (d,  $J = 6.0$  Hz, 1H), 4.57 (d,  $J = 6.0$  Hz, 1H), 4.13 (d,  $J = 5.2$  Hz, 1H), 3.79–3.72 (m, 4H), 3.70–3.61 (m, 2H), 3.59–3.53 (m, 1H), 3.52–3.44 (m, 1H), 3.41 (s, 3H), 3.23 (brs, 1H), 2.78–2.54 (m, 2H), 1.48 (s, 3H), 1.33 (s, 3H);  $^{13}\text{C NMR}$  (101 MHz, Chloroform-*d*)  $\delta$  167.5, 136.3, 128.7, 112.3, 110.9, 87.8, 85.7, 80.8, 79.3, 72.1, 61.8, 55.9, 52.0, 33.9, 26.6, 25.0; HRMS (ESI)  $m/z$  calcd for  $\text{C}_{16}\text{H}_{30}\text{NO}_8$   $[\text{M}+\text{NH}_4]^+$  364.1966, found 364.1970.

For **L-8d**:  $[\alpha]_D^{25} = -13.44$  (*c* 2.0,  $\text{CHCl}_3$ );  $^1\text{H NMR}$  (400 MHz, Chloroform-*d*)  $\delta$  6.26 (d,  $J = 1.2$  Hz, 1H), 5.74 (s, 1H), 5.02 (s, 1H), 4.72 (d,  $J = 6.0$  Hz, 1H), 4.56 (d,  $J = 6.0$  Hz, 1H), 4.18 (dd,  $J = 4.8, 1.7$  Hz, 1H), 3.77 (s, 3H), 3.74–3.68 (m, 1H), 3.68–3.58 (m, 3H), 3.58–3.50 (m, 1H), 3.40 (s, 3H), 3.04 (brs, 1H), 2.67–2.54 (m, 2H), 1.49 (s, 3H), 1.32 (s, 3H);  $^{13}\text{C NMR}$  (101 MHz, Chloroform-*d*)  $\delta$  167.4, 136.6, 128.5, 112.6, 110.0, 88.8, 85.6, 82.0, 78.4, 71.1, 61.9, 55.4, 52.0, 34.1, 26.8, 25.1; HRMS (ESI)  $m/z$  calcd for  $\text{C}_{16}\text{H}_{30}\text{NO}_8$   $[\text{M}+\text{NH}_4]^+$  364.1966, found 364.1968.

**Methyl [p-tolyl 6,7-di-deoxy-5-O-(2-hydroxyethyl)-2,3-O-isopropylidene-7-methylene-D-glycero-1-thio- $\alpha$ -D-octribofuranosyluronate] (D-8e) and Methyl [p-tolyl 6,7-di-deoxy-5-O-(2-hydroxyethyl)-2,3-O-isopropylidene-7-methylene-L-glycero-1-thio- $\alpha$ -D-octribofuranosyluronate] (L-8e)**

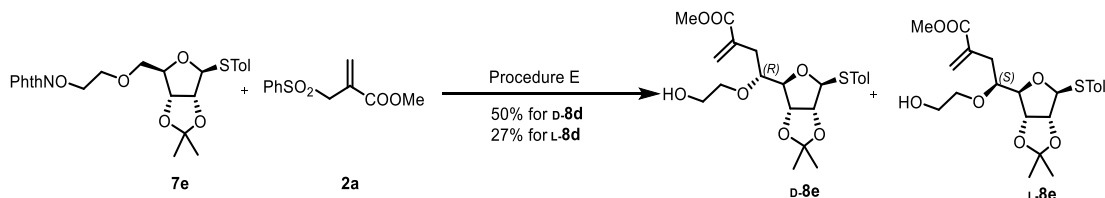

Following the general procedure E, **7e** (97.1 mg, 200.0  $\mu\text{mol}$ , 1.0 equiv) and **2a** (152.3 mg, 598.9  $\mu\text{mol}$ , 3.0 equiv) were treated with hantzsch ester (76.3 mg, 301.2  $\mu\text{mol}$ , 1.5 equiv) and *fac*-Ir(ppy)<sub>3</sub> (1.3 mg, 2.0  $\mu\text{mol}$ , 0.01 equiv) in 1,4-dioxane (4.0 mL) to give **D-8e** (43.8 mg, 100.0  $\mu\text{mol}$ , 50%) and **L-8e** (23.9 mg, 54.5  $\mu\text{mol}$ , 27%) as white foam after purification by silica gel column chromatography (PE:EA = 2:1).

For **D-8e**:  $[\alpha]_{\text{D}}^{25} = -51.63$  (*c* 0.2,  $\text{CHCl}_3$ );  $^1\text{H NMR}$  (400 MHz, Chloroform-*d*)  $\delta$  7.42–7.33 (m, 2H), 7.20–7.07 (m, 2H), 6.25 (s, 1H), 5.70 (s, 1H), 5.34 (d,  $J = 3.7$  Hz, 1H), 4.81 (dd,  $J = 6.4, 2.8$  Hz, 1H), 4.65 (dd,  $J = 6.4, 3.7$  Hz, 1H), 4.06 (dd,  $J = 5.0, 2.8$  Hz, 1H), 3.87–3.78 (m, 1H), 3.78–3.71 (m, 4H), 3.71–3.60 (m, 3H), 2.75 (s, 1H), 2.68–2.53 (m, 2H), 2.33 (s, 3H), 1.51 (s, 3H), 1.35 (s, 3H);  $^{13}\text{C NMR}$  (101 MHz, Chloroform-*d*)  $\delta$  167.7, 137.8, 136.4, 132.0, 130.2, 130.0, 128.8, 114.3, 92.3, 87.3, 85.4, 80.8, 78.4, 72.8, 62.1, 52.2, 34.1, 27.3, 25.6, 21.2; HRMS (ESI)  $m/z$  calcd for  $\text{C}_{22}\text{H}_{34}\text{NO}_7\text{S}$   $[\text{M}+\text{NH}_4]^+$  456.2050, found 456.2048.

For **L-8e**:  $[\alpha]_{\text{D}}^{25} = -91.73$  (*c* 0.3,  $\text{CHCl}_3$ );  $^1\text{H NMR}$  (400 MHz, Chloroform-*d*)  $\delta$  7.44–7.38 (m, 2H), 7.16–7.09 (m, 2H), 6.26 (d,  $J = 1.3$  Hz, 1H), 5.75 (s, 1H), 5.38 (d,  $J = 3.0$  Hz, 1H), 4.73 (dd,  $J = 6.2, 3.0$  Hz, 1H), 4.65 (dd,  $J = 6.2, 2.6$  Hz, 1H), 4.15 (dd,  $J = 5.0, 2.7$  Hz, 1H), 3.77 (s, 3H), 3.75–3.63 (m, 4H), 3.65–3.55 (m, 1H), 2.71 (dd,  $J = 13.5, 6.1$  Hz, 1H), 2.60 (dd,  $J = 13.5, 6.8$  Hz, 1H), 2.33 (s, 3H), 1.50 (s, 3H), 1.33 (s, 3H);  $^{13}\text{C NMR}$  (101 MHz, Chloroform-*d*)  $\delta$  167.6, 137.8, 136.5, 132.3, 129.9, 128.9, 114.0, 93.5, 87.6, 86.3, 82.4, 78.9, 72.1, 62.2, 52.2, 33.8, 27.3, 25.6, 21.2; HRMS (ESI)  $m/z$  calcd for  $\text{C}_{22}\text{H}_{34}\text{NO}_7\text{S}$   $[\text{M}+\text{NH}_4]^+$  456.2050, found 456.2038.

**Methyl {methyl [2,3,4-tri-*O*-benzoyl-7,8-di-deoxy-6-*O*-(2-hydroxyethyl)-8-methylene-*D*-glycero- $\alpha$ -*D*-nonmannopyranosyluronate]}-(1 $\rightarrow$ 6)-2,3,4-tri-*O*-benzoyl- $\alpha$ -*D*-mannopyranoside (**D-8f**) and Methyl {methyl [2,3,4-tri-*O*-benzoyl-7,8-di-deoxy-6-*O*-(2-hydroxyethyl)-8-methylene-*L*-glycero- $\alpha$ -*D*-nonmannopyranosyluronate]}-(1 $\rightarrow$ 6)-2,3,4-tri-*O*-benzoyl- $\alpha$ -*D*-mannopyranoside (**L-8f**)**

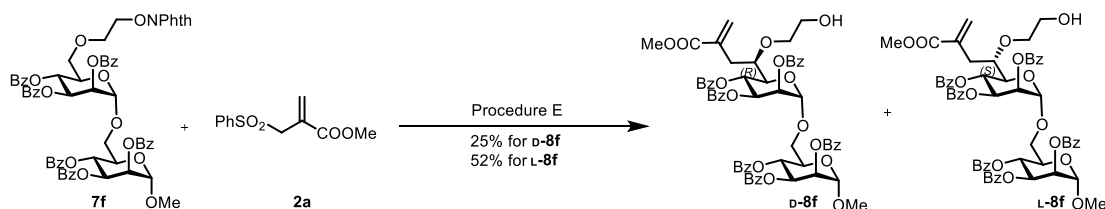

Following the general procedure E, **7f** (234.3 mg, 200.2  $\mu\text{mol}$ , 1.0 equiv) and **2a** (152.5 mg, 599.4  $\mu\text{mol}$ , 3.0 equiv) were treated with hantzsch ester (76.0 mg, 300.0  $\mu\text{mol}$ , 1.5 equiv) and *fac*- $\text{Ir}(\text{ppy})_3$  (1.3 mg, 2.0  $\mu\text{mol}$ , 0.01 equiv) in 1,4-dioxane (4.0 mL) to give **D-8f** (56.1 mg, 50.0  $\mu\text{mol}$ , 25%) and **L-8f** (117.7 mg, 104.9  $\mu\text{mol}$ , 52%) as white foam

after purification by silica gel column chromatography (PE:EA = 1.5:1).

For **D-8f**:  $[\alpha]_D^{25} = -79.74$  (*c* 2.0, CHCl<sub>3</sub>); <sup>1</sup>H NMR (400 MHz, Chloroform-*d*)  $\delta$  8.20–8.15 (m, 2H), 8.14–8.10 (m, 2H), 8.07–7.98 (m, 4H), 7.88–7.82 (m, 4H), 7.61–7.47 (m, 8H), 7.45–7.34 (m, 6H), 7.31–7.26 (m, 4H), 6.10 (s, 1H), 6.08–6.00 (m, 2H), 5.98–5.91 (m, 2H), 5.78–5.72 (m, 2H), 5.46 (s, 1H), 5.14 (s, 1H), 5.06 (s, 1H), 4.47–4.30 (m, 2H), 4.11 (dd, *J* = 10.8, 6.1 Hz, 1H), 3.78 (d, *J* = 10.6 Hz, 1H), 3.69–3.63 (m, 5H), 3.55 (s, 3H), 3.45 (s, 2H), 3.35–3.23 (m, 1H), 2.66 (s, 1H), 2.62–2.54 (m, 2H); <sup>13</sup>C NMR (101 MHz, Chloroform-*d*)  $\delta$  167.5, 165.7, 165.6, 165.53, 165.45, 165.4, 165.3, 137.4, 134.3, 133.57, 133.55, 133.5, 133.2, 133.1, 130.01, 129.98, 129.9, 129.8, 129.7, 129.6, 129.31, 129.29, 129.2, 129.1, 129.0, 128.8, 128.7, 128.6, 128.3, 128.2, 127.5, 98.7, 97.4, 78.5, 72.4, 70.6, 70.5, 70.3, 70.2, 69.5, 67.1, 67.0, 66.7, 62.0, 55.6, 51.8, 34.1; HRMS (ESI) *m/z* calcd for C<sub>62</sub>H<sub>62</sub>NO<sub>20</sub> [M+NH<sub>4</sub>]<sup>+</sup> 1140.3860, found 1140.3888.

For **L-8f**:  $[\alpha]_D^{25} = -81.14$  (*c* 4.8, CHCl<sub>3</sub>); <sup>1</sup>H NMR (400 MHz, Chloroform-*d*)  $\delta$  8.19–8.08 (m, 4H), 8.04–7.99 (m, 2H), 7.98–7.89 (m, 2H), 7.89–7.79 (m, 4H), 7.64–7.44 (m, 8H), 7.44–7.33 (m, 6H), 7.28–7.24 (m, 4H), 6.23 (t, *J* = 10.0 Hz, 1H), 6.05 (s, 1H), 5.97 (dd, *J* = 10.0, 3.3 Hz, 1H), 5.94–5.86 (m, 2H), 5.77–5.72 (m, 1H), 5.72–5.67 (m, 1H), 5.64 (s, 1H), 5.23 (s, 1H), 5.09 (s, 1H), 4.41 (t, *J* = 7.6 Hz, 1H), 4.29 (d, *J* = 10.0 Hz, 1H), 4.08 (dd, *J* = 10.7, 7.2 Hz, 1H), 3.90–3.80 (m, 1H), 3.80–3.71 (m, 4H), 3.68 (s, 3H), 3.51 (s, 4H), 2.85 (dd, *J* = 14.0, 7.3 Hz, 1H), 2.64 (dd, *J* = 14.0, 5.5 Hz, 1H); <sup>13</sup>C NMR (101 MHz, Chloroform-*d*)  $\delta$  166.9, 166.0, 165.8, 165.6, 165.49, 165.45, 165.4, 136.7, 133.63, 133.59, 133.5, 133.22, 133.17, 130.0, 129.90, 129.88, 129.8, 129.7, 129.3, 129.2, 129.1, 128.9, 128.73, 128.65, 128.6, 128.5, 128.3, 98.6, 97.3, 75.2, 72.4, 71.4, 70.5, 70.3, 70.2, 69.9, 69.4, 67.5, 67.1, 67.0, 62.3, 55.6, 51.8, 33.8; HRMS (ESI) *m/z* calcd for C<sub>62</sub>H<sub>62</sub>NO<sub>20</sub> [M+NH<sub>4</sub>]<sup>+</sup> 1140.3860, found 1140.3890.

### Elaboration of 2-hydroxyethylene moiety

**Methyl 2,3,6-tri-*O*-benzoyl-4-*O*-(2-((2-nitrophenyl)sulfonamido)ethyl)-4-*C*-[2-(methoxycarbonyl)allyl]- $\alpha$ -D-talopyranoside (9)**



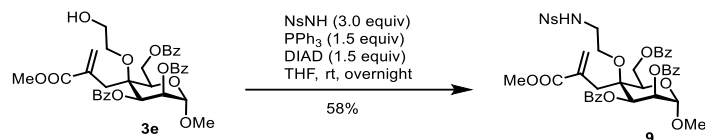

To a solution of **3e** (64.8 mg, 100.0  $\mu\text{mol}$ , 1.0 equiv),  $\text{PPh}_3$  (39.0 mg, 150.0  $\mu\text{mol}$ , 1.5 equiv) and  $\text{NsNH}_2$  (60.7 mg, 300.0  $\mu\text{mol}$ , 3.0 equiv) in THF (2.0 mL) was added diisopropylazodicarboxylate (30  $\mu\text{L}$ , 150.0  $\mu\text{mol}$ , 1.5 equiv) over 1 min at room temperature under an atmosphere. The resultant solution was stirred overnight at room temperature and quenched with saturated  $\text{NaHCO}_3$  solution. The resultant mixture was extracted with DCM, and the organic layer was washed with brine. The organic layer was collected, dried over  $\text{Na}_2\text{SO}_4$ , filtered off the solid and concentrated *in vacuo*. The resulting residue was purified by silica gel column chromatography (PhMe:EA = 10:1) to afford **9** (48.5 mg, 58.2  $\mu\text{mol}$ , 58%) as a white foam.  $[\alpha]_D^{25} = +30.91$  (*c* 1.7,  $\text{CHCl}_3$ );  $^1\text{H NMR}$  (400 MHz, Chloroform-*d*)  $\delta$  8.10–8.03 (m, 3H), 8.00–7.95 (m, 2H), 7.93–7.86 (m, 3H), 7.76–7.69 (m, 2H), 7.62–7.53 (m, 3H), 7.49–7.38 (m, 6H), 6.37 (s, 1H), 5.84 (t,  $J = 5.8$  Hz, 1H), 5.77 (s, 1H), 5.55 (s, 2H), 4.93 (s, 1H), 4.77 (d,  $J = 11.3$  Hz, 1H), 4.71–4.63 (m, 1H), 4.21 (d,  $J = 8.4$  Hz, 1H), 4.06–3.90 (m, 2H), 3.61 (s, 3H), 3.40 (s, 3H), 3.28–3.18 (m, 2H), 3.13 (d,  $J = 14.2$  Hz, 1H), 2.63 (d,  $J = 14.2$  Hz, 1H);  $^{13}\text{C NMR}$  (101 MHz, Chloroform-*d*)  $\delta$  167.2, 166.4, 165.8, 165.3, 148.3, 134.7, 133.7, 133.5, 133.4, 133.2, 132.7, 131.0, 130.7, 130.0, 129.9, 129.7, 129.6, 129.4, 129.3, 128.7, 128.6, 128.5, 125.8, 98.5, 77.6, 71.9, 69.9, 63.6, 62.9, 55.4, 53.5, 52.5, 44.5, 32.1; HRMS (ESI)  $m/z$  calcd for  $\text{C}_{41}\text{H}_{44}\text{N}_3\text{O}_{15}\text{S}$   $[\text{M}+\text{HH}_4]^+$  850.2488, found 850.2498.

**Methyl 2,3,6-tri-*O*-benzoyl-4-*O*-(2-(2,3,4,6-tetra-*O*-benzoyl- $\alpha$ -D-mannopyranosyloxy)ethyl)-4-*C*-[2-(methoxycarbonyl)allyl]- $\alpha$ -D-talopyranoside (**11**)**

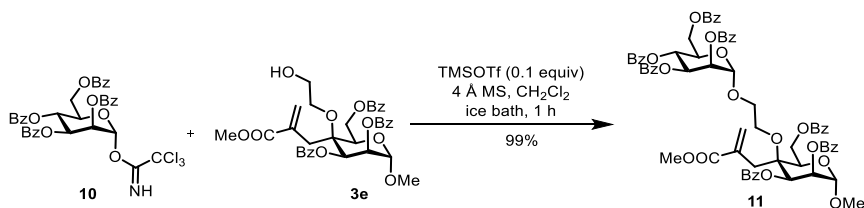

To a solution of **10** (111.2 mg, 150.0  $\mu\text{mol}$ , 1.5 equiv), **3e** (65.0 mg, 100.0  $\mu\text{mol}$ , 1.0 equiv) and freshly activated 4 Å MS in DCM (2.0 mL) was added TMSOTf (2  $\mu\text{L}$ , 1.0

$\mu\text{mol}$ , 0.1 equiv) in ice bath under an argon atmosphere. The resultant solution was stirred for 1 h in ice bath and quenched with saturated  $\text{NaHCO}_3$  solution. The resultant mixture was extracted with DCM, and the organic layer was washed with brine. The organic layer was collected, dried over  $\text{Na}_2\text{SO}_4$ , filtered off the solid and concentrated *in vacuo*. The resulting residue was purified by silica gel column chromatography (PE:EA = 2:1) to afford **11** (120.7 mg, 99%) as a white foam.  $[\alpha]_{\text{D}}^{25} = +10.20$  ( $c$  1.8,  $\text{CHCl}_3$ );  $^1\text{H}$  NMR (400 MHz, Chloroform- $d$ )  $\delta$  8.23–8.14 (m, 2H), 8.05–7.97 (m, 8H), 7.93–7.85 (m, 2H), 7.85–7.79 (m, 2H), 7.62–7.47 (m, 6H), 7.46–7.28 (m, 13H), 7.20–7.13 (m, 2H), 6.51 (s, 1H), 6.24 (t,  $J = 10.0$  Hz, 1H), 6.00–5.91 (m, 2H), 5.73–5.61 (m, 3H), 5.09–4.96 (m, 4H), 4.89 (d,  $J = 11.7$  Hz, 1H), 4.74–4.61 (m, 2H), 4.38–4.24 (m, 2H), 4.16–3.98 (m, 2H), 3.67–3.58 (m, 4H), 3.45 (s, 3H), 3.39 (d,  $J = 14.4$  Hz, 1H), 2.99 (d,  $J = 14.4$  Hz, 1H);  $^{13}\text{C}$  NMR (101 MHz, Chloroform- $d$ )  $\delta$  167.4, 166.3, 166.2, 165.8, 165.7, 165.5, 165.4, 135.1, 133.52, 133.47, 133.1, 133.0, 132.9, 131.1, 130.2, 130.1, 129.91, 129.87, 129.8, 129.7, 129.6, 129.4, 129.2, 128.8, 128.6, 128.5, 128.3, 98.6, 97.5, 77.4, 72.3, 70.5, 70.3, 70.2, 69.4, 69.0, 67.8, 66.7, 64.4, 63.7, 62.8, 55.4, 52.4, 32.2; HRMS (ESI)  $m/z$  calcd for  $\text{C}_{69}\text{H}_{66}\text{NO}_{21}$   $[\text{M}+\text{HH}_4]^+$  1244.4122, found 1244.4149.

**(5S,6R,8S,9S,10R)-6-((benzyloxy)methyl)-8-methoxy-3-(methoxycarbonyl)-3-methyl-1,7-dioxaspiro[4.5]decane-9,10-diyl dibenzoate (13) and (6S,7R,9S,10S,11R)-7-((benzyloxy)methyl)-9-methoxy-4-(methoxycarbonyl)-1,8-dioxaspiro[5.5]undecane-10,11-diyl dibenzoate (14)**

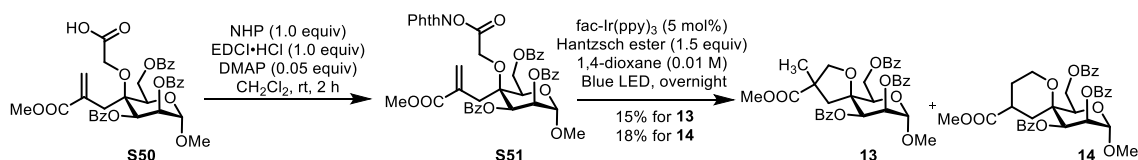

To a solution of **S50** (132.5 mg, 200.0  $\mu\text{mol}$ , 1.0 equiv) in dry DCM (3.0 mL) were added *N*-hydroxyphthalimide (32.6 mg, 100.0  $\mu\text{mol}$ , 0.1 equiv), EDCI·HCl (38.3 mg, 200.0  $\mu\text{mol}$ , 1.0 equiv) and DMAP (0.3 mg, 2.5  $\mu\text{mol}$ , 0.013 equiv) at room temperature under an argon atmosphere. The resultant solution was stirred for 2 h at room temperature and quenched with saturated  $\text{NaHCO}_3$  solution. The resultant mixture was

extracted with DCM, and the organic layer was washed with brine. The organic layer was collected, dried over Na<sub>2</sub>SO<sub>4</sub>, filtered off the solid and concentrated *in vacuo* to give the crude product **S51** without further purification for next step. The crude product obtained above, *fac*-Ir(ppy)<sub>3</sub> (6.5 mg, 10.0 μmol, 0.05 equiv) and hantzsch ester (76.0 mg, 300.0 μmol, 1.5 equiv) were placed in a 100 mL clear-colored glass bottle. After 1,4-dioxane (20.0 mL) was added, the reaction was exchanged three times using argon gas and exposed to blue LEDs (450 nm-470 nm) at 35 °C with stirring overnight. The resultant mixture was diluted with DCM and washed with saturated NaHCO<sub>3</sub> solution and brine. The organic layer was collected, dried over Na<sub>2</sub>SO<sub>4</sub>, filtered off the solid and concentrated *in vacuo*. The resulting residue was purified by silica gel column chromatography (PE:EA = 8:1) to afford **13** (18.5 mg, 29.9 μmol, 15%) and **14** (21.7 mg, 35.1 μmol, 18%) as white foam.

For **13**:  $[\alpha]_{\text{D}}^{25} = -27.22$  (*c* 0.8, CHCl<sub>3</sub>); <sup>1</sup>H NMR (400 MHz, Chloroform-*d*) δ 8.16–8.10 (m, 2H), 8.10–8.04 (m, 2H), 7.96–7.90 (m, 2H), 7.61–7.51 (m, 3H), 7.50–7.42 (m, 4H), 7.42–7.34 (m, 2H), 5.63 (d, *J* = 3.5 Hz, 1H), 5.42 (t, *J* = 3.1 Hz, 1H), 5.04 (d, *J* = 2.6 Hz, 1H), 4.73–4.65 (m, 2H), 4.55 (d, *J* = 9.0 Hz, 1H), 4.32–4.24 (m, 1H), 3.88 (d, *J* = 9.0 Hz, 1H), 3.78 (s, 3H), 3.44 (s, 3H), 2.98 (d, *J* = 14.4 Hz, 1H), 1.94 (d, *J* = 14.5 Hz, 1H), 1.20 (s, 3H); <sup>13</sup>C NMR (101 MHz, Chloroform-*d*) δ 176.4, 166.6, 165.9, 165.6, 133.5, 133.3, 133.1, 130.2, 130.1, 129.9, 129.8, 129.6, 129.2, 128.6, 128.5, 128.4, 98.2, 83.6, 78.3, 73.4, 72.7, 69.3, 62.9, 55.4, 52.8, 50.5, 42.9, 22.8; HRMS (ESI) *m/z* calcd for C<sub>34</sub>H<sub>38</sub>NO<sub>11</sub> [M+HH<sub>4</sub>]<sup>+</sup> 636.2439, found 636.2444.

For **14**:  $[\alpha]_{\text{D}}^{25} = +63.47$  (*c* 0.9, CHCl<sub>3</sub>); <sup>1</sup>H NMR (400 MHz, Chloroform-*d*) δ 8.15–8.05 (m, 4H), 7.91–7.85 (m, 2H), 7.64–7.56 (m, 2H), 7.55–7.44 (m, 5H), 7.37–7.29 (m, 2H), 5.78 (d, *J* = 2.9 Hz, 1H), 5.63–5.47 (m, 1H), 5.36 (dd, *J* = 7.4, 3.3 Hz, 1H), 5.26 (d, *J* = 7.4 Hz, 1H), 4.62–4.52 (m, 2H), 3.93 (d, *J* = 12.5 Hz, 1H), 3.75–3.64 (m, 4H), 3.45 (s, 3H), 2.90–2.72 (m, 1H), 2.66–2.51 (m, 1H), 2.01–1.77 (m, 3H); <sup>13</sup>C NMR (101 MHz, Chloroform-*d*) δ 174.1, 166.8, 165.7, 165.2, 133.4, 133.3, 133.2, 130.0, 129.8, 129.7, 129.5, 128.7, 128.5, 128.3, 96.4, 74.6, 74.1, 73.0, 69.0, 61.8, 60.7, 56.7, 52.2, 35.8, 31.6, 26.7; HRMS (ESI) *m/z* calcd for C<sub>34</sub>H<sub>38</sub>NO<sub>11</sub> [M+HH<sub>4</sub>]<sup>+</sup> 636.2439, found 636.2448.

## Removal of directing group 2-hydroxyethylene moiety

### General Procedure F: Curtius rearrangement reaction

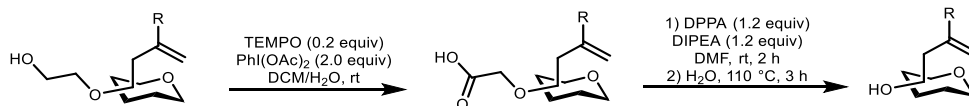

To a solution of **alcohol** (1.0 equiv) in DCM/H<sub>2</sub>O (*v/v* = 10:1) were added TEMPO (0.2 equiv) and PhI(OAc)<sub>2</sub> (2.0 equiv) at room temperature under an argon atmosphere. The resultant solution was stirred for 12 h and quenched with Na<sub>2</sub>S<sub>2</sub>O<sub>3</sub> solution. The resultant mixture was extracted with DCM, and the organic layer was washed and brine. The organic layer was collected, dried over Na<sub>2</sub>SO<sub>4</sub>, filtered off the solid and concentrated *in vacuo*. The resulting residue was purified by silica gel column chromatography for next step without further characterization. The crude product obtained as above was dissolved in DMF, diphenylphosphoryl azide (DPPA) (1.2 equiv) and *N,N*-diisopropylethylamine (DIPEA) (1.2 equiv) were added in ice bath under an argon atmosphere. After stirring for 2 h at room temperature, H<sub>2</sub>O (0.5 mL) was added to the reaction mixture. The resultant solution was heat to 110 °C for 3 h. The resultant mixture was extracted with DCM, and the organic layer was washed sequentially with 1M HCl solution, saturated NaHCO<sub>3</sub> solution and brine. The organic layer was collected, dried over Na<sub>2</sub>SO<sub>4</sub>, filtered off the solid and concentrated *in vacuo*. The residue was purified by flash silica gel column chromatography to give the desired product.

### Methyl 2,3,6-tri-*O*-benzoyl-4-*C*-[2-(methoxycarbonyl)allyl]- $\alpha$ -*D*-talopyranoside (15)

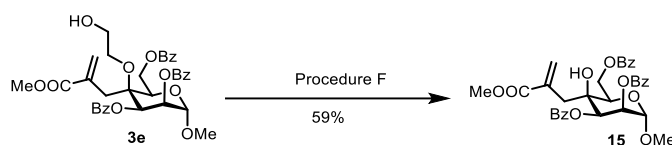

Following the general procedure F, **3e** (648.7 mg, 1.00 mmol, 1.0 equiv) was treated with TEMPO (15.6 mg, 100.0  $\mu$ mol, 0.1 equiv) and PhI(OAc)<sub>2</sub> (644.2 mg, 2.00 mmol, 2.0 equiv) in DCM/H<sub>2</sub>O (11.0 mL, *v/v* = 10:1) to give the acid (569.3 mg, 859.1  $\mu$ mol,

86%) as a white foam. The acid (324.7 mg, 490.0  $\mu\text{mol}$ , 1.0 equiv) was treated with DPPA (127  $\mu\text{L}$ , 588.0  $\mu\text{mol}$ , 1.2 equiv) and DIPEA (102  $\mu\text{L}$ , 588.0  $\mu\text{mol}$ , 1.2 equiv) in DMF (5.0 mL) to give **15** (203.4 mg, 336.4  $\mu\text{mol}$ , 69%) as a white foam after purification by silica gel column chromatography (PE:EA = 3:1).  $[\alpha]_{\text{D}}^{25} = -13.05$  ( $c$  1.0,  $\text{CHCl}_3$ );  $^1\text{H}$  NMR (400 MHz, Chloroform- $d$ )  $\delta$  8.11–8.03 (m, 2H), 8.02–7.94 (m, 2H), 7.94–7.87 (m, 2H), 7.63–7.55 (m, 2H), 7.55–7.41 (m, 5H), 7.41–7.31 (m, 2H), 6.16 (s, 1H), 5.74 (s, 1H), 5.55 (dd,  $J = 3.8, 1.8$  Hz, 1H), 5.41 (d,  $J = 3.8$  Hz, 1H), 5.08–4.86 (m, 2H), 4.81–4.60 (m, 1H), 4.21 (dd,  $J = 8.1, 2.3$  Hz, 1H), 4.08 (s, 1H), 3.45 (s, 3H), 3.40 (s, 3H), 2.90 (d,  $J = 14.3$  Hz, 1H), 2.74 (d,  $J = 14.3$  Hz, 1H);  $^{13}\text{C}$  NMR (101 MHz, Chloroform- $d$ )  $\delta$  168.4, 166.7, 165.5, 165.0, 135.5, 133.6, 133.4, 133.3, 130.1, 130.0, 129.9, 129.7, 129.5, 129.4, 128.7, 128.6, 128.4, 98.6, 73.4, 72.9, 69.4, 69.3, 63.8, 55.5, 52.2, 38.3; HRMS (ESI)  $m/z$  calcd for  $\text{C}_{33}\text{H}_{36}\text{NO}_{11}$   $[\text{M}+\text{NH}_4]^+$  622.2283, found 622.2296.

**Methyl 2,3,6-tri-*O*-benzoyl-4-*C*-[2-(methoxycarbonyl)allyl]- $\alpha$ -*D*-galactopyranoside (**S52**) and Methyl 2,3,6-tri-*O*-benzoyl-3'-methylenespiro(4-deoxy- $\alpha$ -*D*-galactopyranose-4,5'-tetrahydrofuran-1-one) (**S53**)**

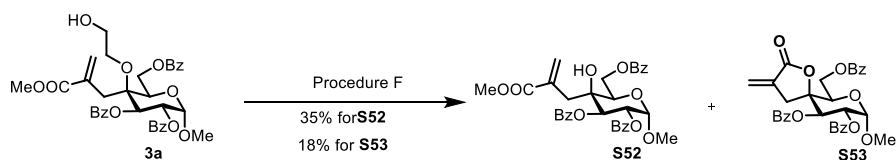

Following the general procedure F, **3a** (64.8 mg, 100.0  $\mu\text{mol}$ , 1.0 equiv) was treated with TEMPO (3.2 mg, 20.0  $\mu\text{mol}$ , 0.2 equiv) and  $\text{PhI}(\text{OAc})_2$  (64.4 mg, 200.0  $\mu\text{mol}$ , 2.0 equiv) in  $\text{DCM}/\text{H}_2\text{O}$  (3.3 mL,  $v/v = 10:1$ ) to give the acid (63.2 mg, 95.5  $\mu\text{mol}$ , 96%) as a colorless oil. The acid (36.5 mg, 55.1  $\mu\text{mol}$ , 1.0 equiv) was treated with DPPA (14  $\mu\text{L}$ , 66.1  $\mu\text{mol}$ , 1.2 equiv) and DIPEA (12  $\mu\text{L}$ , 66.1  $\mu\text{mol}$ , 1.2 equiv) in DMF (1.0 mL) to give **S52** (11.5 mg, 19.0  $\mu\text{mol}$ , 35%) and **S53** (5.7 mg, 10.0  $\mu\text{mol}$ , 18%) as white foam after purification by silica gel column chromatography (PE:EA = 4:1).

For **S52**:  $[\alpha]_{\text{D}}^{25} = +47.08$  ( $c$  1.1,  $\text{CHCl}_3$ );  $^1\text{H}$  NMR (400 MHz, Chloroform- $d$ )  $\delta$  8.12–8.03 (m, 2H), 7.93–7.86 (m, 4H), 7.58 (t,  $J = 7.4$  Hz, 1H), 7.50–7.42 (m, 4H), 7.39–7.30 (m, 4H), 5.99 (s, 1H), 5.76 (s, 1H), 5.71 (d,  $J = 10.0$  Hz, 1H), 5.46 (dd,  $J = 10.0, 3.7$  Hz,

1H), 5.43 (s, 1H), 5.25 (d,  $J = 3.6$  Hz, 1H), 4.94 (dd,  $J = 12.0, 2.7$  Hz, 1H), 4.59 (dd,  $J = 11.9, 7.7$  Hz, 1H), 4.15 (dd,  $J = 7.6, 2.2$  Hz, 1H), 3.38 (s, 3H), 3.29 (s, 3H), 2.92 (d,  $J = 14.5$  Hz, 1H), 2.63 (d,  $J = 14.5$  Hz, 1H);  $^{13}\text{C}$  NMR (101 MHz, Chloroform-*d*)  $\delta$  169.7, 166.8, 166.1, 165.5, 135.2, 133.3, 133.2, 130.1, 130.0, 129.9, 129.5, 128.6, 128.4, 97.0, 75.1, 73.1, 71.8, 71.4, 63.8, 55.4, 52.3, 41.1; HRMS (ESI)  $m/z$  calcd for  $\text{C}_{33}\text{H}_{32}\text{O}_{11}\text{Na}$   $[\text{M}+\text{Na}]^+$  627.1837, found 627.1840.

For **S53**:  $[\alpha]_{\text{D}}^{25} = +48.03$  ( $c$  0.4,  $\text{CHCl}_3$ );  $^1\text{H}$  NMR (400 MHz, Chloroform-*d*)  $\delta$  8.09–8.02 (m, 2H), 7.94–7.87 (m, 4H), 7.60 (t,  $J = 7.4$  Hz, 1H), 7.54–7.44 (m, 4H), 7.40–7.31 (m, 4H), 6.18–6.11 (m, 1H), 5.98 (d,  $J = 10.5$  Hz, 1H), 5.53 (s, 1H), 5.50 (dd,  $J = 10.4, 3.4$  Hz, 1H), 5.31 (d,  $J = 3.5$  Hz, 1H), 4.69 (dd,  $J = 12.0, 2.8$  Hz, 1H), 4.46 (dd,  $J = 12.0, 6.8$  Hz, 1H), 4.32 (dd,  $J = 6.7, 2.7$  Hz, 1H), 3.42 (s, 3H), 3.23 (dt,  $J = 18.3, 2.8$  Hz, 1H), 2.98 (d,  $J = 18.3$  Hz, 1H);  $^{13}\text{C}$  NMR (101 MHz, Chloroform-*d*)  $\delta$  168.9, 166.6, 166.1, 165.8, 133.9, 133.7, 133.4, 132.5, 130.0, 130.0, 129.8, 129.5, 129.2, 128.7, 128.5, 123.5, 97.1, 82.9, 71.6, 70.8, 70.4, 62.8, 55.8, 32.2; HRMS (ESI)  $m/z$  calcd for  $\text{C}_{32}\text{H}_{28}\text{O}_{10}\text{Na}$   $[\text{M}+\text{Na}]^+$  595.1575, found 595.1578.

***p*-Tolyl 2,3-*O*-isopropylidene-4-*C*-[2-(methoxycarbonyl)allyl]-1-thio- $\alpha$ -L-talopyranoside (**S54**)**

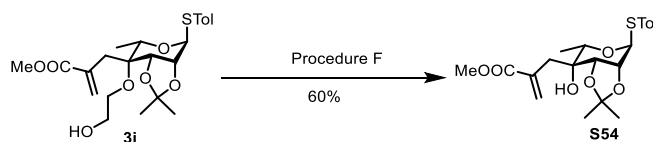

Following the general procedure F, **3j** (101.2 mg, 223.6  $\mu\text{mol}$ , 1.0 equiv) was treated with TEMPO (7.0 mg, 44.7  $\mu\text{mol}$ , 0.2 equiv) and  $\text{PhI}(\text{OAc})_2$  (144.1 mg, 447.2  $\mu\text{mol}$ , 2.0 equiv) in  $\text{DCM}/\text{H}_2\text{O}$  (3.3 mL,  $v/v = 10:1$ ) to give the acid (101.6 mg, 223.6  $\mu\text{mol}$ , 100%) as a colorless oil. The acid (101.6 mg, 223.6  $\mu\text{mol}$ , 1.0 equiv) was treated with DPPA (58  $\mu\text{L}$ , 268.3  $\mu\text{mol}$ , 1.2 equiv) and DIPEA (46  $\mu\text{L}$ , 268.3  $\mu\text{mol}$ , 1.2 equiv) in DMF (1.0 mL) to give **S54** (54.3 mg, 132.9  $\mu\text{mol}$ , 60%) as a white foam after purification by silica gel column chromatography (PE:EA = 3:1).  $[\alpha]_{\text{D}}^{25} = -127.40$  ( $c$  1.3,  $\text{CHCl}_3$ );  $^1\text{H}$  NMR (400 MHz, Chloroform-*d*)  $\delta$  7.39 (d,  $J = 8.0$  Hz, 2H), 7.12 (d,  $J = 7.9$  Hz, 2H), 6.26 (s, 1H), 5.68 (s, 1H), 5.59 (d,  $J = 2.2$  Hz, 1H), 4.20–4.13 (m, 2H), 4.07–

4.00 (m, 1H), 3.77 (s, 3H), 3.23 (s, 1H), 2.53 (d,  $J = 13.7$  Hz, 1H), 2.44 (d,  $J = 13.7$  Hz, 1H), 2.33 (s, 3H), 1.50 (s, 3H), 1.30 (s, 3H), 1.26 (d,  $J = 6.4$  Hz, 3H);  $^{13}\text{C}$  NMR (101 MHz, Chloroform- $d$ )  $\delta$  168.7, 137.8, 136.4, 132.5, 129.83, 129.75, 129.1, 109.6, 83.0, 75.8, 74.7, 71.1, 70.7, 52.2, 40.1, 26.3, 25.6, 21.2, 13.9; HRMS (ESI)  $m/z$  calcd for  $\text{C}_{21}\text{H}_{29}\text{O}_6\text{S}$   $[\text{M}+\text{H}]^+$  409.1679, found 409.1683.

**Methyl 2,4,6-tri-*O*-benzoyl-3-*C*-[2-(methoxycarbonyl)allyl]- $\alpha$ -D-mannopyranoside (S55)**

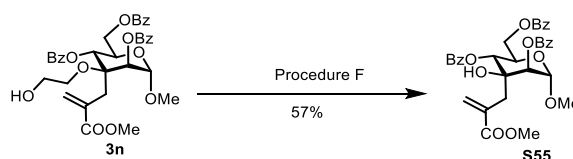

Following the general procedure F, **3n** (25.7 mg, 39.6  $\mu\text{mol}$ , 1.0 equiv) was treated with TEMPO (1.3 mg, 7.9  $\mu\text{mol}$ , 0.2 equiv) and  $\text{PhI}(\text{OAc})_2$  (25.5 mg, 79.2  $\mu\text{mol}$ , 2.0 equiv) in  $\text{DCM}/\text{H}_2\text{O}$  (3.3 mL,  $v/v = 10:1$ ) to give the acid (26.2 mg, 39.6  $\mu\text{mol}$ , 100%) as a colorless oil. The acid (26.2 mg, 39.6  $\mu\text{mol}$ , 1.0 equiv) was treated with DPPA (10  $\mu\text{L}$ , 47.5  $\mu\text{mol}$ , 1.2 equiv) and DIPEA (8  $\mu\text{L}$ , 47.5  $\mu\text{mol}$ , 1.2 equiv) in DMF (1.0 mL) to give **S55** (13.7 mg, 22.7  $\mu\text{mol}$ , 57%) as a white foam after purification by silica gel column chromatography (PE:EA = 3:1).  $[\alpha]_{\text{D}}^{25} = -19.56$  ( $c$  0.4,  $\text{CHCl}_3$ );  $^1\text{H}$  NMR (400 MHz, Chloroform- $d$ )  $\delta$  8.12–8.05 (m, 6H), 7.64–7.52 (m, 3H), 7.49–7.38 (m, 6H), 6.38 (s, 1H), 5.91 (s, 1H), 5.63 (d,  $J = 8.3$  Hz, 1H), 5.39 (d,  $J = 2.9$  Hz, 1H), 4.98 (d,  $J = 2.8$  Hz, 1H), 4.68 (dd,  $J = 12.3, 6.4$  Hz, 1H), 4.61 (dd,  $J = 12.0, 2.9$  Hz, 1H), 4.44–4.36 (m, 1H), 4.34 (s, 1H), 3.70 (s, 3H), 3.48 (s, 3H), 3.24–3.07 (m, 2H);  $^{13}\text{C}$  NMR (101 MHz, Chloroform- $d$ )  $\delta$  170.1, 166.4, 166.0, 165.9, 134.9, 133.7, 133.5, 133.2, 131.4, 130.1, 130.0, 129.9, 129.8, 129.5, 128.7, 128.6, 128.5, 99.3, 73.3, 72.9, 72.6, 63.5, 56.0, 52.7, 29.8; HRMS (ESI)  $m/z$  calcd for  $\text{C}_{33}\text{H}_{33}\text{O}_{11}$   $[\text{M}+\text{H}]^+$  605.2017, found 605.2023.

**Methyl 6-*O*-*tert*-butyldiphenylsilyl-3,4-*O*-isopropylidene-2-*C*-[2-(methoxycarbonyl)allyl]- $\alpha$ -D-talopyranoside (S56)**

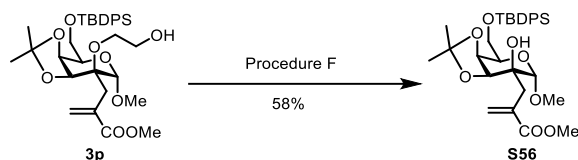

Following the general procedure F, **3p** (45.7 mg, 74.3  $\mu\text{mol}$ , 1.0 equiv) was treated with TEMPO (2.3 mg, 14.9  $\mu\text{mol}$ , 0.2 equiv) and  $\text{PhI}(\text{OAc})_2$  (47.9 mg, 148.6  $\mu\text{mol}$ , 2.0 equiv) in  $\text{DCM}/\text{H}_2\text{O}$  (3.3 mL,  $v/v = 10:1$ ) to give the acid (46.7 mg, 74.3  $\mu\text{mol}$ , 100%) as a colorless oil. The acid (46.7 mg, 74.3  $\mu\text{mol}$ , 1.0 equiv) was treated with DPPA (19  $\mu\text{L}$ , 89.2  $\mu\text{mol}$ , 1.2 equiv) and DIPEA (15  $\mu\text{L}$ , 89.2  $\mu\text{mol}$ , 1.2 equiv) in DMF (1.0 mL) to give **S56** (24.8 mg, 43.5  $\mu\text{mol}$ , 58%) as a white foam after purification by silica gel column chromatography (PE:EA = 3:1).  $[\alpha]_{\text{D}}^{25} = +33.24$  ( $c$  0.8,  $\text{CHCl}_3$ );  $^1\text{H}$  NMR (400 MHz, Chloroform- $d$ )  $\delta$  7.78–7.63 (m, 4H), 7.47–7.32 (m, 6H), 6.24–6.17 (m, 1H), 5.63 (s, 1H), 4.44 (s, 1H), 4.24 (dd,  $J = 5.7, 2.6$  Hz, 1H), 4.12 (d,  $J = 5.7$  Hz, 1H), 4.05–3.95 (m, 2H), 3.95–3.84 (m, 1H), 3.75 (s, 3H), 3.28 (s, 3H), 2.84 (d,  $J = 13.6$  Hz, 1H), 2.68 (s, 1H), 2.46 (d,  $J = 13.7$  Hz, 1H), 1.54 (s, 3H), 1.33 (s, 3H), 1.05 (s, 9H);  $^{13}\text{C}$  NMR (101 MHz, Chloroform- $d$ )  $\delta$  168.6, 136.6, 135.8, 133.7, 133.6, 129.8, 127.9, 127.81, 127.75, 109.3, 102.7, 74.0, 71.7, 70.2, 67.3, 63.1, 55.2, 52.0, 37.1, 26.9, 25.9, 19.3; HRMS (ESI)  $m/z$  calcd for  $\text{C}_{31}\text{H}_{46}\text{NO}_8\text{Si}$   $[\text{M}+\text{NH}_4]^+$  588.2987, found 588.2995.

**Methyl [methyl 2,3,4-tri-*O*-benzoyl-7,8-di-deoxy-8-methylene-D-glycero- $\alpha$ -D-nonglucopyranosyluronate] (S57)**

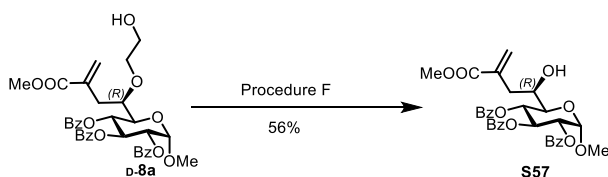

Following the general procedure F, **d-8a** (36.6 mg, 56.4  $\mu\text{mol}$ , 1.0 equiv) was treated with TEMPO (1.8 mg, 11.3  $\mu\text{mol}$ , 0.2 equiv) and  $\text{PhI}(\text{OAc})_2$  (36.3 mg, 112.8  $\mu\text{mol}$ , 2.0 equiv) in  $\text{DCM}/\text{H}_2\text{O}$  (3.3 mL,  $v/v = 10:1$ ) to give the acid (37.3 mg, 56.4  $\mu\text{mol}$ , 100%) as a colorless oil. The acid (37.3 mg, 56.4  $\mu\text{mol}$ , 1.0 equiv) was treated with DPPA (15  $\mu\text{L}$ , 67.7  $\mu\text{mol}$ , 1.2 equiv) and DIPEA (12  $\mu\text{L}$ , 67.7  $\mu\text{mol}$ , 1.2 equiv) in DMF (1.0 mL) to give **S57** (19.1 mg, 31.6  $\mu\text{mol}$ , 56%) as a white foam after purification by silica gel column chromatography (PE:EA = 3:1).  $[\alpha]_{\text{D}}^{25} = +38.84$  ( $c$  0.3,  $\text{CHCl}_3$ );  $^1\text{H}$  NMR (400



MHz, Chloroform-*d*)  $\delta$  8.05–7.91 (m, 4H), 7.87 (d,  $J = 7.3$  Hz, 2H), 7.54–7.44 (m, 2H), 7.44–7.34 (m, 5H), 7.33–7.28 (m, 2H), 6.27 (s, 1H), 6.16 (t,  $J = 9.7$  Hz, 1H), 5.75 (s, 1H), 5.60 (t,  $J = 9.9$  Hz, 1H), 5.31–5.18 (m, 2H), 4.24 (dd,  $J = 10.4, 2.8$  Hz, 1H), 3.91 (d,  $J = 9.6$  Hz, 1H), 3.69 (s, 3H), 3.49 (s, 3H), 2.87–2.79 (m, 1H), 2.75 (s, 1H), 2.64 (dd,  $J = 14.1, 9.9$  Hz, 1H);  $^{13}\text{C}$  NMR (101 MHz, Chloroform-*d*)  $\delta$  168.5, 166.0, 165.9, 165.7, 137.3, 133.6, 133.5, 133.2, 130.1, 130.0, 129.8, 129.4, 129.2, 129.1, 128.6, 128.5, 128.4, 96.9, 72.3, 71.7, 70.8, 70.7, 70.1, 55.7, 52.3, 34.3; HRMS (ESI)  $m/z$  calcd for  $\text{C}_{33}\text{H}_{33}\text{O}_{11}$   $[\text{M}+\text{H}]^+$  605.2017, found 605.2032.

**Methyl [methyl 2,3,4-tri-*O*-benzoyl-7,8-di-deoxy-8-methylene-*L*-glycero- $\alpha$ -*D*-nonglucopyranosyluronate] (S58)**

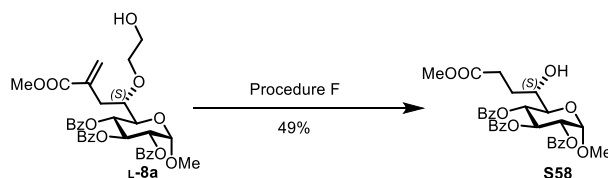

Following the general procedure F, **L-8a** (45.7 mg, 70.5  $\mu\text{mol}$ , 1.0 equiv) was treated with TEMPO (2.2 mg, 14.1  $\mu\text{mol}$ , 0.2 equiv) and  $\text{PhI}(\text{OAc})_2$  (45.4 mg, 141.0  $\mu\text{mol}$ , 2.0 equiv) in  $\text{DCM}/\text{H}_2\text{O}$  (3.3 mL,  $v/v = 10:1$ ) to give the acid (46.7 mg, 70.5  $\mu\text{mol}$ , 100%) as a colorless oil. The acid (46.7 mg, 70.5  $\mu\text{mol}$ , 100%) was treated with DPPA (18  $\mu\text{L}$ , 84.6  $\mu\text{mol}$ , 1.2 equiv) and DIPEA (15  $\mu\text{L}$ , 84.6  $\mu\text{mol}$ , 1.2 equiv) in DMF (1.0 mL) to give **S58** (20.9 mg, 34.6  $\mu\text{mol}$ , 49%) as a white foam after purification by silica gel column chromatography (PE:EA = 3:1).  $[\alpha]_{\text{D}}^{25} = +35.11$  ( $c$  1.0,  $\text{CHCl}_3$ );  $^1\text{H}$  NMR (400 MHz, Chloroform-*d*)  $\delta$  8.03–7.92 (m, 4H), 7.92–7.77 (m, 2H), 7.59–7.47 (m, 2H), 7.46–7.34 (m, 5H), 7.32–7.27 (m, 2H), 6.28 (s, 1H), 6.21 (t,  $J = 9.8$  Hz, 1H), 5.76 (s, 1H), 5.61 (t,  $J = 9.9$  Hz, 1H), 5.31–5.25 (m, 2H), 3.98 (d,  $J = 10.0$  Hz, 1H), 3.91–3.83 (m, 1H), 3.66 (s, 3H), 3.47 (s, 3H), 2.82 (dd,  $J = 14.1, 9.7$  Hz, 1H), 2.57 (dd,  $J = 14.2, 3.0$  Hz, 1H);  $^{13}\text{C}$  NMR (101 MHz, Chloroform-*d*)  $\delta$  167.7, 166.7, 165.9, 136.9, 133.8, 133.5, 133.3, 130.2, 130.1, 129.8, 129.2, 128.7, 128.6, 128.4, 97.4, 72.1, 71.2, 70.3, 70.2, 67.2, 56.0, 52.1, 35.9; HRMS (ESI)  $m/z$  calcd for  $\text{C}_{33}\text{H}_{33}\text{O}_{11}$   $[\text{M}+\text{H}]^+$  605.2017, found 605.2023.

**Methyl [methyl 2,3,4-tri-*O*-benzoyl-7,8-di-deoxy-8-methylene-D-glycero- $\alpha$ -D-nonmannopyranosyluronate] (S59)**

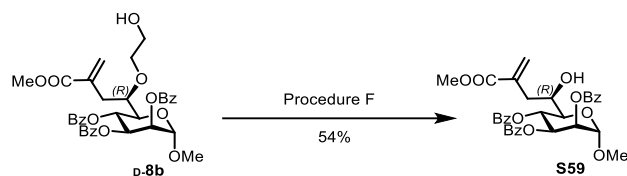

Following the general procedure F, **d-8b** (38.9 mg, 60.0  $\mu\text{mol}$ , 1.0 equiv) was treated with TEMPO (1.9 mg, 12.0  $\mu\text{mol}$ , 0.2 equiv) and  $\text{PhI}(\text{OAc})_2$  (38.7 mg, 120.1  $\mu\text{mol}$ , 2.0 equiv) in  $\text{DCM}/\text{H}_2\text{O}$  (3.3 mL,  $v/v = 10:1$ ) to give the acid (38.9 mg, 58.7  $\mu\text{mol}$ , 98%) as a colorless oil. The acid (38.9 mg, 58.7  $\mu\text{mol}$ , 1.0 equiv) was treated with DPPA (16  $\mu\text{L}$ , 70.4  $\mu\text{mol}$ , 1.2 equiv) and DIPEA (12  $\mu\text{L}$ , 70.4  $\mu\text{mol}$ , 1.2 equiv) in DMF (1.0 mL) to give **S59** (19.7 mg, 32.6  $\mu\text{mol}$ , 55%) as a white foam after purification by silica gel column chromatography (PE:EA = 3:1).  $[\alpha]_{\text{D}}^{25} = -28.88$  ( $c$  0.7,  $\text{CHCl}_3$ );  $^1\text{H}$  NMR (400 MHz, Chloroform-*d*)  $\delta$  8.11–8.06 (m, 2H), 8.00–7.95 (m, 2H), 7.86–7.81 (m, 2H), 7.64–7.58 (m, 1H), 7.54–7.46 (m, 3H), 7.45–7.35 (m, 3H), 7.26–7.23 (m, 2H), 6.27 (d,  $J = 1.2$  Hz, 1H), 5.96–5.90 (m, 1H), 5.87 (dd,  $J = 9.8, 3.1$  Hz, 1H), 5.76 (s, 1H), 5.67 (dd,  $J = 3.0, 1.8$  Hz, 1H), 5.00 (d,  $J = 1.6$  Hz, 1H), 4.26 (dd,  $J = 9.6, 2.8$  Hz, 1H), 3.97 (dt,  $J = 10.2, 2.6$  Hz, 1H), 3.66 (s, 3H), 3.53 (s, 3H), 2.92 (dd,  $J = 14.2, 2.0$  Hz, 1H), 2.67 (dd,  $J = 14.2, 10.3$  Hz, 1H);  $^{13}\text{C}$  NMR (101 MHz, Chloroform-*d*)  $\delta$  168.4, 165.8, 165.5, 137.3, 133.6, 133.5, 133.2, 129.9, 129.8, 129.7, 129.4, 129.2, 129.1, 128.7, 128.5, 128.4, 128.3, 98.5, 72.7, 70.8, 70.6, 70.3, 67.6, 55.5, 52.1, 34.1; HRMS (ESI)  $m/z$  calcd for  $\text{C}_{33}\text{H}_{33}\text{O}_{11}$   $[\text{M}+\text{H}]^+$  605.2017, found 605.2029.

**Methyl [methyl 2,3,4-tri-*O*-benzoyl-7,8-di-deoxy-8-methylene-L-glycero- $\alpha$ -D-nonmannopyranosyluronate] (S60)**

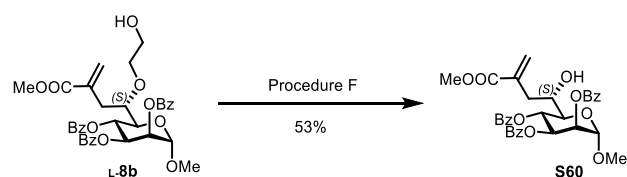

Following the general procedure F, **L-8b** (38.9 mg, 60.0  $\mu\text{mol}$ , 1.0 equiv) was treated

with TEMPO (1.9 mg, 12.0  $\mu\text{mol}$ , 0.2 equiv) and  $\text{PhI}(\text{OAc})_2$  (38.7 mg, 120.1  $\mu\text{mol}$ , 2.0 equiv) in  $\text{DCM}/\text{H}_2\text{O}$  (3.3 mL,  $v/v = 10:1$ ) to give the acid (39.4 mg, 59.4  $\mu\text{mol}$ , 99%) as a colorless oil. The acid (39.4 mg, 59.4  $\mu\text{mol}$ , 1.0 equiv) was treated with DPPA (16  $\mu\text{L}$ , 71.3  $\mu\text{mol}$ , 1.2 equiv) and DIPEA (12  $\mu\text{L}$ , 71.3  $\mu\text{mol}$ , 1.2 equiv) in DMF (1.0 mL) to give **S60** (19.3 mg, 31.9  $\mu\text{mol}$ , 53%) as a white foam after purification by silica gel column chromatography (PE:EA = 3:1).  $[\alpha]_{\text{D}}^{25} = -92.40$  ( $c$  2.1,  $\text{CHCl}_3$ );  $^1\text{H}$  NMR (400 MHz, Chloroform- $d$ )  $\delta$  8.14–8.08 (m, 2H), 8.00–7.94 (m, 2H), 7.85–7.79 (m, 2H), 7.60 (t,  $J = 7.4$  Hz, 1H), 7.54–7.45 (m, 3H), 7.44–7.34 (m, 3H), 7.25–7.21 (m, 2H), 6.28 (d,  $J = 1.1$  Hz, 1H), 6.04–5.96 (m, 1H), 5.96–5.91 (m, 1H), 5.76 (s, 1H), 5.70–5.65 (m, 1H), 5.06–5.03 (m, 1H), 3.99 (d,  $J = 9.2$  Hz, 1H), 3.91 (dd,  $J = 9.4, 3.4$  Hz, 1H), 3.63 (s, 3H), 3.52 (s, 3H), 2.83 (dd,  $J = 14.2, 9.5$  Hz, 1H), 2.59 (dd,  $J = 14.2, 3.5$  Hz, 1H);  $^{13}\text{C}$  NMR (101 MHz, Chloroform- $d$ )  $\delta$  167.6, 166.5, 165.6, 165.5, 136.9, 133.62, 133.56, 133.2, 130.0, 129.9, 129.7, 129.3, 129.1, 128.8, 128.7, 128.5, 128.3, 128.2, 99.0, 72.2, 70.6, 69.8, 67.7, 67.3, 55.7, 51.9, 36.0; HRMS (ESI)  $m/z$  calcd for  $\text{C}_{33}\text{H}_{33}\text{O}_{11}$   $[\text{M}+\text{H}]^+$  605.2017, found 605.2034.

**Methyl [7,8-di-deoxy-1,2,3,4-di-*O*-isopropylidene-8-methylene-*D*-glycero- $\alpha$ -*D*-nongalactopyranosyluronate] (S61)**

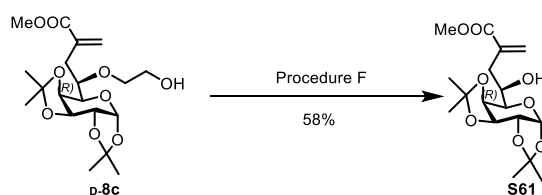

Following the general procedure F, **d-8c** (30.3 mg, 75.3  $\mu\text{mol}$ , 1.0 equiv) was treated with TEMPO (2.4 mg, 15.1  $\mu\text{mol}$ , 0.2 equiv) and  $\text{PhI}(\text{OAc})_2$  (48.5 mg, 150.6  $\mu\text{mol}$ , 2.0 equiv) in  $\text{DCM}/\text{H}_2\text{O}$  (3.3 mL,  $v/v = 10:1$ ) to give the acid (31.1 mg, 74.7  $\mu\text{mol}$ , 99%) as a colorless oil. The acid (31.1 mg, 74.7  $\mu\text{mol}$ , 1.0 equiv) was treated with DPPA (19  $\mu\text{L}$ , 89.6  $\mu\text{mol}$ , 1.2 equiv) and DIPEA (16  $\mu\text{L}$ , 89.6  $\mu\text{mol}$ , 1.2 equiv) in DMF (1.0 mL) to give **S61** (15.7 mg, 43.8  $\mu\text{mol}$ , 58%) as a white foam after purification by silica gel column chromatography (PE:EA = 3:1).  $[\alpha]_{\text{D}}^{25} = -43.07$  ( $c$  0.8,  $\text{CHCl}_3$ );  $^1\text{H}$  NMR (400 MHz, Chloroform- $d$ )  $\delta$  6.29 (d,  $J = 1.3$  Hz, 1H), 5.84 (s, 1H), 5.55 (d,  $J = 5.1$  Hz, 1H),

4.62 (dd,  $J = 8.0, 2.3$  Hz, 1H), 4.50 (dd,  $J = 8.0, 1.8$  Hz, 1H), 4.32 (dd,  $J = 5.1, 2.4$  Hz, 1H), 3.98–3.87 (m, 1H), 3.78 (s, 3H), 3.55 (dd,  $J = 8.4, 1.6$  Hz, 1H), 3.40 (s, 1H), 2.87 (dd,  $J = 14.5, 2.8$  Hz, 1H), 2.50 (dd,  $J = 14.4, 7.6$  Hz, 1H), 1.50 (s, 3H), 1.47 (s, 3H), 1.37 (s, 3H), 1.33 (s, 3H);  $^{13}\text{C}$  NMR (101 MHz, Chloroform- $d$ )  $\delta$  169.5, 136.8, 129.3, 109.3, 108.6, 96.6, 70.9, 70.8, 70.7, 69.7, 69.2, 52.5, 36.4, 26.13, 26.09, 25.1, 24.5; HRMS (ESI)  $m/z$  calcd for  $\text{C}_{17}\text{H}_{27}\text{O}_8$   $[\text{M}+\text{H}]^+$  359.1700, found 359.1707.

**Methyl [7,8-di-deoxy-1,2,3,4-di-*O*-isopropylidene-8-methylene-L-glycero- $\alpha$ -D-nongalactopyranosyluronate] (S62)**

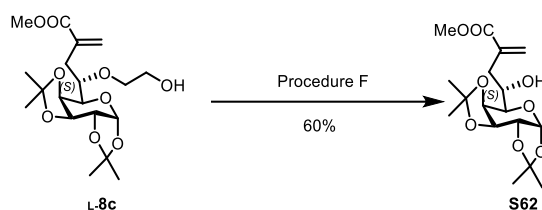

Following the general procedure F, L-8c (30.3 mg, 75.3  $\mu\text{mol}$ , 1.0 equiv) was treated with TEMPO (2.4 mg, 15.1  $\mu\text{mol}$ , 0.2 equiv) and  $\text{PhI}(\text{OAc})_2$  (48.5 mg, 150.6  $\mu\text{mol}$ , 2.0 equiv) in  $\text{DCM}/\text{H}_2\text{O}$  (3.3 mL,  $v/v = 10:1$ ) to give the acid (31.4 mg, 75.3  $\mu\text{mol}$ , 100%) as a colorless oil. The acid (31.4 mg, 75.3  $\mu\text{mol}$ , 1.0 equiv) was treated with DPPA (19  $\mu\text{L}$ , 90.4  $\mu\text{mol}$ , 1.2 equiv) and DIPEA (16  $\mu\text{L}$ , 90.4  $\mu\text{mol}$ , 1.2 equiv) in DMF (1.0 mL) to give S62 (16.3 mg, 45.5  $\mu\text{mol}$ , 60%) as a white foam after purification by silica gel column chromatography (PE:EA = 3:1).  $[\alpha]_{\text{D}}^{25} = -48.12$  ( $c$  0.7,  $\text{CHCl}_3$ );  $^1\text{H}$  NMR (400 MHz, Chloroform- $d$ )  $\delta$  6.28 (s, 1H), 5.81 (s, 1H), 5.64 (d,  $J = 5.0$  Hz, 1H), 4.65–4.52 (m, 1H), 4.40–4.31 (m, 2H), 4.22–4.14 (m, 1H), 3.76 (s, 3H), 3.61 (s, 1H), 2.64 (d,  $J = 6.5$  Hz, 2H), 1.49 (s, 6H), 1.34 (s, 3H), 1.33 (s, 3H);  $^{13}\text{C}$  NMR (101 MHz, Chloroform- $d$ )  $\delta$  167.8, 136.4, 128.7, 109.7, 108.7, 96.8, 73.4, 71.2, 70.5, 69.7, 67.9, 52.0, 35.8, 26.2, 25.9, 25.0, 24.2; HRMS (ESI)  $m/z$  calcd for  $\text{C}_{17}\text{H}_{27}\text{O}_8$   $[\text{M}+\text{H}]^+$  359.1700, found 359.1707.

**Methyl [methyl 6,7-di-deoxy-2,3-*O*-isopropylidene-7-methylene-D-glycero- $\alpha$ -D-octribofuranosyluronate] (S63)**

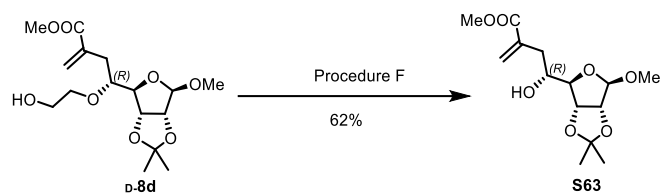

Following the general procedure F, **d-8d** (34.6 mg, 100.0  $\mu\text{mol}$ , 1.0 equiv) was treated with TEMPO (3.1 mg, 2.0  $\mu\text{mol}$ , 0.2 equiv) and  $\text{PhI}(\text{OAc})_2$  (64.4 mg, 200.0  $\mu\text{mol}$ , 2.0 equiv) in  $\text{DCM}/\text{H}_2\text{O}$  (3.3 mL,  $v/v = 10:1$ ) to give the acid (36.0 mg, 99.8  $\mu\text{mol}$ , 100%) as a colorless oil. The acid (36.0 mg, 99.8  $\mu\text{mol}$ , 1.0 equiv) was treated with DPPA (26  $\mu\text{L}$ , 119.8  $\mu\text{mol}$ , 1.2 equiv) and DIPEA (21  $\mu\text{L}$ , 119.8  $\mu\text{mol}$ , 1.2 equiv) in DMF (1.0 mL) to give **S63** (18.6 mg, 61.6  $\mu\text{mol}$ , 62%) as a white foam after purification by silica gel column chromatography (PE:EA = 3:1).  $[\alpha]_{\text{D}}^{25} = -33.76$  ( $c$  1.0,  $\text{CHCl}_3$ );  $^1\text{H}$  NMR (400 MHz, Chloroform- $d$ )  $\delta$  6.30 (d,  $J = 1.1$  Hz, 1H), 5.74 (s, 1H), 4.97 (s, 1H), 4.90 (d,  $J = 6.0$  Hz, 1H), 4.58 (d,  $J = 6.0$  Hz, 1H), 4.21 (d,  $J = 3.4$  Hz, 1H), 3.91–3.81 (m, 1H), 3.80–3.72 (m, 4H), 3.42 (s, 3H), 2.64 (dd,  $J = 14.2, 4.1$  Hz, 1H), 2.47 (dd,  $J = 14.1, 8.8$  Hz, 1H), 1.48 (s, 3H), 1.33 (s, 3H);  $^{13}\text{C}$  NMR (101 MHz, Chloroform- $d$ )  $\delta$  167.9, 136.7, 128.3, 112.3, 110.1, 90.9, 85.9, 80.3, 71.0, 55.8, 52.2, 36.0, 26.5, 24.8; HRMS (ESI)  $m/z$  calcd for  $\text{C}_{14}\text{H}_{22}\text{O}_7\text{Na}$   $[\text{M}+\text{Na}]^+$  325.1258, found 325.1267.

**Methyl [methyl 6,7-di-deoxy-2,3-*O*-isopropylidene-7-methylene-*L*-glycero- $\alpha$ -D-octribofuranosyluronate] (S64)**

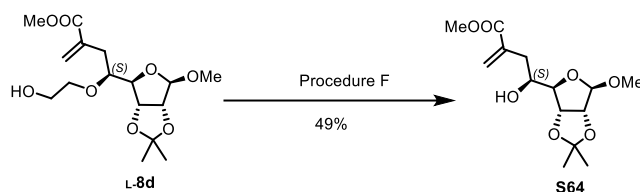

Following the general procedure F, **L-8c** (17.5 mg, 50.5  $\mu\text{mol}$ , 1.0 equiv) was treated with TEMPO (1.6 mg, 10.1  $\mu\text{mol}$ , 0.2 equiv) and  $\text{PhI}(\text{OAc})_2$  (32.6 mg, 101.2  $\mu\text{mol}$ , 2.0 equiv) in  $\text{DCM}/\text{H}_2\text{O}$  (3.3 mL,  $v/v = 10:1$ ) to give the acid (18.1 mg, 50.2  $\mu\text{mol}$ , 99%) as a colorless oil. The acid (18.1 mg, 50.2  $\mu\text{mol}$ , 1.0 equiv) was treated with DPPA (13  $\mu\text{L}$ , 60.2  $\mu\text{mol}$ , 1.2 equiv) and DIPEA (11  $\mu\text{L}$ , 60.2  $\mu\text{mol}$ , 1.2 equiv) in DMF (1.0 mL) to give **S64** (7.4 mg, 24.5  $\mu\text{mol}$ , 49%) as a white foam after purification by silica gel column chromatography (PE:EA = 3:1).  $[\alpha]_{\text{D}}^{25} = -23.08$  ( $c$  0.4,  $\text{CHCl}_3$ );  $^1\text{H}$  NMR (400

MHz, Chloroform-*d*)  $\delta$  6.27 (d,  $J = 1.3$  Hz, 1H), 5.73–5.65 (m, 1H), 4.98 (s, 1H), 4.82 (d,  $J = 5.9$  Hz, 1H), 4.59 (d,  $J = 6.0$  Hz, 1H), 4.36 (d,  $J = 2.6$  Hz, 1H), 3.84–3.69 (m, 4H), 3.49 (s, 3H), 3.43–3.30 (m, 1H), 2.64–2.41 (m, 2H), 1.48 (s, 3H), 1.31 (s, 3H);  $^{13}\text{C}$  NMR (101 MHz, Chloroform-*d*)  $\delta$  167.7, 137.0, 128.0, 112.2, 110.7, 90.0, 85.7, 82.7, 70.8, 56.1, 52.1, 37.1, 26.5, 24.8; HRMS (ESI)  $m/z$  calcd for  $\text{C}_{14}\text{H}_{22}\text{O}_7\text{Na}$   $[\text{M}+\text{Na}]^+$  325.1258, found 325.1268.

**Methyl [*p*-tolyl 6,7-di-deoxy-2,3-*O*-isopropylidene-7-methylene-*D*-glycero-1-thio- $\alpha$ -*D*-octribofuranosyluronate] (S65)**

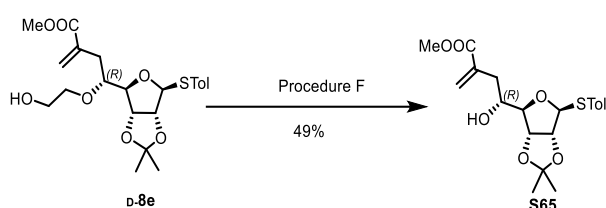

Following the general procedure F, **d-8e** (68.8 mg, 156.9  $\mu\text{mol}$ , 1.0 equiv) was treated with TEMPO (4.9 mg, 31.4  $\mu\text{mol}$ , 0.2 equiv) and  $\text{PhI}(\text{OAc})_2$  (101.1 mg, 313.8  $\mu\text{mol}$ , 2.0 equiv) in  $\text{DCM}/\text{H}_2\text{O}$  (3.3 mL,  $v/v = 10:1$ ) to give the acid (49.0 mg, 108.3  $\mu\text{mol}$ , 69%) as a colorless oil. The acid (49.0 mg, 108.3  $\mu\text{mol}$ , 1.0 equiv) was treated with DPPA (28  $\mu\text{L}$ , 130.0  $\mu\text{mol}$ , 1.2 equiv) and DIPEA (23  $\mu\text{L}$ , 130.0  $\mu\text{mol}$ , 1.2 equiv) in DMF (1.0 mL) to give **S65** (30.1 mg, 76.4  $\mu\text{mol}$ , 70%) as a white foam after purification by silica gel column chromatography (PE:EA = 3:1).  $[\alpha]_{\text{D}}^{25} = -133.72$  ( $c$  0.5,  $\text{CHCl}_3$ );  $^1\text{H}$  NMR (400 MHz, Chloroform-*d*)  $\delta$  7.38 (d,  $J = 8.1$  Hz, 2H), 7.13 (d,  $J = 7.9$  Hz, 2H), 6.27 (s, 1H), 5.68 (s, 1H), 5.50 (d,  $J = 2.4$  Hz, 1H), 4.93 (dd,  $J = 6.3, 1.7$  Hz, 1H), 4.70 (dd,  $J = 6.3, 2.4$  Hz, 1H), 4.08 (dd,  $J = 5.8, 1.7$  Hz, 1H), 4.06–3.98 (m, 1H), 3.77 (s, 3H), 3.29 (s, 1H), 2.68 (dd,  $J = 14.3, 3.5$  Hz, 1H), 2.46 (dd,  $J = 14.3, 8.2$  Hz, 1H), 2.33 (s, 3H), 1.51 (s, 3H), 1.35 (s, 3H);  $^{13}\text{C}$  NMR (101 MHz, Chloroform-*d*)  $\delta$  168.5, 137.8, 136.5, 131.8, 129.9, 129.8, 128.8, 113.5, 92.6, 89.9, 85.7, 81.2, 70.4, 52.2, 35.9, 26.9, 25.3, 21.1; HRMS (ESI)  $m/z$  calcd for  $\text{C}_{20}\text{H}_{30}\text{NO}_6\text{S}$   $[\text{M}+\text{HH}_4]^+$  412.1788, found 412.1791.

**Methyl [*p*-tolyl 6,7-di-deoxy-2,3-*O*-isopropylidene-7-methylene-*L*-glycero-1-thio-**

### $\alpha$ -D-octribofuranosyluronate] (S66)

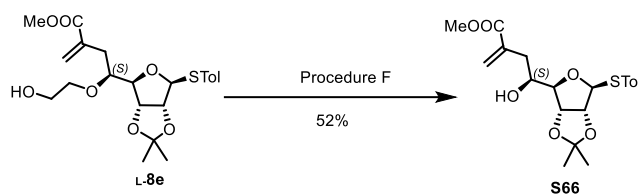

Following the general procedure F, **L-8e** (58.7 mg, 133.9  $\mu$ mol, 1.0 equiv) was treated with TEMPO (4.2 mg, 26.8  $\mu$ mol, 0.2 equiv) and  $\text{PhI}(\text{OAc})_2$  (86.3 mg, 267.8  $\mu$ mol, 2.0 equiv) in DCM/ $\text{H}_2\text{O}$  (3.3 mL,  $v/v = 10:1$ ) to give the acid (37.7 mg, 83.3  $\mu$ mol, 62%) as a colorless oil. The acid (37.7 mg, 83.3  $\mu$ mol, 1.0 equiv) was treated with DPPA (22  $\mu$ L, 99.9  $\mu$ mol, 1.2 equiv) and DIPEA (17  $\mu$ L, 99.9  $\mu$ mol, 1.2 equiv) in DMF (1.0 mL) to give **S66** (27.6 mg, 70.0  $\mu$ mol, 84%) as a white foam after purification by silica gel column chromatography (PE:EA = 3:1).  $[\alpha]_{\text{D}}^{25} = -71.49$  ( $c$  0.6,  $\text{CHCl}_3$ );  $^1\text{H NMR}$  (400 MHz, Chloroform- $d$ )  $\delta$  7.43 (d,  $J = 8.1$  Hz, 2H), 7.15 (d,  $J = 8.0$  Hz, 2H), 6.32–6.24 (m, 1H), 5.69 (s, 1H), 5.52 (d,  $J = 2.6$  Hz, 1H), 4.80 (dd,  $J = 6.2, 1.2$  Hz, 1H), 4.73 (dd,  $J = 6.1, 2.6$  Hz, 1H), 4.25–4.18 (m, 1H), 3.89 (dt,  $J = 8.0, 4.7$  Hz, 1H), 3.76 (s, 3H), 2.60–2.49 (m, 2H), 2.34 (s, 3H), 1.51 (s, 3H), 1.34 (s, 3H);  $^{13}\text{C NMR}$  (101 MHz, Chloroform- $d$ )  $\delta$  167.5, 138.1, 136.6, 132.0, 130.0, 129.6, 128.1, 113.4, 93.6, 89.7, 85.7, 82.8, 70.7, 52.0, 36.8, 27.0, 25.3, 21.1; HRMS (ESI)  $m/z$  calcd for  $\text{C}_{20}\text{H}_{30}\text{NO}_6\text{S}$   $[\text{M}+\text{HH}_4]^+$  412.1788, found 412.1794.

### Methyl {methyl [2,3,4-tri-*O*-benzoyl-7,8-di-deoxy-8-methylene-D-glycero- $\alpha$ -D-nonmannopyranosyluronate]}-(1 $\rightarrow$ 6)-2,3,4-tri-*O*-benzoyl- $\alpha$ -D-mannopyranoside (S67)

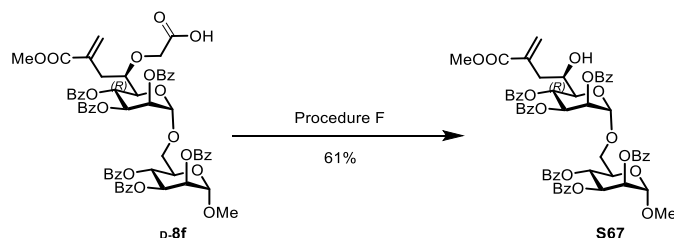

Following the general procedure F, **d-8f** (40.0 mg, 35.6  $\mu$ mol, 1.0 equiv) was treated with TEMPO (1.1 mg, 7.1  $\mu$ mol, 0.2 equiv) and  $\text{PhI}(\text{OAc})_2$  (22.9 mg, 71.2  $\mu$ mol, 2.0 equiv) in DCM/ $\text{H}_2\text{O}$  (3.3 mL,  $v/v = 10:1$ ) to give the acid (40.4 mg, 35.6  $\mu$ mol, 100%)

as a colorless oil. The acid (40.4 mg, 35.6  $\mu\text{mol}$ , 1.0 equiv) was treated with DPPA (9  $\mu\text{L}$ , 42.7  $\mu\text{mol}$ , 1.2 equiv) and DIPEA (8  $\mu\text{L}$ , 42.7  $\mu\text{mol}$ , 1.2 equiv) in DMF (1.0 mL) to give **S67** (23.3 mg, 21.6  $\mu\text{mol}$ , 61%) as a white foam after purification by silica gel column chromatography (PE:EA = 3:1).  $[\alpha]_{\text{D}}^{25} = -45.09$  ( $c$  1.2,  $\text{CHCl}_3$ );  $^1\text{H}$  NMR (400 MHz, Chloroform- $d$ )  $\delta$  8.18–8.13 (m, 2H), 8.08–8.04 (m, 2H), 8.04–7.95 (m, 4H), 7.90–7.78 (m, 4H), 7.60 (t,  $J = 7.4$  Hz, 1H), 7.56–7.36 (m, 11H), 7.36–7.31 (m, 2H), 7.31–7.26 (m, 4H), 6.22–6.17 (m, 1H), 6.00 (t,  $J = 10.0$  Hz, 1H), 5.96–5.92 (m, 2H), 5.90 (d,  $J = 10.0$  Hz, 1H), 5.74 (dd,  $J = 3.1, 1.7$  Hz, 1H), 5.71 (s, 1H), 5.62 (s, 1H), 5.18–5.14 (m, 1H), 5.06–5.02 (m, 1H), 4.42–4.35 (m, 1H), 4.29 (dd,  $J = 9.1, 2.5$  Hz, 1H), 4.13 (dd,  $J = 10.9, 5.8$  Hz, 1H), 3.90–3.83 (m, 1H), 3.81 (d,  $J = 11.0$  Hz, 1H), 3.64 (s, 3H), 3.59 (s, 3H), 2.86–2.70 (m, 1H), 2.50 (dd,  $J = 14.1, 10.4$  Hz, 1H);  $^{13}\text{C}$  NMR (101 MHz, Chloroform- $d$ )  $\delta$  168.1, 165.8, 165.68, 165.65, 165.5, 165.34, 165.26, 137.2, 133.5, 133.4, 133.1, 130.0, 129.9, 129.83, 129.81, 129.7, 129.4, 129.34, 129.26, 129.2, 129.1, 128.7, 128.50, 128.46, 128.3, 128.2, 98.7, 97.5, 72.9, 70.6, 70.5, 70.4, 70.3, 70.2, 69.5, 67.6, 67.2, 66.9, 55.6, 52.0, 34.2; HRMS (ESI)  $m/z$  calcd for  $\text{C}_{60}\text{H}_{55}\text{O}_{19}$   $[\text{M}+\text{H}]^+$  1079.3332, found 1079.3345.

**Methyl {methyl [2,3,4-tri-*O*-benzoyl-7,8-di-deoxy-8-methylene-*L*-glycero- $\alpha$ -*D*-nonmannopyranosyluronate]}-(1 $\rightarrow$ 6)-2,3,4-tri-*O*-benzoyl- $\alpha$ -*D*-mannopyranoside (**S68**)**

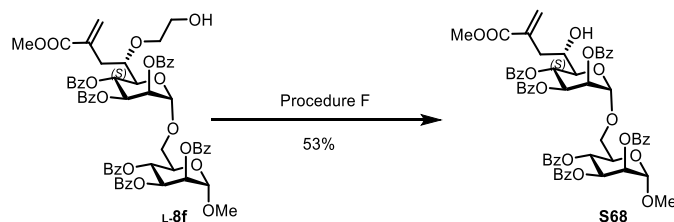

Following the general procedure F, **L-8f** (95.3 mg, 84.9  $\mu\text{mol}$ , 1.0 equiv) was treated with TEMPO (2.6 mg, 17.0  $\mu\text{mol}$ , 0.2 equiv) and  $\text{PhI}(\text{OAc})_2$  (54.7 mg, 169.8  $\mu\text{mol}$ , 2.0 equiv) in  $\text{DCM}/\text{H}_2\text{O}$  (3.3 mL,  $v/v = 10:1$ ) to give the acid (90.7 mg, 79.8  $\mu\text{mol}$ , 94%) as a colorless oil. The acid (90.7 mg, 79.8  $\mu\text{mol}$ , 1.0 equiv) was treated with DPPA (21  $\mu\text{L}$ , 95.6  $\mu\text{mol}$ , 1.2 equiv) and DIPEA (17  $\mu\text{L}$ , 95.6  $\mu\text{mol}$ , 1.2 equiv) in DMF (1.0 mL) to give **S68** (48.6 mg, 45.1  $\mu\text{mol}$ , 56%) as a white foam after purification by silica gel



column chromatography (PE:EA = 3:1).  $[\alpha]_{\text{D}}^{25} = -47.01$  ( $c$  2.0,  $\text{CHCl}_3$ );  $^1\text{H}$  NMR (400 MHz, Chloroform- $d$ )  $\delta$  8.11–8.05 (m, 4H), 8.02–7.93 (m, 4H), 7.88–7.80 (m, 4H), 7.59 (t,  $J = 7.5$  Hz, 1H), 7.57–7.52 (m, 2H), 7.51–7.43 (m, 6H), 7.43–7.36 (m, 4H), 7.36–7.31 (m, 2H), 7.29–7.26 (m, 3H), 6.06 (d,  $J = 1.1$  Hz, 1H), 6.01 (dd,  $J = 10.1, 3.2$  Hz, 1H), 5.98–5.93 (m, 2H), 5.93–5.88 (m, 1H), 5.76–5.73 (m, 1H), 5.70 (dd,  $J = 3.0, 1.6$  Hz, 1H), 5.52 (s, 1H), 5.20 (s, 1H), 5.10–5.04 (m, 1H), 4.40 (t,  $J = 7.4$  Hz, 1H), 4.16 (d,  $J = 9.6$  Hz, 1H), 4.07 (dd,  $J = 10.7, 7.0$  Hz, 1H), 3.87–3.80 (m, 1H), 3.75 (d,  $J = 8.8$  Hz, 1H), 3.66 (s, 3H), 3.50 (s, 3H), 2.85 (s, 1H), 2.68 (dd,  $J = 14.1, 10.1$  Hz, 1H), 2.46–2.32 (m, 1H);  $^{13}\text{C}$  NMR (101 MHz, Chloroform- $d$ )  $\delta$  167.3, 166.6, 165.7, 165.54, 165.53, 165.51, 165.4, 136.8, 133.6, 133.5, 133.2, 130.0, 129.92, 129.88, 129.8, 129.7, 129.29, 129.26, 129.2, 128.90, 128.88, 128.7, 128.64, 128.57, 128.5, 128.3, 127.9, 98.6, 97.4, 72.4, 70.5, 70.4, 70.0, 69.8, 69.4, 67.7, 67.5, 67.3, 66.7, 55.6, 51.7, 35.9; HRMS (ESI)  $m/z$  calcd for  $\text{C}_{60}\text{H}_{55}\text{O}_{19}$   $[\text{M}+\text{H}]^+$  1079.3332, found 1079.3345.

### **Mosher's method for the determination of absolute stereochemistry C6-OH on higher-carbon sugars**

#### **General Procedure G: Synthesis of *O*-mosher ester**

To a solution of alcohol (1.0 equiv) in dry pyridine were added DMAP (2.0 equiv) and (*R*)-(-)- $\alpha$ -methoxy- $\alpha$ -(trifluoromethyl)phenylacetyl chloride ((*R*)-MTPA-Cl) (2.0 equiv) at 0 °C. The mixture was warmed to room temperature and stirred for 1 h. After removal of solvent by rotary evaporation, the crude product was purified by flash silica gel column chromatography to give the (*S*)-*O*-Mosher ester. The same procedure was used with (*S*)-(+)- $\alpha$ -methoxy- $\alpha$ -(trifluoromethyl)phenylacetyl chloride ((*S*)-MTPA-Cl) in preparation of the analogous (*R*)-*O*-Mosher ester.

**Methyl {methyl 2,3,4-tri-*O*-benzoyl-7,8-di-deoxy-6-*O*-[(*S*)-(-)- $\alpha$ -methoxy- $\alpha$ -(trifluoromethyl)-phenylacetyl]-8-methylene-*L*-glycero- $\alpha$ -*D*-nonglucopyranosyl-uronate} (S69)**

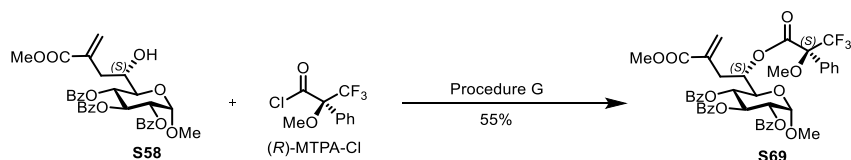

Following the general procedure G, **S58** (16.1 mg, 26.7  $\mu\text{mol}$ , 1.0 equiv) was treated with DMAP (6.5 mg, 53.4  $\mu\text{mol}$ , 2.0 equiv), (*R*)-MTPA-Cl (10  $\mu\text{L}$ , 53.4  $\mu\text{mol}$ , 2.0 equiv) in pyridine (0.5 mL) to give **S69** (*S*)-*O*-Mosher ester) (12.1 mg, 14.7  $\mu\text{mol}$ , 55%) as a white foam after purification by silica gel column chromatography (PE:EA = 4:1).

$[\alpha]_{\text{D}}^{25} = +28.78$  (*c* 0.7,  $\text{CHCl}_3$ );  $^1\text{H NMR}$  (400 MHz, Chloroform-*d*)  $\delta$  8.01–7.95 (m, 2H), 7.95–7.89 (m, 2H), 7.87–7.81 (m, 2H), 7.68–7.63 (m, 2H), 7.54–7.48 (m, 2H), 7.49–7.43 (m, 4H), 7.42–7.34 (m, 4H), 7.30 (t, *J* = 7.7 Hz, 2H), 6.10 (s, 1H), 6.05 (t, *J* = 9.9 Hz, 1H), 5.62 (t, *J* = 7.1 Hz, 1H), 5.48 (s, 1H), 5.32 (t, *J* = 9.8 Hz, 1H), 5.24 (d, *J* = 3.5 Hz, 1H), 5.06 (dd, *J* = 10.3, 3.6 Hz, 1H), 4.26–4.19 (m, 1H), 3.64 (s, 3H), 3.60 (s, 3H), 3.46 (s, 3H), 2.79 (d, *J* = 7.0 Hz, 2H);  $^{19}\text{F NMR}$  (376 MHz, Chloroform-*d*)  $\delta$  -71.02;  $^{13}\text{C NMR}$  (101 MHz, Chloroform-*d*)  $\delta$  166.5, 165.9, 165.8, 165.7, 165.0, 134.7, 133.4, 133.3, 133.1, 131.7, 130.0, 129.8, 129.7, 129.6, 129.3, 129.2, 129.0, 128.5, 128.4, 128.3, 128.1, 124.6, 97.2, 71.8, 70.7, 70.6, 69.6, 68.8, 56.1, 55.4, 52.0, 34.5; HRMS (ESI) *m/z* calcd for  $\text{C}_{43}\text{H}_{43}\text{F}_3\text{NO}_{13}$   $[\text{M}+\text{NH}_4]^+$  838.2681, found 838.2703.

**Methyl {methyl 2,3,4-tri-*O*-benzoyl-7,8-di-deoxy-6-*O*-[(*R*)-(-)- $\alpha$ -methoxy- $\alpha$ -(trifluoromethyl)-phenylacetyl]-8-methylene-*L*-glycero- $\alpha$ -D-nonglucopyranosyl-uronate} (**S70**)**

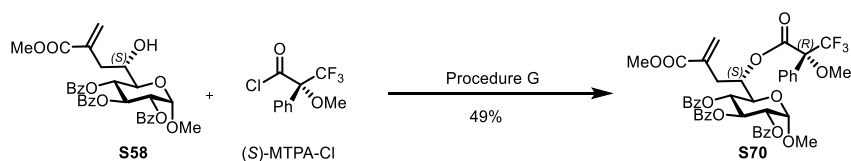

Following the general procedure G, **S58** (16.1 mg, 26.7  $\mu\text{mol}$ , 1.0 equiv) was treated with DMAP (6.5 mg, 53.4  $\mu\text{mol}$ , 2.0 equiv), (*R*)-MTPA-Cl (10  $\mu\text{L}$ , 53.4  $\mu\text{mol}$ , 2.0 equiv) in pyridine (0.5 mL) to give **S70** (*R*)-*O*-Mosher ester) (10.8 mg, 13.2  $\mu\text{mol}$ , 49%) as a white foam after purification by silica gel column chromatography (PE:EA = 4:1).

$[\alpha]_{\text{D}}^{25} = +34.46$  (*c* 0.6,  $\text{CHCl}_3$ );  $^1\text{H NMR}$  (400 MHz, Chloroform-*d*)  $\delta$  7.96 (d, *J* = 7.4 Hz, 2H), 7.91 (d, *J* = 7.4 Hz, 2H), 7.85 (d, *J* = 7.4 Hz, 2H), 7.70–7.63 (m, 2H), 7.54–7.49

(m, 2H), 7.48–7.43 (m, 4H), 7.40–7.35 (m, 4H), 7.32 (d,  $J = 7.8$  Hz, 2H), 6.19 (s, 1H), 6.04 (t,  $J = 9.8$  Hz, 1H), 5.62 (t,  $J = 6.9$  Hz, 1H), 5.59 (s, 1H), 5.35 (t,  $J = 9.7$  Hz, 1H), 5.21 (d,  $J = 3.4$  Hz, 1H), 5.00 (dd,  $J = 10.4, 3.5$  Hz, 1H), 4.20 (d,  $J = 10.1$  Hz, 1H), 3.64 (s, 3H), 3.60 (s, 3H), 3.45 (s, 3H), 2.88 (d,  $J = 6.8$  Hz, 2H);  $^{19}\text{F}$  NMR (376 MHz, Chloroform-*d*)  $\delta$  -71.21;  $^{13}\text{C}$  NMR (101 MHz, Chloroform-*d*)  $\delta$  166.5, 165.9, 165.8, 165.7, 165.0, 134.7, 133.4, 133.3, 133.1, 131.7, 130.0, 129.8, 129.7, 129.6, 129.3, 129.2, 129.0, 128.5, 128.4, 128.3, 128.1, 124.6, 121.8, 97.2, 71.8, 70.7, 70.6, 69.6, 68.8, 56.1, 55.4, 52.0, 34.5; HRMS (ESI)  $m/z$  calcd for  $\text{C}_{43}\text{H}_{43}\text{F}_3\text{NO}_{13}$   $[\text{M}+\text{NH}_4]^+$  838.2681, found 838.2692.

**Methyl {methyl 2,3,4-tri-*O*-benzoyl-7,8-di-deoxy-6-*O*-[(*S*)-(-)- $\alpha$ -methoxy- $\alpha$ -(trifluoromethyl)-phenylacetyl]-8-methylene-*D*-glycero- $\alpha$ -*D*-Nonmannopyranosyl-uronate} (S71)**

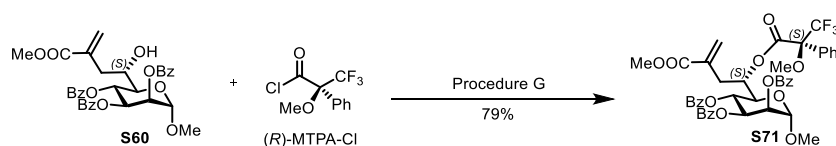

Following the general procedure G, **S60** (16.1 mg, 26.7  $\mu\text{mol}$ , 1.0 equiv) was treated with DMAP (6.5 mg, 53.4  $\mu\text{mol}$ , 2.0 equiv), (*R*)-MTPA-Cl (10  $\mu\text{L}$ , 53.4  $\mu\text{mol}$ , 2.0 equiv) in pyridine (0.5 mL) to give **S71** ((*S*)-*O*-Mosher ester) (17.3 mg, 21.1  $\mu\text{mol}$ , 79%) as a white foam after purification by silica gel column chromatography (PE:EA = 4:1).

$[\alpha]_{\text{D}}^{25} = -71.23$  ( $c$  1.7,  $\text{CHCl}_3$ );  $^1\text{H}$  NMR (400 MHz, Chloroform-*d*)  $\delta$  8.05 (d,  $J = 7.2$  Hz, 2H), 7.96 (d,  $J = 8.4$  Hz, 2H), 7.86 (d,  $J = 7.2$  Hz, 2H), 7.60–7.54 (m, 3H), 7.51 (t,  $J = 7.5$  Hz, 1H), 7.46–7.33 (m, 8H), 7.29 (d,  $J = 7.9$  Hz, 2H), 6.00 (s, 1H), 5.94 (t,  $J = 10.1$  Hz, 1H), 5.80 (dd,  $J = 10.0, 3.3$  Hz, 1H), 5.74 (t,  $J = 6.5$  Hz, 1H), 5.65 (dd,  $J = 3.2, 1.7$  Hz, 1H), 5.39 (s, 1H), 5.07 (s, 1H), 4.31 (d,  $J = 10.2$  Hz, 1H), 3.66 (s, 3H), 3.55 (s, 3H), 3.53 (s, 3H), 2.82 (d,  $J = 6.8$  Hz, 2H);  $^{19}\text{F}$  NMR (376 MHz, Chloroform-*d*)  $\delta$  -72.04;  $^{13}\text{C}$  NMR (101 MHz, Chloroform-*d*)  $\delta$  166.5, 166.0, 165.8, 165.5, 165.2, 134.7, 133.6, 133.3, 133.2, 131.6, 129.9, 129.8, 129.7, 129.5, 129.4, 129.2, 129.1, 128.5, 128.4, 128.3, 128.2, 128.0, 121.7, 99.0, 70.7, 70.6, 70.4, 66.4, 56.0, 55.6, 52.0, 34.6; HRMS (ESI)  $m/z$  calcd for  $\text{C}_{43}\text{H}_{43}\text{F}_3\text{NO}_{13}$   $[\text{M}+\text{NH}_4]^+$  838.2681, found 838.2704.

**Methyl {methyl 2,3,4-tri-*O*-benzoyl-7,8-di-deoxy-6-*O*-[(*R*)-(-)- $\alpha$ -methoxy- $\alpha$ -(trifluoromethyl)-phenylacetyl]-8-methylene-*D*-glycero- $\alpha$ -*D*-nonmannopyranosyl-uronate} (S72)**

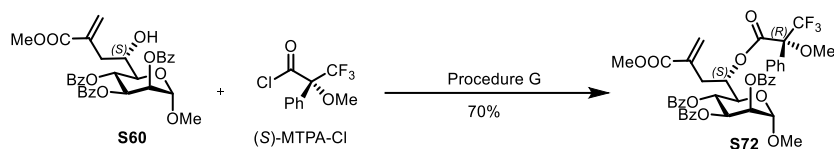

Following the general procedure G, **S60** (16.1 mg, 26.7  $\mu\text{mol}$ , 1.0 equiv) was treated with DMAP (6.5 mg, 53.4  $\mu\text{mol}$ , 2.0 equiv), (*S*)-MTPA-Cl (10  $\mu\text{L}$ , 53.4  $\mu\text{mol}$ , 2.0 equiv) in pyridine (0.5 mL) to give **S72** (*R*)-*O*-Mosher ester) (15.4 mg, 18.8  $\mu\text{mol}$ , 70%) as a white foam after purification by silica gel column chromatography (PE:EA = 4:1).

$[\alpha]_D^{25} = -56.00$  (*c* 0.7,  $\text{CHCl}_3$ );  $^1\text{H NMR}$  (400 MHz, Chloroform-*d*)  $\delta$  8.05 (d,  $J = 7.4$  Hz, 2H), 7.92 (d,  $J = 7.4$  Hz, 2H), 7.83 (d,  $J = 7.4$  Hz, 2H), 7.63–7.55 (m, 3H), 7.51 (t,  $J = 7.4$  Hz, 1H), 7.44–7.34 (m, 8H), 7.31–7.26 (m, 2H), 6.13 (s, 1H), 5.89 (t,  $J = 10.0$  Hz, 1H), 5.83–5.77 (m, 1H), 5.73 (t,  $J = 6.6$  Hz, 1H), 5.66–5.62 (m, 1H), 5.53 (s, 1H), 5.06 (s, 1H), 4.30 (d,  $J = 10.1$  Hz, 1H), 3.65 (s, 3H), 3.54 (s, 3H), 3.53 (s, 3H), 2.93–2.88 (m, 2H);  $^{19}\text{F NMR}$  (376 MHz, Chloroform-*d*)  $\delta$  -70.99;  $^{13}\text{C NMR}$  (101 MHz, Chloroform-*d*)  $\delta$  166.6, 165.9, 165.8, 165.5, 165.1, 135.1, 133.5, 133.3, 133.2, 131.7, 129.9, 129.8, 129.7, 129.6, 129.3, 129.2, 129.1, 129.0, 128.5, 128.4, 128.3, 128.1, 99.0, 71.1, 70.5, 70.5, 66.4, 56.0, 55.3, 34.5; HRMS (ESI)  $m/z$  calcd for  $\text{C}_{43}\text{H}_{43}\text{F}_3\text{NO}_{13}$   $[\text{M}+\text{NH}_4]^+$  838.2681, found 838.2694.

**Methyl {7,8-di-deoxy-6-*O*-[(*S*)-(-)- $\alpha$ -methoxy- $\alpha$ -(trifluoromethyl)-phenylacetyl]-1,2,3,4-di-*O*-isopropylidene-8-methylene-*D*-glycero- $\alpha$ -*D*-nongalactopyranosyl-uronate} (S73)**

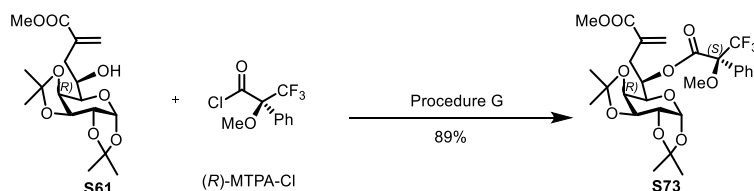

Following the general procedure G, **S61** (9.6 mg, 26.7  $\mu\text{mol}$ , 1.0 equiv) was treated with DMAP (6.5 mg, 53.4  $\mu\text{mol}$ , 2.0 equiv), (*R*)-MTPA-Cl (10  $\mu\text{L}$ , 53.4  $\mu\text{mol}$ , 2.0 equiv) in pyridine (0.5 mL) to give **S73** (*S*)-*O*-Mosher ester) (13.7 mg, 23.8  $\mu\text{mol}$ , 89%) as a

white foam after purification by silica gel column chromatography (PE:EA = 5:1).  $[\alpha]_{\text{D}}^{25} = -53.87$  ( $c$  0.7,  $\text{CHCl}_3$ );  $^1\text{H}$  NMR (400 MHz, Chloroform- $d$ )  $\delta$  7.60–7.50 (m, 2H), 7.45–7.31 (m, 3H), 6.22 (s, 1H), 5.67 (s, 1H), 5.59–5.50 (m, 2H), 4.52 (dd,  $J = 7.9, 2.4$  Hz, 1H), 4.30 (dd,  $J = 5.0, 2.5$  Hz, 1H), 4.00 (dd,  $J = 7.6, 1.5$  Hz, 1H), 3.79 (d,  $J = 10.1$  Hz, 1H), 3.75 (s, 3H), 3.49 (s, 3H), 3.18 (dd,  $J = 14.9, 2.5$  Hz, 1H), 2.58 (dd,  $J = 14.9, 8.4$  Hz, 1H), 1.48 (s, 3H), 1.45 (s, 3H), 1.31 (s, 3H), 1.28 (s, 3H);  $^{19}\text{F}$  NMR (376 MHz, Chloroform- $d$ )  $\delta$  -71.96;  $^{13}\text{C}$  NMR (101 MHz, Chloroform- $d$ )  $\delta$  167.0, 165.2, 135.9, 131.8, 129.6, 128.5, 128.2, 127.9, 109.5, 108.7, 96.4, 72.7, 70.7, 70.4, 70.1, 68.1, 55.3, 52.0, 33.9, 26.0, 24.8, 24.6; HRMS (ESI)  $m/z$  calcd for  $\text{C}_{27}\text{H}_{37}\text{F}_3\text{NO}_{10}$   $[\text{M}+\text{NH}_4]^+$  592.2364, found 592.2379.

**Methyl {7,8-di-deoxy-6-*O*-[(*R*)-(-)- $\alpha$ -methoxy- $\alpha$ -(trifluoromethyl)-phenylacetyl]-1,2,3,4-di-*O*-isopropylidene-8-methylene-L-glycero- $\alpha$ -D-Nongalactopyranosyluronate} (S74)**

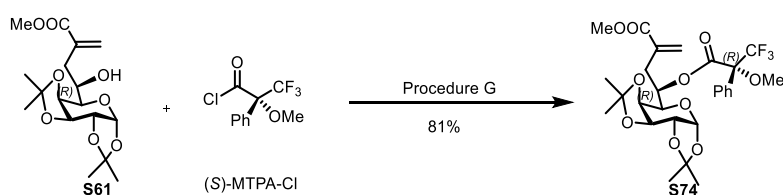

Following the general procedure H, **S61** (9.6 mg, 26.7  $\mu\text{mol}$ , 1.0 equiv) was treated with DMAP (6.5 mg, 53.4  $\mu\text{mol}$ , 2.0 equiv), (*S*)-MTPA-Cl (10  $\mu\text{L}$ , 53.4  $\mu\text{mol}$ , 2.0 equiv) in pyridine (0.5 mL) to give **S74** ((*R*)-*O*-Mosher ester) (12.4 mg, 21.6  $\mu\text{mol}$ , 81%) as a white foam after purification by silica gel column chromatography (PE:EA = 5:1).  $[\alpha]_{\text{D}}^{25} = -39.87$  ( $c$  0.8,  $\text{CHCl}_3$ );  $^1\text{H}$  NMR (400 MHz, Chloroform- $d$ )  $\delta$  7.54 (d,  $J = 7.0$  Hz, 2H), 7.42–7.33 (m, 3H), 6.13 (s, 1H), 5.59–5.53 (m, 2H), 5.48 (td,  $J = 8.3, 3.0$  Hz, 1H), 4.60 (dd,  $J = 7.8, 2.1$  Hz, 1H), 4.33 (dd,  $J = 4.9, 2.3$  Hz, 1H), 4.23 (d,  $J = 9.2$  Hz, 1H), 3.88 (d,  $J = 8.0$  Hz, 1H), 3.74 (s, 3H), 3.53 (s, 3H), 3.23–3.13 (m, 1H), 2.54 (dd,  $J = 14.8, 8.6$  Hz, 1H), 1.48 (s, 6H), 1.33 (s, 3H), 1.32 (s, 3H);  $^{19}\text{F}$  NMR (376 MHz, Chloroform- $d$ )  $\delta$  -71.84;  $^{13}\text{C}$  NMR (101 MHz, Chloroform- $d$ )  $\delta$  167.0, 165.6, 135.6, 132.2, 129.5, 128.6, 128.2, 127.9, 109.6, 108.7, 96.5, 73.1, 70.8, 70.4, 70.3, 68.0, 55.2, 51.9, 33.7, 26.0, 25.9, 24.9, 24.6; HRMS (ESI)  $m/z$  calcd for  $\text{C}_{27}\text{H}_{37}\text{F}_3\text{NO}_{10}$   $[\text{M}+\text{NH}_4]^+$

592.2364, found 592.2372.

**Methyl {*p*-tolyl 6,7-di-deoxy-5-*O*-[(*S*)-(-)- $\alpha$ -methoxy- $\alpha$ -(trifluoromethyl)-phenyl-acetyl]-2,3-*O*-isopropylidene-7-methylene-*D*-glycero-1-thio- $\alpha$ -*D*-Octribofuranosyl-uronate} (**S75**)**

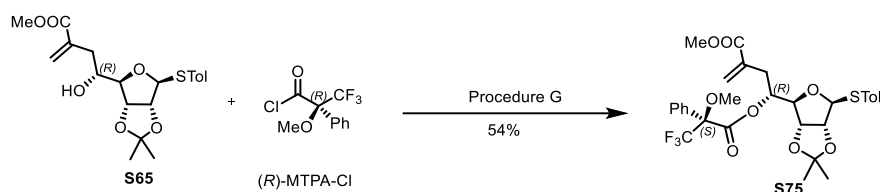

Following the general procedure G, **S65** (10.5 mg, 26.7  $\mu$ mol, 1.0 equiv) was treated with DMAP (6.5 mg, 53.4  $\mu$ mol, 2.0 equiv), (*R*)-MTPA-Cl (10  $\mu$ L, 53.4  $\mu$ mol, 2.0 equiv) in pyridine (0.5 mL) to give **S75** ((*S*)-*O*-Mosher ester) (8.8 mg, 14.4  $\mu$ mol, 54%) as a white foam after purification by silica gel column chromatography (PE:EA = 5:1).

$[\alpha]_D^{25} = -46.54$  (*c* 0.4, CHCl<sub>3</sub>); <sup>1</sup>H NMR (400 MHz, Chloroform-*d*)  $\delta$  7.57–7.49 (m, 2H), 7.42–7.36 (m, 5H), 7.11 (d, *J* = 8.0 Hz, 2H), 6.23 (s, 1H), 5.75–5.65 (m, 1H), 5.61 (s, 1H), 5.33 (d, *J* = 2.5 Hz, 1H), 4.61–4.53 (m, 2H), 4.08 (dd, *J* = 6.7, 1.9 Hz, 1H), 3.74 (s, 3H), 3.50 (s, 3H), 2.93 (dd, *J* = 14.7, 3.2 Hz, 1H), 2.59 (dd, *J* = 14.8, 9.4 Hz, 1H), 2.32 (s, 3H), 1.47 (s, 3H), 1.27 (s, 3H); <sup>19</sup>F NMR (376 MHz, Chloroform-*d*)  $\delta$  -71.20; <sup>13</sup>C NMR (101 MHz, Chloroform-*d*)  $\delta$  166.7, 166.0, 137.7, 135.1, 131.7, 130.1, 129.9, 129.6, 129.0, 128.4, 127.7, 114.5, 92.1, 86.3, 84.9, 80.9, 73.3, 55.6, 52.1, 34.1, 27.0, 25.2, 22.7, 21.1; HRMS (ESI) *m/z* calcd for C<sub>30</sub>H<sub>37</sub>F<sub>3</sub>NO<sub>8</sub>S [M+NH<sub>4</sub>]<sup>+</sup> 628.2186, found 628.2189.

**Methyl {*p*-tolyl 6,7-di-deoxy-5-*O*-[(*R*)-(-)- $\alpha$ -methoxy- $\alpha$ -(trifluoromethyl)-phenyl-acetyl]-2,3-*O*-isopropylidene-7-methylene-*L*-glycero-1-thio- $\alpha$ -*D*-octribofuranosyl-uronate} (**S76**)**

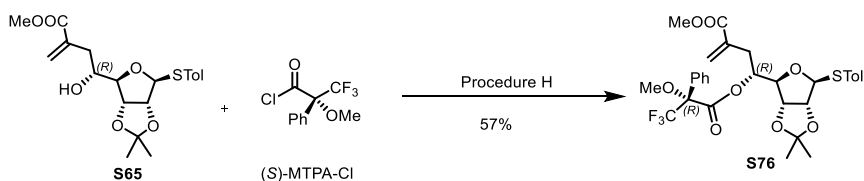

Following the general procedure G, **S65** (16.1 mg, 26.7  $\mu$ mol, 1.0 equiv) was treated

with DMAP (6.5 mg, 53.4  $\mu\text{mol}$ , 2.0 equiv), (*S*)-MTPA-Cl (10  $\mu\text{L}$ , 53.4  $\mu\text{mol}$ , 2.0 equiv) in pyridine (0.5 mL) to give **S76** (*(R)*-*O*-Mosher ester) (9.3 mg, 15.2  $\mu\text{mol}$ , 57%) as a white foam after purification by silica gel column chromatography (PE:EA = 5:1).

$[\alpha]_{\text{D}}^{25} = -48.98$  (*c* 0.5,  $\text{CHCl}_3$ );  $^1\text{H}$  NMR (400 MHz, Chloroform-*d*)  $\delta$  7.61–7.55 (m, 2H), 7.44–7.37 (m, 5H), 7.12 (d,  $J = 7.9$  Hz, 2H), 6.11 (s, 1H), 5.76–5.69 (m, 1H), 5.49 (s, 1H), 5.33 (d,  $J = 3.8$  Hz, 1H), 4.68 (dd,  $J = 6.7, 3.1$  Hz, 1H), 4.59 (dd,  $J = 6.7, 3.8$  Hz, 1H), 4.14 (dd,  $J = 6.2, 3.1$  Hz, 1H), 3.74 (s, 3H), 3.56 (s, 3H), 2.89 (dd,  $J = 14.4, 3.2$  Hz, 1H), 2.51 (dd,  $J = 14.5, 9.8$  Hz, 1H), 2.33 (s, 3H), 1.51 (s, 3H), 1.32 (s, 3H);  $^{19}\text{F}$  NMR (376 MHz, Chloroform-*d*)  $\delta$  -70.93;  $^{13}\text{C}$  NMR (101 MHz, Chloroform-*d*)  $\delta$  166.6, 166.0, 137.8, 134.7, 132.2, 131.9, 130.1, 129.9, 129.6, 129.3, 128.4, 127.5, 114.8, 91.9, 86.2, 84.8, 80.8, 73.3, 55.6, 52.0, 34.3, 27.1, 25.3, 22.7, 21.1; HRMS (ESI)  $m/z$  calcd for  $\text{C}_{30}\text{H}_{37}\text{F}_3\text{NO}_8\text{S}$   $[\text{M}+\text{NH}_4]^+$  628.2186, found 628.2176.

## Synthesis of shewanellose-type building block

### *tert*-Butyldimethylsilyl 2-azido-3,4,6-tri-*O*-acetyl-2-deoxy- $\beta$ -D-galactopyranoside (**S77**)

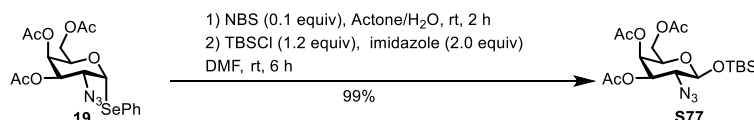

To a solution of **19** (4.39 g, 9.33 mmol, 1.0 equiv) in acetone/ $\text{H}_2\text{O}$  (20.0 mL,  $v/v = 9:1$ ) was added *N*-bromosuccinimide (NBS) (2.51 g, 14.00 mmol, 1.5 equiv) in ice bath under an argon atmosphere. After stirring for 2 h at room temperature, the resultant

mixture was diluted with DCM, and washed with Na<sub>2</sub>S<sub>2</sub>O<sub>3</sub> solution, NaHCO<sub>3</sub> solution and brine. The organic layer was collected, dried over Na<sub>2</sub>SO<sub>4</sub>, filtered off the solid and concentrated *in vacuo*. The crude product obtained above was dissolved in dry DMF (20.0 mL), TBSCl (1.69 g, 11.21 mmol, 1.2 equiv) and imidazole (1.27 mg, 18.67 mmol, 2.0 equiv) were added at room temperature under an argon atmosphere. The resultant solution was stirred for 6 h at room temperature and quenched with H<sub>2</sub>O. The resultant mixture was extracted with DCM, and the organic layer was washed with 1M HCl solution, saturated NaHCO<sub>3</sub> solution and brine. The organic layer was collected, dried over Na<sub>2</sub>SO<sub>4</sub>, filtered off the solid and concentrated *in vacuo*. The resulting residue was purified by silica gel column chromatography (PE:EA = 9:1) to afford **S77**<sup>[17]</sup> (4.11 g, 9.23 mmol, 99%) as a white foam.

***tert*-Butyldimethylsilyl 2-azido-2-deoxy-6-*O*-(*p*-toluenesulfonyl)-1- $\beta$ -D-galactopyranoside (**S78**)**

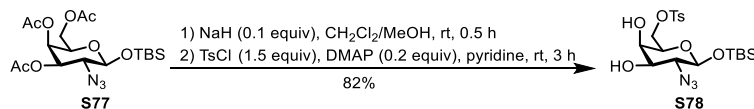

To a solution of **S77** (7.71 g, 17.30 mmol, 1.0 equiv) in dry MeOH (20.0 mL) was added 60% dispersion of NaH in mineral oil (69.2 mg, 1.73 mmol, 0.1 equiv) in ice bath under an argon atmosphere. After stirring for 2 h at room temperature, the reaction was neutralized with seralite acidic resin, which was further removed by filtration. The mixture was evaporated to dryness. The crude product obtained above was dissolved in dry pyridine (40.0 mL), tosyl chloride (TsCl) (3.63 g, 19.03 mmol, 1.1 equiv) and DMAP (211.4 mg, 1.73 mmol, 0.1 equiv) were added at room temperature under an argon atmosphere. The resultant solution was stirred for 1 h at room temperature and quenched with H<sub>2</sub>O. The resultant mixture was extracted with DCM, and the organic layer was washed with 1M HCl solution, saturated NaHCO<sub>3</sub> solution and brine. The organic layer was collected, dried over Na<sub>2</sub>SO<sub>4</sub>, filtered off the solid and concentrated *in vacuo*. The resulting residue was purified by silica gel column chromatography (PE:EA = 1.5:1) to afford **S78** (6.67 g, 14.11 mmol, 82%) as a colorless oil.  $[\alpha]_D^{25} = +10.35$  (*c* 2.9, CHCl<sub>3</sub>); <sup>1</sup>H NMR (400 MHz, Chloroform-*d*)  $\delta$  7.70–7.64 (m, 2H), 7.26–



7.21 (m, 2H), 4.36 (d,  $J = 7.2$  Hz, 1H), 4.15 (dd,  $J = 10.4, 5.3$  Hz, 1H), 4.01 (dd,  $J = 10.4, 7.0$  Hz, 1H), 3.78 (s, 1H), 3.58 (t,  $J = 6.2$  Hz, 1H), 3.36–3.27 (m, 2H), 3.09 (s, 1H), 2.94–2.87 (m, 1H), 2.33 (s, 3H), 0.79 (s, 9H), 0.02 (s, 3H), 0.00 (s, 3H);  $^{13}\text{C}$  NMR (101 MHz, Chloroform-*d*)  $\delta$  145.3, 132.3, 130.0, 128.0, 97.3, 72.3, 71.3, 68.2, 67.5, 66.0, 25.6, 21.7, 17.9, -4.3, -5.3; HRMS (ESI)  $m/z$  calcd for  $\text{C}_{19}\text{H}_{35}\text{N}_4\text{O}_7\text{SiS}$  [ $\text{M}+\text{HH}_4$ ] $^+$  491.1990, found 491.1990.

***tert*-Butyldimethylsilyl 2-azido-2-deoxy-6-deoxy-6-iodo-1- $\beta$ -D-galactopyranoside (S79)**

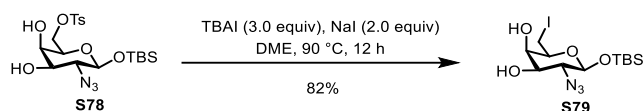

To a solution of **S78** (6.67 g, 14.08 mmol, 1.0 equiv) in 1,2-dimethoxyethane (DME) (50.0 mL) were added tetrabutylammonium iodide (TBAI) (15.61 g, 42.24 mmol, 3.0 equiv) and NaI (4.23 g, 28.16 mmol, 2.0 equiv) in ice bath under an argon atmosphere. The resultant solution was stirred for 12 h at 90 °C. The resultant mixture was diluted with DCM, and washed with  $\text{Na}_2\text{S}_2\text{O}_3$  solution and brine. The organic layer was collected, dried over  $\text{Na}_2\text{SO}_4$ , filtered off the solid and concentrated *in vacuo*. The resulting residue was purified by silica gel column chromatography (PE:EA = 1.5:1) to afford **S79** (4.97 g, 11.58 mmol, 82%) as a yellow oil.  $[\alpha]_{\text{D}}^{25} = +65.68$  (*c* 2.0,  $\text{CHCl}_3$ );  $^1\text{H}$  NMR (400 MHz, Chloroform-*d*)  $\delta$  4.49 (d,  $J = 7.3$  Hz, 1H), 4.05 (s, 1H), 3.60 (t,  $J = 6.9$  Hz, 1H), 3.51–3.39 (m, 3H), 3.37–3.30 (m, 2H), 3.22 (s, 1H), 0.94 (s, 9H), 0.21 (s, 3H), 0.19 (s, 3H);  $^{13}\text{C}$  NMR (101 MHz, Chloroform-*d*)  $\delta$  97.5, 75.7, 71.8, 69.0, 66.0, 25.7, 18.0, 2.0, -3.8, -5.2.; HRMS (ESI)  $m/z$  calcd for  $\text{C}_{13}\text{H}_{25}\text{IN}_3\text{O}_6\text{Si}$  [ $\text{M}+\text{HCOO}$ ] $^-$  474.0563, found 474.0565.

***tert*-Butyldimethylsilyl 2-azido-2-deoxy-1- $\beta$ -D-fucopyranoside (S80)**

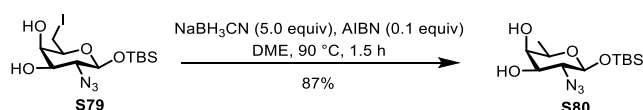

To a solution of **S79** (4.97 g, 11.62 mmol, 1.0 equiv) in DME (40.0.0 mL) were added  $\text{NaCNBH}_3$  (3.64 g, 57.92 mmol, 5.0 equiv) and 2,2'-azobis(2-methylpropionitrile)

(AIBN) (190.5 mg, 1.16 mmol, 0.1 equiv) in ice bath under an argon atmosphere. The resultant solution was stirred for 1.5 h at 90 °C. The resultant mixture was diluted with DCM, and washed with brine. The organic layer was collected, dried over Na<sub>2</sub>SO<sub>4</sub>, filtered off the solid and concentrated *in vacuo*. The resulting residue was purified by silica gel column chromatography (PE:EA = 1.5:1) to afford **S80** (3.06 g, 10.09 mmol, 87%) as a colorless oil.  $[\alpha]_D^{25} = +11.56$  (*c* 1.4, CHCl<sub>3</sub>); <sup>1</sup>H NMR (400 MHz, Chloroform-*d*) δ 4.46 (d, *J* = 7.5 Hz, 1H), 3.68 (d, *J* = 4.3 Hz, 1H), 3.59–3.51 (m, 1H), 3.42–3.35 (m, 2H), 3.17 (s, 1H), 2.78 (d, *J* = 5.6 Hz, 1H), 1.31 (d, *J* = 6.5 Hz, 3H), 0.92 (s, 9H), 0.14 (s, 3H), 0.14 (s, 3H); <sup>13</sup>C NMR (101 MHz, Chloroform-*d*) δ 97.3, 72.3, 70.9, 70.5, 66.5, 25.6, 18.0, 16.3, -4.3, -5.2; HRMS (ESI) *m/z* calcd for C<sub>13</sub>H<sub>26</sub>N<sub>3</sub>O<sub>6</sub>Si [M+HCOO]<sup>-</sup> 348.1596, found 348.1591.

***tert*-Butyldimethylsilyl 2-azido-2-deoxy-3-*O*-(*tert*-butyldimethylsilyl)-1-β-D-fucopyranoside (S81)**

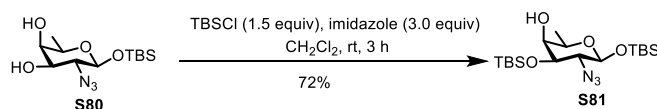

To a solution of **S80** (3.06 g, 10.08 mmol, 1.0 equiv) in DCM (30.0 mL) were added TBSCl (1.83 g, 20.18 mmol, 2.0 equiv) and imidazole (1.38 g, 12.10 mmol, 1.2 equiv) in ice bath under an argon atmosphere. The resultant solution was stirred for 3 h at room temperature and quenched with saturated NaHCO<sub>3</sub> solution. The resultant mixture was extracted with DCM, and the organic layer was washed with brine. The organic layer was collected, dried over Na<sub>2</sub>SO<sub>4</sub>, filtered off the solid and concentrated *in vacuo*. The resulting residue was purified by silica gel column chromatography (PE:EA = 25:1) to afford **S81** (3.03 g, 7.26 mmol, 72%) as a colorless oil.  $[\alpha]_D^{25} = +18.26$  (*c* 2.2, CHCl<sub>3</sub>); <sup>1</sup>H NMR (400 MHz, Chloroform-*d*) δ 4.41 (d, *J* = 7.6 Hz, 1H), 3.55–3.45 (m, 2H), 3.41 (dd, *J* = 9.7, 3.3 Hz, 1H), 3.33 (dd, *J* = 9.6, 7.7 Hz, 1H), 2.50 (s, 1H), 1.33 (d, *J* = 6.5 Hz, 3H), 0.92 (s, 9H), 0.91 (s, 9H), 0.16 (s, 3H), 0.14 (s, 3H), 0.13 (s, 3H), 0.11 (s, 3H); <sup>13</sup>C NMR (101 MHz, Chloroform-*d*) δ 97.2, 73.5, 71.5, 70.1, 67.0, 25.8, 18.1, 16.5, -4.1, -4.5, -4.7, -5.2; HRMS (ESI) *m/z* calcd for C<sub>19</sub>H<sub>40</sub>N<sub>3</sub>O<sub>6</sub>Si<sub>2</sub> [M+HCOO]<sup>-</sup> 462.2461, found 462.2467.

***tert*-Butyldimethylsilyl 4-*O*-allyl-2-azido-2-deoxy-3-*O*-(*tert*-butyldimethylsilyl)-1- $\beta$ -D-fucopyranoside (**S82**)**

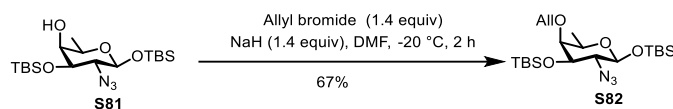

To a solution of **S81** (2.76 g, 6.00 mmol, 1.0 equiv) in dry DMF (30.0 mL) were added AllBr (2.2 mL, 30.00 mmol, 5.0 equiv) and 60% dispersion of NaH in mineral oil (312.3 mg, 7.80 mmol, 1.3 equiv) at -20 °C under an argon atmosphere. The resultant solution was stirred for 2 h at -20 °C and quenched with NH<sub>4</sub>Cl solution. The resultant mixture was extracted with DCM, and the organic layer was washed with brine. The organic layer was collected, dried over Na<sub>2</sub>SO<sub>4</sub>, filtered off the solid and concentrated *in vacuo*. The resulting residue was purified by silica gel column chromatography (PE:EA = 70:1) to afford **S82** (1.83 g, 4.00 mmol, 67%) as a colorless oil.  $[\alpha]_D^{25} = +2.58$  (*c* 0.7, CHCl<sub>3</sub>); <sup>1</sup>H NMR (400 MHz, Chloroform-*d*)  $\delta$  6.04–5.81 (m, 1H), 5.27–5.20 (m, 1H), 5.18–5.12 (m, 1H), 4.50–4.40 (m, 1H), 4.38 (d, *J* = 7.5 Hz, 1H), 4.12 (dd, *J* = 12.7, 6.9 Hz, 1H), 3.55–3.35 (m, 3H), 3.24 (d, *J* = 2.6 Hz, 1H), 1.24 (d, *J* = 6.4 Hz, 3H), 0.94 (s, 9H), 0.92 (s, 9H), 0.16 (s, 3H), 0.13 (s, 3H), 0.13 (s, 3H), 0.11 (s, 3H); <sup>13</sup>C NMR (101 MHz, Chloroform-*d*)  $\delta$  135.5, 117.0, 97.4, 78.7, 74.44, 74.43, 70.4, 67.2, 25.9, 18.2, 16.9, -4.1, -4.3, -4.7, -5.2; HRMS (ESI) *m/z* calcd for C<sub>21</sub>H<sub>44</sub>N<sub>3</sub>O<sub>4</sub>Si<sub>2</sub> [M+H]<sup>+</sup> 458.2865, found 458.2871.

***tert*-Butyldimethylsilyl 2-azido-2-deoxy-4-*O*-(2-hydroxyethyl)-3-*O*-(*tert*-butyldimethylsilyl)-1- $\beta$ -D-fucopyranoside (**S83**)**

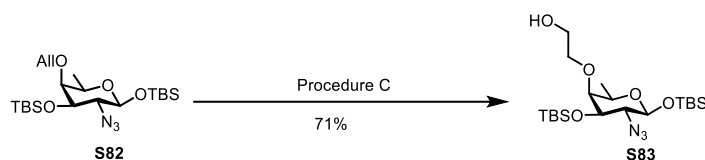

Following the general procedure C, **S82** (1.83 g, 3.99 mmol, 1.0 equiv) was treated with 2,6-lutidine (930  $\mu$ L, 8.04 mmol, 2.0 equiv), OsO<sub>4</sub> (0.0234 mol/L solution in *t*-BuOH, 3.4 mL, 80.0  $\mu$ mol, 0.02 equiv) and NaIO<sub>4</sub> (3.41 g, 15.96 mmol, 4.0 equiv) in 1,4-dioxane/H<sub>2</sub>O (40.0 mL, *v/v* = 3:1) to give the aldehyde. The aldehyde was treated with NaBH<sub>4</sub> (307.6 mg, 8.00 mmol, 2.0 equiv) in MeOH (10.0 mL) to give **S83** (1.31 g, 2.84

mmol, 71%) as a colorless oil after purification by silica gel column chromatography (PE:EA = 7:1).  $[\alpha]_{\text{D}}^{25} = +5.89$  (*c* 0.6, CHCl<sub>3</sub>); <sup>1</sup>H NMR (400 MHz, Chloroform-*d*)  $\delta$  4.24 (d, *J* = 7.2 Hz, 1H), 3.78–3.68 (m, 1H), 3.66–3.61 (m, 1H), 3.61–3.53 (m, 2H), 3.37–3.23 (m, 3H), 3.11 (d, *J* = 2.4 Hz, 1H), 2.71 (s, 1H), 1.14 (d, *J* = 6.4 Hz, 3H), 0.79 (s, 9H), 0.78 (s, 9H), 0.02 (s, 3H), -0.00 (s, 3H), -0.01 (s, 3H), -0.02 (s, 3H); <sup>13</sup>C NMR (101 MHz, Chloroform-*d*)  $\delta$  97.4, 81.0, 75.7, 74.3, 70.6, 67.1, 62.3, 26.0, 25.8, 18.3, 18.1, 16.9, -4.1, -4.2, -4.6, -5.1; HRMS (ESI) *m/z* calcd for C<sub>20</sub>H<sub>43</sub>ClN<sub>3</sub>O<sub>5</sub>Si<sub>2</sub> [M+Cl]<sup>-</sup> 496.2435, found 496.2440.

***tert*-Butyldimethylsilyl 2-azido-2-deoxy-4-*O*-{2-[(1,3-dioxoisindolin-2-yl)oxy]-ethyl}-3-*O*-(*tert*-butyldimethylsilyl)-1- $\beta$ -D-fucopyranoside (**18**)**

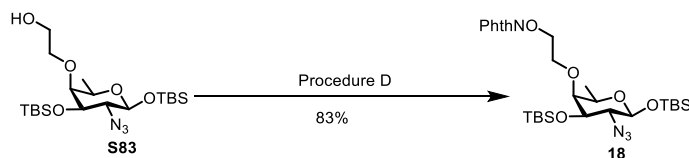

Following the general procedure D, **S83** (1.31 g, 2.84 mmol, 1.0 equiv) was treated with PPh<sub>3</sub> (894.4 mg, 3.41 mmol, 1.2 equiv), *N*-hydroxyphthalimide (556.3 mg, 3.41 mmol, 1.2 equiv) and diisopropylazodicarboxylate (680  $\mu$ L, 3.41 mmol, 1.2 equiv) in THF (10.0 mL) to give **18** (1.43 g, 2.36 mmol, 83%) as a colorless oil after purification by silica gel column chromatography (PE:EA = 8:1).  $[\alpha]_{\text{D}}^{25} = +6.72$  (*c* 0.9, CHCl<sub>3</sub>); <sup>1</sup>H NMR (400 MHz, Chloroform-*d*)  $\delta$  7.73–7.66 (m, 2H), 7.65–7.59 (m, 2H), 4.37–4.28 (m, 1H), 4.23 (d, *J* = 7.1 Hz, 1H), 4.22–4.11 (m, 2H), 3.93–3.80 (m, 1H), 3.39–3.32 (m, 1H), 3.31–3.28 (m, 1H), 3.28–3.17 (m, 2H), 1.21 (d, *J* = 6.4 Hz, 3H), 0.79 (s, 9H), 0.78 (s, 9H), 0.02 (s, 3H), 0.00 (s, 3H), -0.01 (s, 3H), -0.02 (s, 3H); <sup>13</sup>C NMR (101 MHz, Chloroform-*d*)  $\delta$  163.6, 134.6, 129.0, 123.6, 97.4, 81.1, 78.2, 74.7, 71.4, 70.5, 67.0, 25.9, 25.8, 18.2, 18.1, 16.7, -4.1, -4.3, -4.7, -5.1; HRMS (ESI) *m/z* calcd for C<sub>28</sub>H<sub>46</sub>ClN<sub>4</sub>O<sub>7</sub>Si<sub>2</sub> [M+Cl]<sup>-</sup> 641.2599, found 641.2607.

***tert*-Butyldimethylsilyl 2-azido-2-deoxy-4-*O*-(2-hydroxyethyl)-4-*C*-[2-(methoxycarbonyl)allyl]-3-*O*-(*tert*-butyldimethylsilyl)-1- $\beta$ -D-fucopyranoside (**17**)**

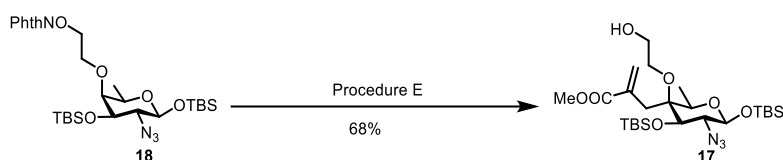

Following the general procedure E, **18** (1.48 g, 2.44 mmol, 1.0 equiv) and **2a** (1.86 g, 7.32 mmol, 3.0 equiv) were treated with hantzsch ester (927.0 mg, 3.66 mmol, 1.5 equiv) and *fac*-Ir(ppy)<sub>3</sub> (16.0 mg, 24.4 μmol, 0.01 equiv) in 1,4-dioxane (48.8 mL) to give **17** (932.9 mg, 1.67 mmol, 68%) as a colorless oil after purification by silica gel column chromatography (PE:EA = 6:1).  $[\alpha]_{\text{D}}^{25} = +18.46$  (c 2.9, CHCl<sub>3</sub>); <sup>1</sup>H NMR (400 MHz, Chloroform-*d*) δ 6.23 (s, 1H), 5.66 (s, 1H), 4.38 (d, *J* = 6.9 Hz, 1H), 4.08–3.99 (m, 1H), 3.88–3.78 (m, 1H), 3.76 (s, 3H), 3.73–3.64 (m, 2H), 3.55–3.44 (m, 2H), 3.31–3.22 (m, 1H), 2.88–2.71 (m, 2H), 2.57 (s, 1H), 1.21 (d, *J* = 6.2 Hz, 3H), 0.92 (s, 9H), 0.91 (s, 9H), 0.20 (s, 3H), 0.17 (s, 3H), 0.12 (s, 6H); <sup>13</sup>C NMR (101 MHz, Chloroform-*d*) δ 168.2, 136.7, 128.7, 97.4, 78.5, 75.5, 73.7, 68.0, 66.7, 62.8, 52.4, 32.5, 26.3, 25.8, 18.9, 18.1, 15.4, -3.5, -4.1, -4.2, -5.0; HRMS (ESI) *m/z* calcd for C<sub>25</sub>H<sub>49</sub>ClN<sub>3</sub>O<sub>7</sub>Si<sub>2</sub> [M+Cl]<sup>-</sup> 594.2803, found 594.2811.

***tert*-Butyldimethylsilyl 2-azido-2-deoxy-4-*C*-[2-(methoxycarbonyl)allyl]-3-*O*-(*tert*-butyldimethylsilyl)-1-β-*D*-fucopyranoside (**20**)**

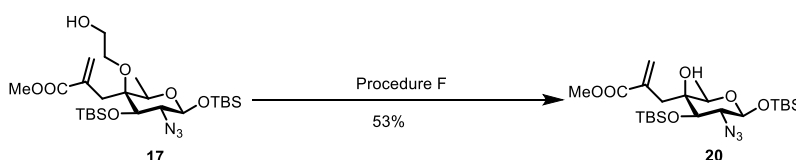

Following the general procedure F, **17** (559.9 mg, 1.00 mmol, 1.0 equiv) was treated with TEMPO (15.6 mg, 100.0 μmol, 0.2 equiv) and PhI(OAc)<sub>2</sub> (644.2 mg, 2.00 mmol, 2.0 equiv) in DCM/H<sub>2</sub>O (11 mL, *v/v* = 10:1) to give the acid (547.5 mg, 954.1 μmol, 95%) as a colorless oil. The acid (274.6 mg, 478.5 μmol, 1.0 equiv) was treated with DPPA (113 μL, 526.4 μmol, 1.1 equiv) and DIPEA (92 μL, 526.4 μmol, 1.1 equiv) in DMF (5.0 mL) to give **20** (137.3 mg, 266.2 μmol, 56%) as a colorless oil after purification by silica gel column chromatography (PE:EA = 3:1).  $[\alpha]_{\text{D}}^{25} = +13.85$  (c 0.2, CHCl<sub>3</sub>); <sup>1</sup>H NMR (400 MHz, Chloroform-*d*) δ 6.11 (s, 1H), 5.51 (s, 1H), 4.27 (d, *J* = 7.6 Hz, 1H), 3.63 (s, 3H), 3.26 (d, *J* = 9.5 Hz, 1H), 3.20 (d, *J* = 7.6 Hz, 1H), 3.19–3.14

(m, 1H), 2.66 (d,  $J = 1.2$  Hz, 1H), 2.61 (d,  $J = 14.2$  Hz, 1H), 2.35 (d,  $J = 14.3$  Hz, 1H), 1.14 (d,  $J = 6.2$  Hz, 3H), 0.82 (s, 9H), 0.78 (s, 9H), 0.09 (s, 3H), 0.06 (s, 3H), 0.00 (s, 3H), -0.01 (s, 3H).;  $^{13}\text{C}$  NMR (101 MHz, Chloroform-*d*)  $\delta$  168.2, 136.7, 129.2, 96.9, 74.7, 74.5, 73.0, 67.8, 52.3, 36.9, 26.2, 25.8, 18.8, 18.1, 15.1, -3.5, -4.1, -4.2, -5.1.; HRMS (ESI)  $m/z$  calcd for  $\text{C}_{23}\text{H}_{46}\text{N}_3\text{O}_6\text{Si}_2$   $[\text{M}+\text{H}]^+$  516.2920, found 516.2925.

**3-((2*R*,3*S*,4*R*,5*R*,6*S*)-5-azido-4,6-bis((*tert*-butyldimethylsilyl)oxy)-3-hydroxy-2-methyl-tetrahydro-2*H*-pyran-3-yl)-2-hydroxyacrylamide (**16**)**

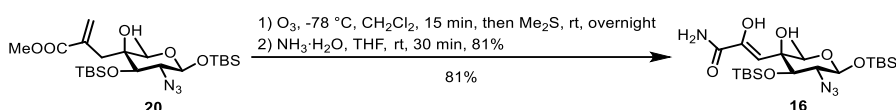

To a solution of **20** (30.2 mg, 58.3  $\mu\text{mol}$ , 1.0 equiv) in  $\text{CH}_2\text{Cl}_2$  (2.0 mL) was cooled to  $-78$  °C. The  $\text{O}_3$  (generated from  $\text{O}_2$  and carried by the flow of  $\text{O}_2$ ) was bubbled through this solution for 15 min. The colour of the solution turned blue, which indicated the saturation of  $\text{O}_3$  in DCM. The excess amount of  $\text{O}_3$  was blown off by the flow of  $\text{O}_2$  and the purple colour disappeared. To this solution,  $\text{Me}_2\text{S}$  (0.20 mL, excess) was added to reduce the peroxide intermediate. The resultant solution was stirred for overnight at room temperature. The mixture was evaporated to dryness. The crude product obtained above was dissolved in dry THF (2.0 mL),  $\text{NH}_3\cdot\text{H}_2\text{O}$  (50  $\mu\text{L}$ ) was added at room temperature under an argon atmosphere. The resultant solution was stirred for 30 min at room temperature. The resultant mixture was extracted with DCM and washed with  $\text{H}_2\text{O}$  and brine. The organic layer was collected, dried over  $\text{Na}_2\text{SO}_4$ , filtered off the solid and concentrated *in vacuo*. The resulting residue was purified by silica gel column chromatography (PE:EA = 3.5:1) to afford **16** (23.8 mg, 47.3  $\mu\text{mol}$ , 81%) as a white foam.  $[\alpha]_{\text{D}}^{25} = +22.03$  ( $c$  1.2,  $\text{CHCl}_3$ );  $^1\text{H}$  NMR (400 MHz, Chloroform-*d*)  $\delta$  6.57 (brs, 1H), 5.54 (s, 1H), 4.43 (dd,  $J = 5.5, 2.0$  Hz, 1H), 3.74–3.52 (m, 1H), 3.40–3.24 (m, 2H), 1.87 (brs, 1H), 0.96 (d,  $J = 6.4$  Hz, 3H), 0.78 (s, 9H), 0.68 (s, 9H), -0.01 (s, 9H), -0.16 (s, 3H);  $^{13}\text{C}$  NMR (101 MHz, Chloroform-*d*)  $\delta$  169.8, 143.8, 115.5, 97.1, 86.5, 72.4, 71.0, 68.0, 25.6, 18.0, 18.0, 14.0, -4.2, -4.4, -4.7, -5.1; HRMS (ESI)  $m/z$  calcd for  $\text{C}_{21}\text{H}_{43}\text{N}_4\text{O}_6\text{Si}_2$   $[\text{M}+\text{H}]^+$  503.2716, found 503.2724.

## References

- [1] K. Yamada, N. Hayakawa, H. Fujita, M. Kitamura and M. Kunishima, *Chem. Pharm. Bull.*, 2017, **65**, 112–115.
- [2] V. Bou and J. Vilarrasa, *Tetrahedron Lett.*, 1990, **31**, 567–568.
- [3] M. A. Nashed and L. Anderson, *Carbohydr. Res.*, 1977, **56**, 325–336.
- [4] H. R. H. Elsaidi and T. L. Lowary, *Chem. Sci.*, 2015, **6**, 3161–3172.
- [5] Z. Ma, J. Zhang and F. Kong, *Tetrahedron: Asymmetry*, 2003, **14**, 2595–2603.
- [6] G. Zong, X. Cai, X. Liang, J. Zhang and D. Wang, *Carbohydr. Res.*, 2011, **346**, 2533–2539.
- [7] T. Müller and R. R. Schmidt, *Tetrahedron Lett.*, 1997, **38**, 5473–5476.
- [8] L. Chen and F. Kong, *J. Carbohydr. Chem.*, 2002, **21**, 341–353.
- [9] L. Chen and F. Kong, *Carbohydr. Res.*, 2002, **337**, 1373–1380.
- [10] S. Knapp and P. J. Kukkola, *J. Org. Chem.*, 1990, **55**, 1632–1636.
- [11] G. D. Kishore Kumar and S. Baskaran, *J. Org. Chem.*, 2005, **70**, 4520–4523.
- [12] M. K. Christensen, M. Meldal and K. Bock, *J. Chem. Soc., Perkin Trans. 1*, 1993, **13**, 1453–1460.
- [13] P. Ji, Y. Zhang, Y. Wei, H. Huang, W. Hu, P. A. Mariano and W. Wang, *Org. Lett.*, 2019, **21**, 3086–3092.
- [14] J. Kandasamy, D. Atia-Glikin, V. Belakhov and T. Baasov, *Med. Chem. Comm.*, 2011, **2**, 165.
- [15] G. Crucius, M. Hanack and T. Ziegler, *J. Carbohydr. Chem.*, 2015, **34**, 263–302.
- [16] H. Liu, L. Ge, D. Wang, N. Chen and C. Feng, *Angew. Chem., Int. Ed.*, 2019, **58**, 3918–3922.
- [17] J. Li and B. Yu, *Angew. Chem. Int. Ed.*, 2015, **54**, 6618–6621.

## NMR Spectra of new compounds

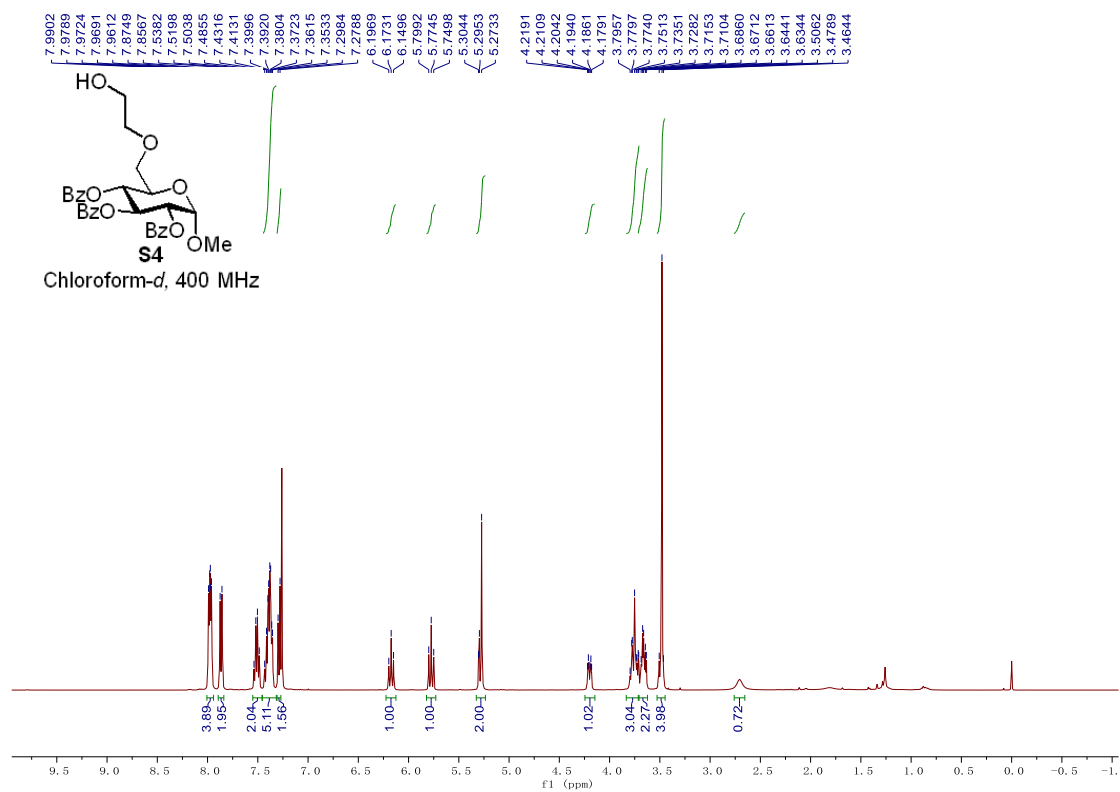

## <sup>1</sup>H NMR Spectra of compound S4

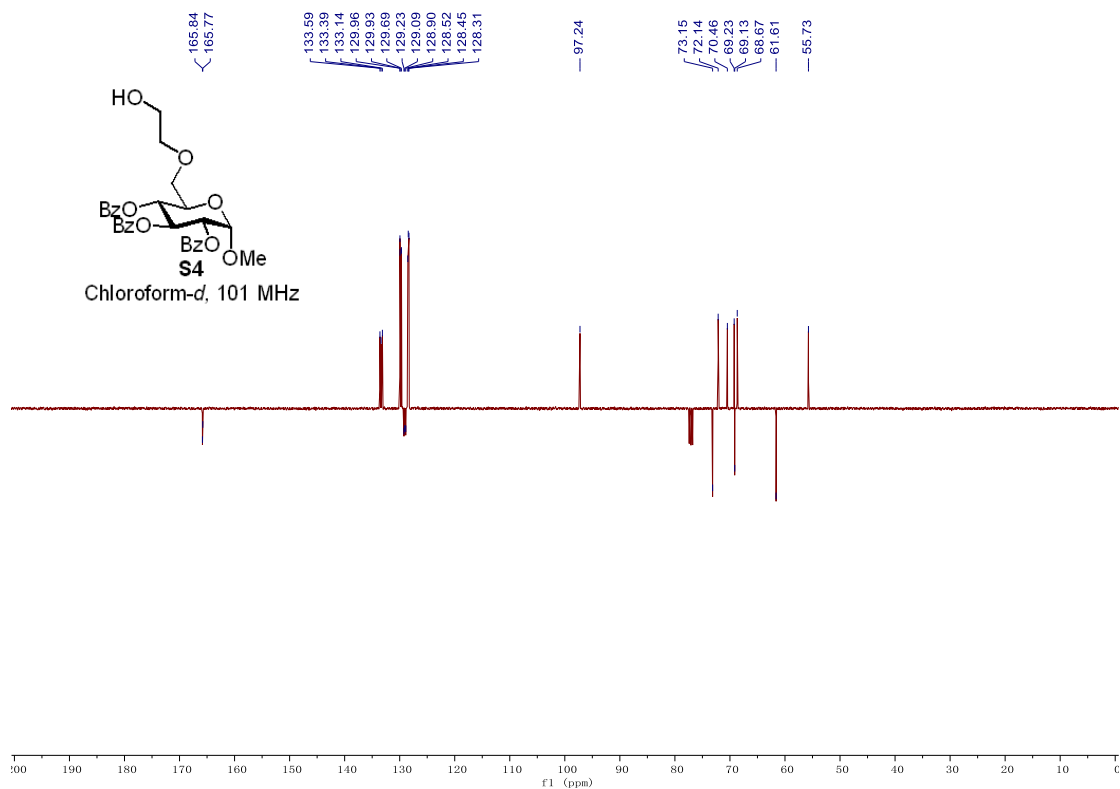

## <sup>13</sup>C NMR Spectra of compound S4



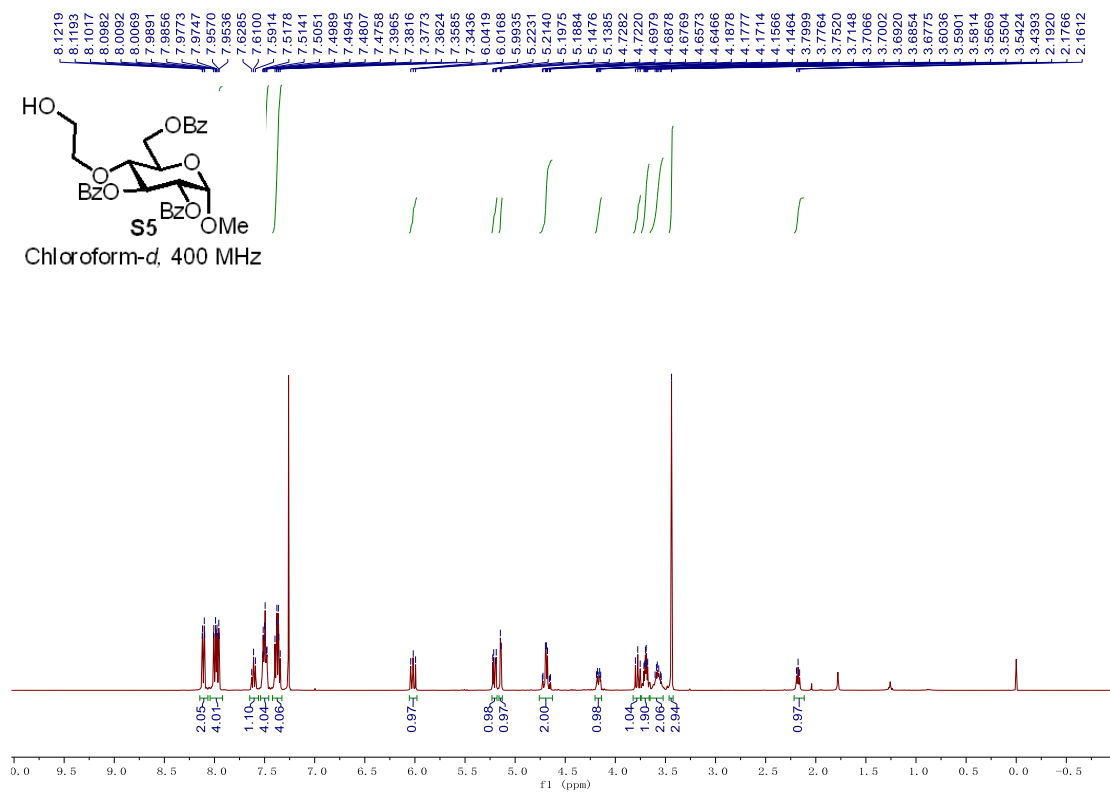

**<sup>1</sup>H NMR Spectra of compound S5**

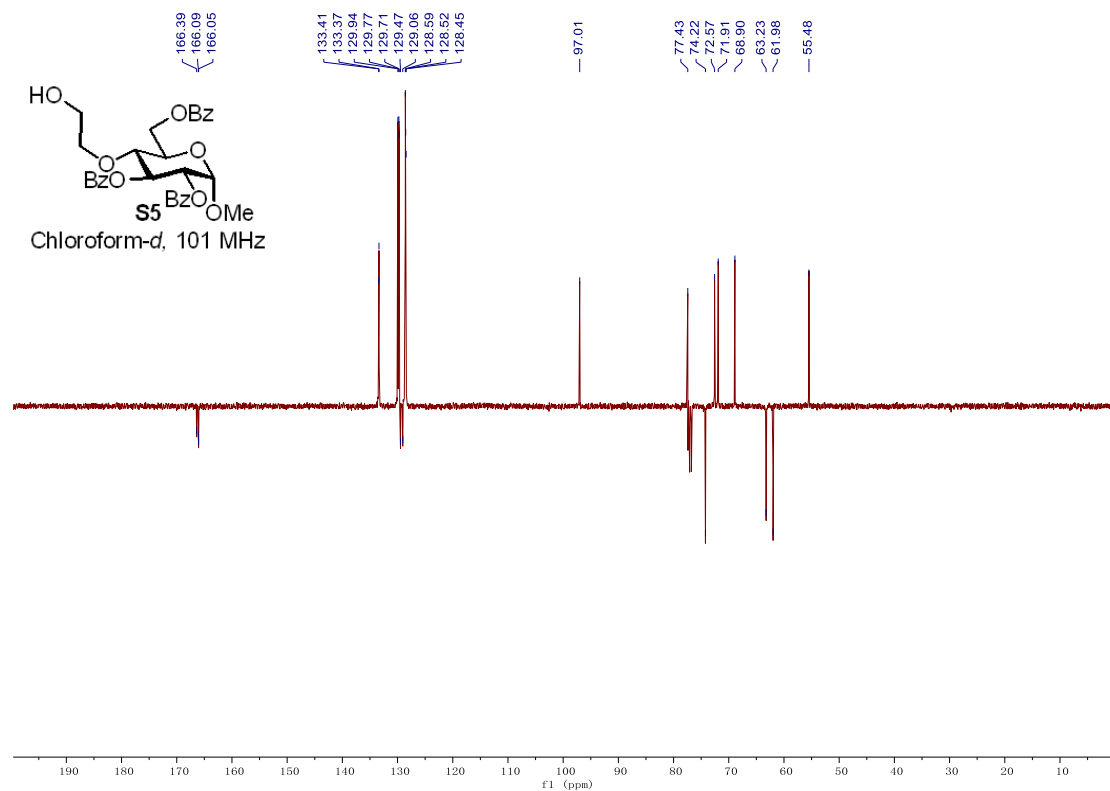

**<sup>13</sup>C NMR Spectra of compound S5**

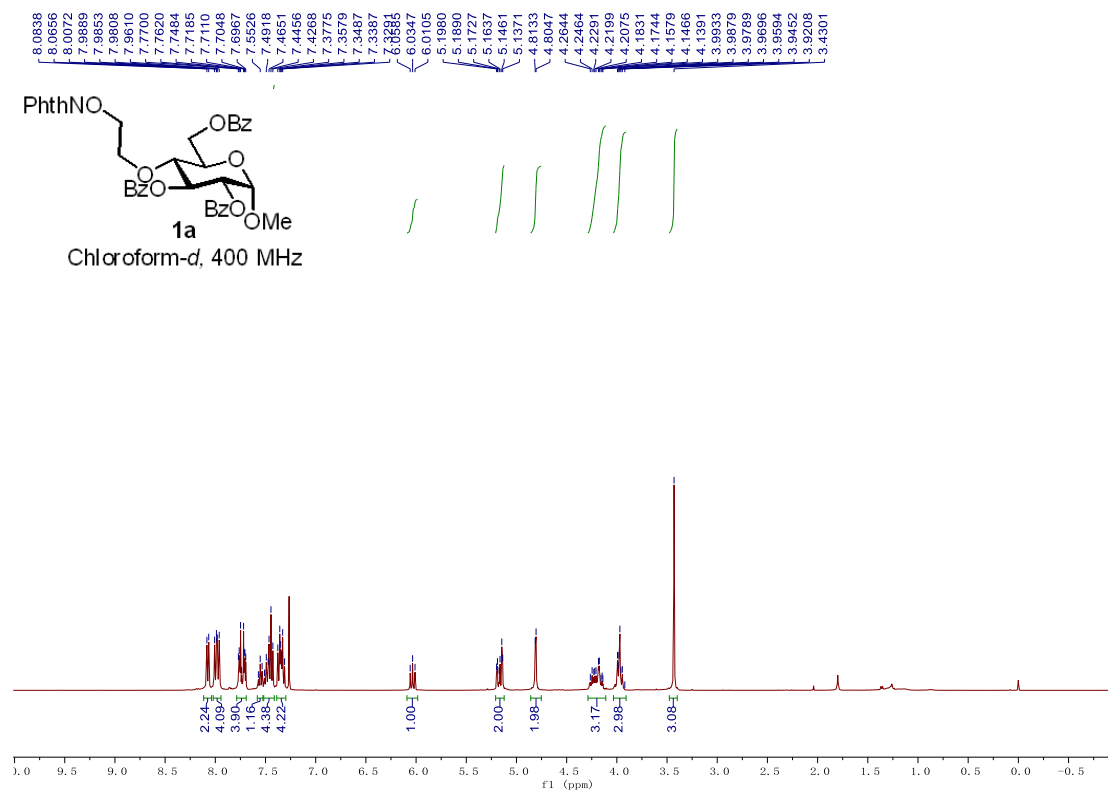

**<sup>1</sup>H NMR Spectra of compound 1a**

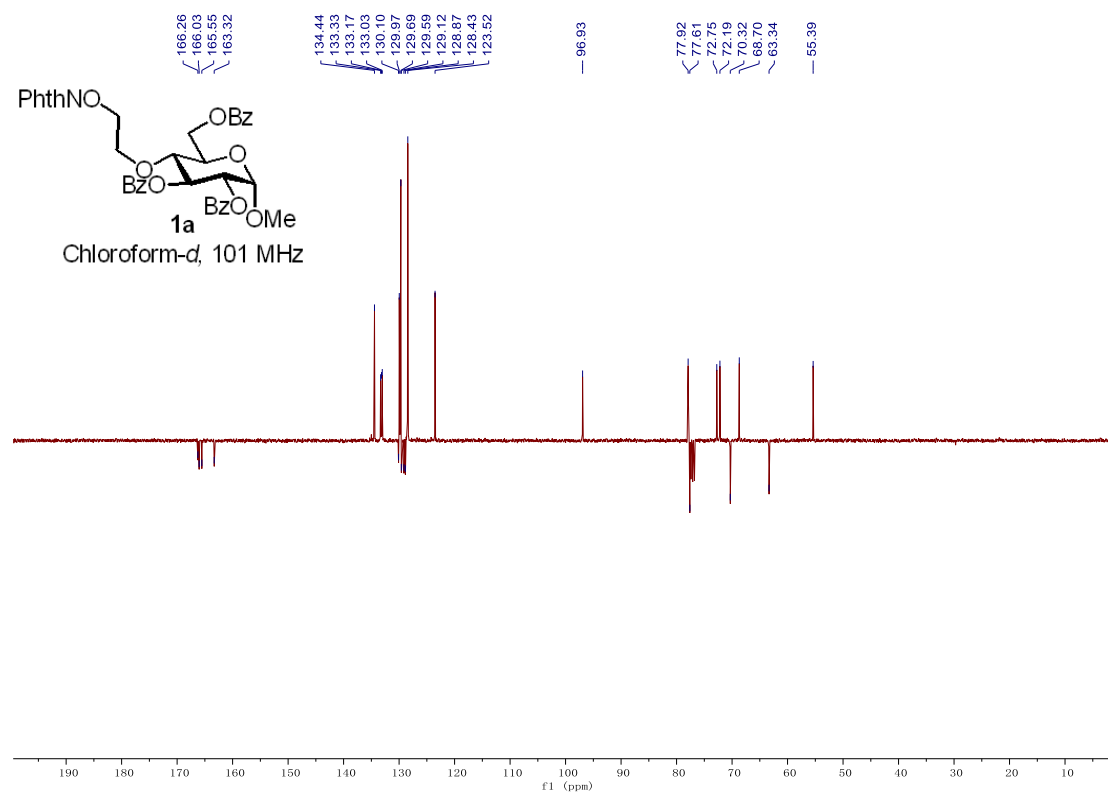

**<sup>13</sup>C NMR Spectra of compound 1a**



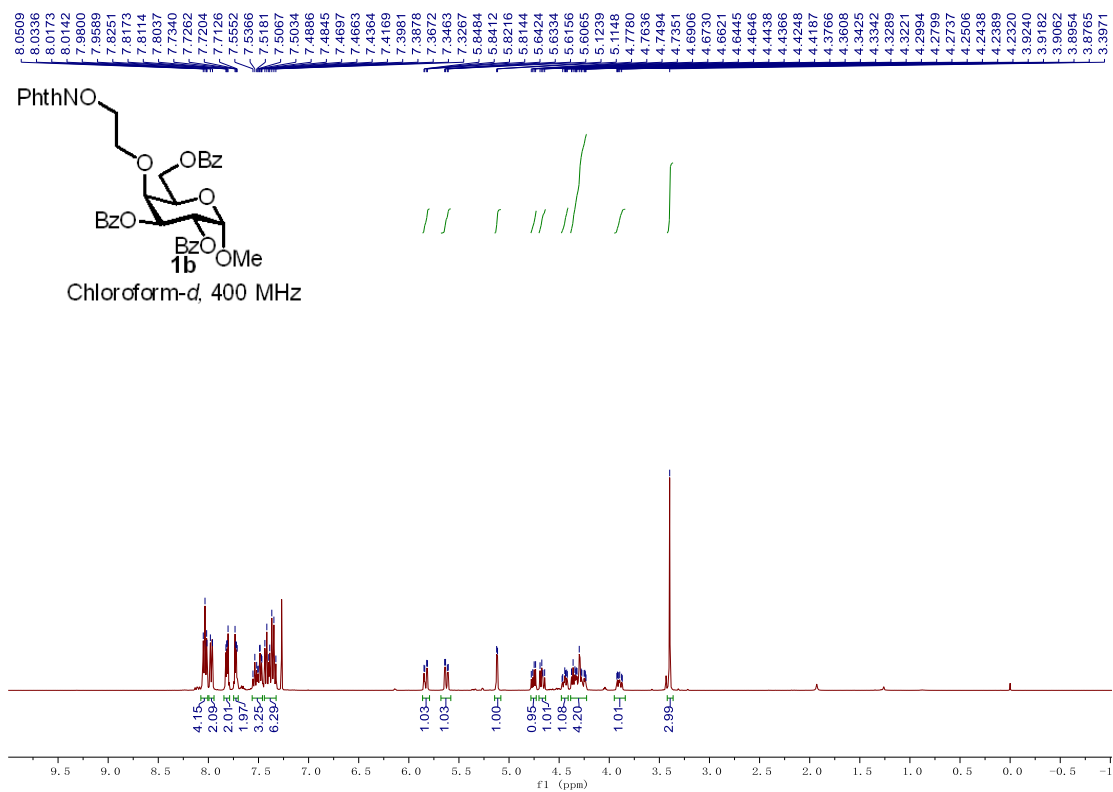

<sup>1</sup>H NMR Spectra of compound **1b**

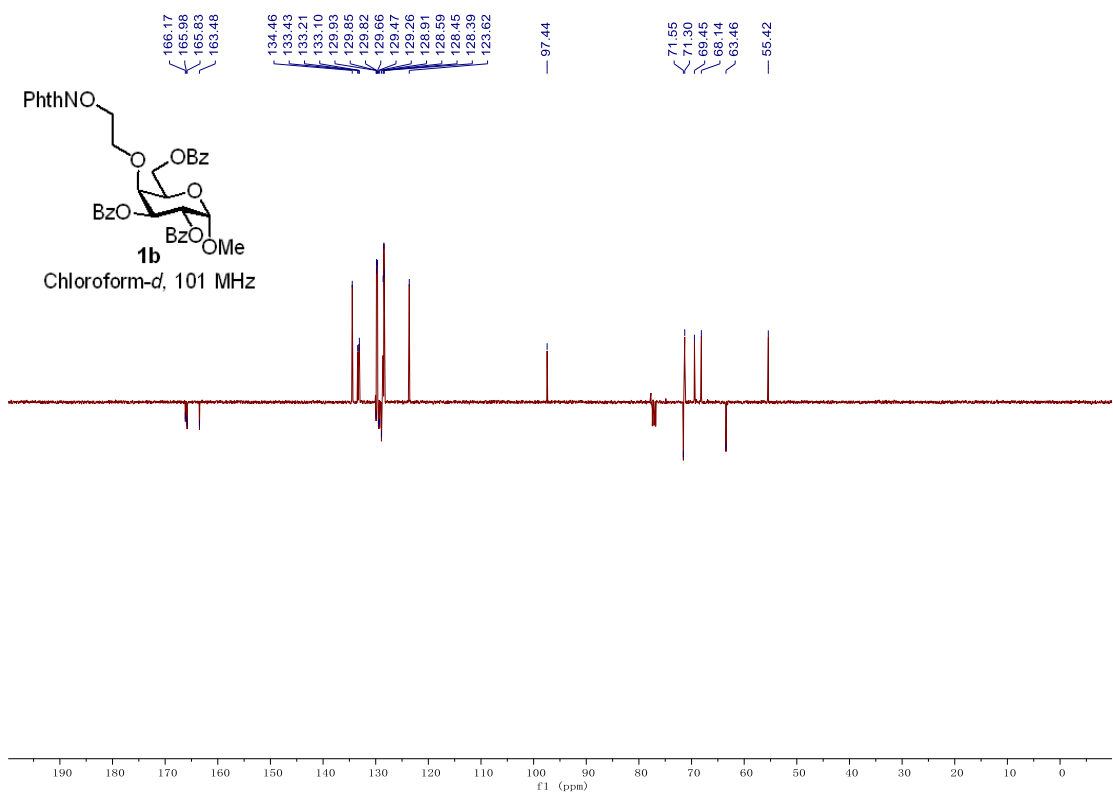

<sup>13</sup>C NMR Spectra of compound **1b**

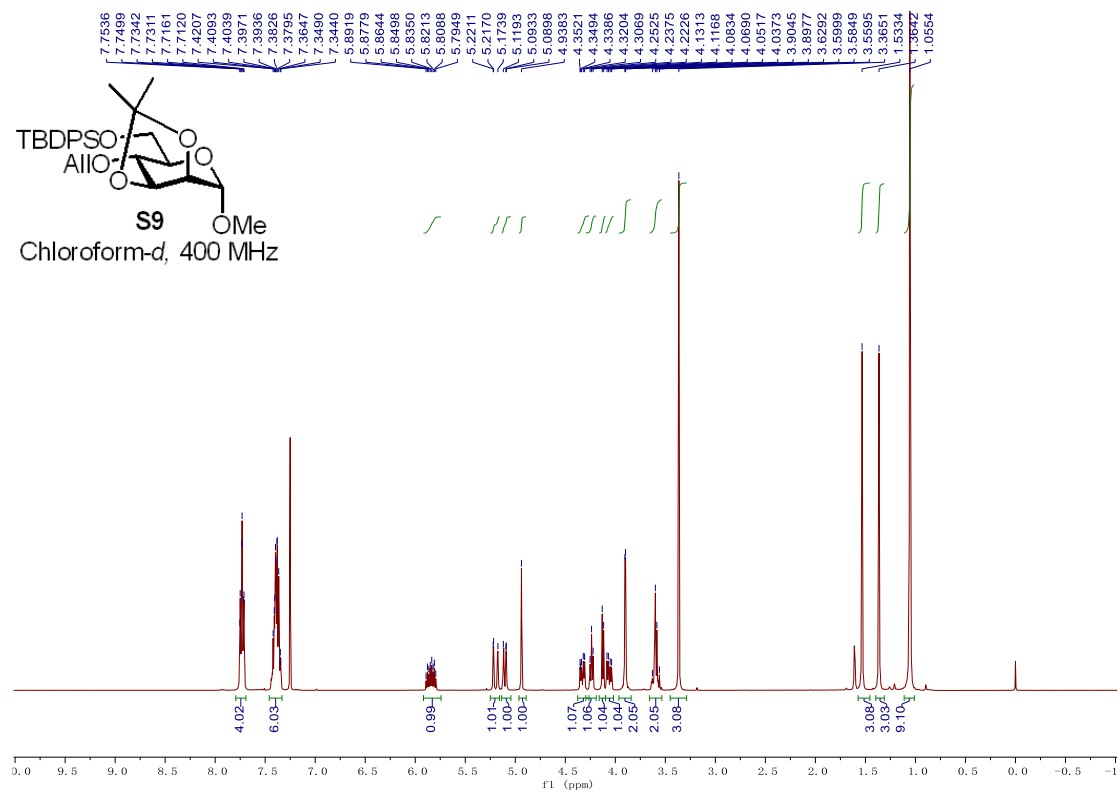

**<sup>1</sup>H NMR Spectra of compound S9**

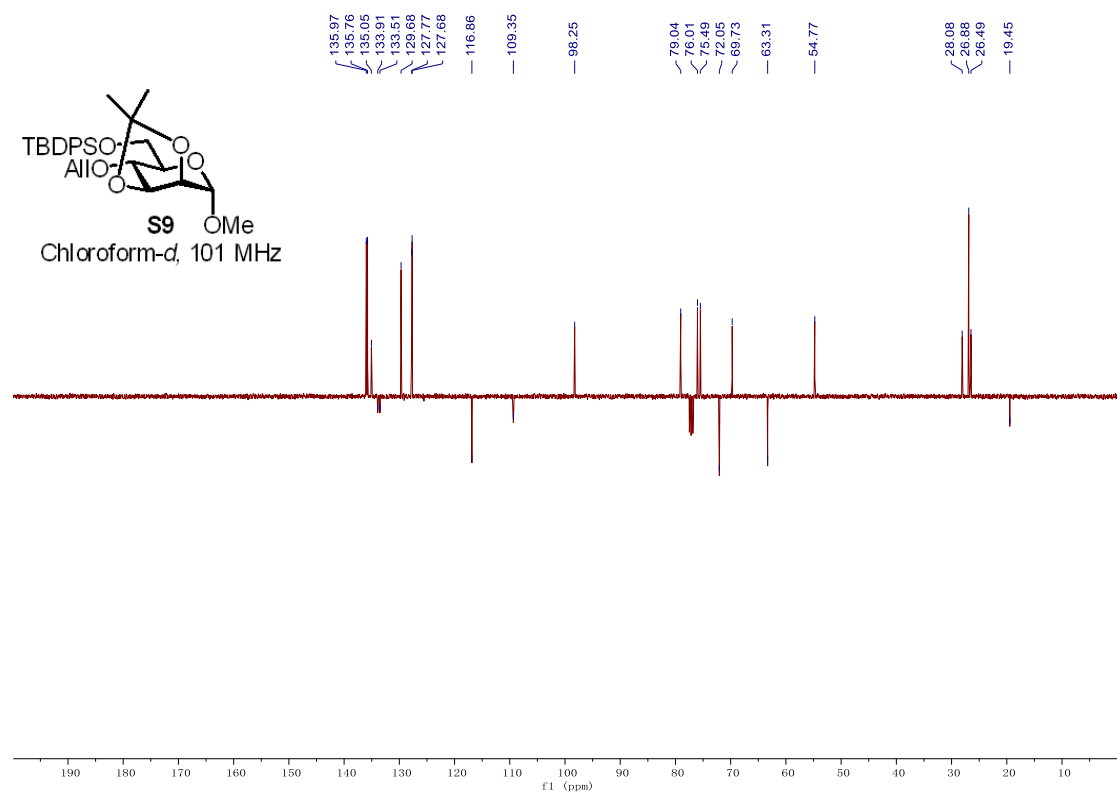

**<sup>13</sup>C NMR Spectra of compound S9**

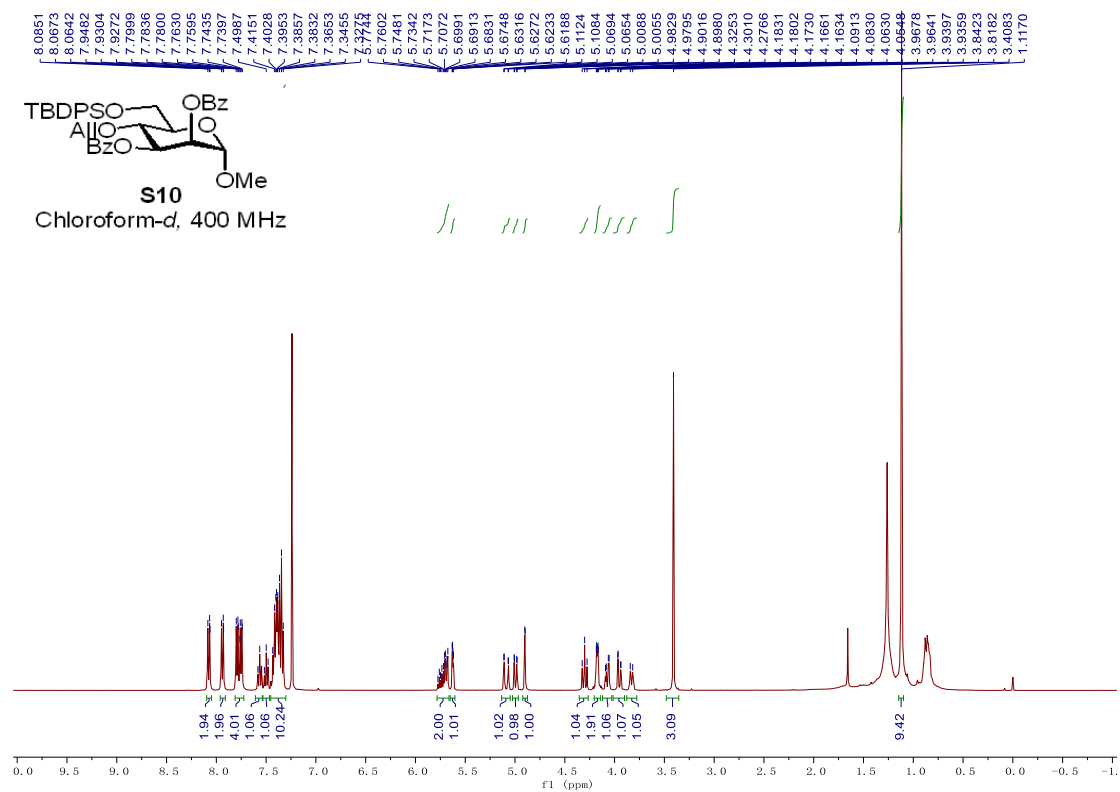

**<sup>1</sup>H NMR Spectra of compound S10**

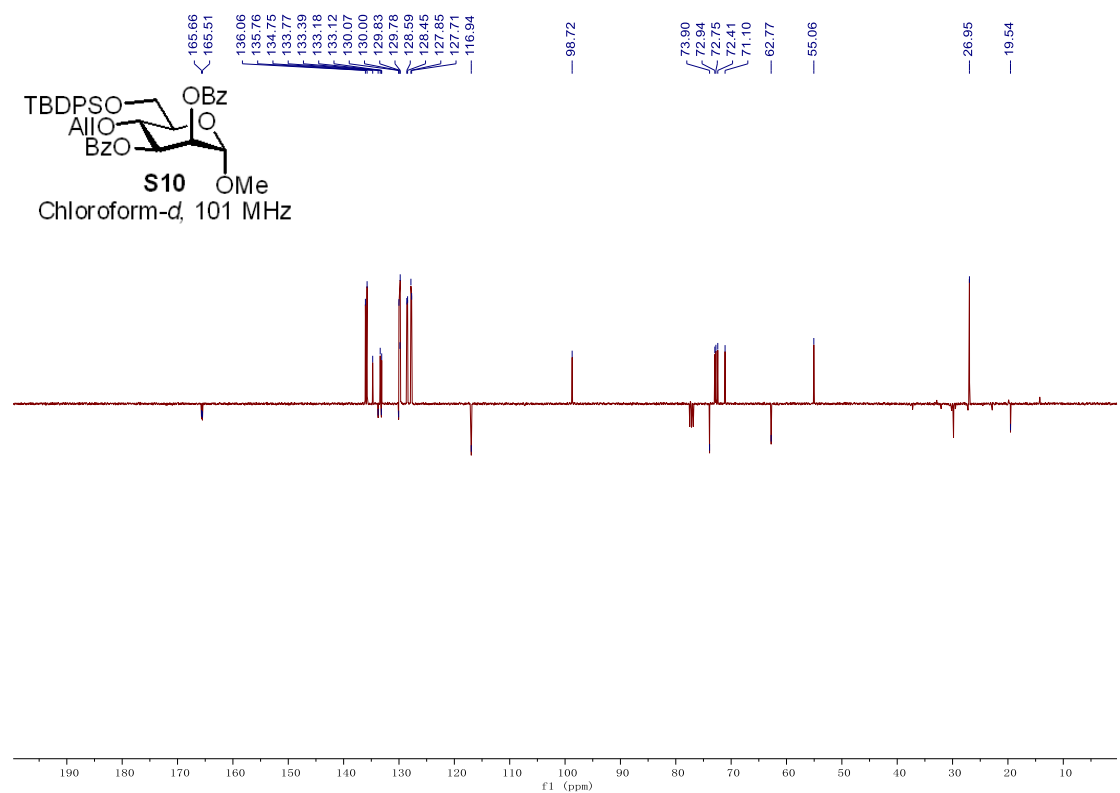

**<sup>13</sup>C NMR Spectra of compound S10**

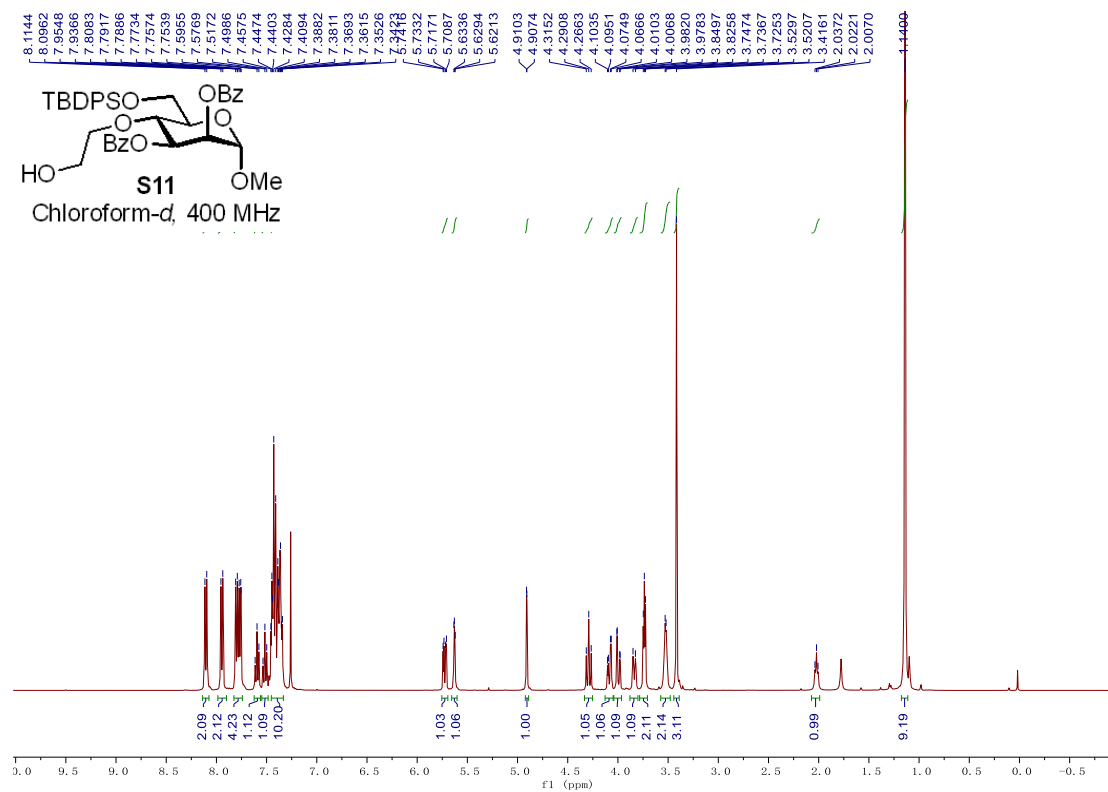

**<sup>1</sup>H NMR Spectra of compound S11**

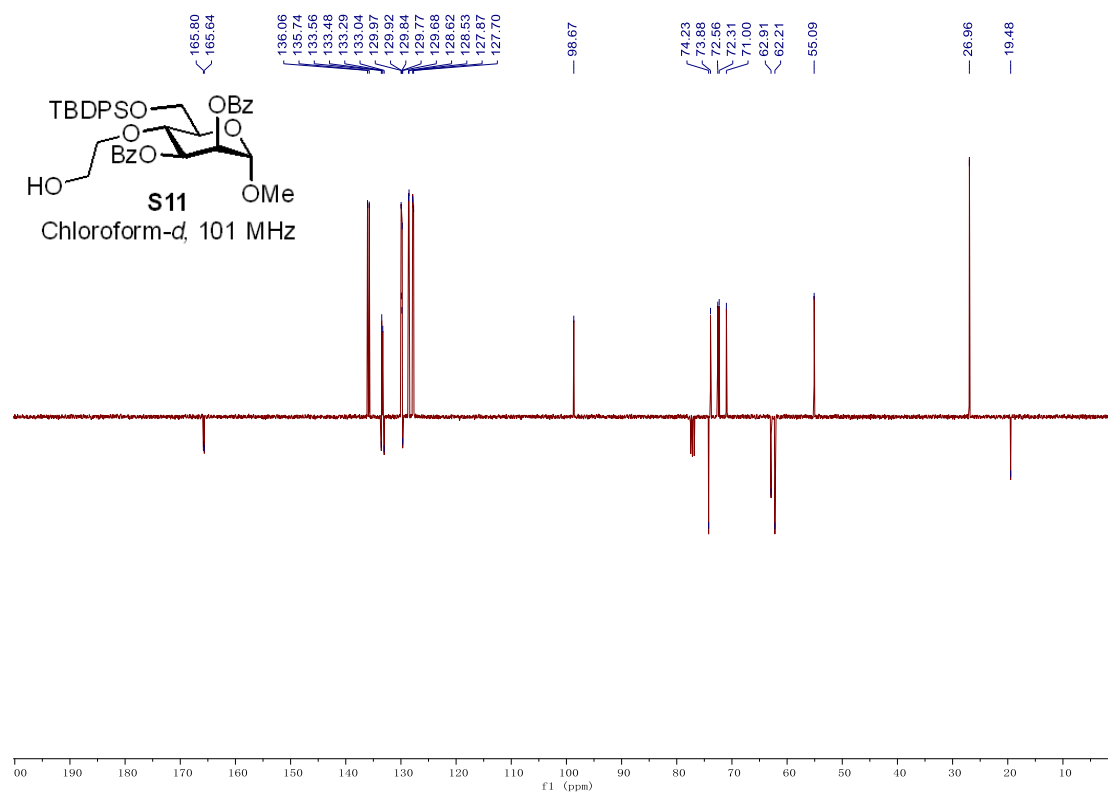

**<sup>13</sup>C NMR Spectra of compound S11**

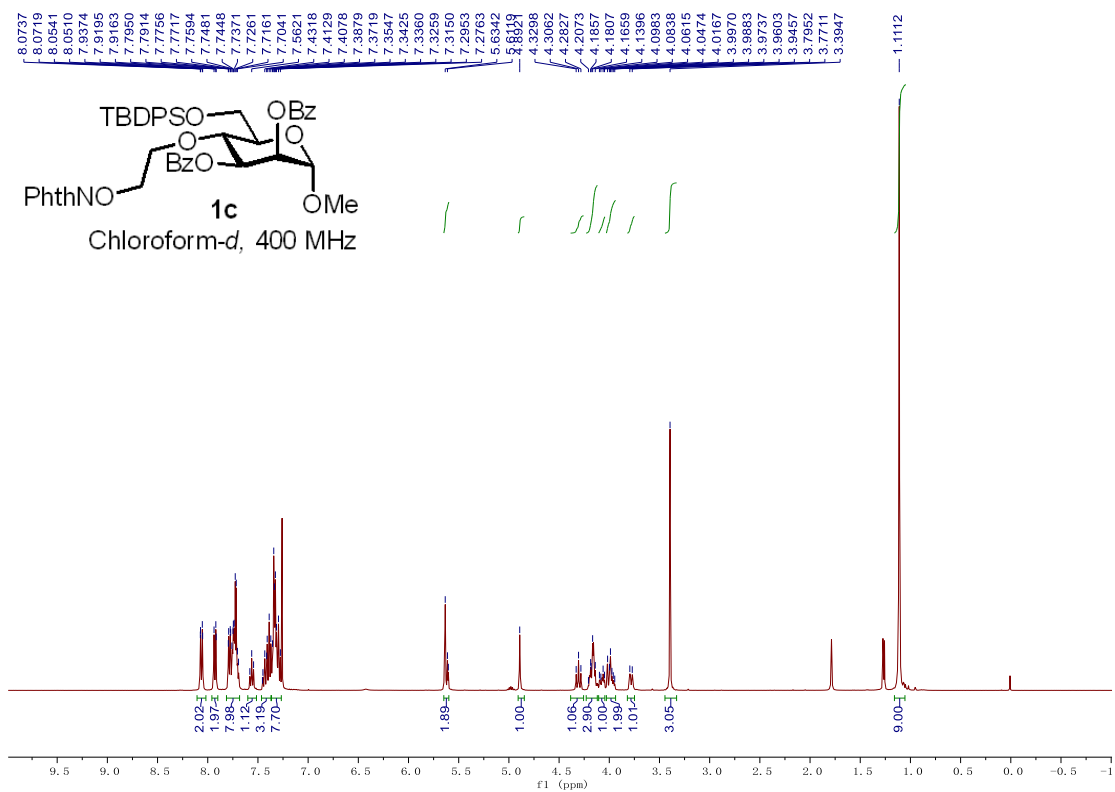

**<sup>1</sup>H NMR Spectra of compound 1c**

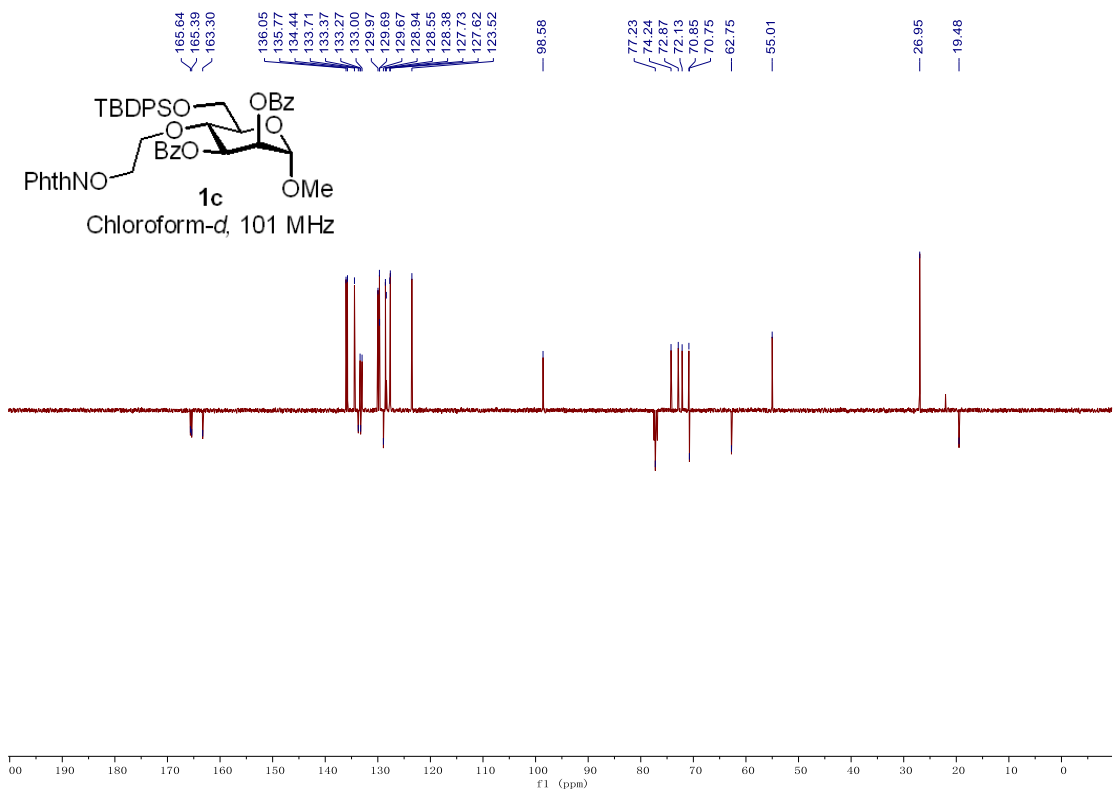

**<sup>13</sup>C NMR Spectra of compound 1c**



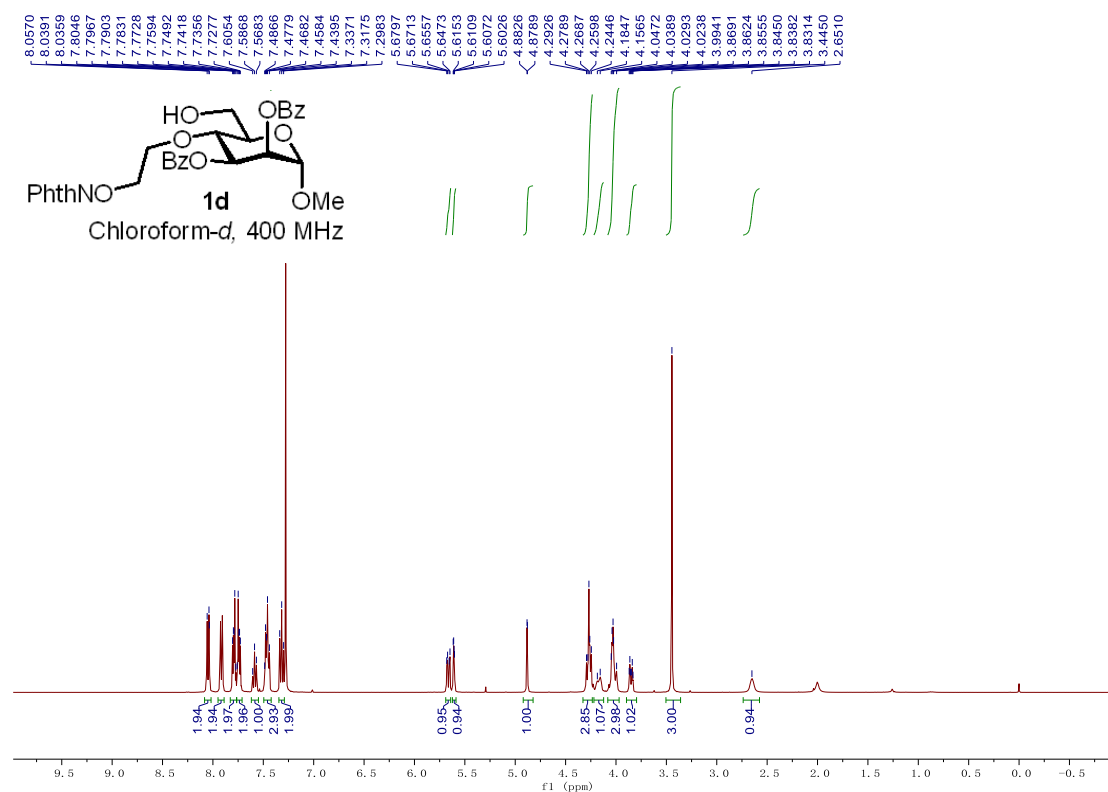

**<sup>1</sup>H NMR Spectra of compound 1d**

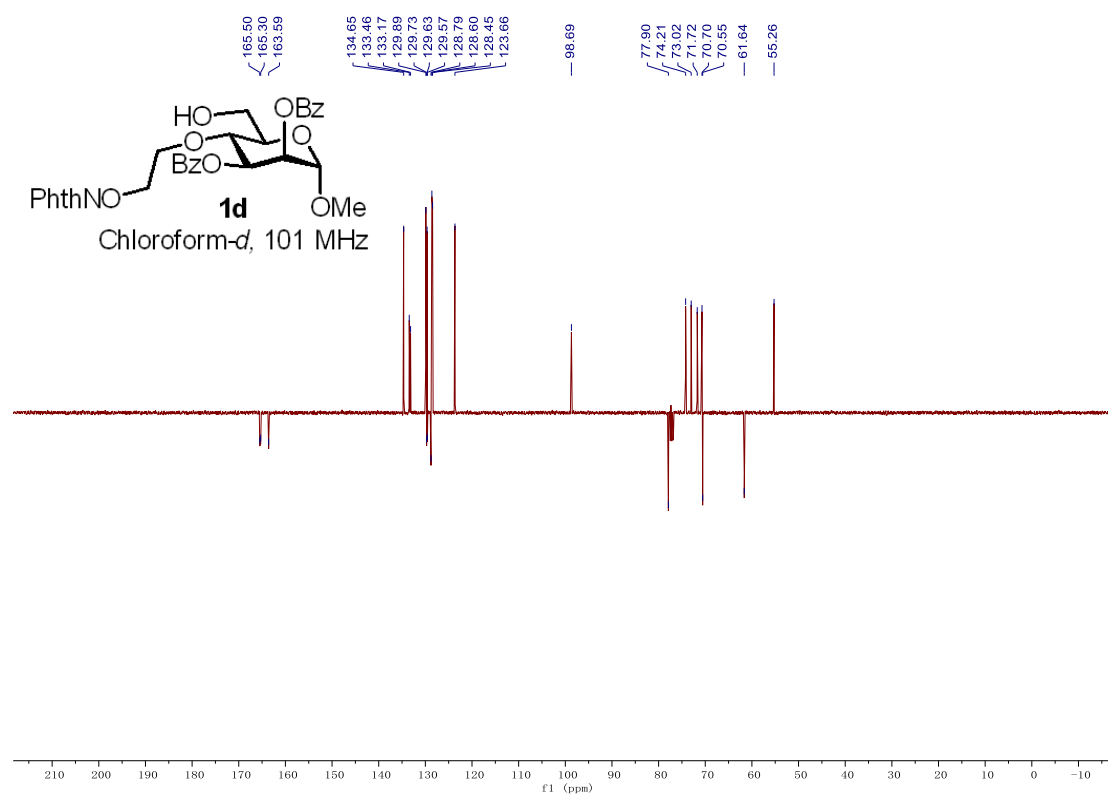

**<sup>13</sup>C NMR Spectra of compound 1d**

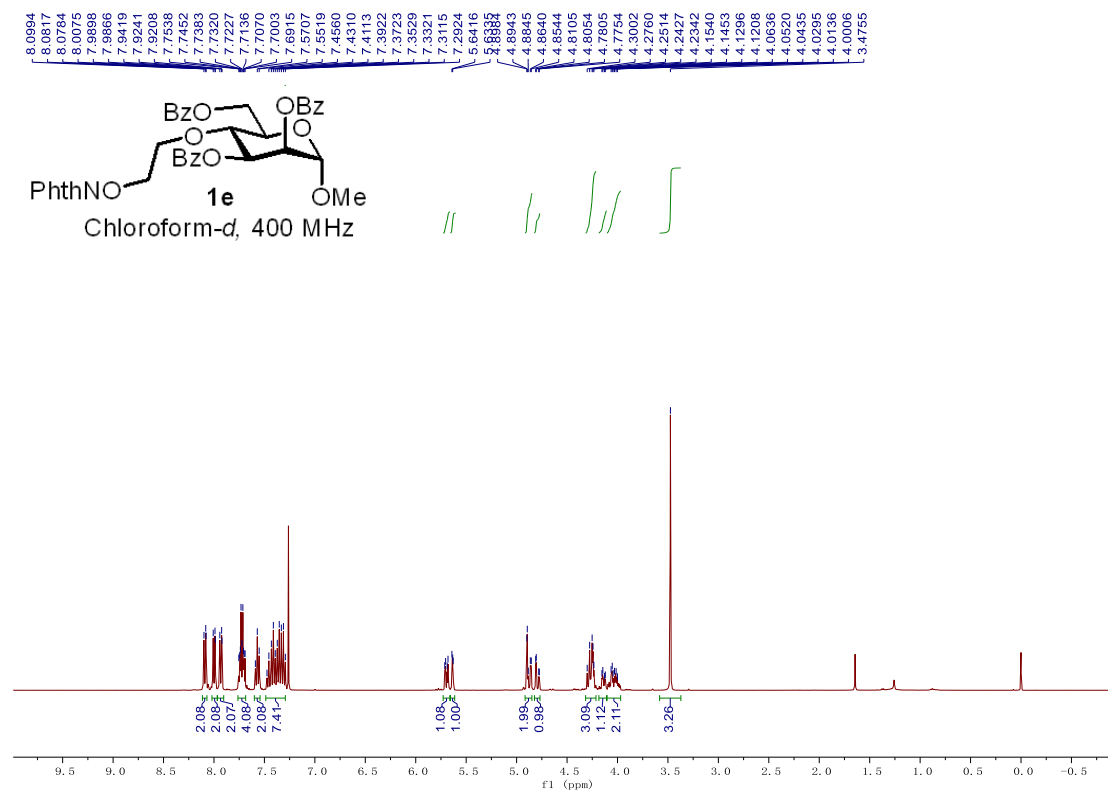

<sup>1</sup>H NMR Spectra of compound **1e**

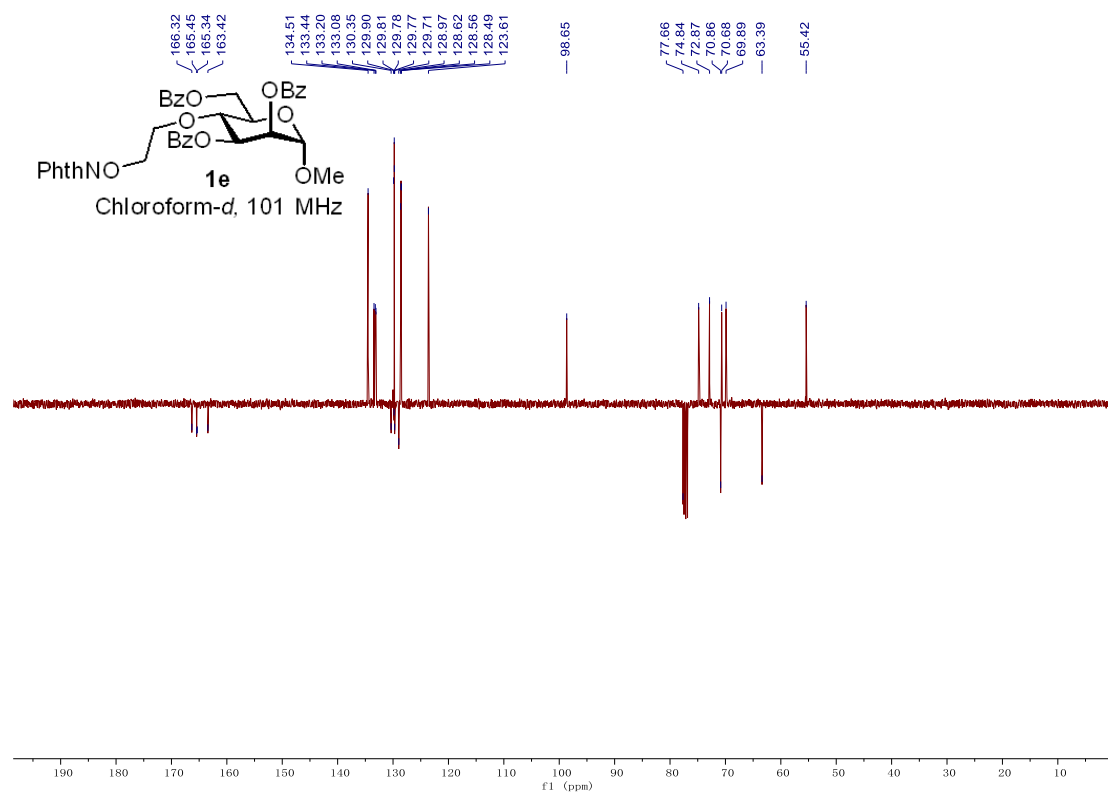

<sup>13</sup>C NMR Spectra of compound **1e**

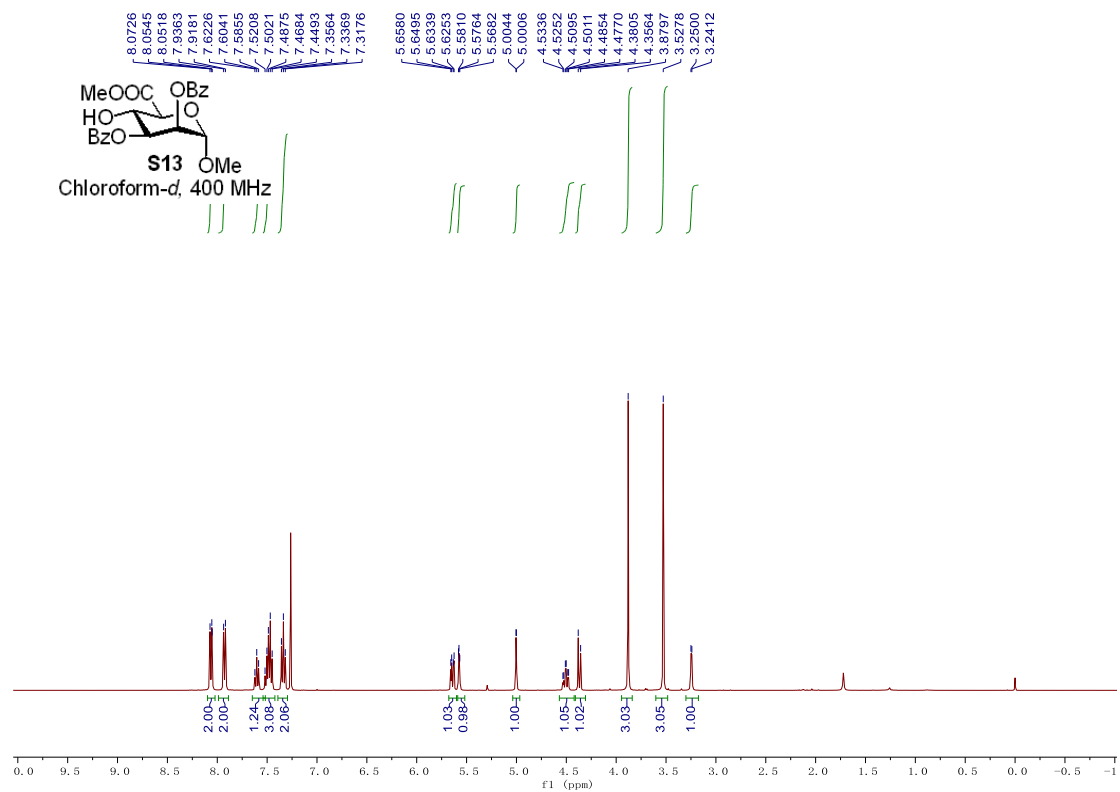

**<sup>1</sup>H NMR Spectra of compound S13**

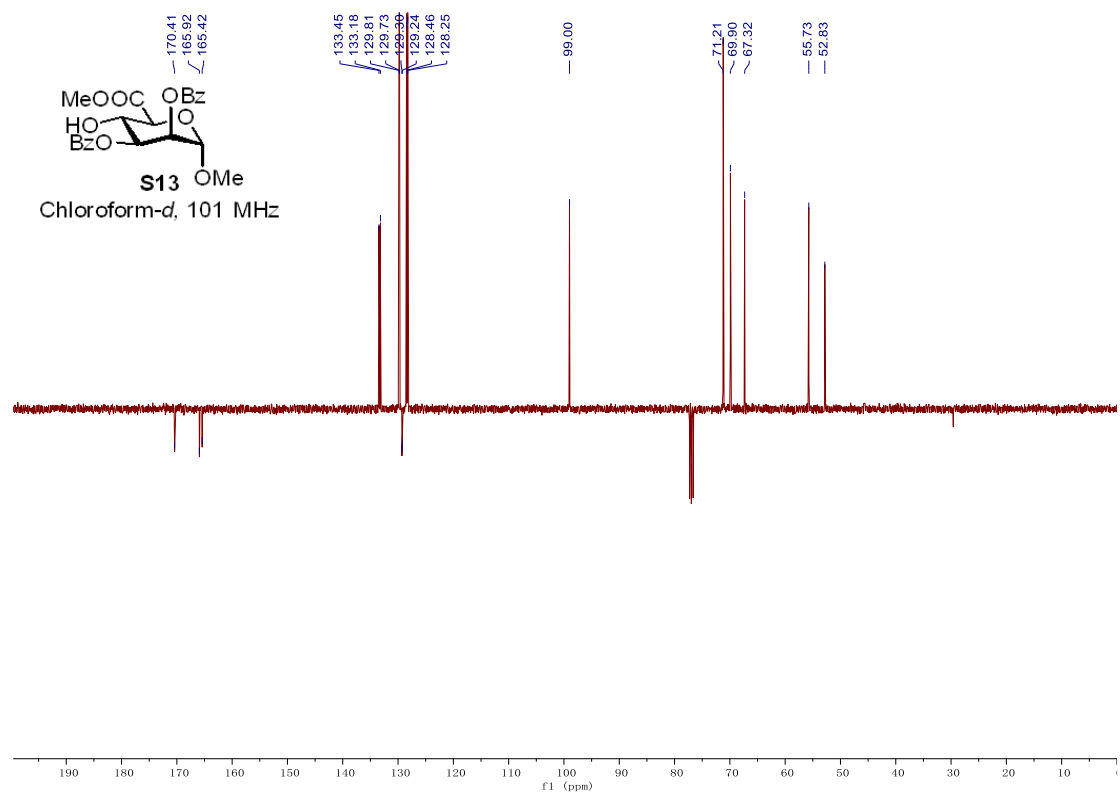

**<sup>13</sup>C NMR Spectra of compound S13**

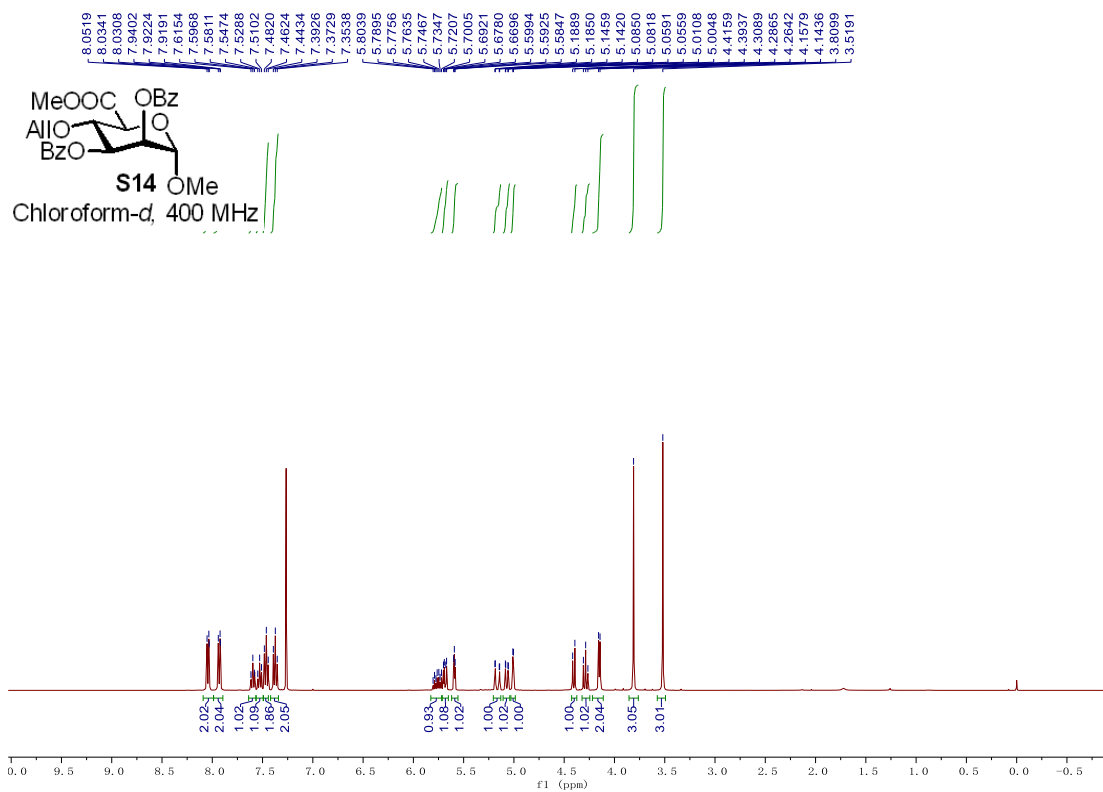

**<sup>1</sup>H NMR Spectra of compound S14**

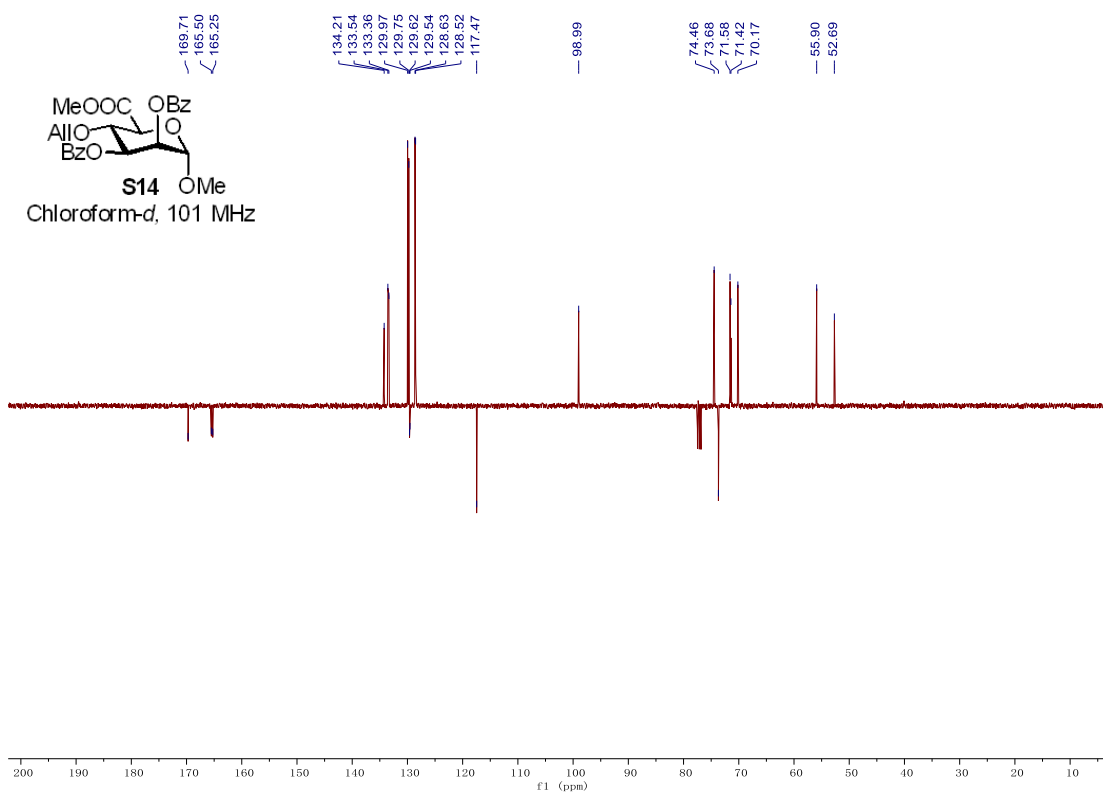

**<sup>13</sup>C NMR Spectra of compound S14**

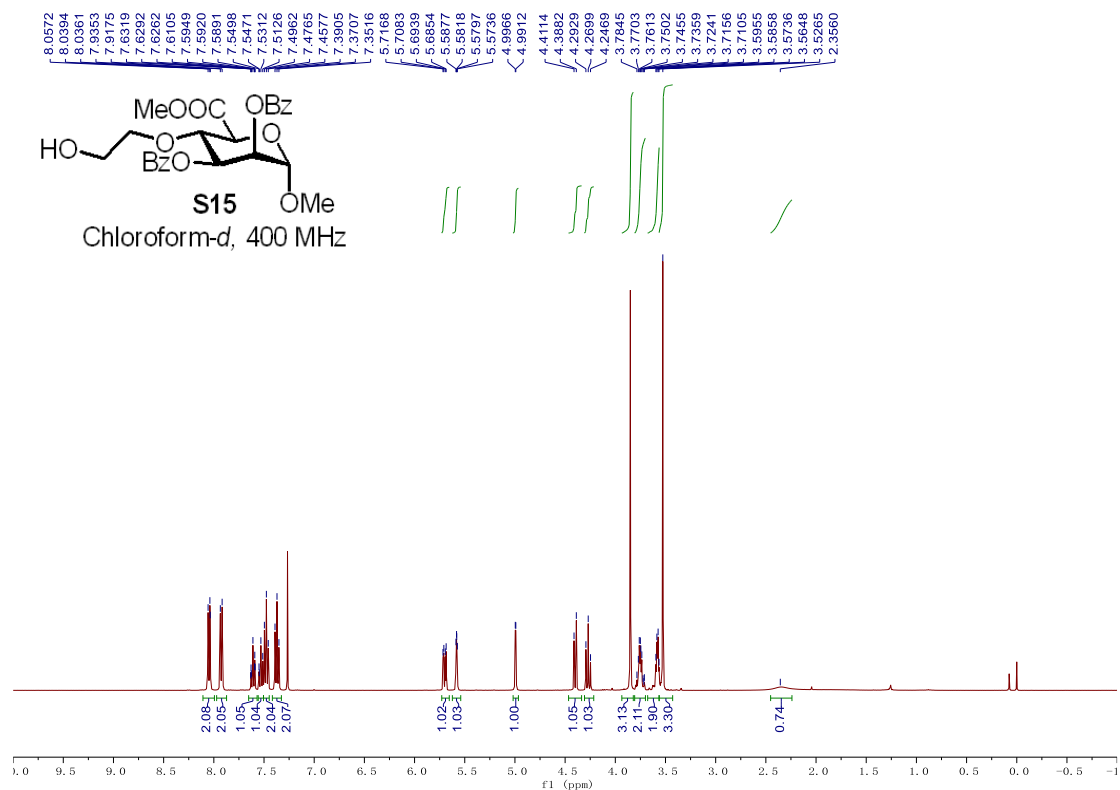

### $^1\text{H}$ NMR Spectra of compound S15

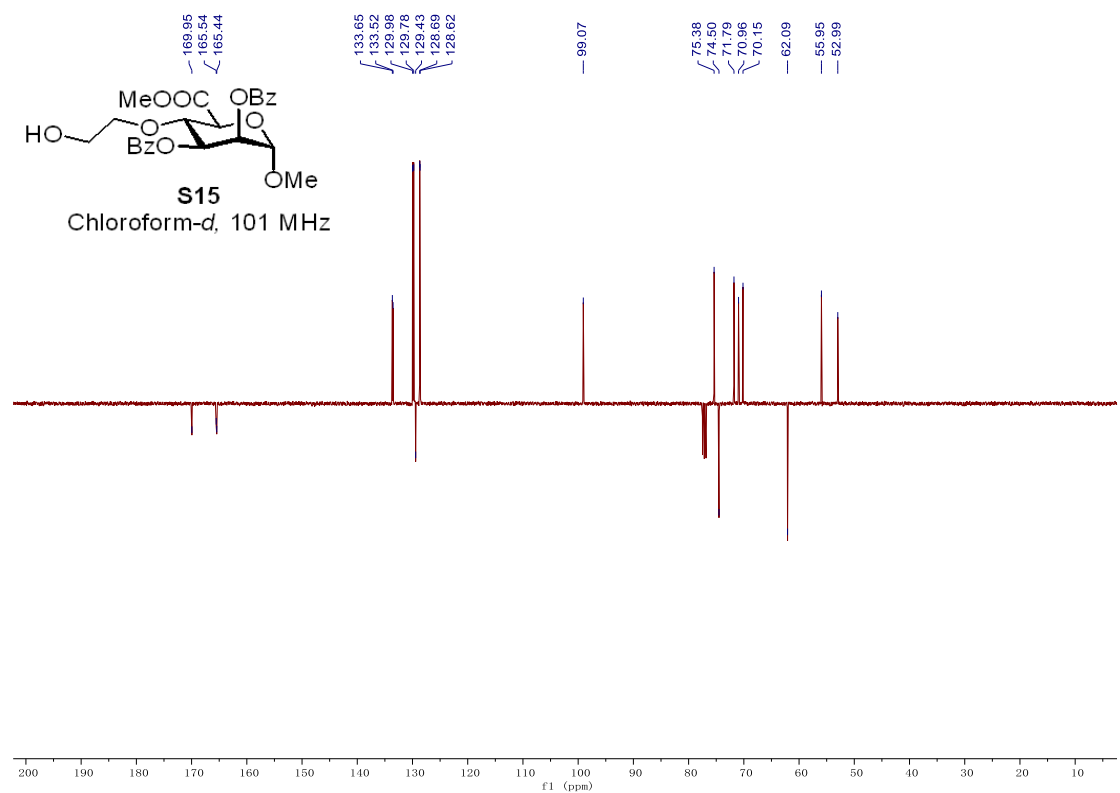

### $^{13}\text{C}$ NMR Spectra of compound S15

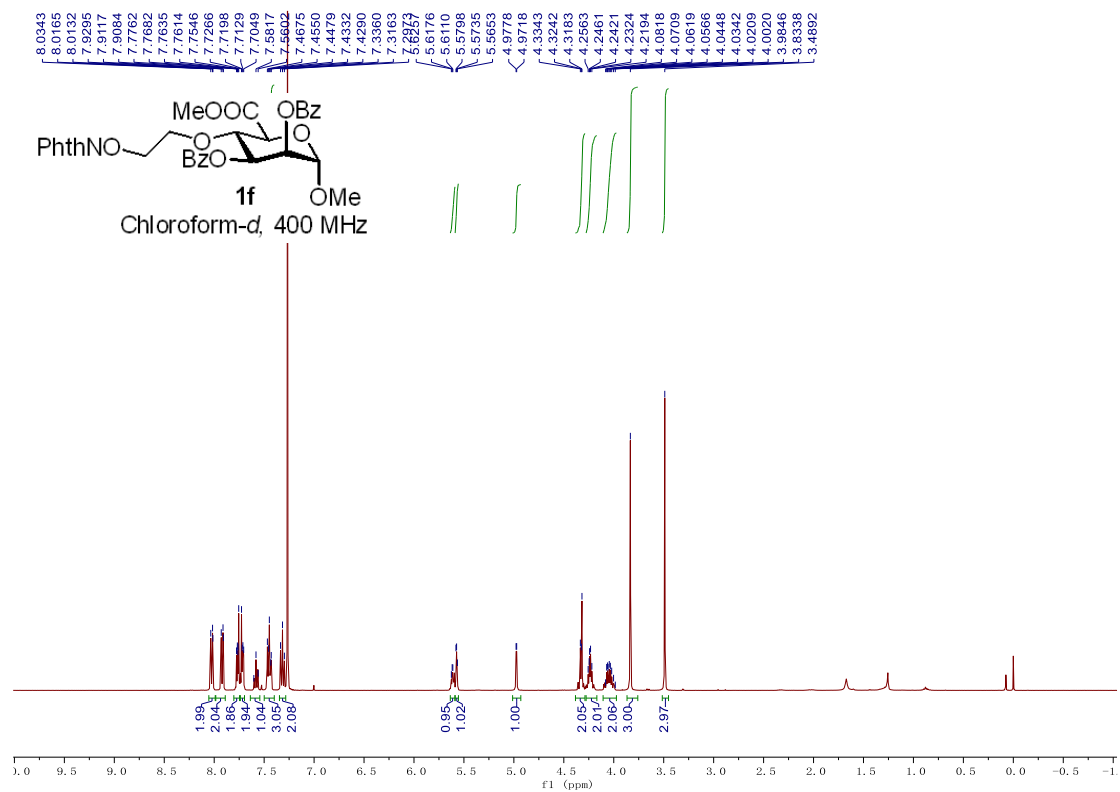

$^1\text{H}$  NMR Spectra of compound **1f**

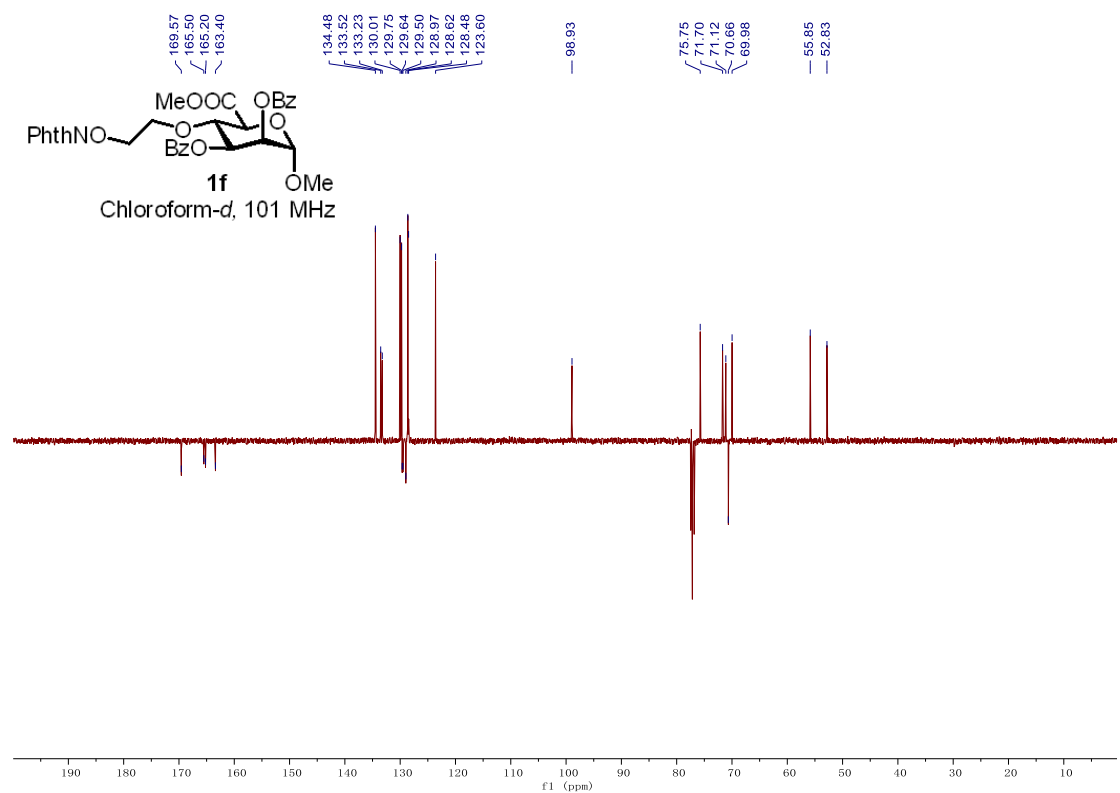

$^{13}\text{C}$  NMR Spectra of compound **1f**

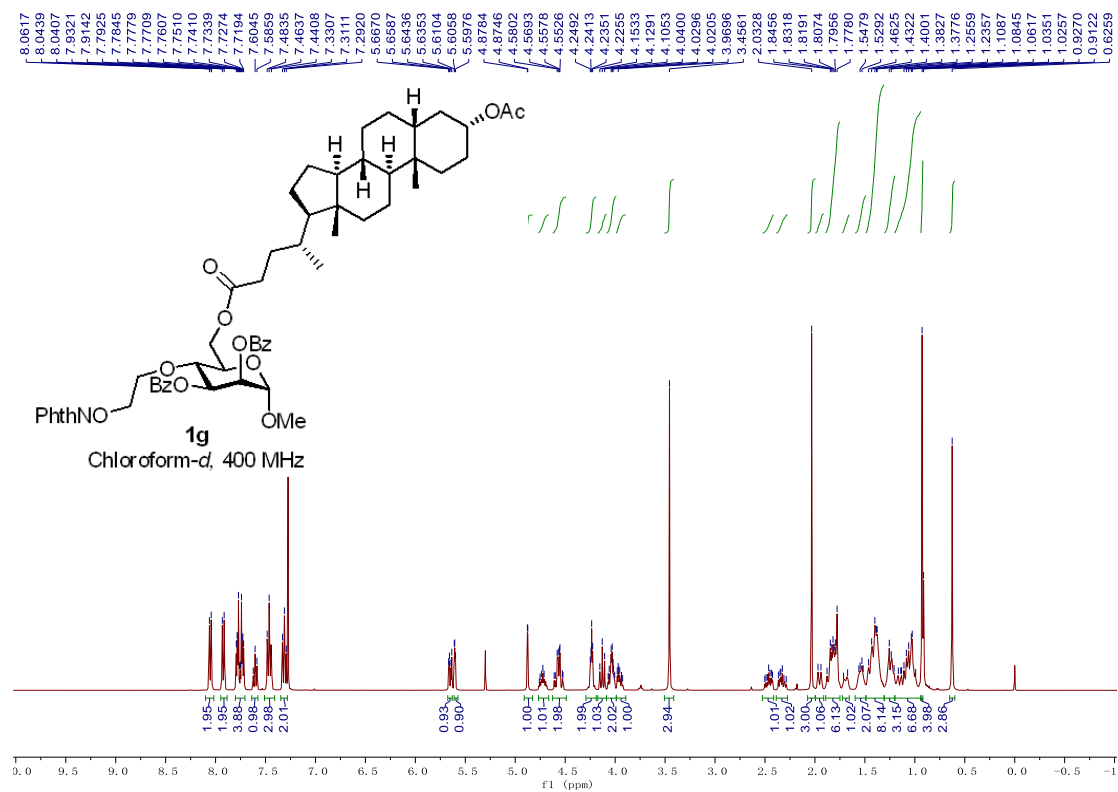

**<sup>1</sup>H NMR Spectra of compound 1g**

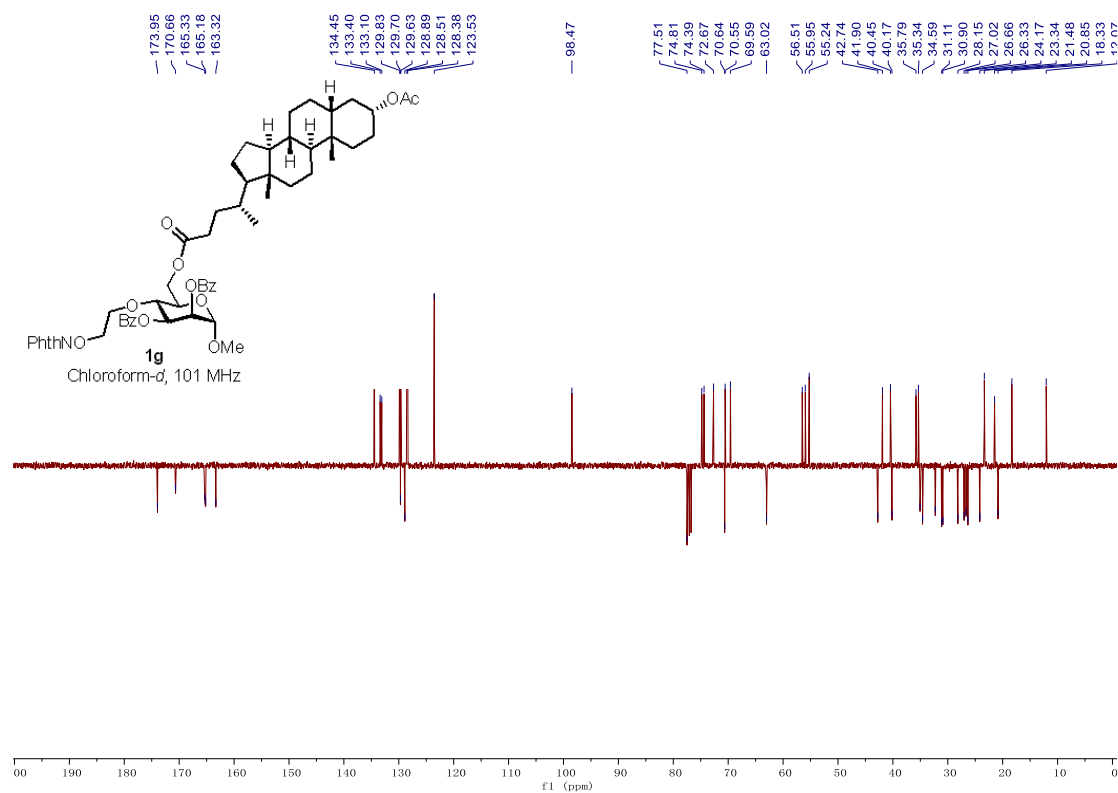

**<sup>13</sup>C NMR Spectra of compound 1g**

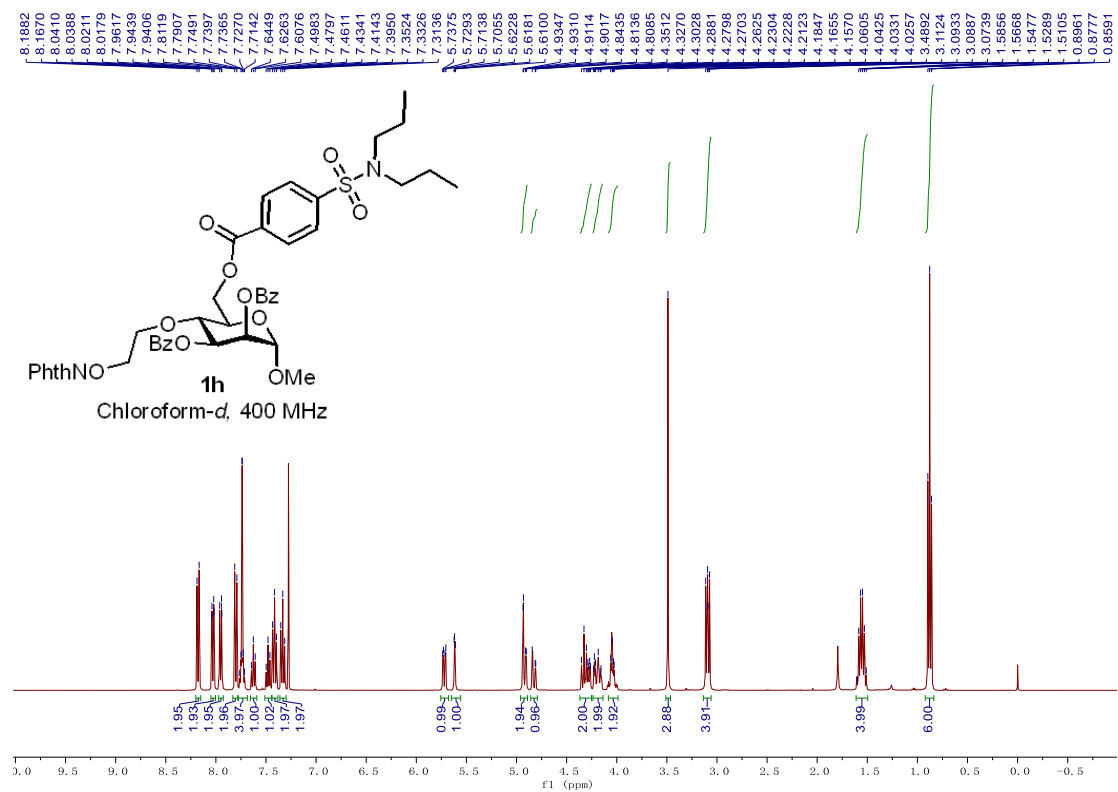

**<sup>1</sup>H NMR Spectra of compound 1h**

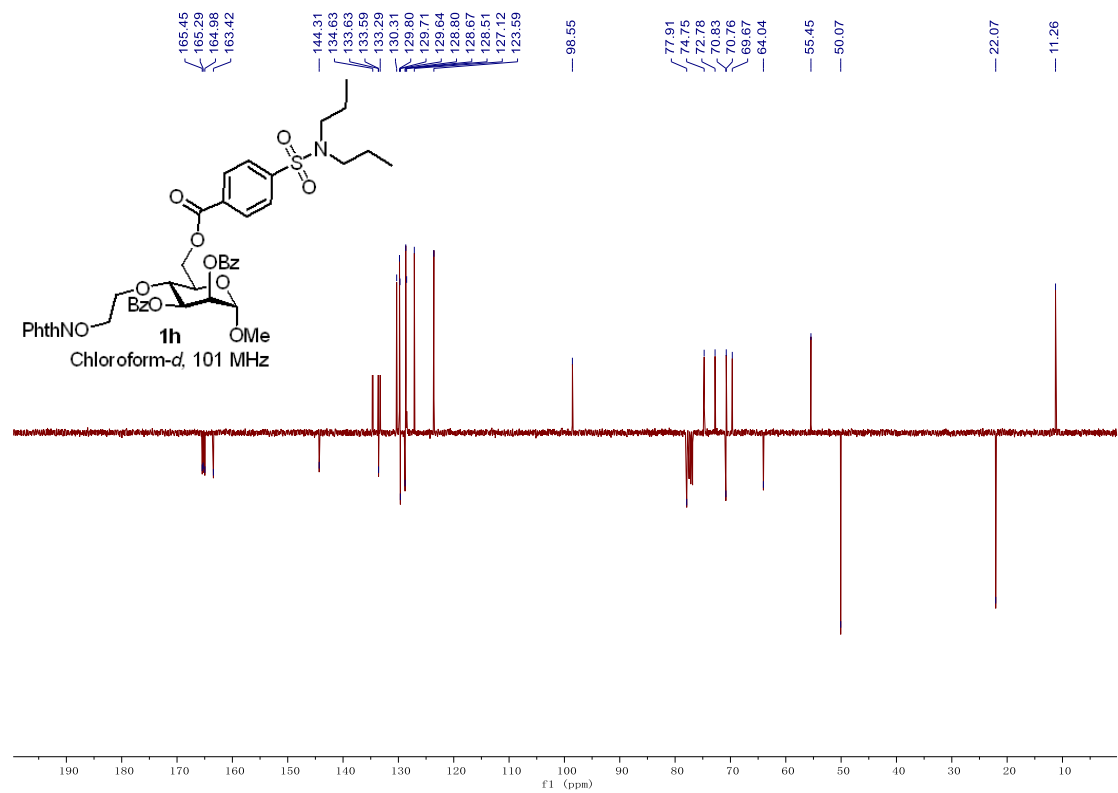

**<sup>13</sup>C NMR Spectra of compound 1h**



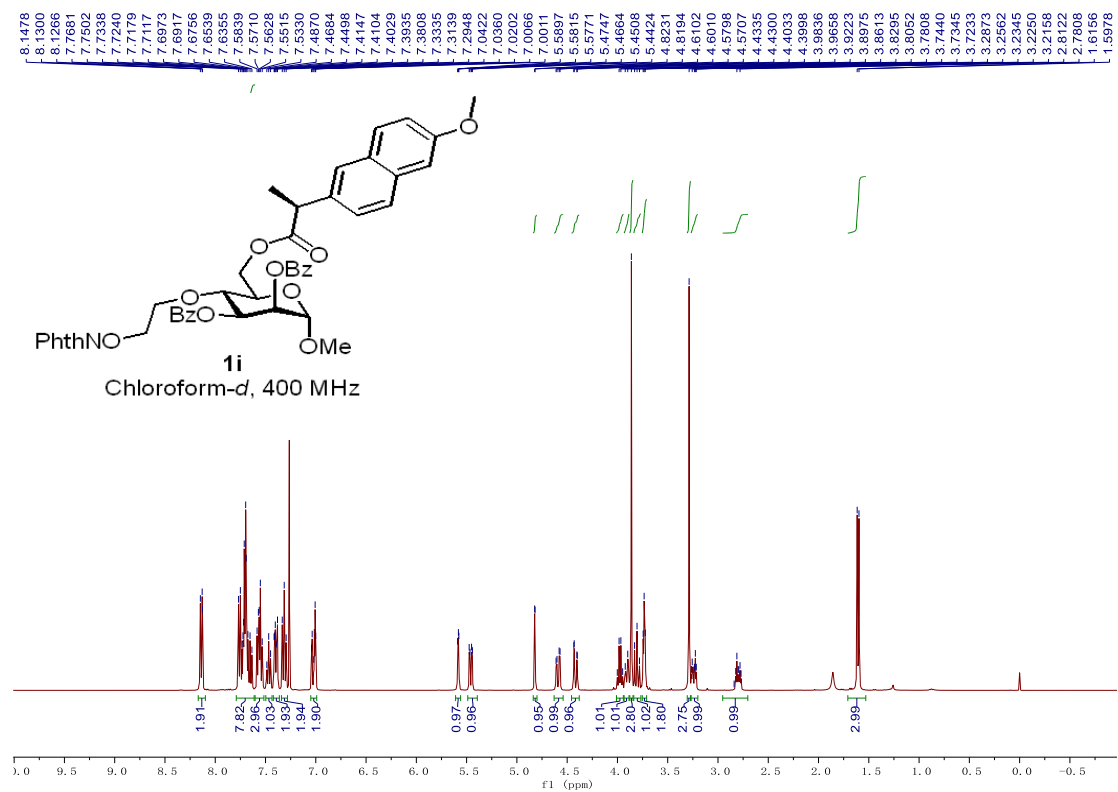

**<sup>1</sup>H NMR Spectra of compound 1i**

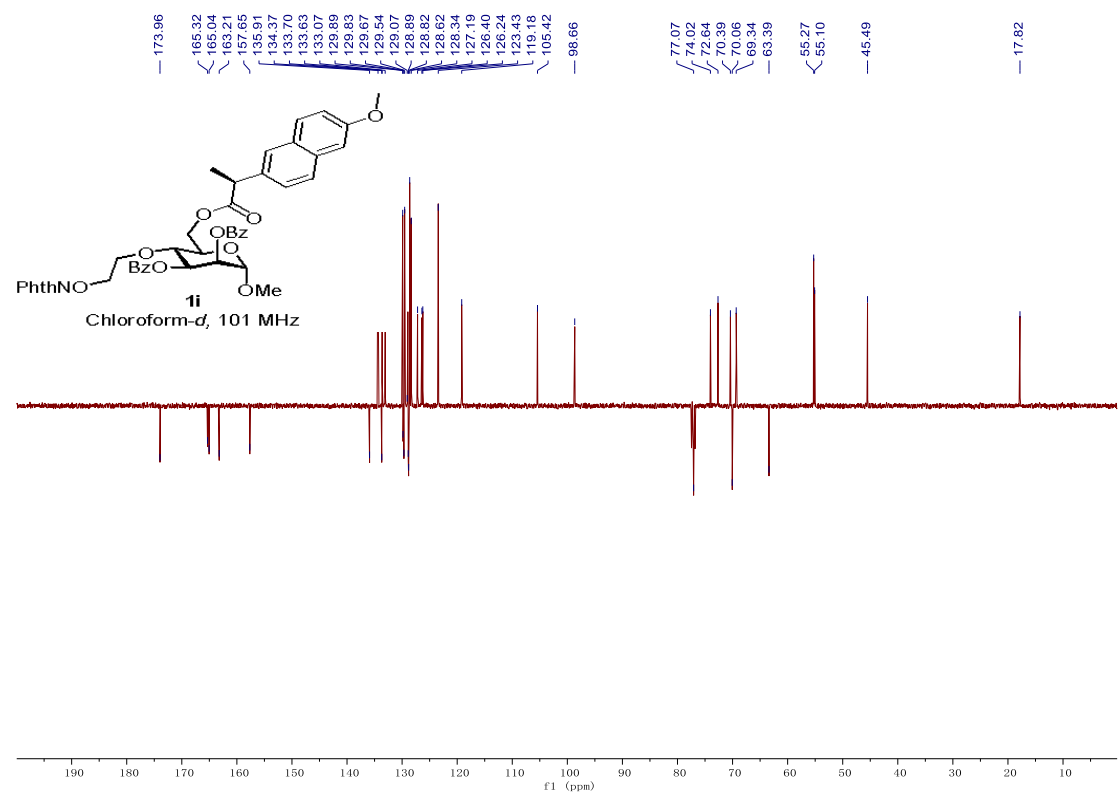

**<sup>13</sup>C NMR Spectra of compound 1i**

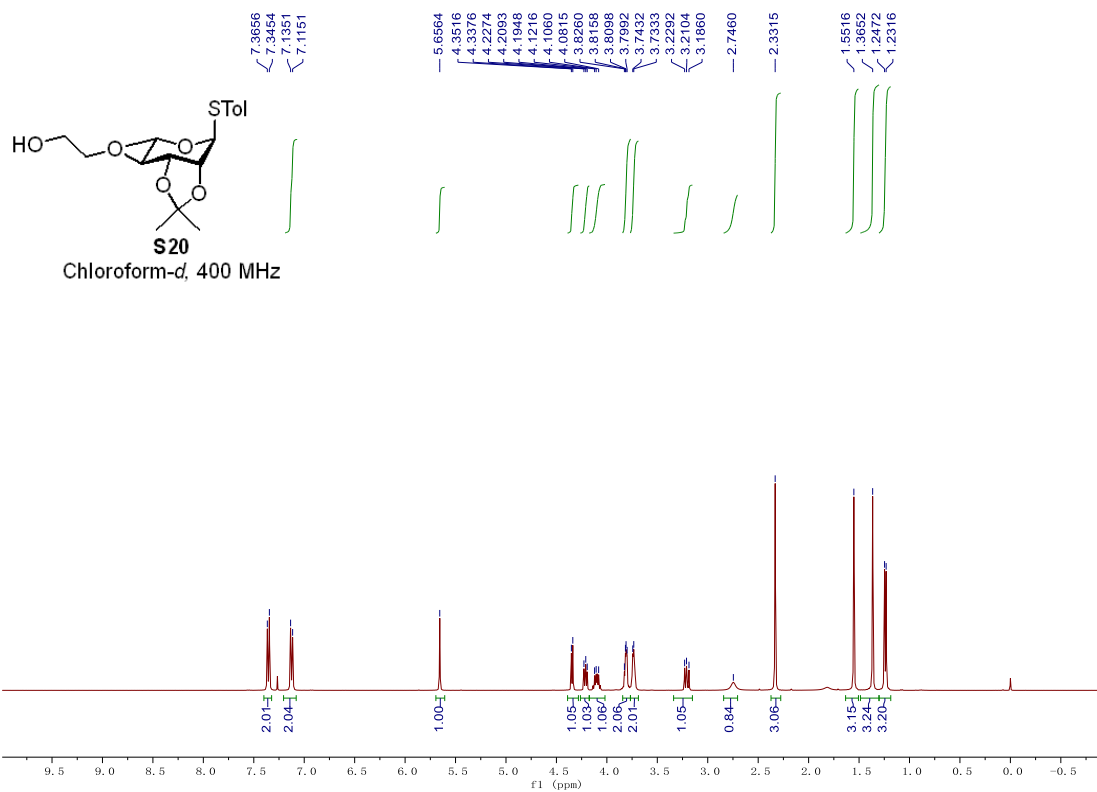

### <sup>1</sup>H NMR Spectra of compound S20

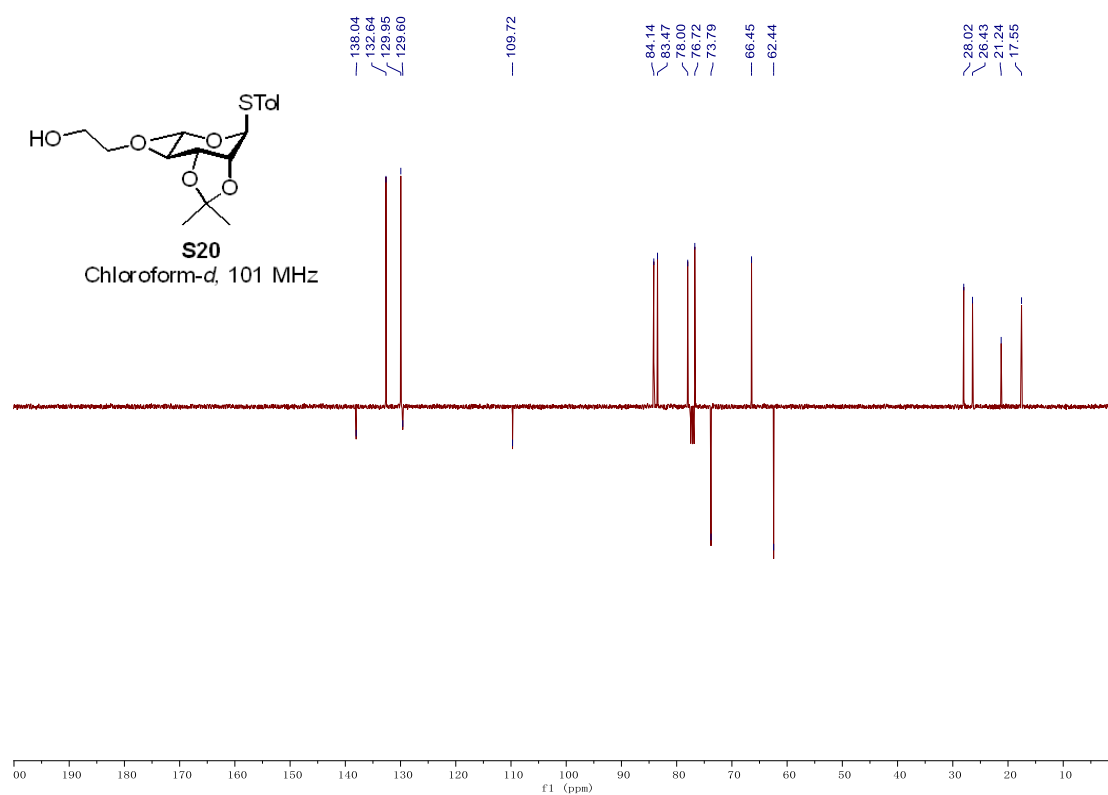

### <sup>13</sup>C NMR Spectra of compound S20

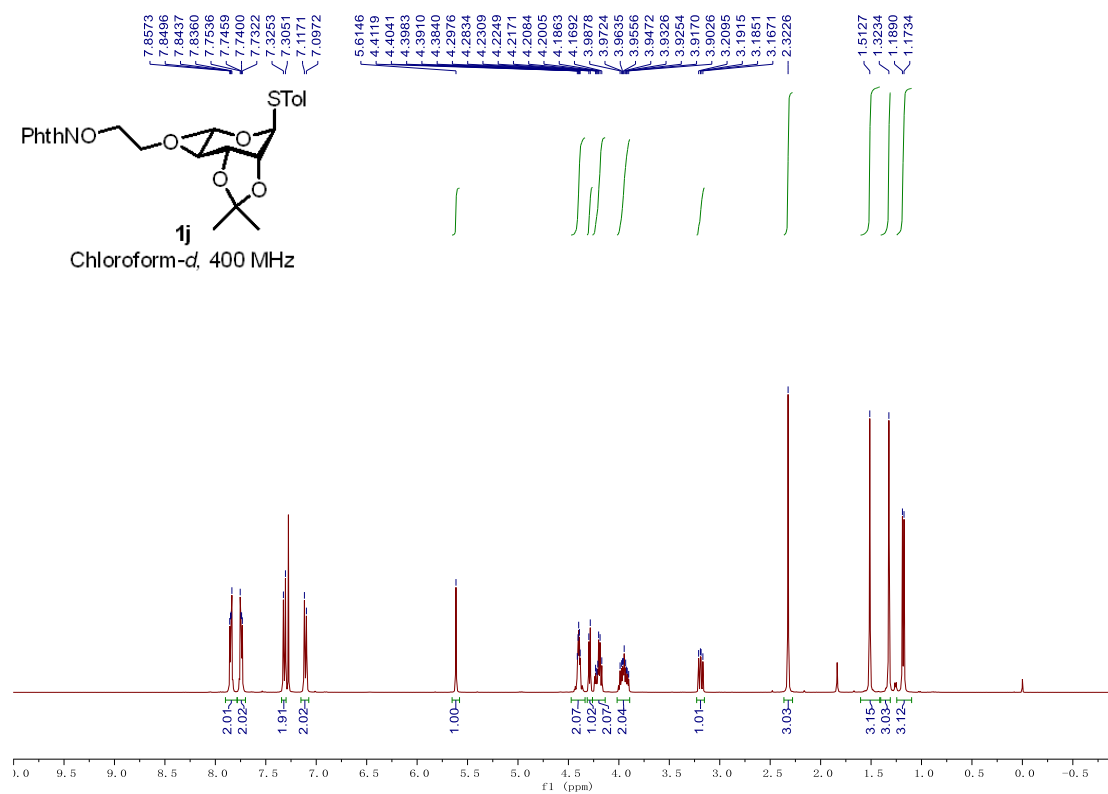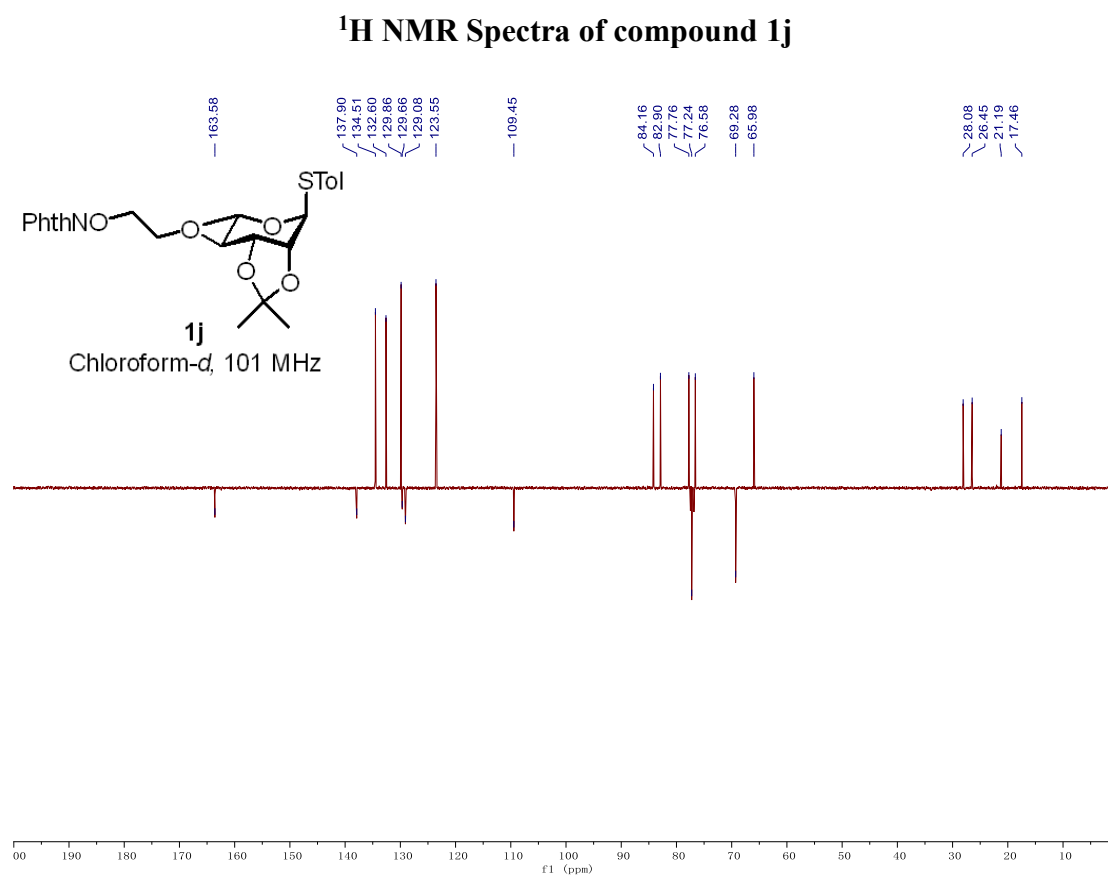

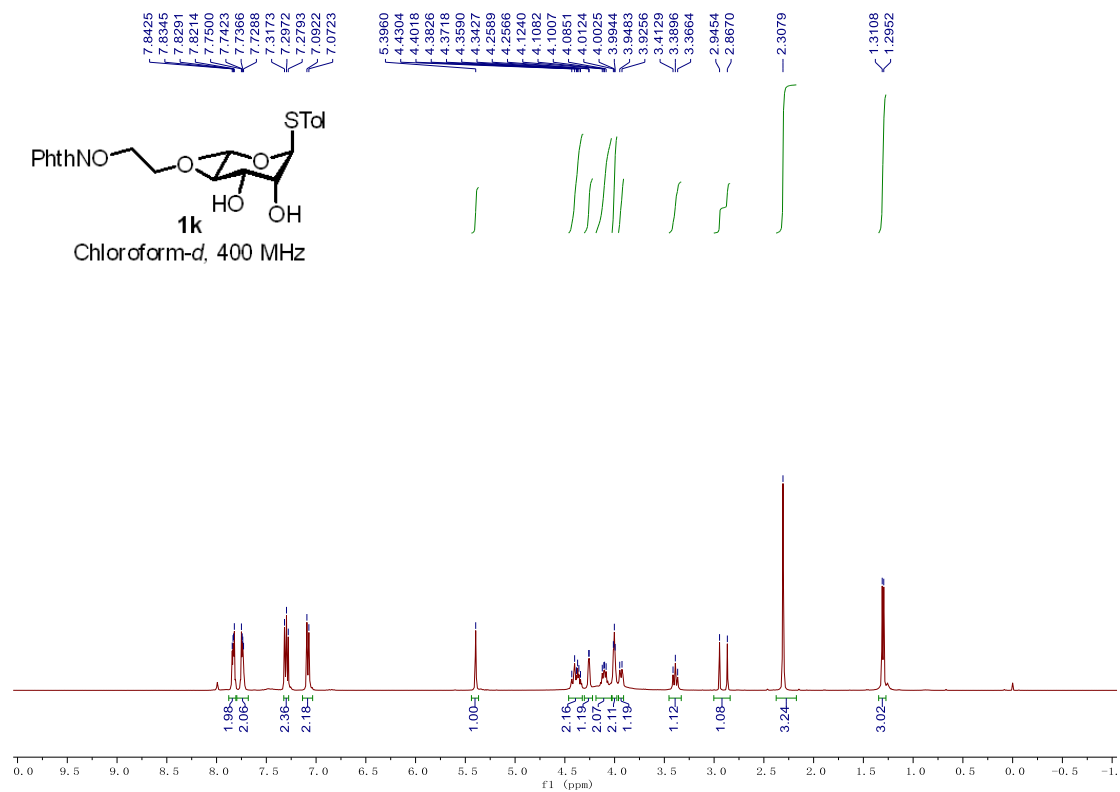

**<sup>1</sup>H NMR Spectra of compound 1k**

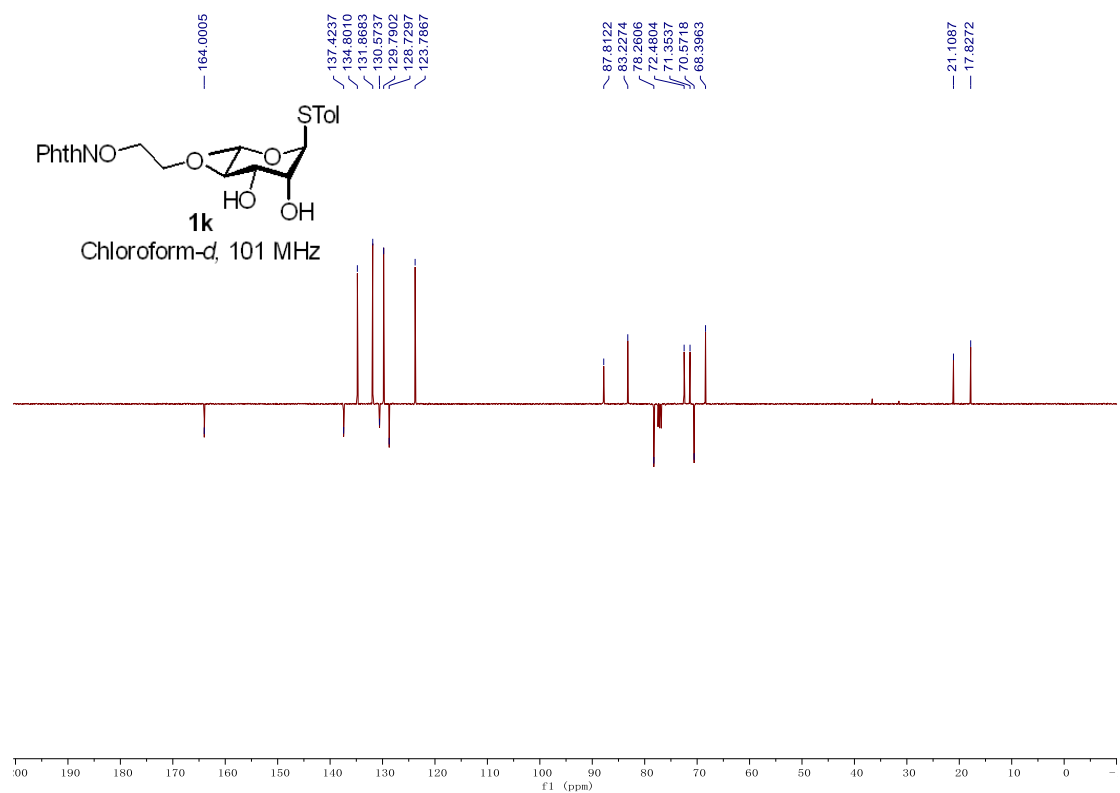

**<sup>13</sup>C NMR Spectra of compound 1k**

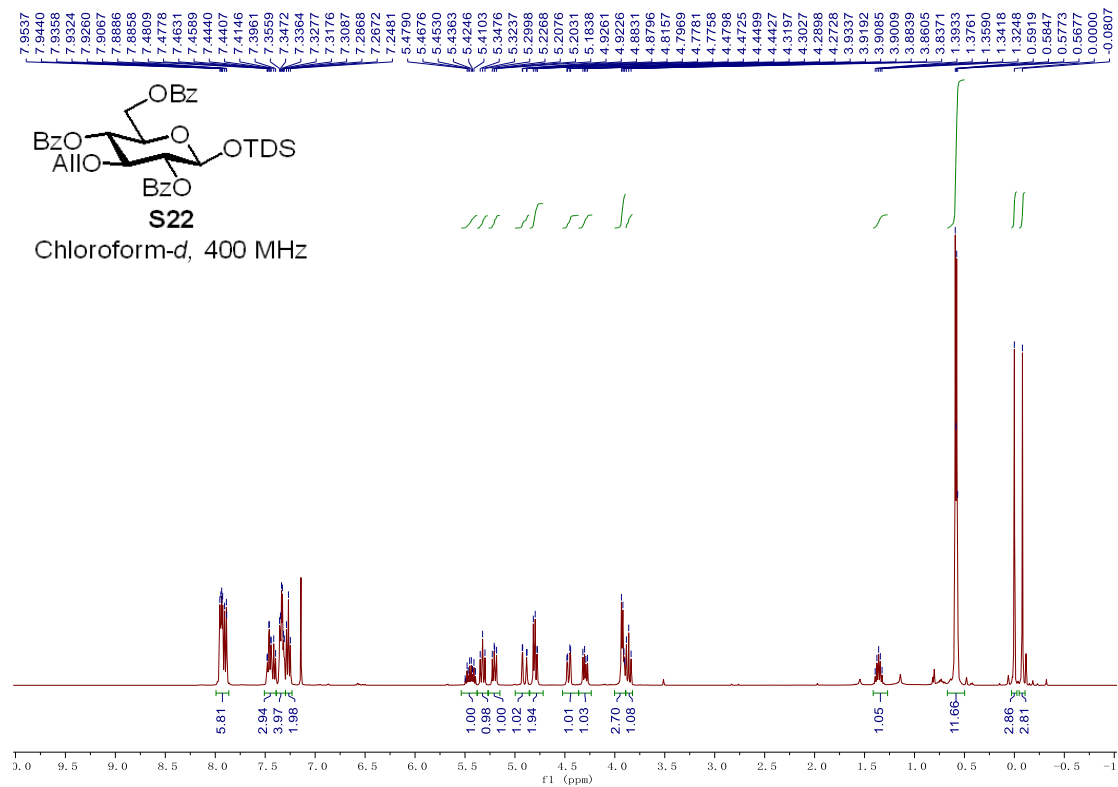

**<sup>1</sup>H NMR Spectra of compound S22**

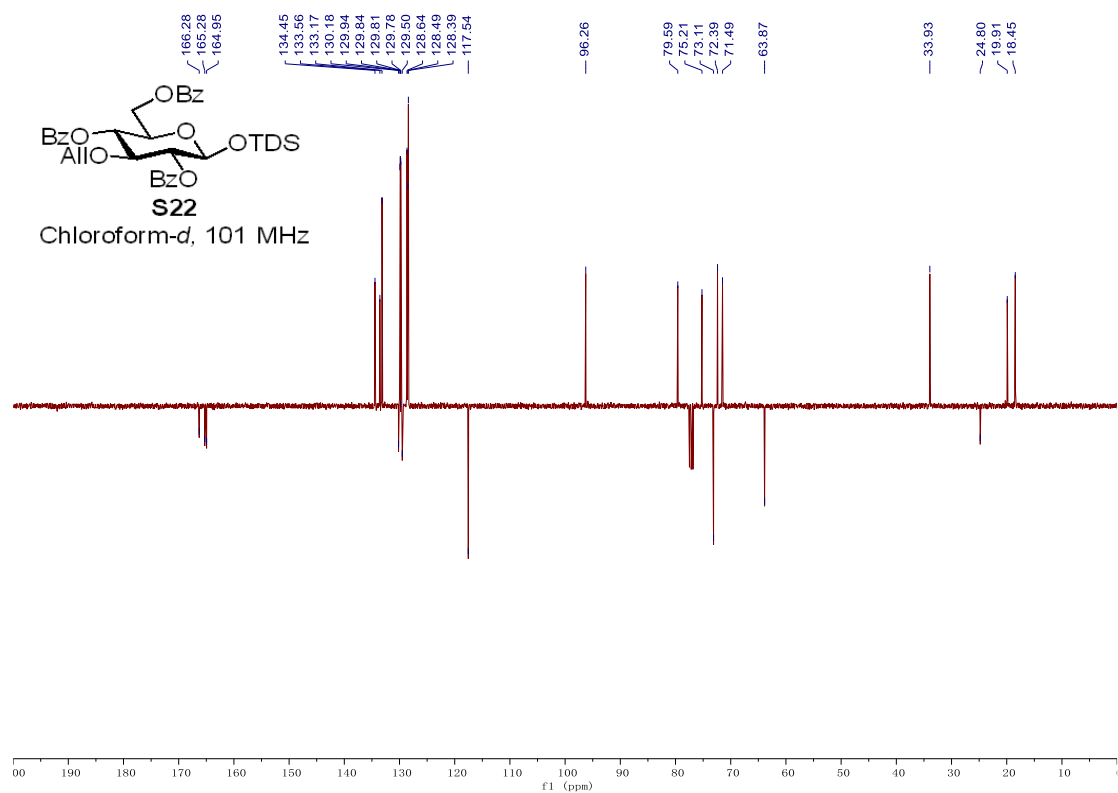

**<sup>13</sup>C NMR Spectra of compound S22**

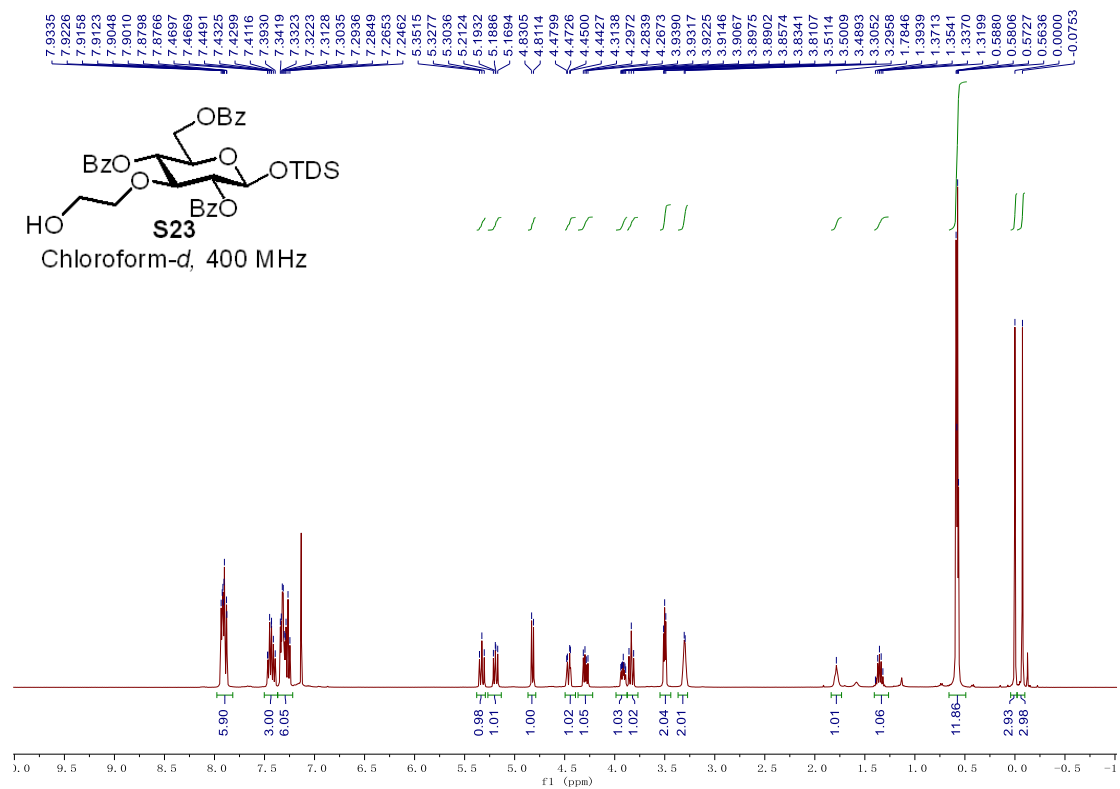

### <sup>1</sup>H NMR Spectra of compound S23

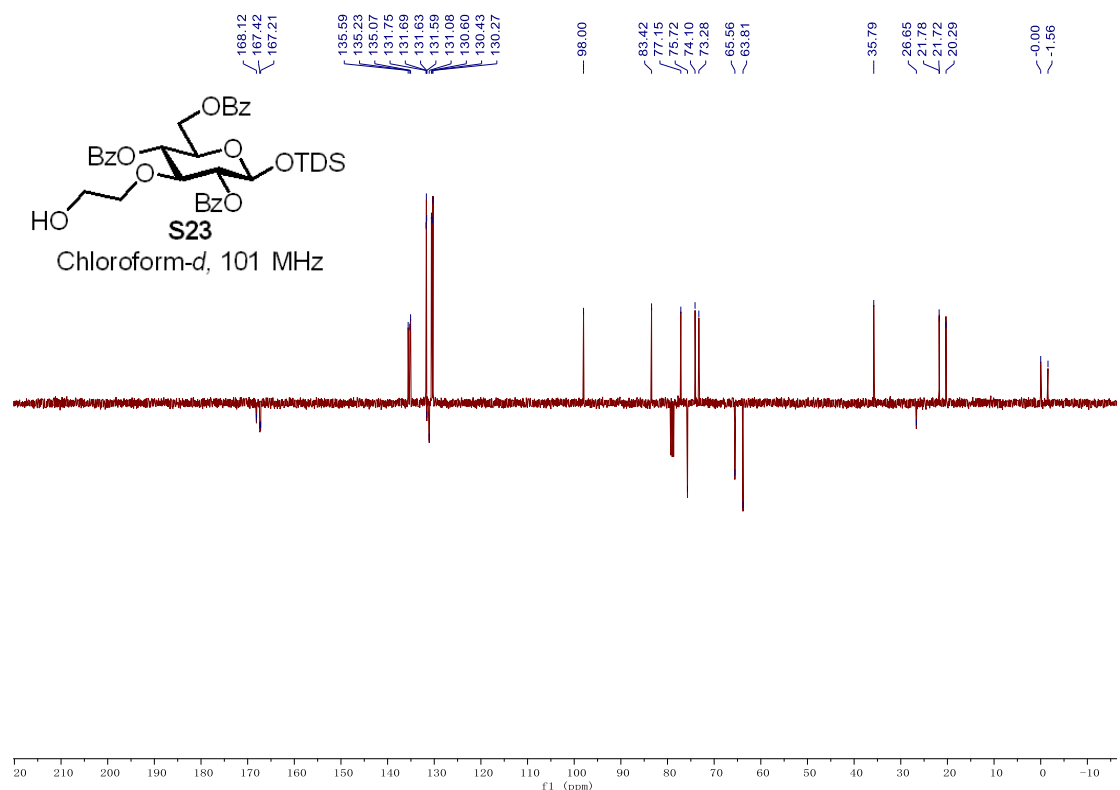

### <sup>13</sup>C NMR Spectra of compound S23

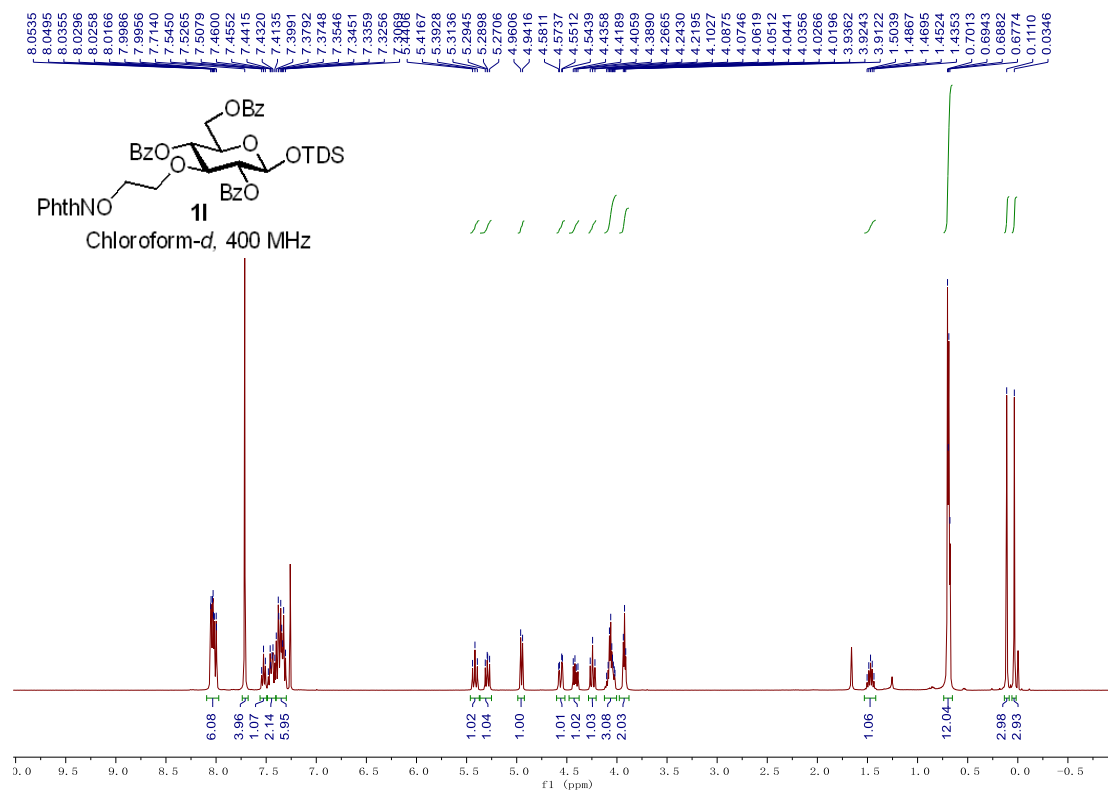

**<sup>1</sup>H NMR Spectra of compound 11**

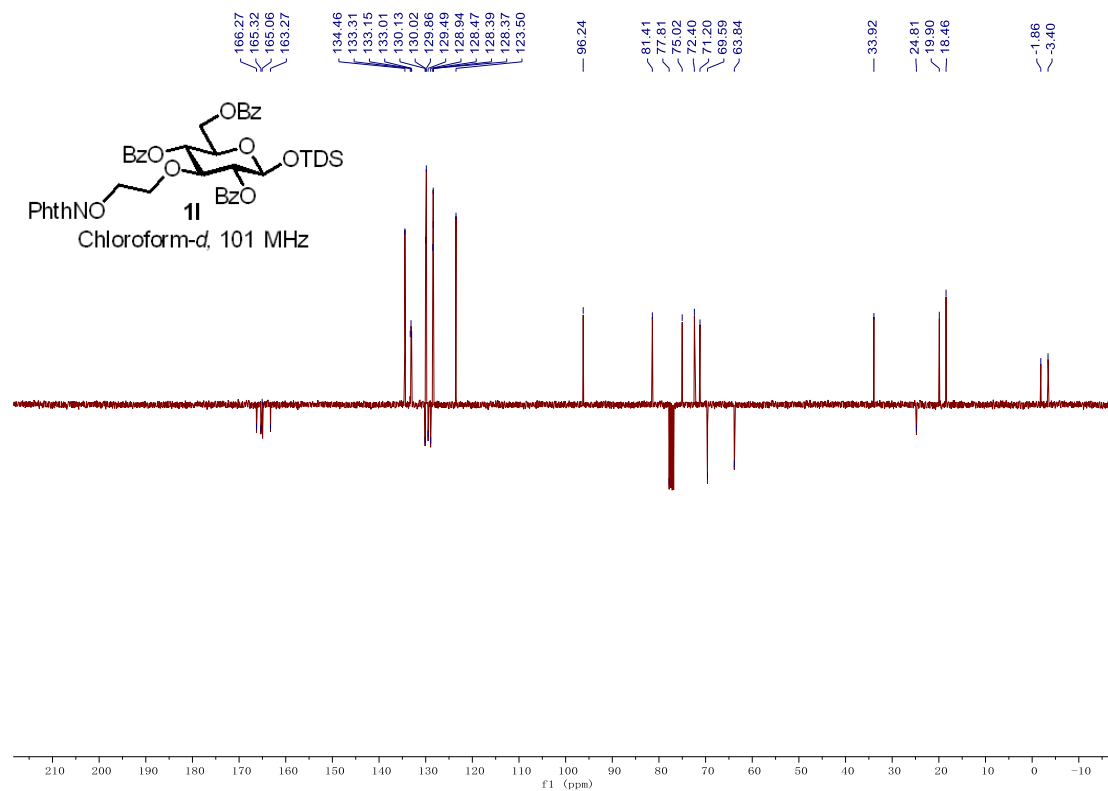

**<sup>13</sup>C NMR Spectra of compound 11**

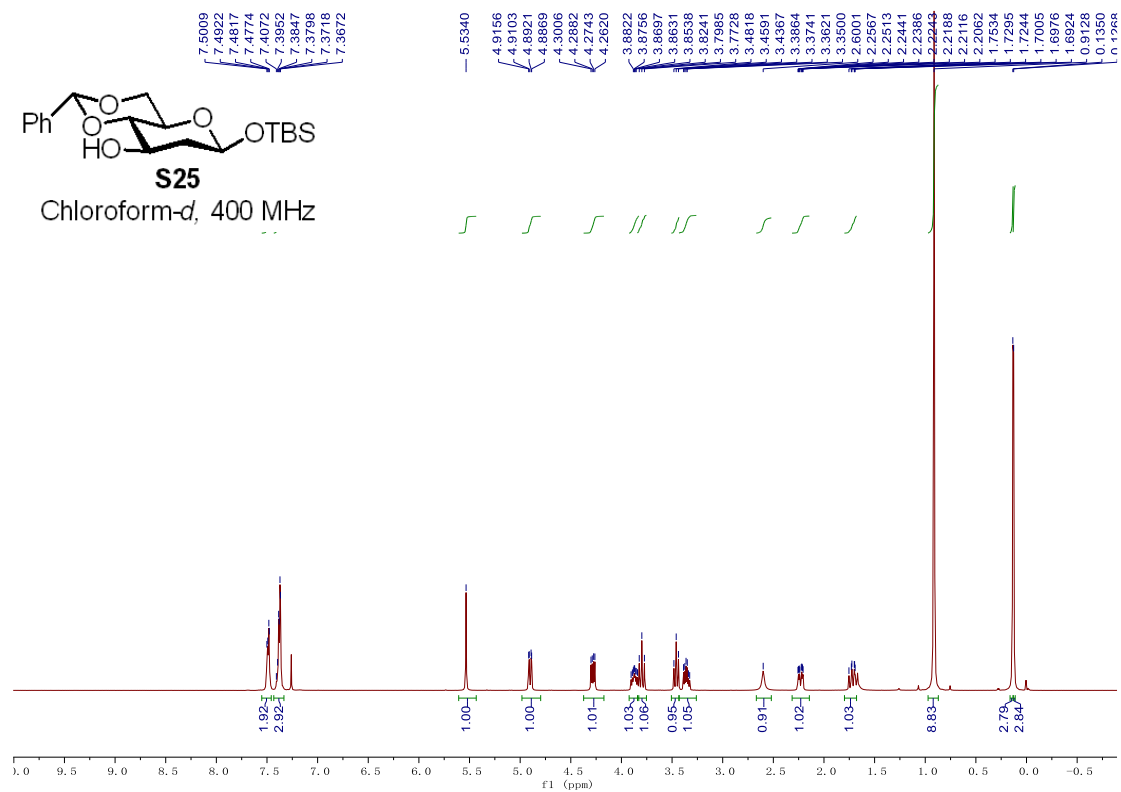

### <sup>1</sup>H NMR Spectra of compound S25

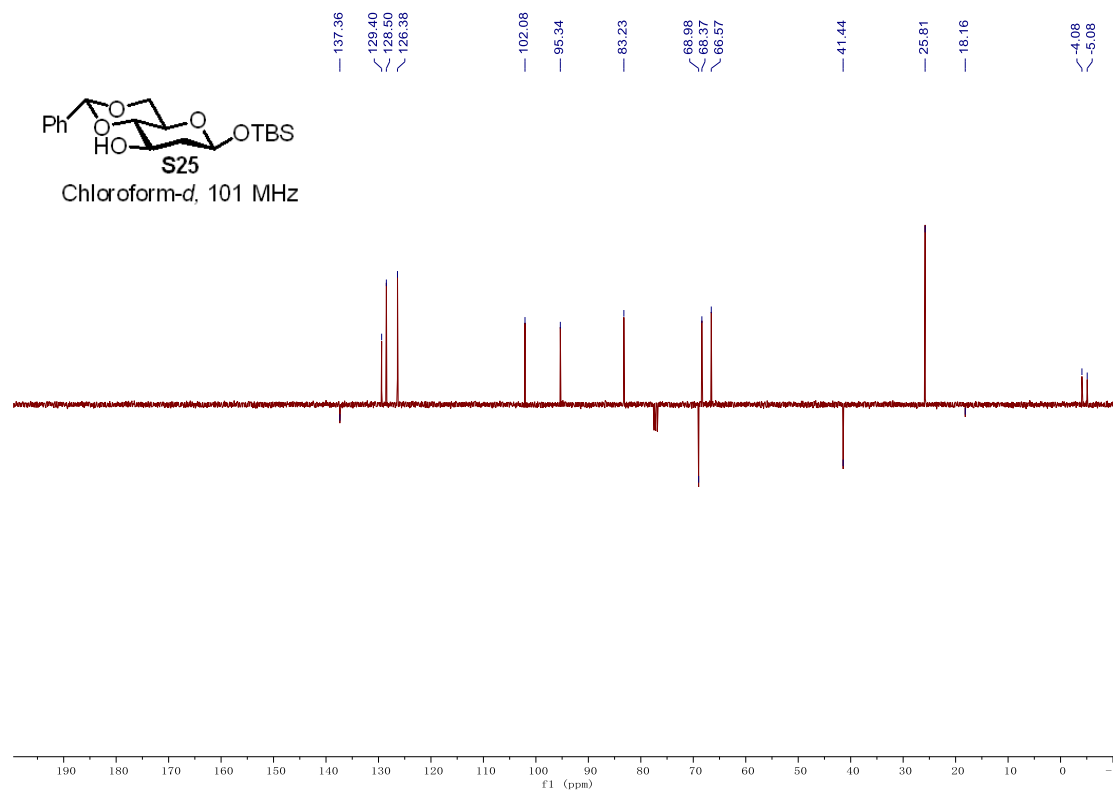

### <sup>13</sup>C NMR Spectra of compound S25



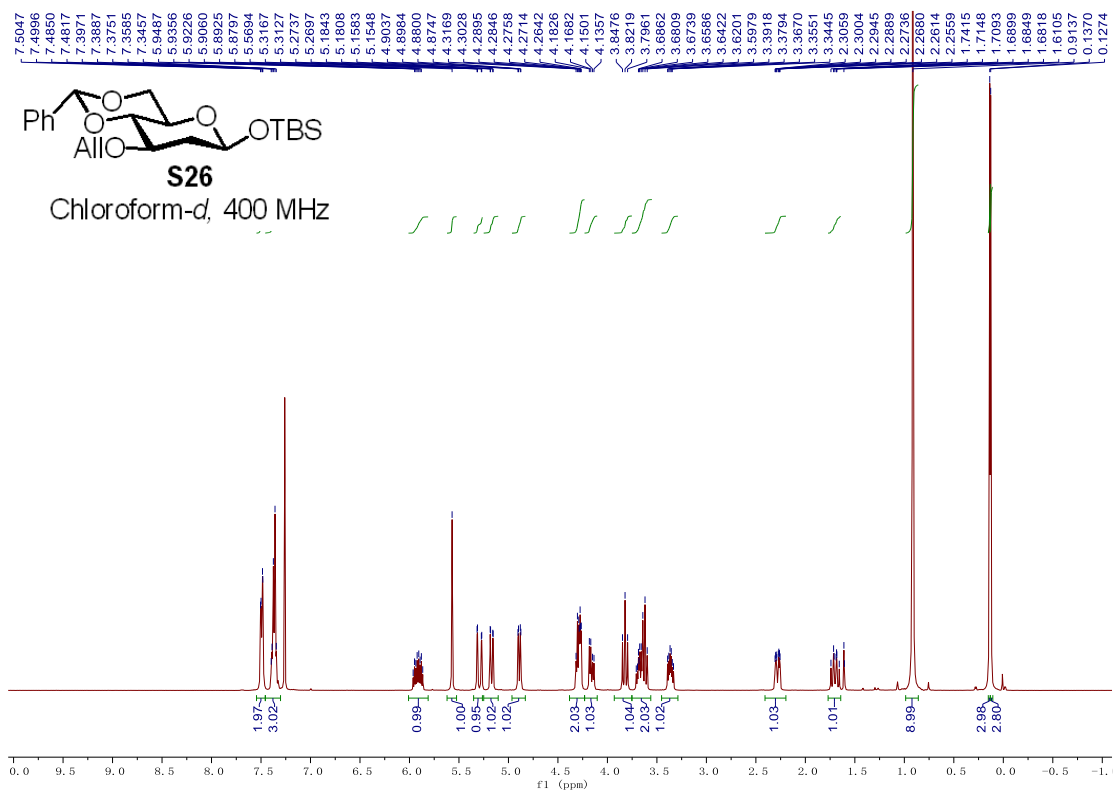

**<sup>1</sup>H NMR Spectra of compound S26**

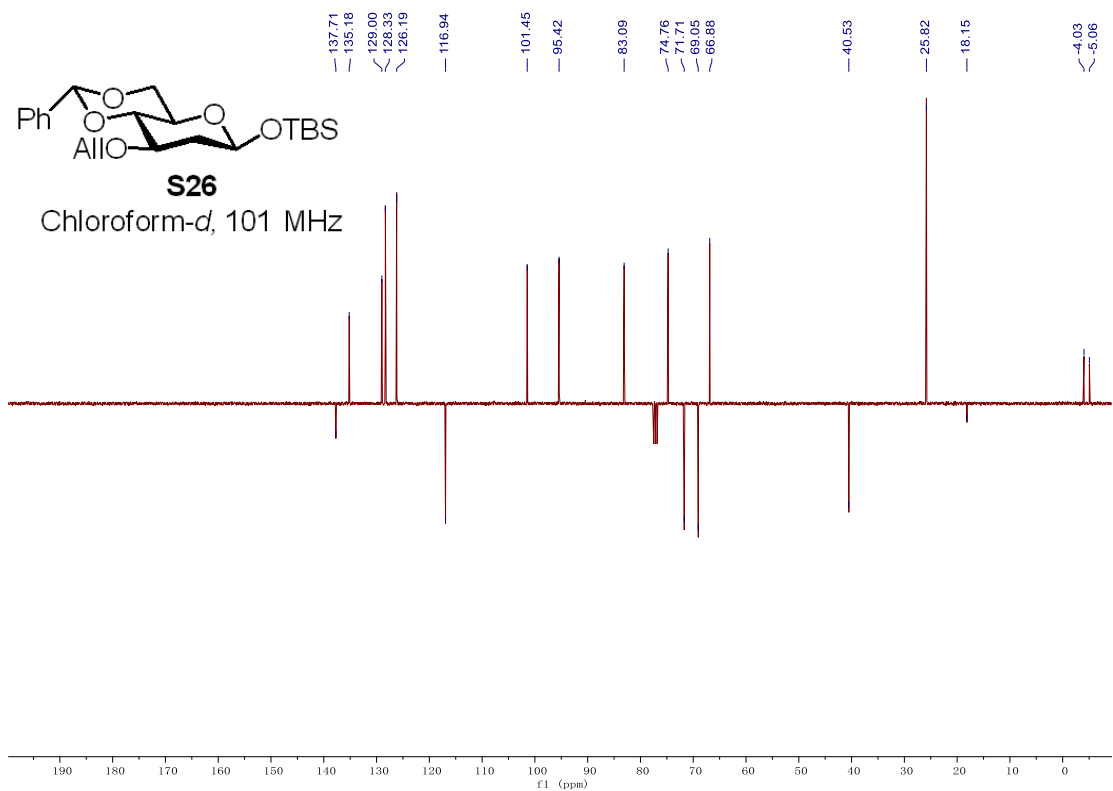

**<sup>13</sup>C NMR Spectra of compound S26**

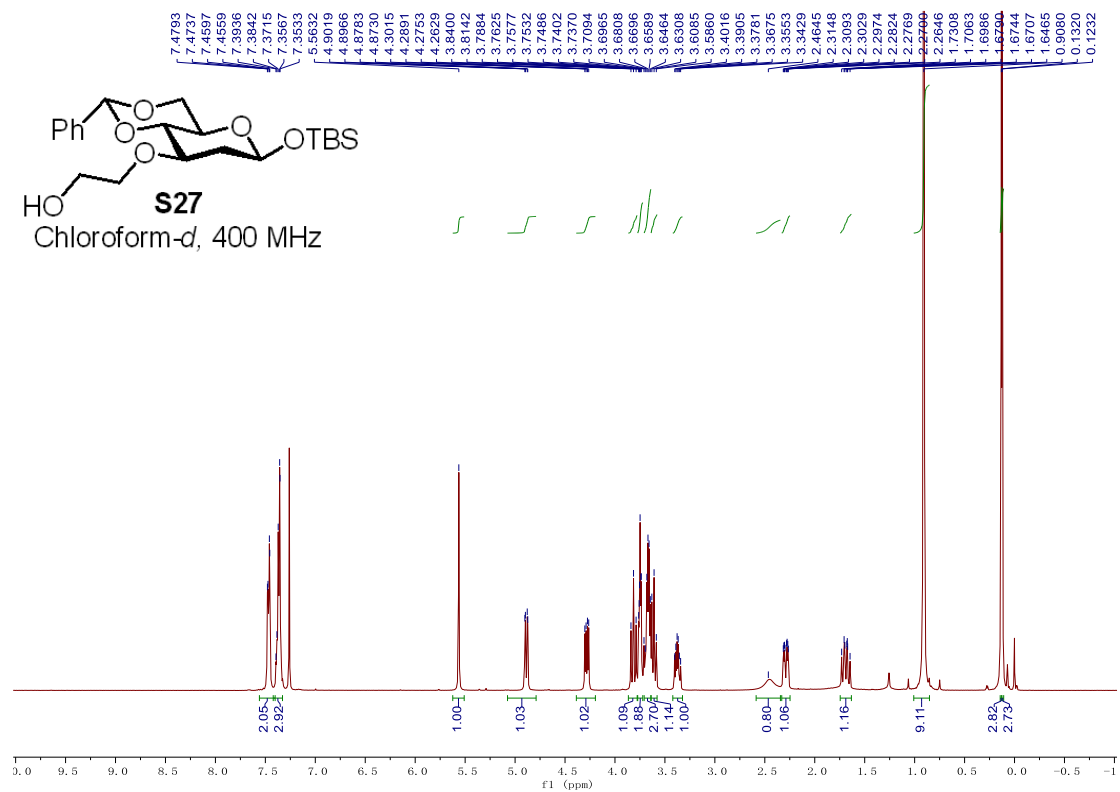

### <sup>1</sup>H NMR Spectra of compound S27

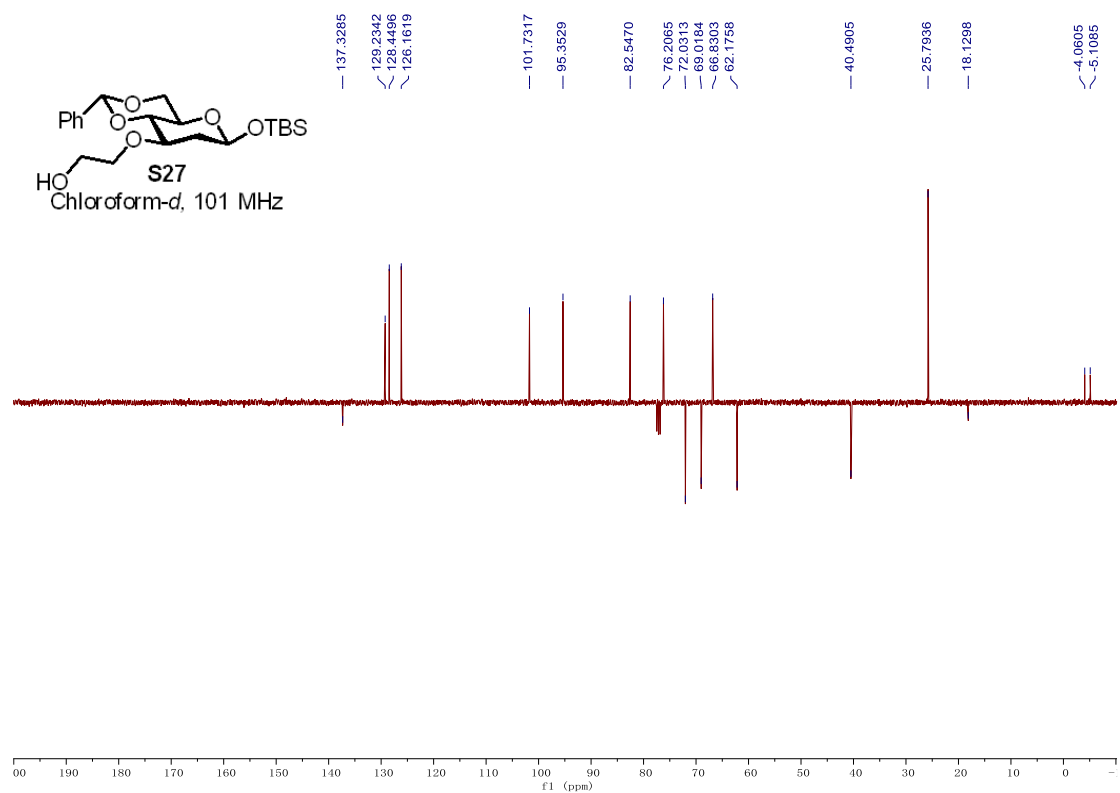

### <sup>13</sup>C NMR Spectra of compound S27

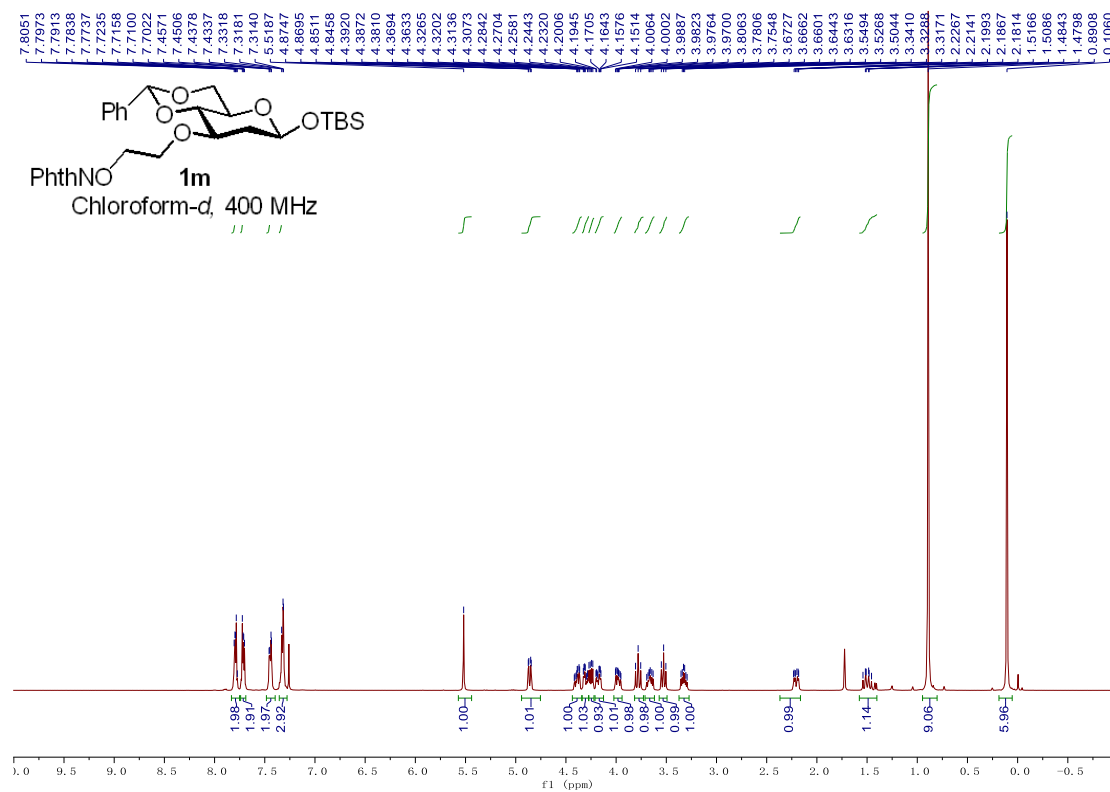

**<sup>1</sup>H NMR Spectra of compound 1m**

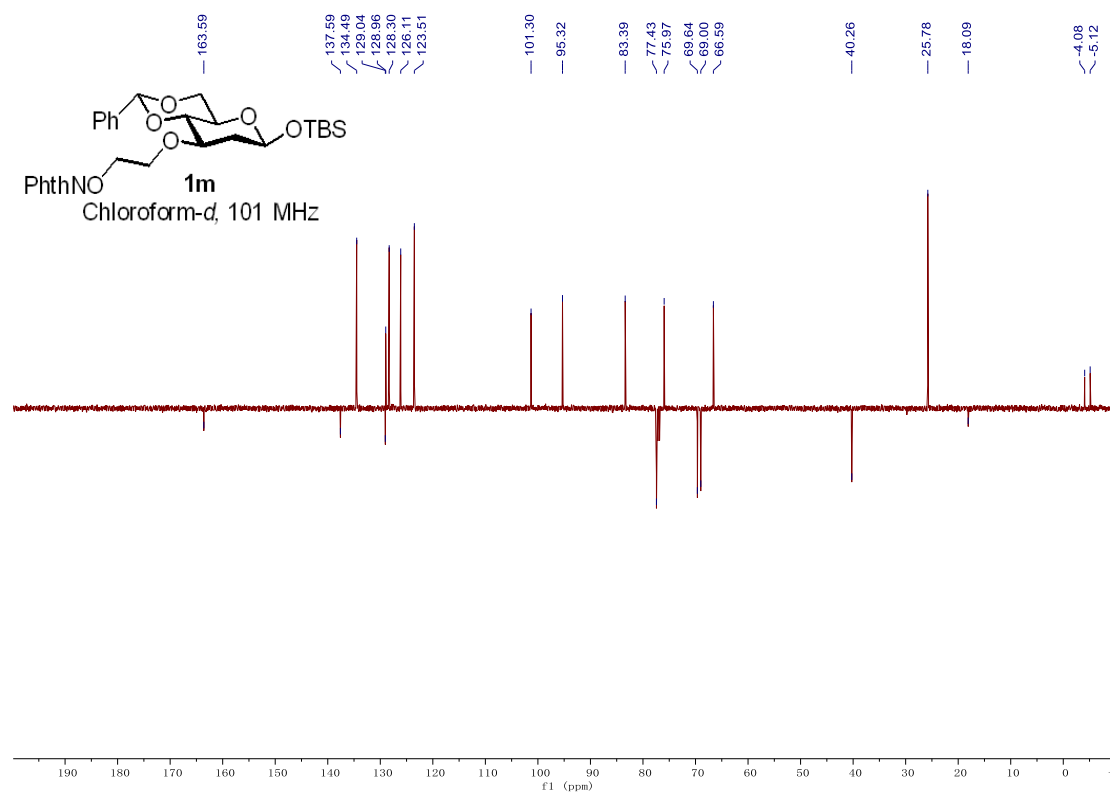

**<sup>13</sup>C NMR Spectra of compound 1m**

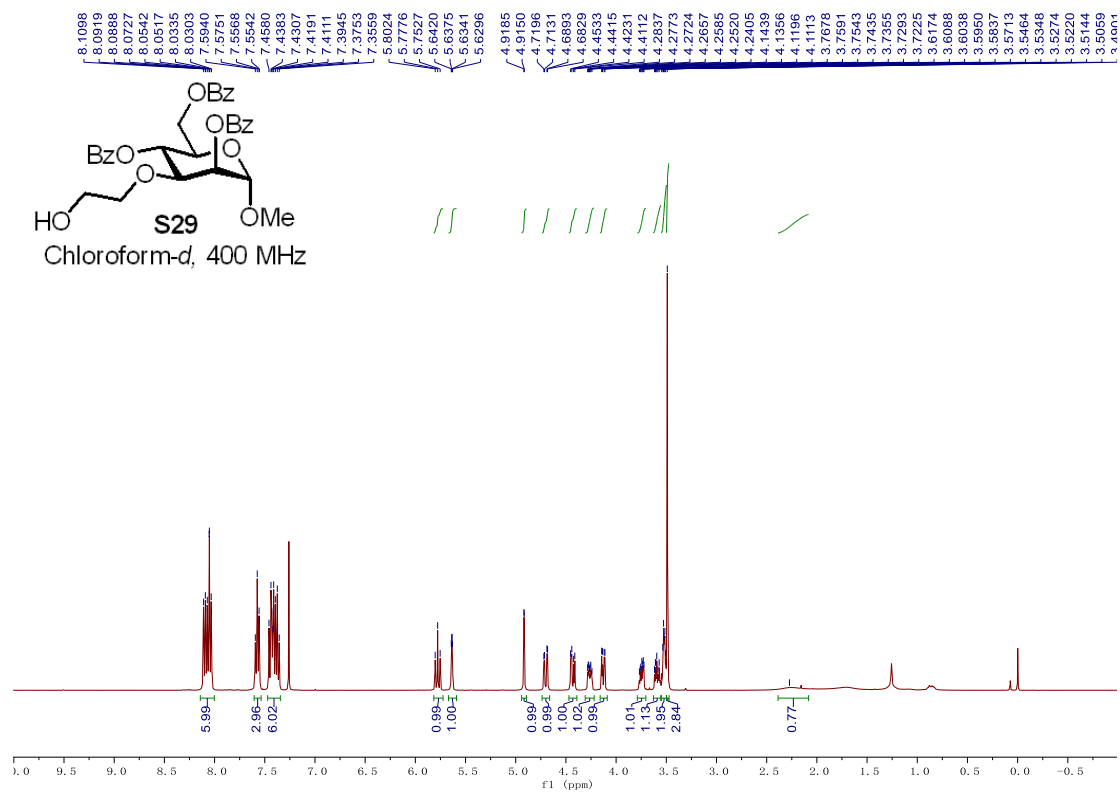

**<sup>1</sup>H NMR Spectra of compound S29**

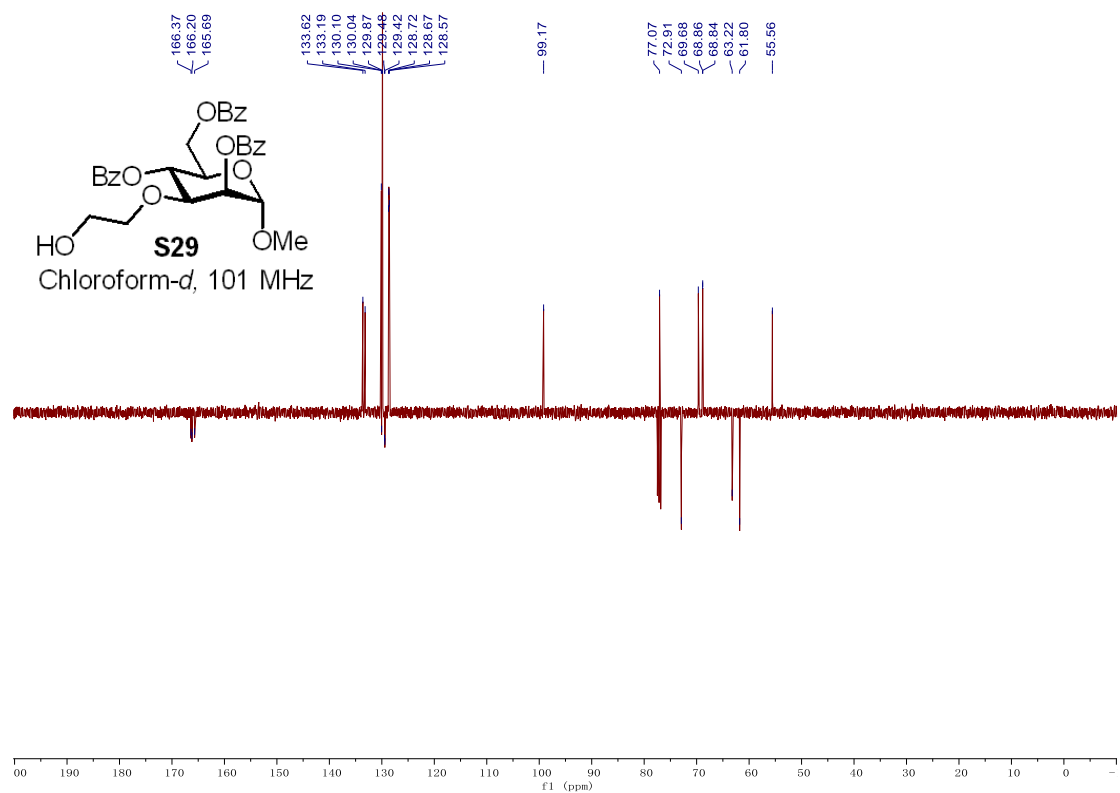

**<sup>13</sup>C NMR Spectra of compound S29**

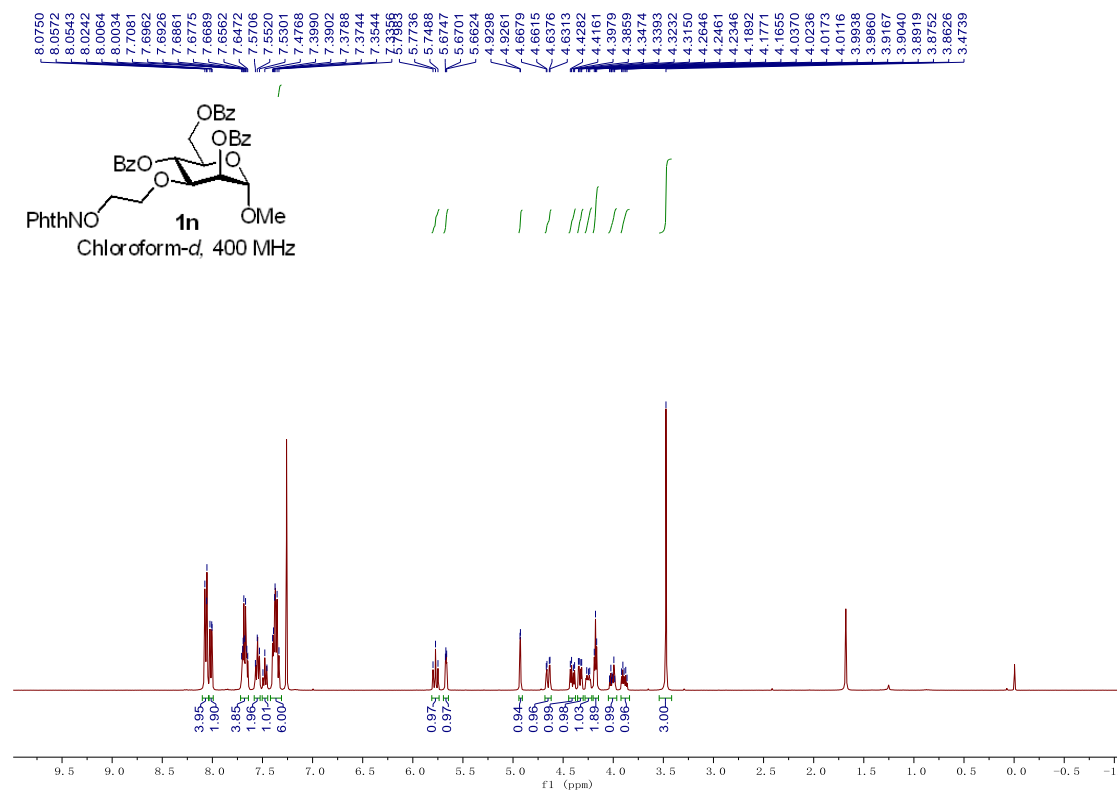

**<sup>1</sup>H NMR Spectra of compound 1n**

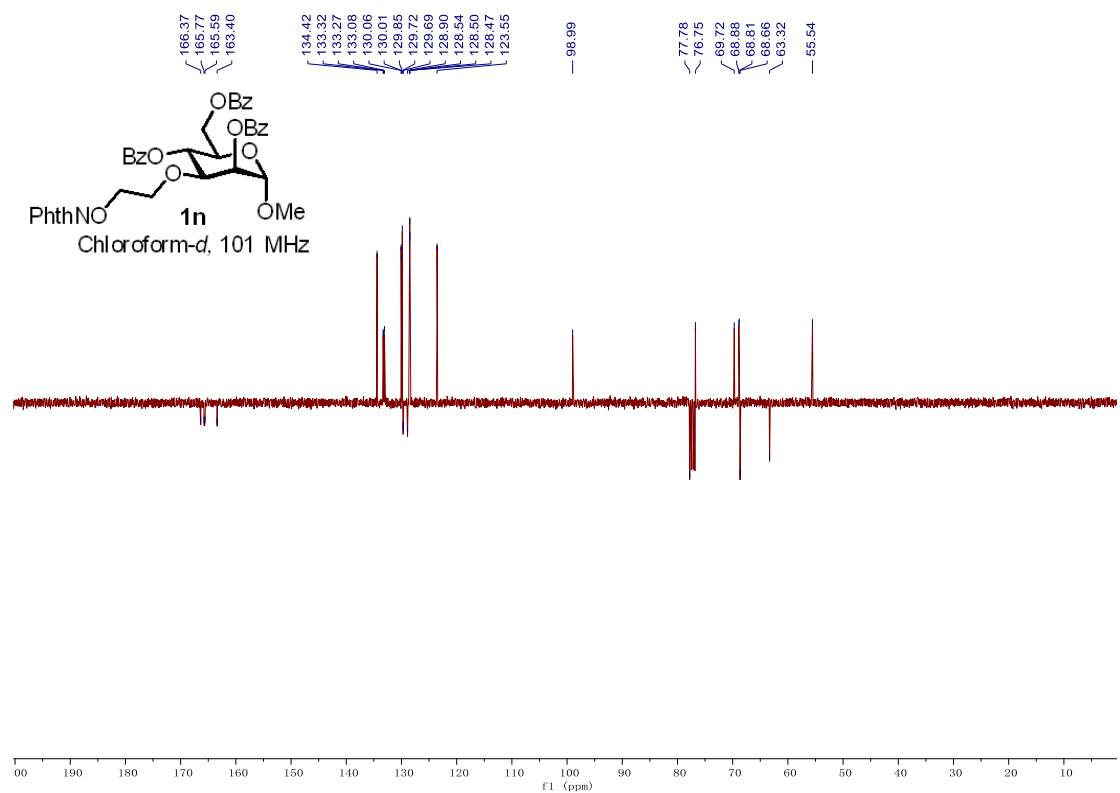

**<sup>13</sup>C NMR Spectra of compound 1n**

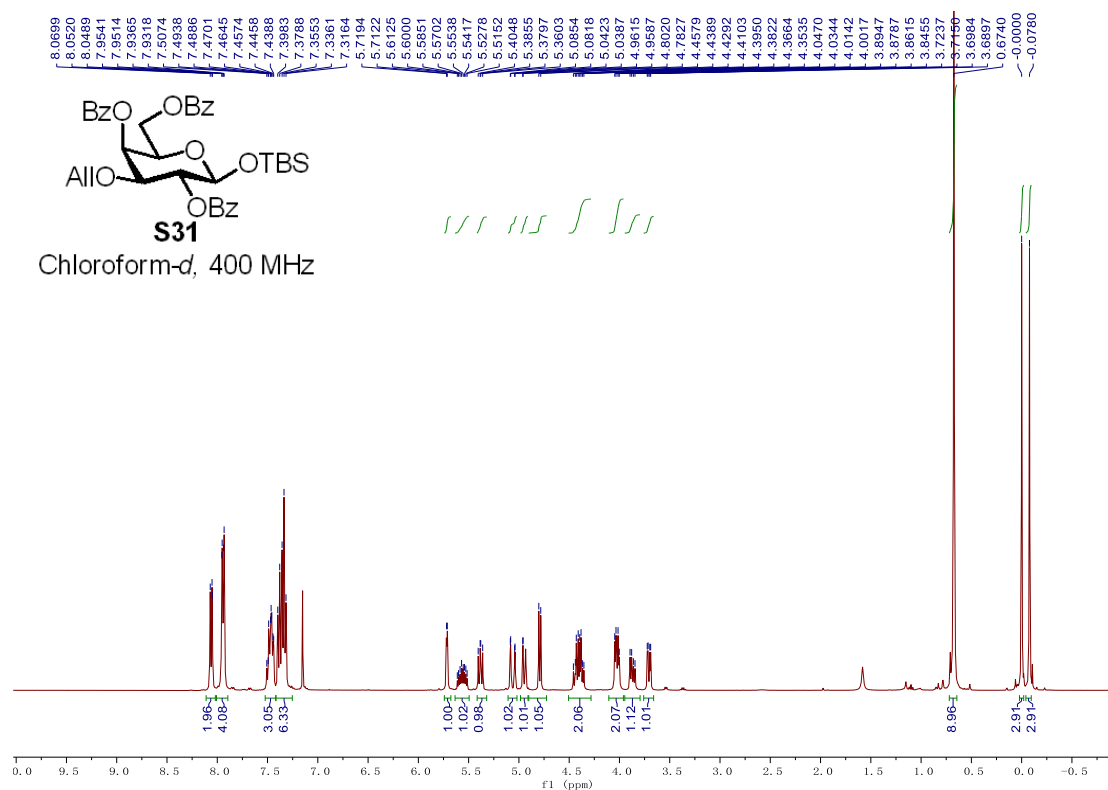

**<sup>1</sup>H NMR Spectra of compound S31**

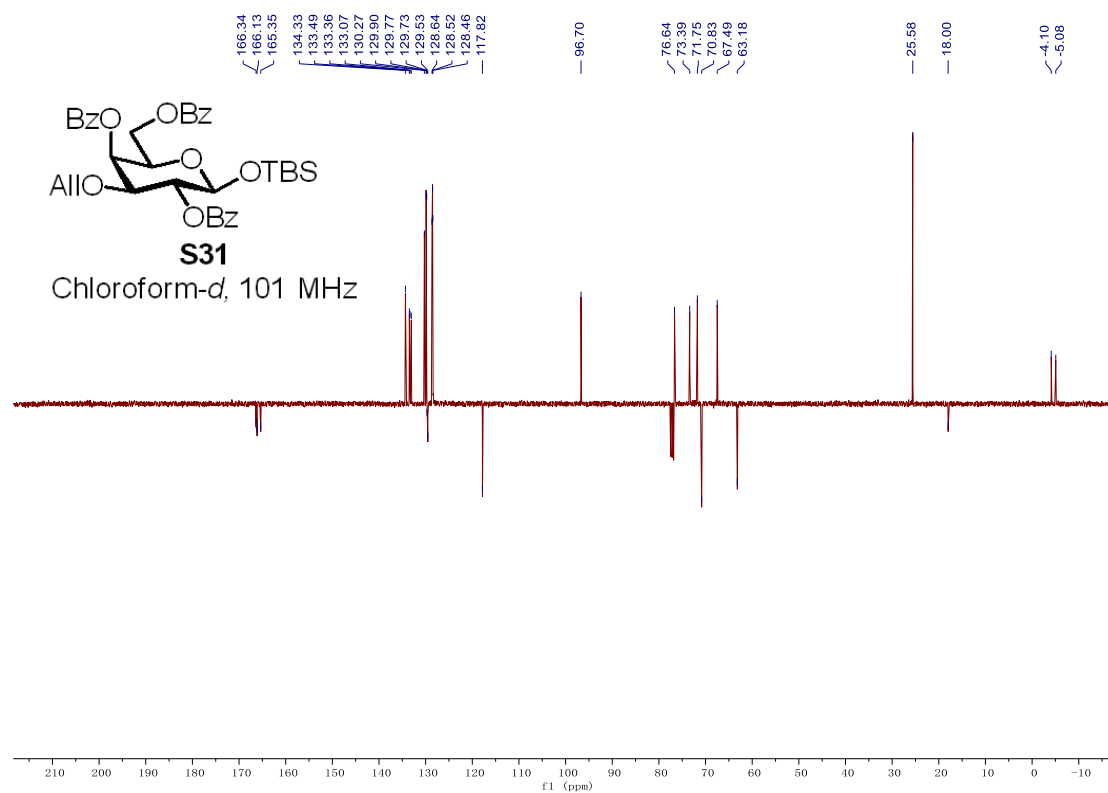

**<sup>13</sup>C NMR Spectra of compound S31**

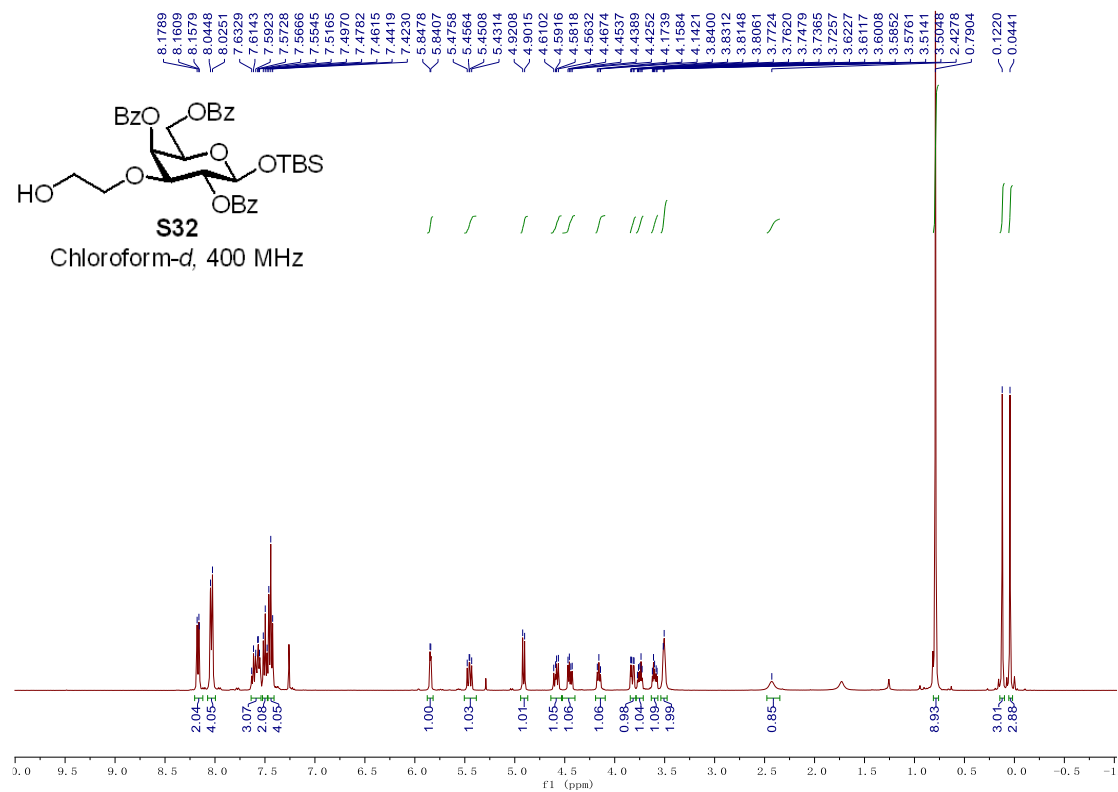

**<sup>1</sup>H NMR Spectra of compound S32**

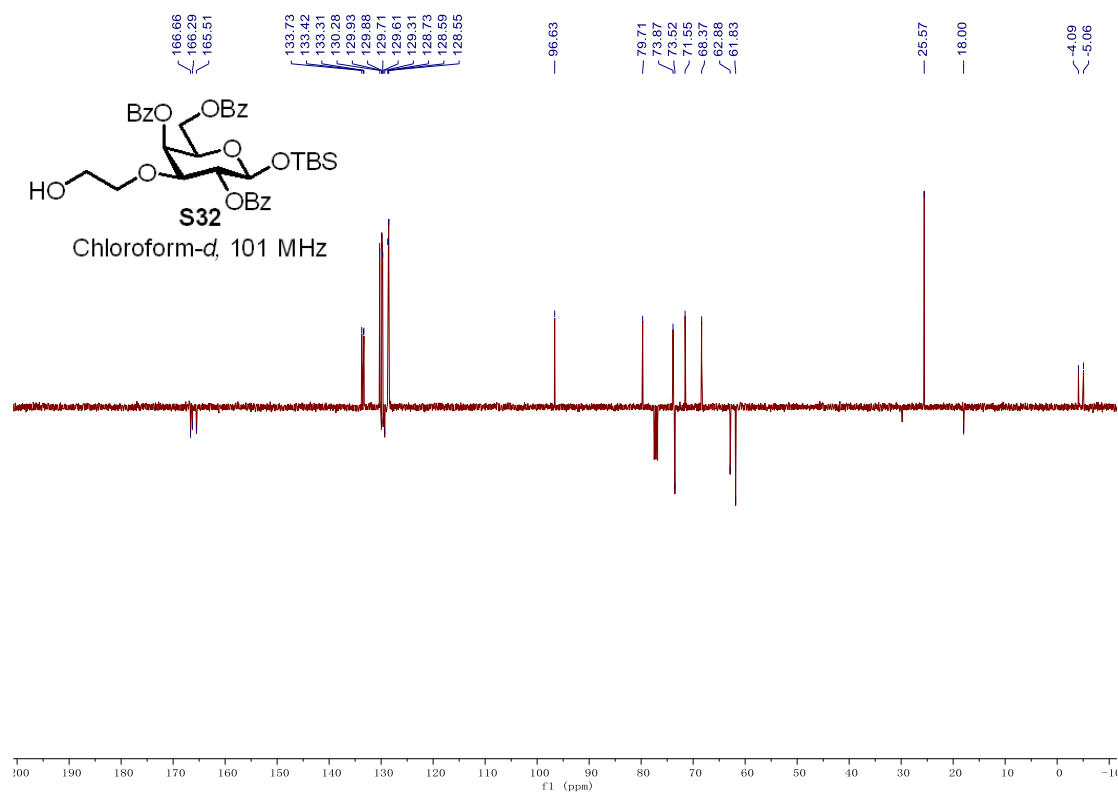

**<sup>13</sup>C NMR Spectra of compound S32**

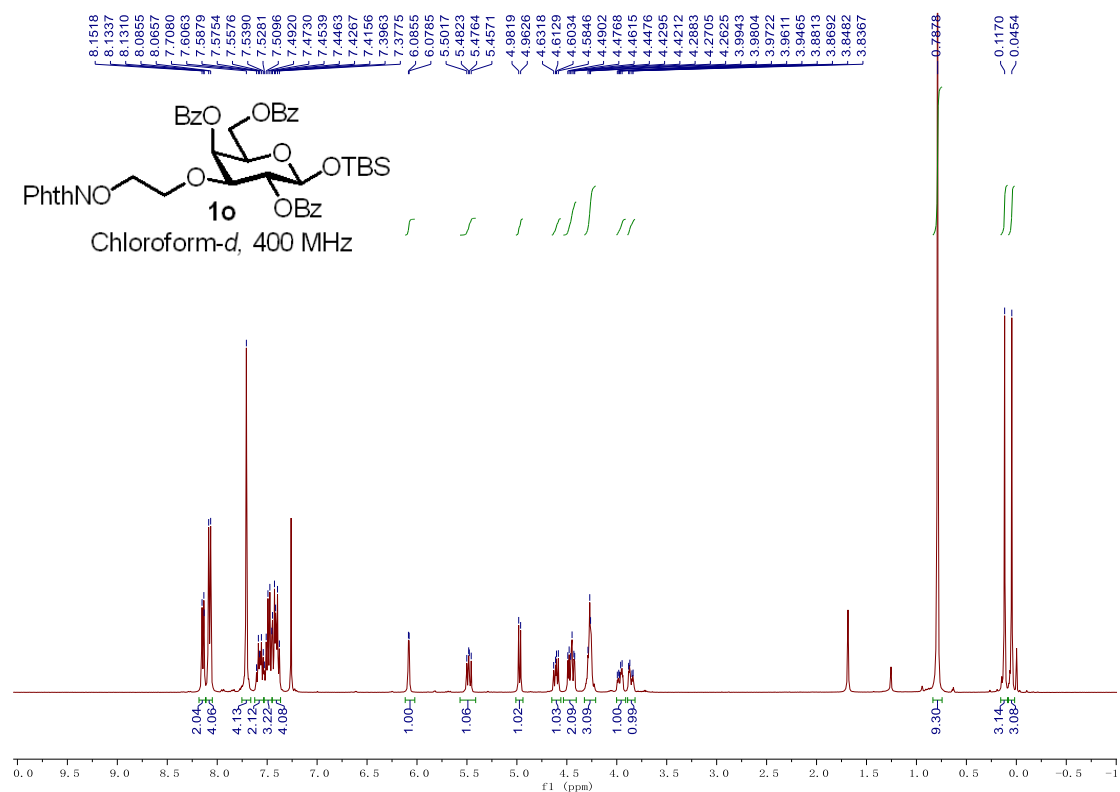

$^1\text{H}$  NMR Spectra of compound **1o**

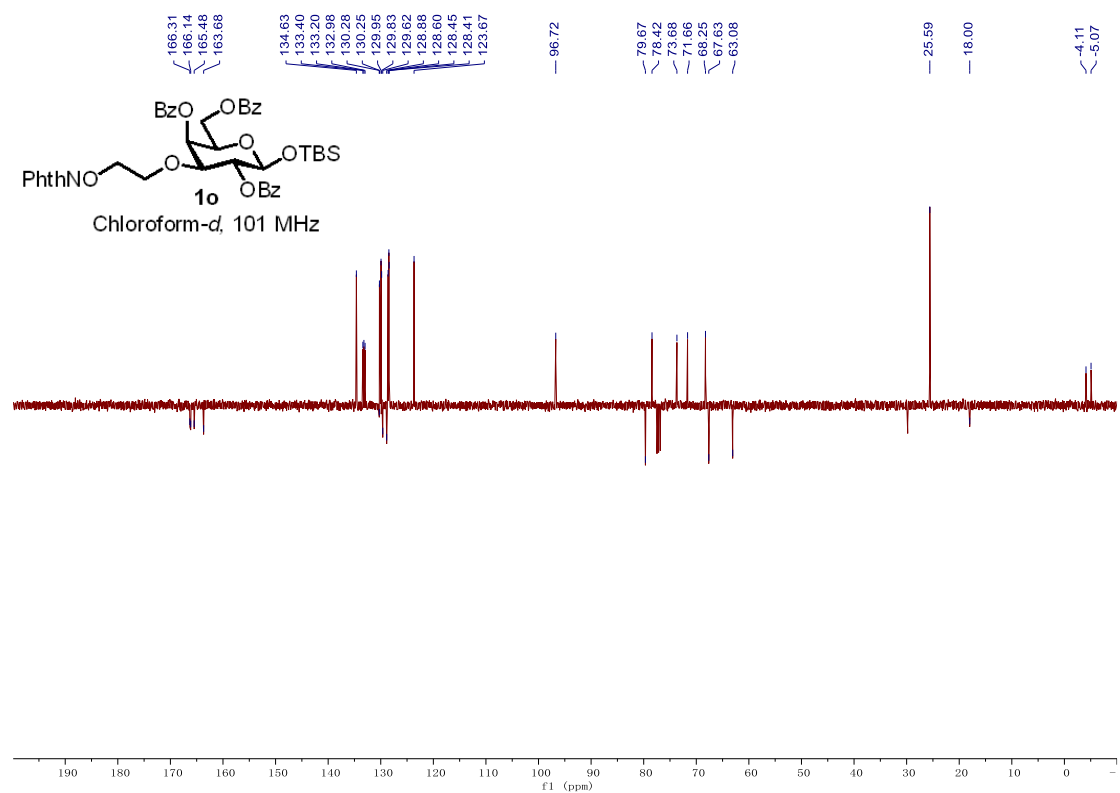

$^{13}\text{C}$  NMR Spectra of compound **1o**



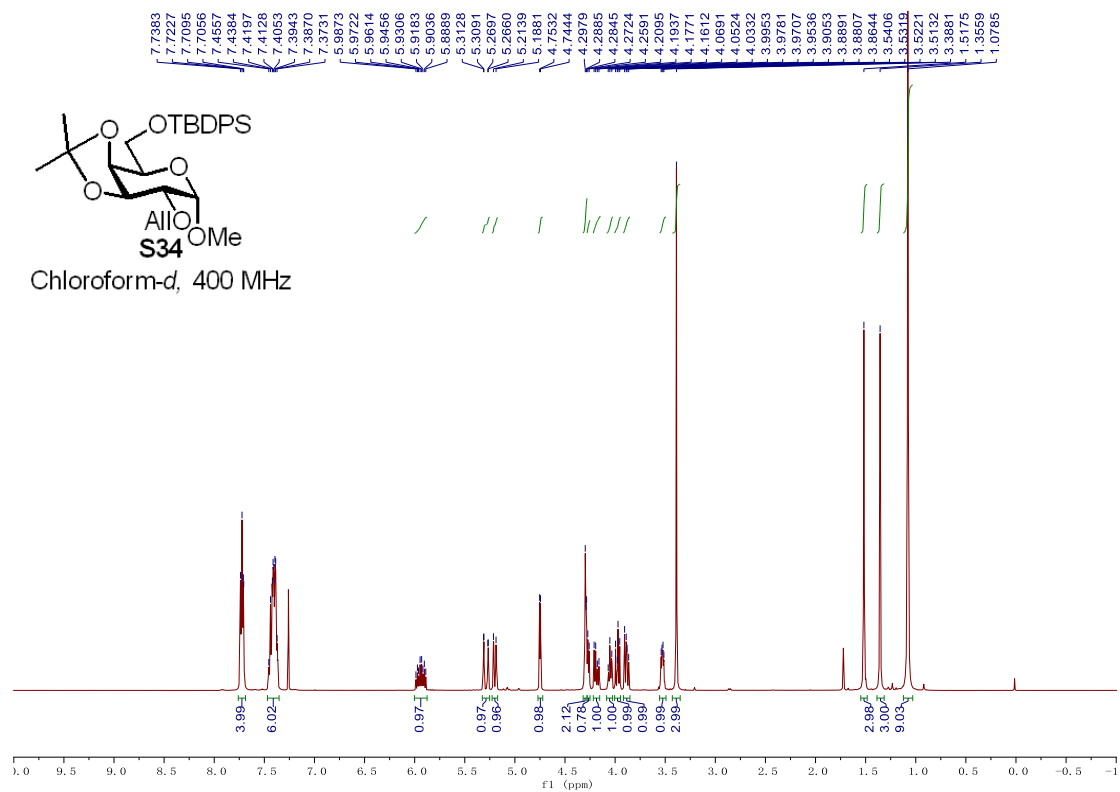

**<sup>1</sup>H NMR Spectra of compound S34**

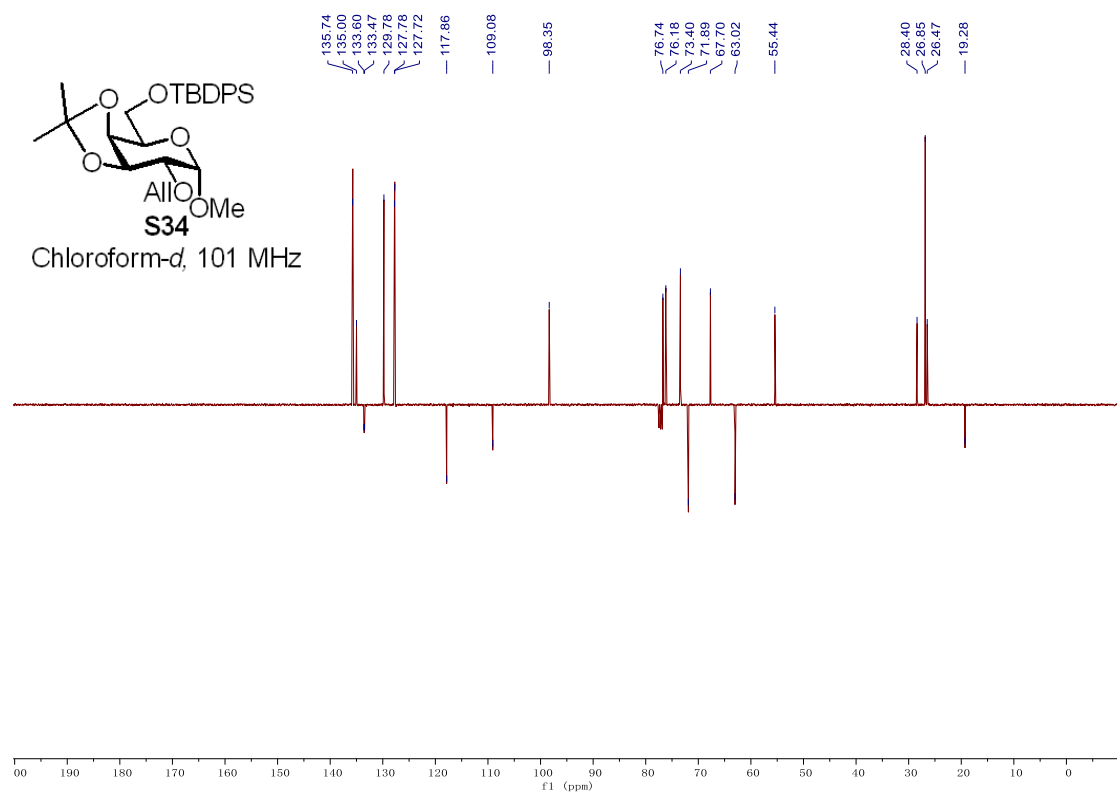

**<sup>13</sup>C NMR Spectra of compound S34**

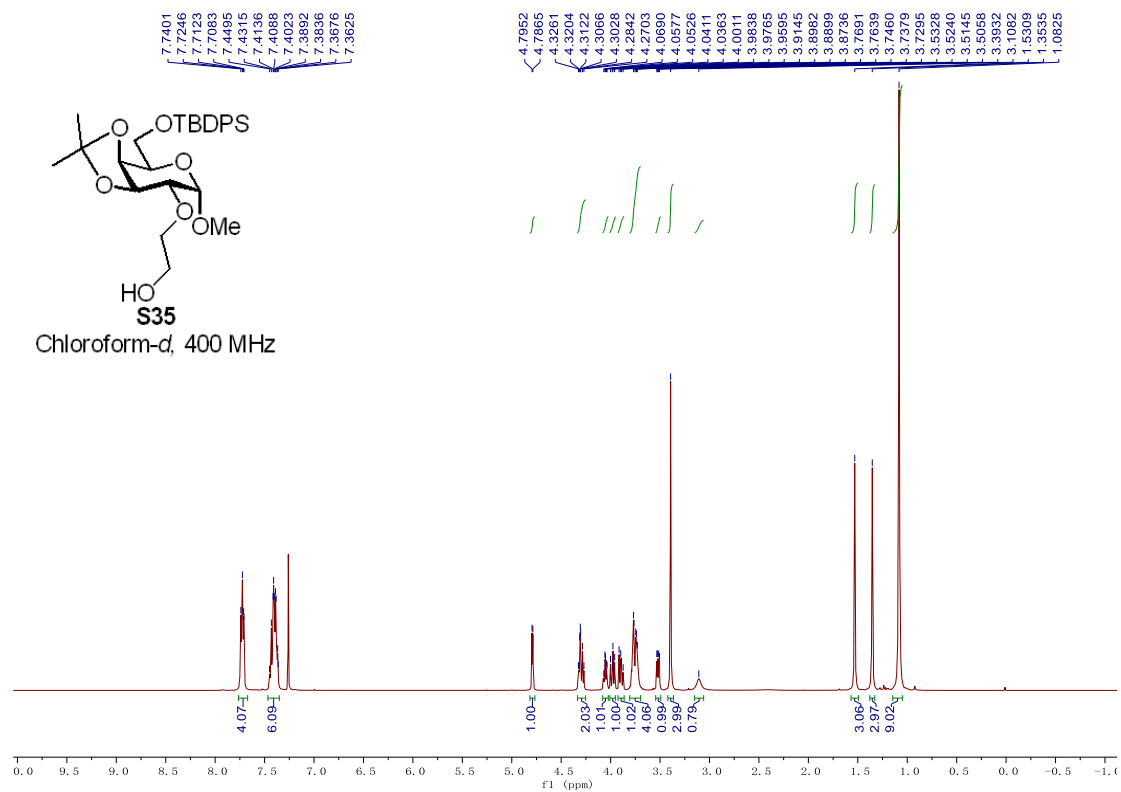

### <sup>1</sup>H NMR Spectra of compound S35

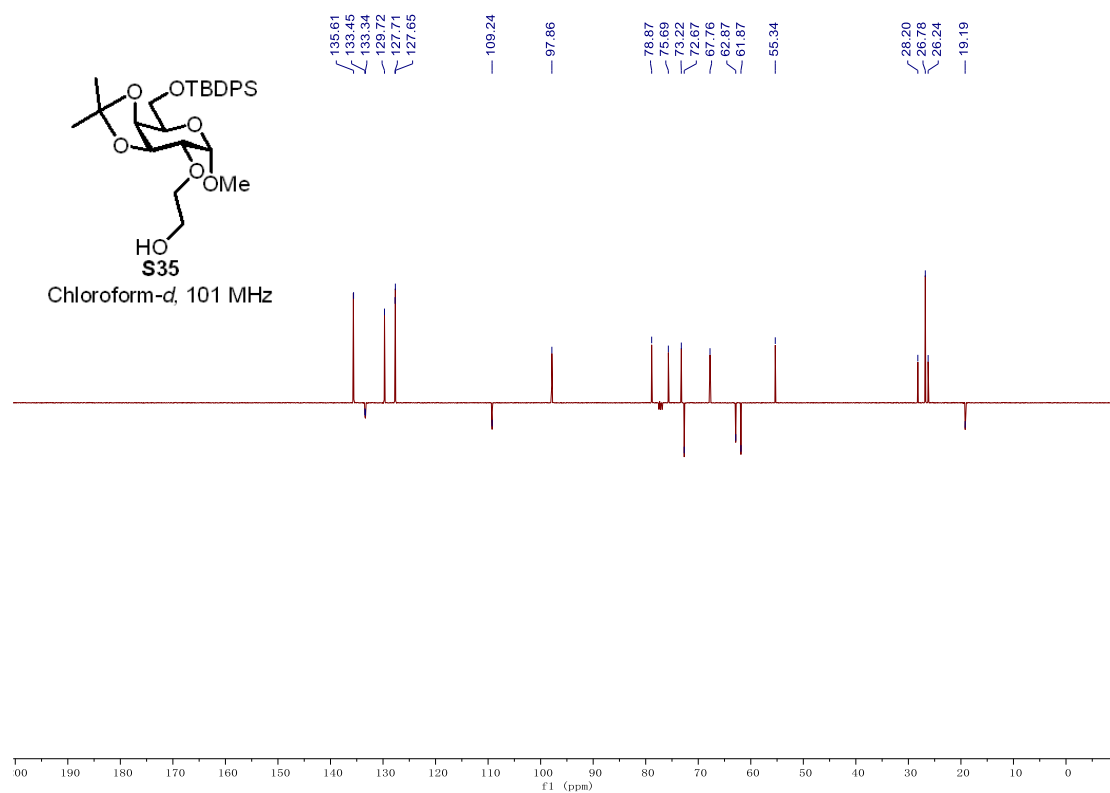

### <sup>13</sup>C NMR Spectra of compound S35

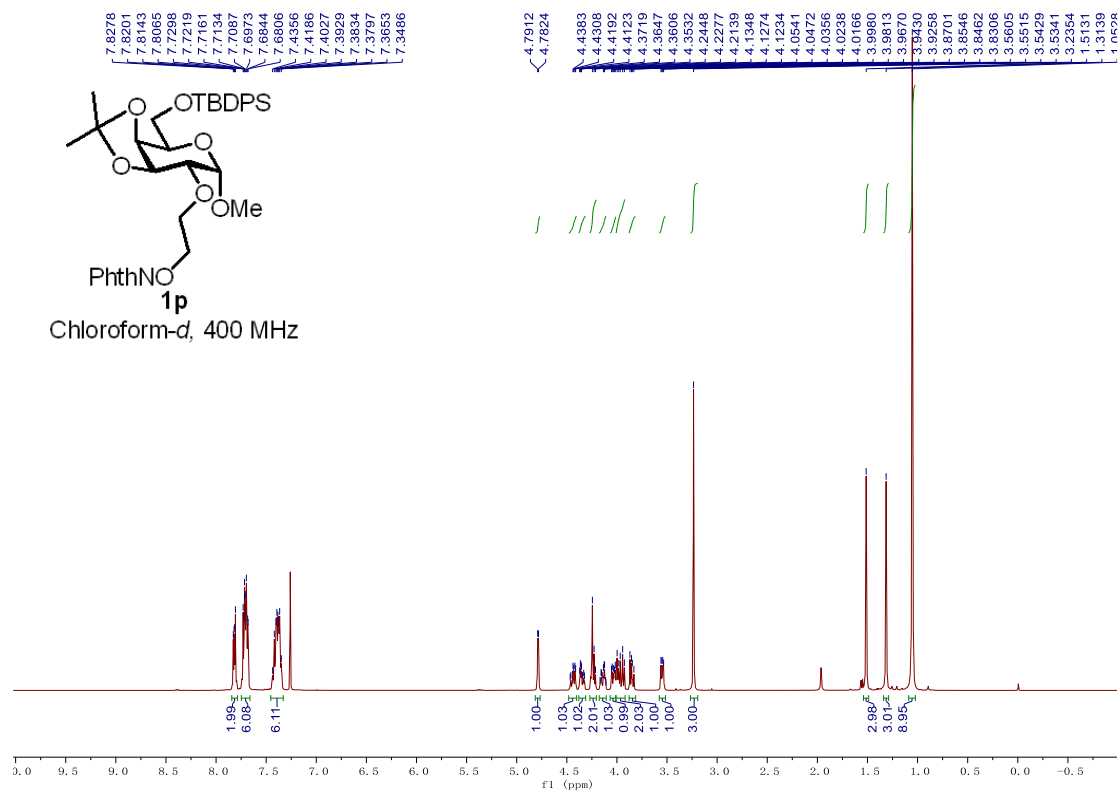

**<sup>1</sup>H NMR Spectra of compound 1p**

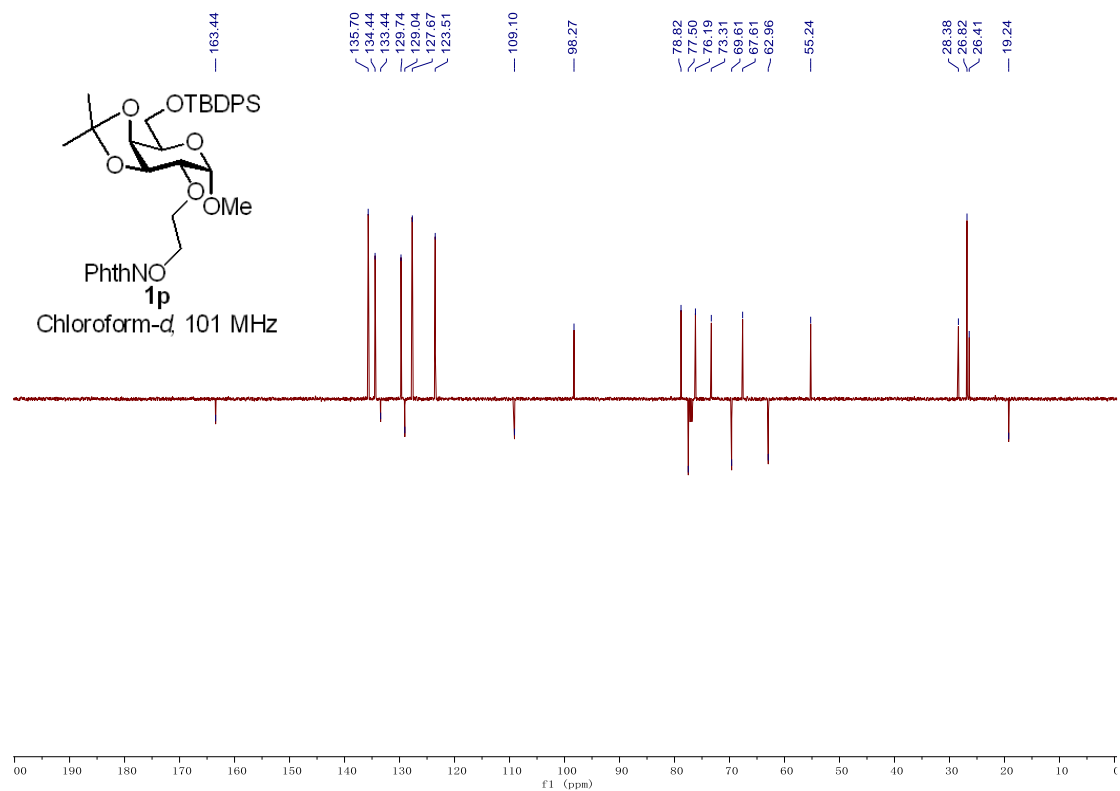

**<sup>13</sup>C NMR Spectra of compound 1p**

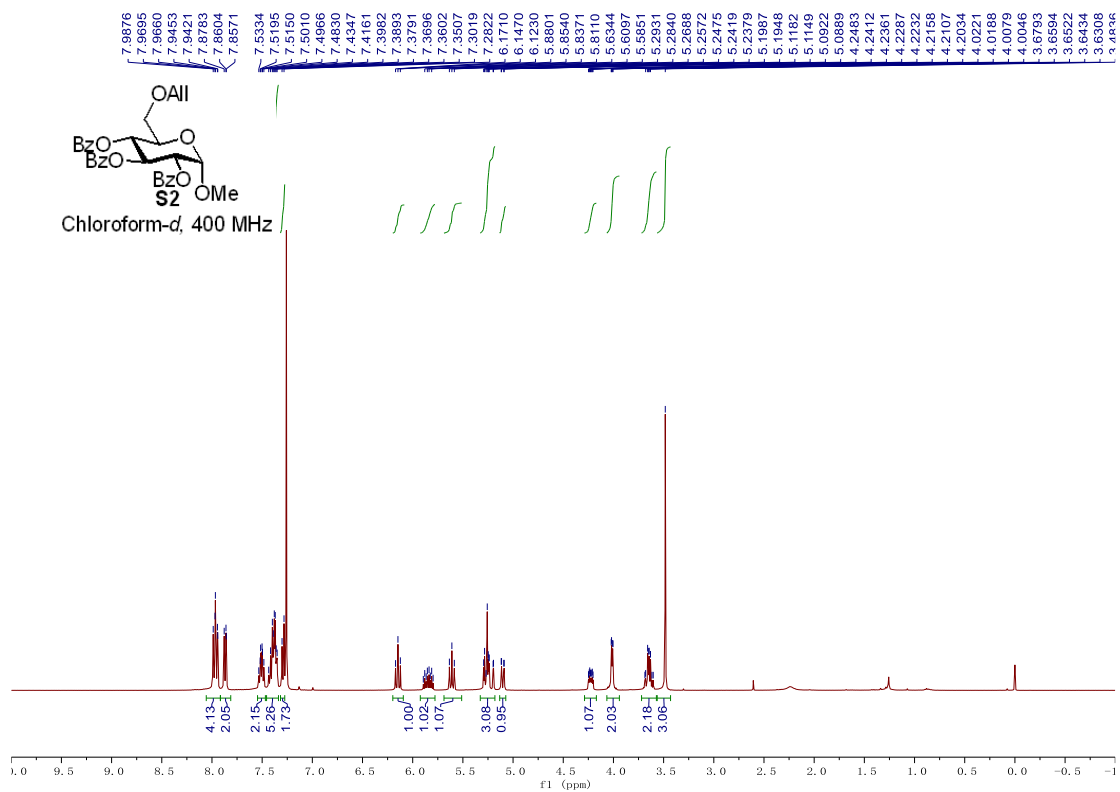

**<sup>1</sup>H NMR Spectra of compound S2**

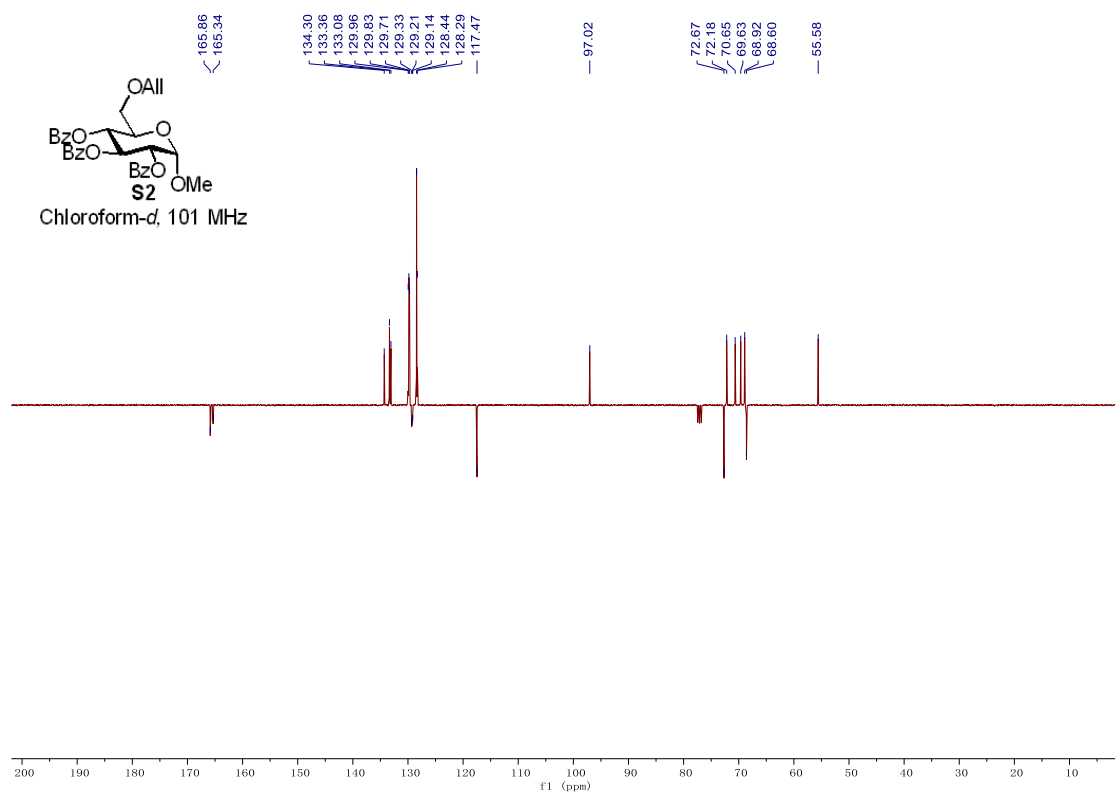

**<sup>13</sup>C NMR Spectra of compound S2**

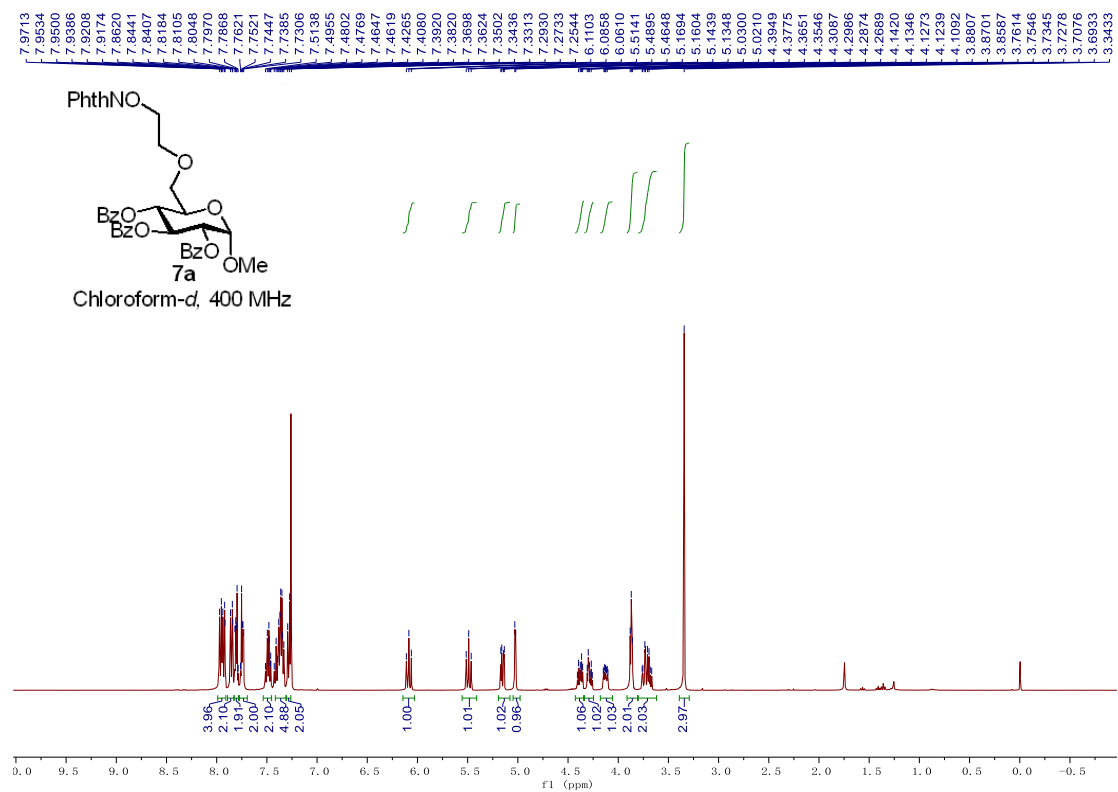

**<sup>1</sup>H NMR Spectra of compound 7a**

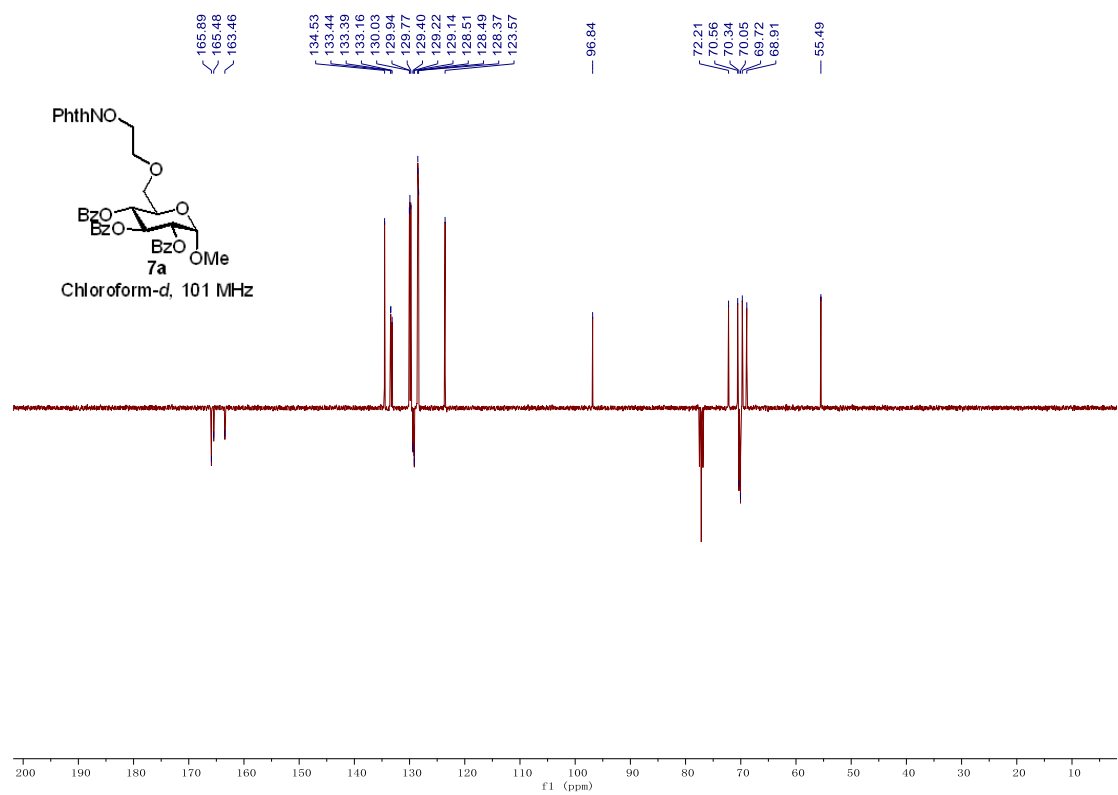

**<sup>13</sup>C NMR Spectra of compound 7a**

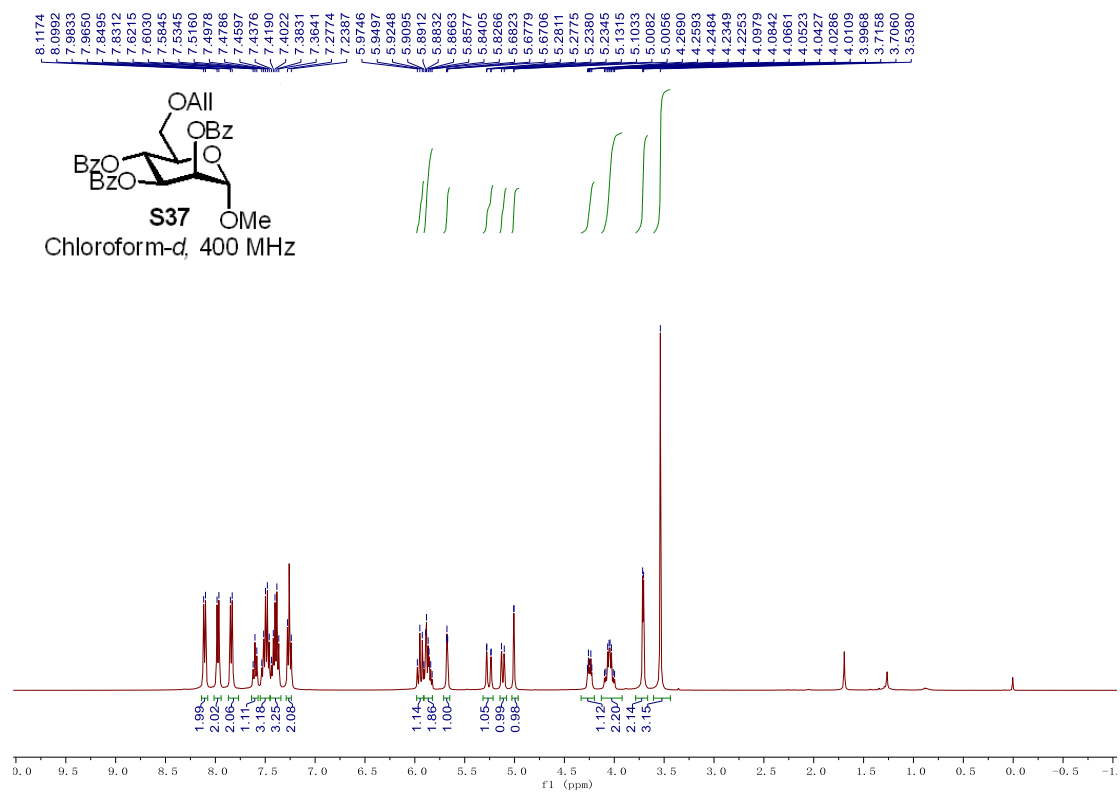

**<sup>1</sup>H NMR Spectra of compound S37**

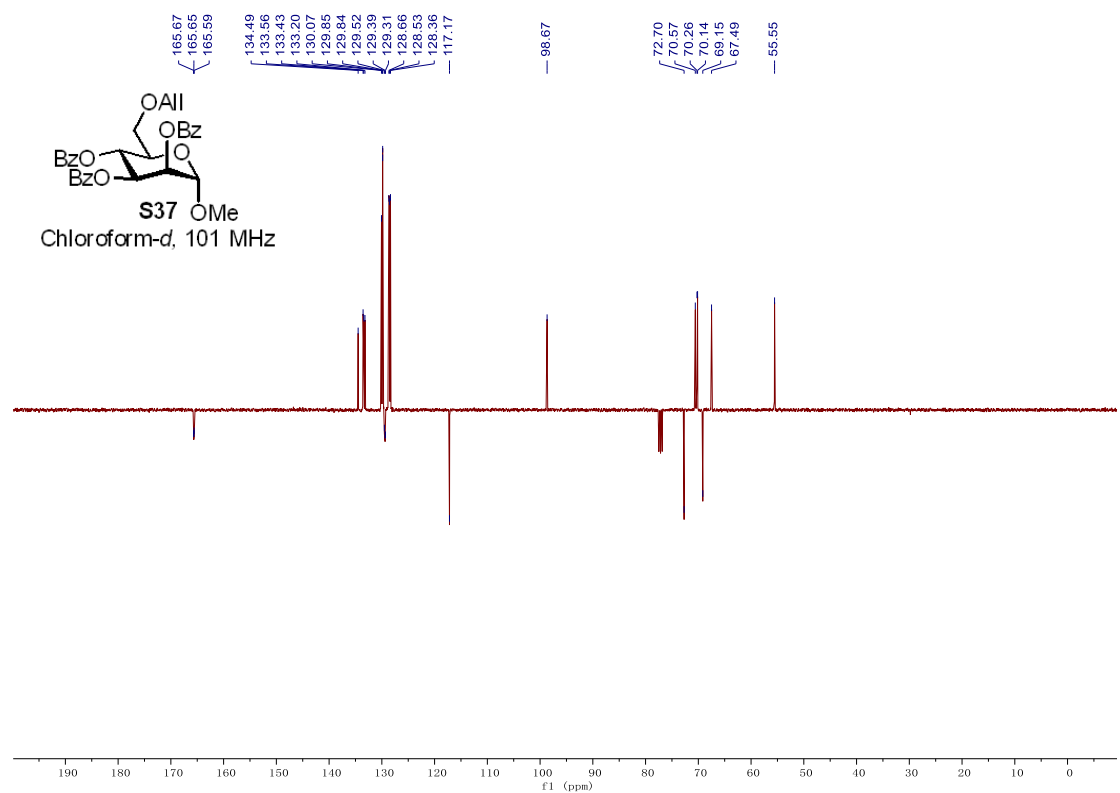

**<sup>13</sup>C NMR Spectra of compound S37**

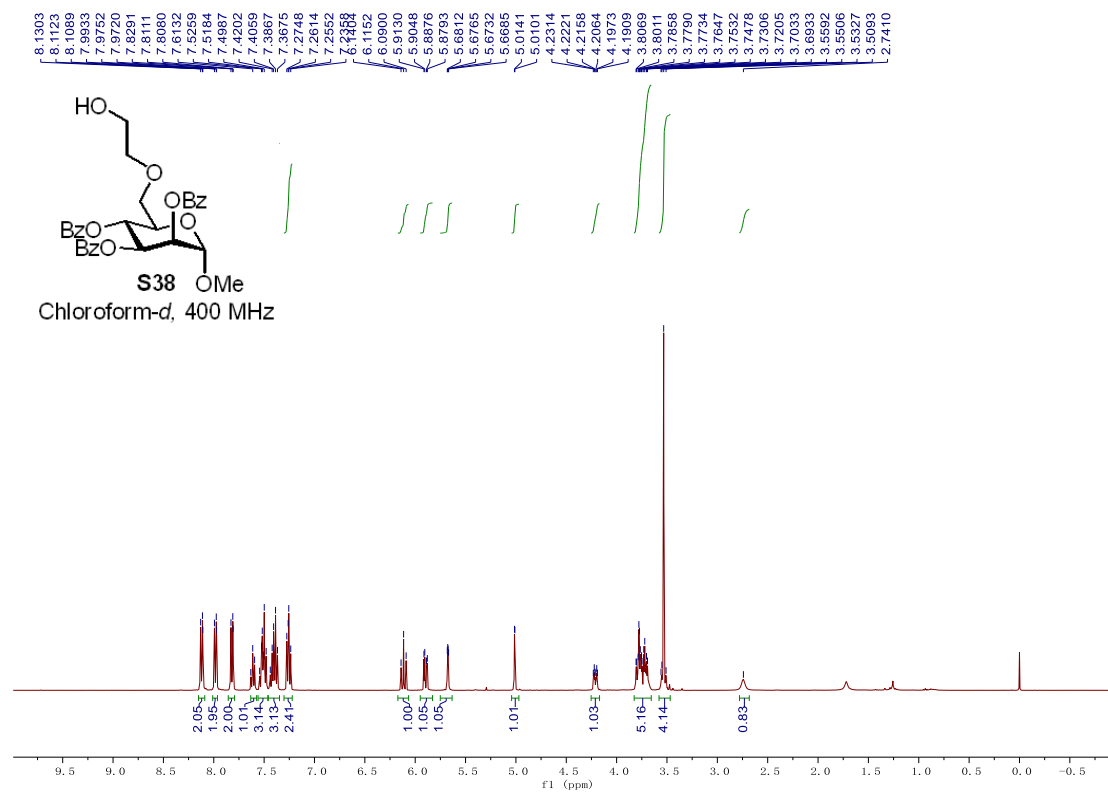

**<sup>1</sup>H NMR Spectra of compound S38**

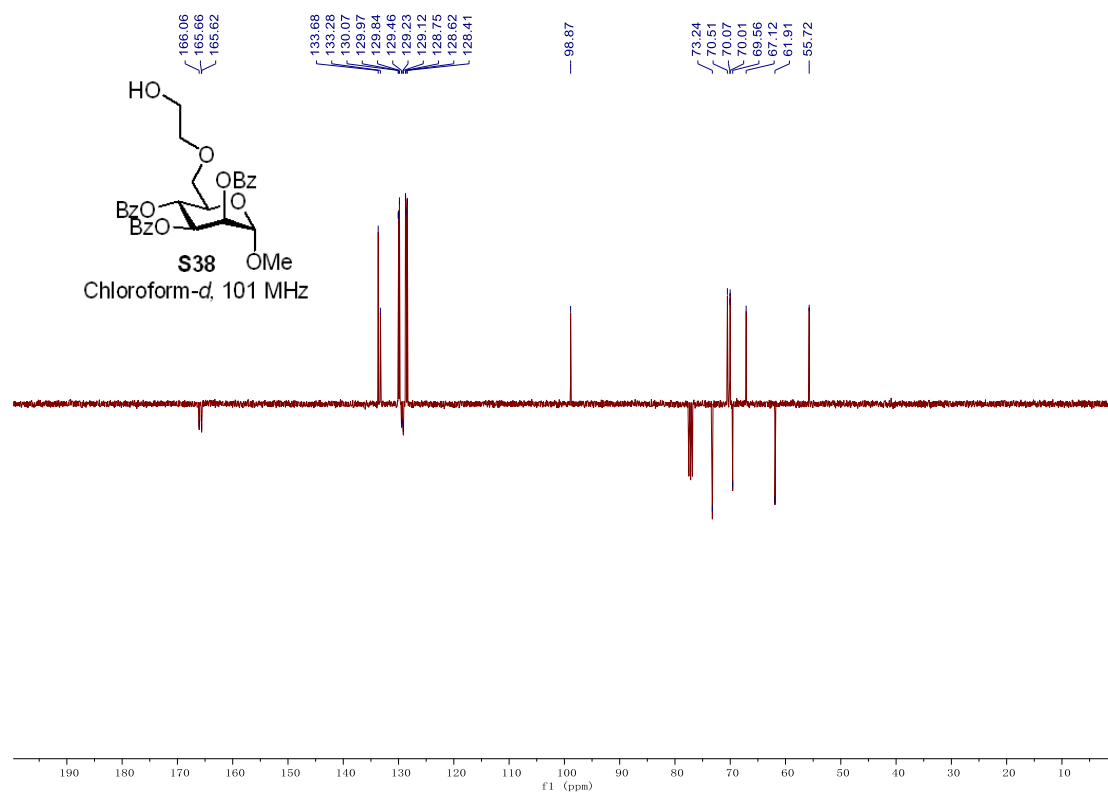

**<sup>13</sup>C NMR Spectra of compound S38**

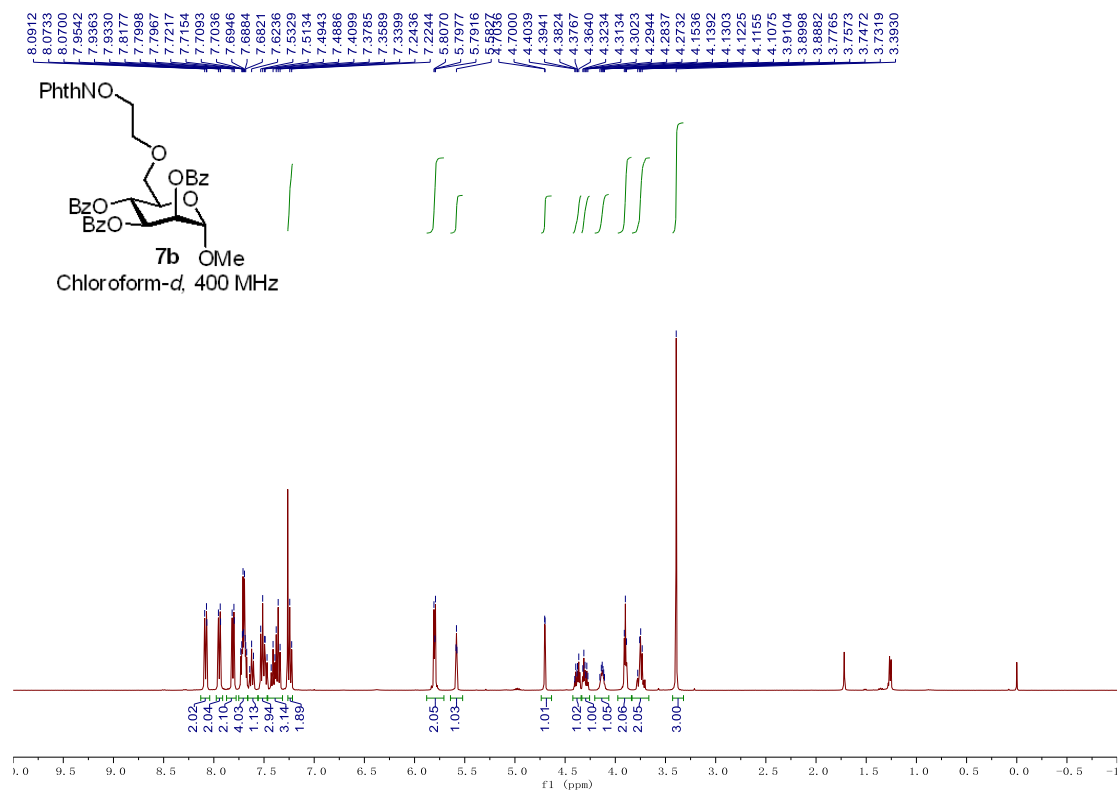

$^1\text{H}$  NMR Spectra of compound **7b**

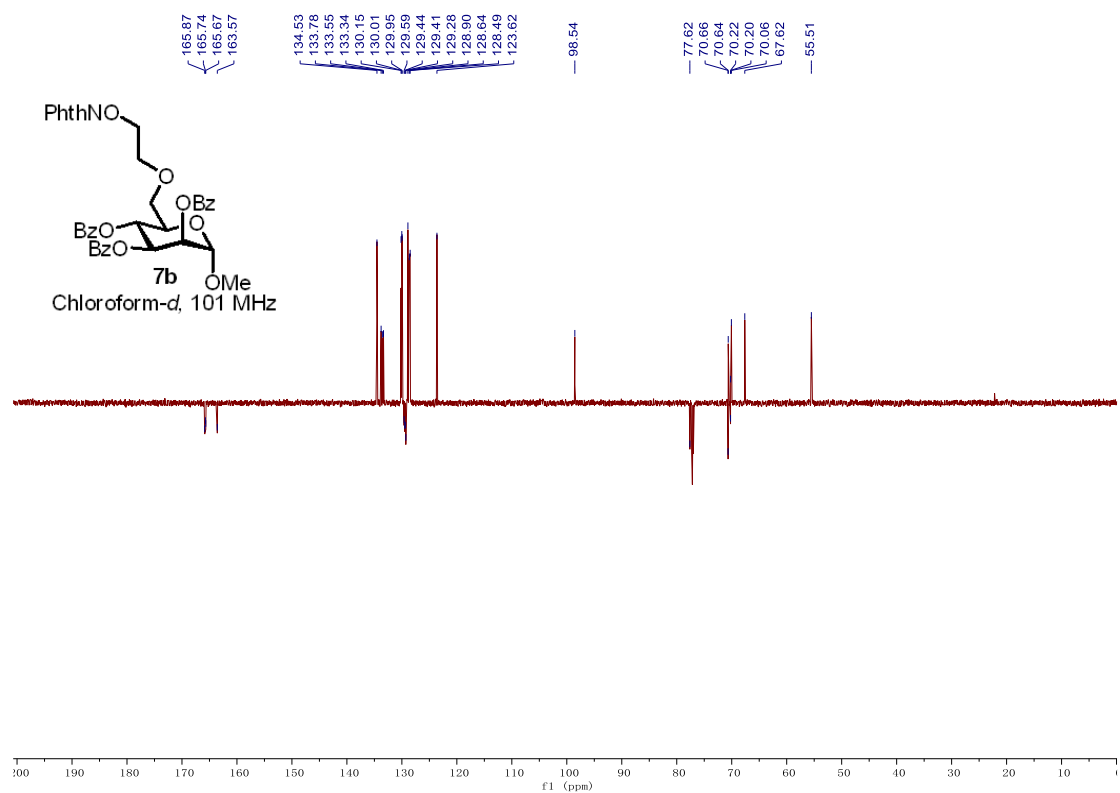

$^{13}\text{C}$  NMR Spectra of compound **7b**



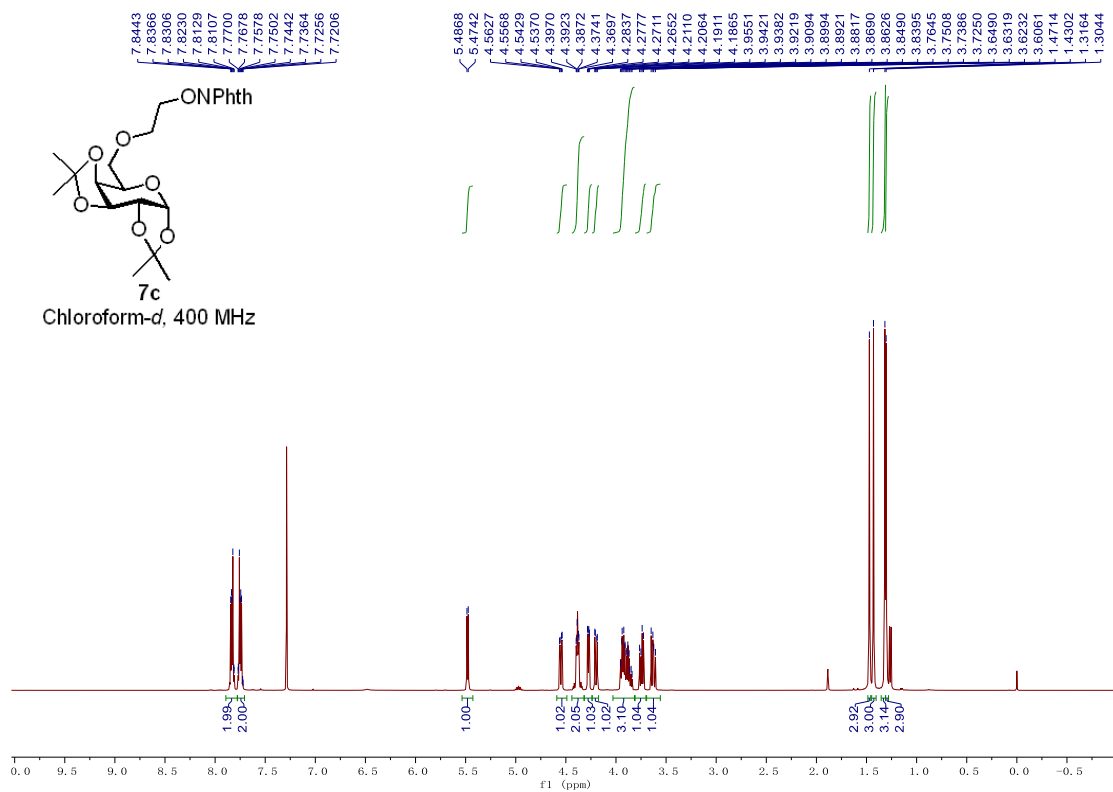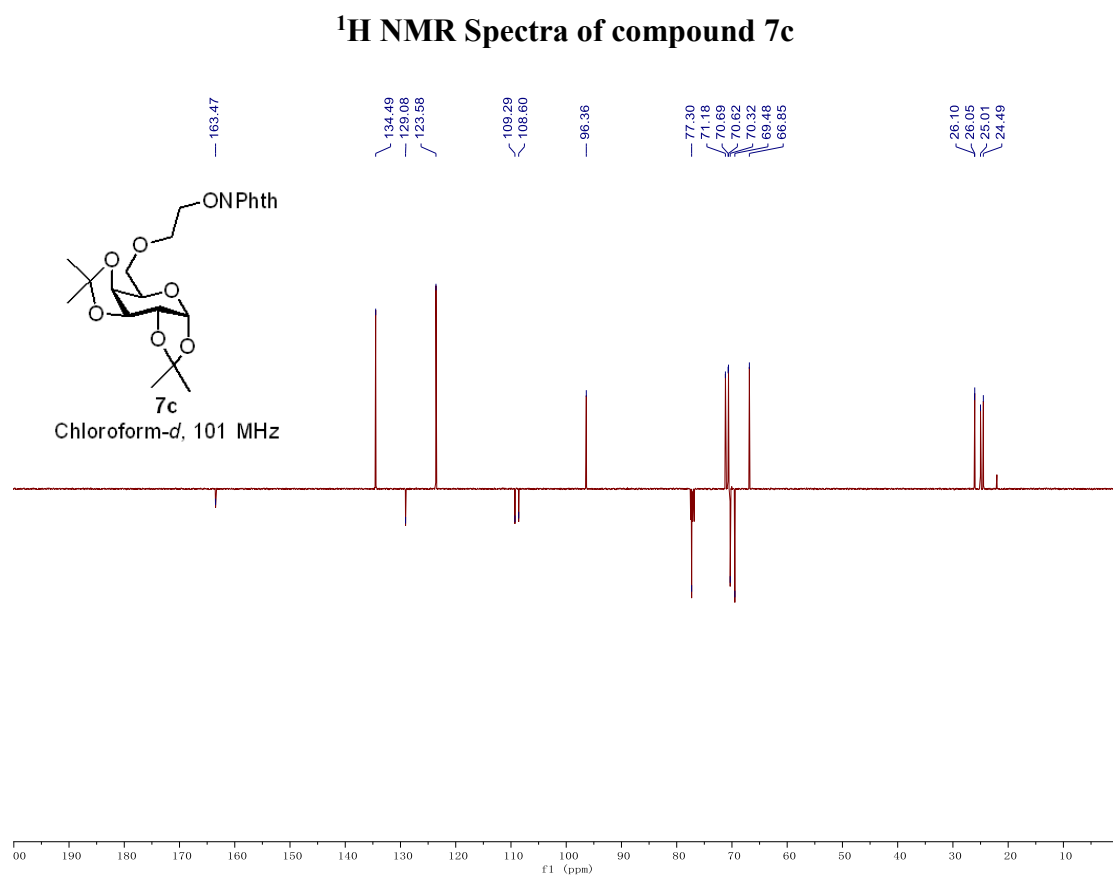

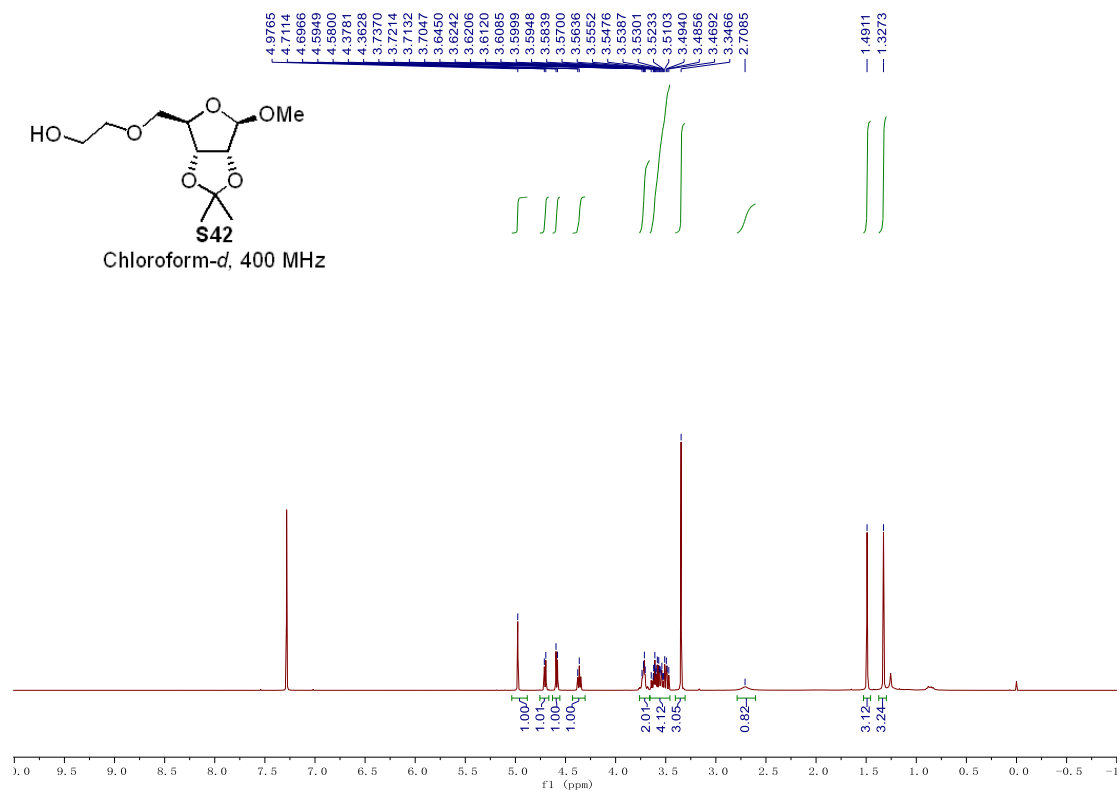

### <sup>1</sup>H NMR Spectra of compound S42

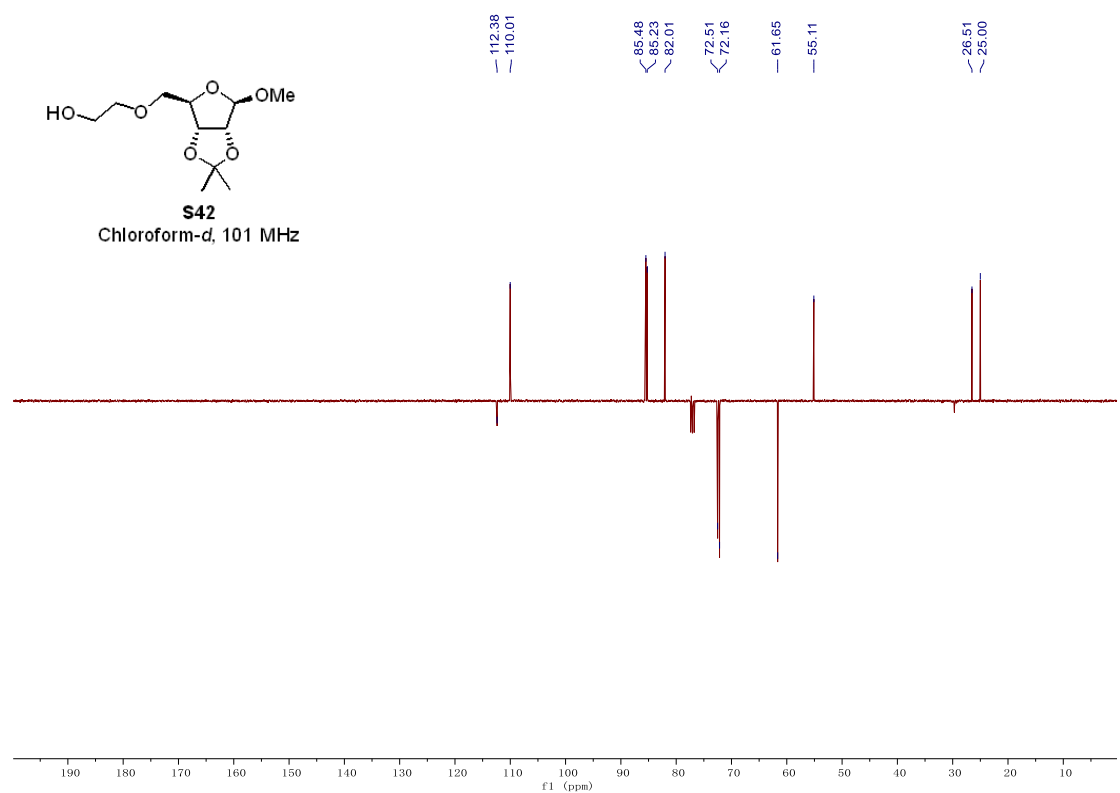

### <sup>13</sup>C NMR Spectra of compound S42

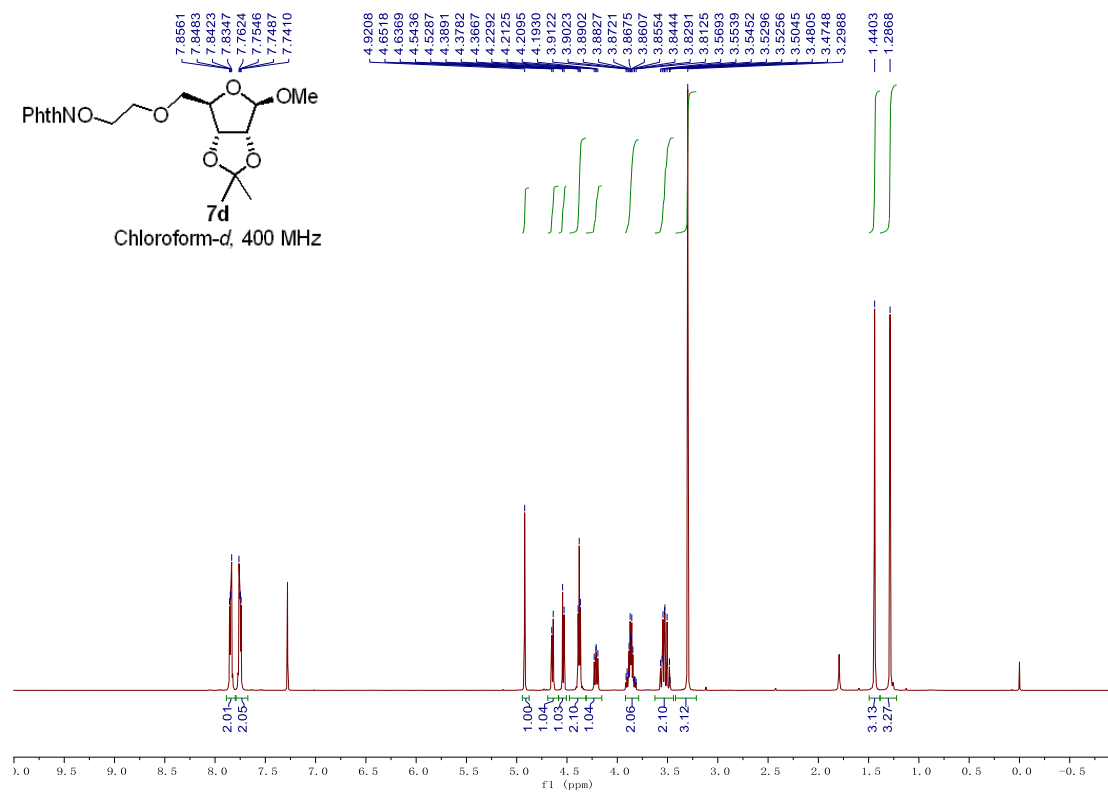

### $^1\text{H}$ NMR Spectra of compound **7d**

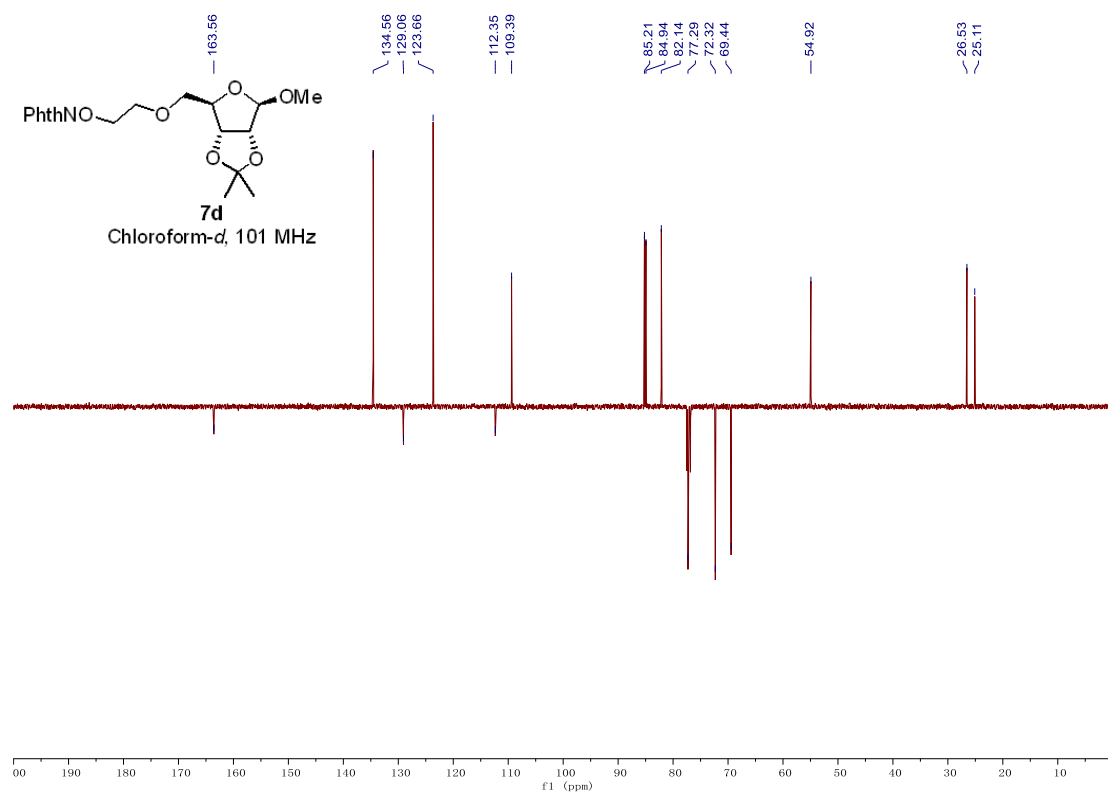

### $^{13}\text{C}$ NMR Spectra of compound **7d**

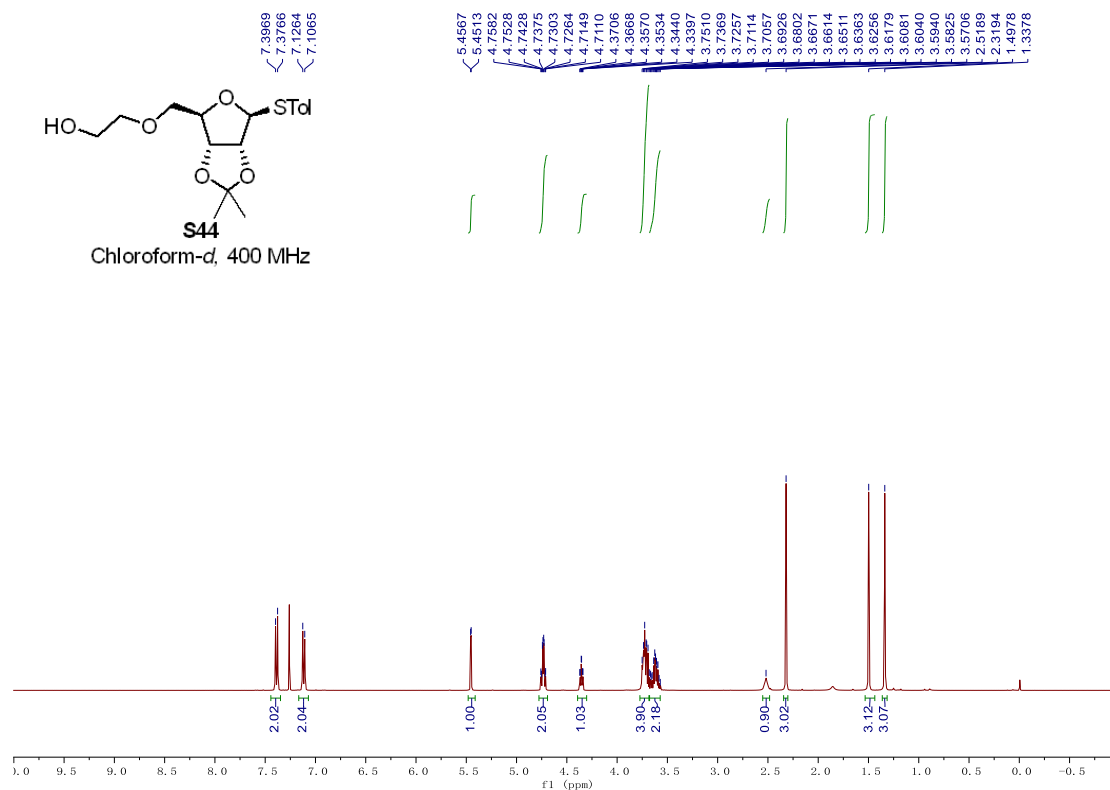

### <sup>1</sup>H NMR Spectra of compound S44

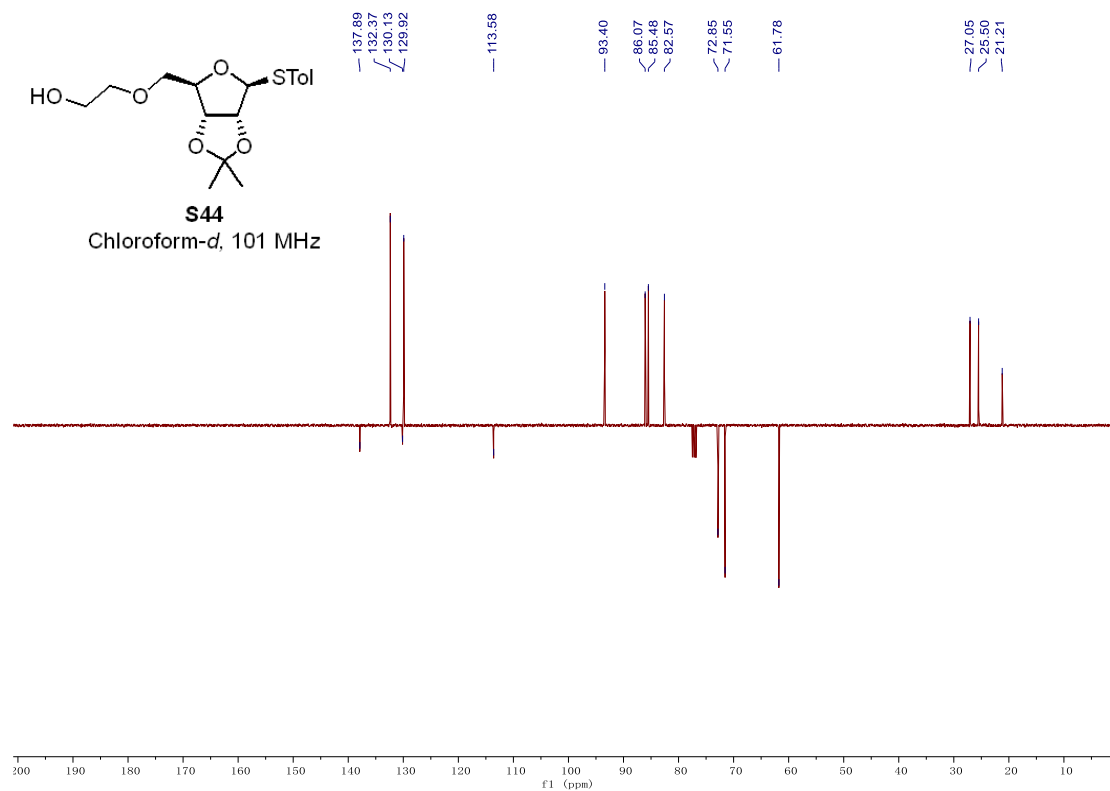

### <sup>13</sup>C NMR Spectra of compound S44

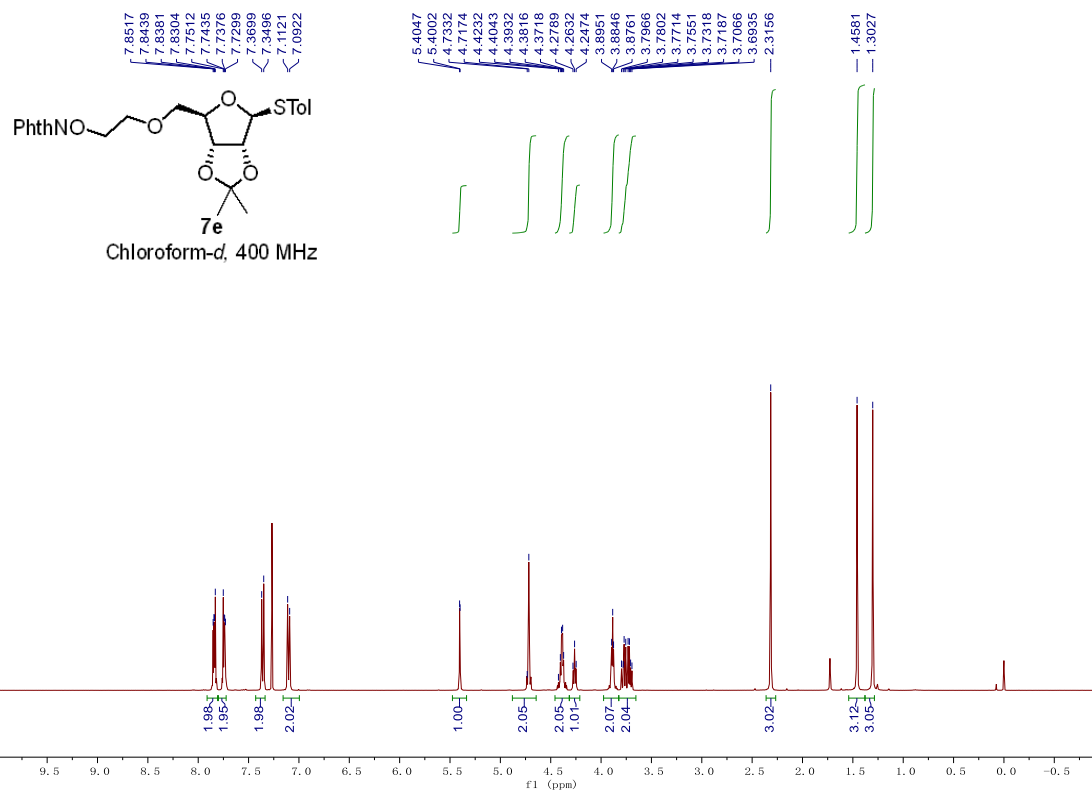

### <sup>1</sup>H NMR Spectra of compound **7e**

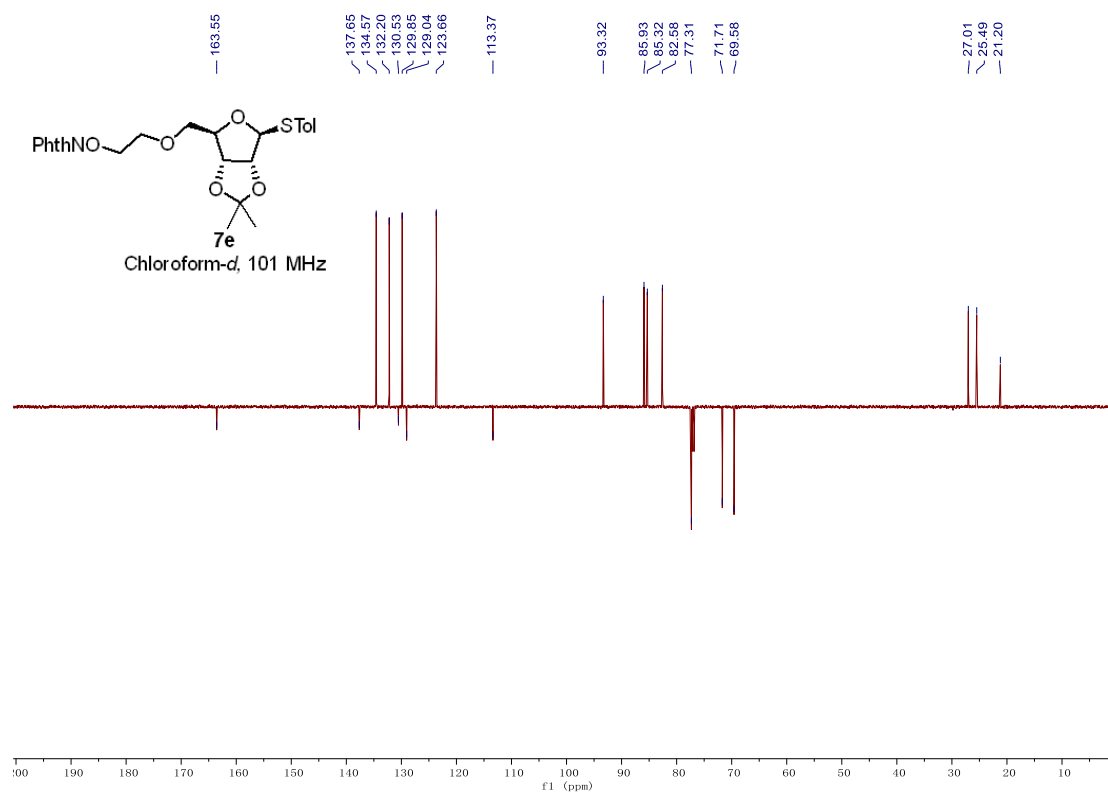

### <sup>13</sup>C NMR Spectra of compound **7e**

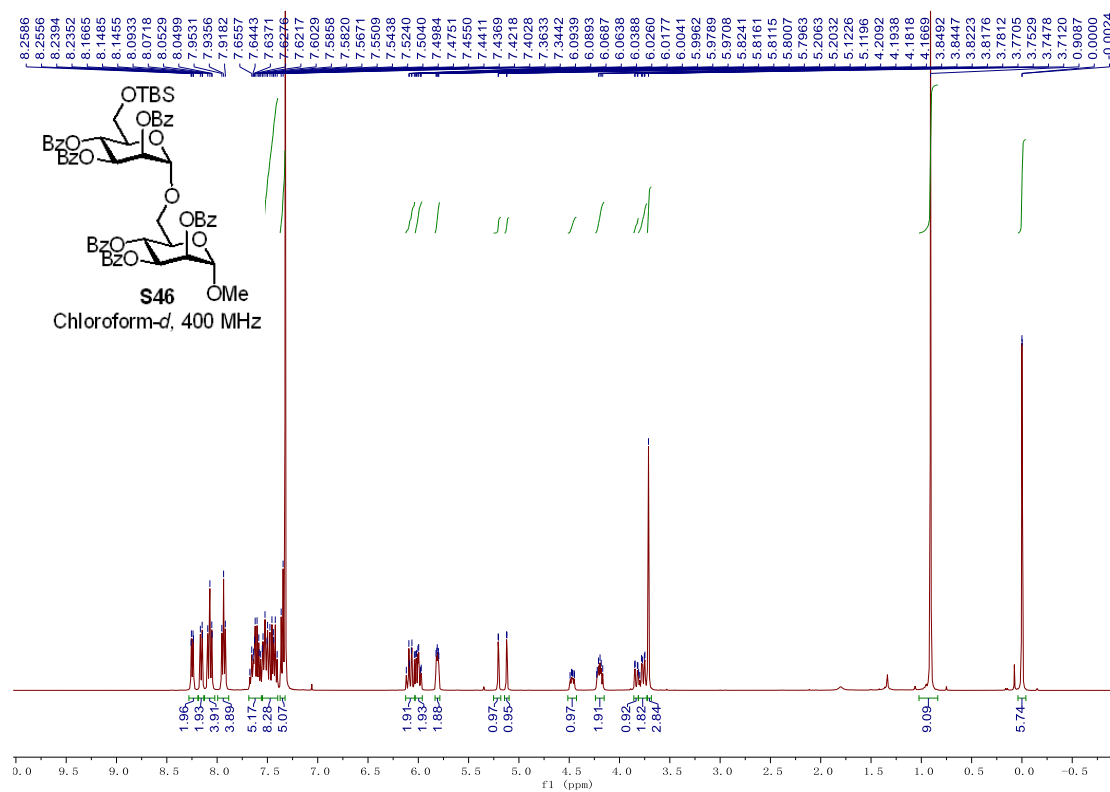

**<sup>1</sup>H NMR Spectra of compound S46**

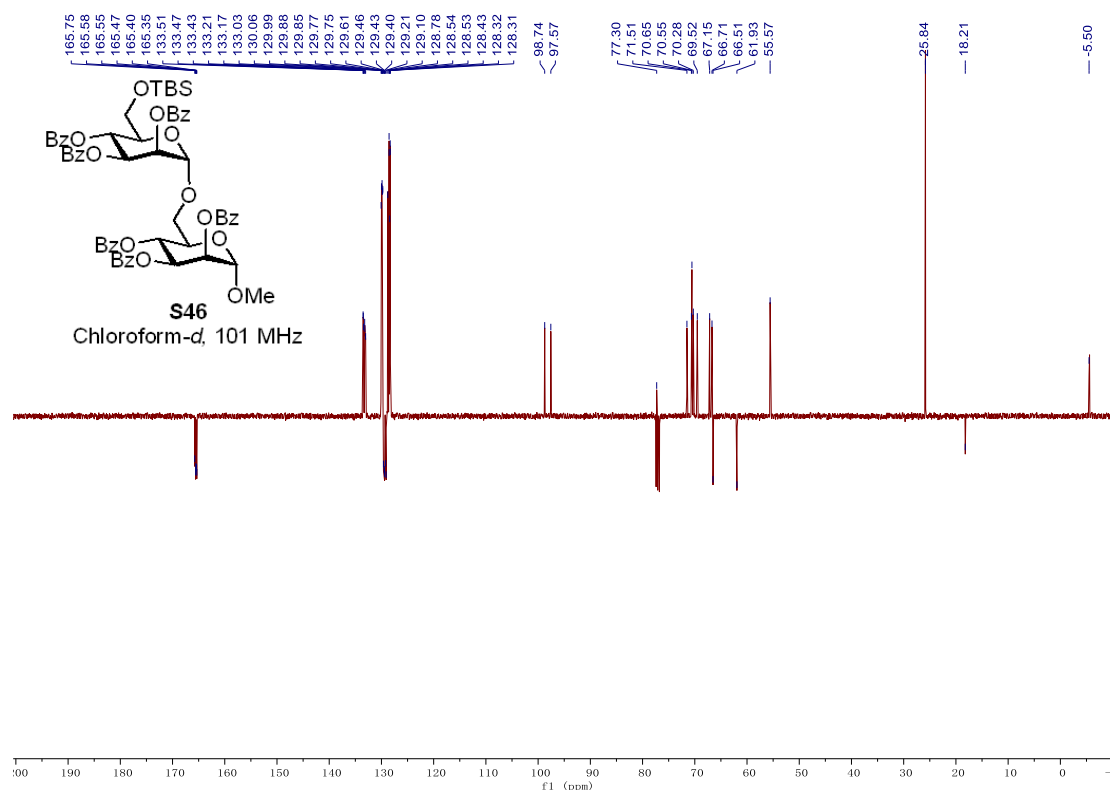

**<sup>13</sup>C NMR Spectra of compound S46**

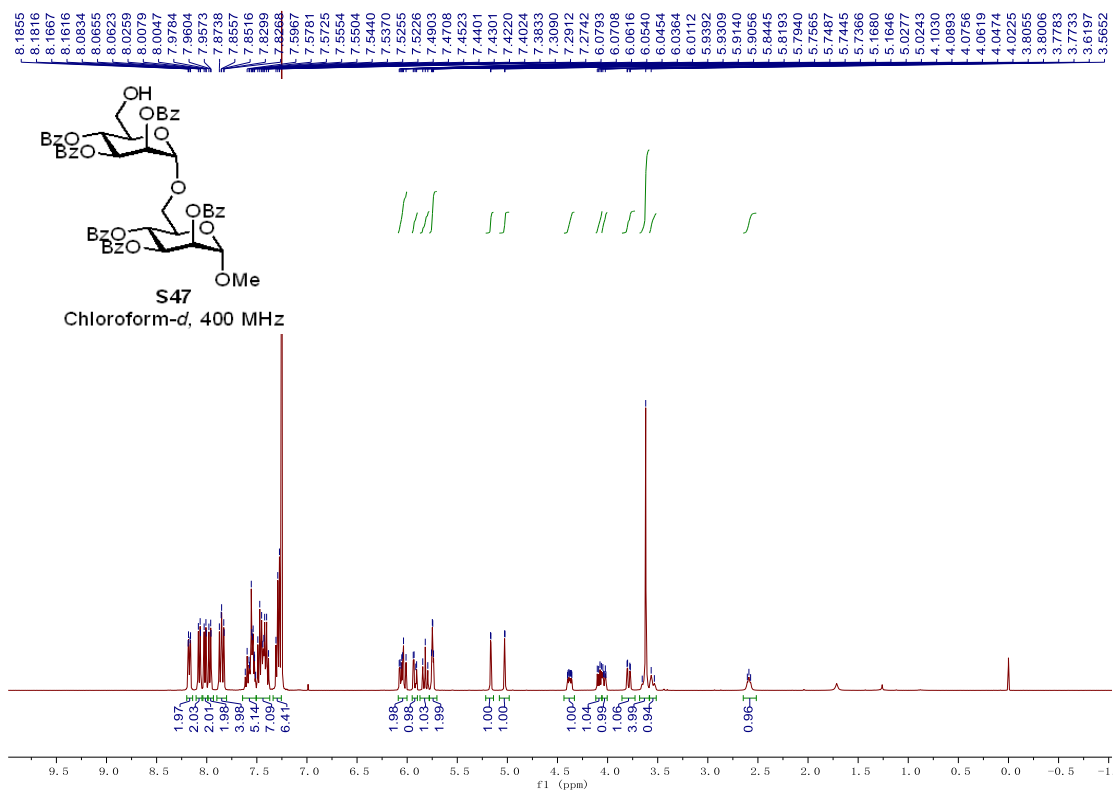

**<sup>1</sup>H NMR Spectra of compound S47**

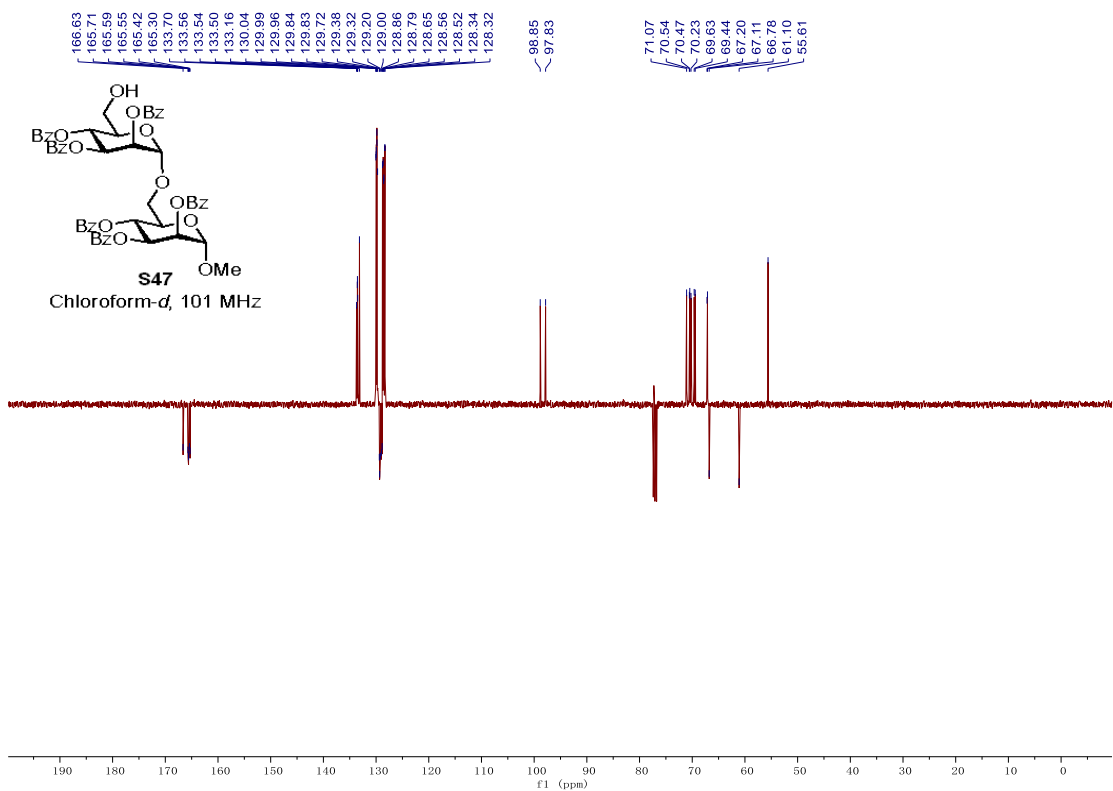

**<sup>13</sup>C NMR Spectra of compound S47**

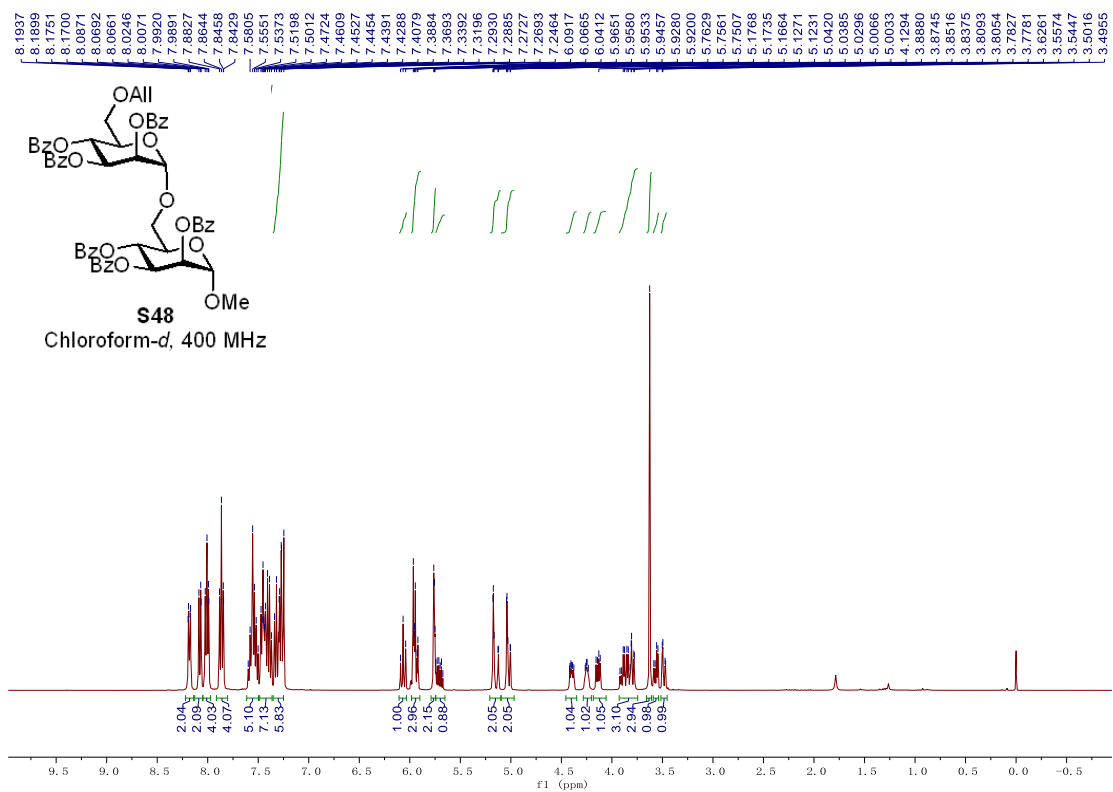

**<sup>1</sup>H NMR Spectra of compound S48**

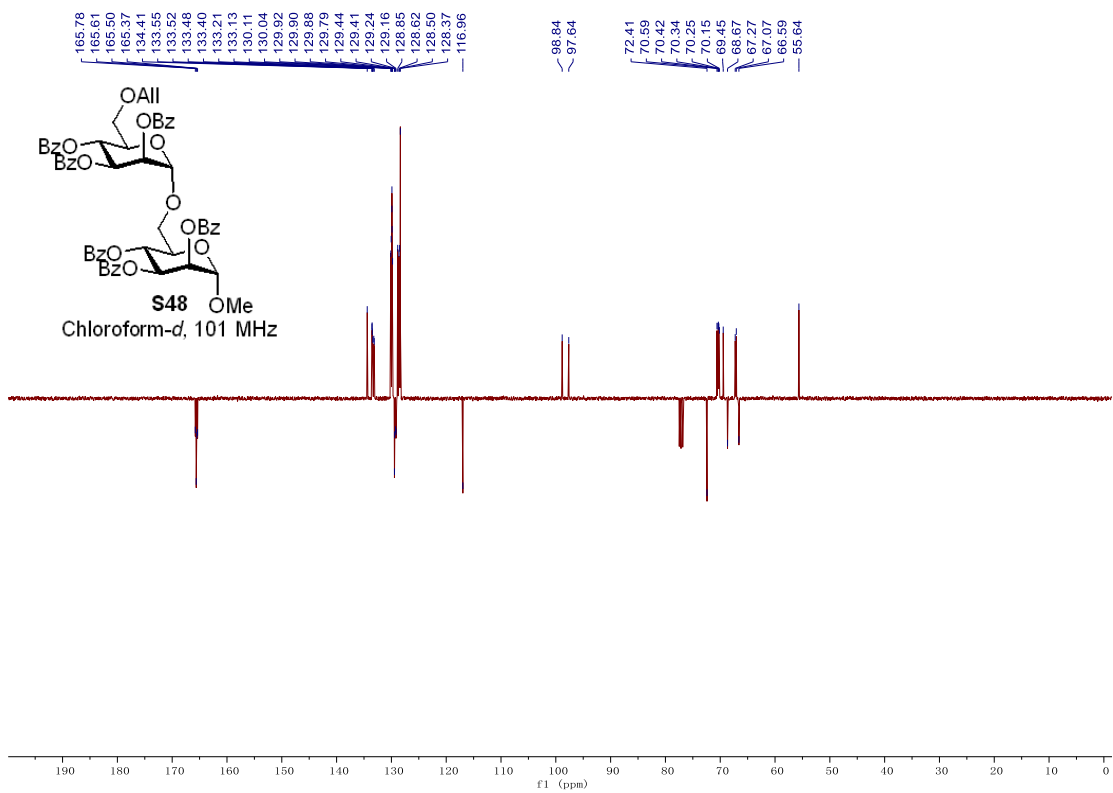

**<sup>13</sup>C NMR Spectra of compound S48**



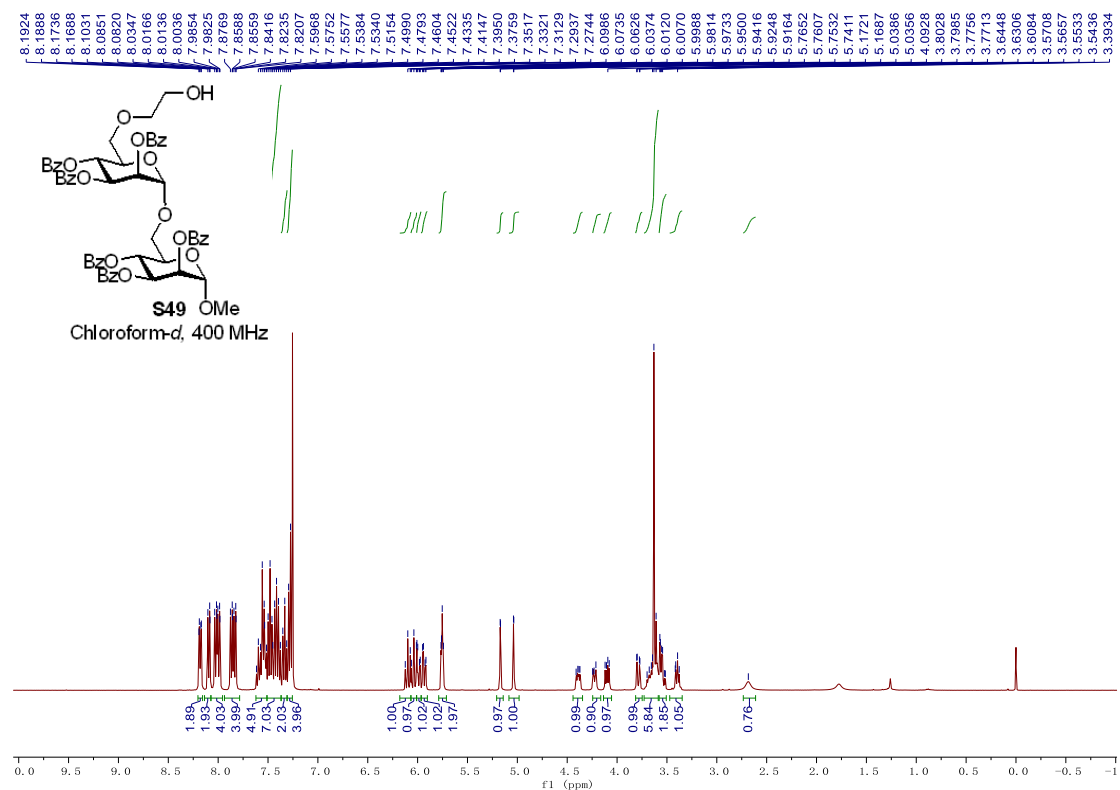

**<sup>1</sup>H NMR Spectra of compound S49**

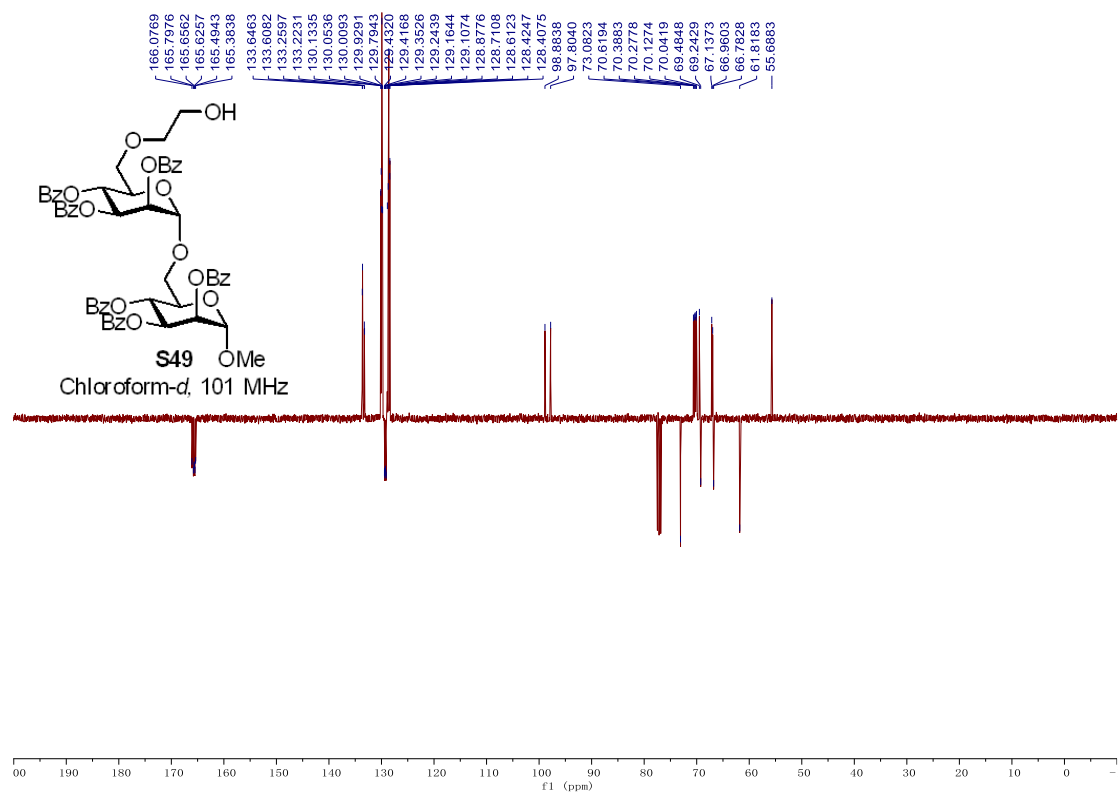

**<sup>13</sup>C NMR Spectra of compound S49**

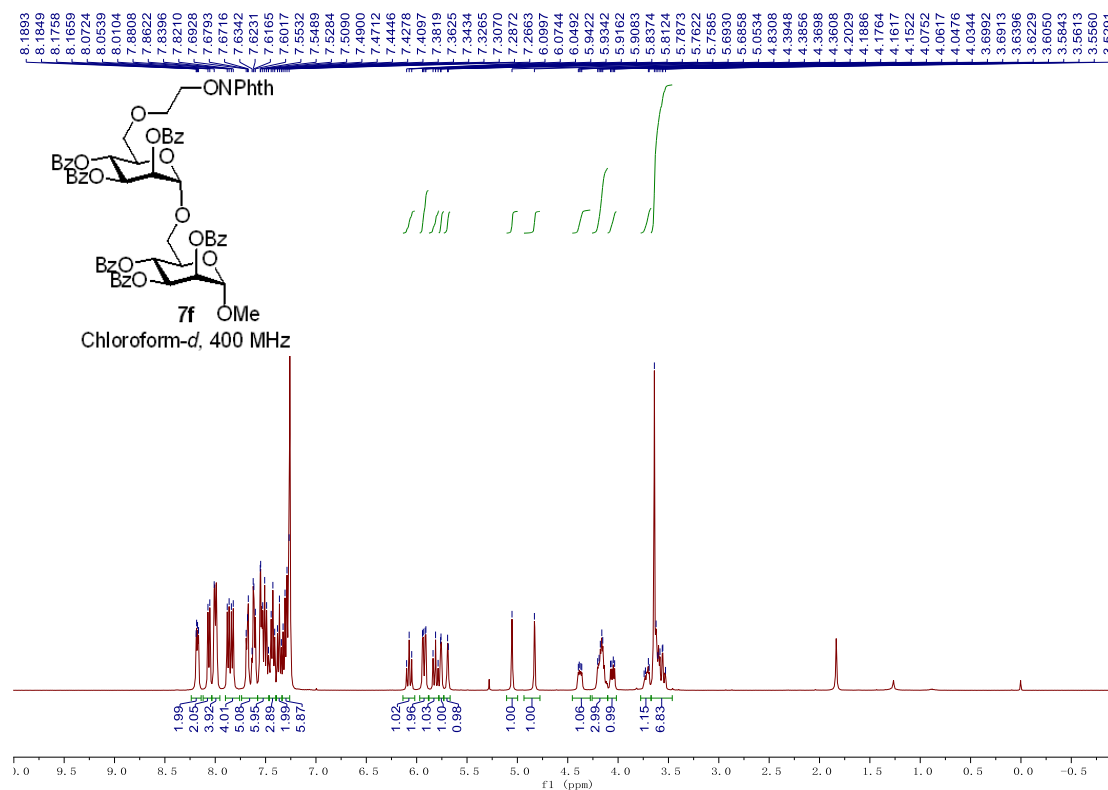

$^1\text{H}$  NMR Spectra of compound **7f**

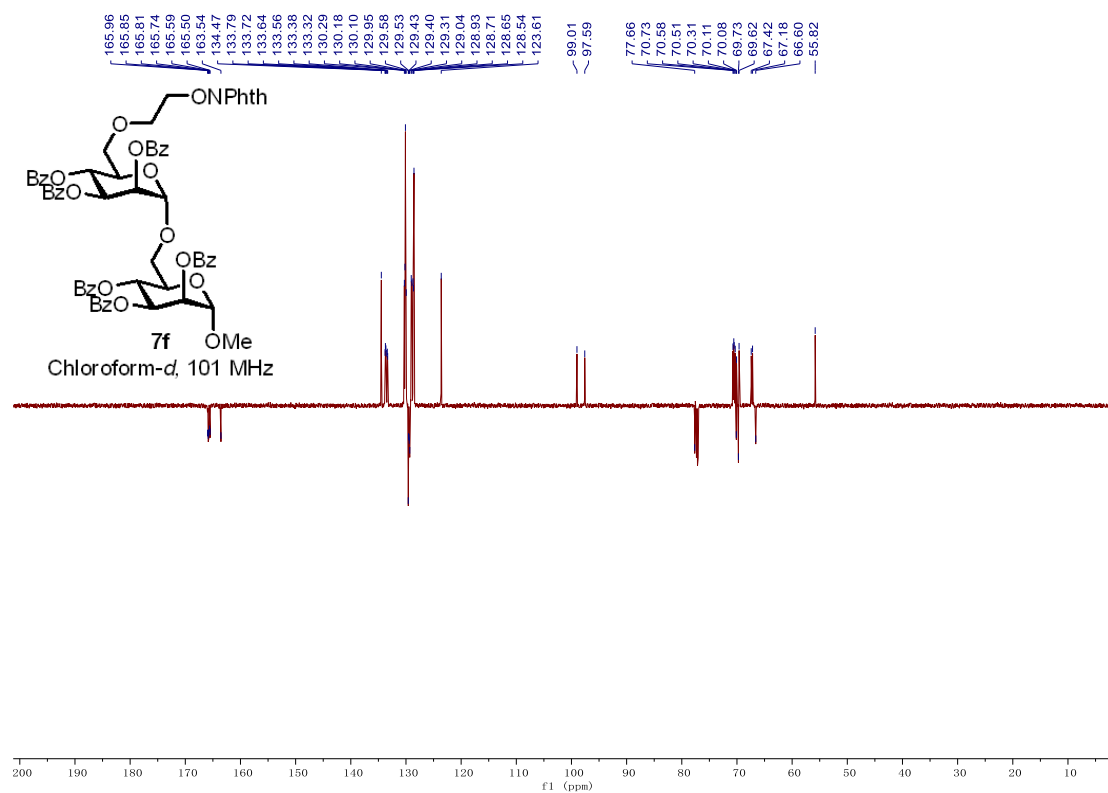

$^{13}\text{C}$  NMR Spectra of compound **7f**

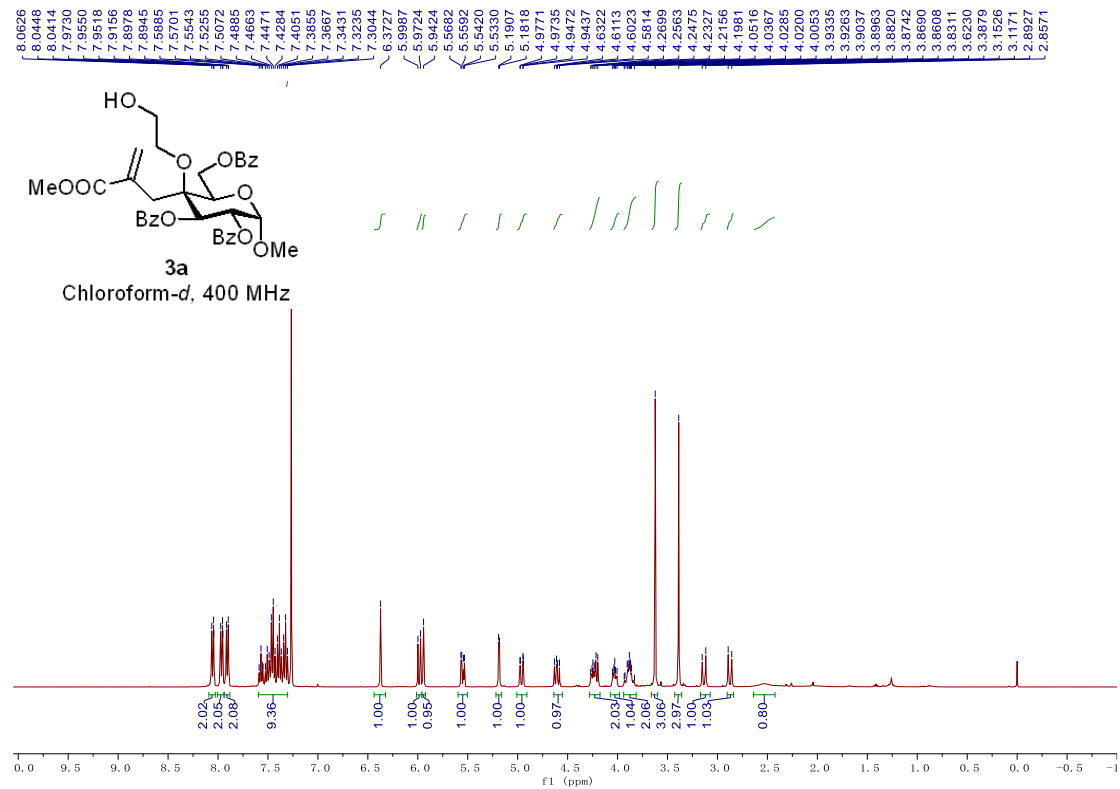

**<sup>1</sup>H NMR Spectra of compound 3a**

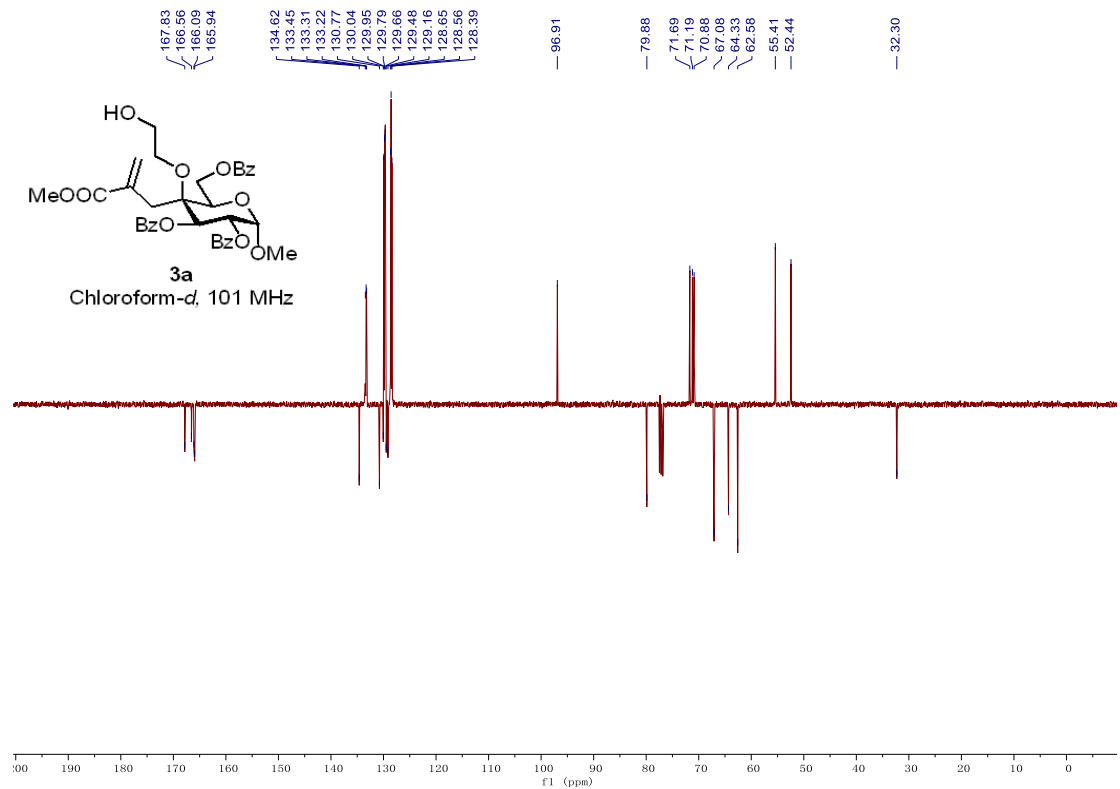

**<sup>13</sup>C NMR Spectra of compound 3a**

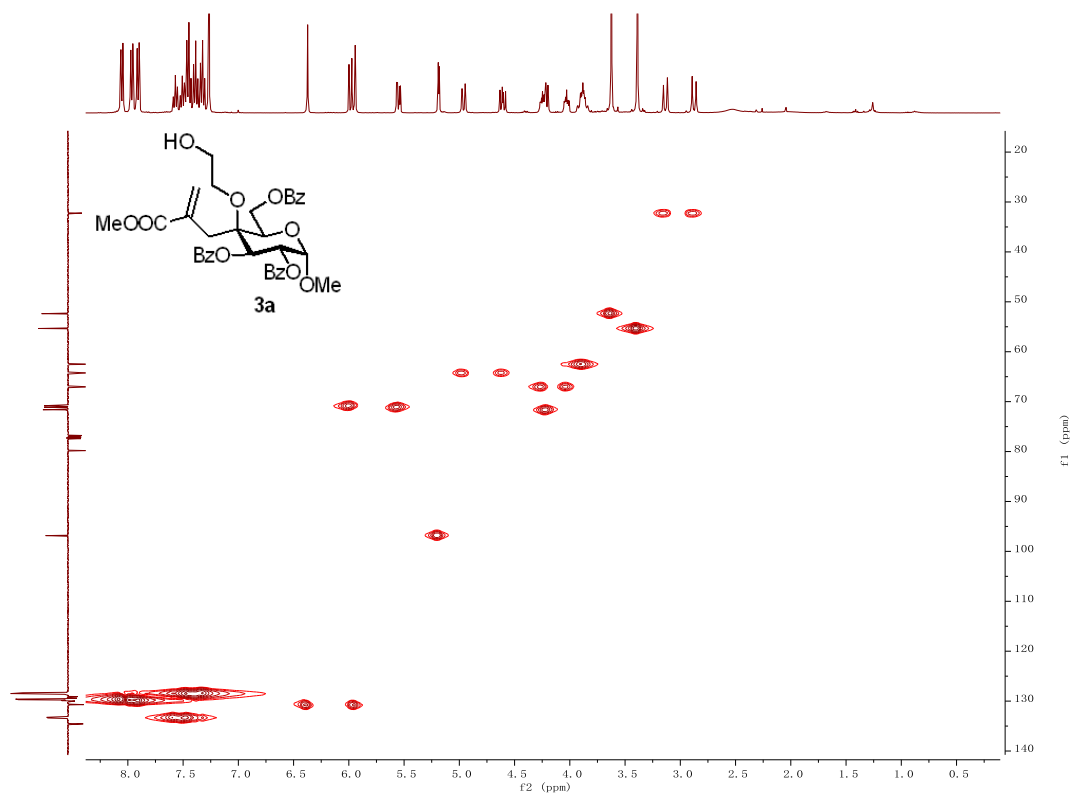

**HSQC NMR Spectra of compound 3a**

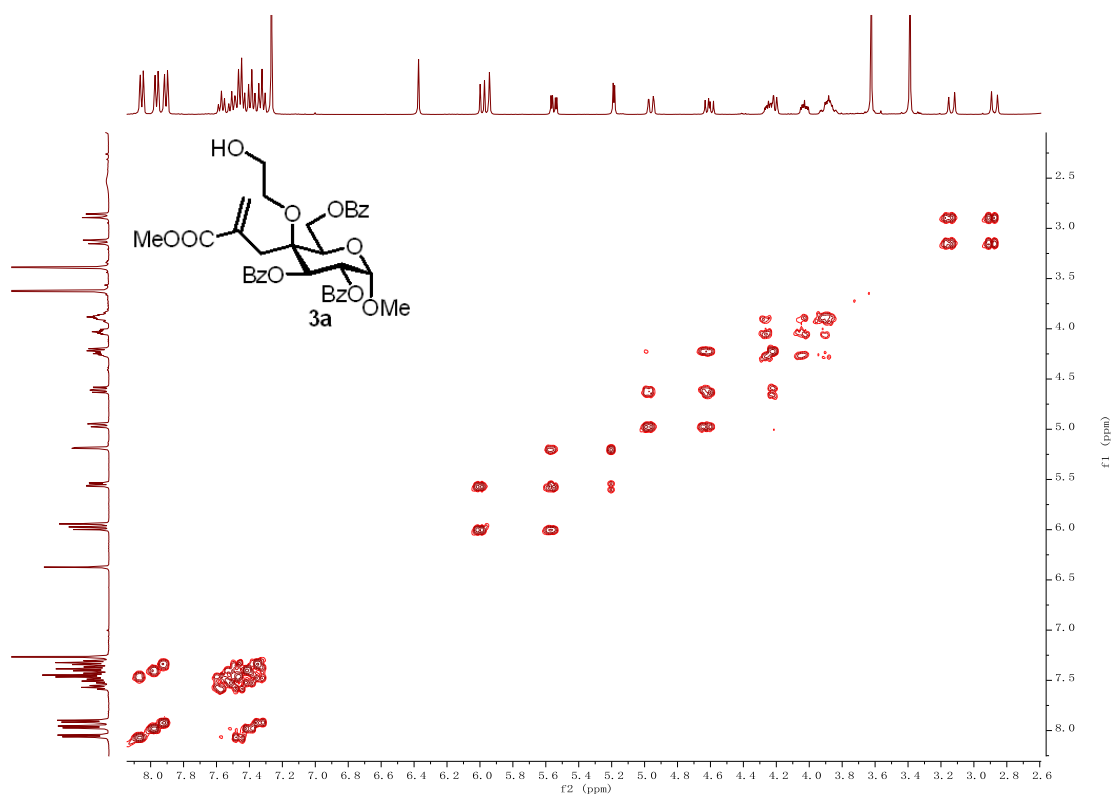

**COSY NMR Spectra of compound 3a**

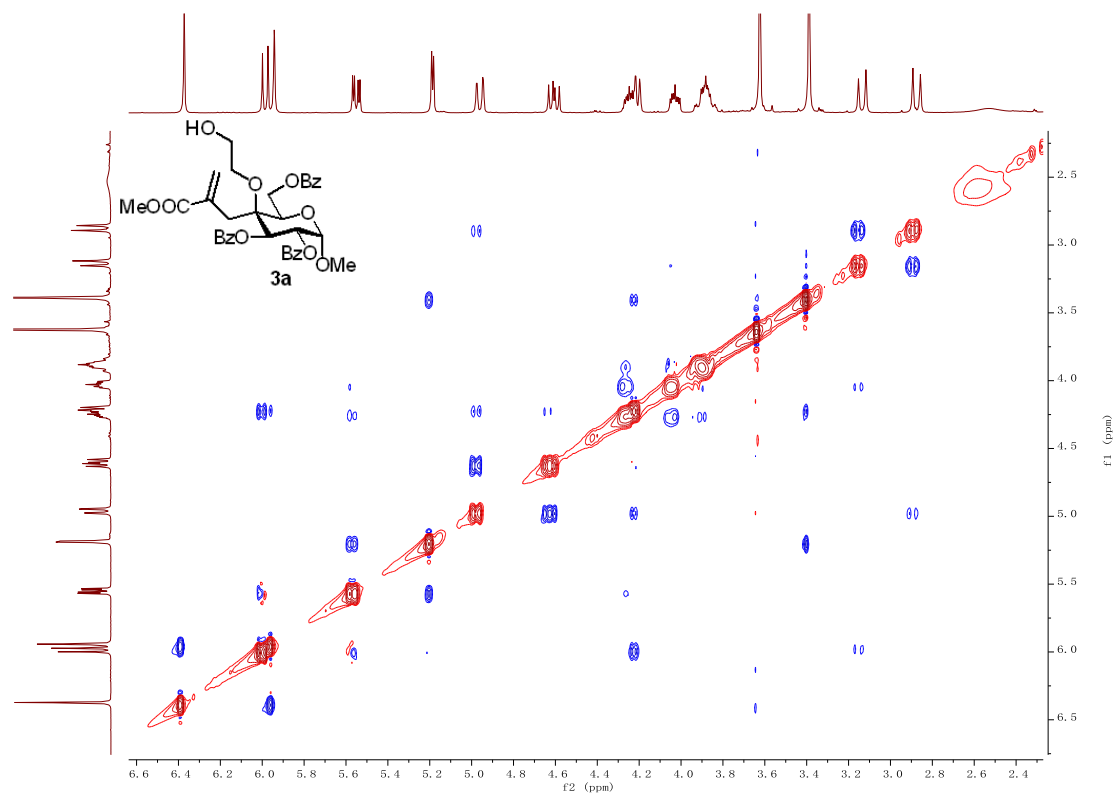

NOESY NMR Spectra of compound 3a

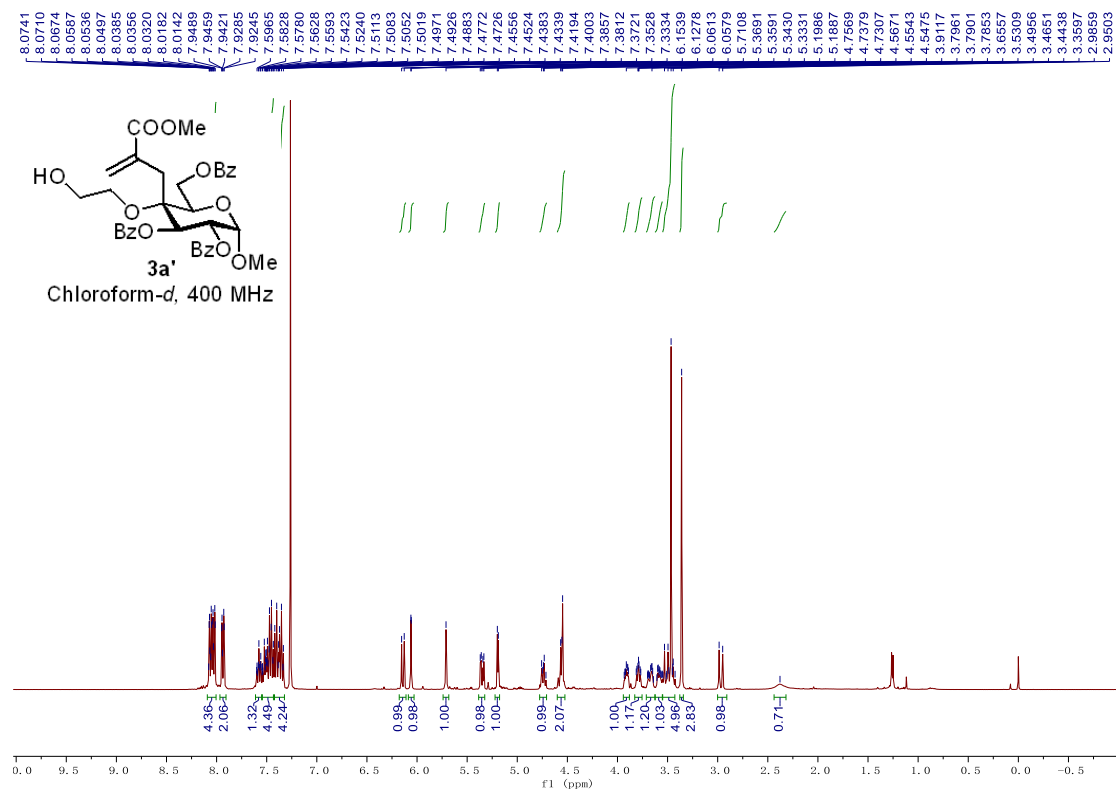

<sup>1</sup>H NMR Spectra of compound 3a'

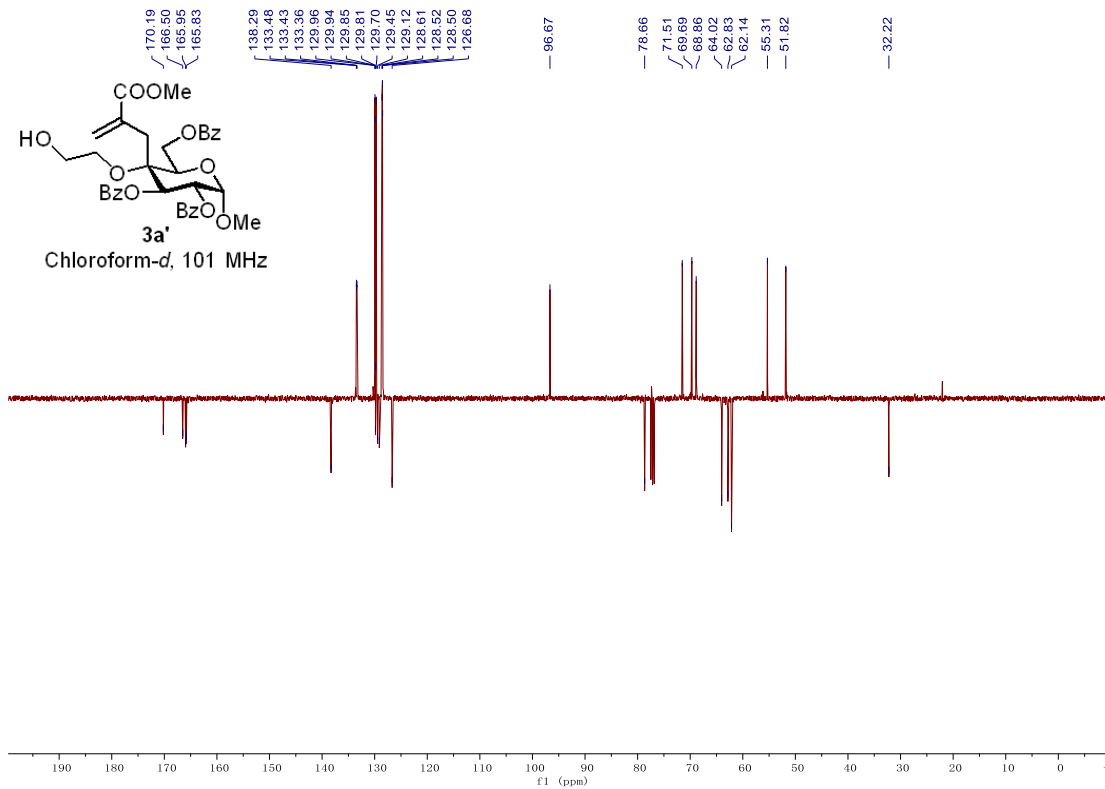

**<sup>13</sup>C NMR Spectra of compound 3a'**

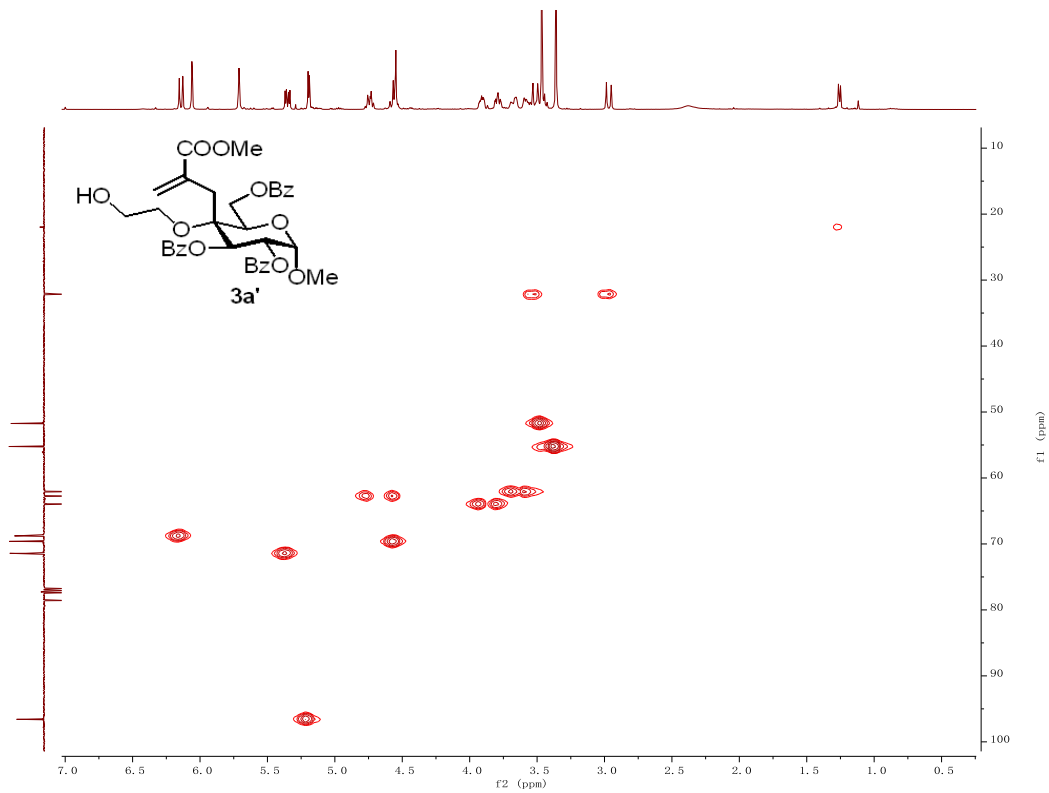

**HSQC NMR Spectra of compound 3a'**

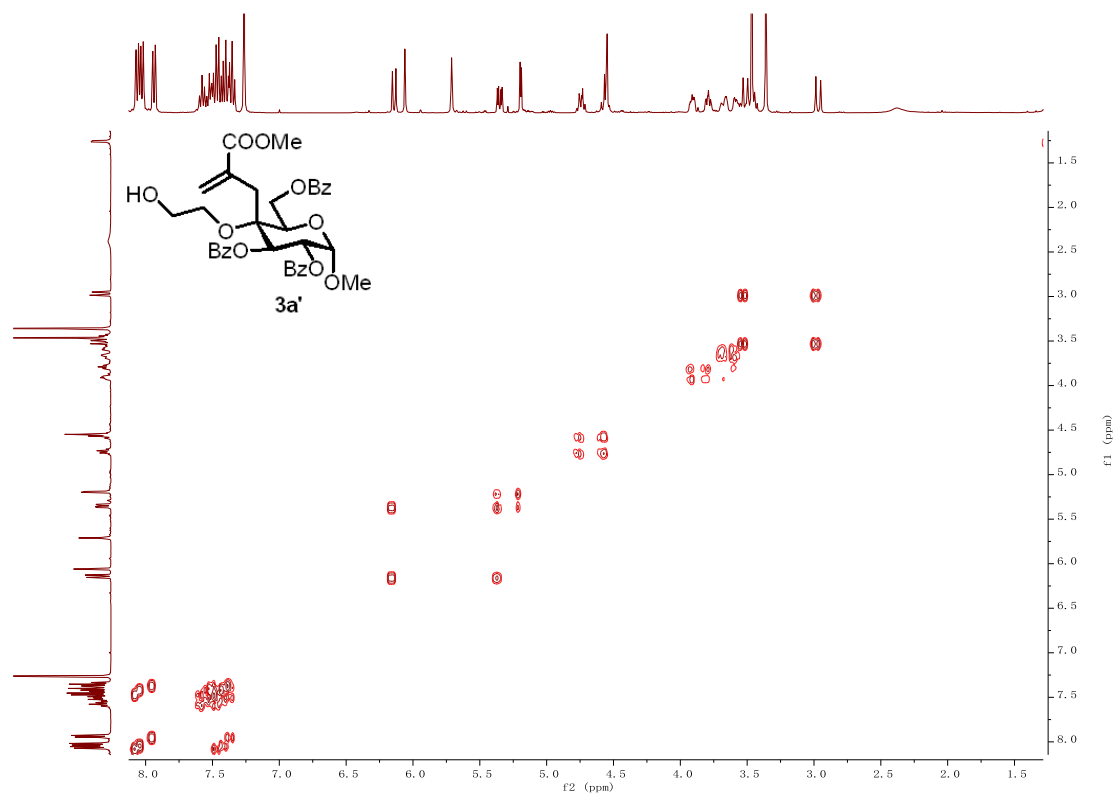

**COSY NMR Spectra of compound 3a'**

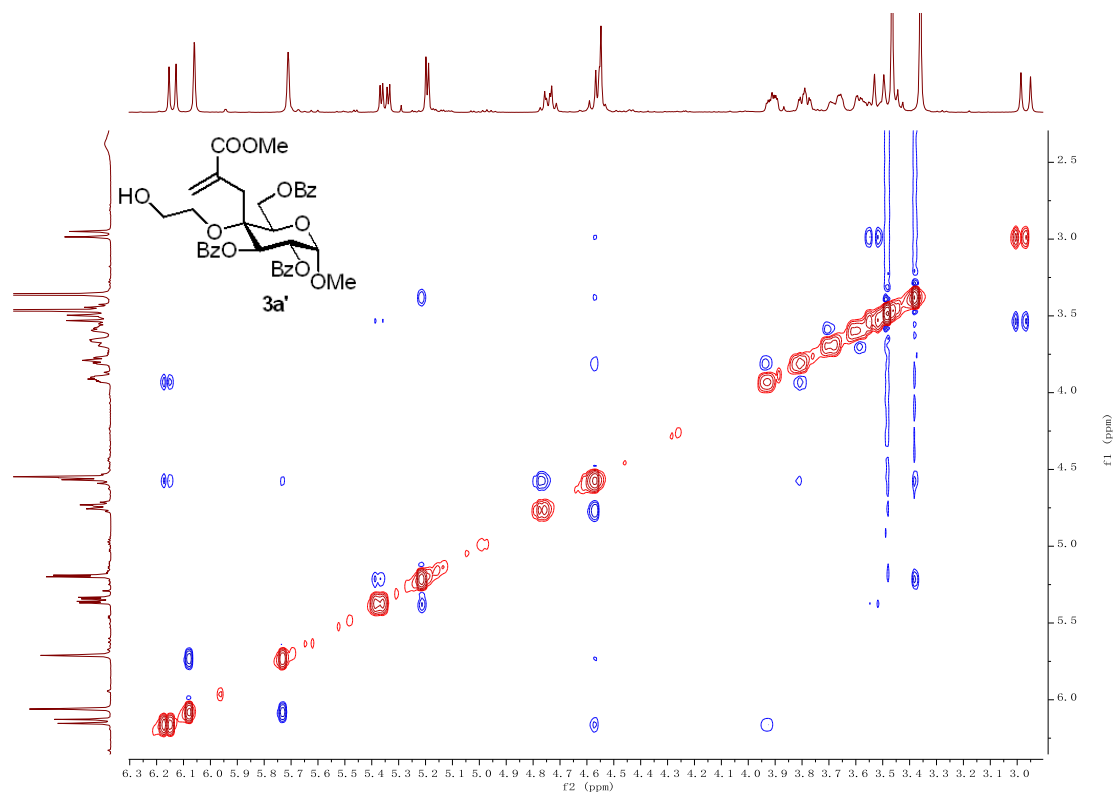

**NOESY NMR Spectra of compound 3a'**

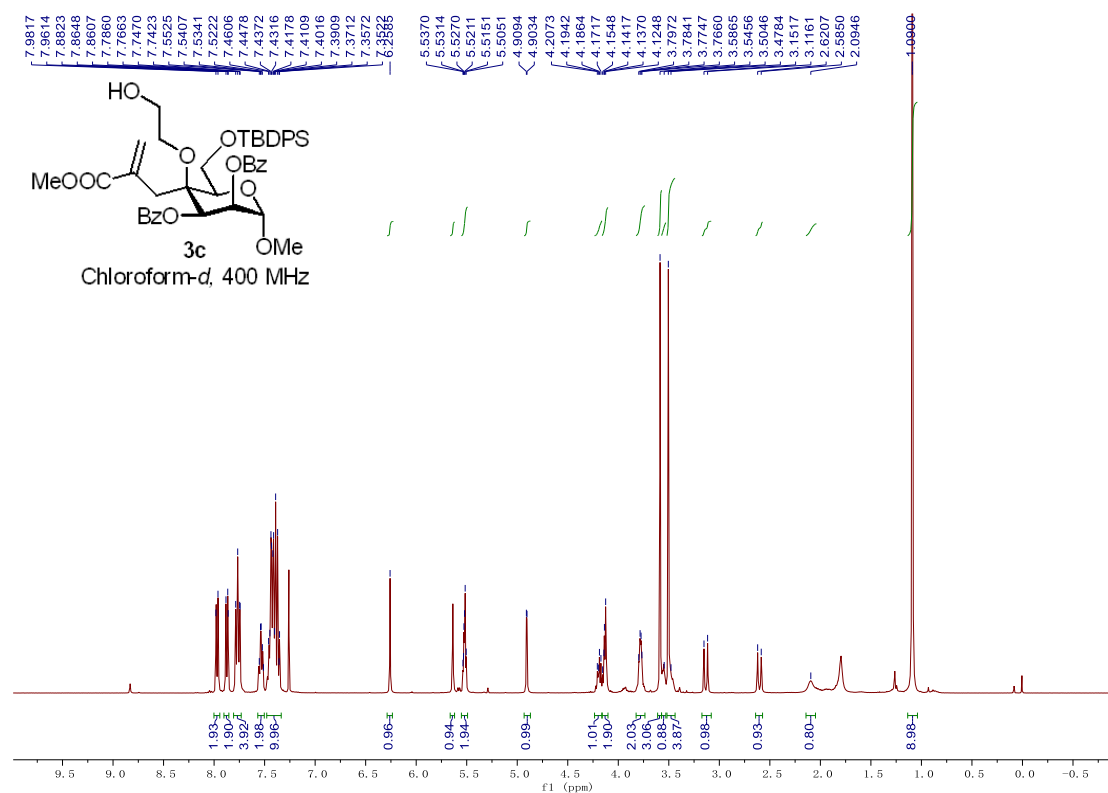

**<sup>1</sup>H NMR Spectra of compound 3c**

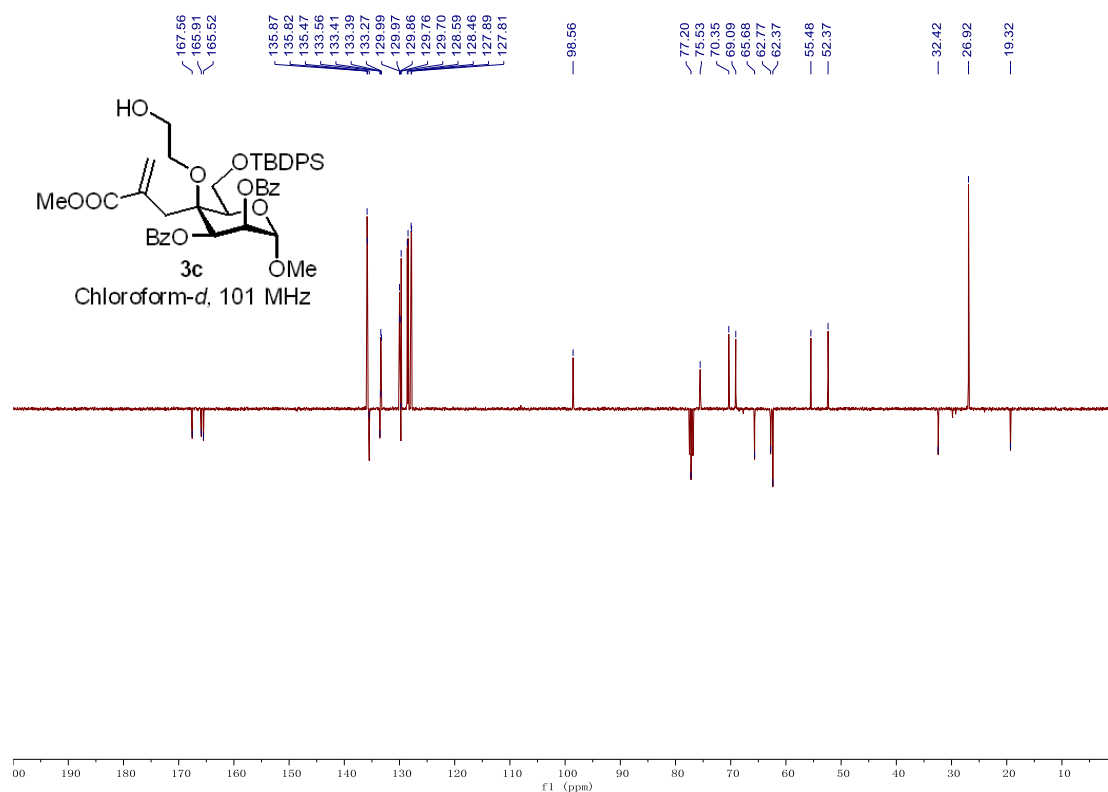

**<sup>13</sup>C NMR Spectra of compound 3c**



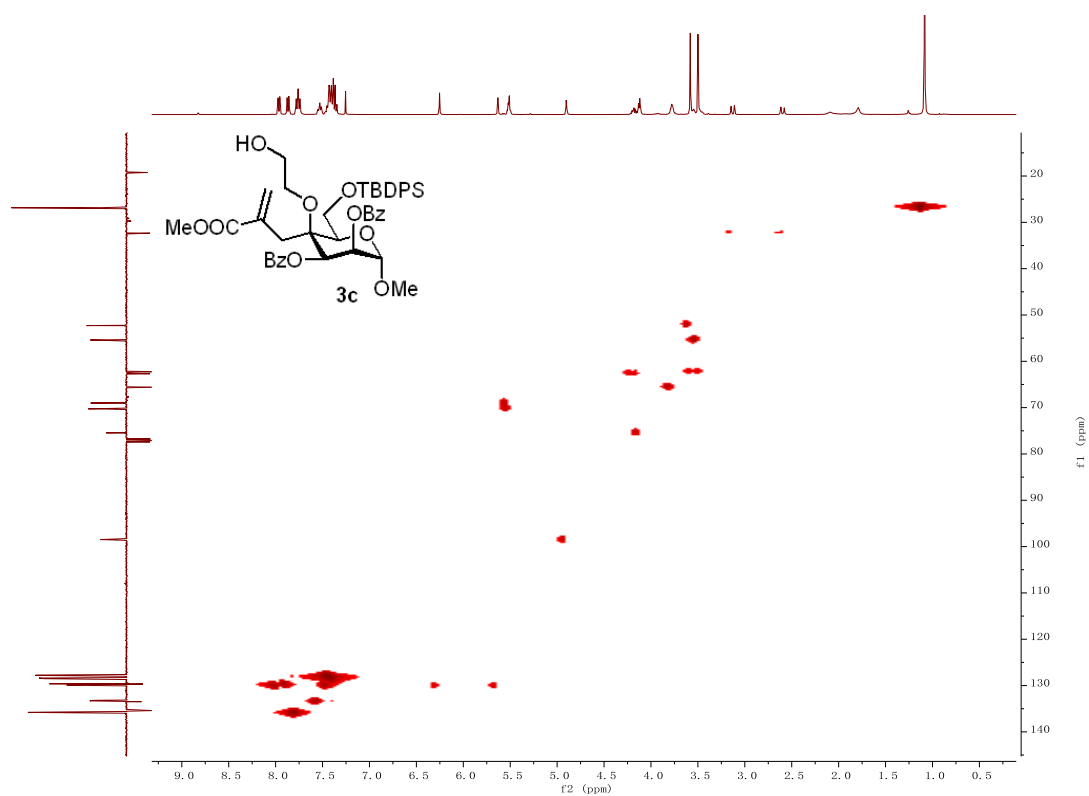

HSQC Spectra of compound 3c

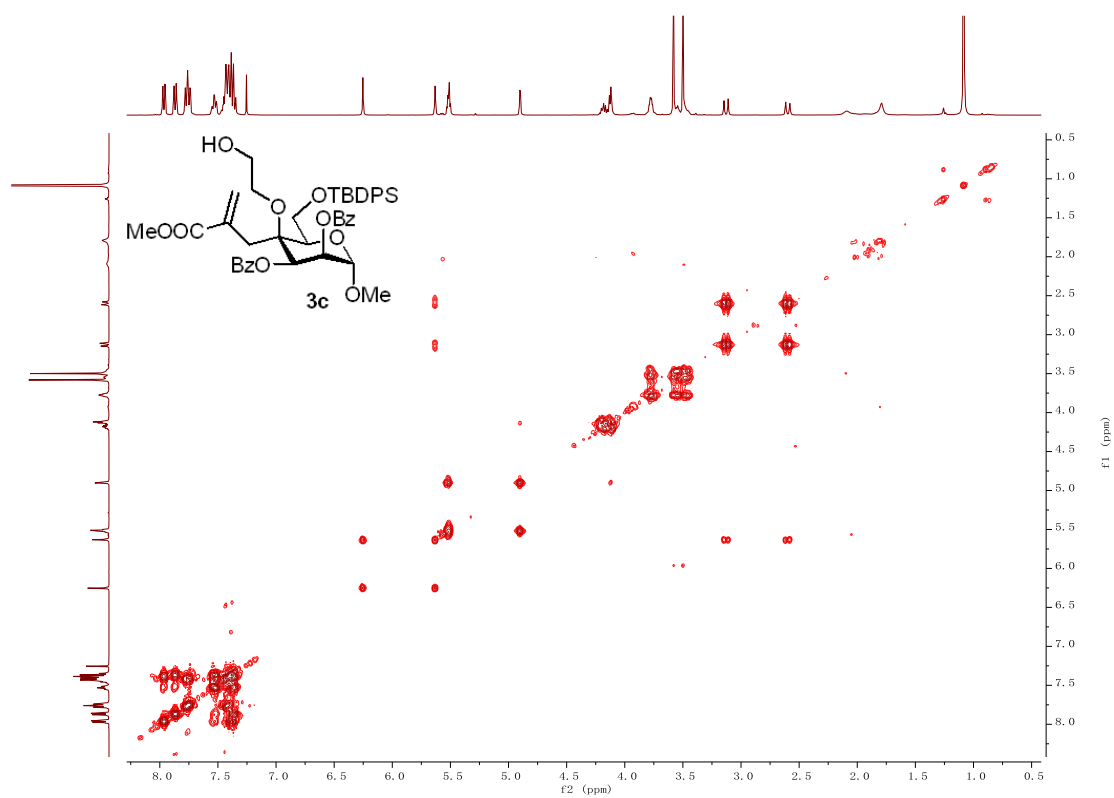

### COSY Spectra of compound 3c

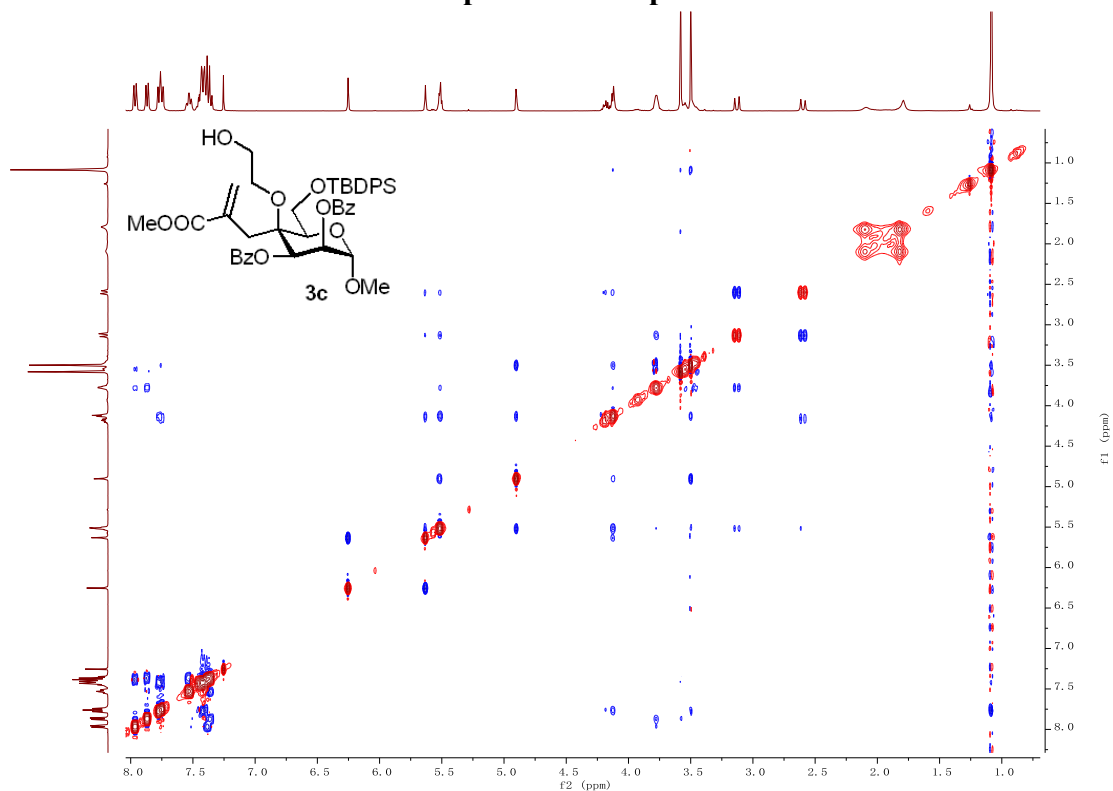

### NOESY Spectra of compound 3c

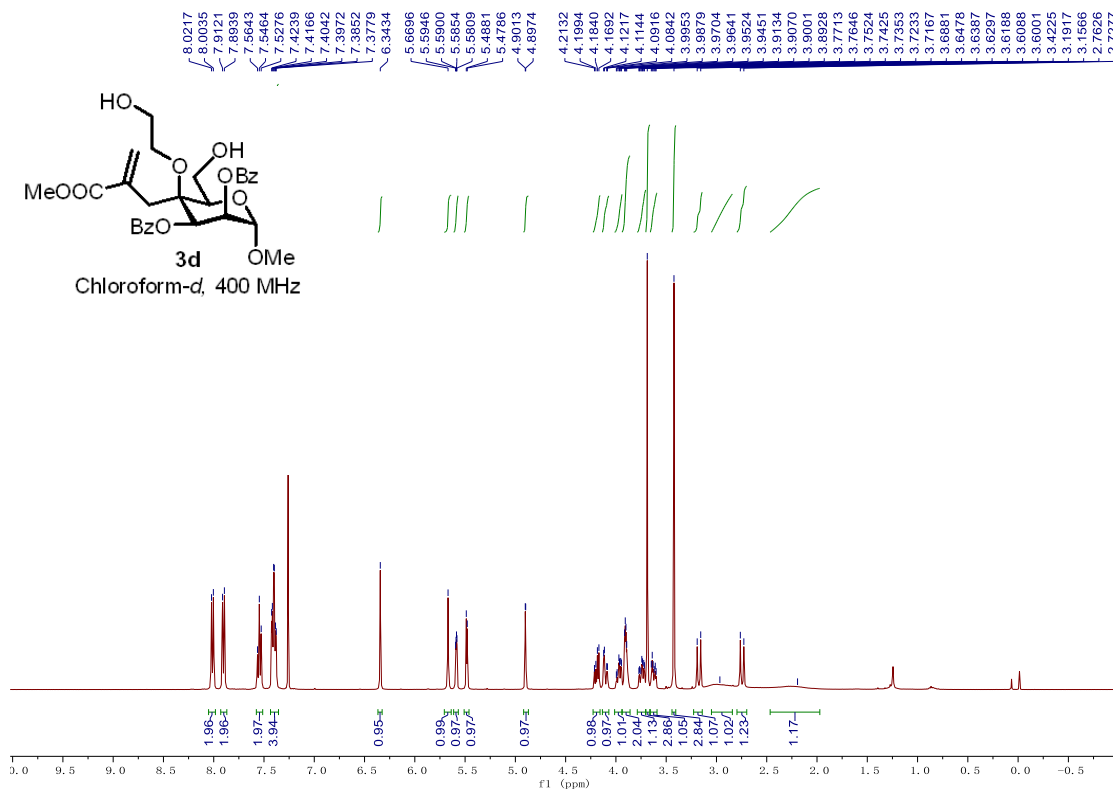

### <sup>1</sup>H NMR Spectra of compound 3d

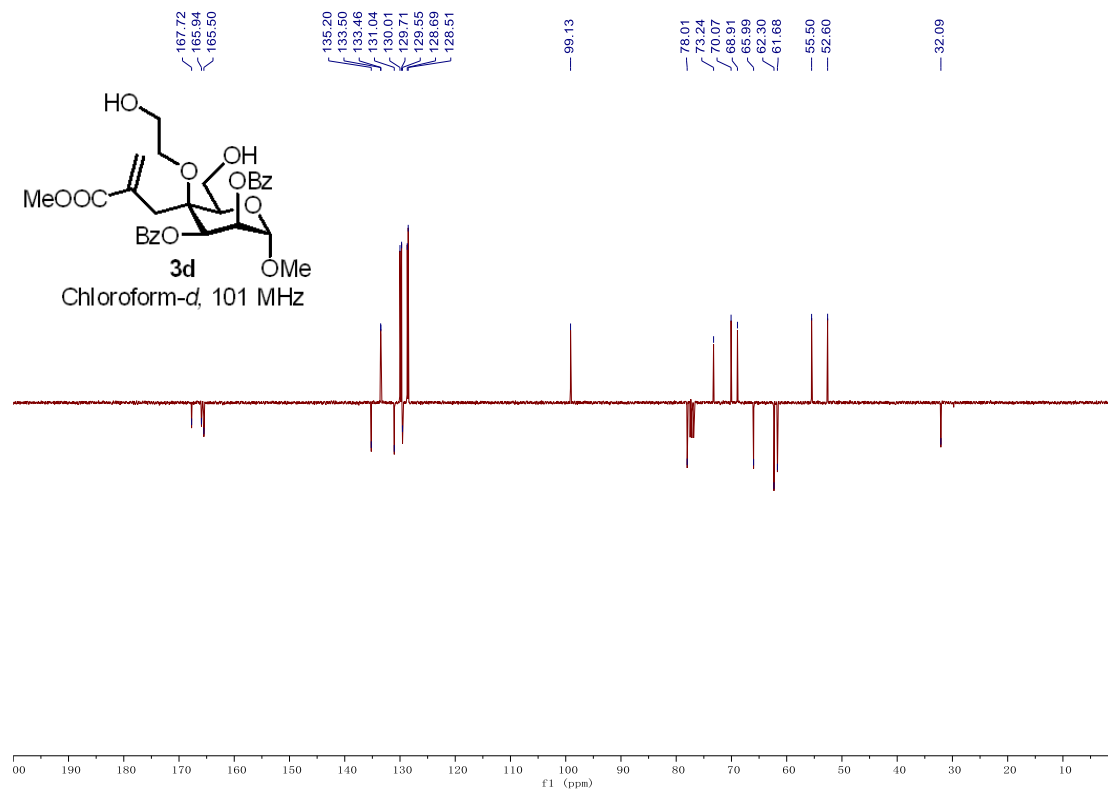

### $^{13}\text{C}$ NMR Spectra of compound **3d**

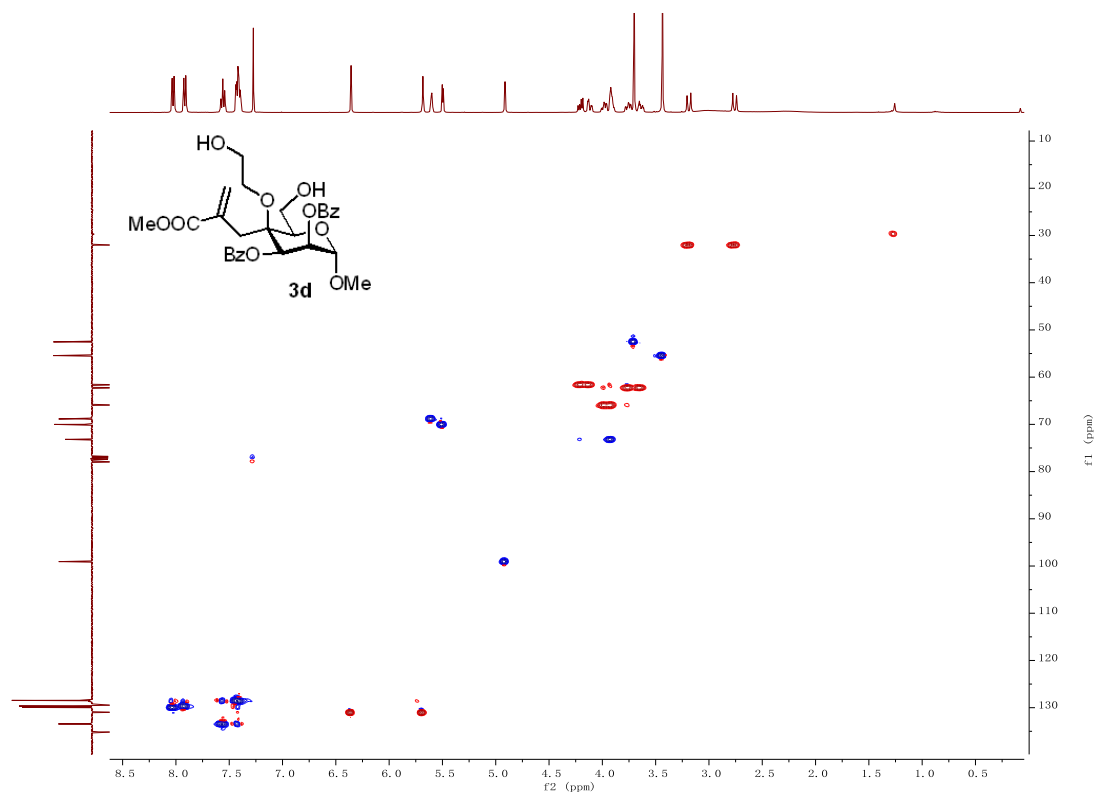

### HSQC Spectra of compound **3d**

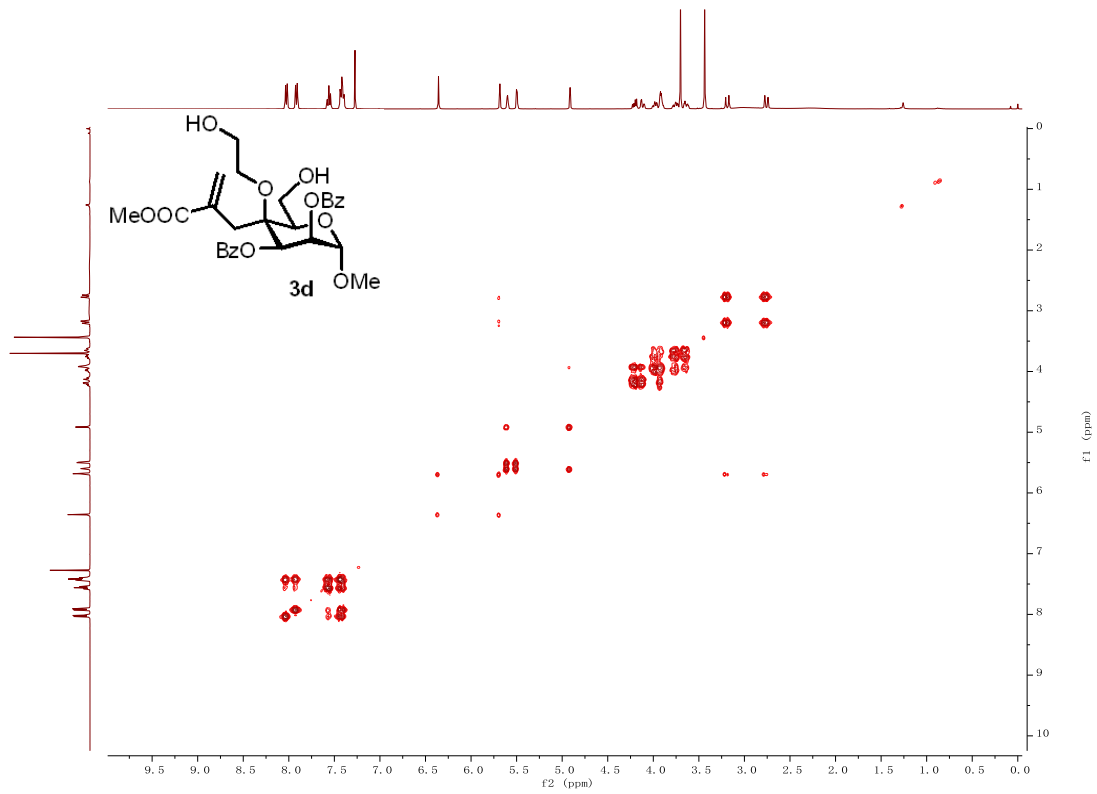

**COSY Spectra of compound 3d**

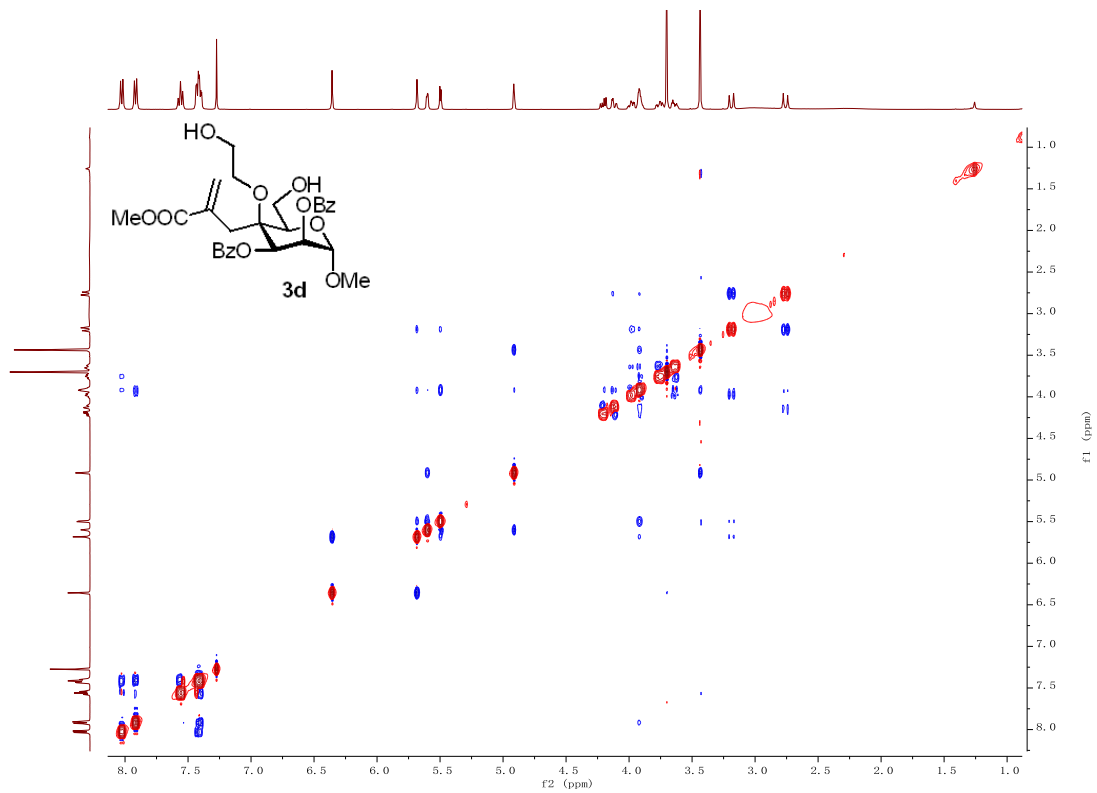

**NOESY Spectra of compound 3d**

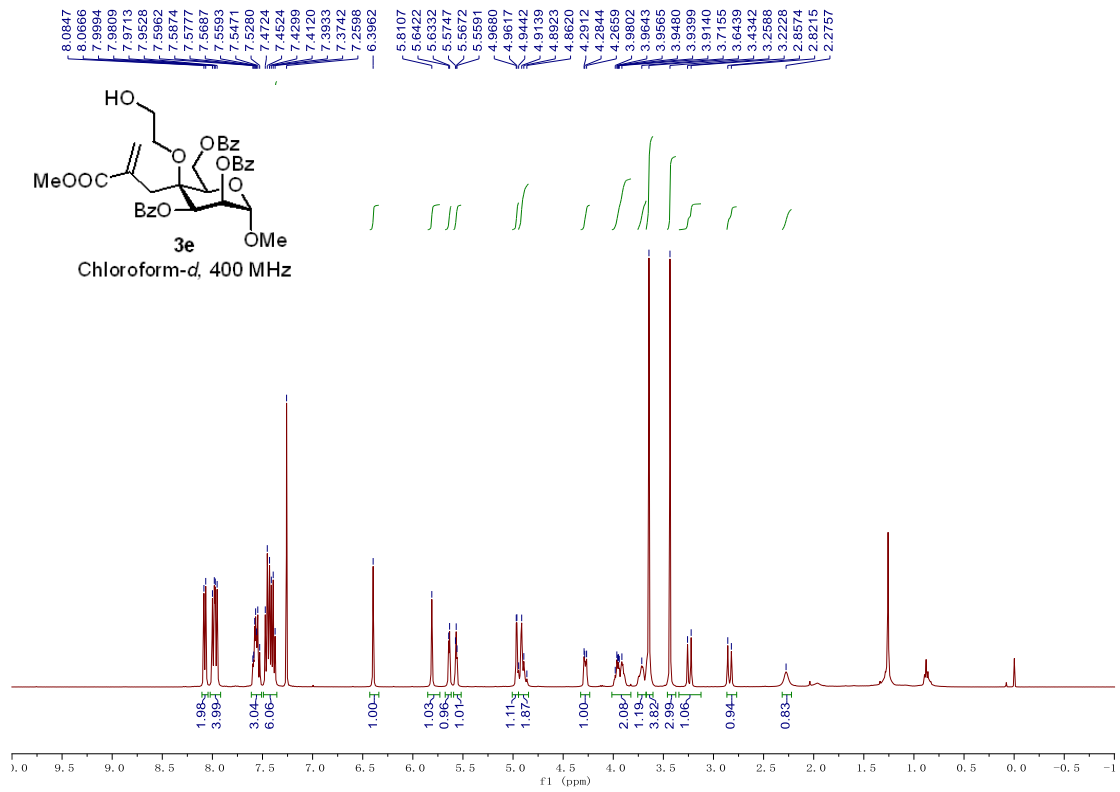

**<sup>1</sup>H NMR Spectra of compound 3e**

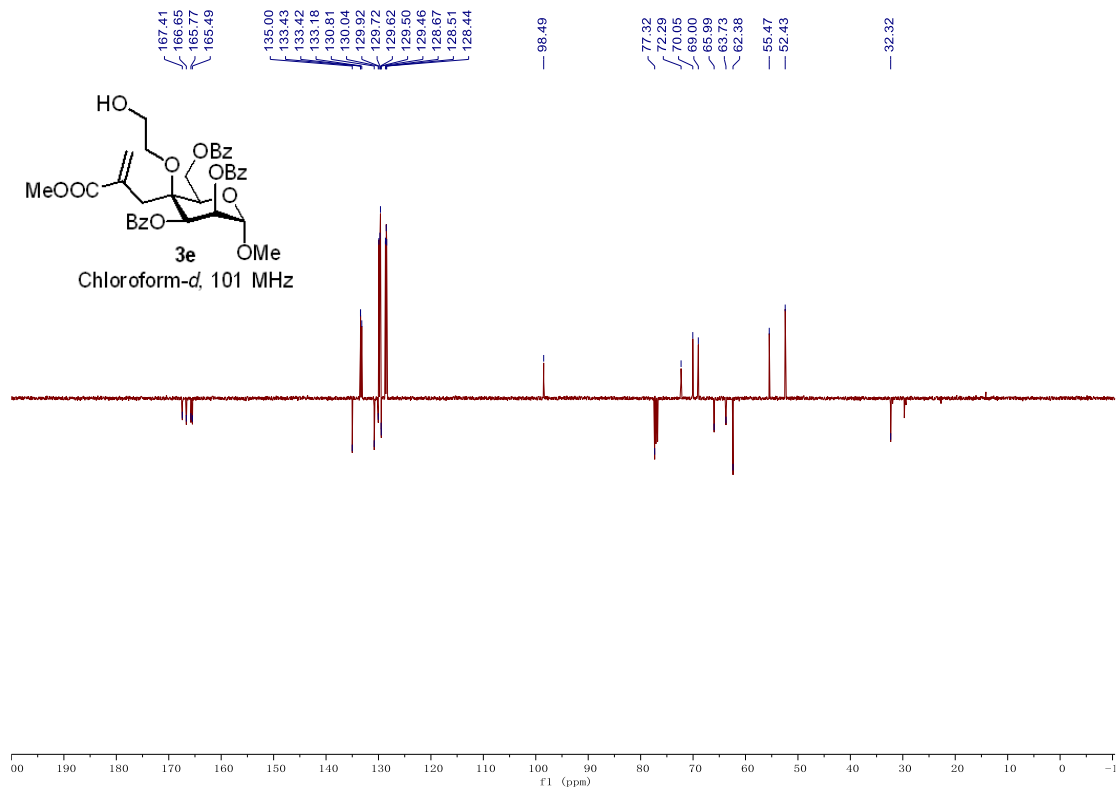

**<sup>13</sup>C NMR Spectra of compound 3e**

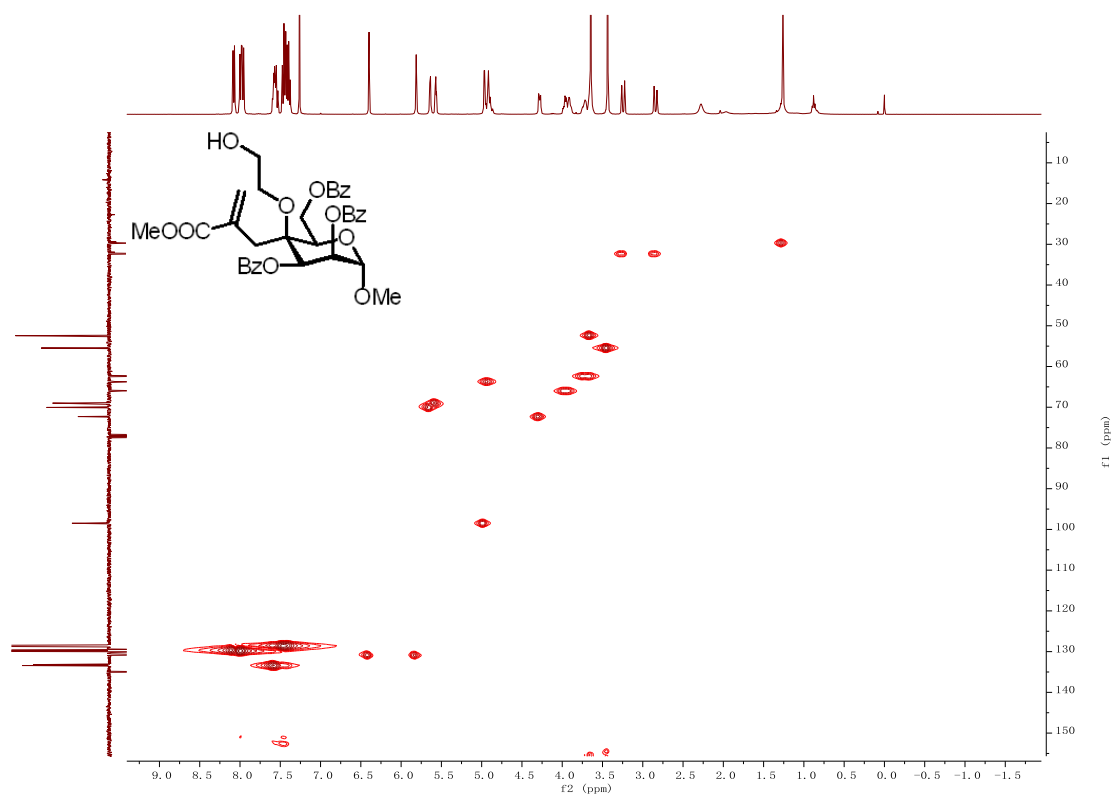

HSQC NMR Spectra of compound 3e

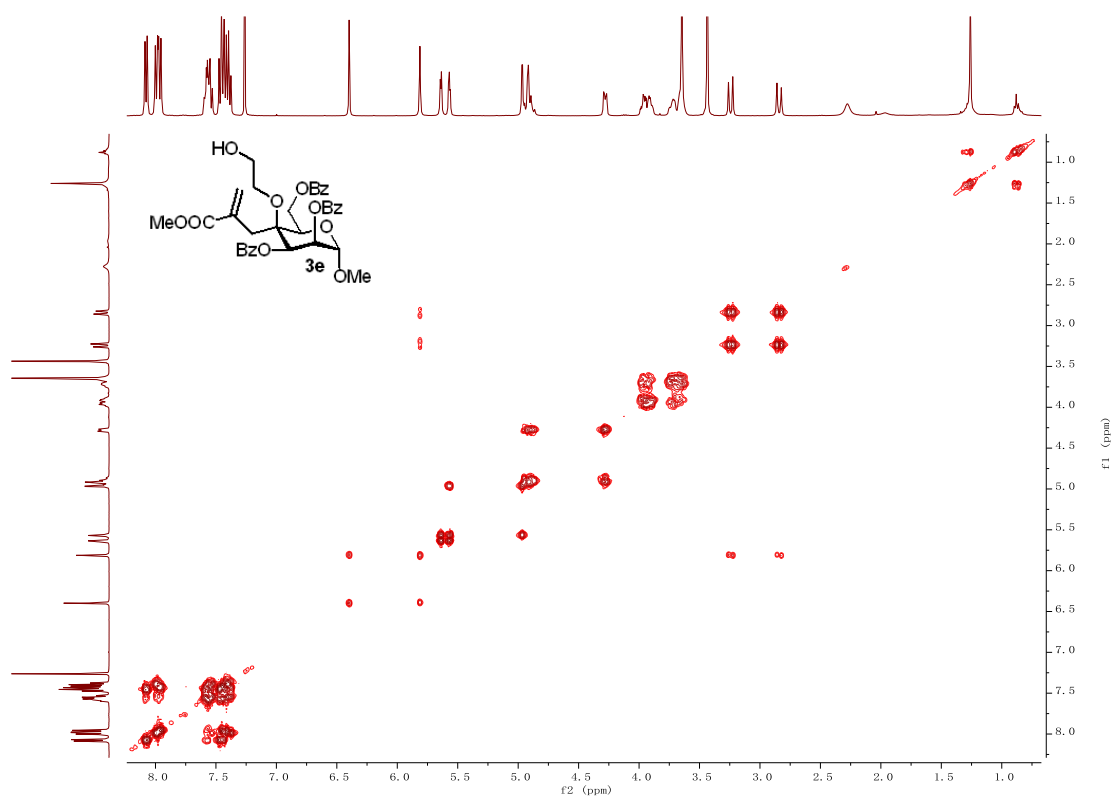

COSY NMR Spectra of compound 3e

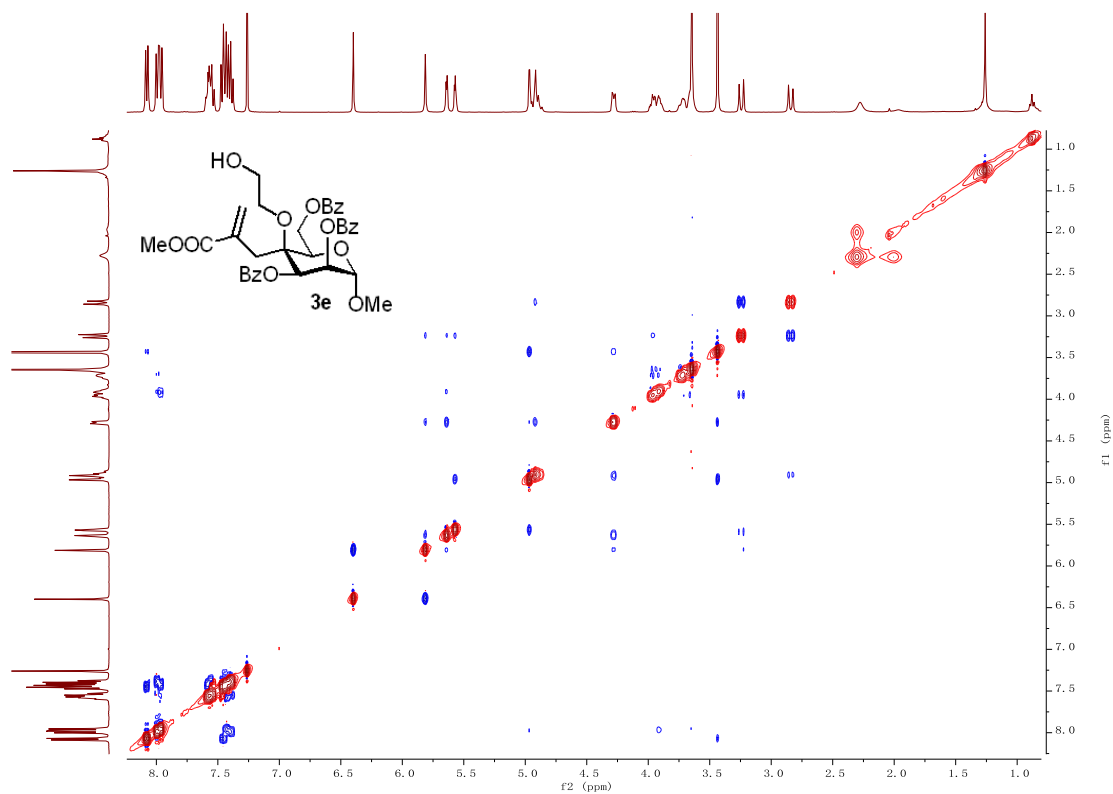

NOESY NMR Spectra of compound 3e

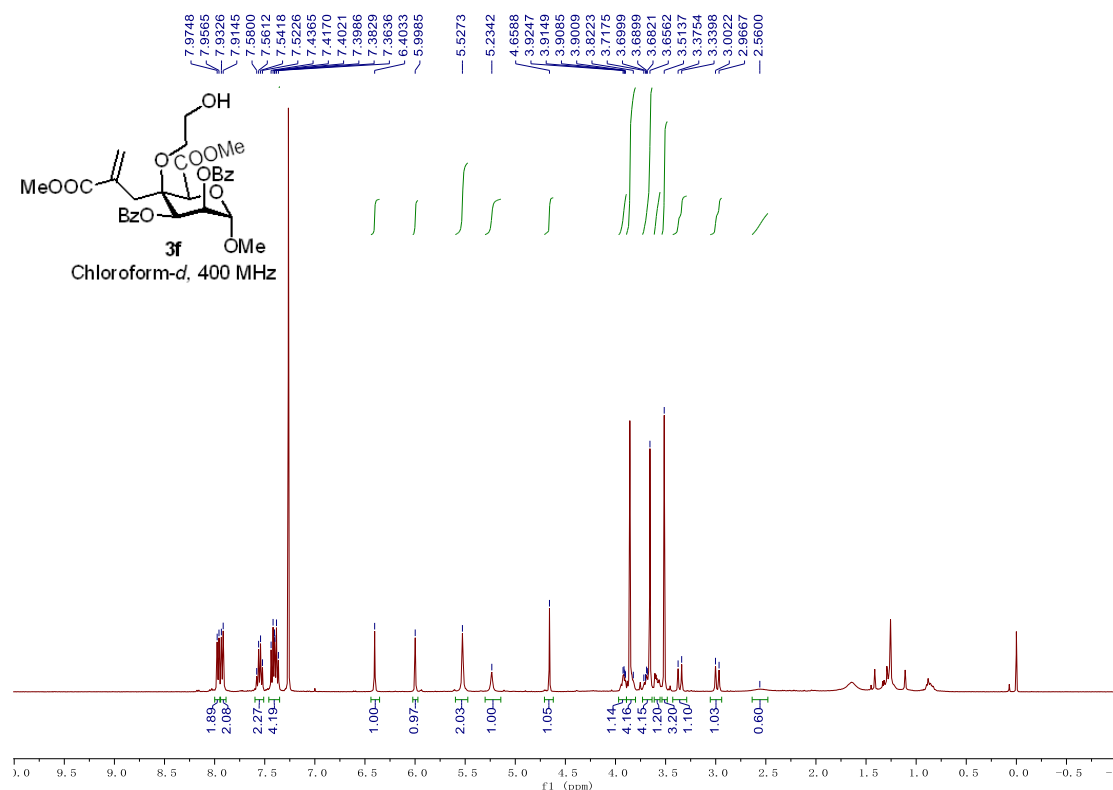

<sup>1</sup>H NMR Spectra of compound 3f

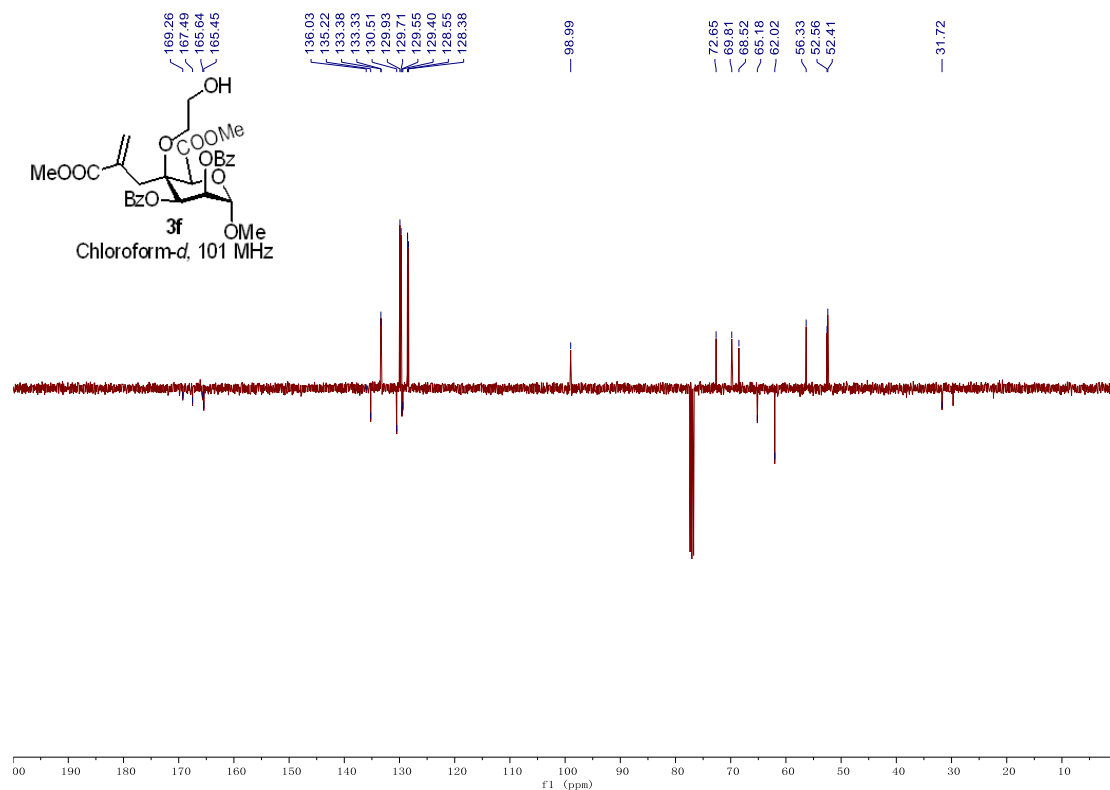

### $^{13}\text{C}$ NMR Spectra of compound 3f

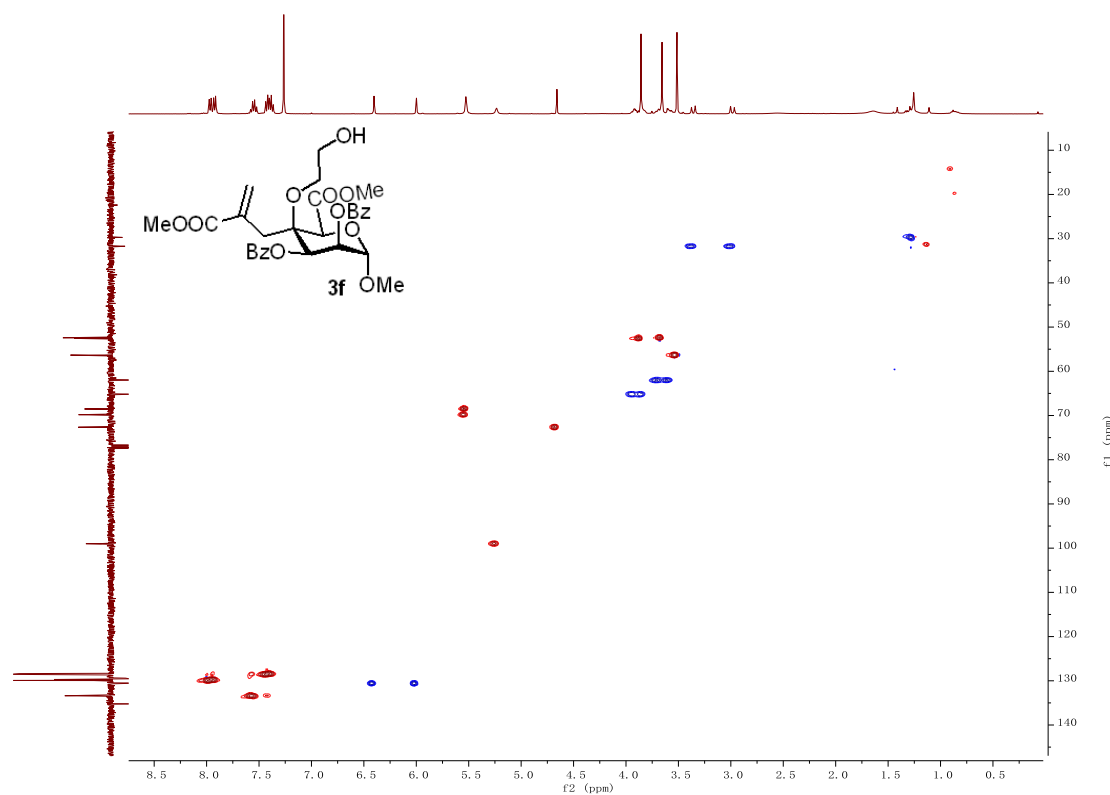

### HSQC NMR Spectra of compound 3f



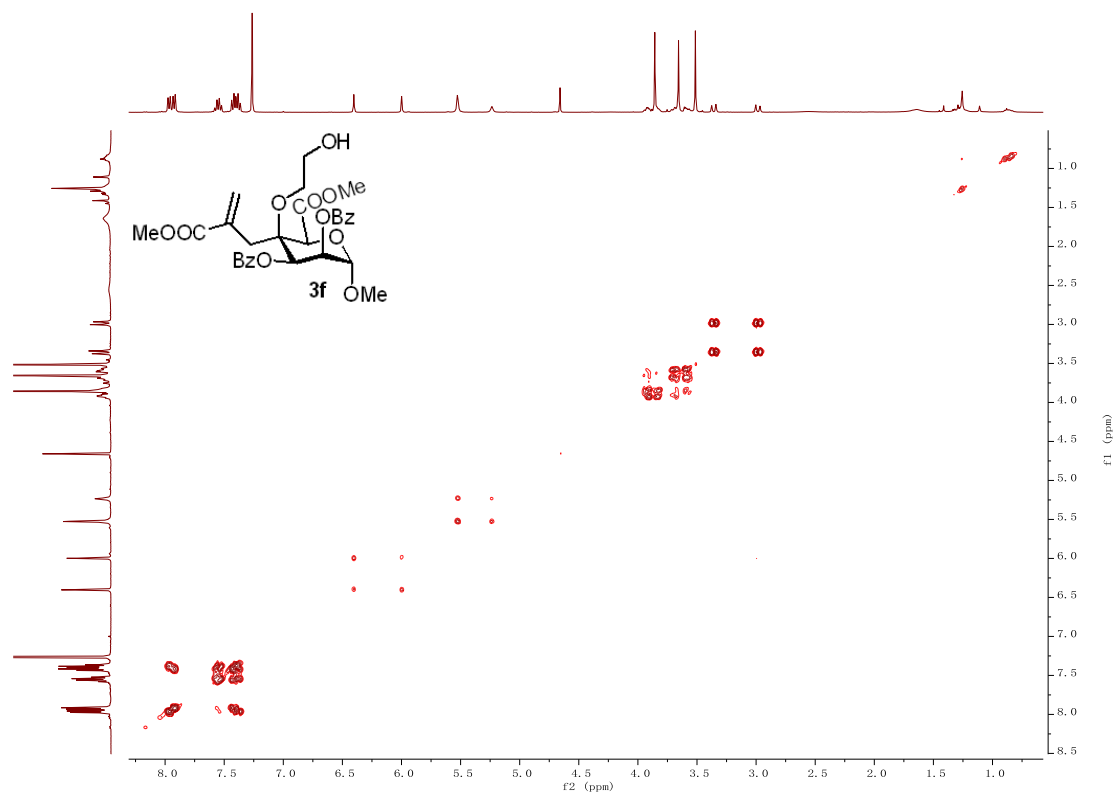

**COSY NMR Spectra of compound 3f**

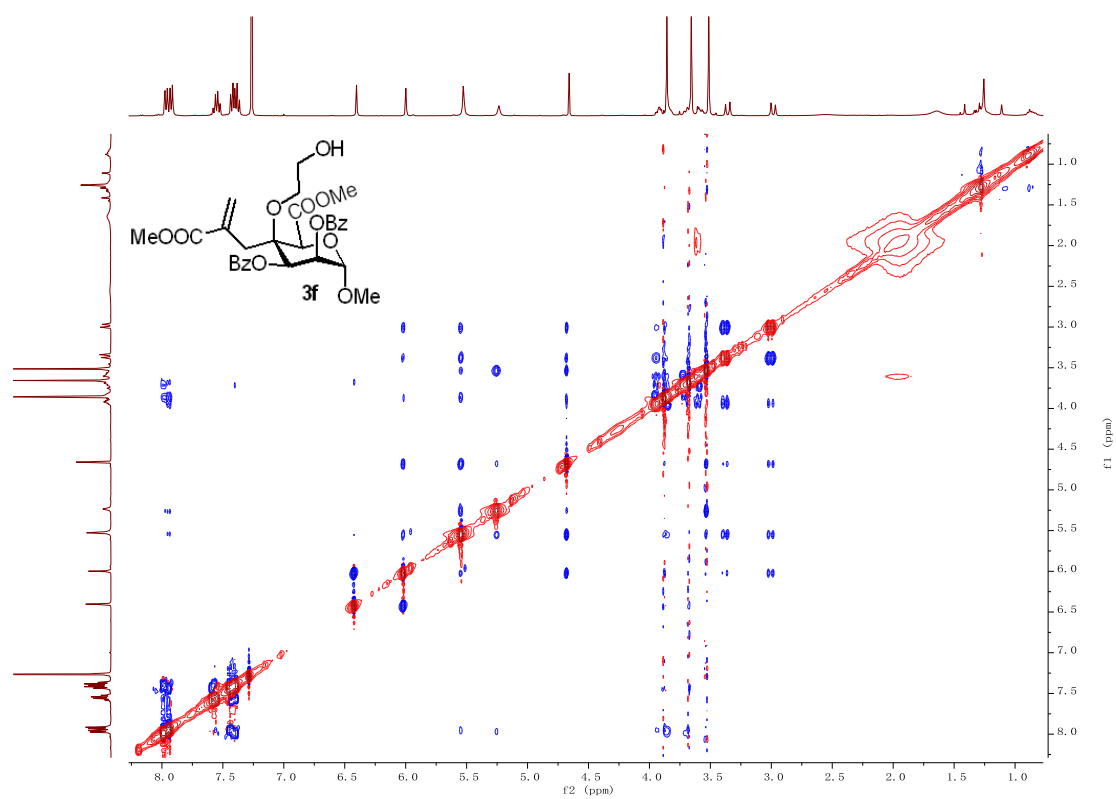

**NOESY NMR Spectra of compound 3f**

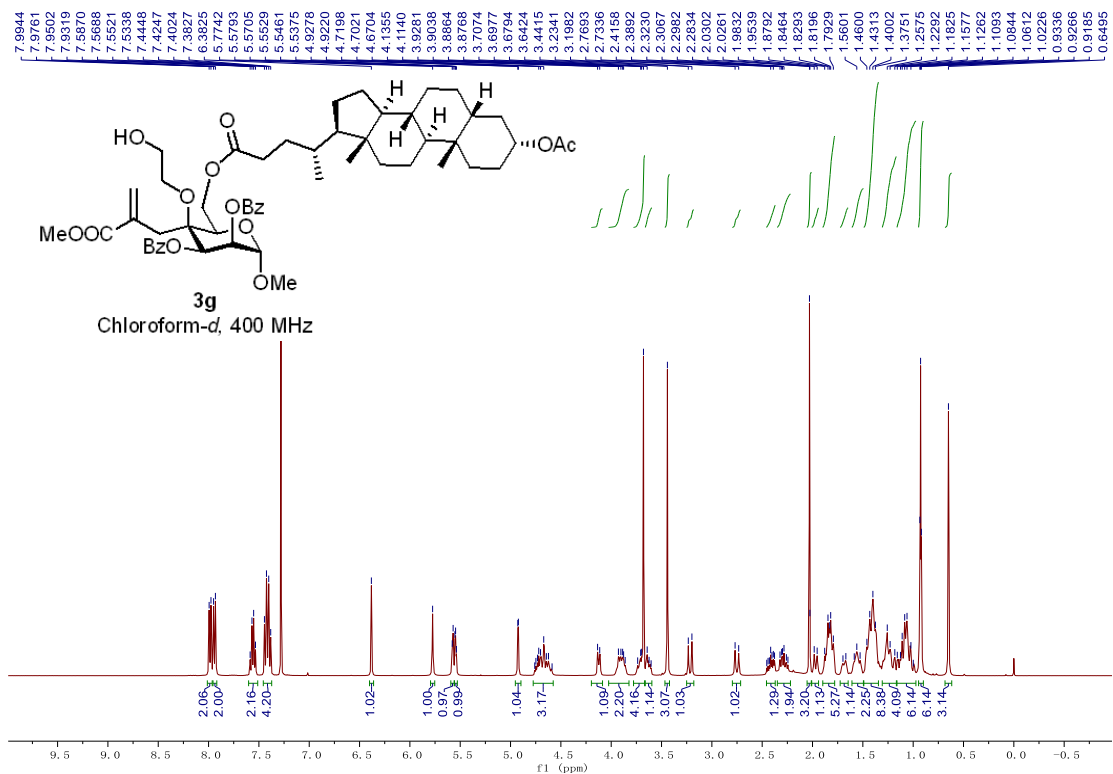

**<sup>1</sup>H NMR Spectra of compound 3g**

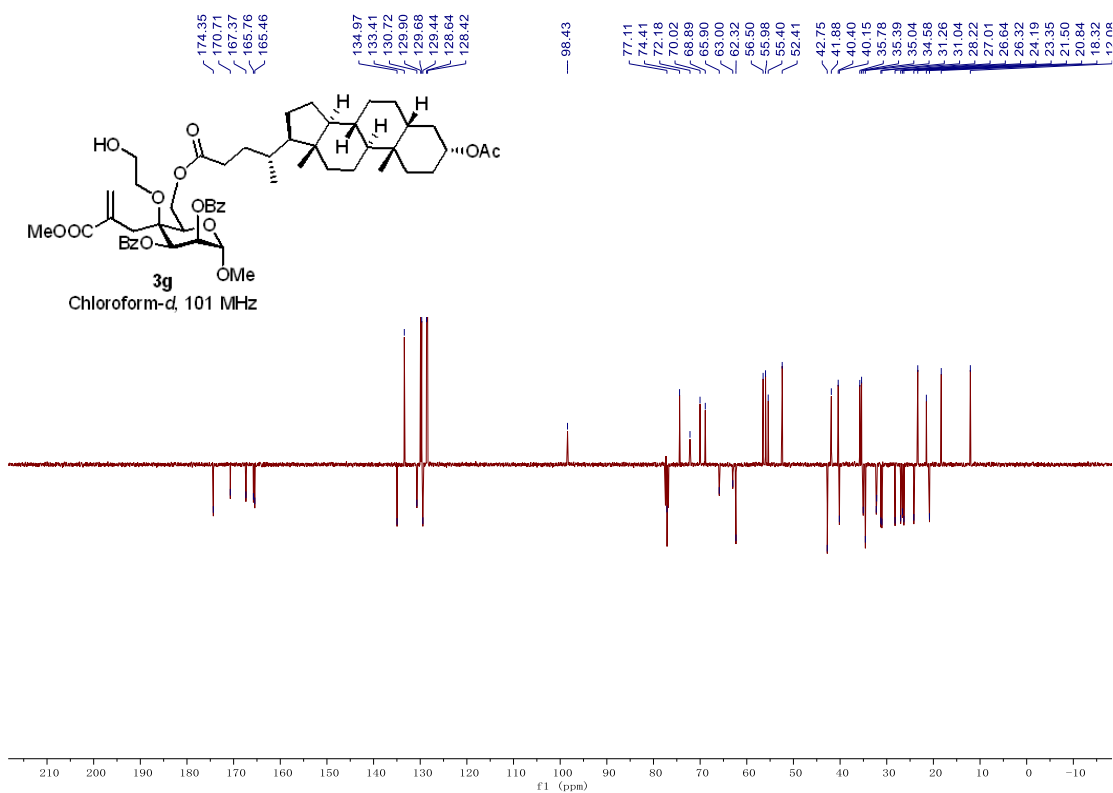

**<sup>13</sup>C NMR Spectra of compound 3g**

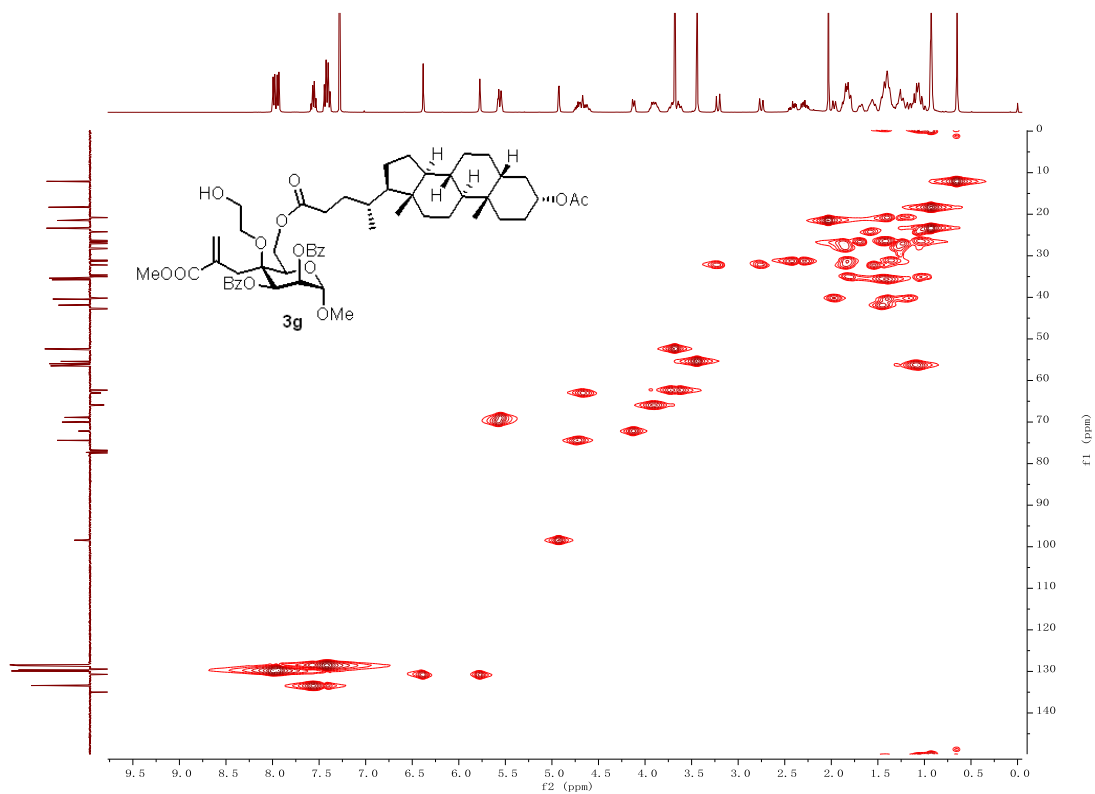

**HSQC Spectra of compound 3g**

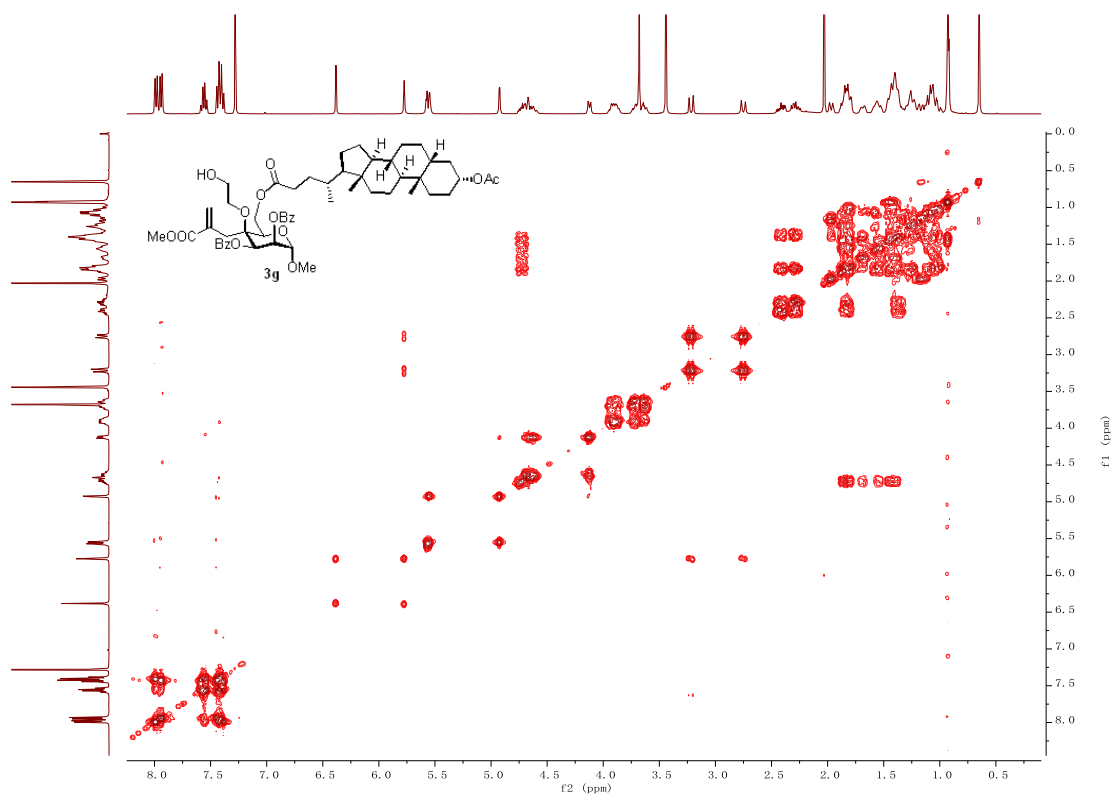

**COSY Spectra of compound 3g**

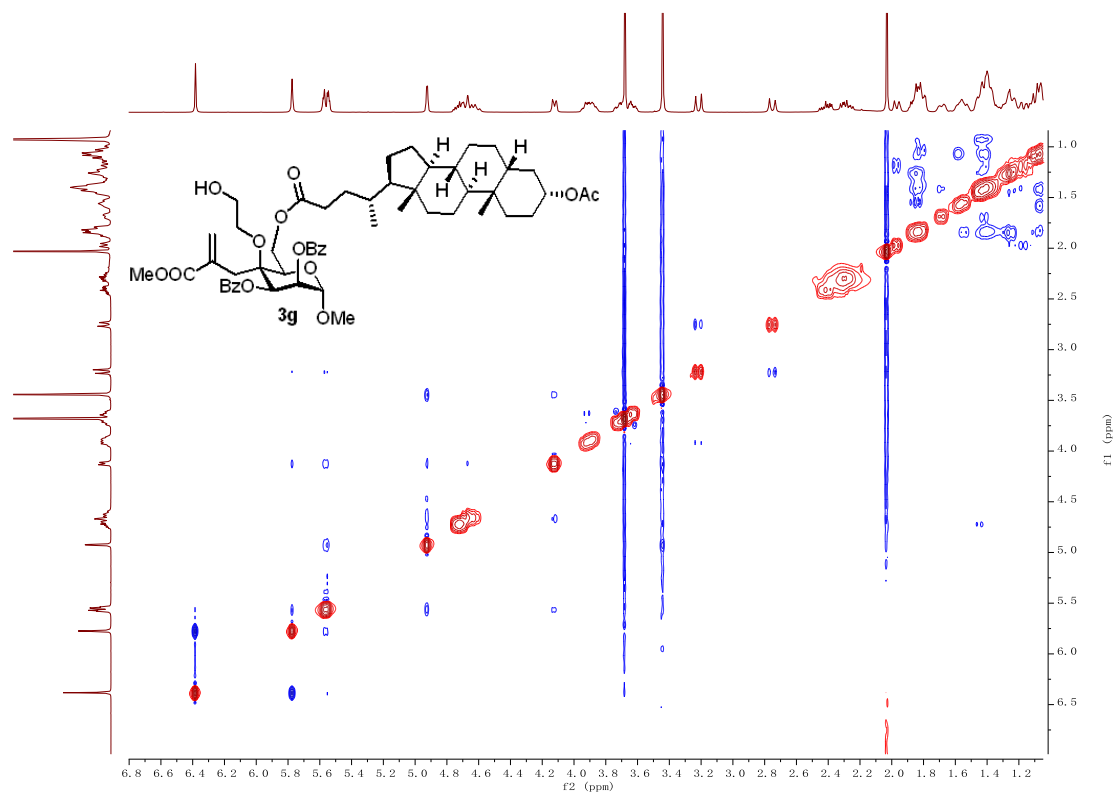

NOESY Spectra of compound 3g

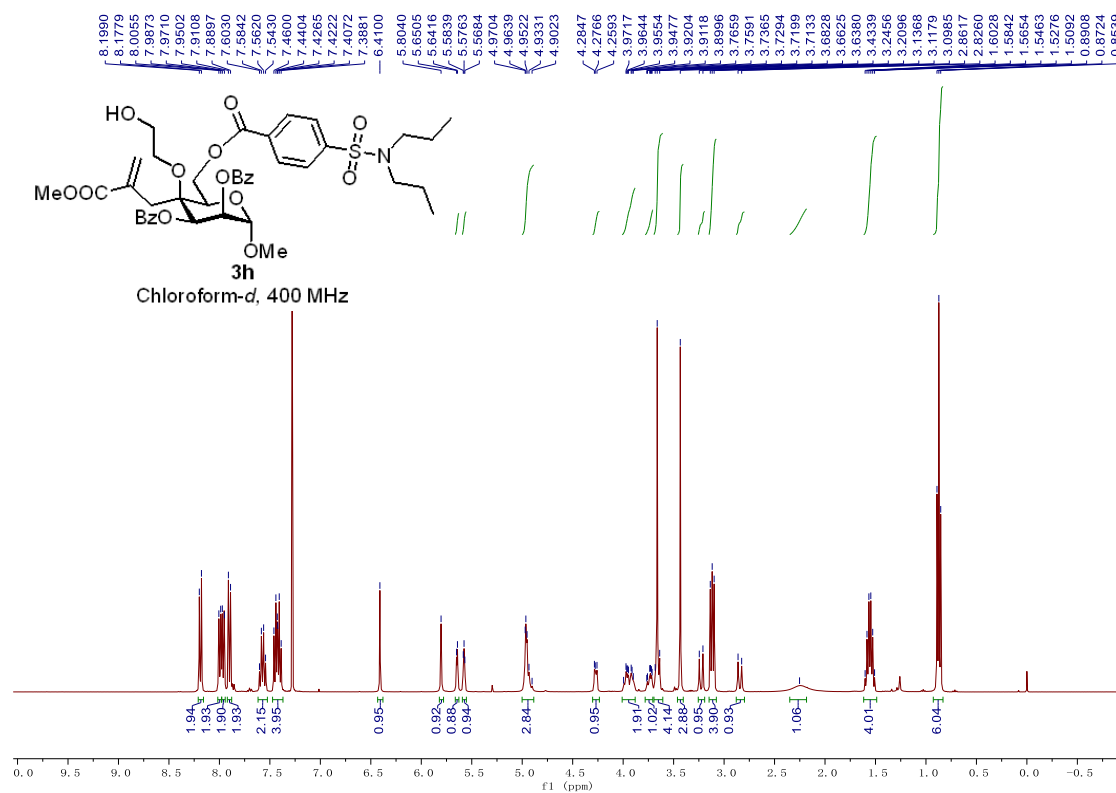

<sup>1</sup>H NMR Spectra of compound 3h

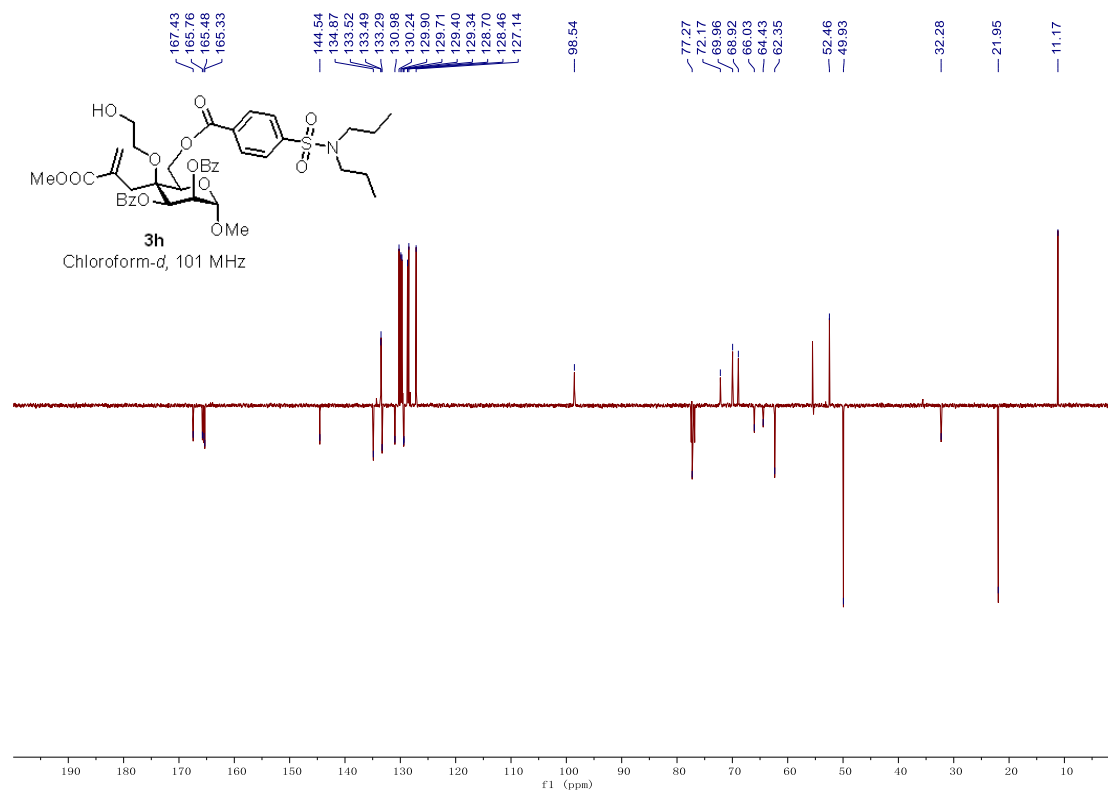

### $^{13}\text{C}$ NMR Spectra of compound **3h**

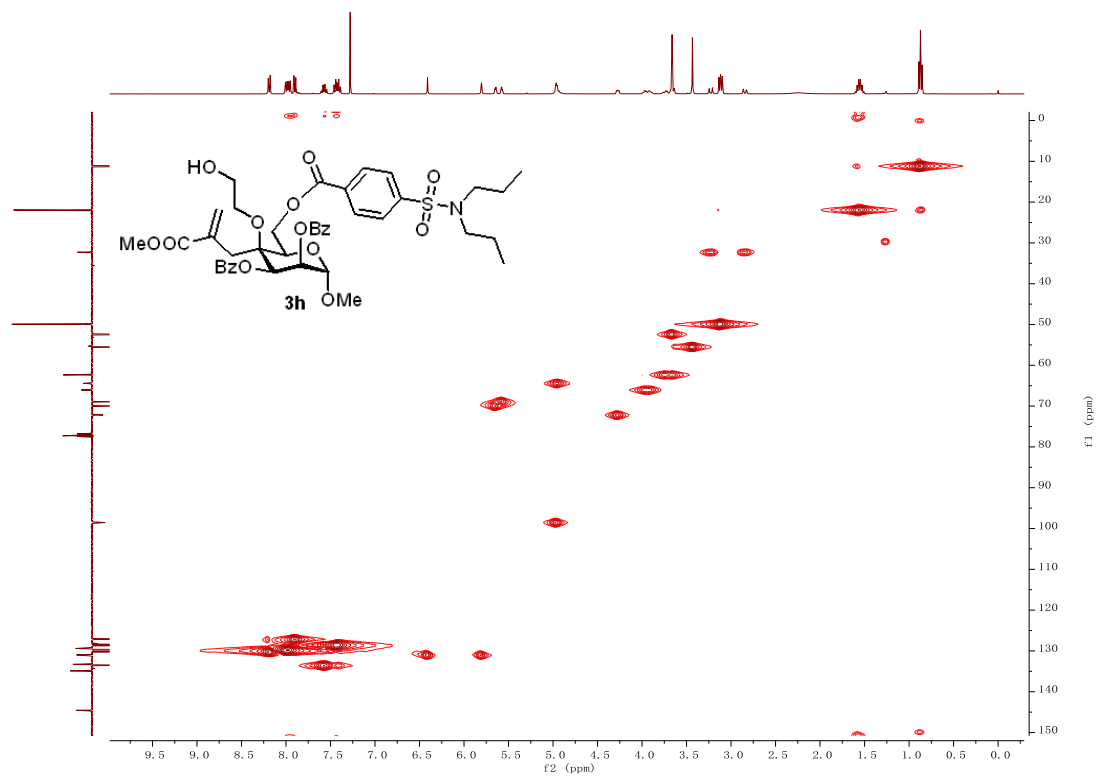

### HSQC Spectra of compound **3h**

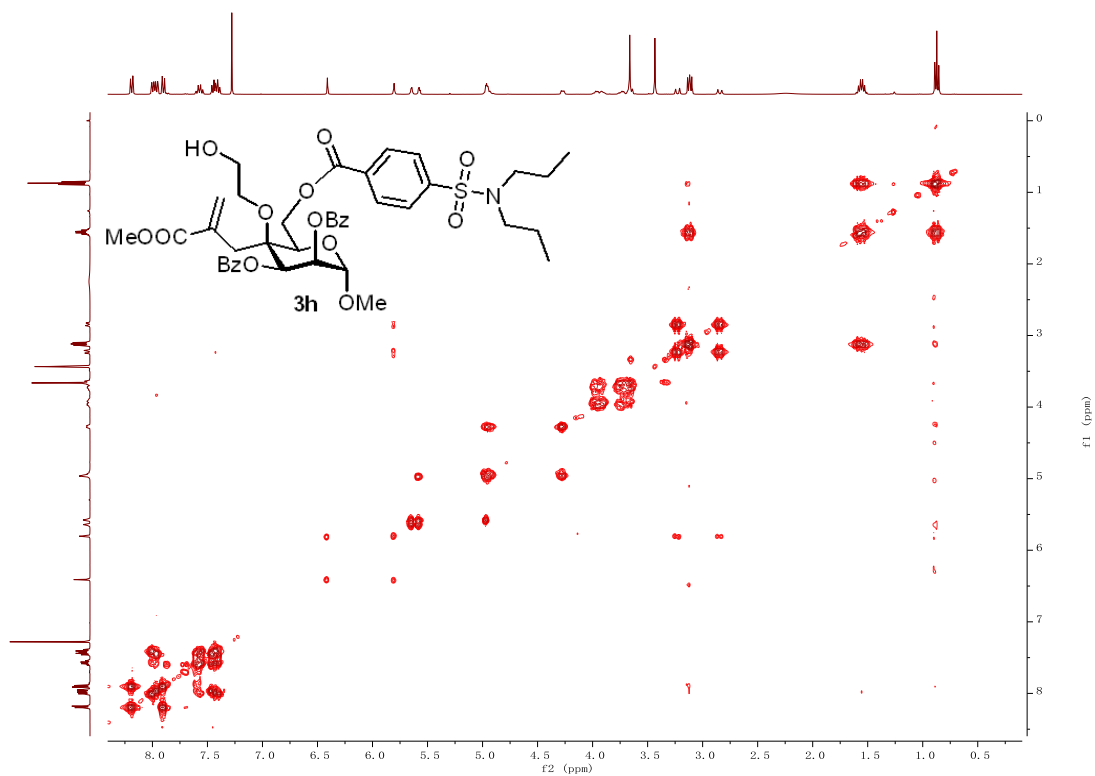

**COSY Spectra of compound 3h**

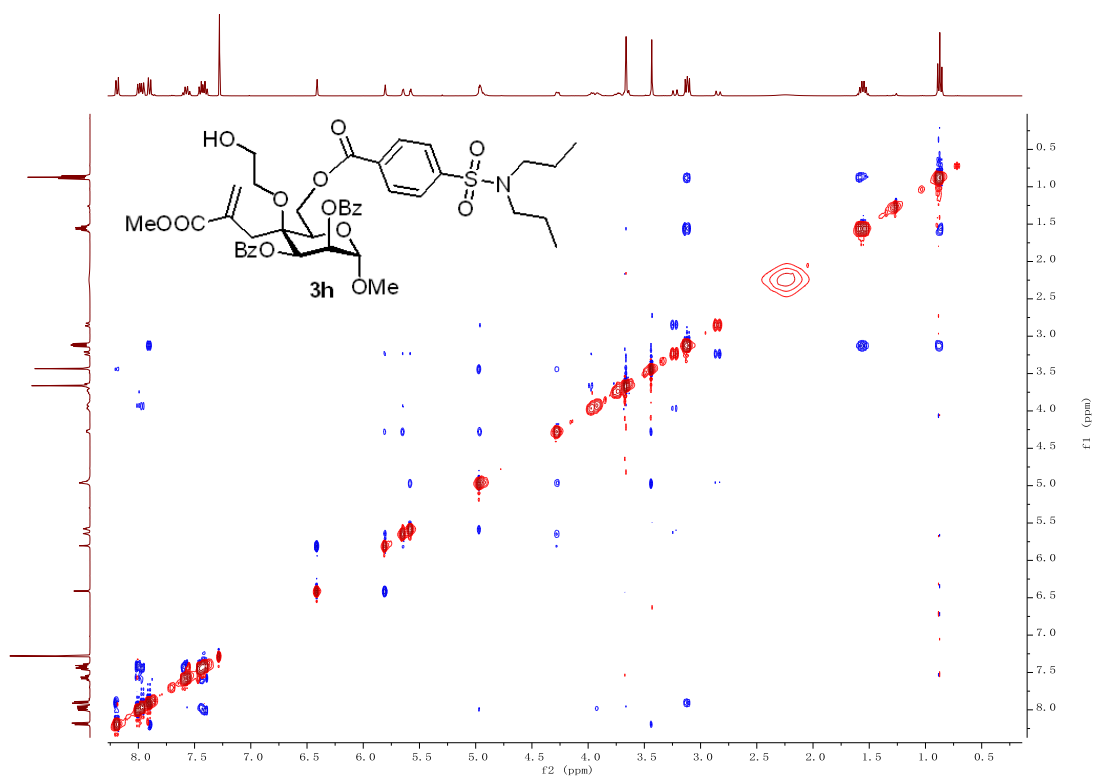

**NOESY Spectra of compound 3h**

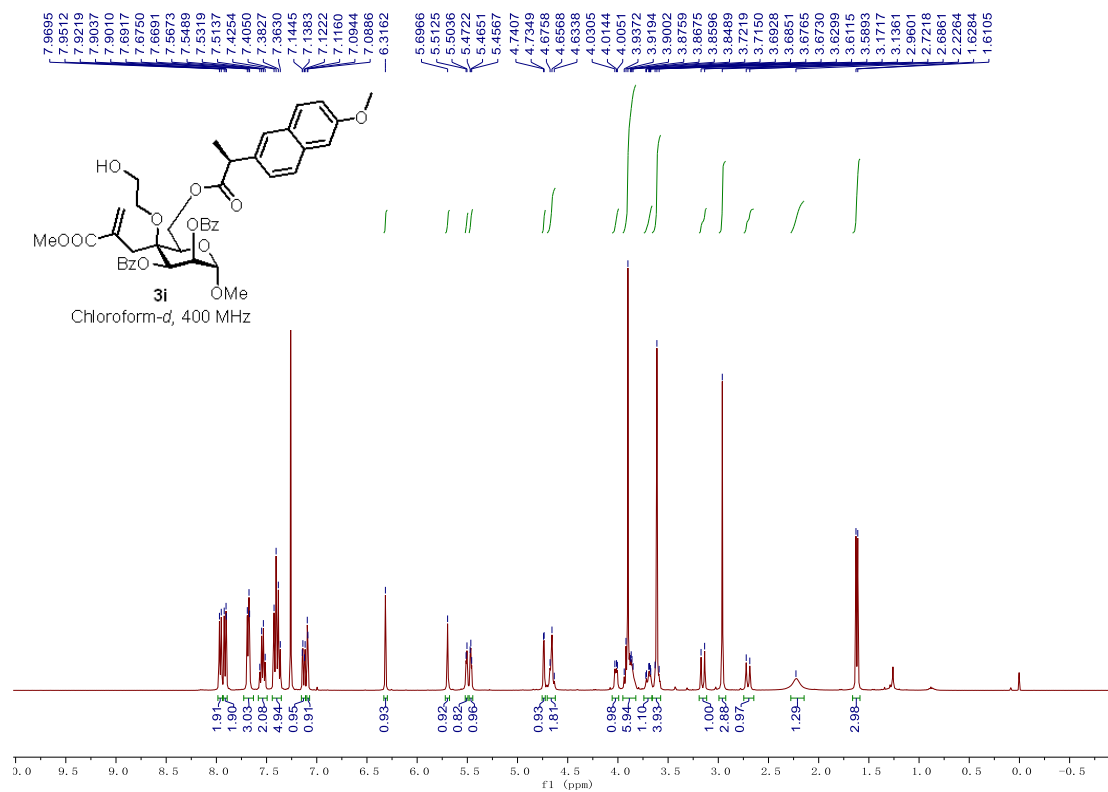

**<sup>1</sup>H NMR Spectra of compound 3i**

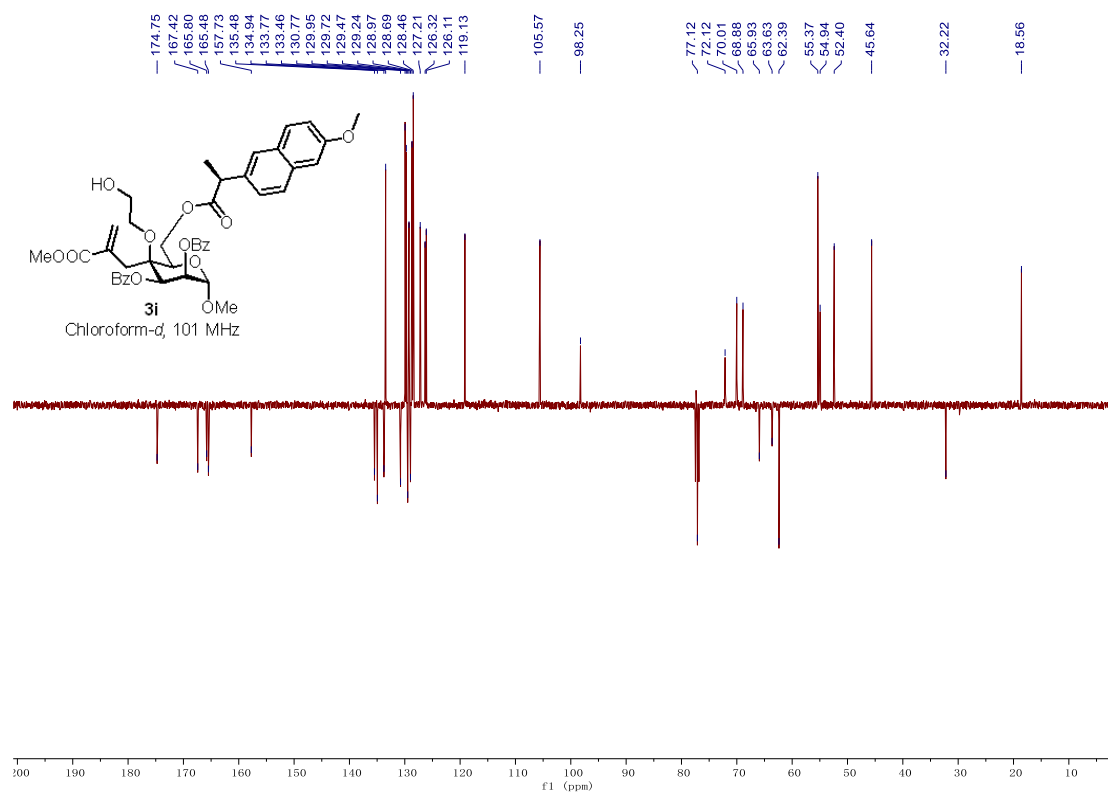

**<sup>13</sup>C NMR Spectra of compound 3i**

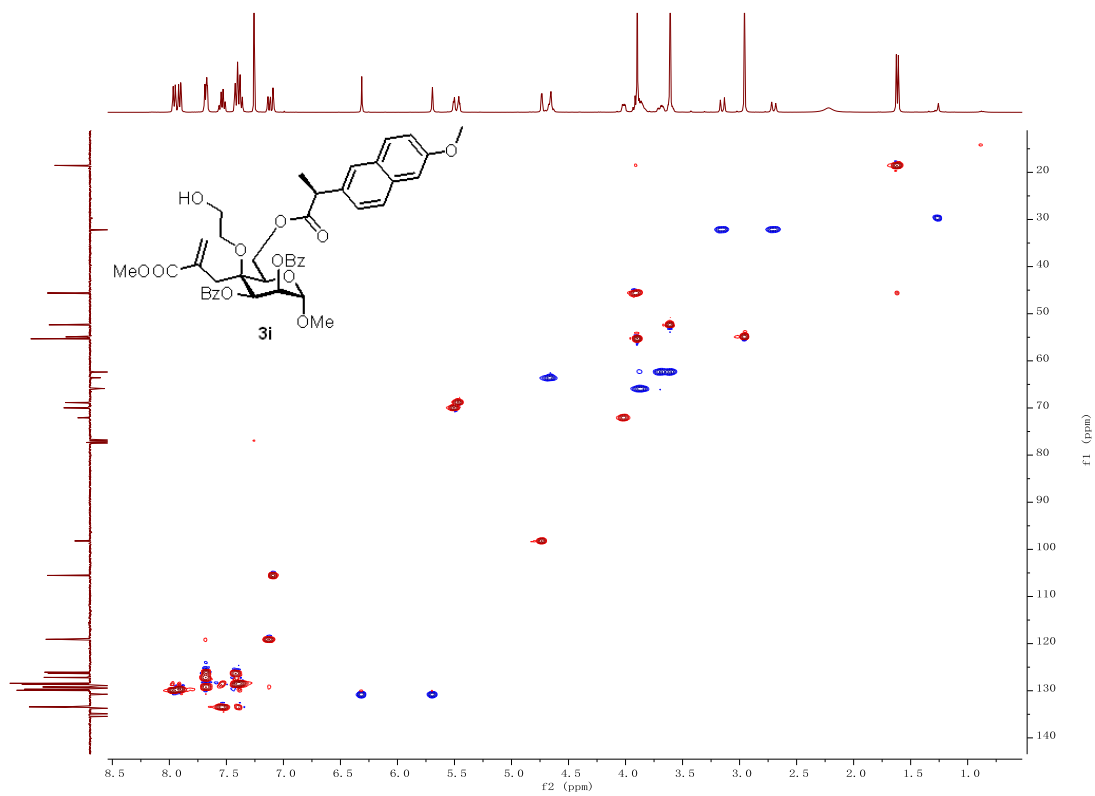

**HSQC Spectra of compound 3i**

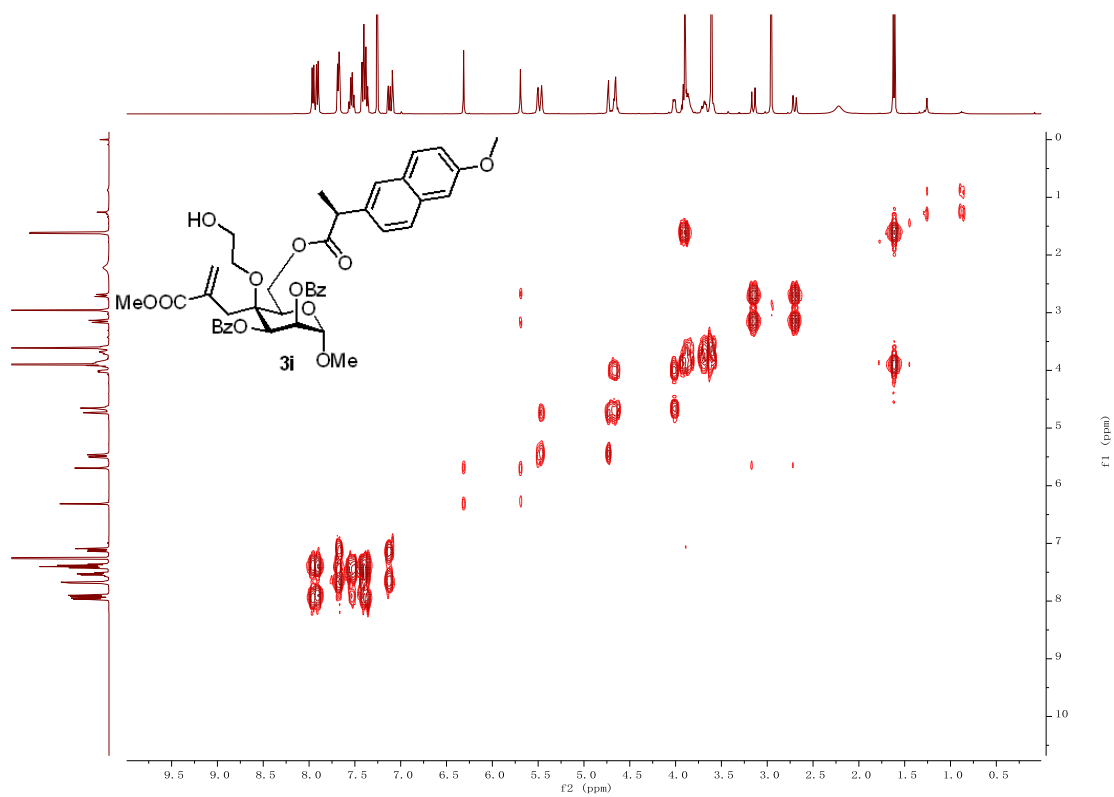

**COSY Spectra of compound 3i**



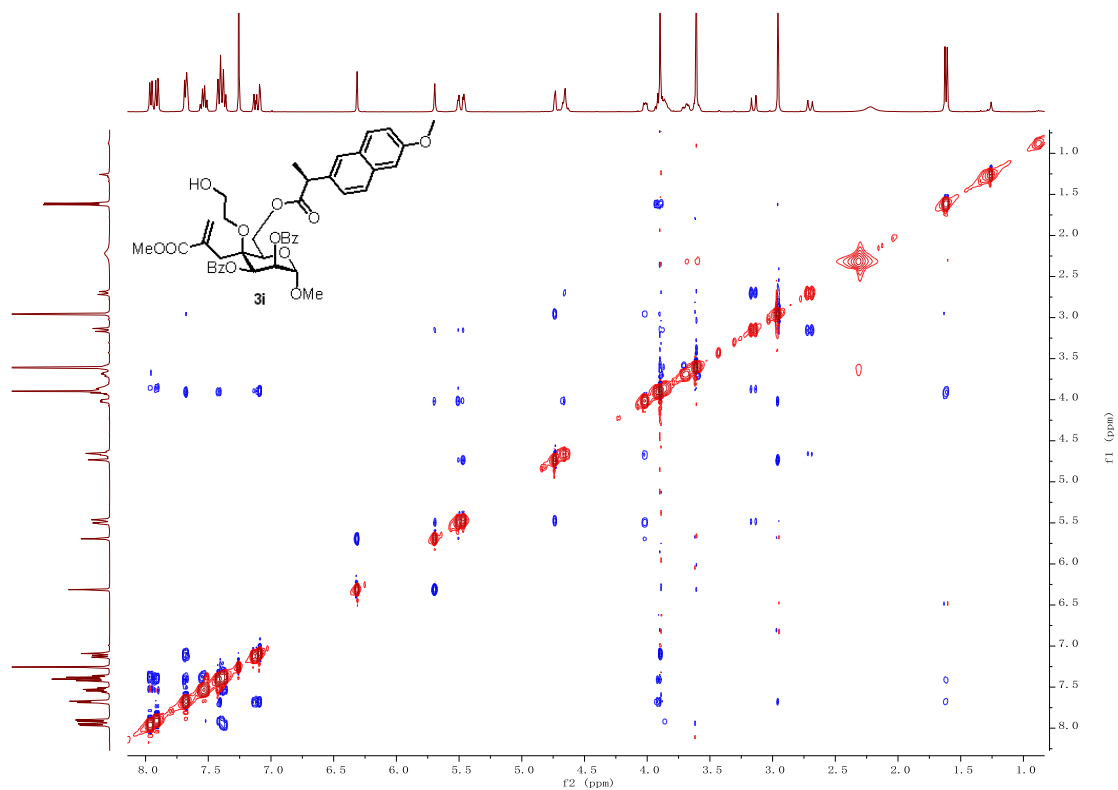

**NOESY Spectra of compound 3i**

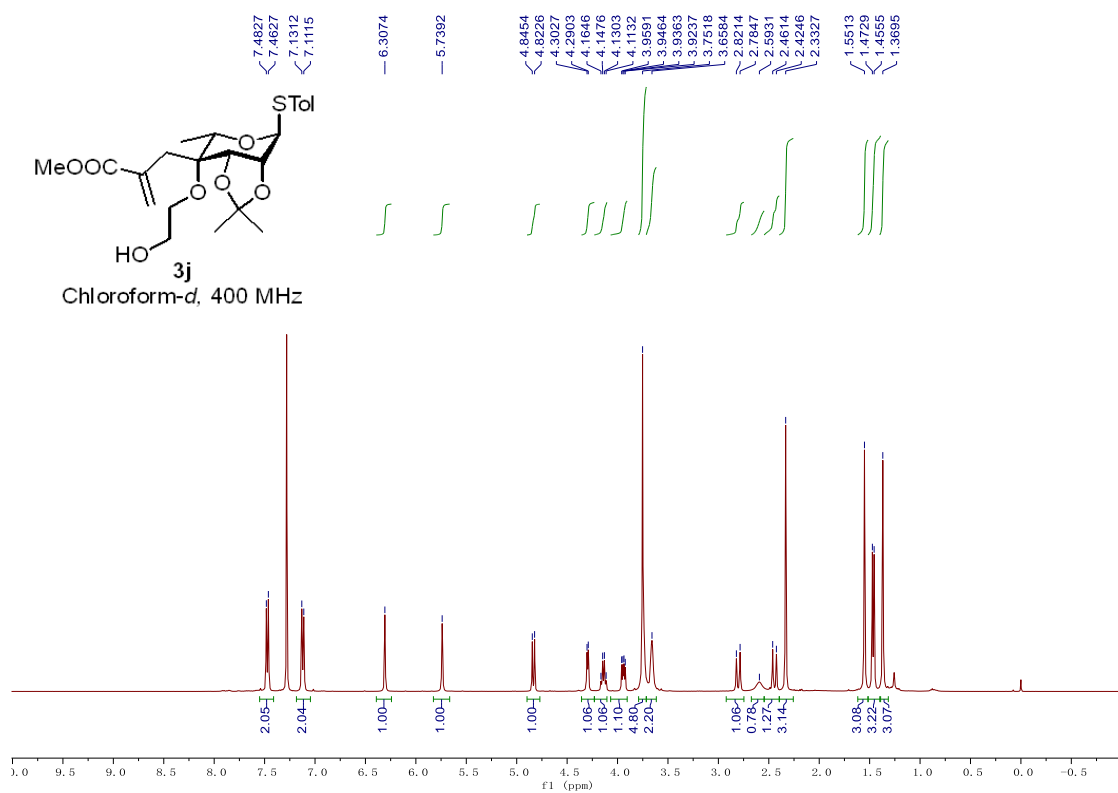

**<sup>1</sup>H NMR Spectra of compound 3j**

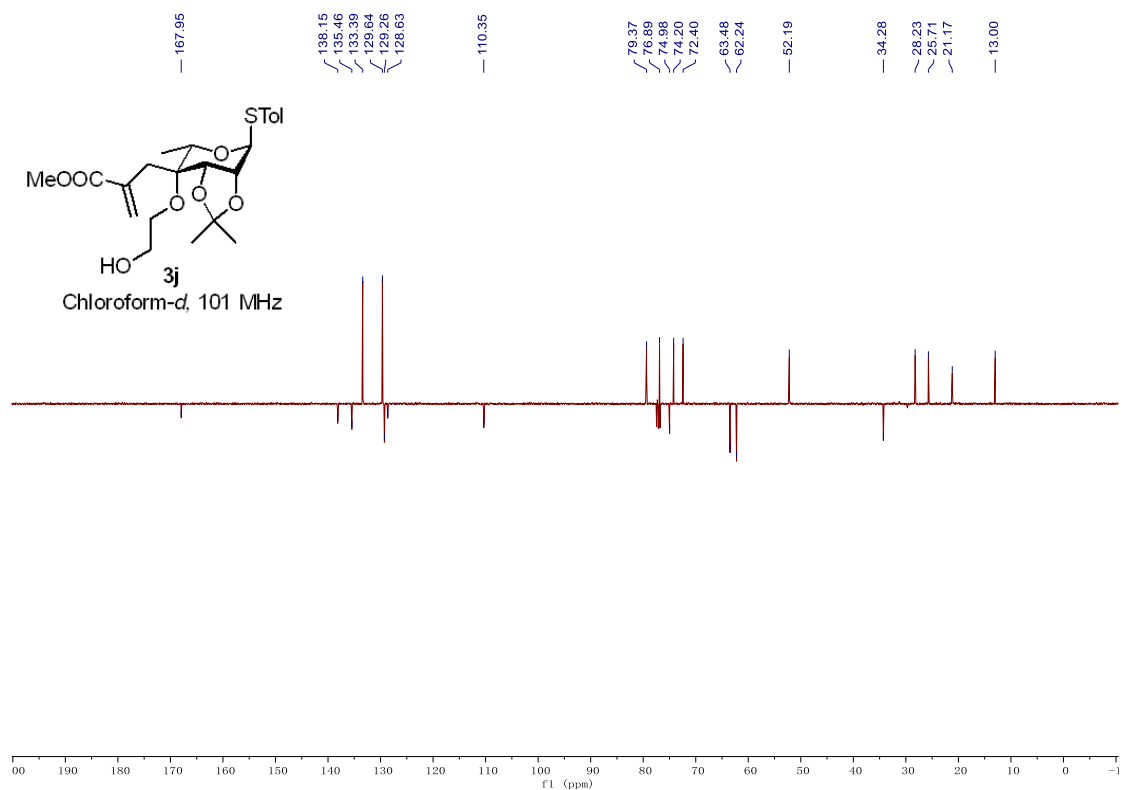

**<sup>13</sup>C NMR Spectra of compound **3j****

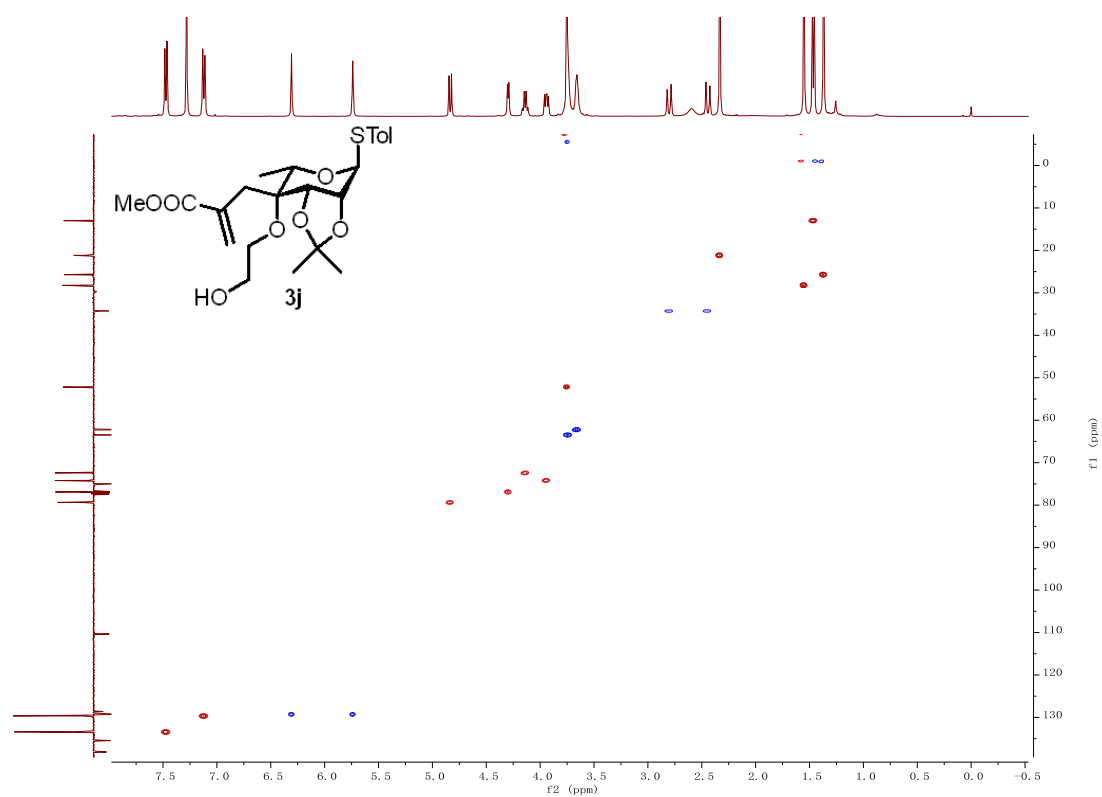

**HSQC Spectra of compound **3j****

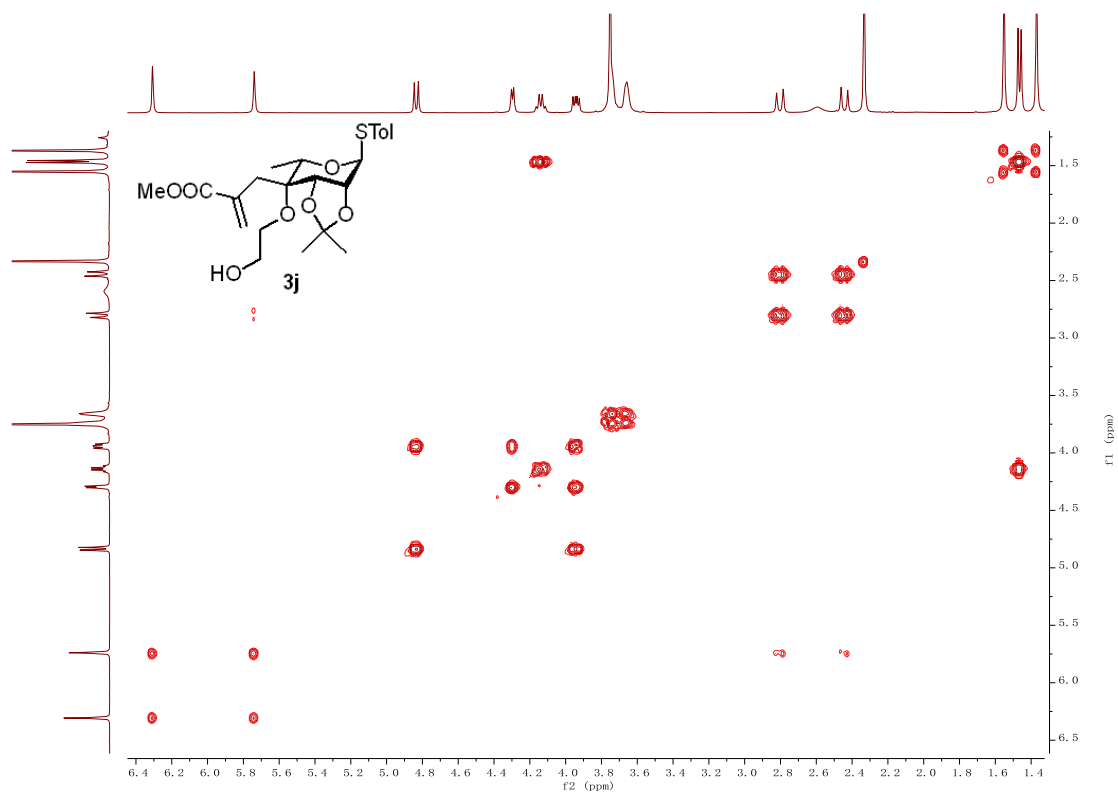

**COSY Spectra of compound 3j**

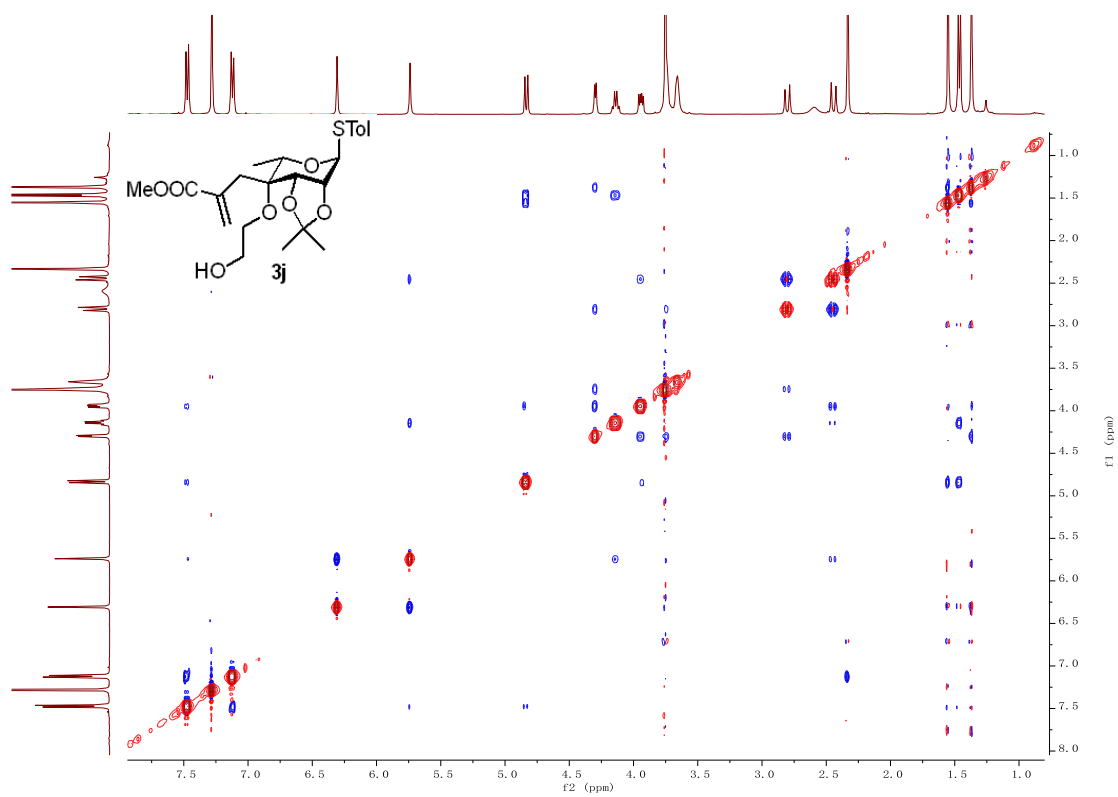

**NOESY Spectra of compound 3j**

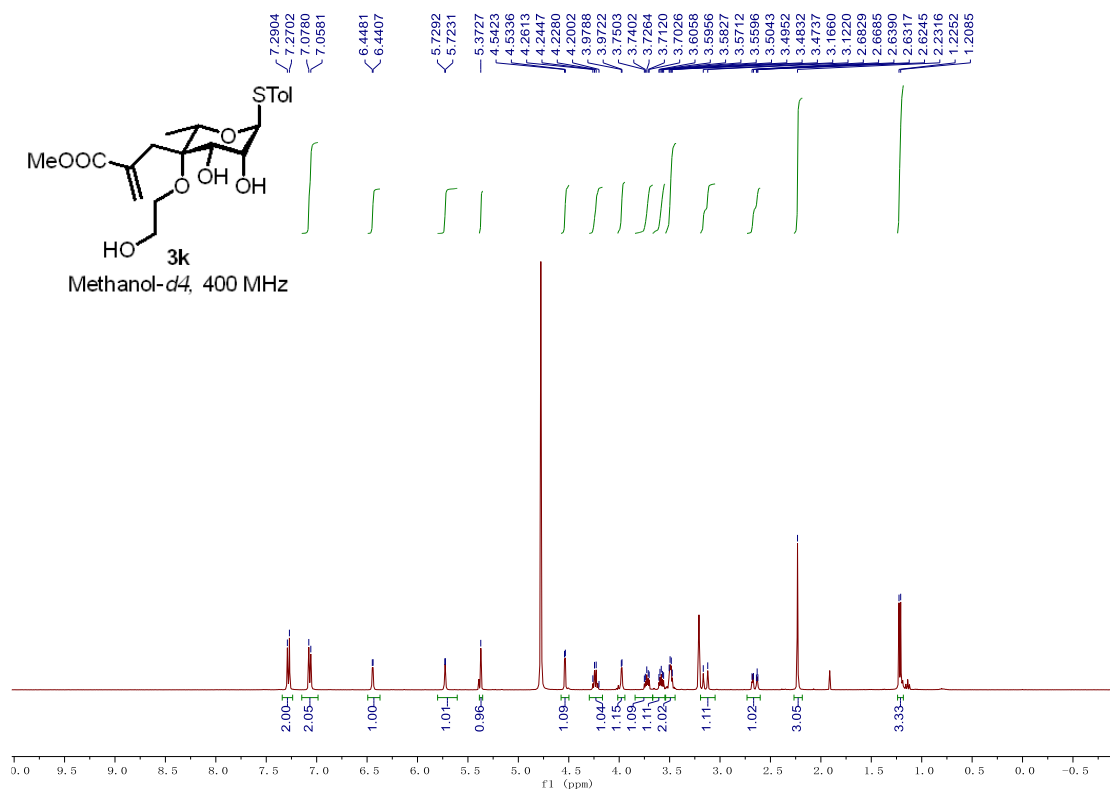

**<sup>1</sup>H NMR Spectra of compound 3k**

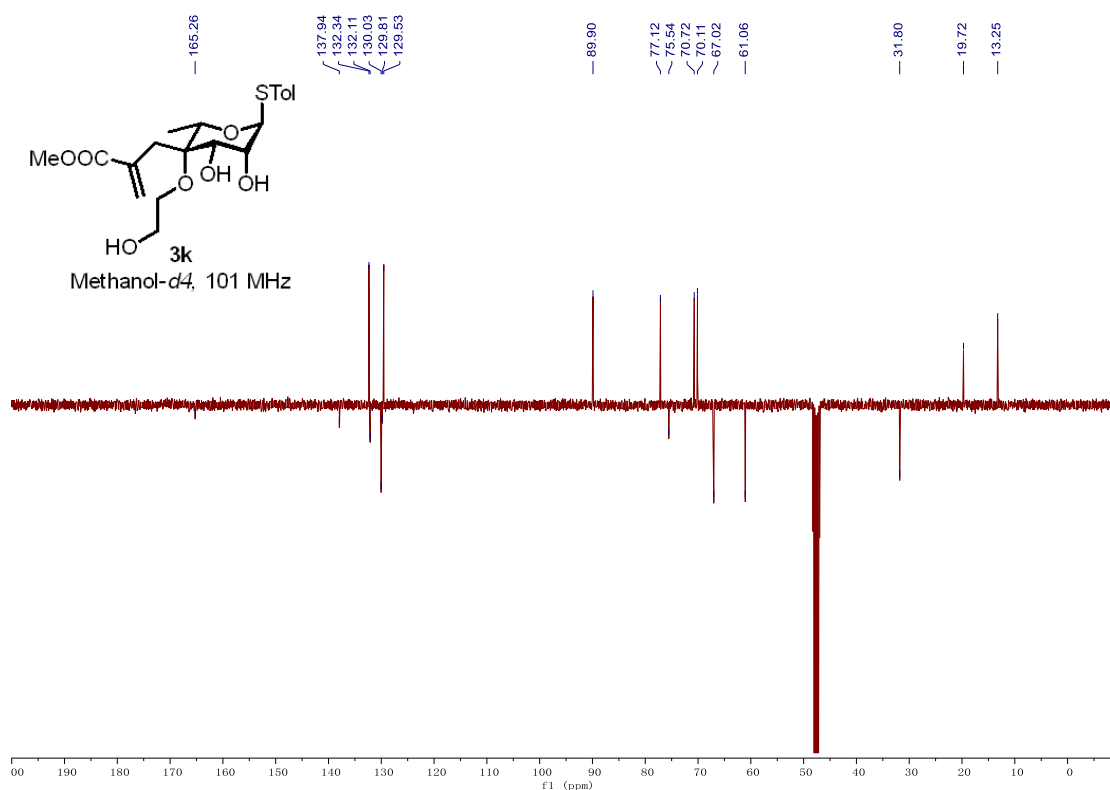

**<sup>13</sup>C NMR Spectra of compound 3k**

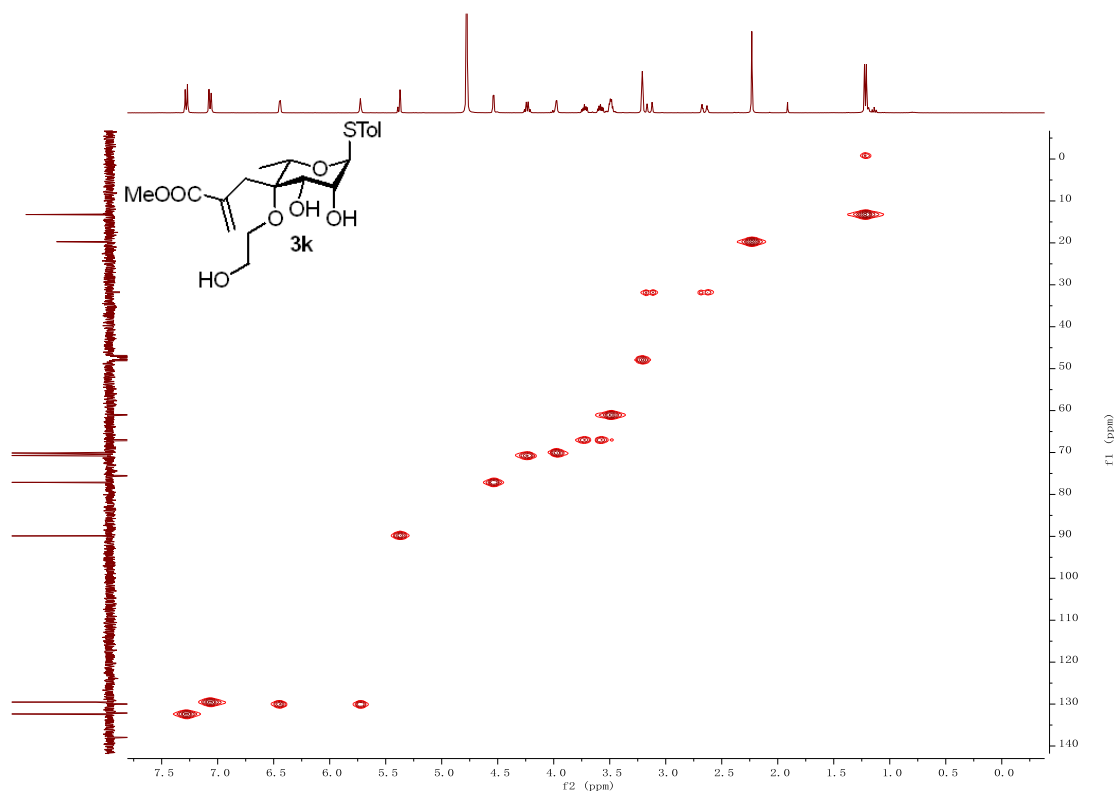

HSQC Spectra of compound 3k

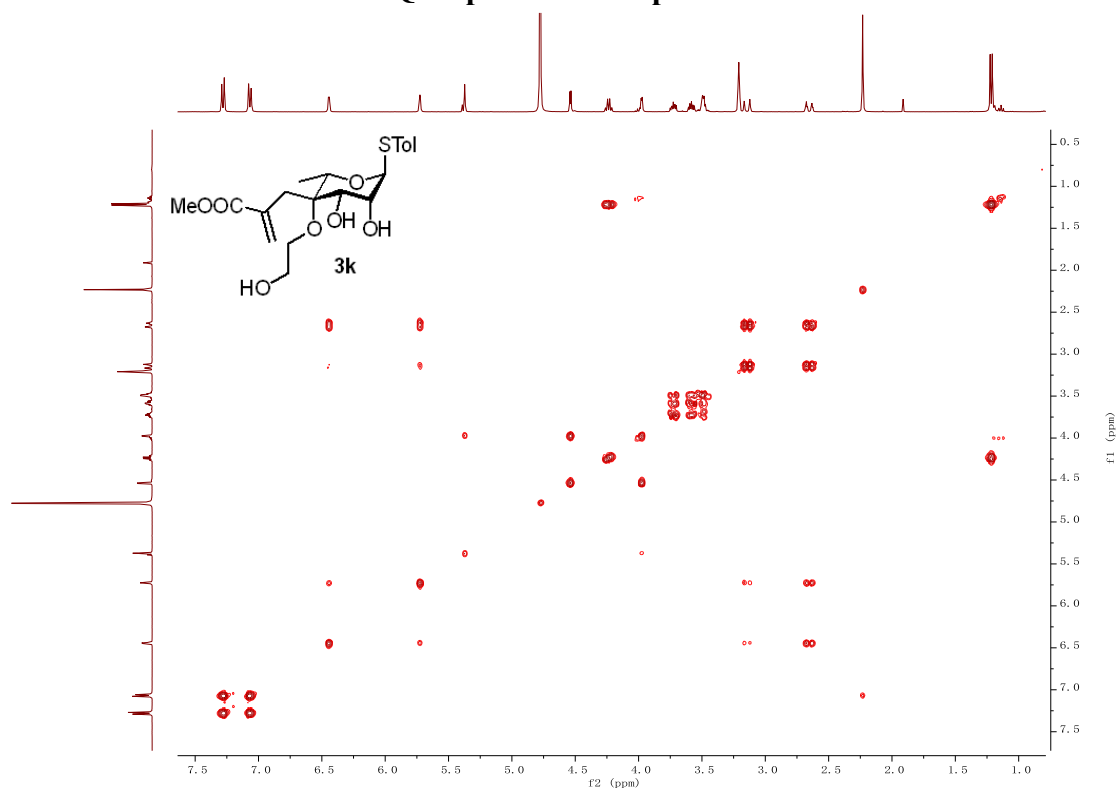

COSY Spectra of compound 3k

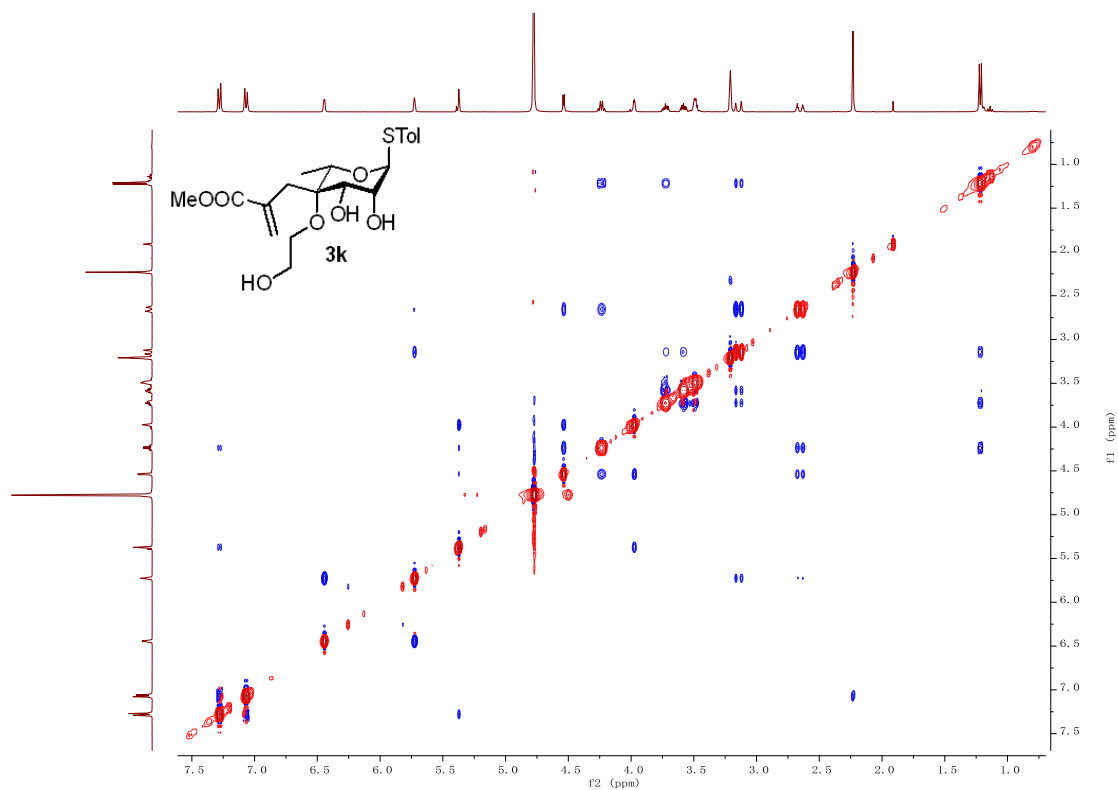

**NOESY Spectra of compound 3k**

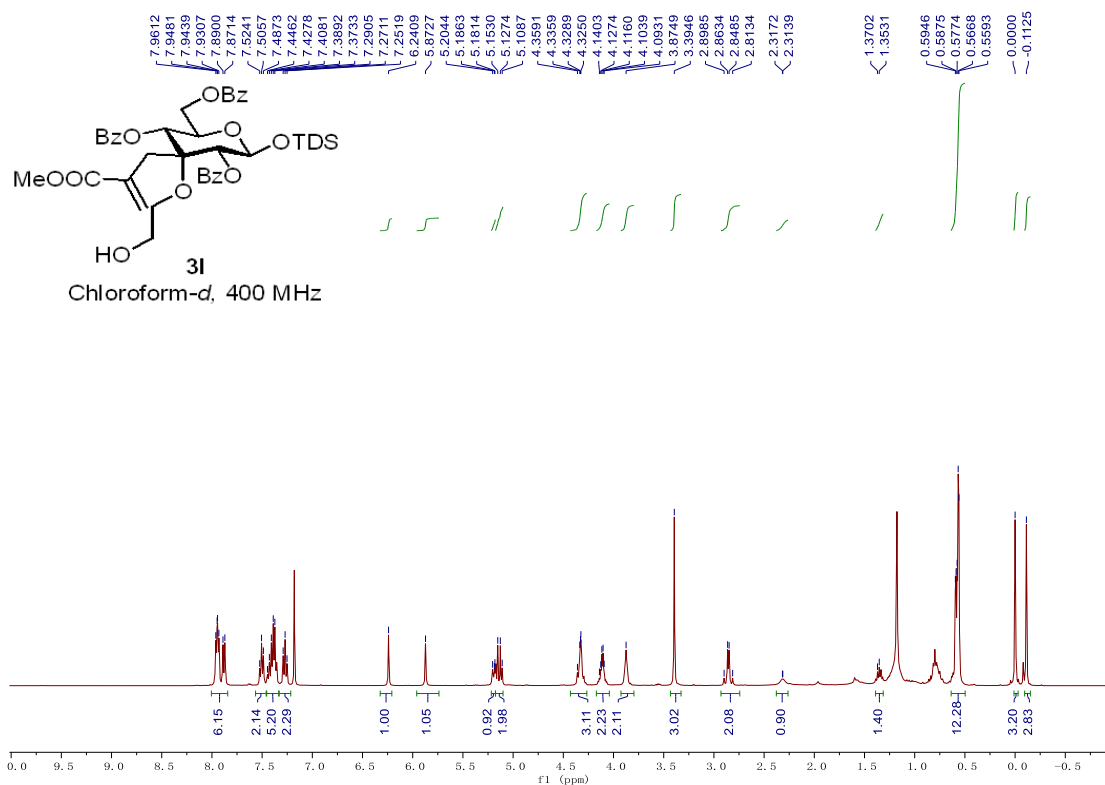

**<sup>1</sup>H NMR Spectra of compound 3l**

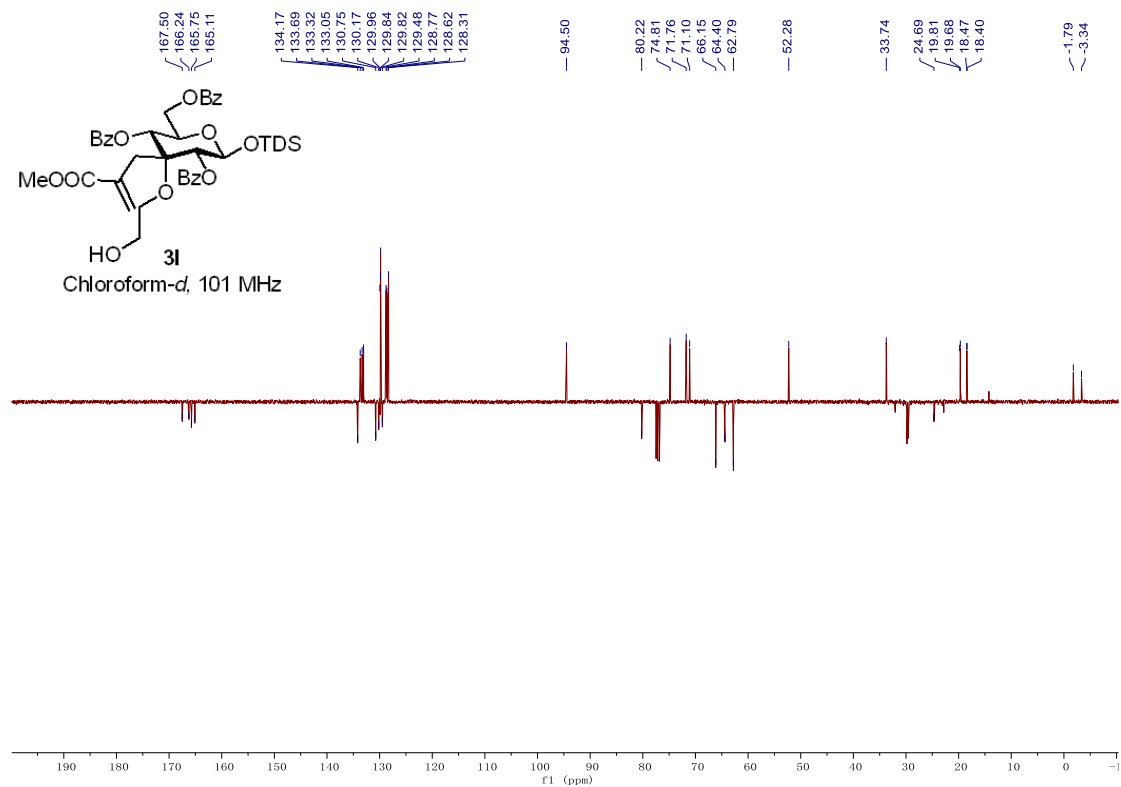

### <sup>13</sup>C NMR Spectra of compound **31**

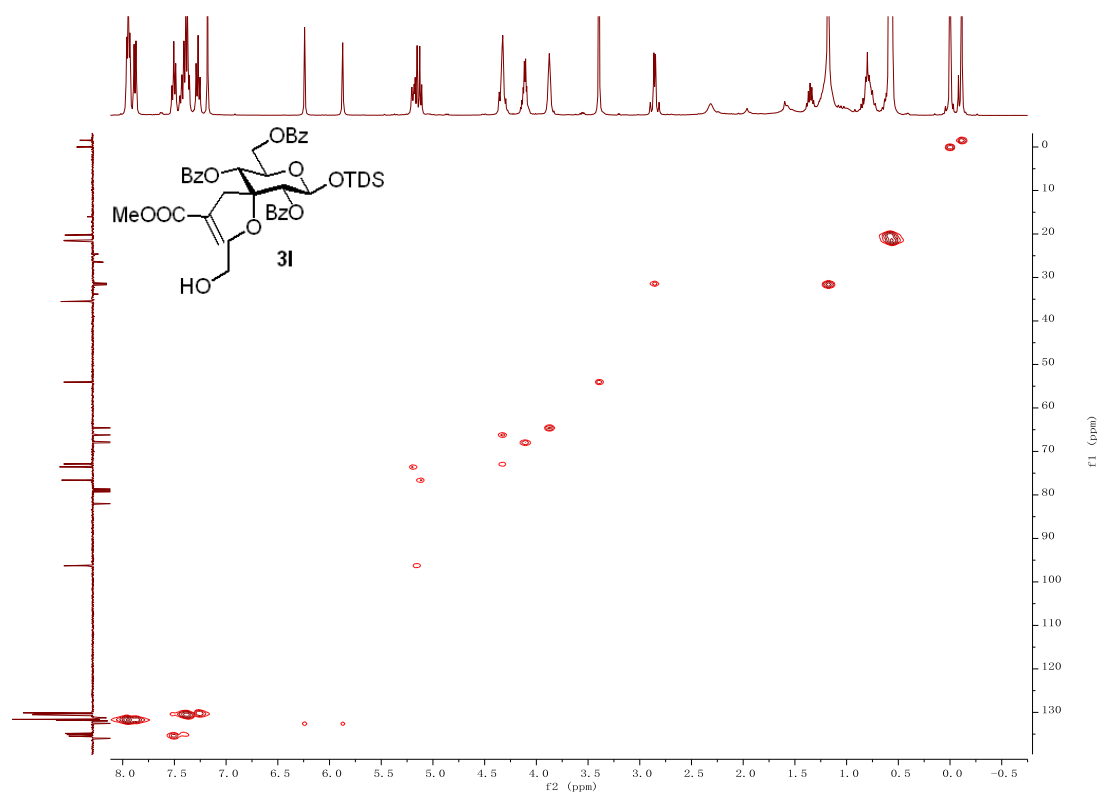

### HSQC NMR Spectra of compound **31**

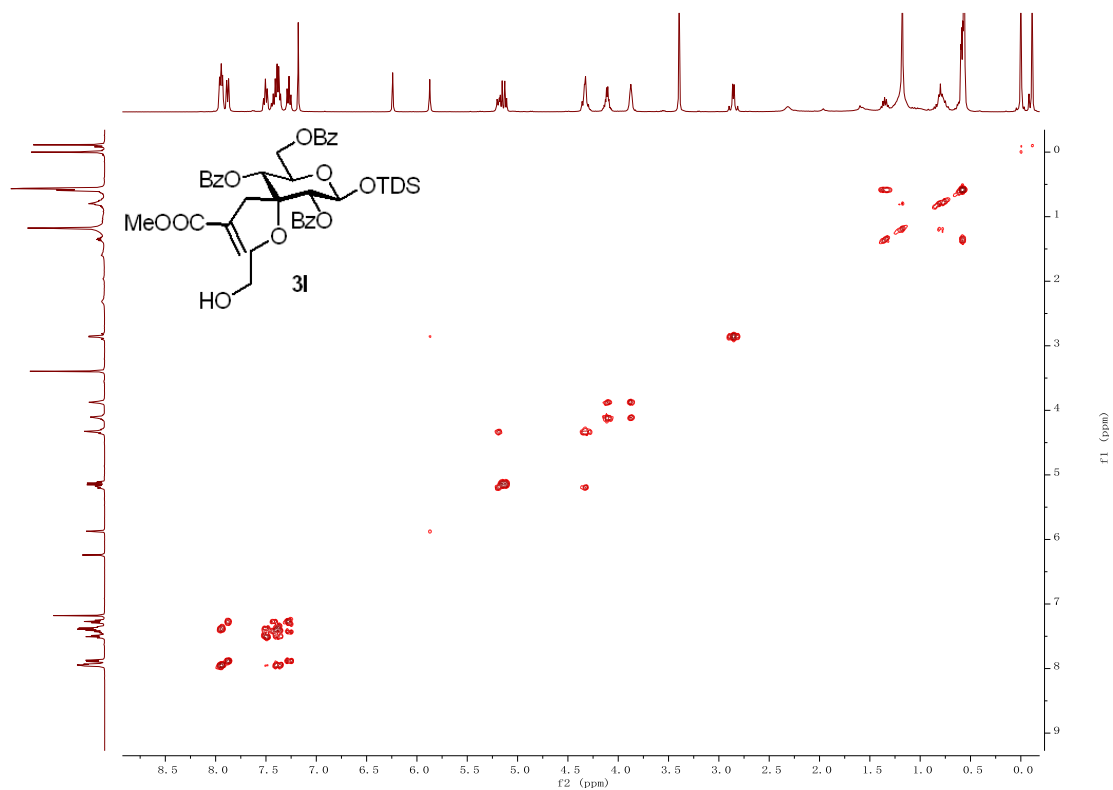

**COSY NMR Spectra of compound 3l**

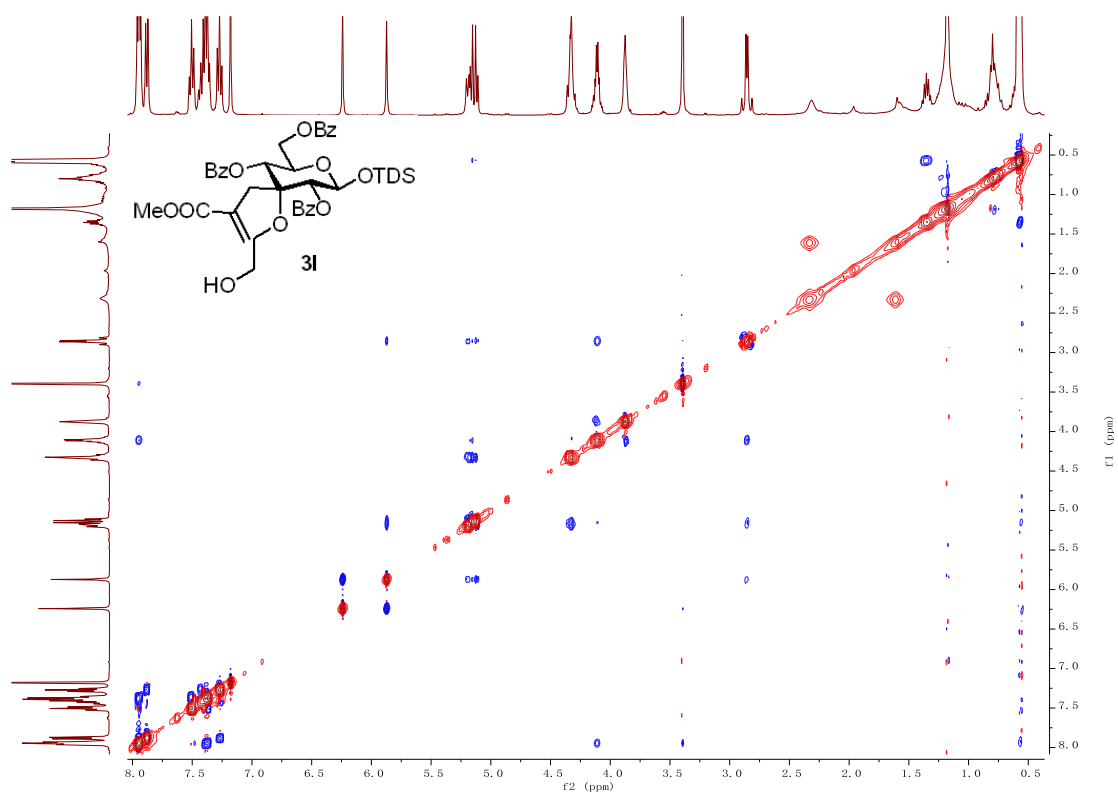

**NOESY NMR Spectra of compound 3l**



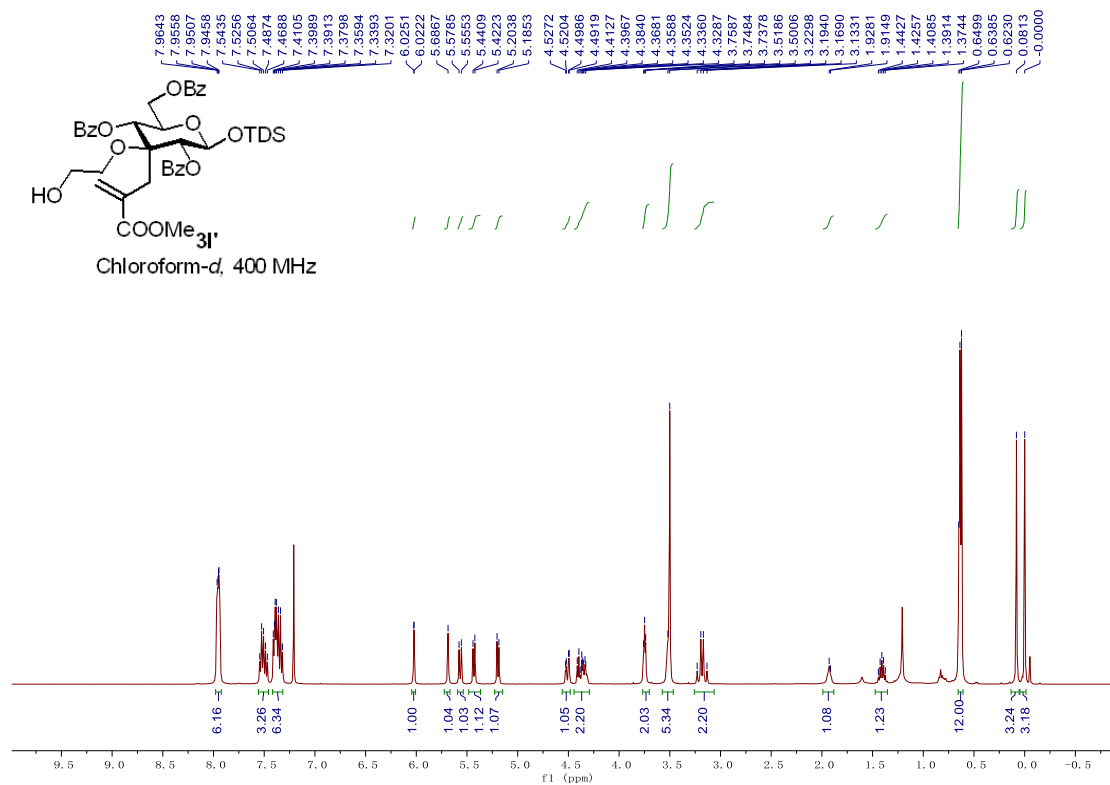

**<sup>1</sup>H NMR Spectra of compound 31'**

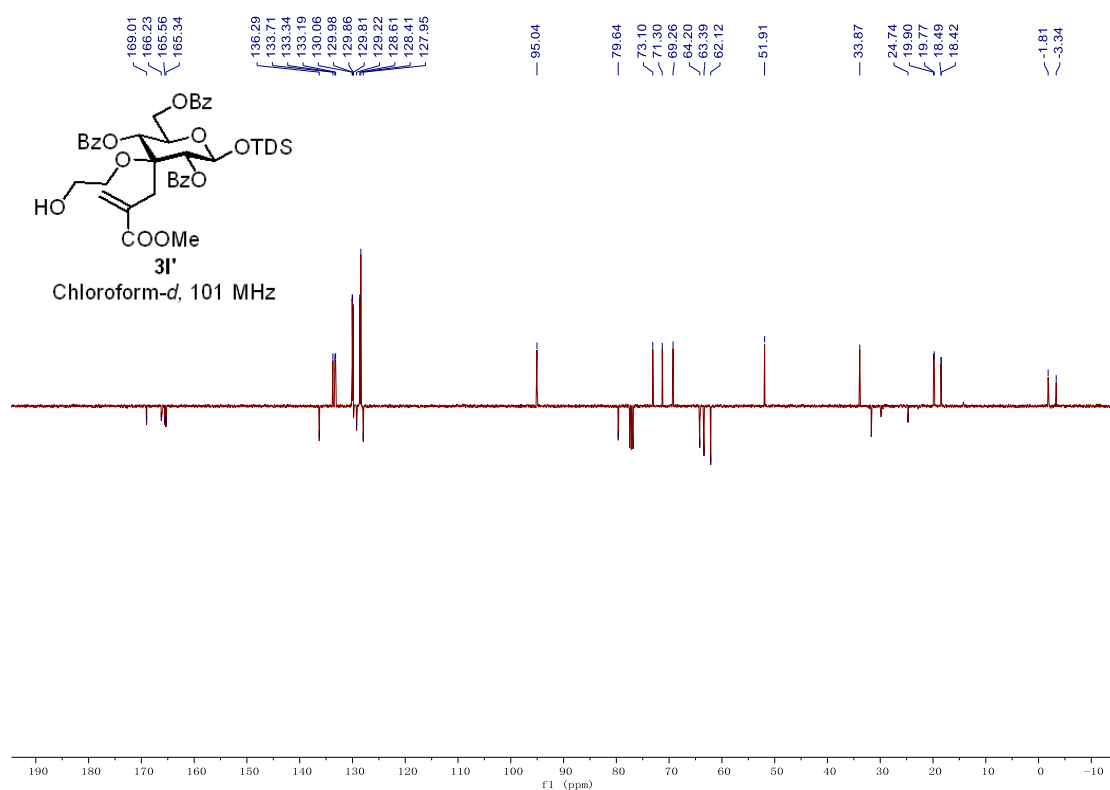

**<sup>13</sup>C NMR Spectra of compound 31'**

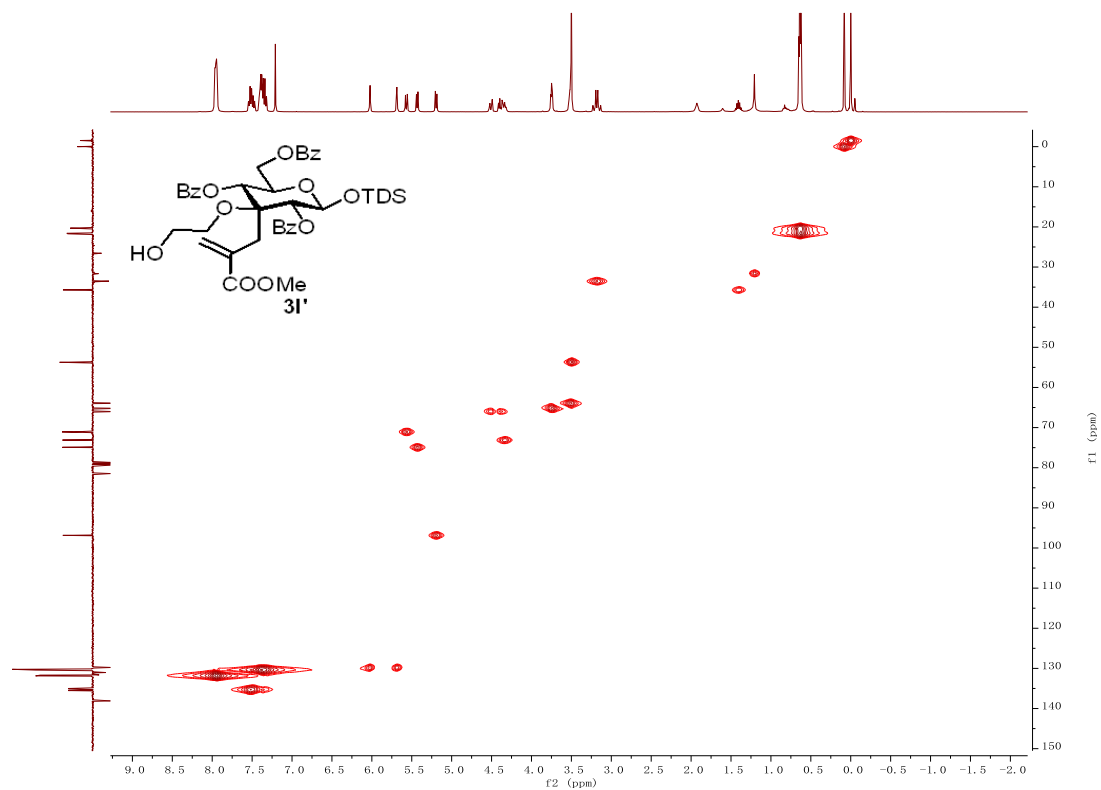

**HSQC NMR Spectra of compound 31'**

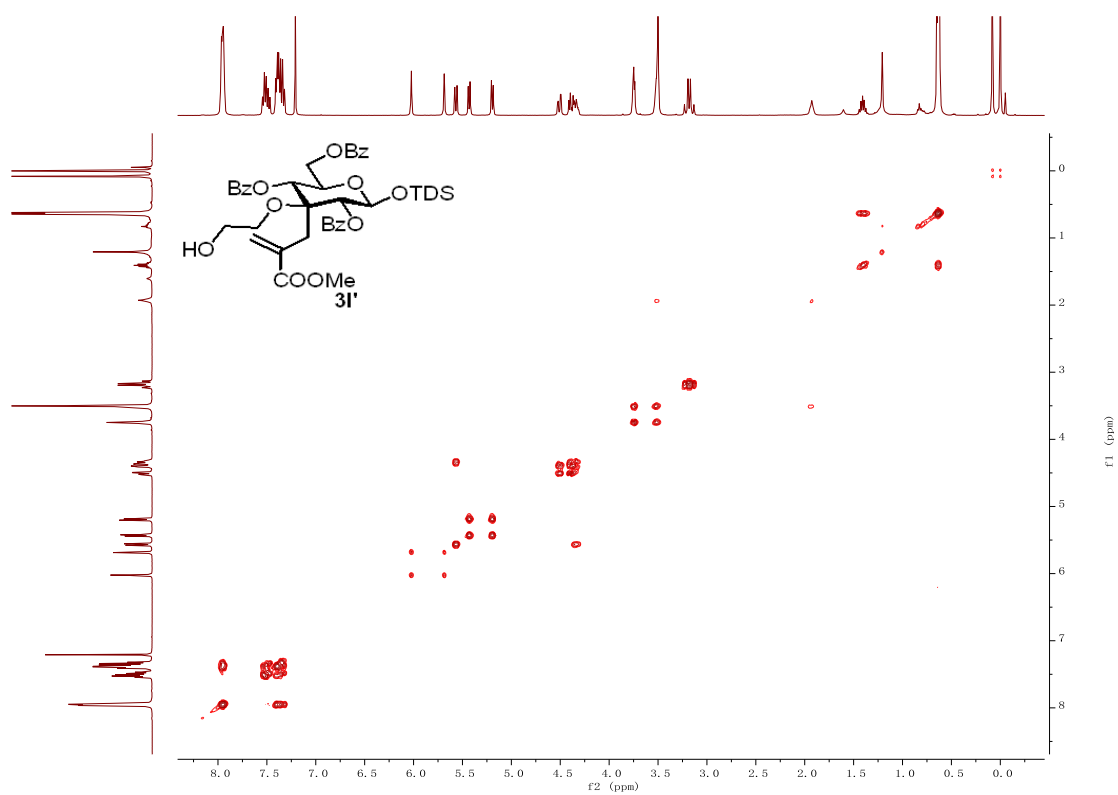

**COSY NMR Spectra of compound 31'**

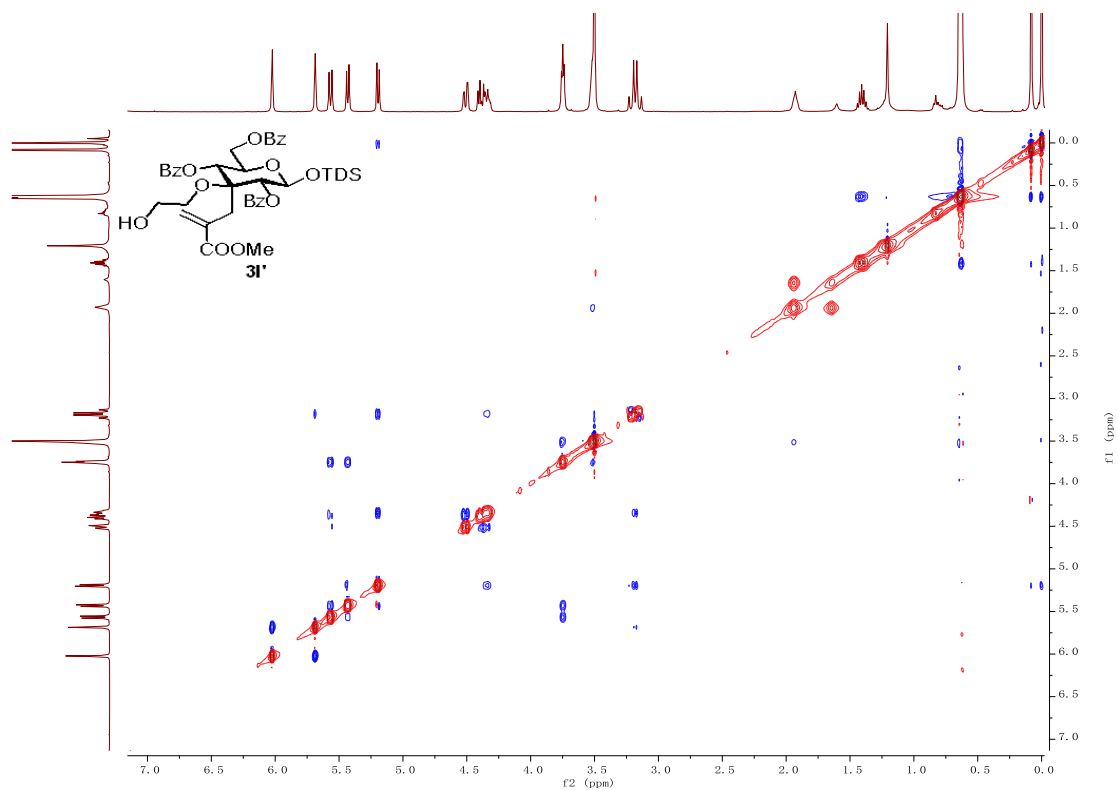

**NOESY NMR Spectra of compound 31'**

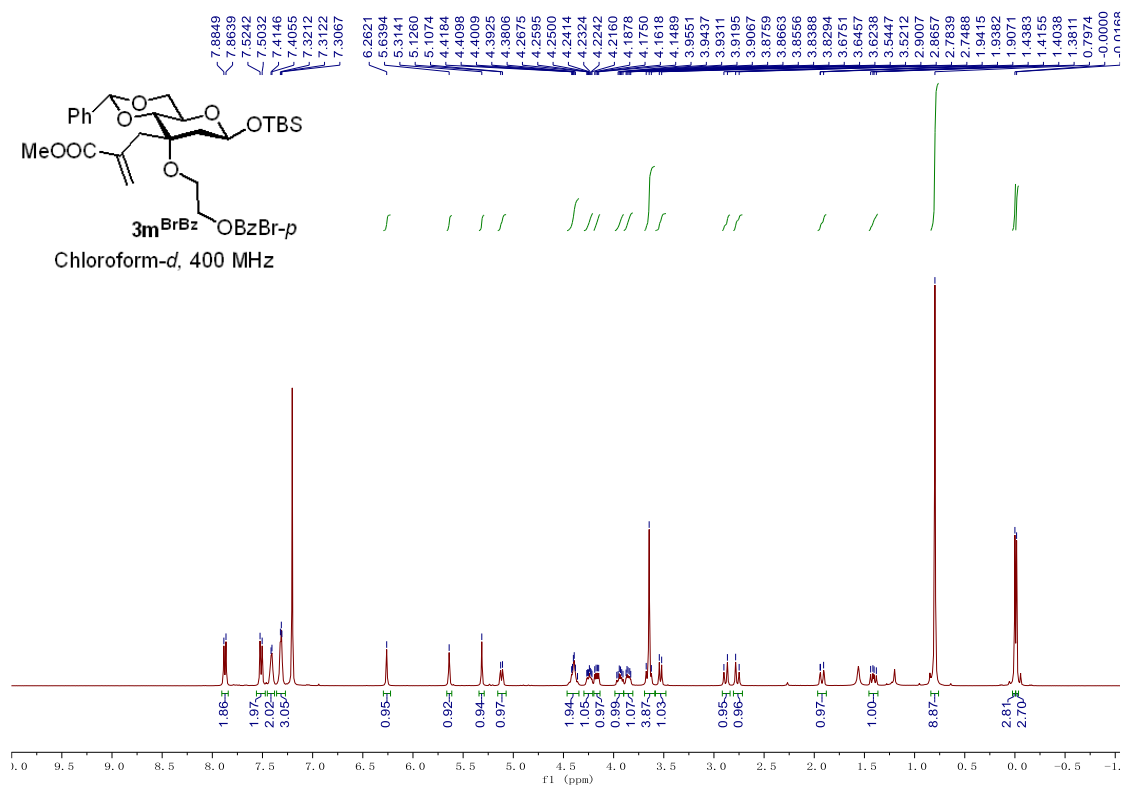

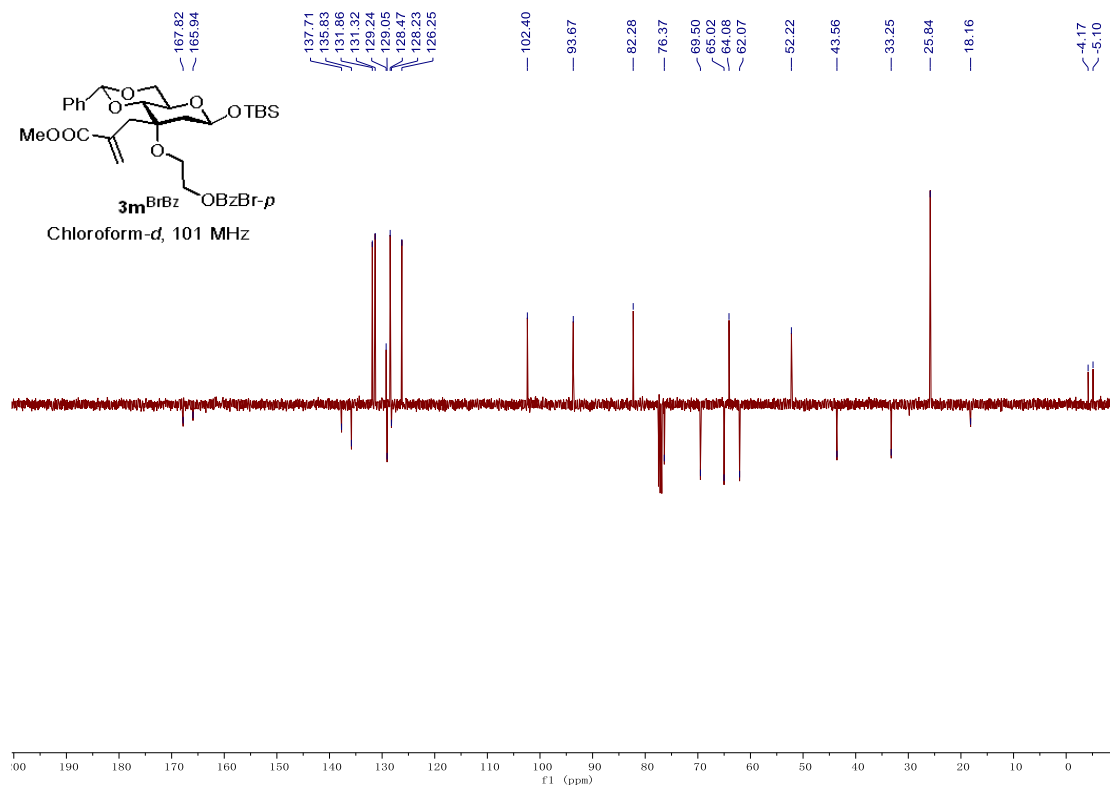

### **<sup>13</sup>C NMR Spectra of compound 3m<sup>BrBz</sup>**

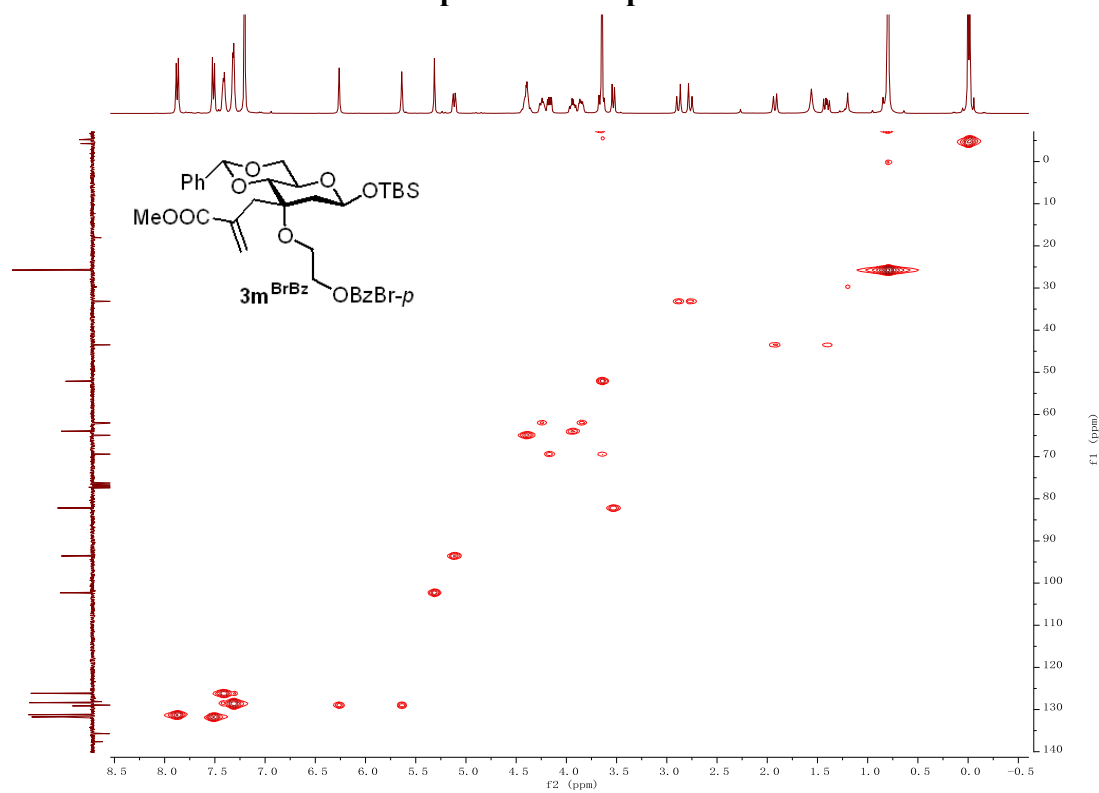

### **HSQC Spectra of compound 3m<sup>BrBz</sup>**

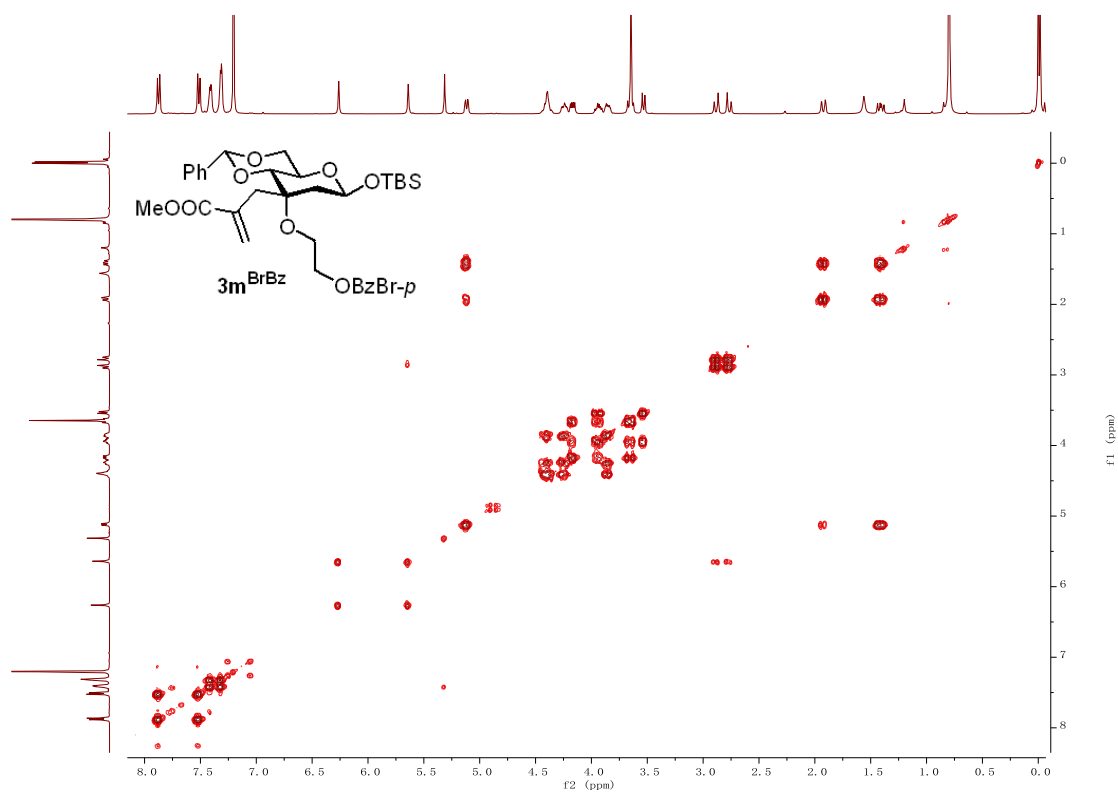

**COSY Spectra of compound 3m<sup>Br</sup>Bz**

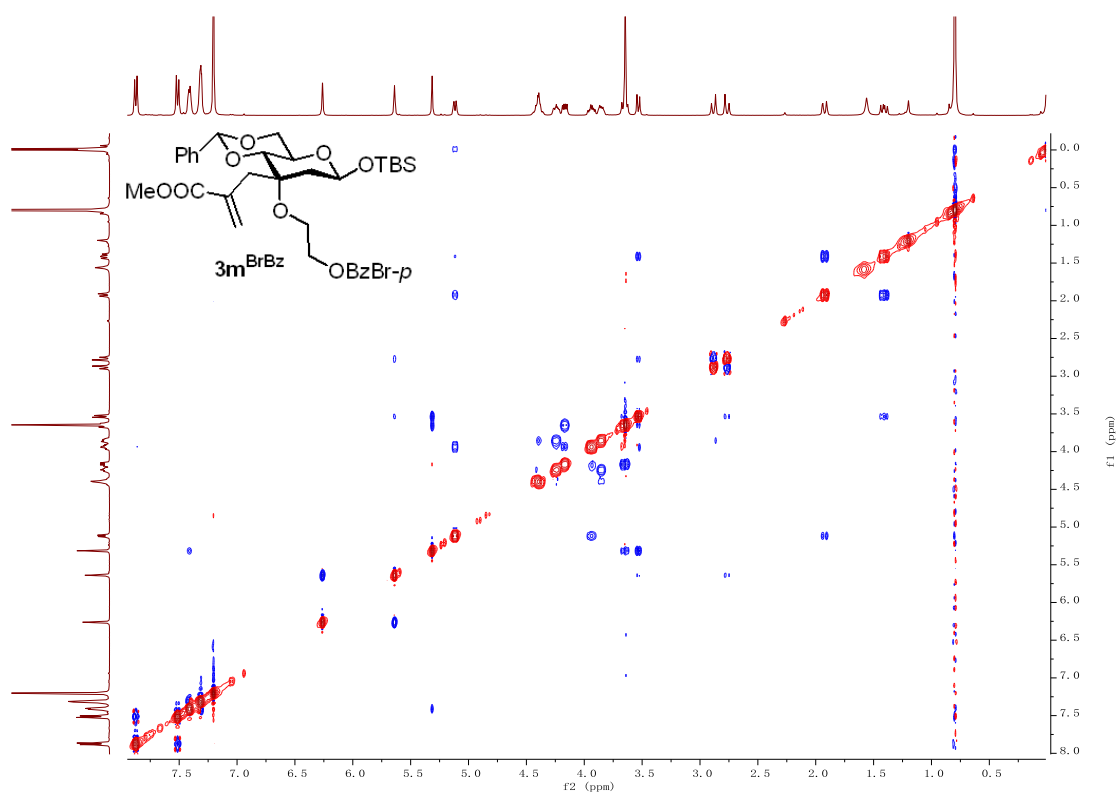

**NOESY Spectra of compound 3m<sup>Br</sup>Bz**

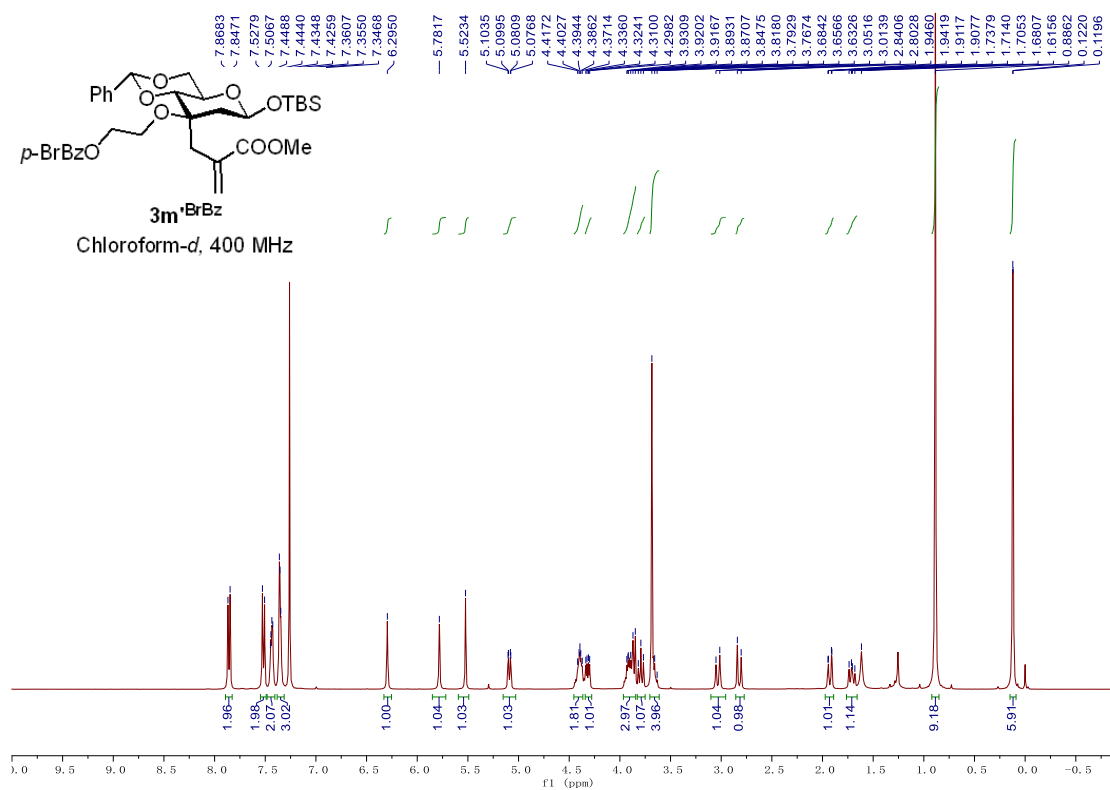

**<sup>1</sup>H NMR Spectra of compound 3m<sup>r</sup>BrBz**

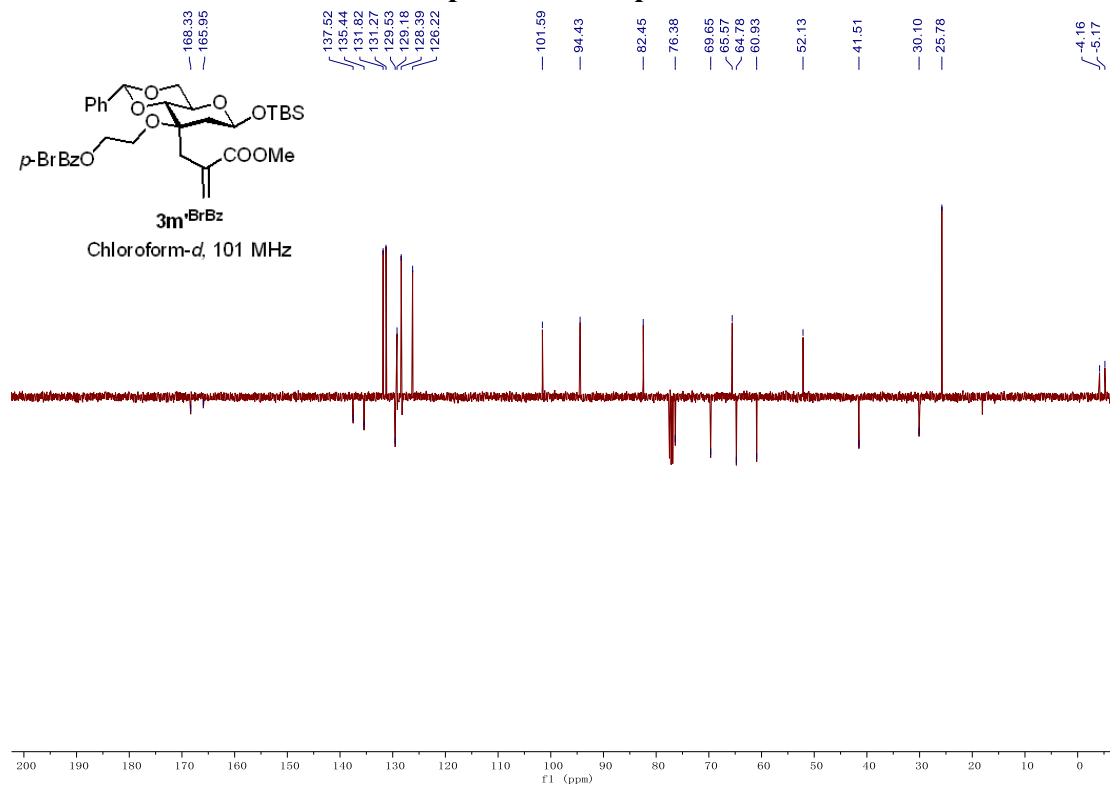

**<sup>13</sup>C NMR Spectra of compound 3m<sup>r</sup>BrBz**

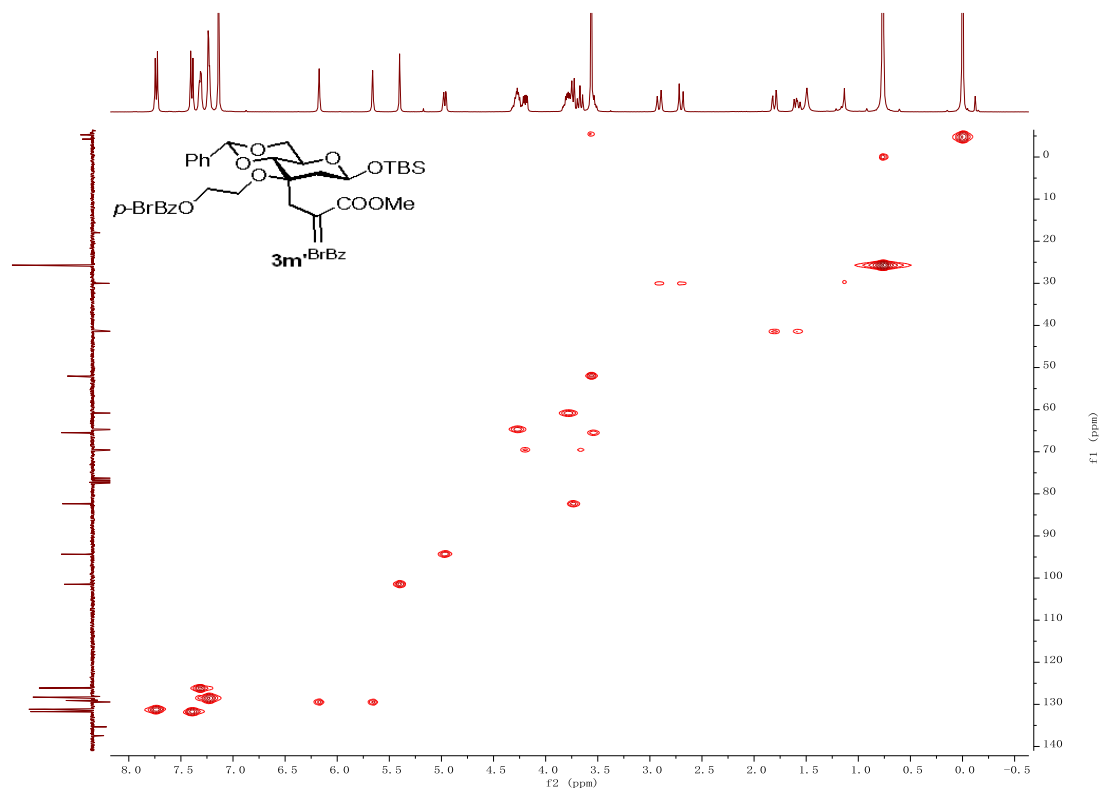

HSQC Spectra of compound **3m'BrBz**

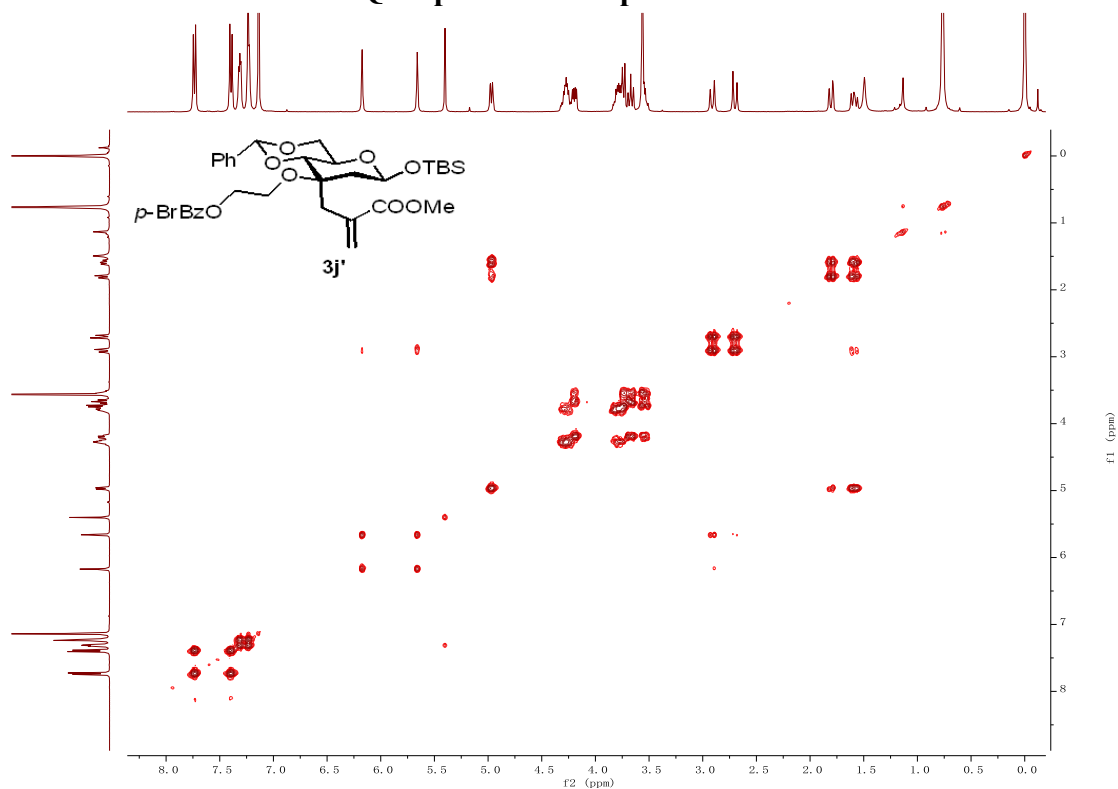

COSY Spectra of compound **3m'BrBz**

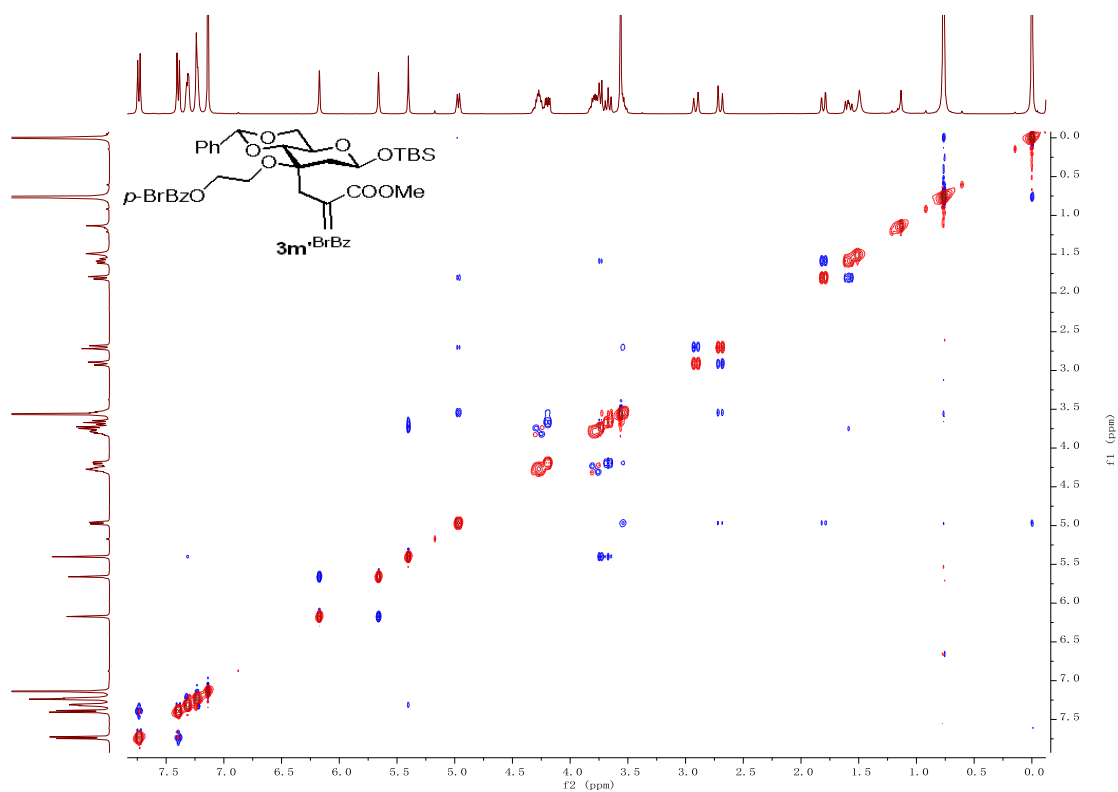

NOESY Spectra of compound 3m' BrBz

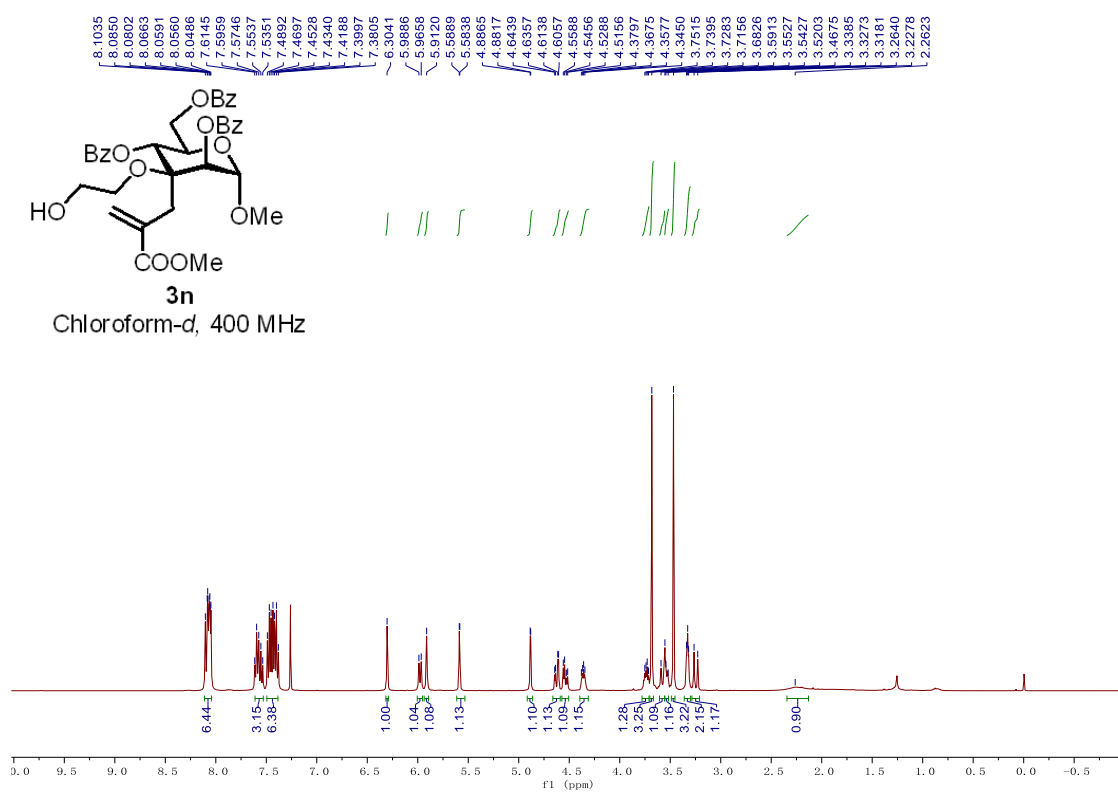

<sup>1</sup>H NMR Spectra of compound 3n



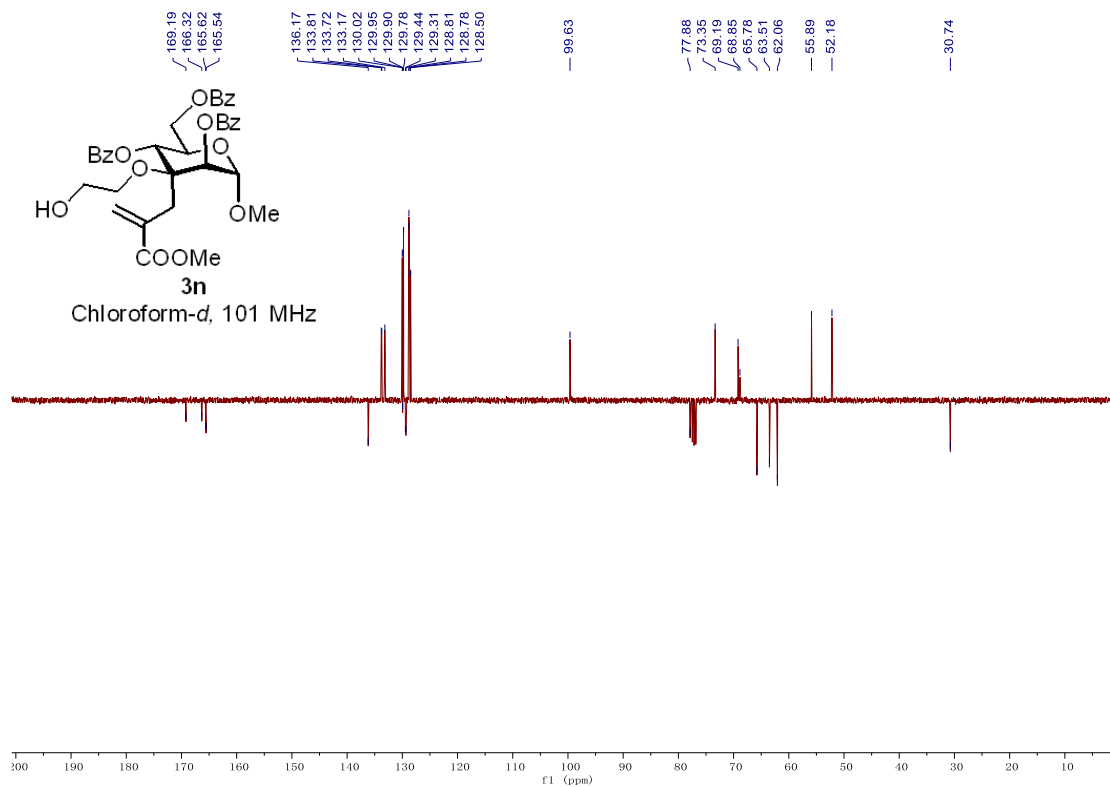

### <sup>13</sup>C NMR Spectra of compound 3n

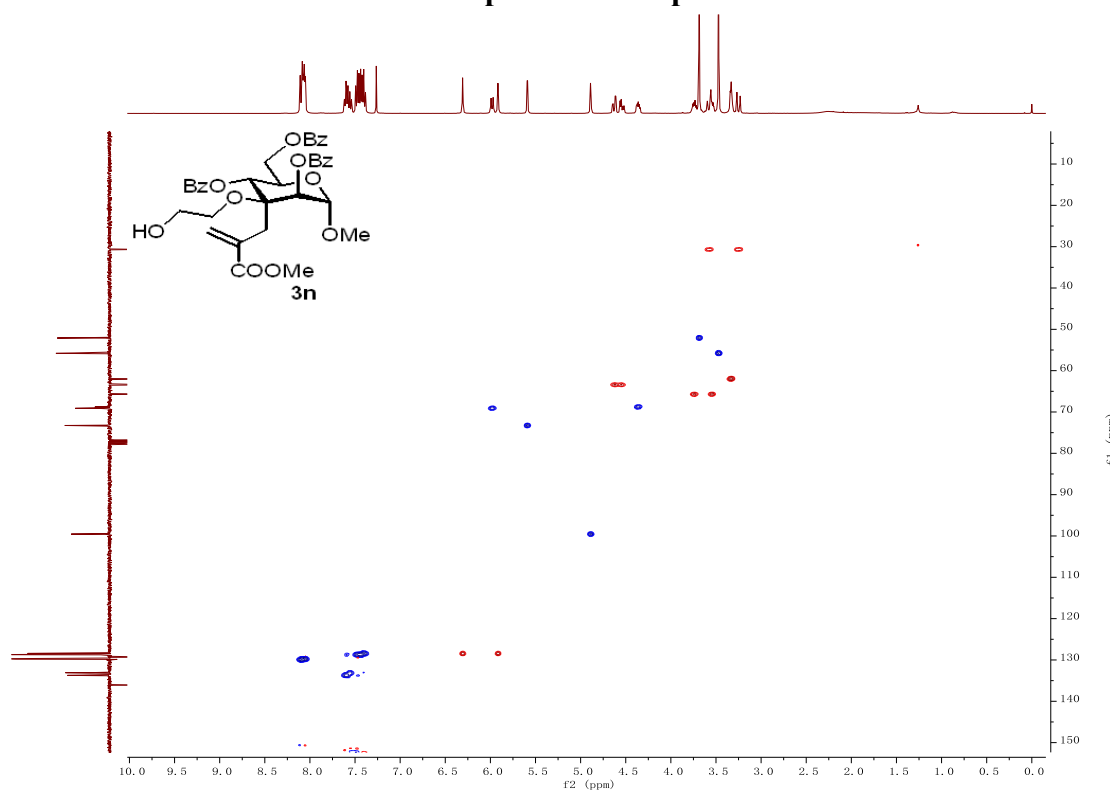

### HSQC Spectra of compound 3n

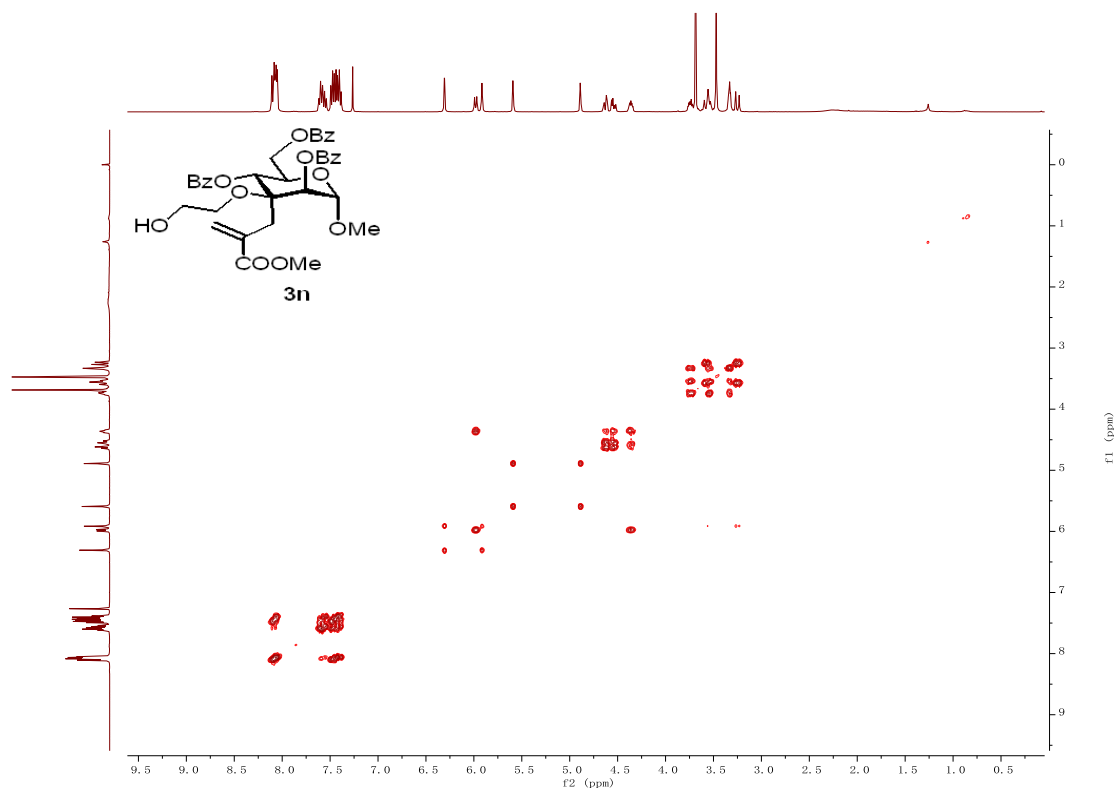

**COSY Spectra of compound 3n**

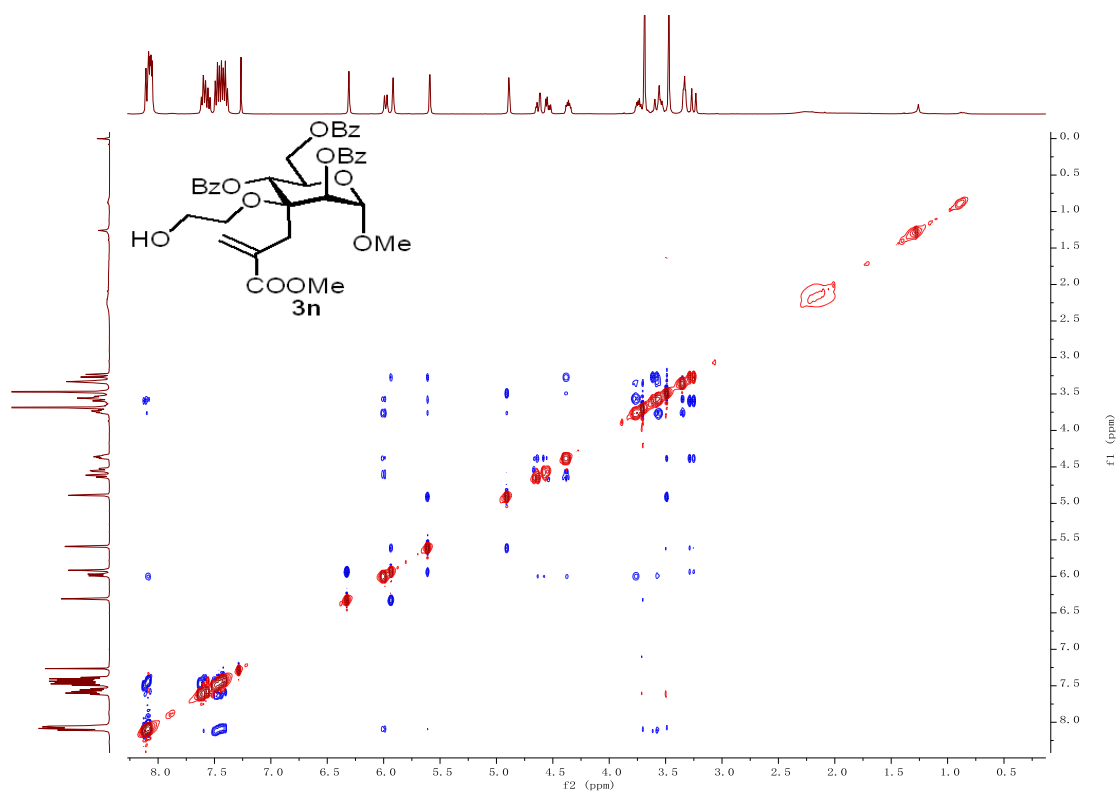

**NOESY Spectra of compound 3n**

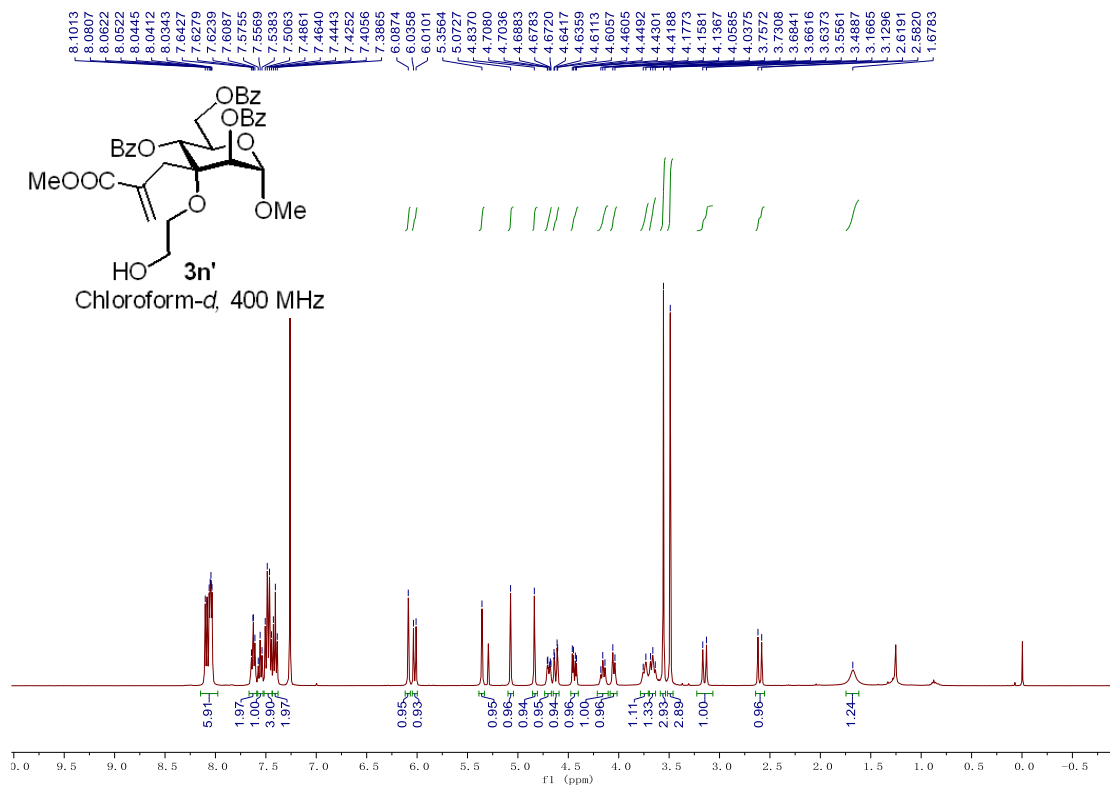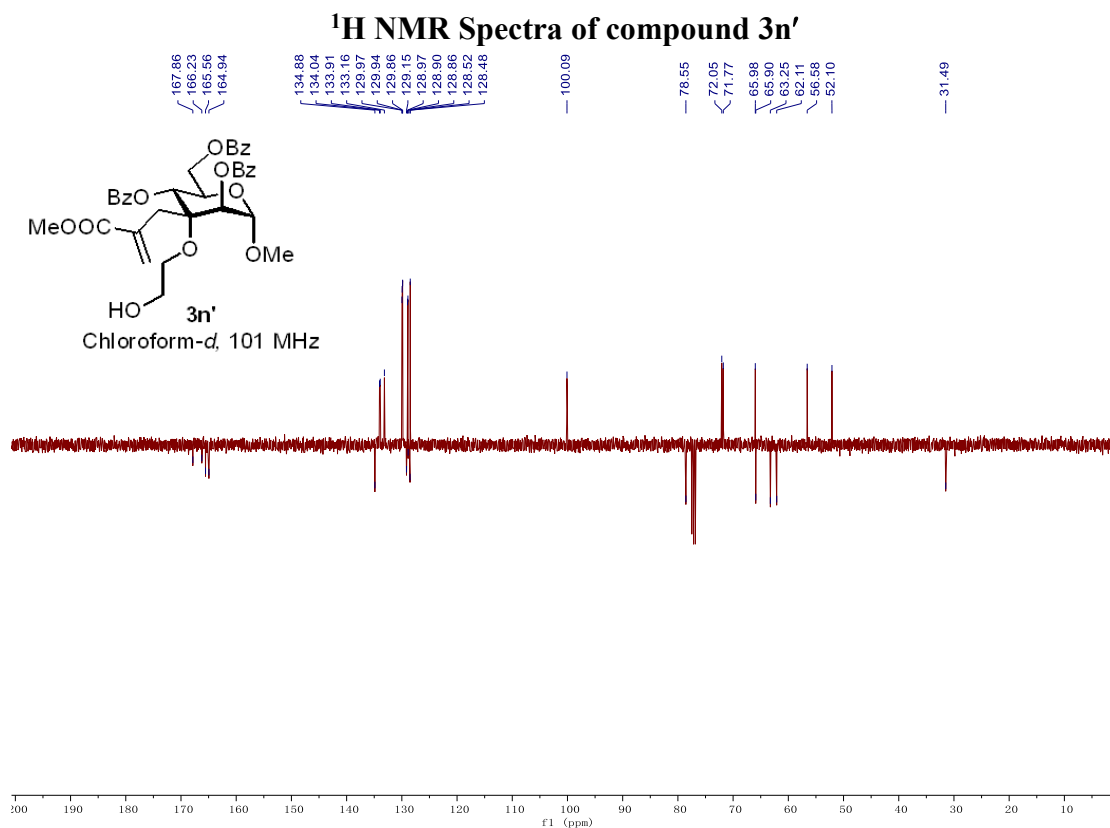

**<sup>13</sup>C NMR Spectra of compound 3n'**

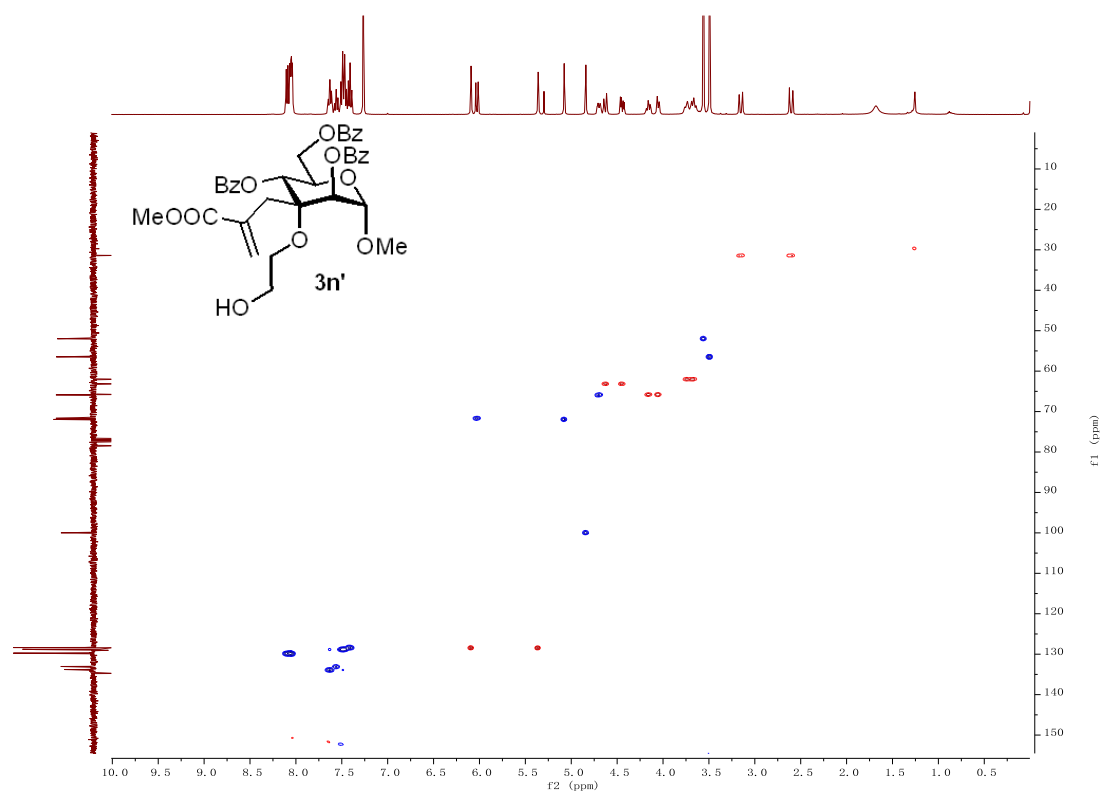

**HSQC Spectra of compound 3n'**

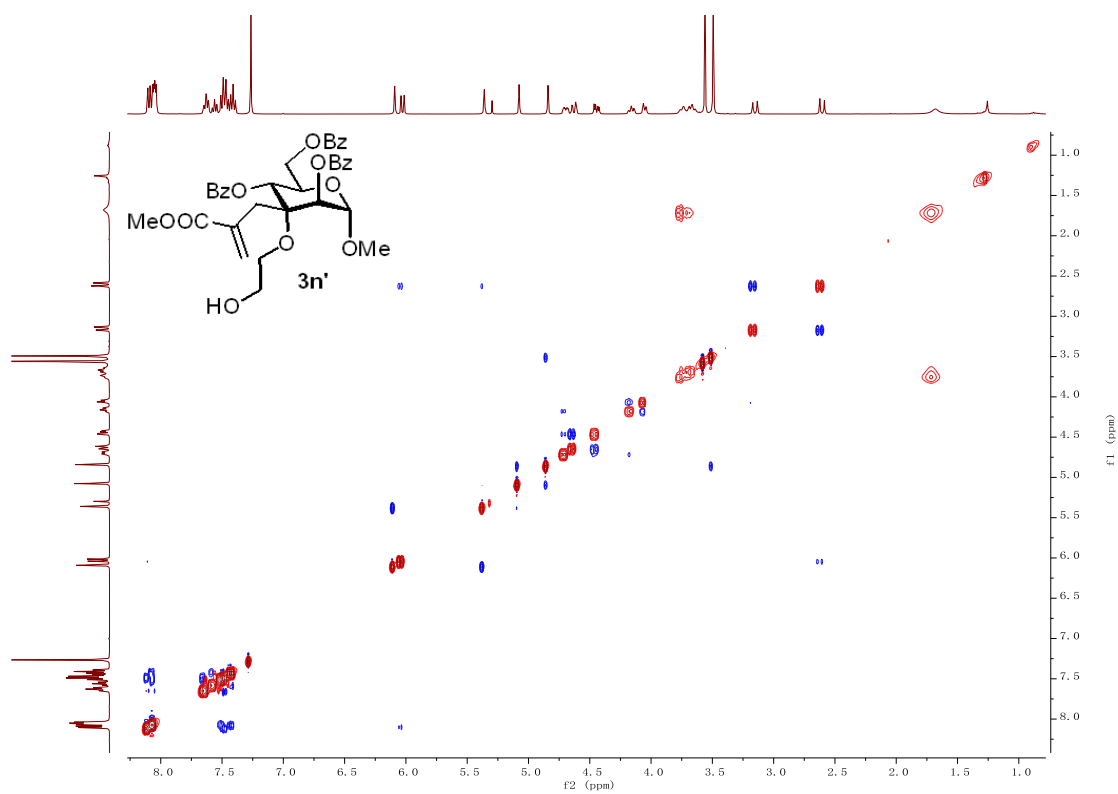

**NOESY Spectra of compound 3n'**

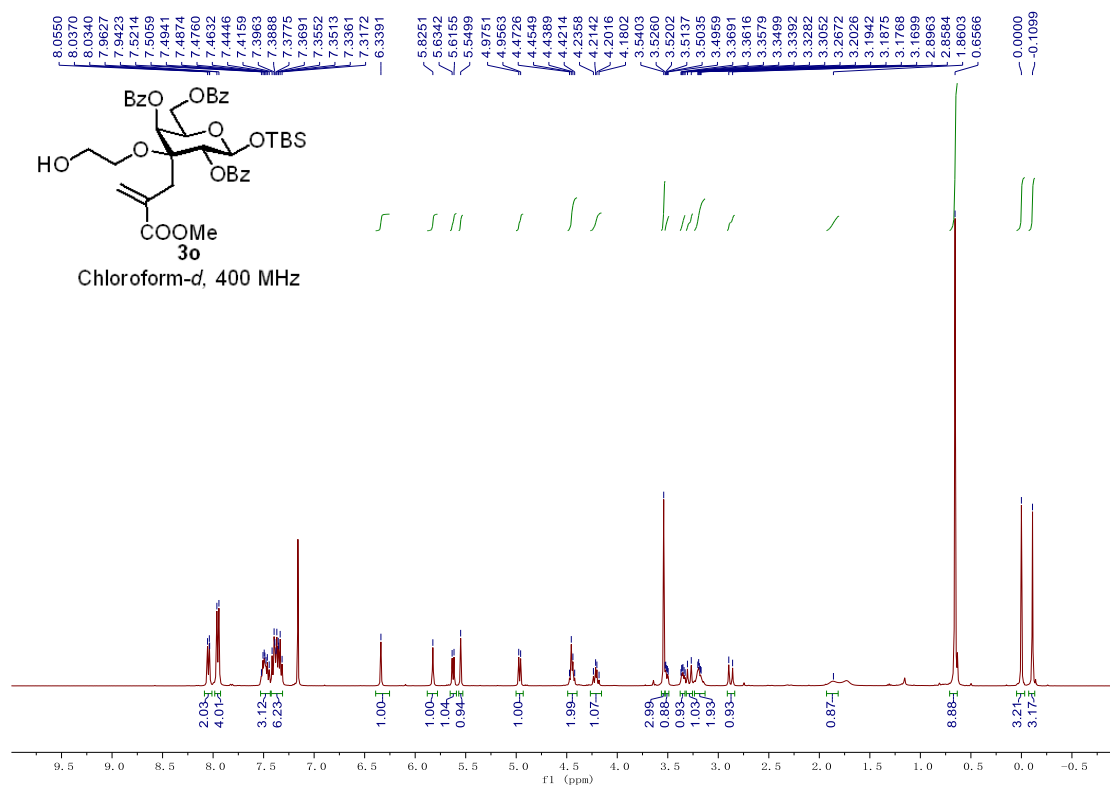

**<sup>1</sup>H NMR Spectra of compound 3o**

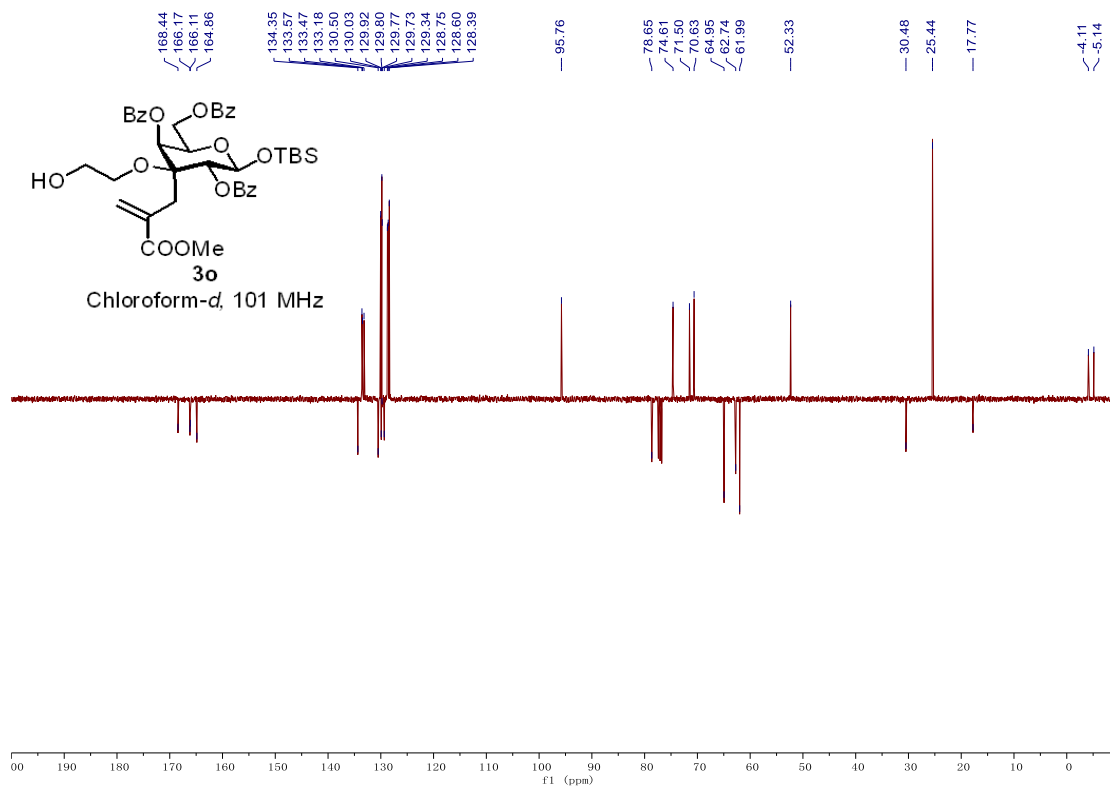

**<sup>13</sup>C NMR Spectra of compound 3o**

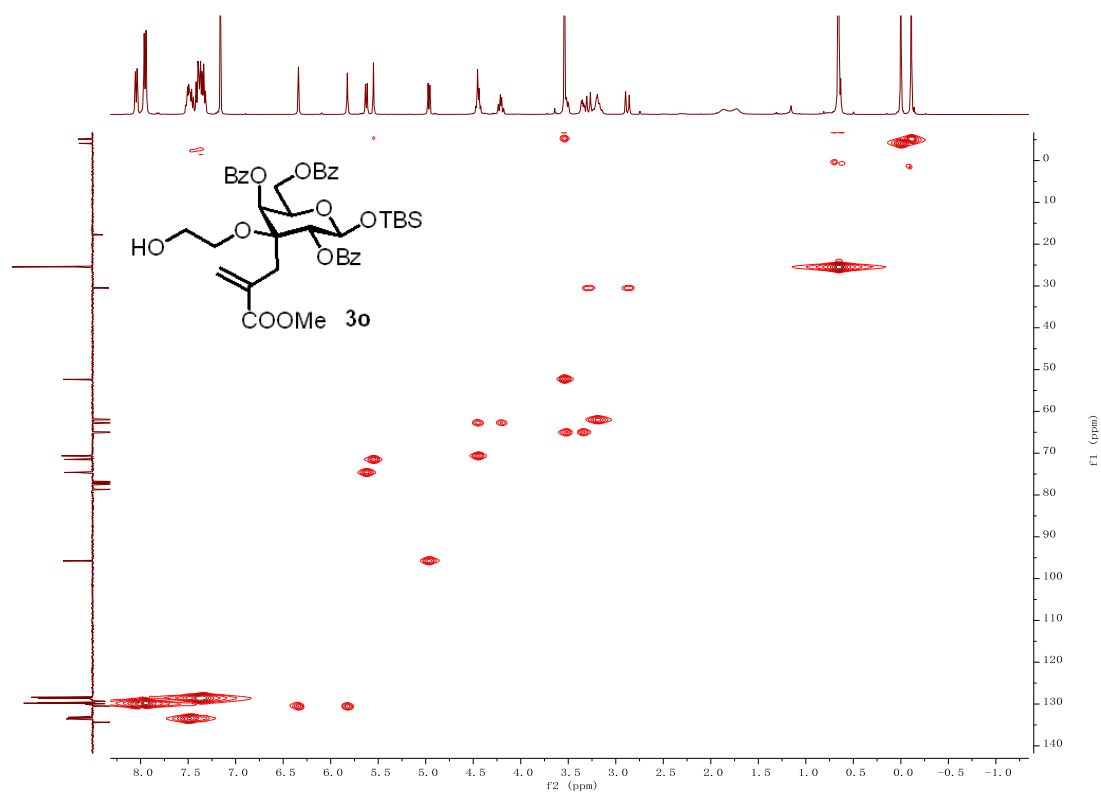

**HSQC Spectra of compound 3o**

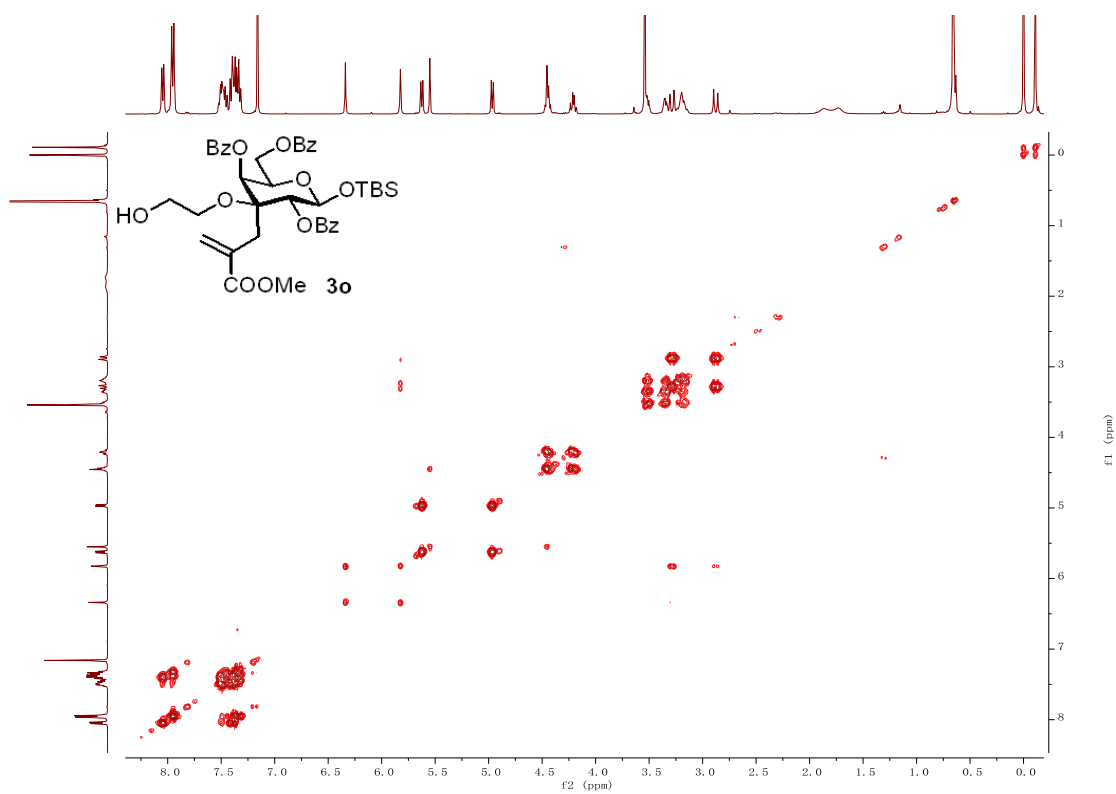

**COSY Spectra of compound 3o**

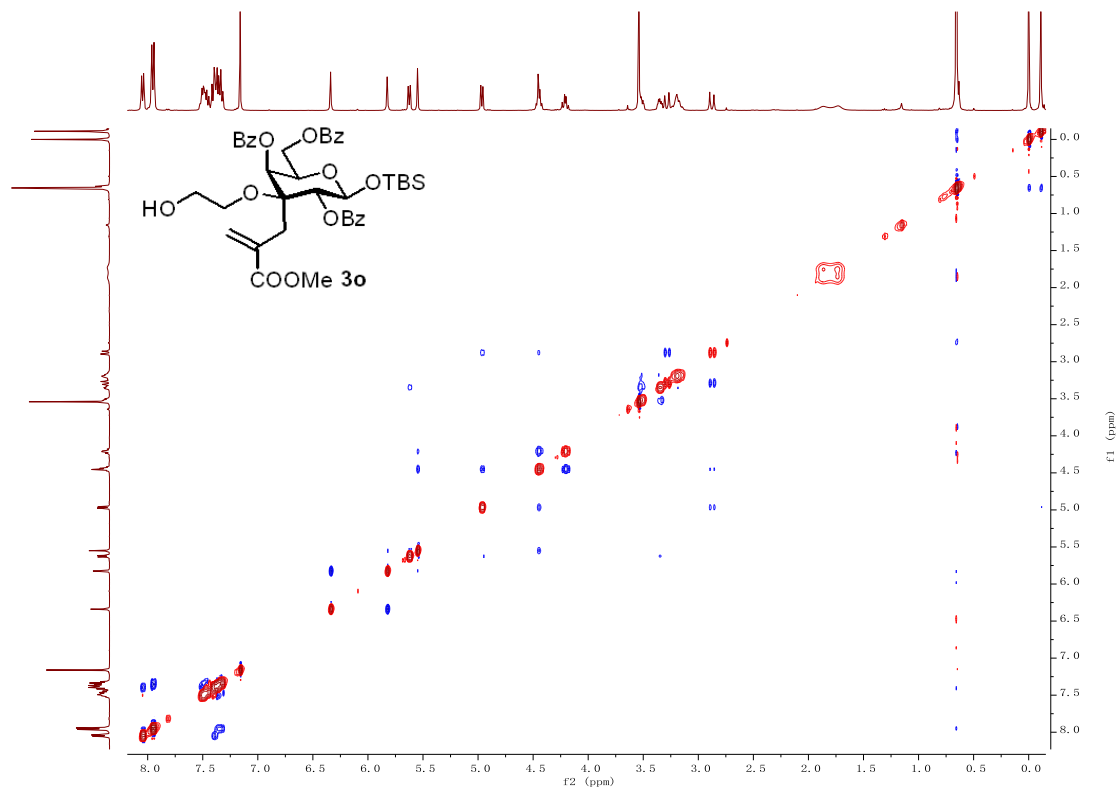

### NOESY Spectra of compound 3o

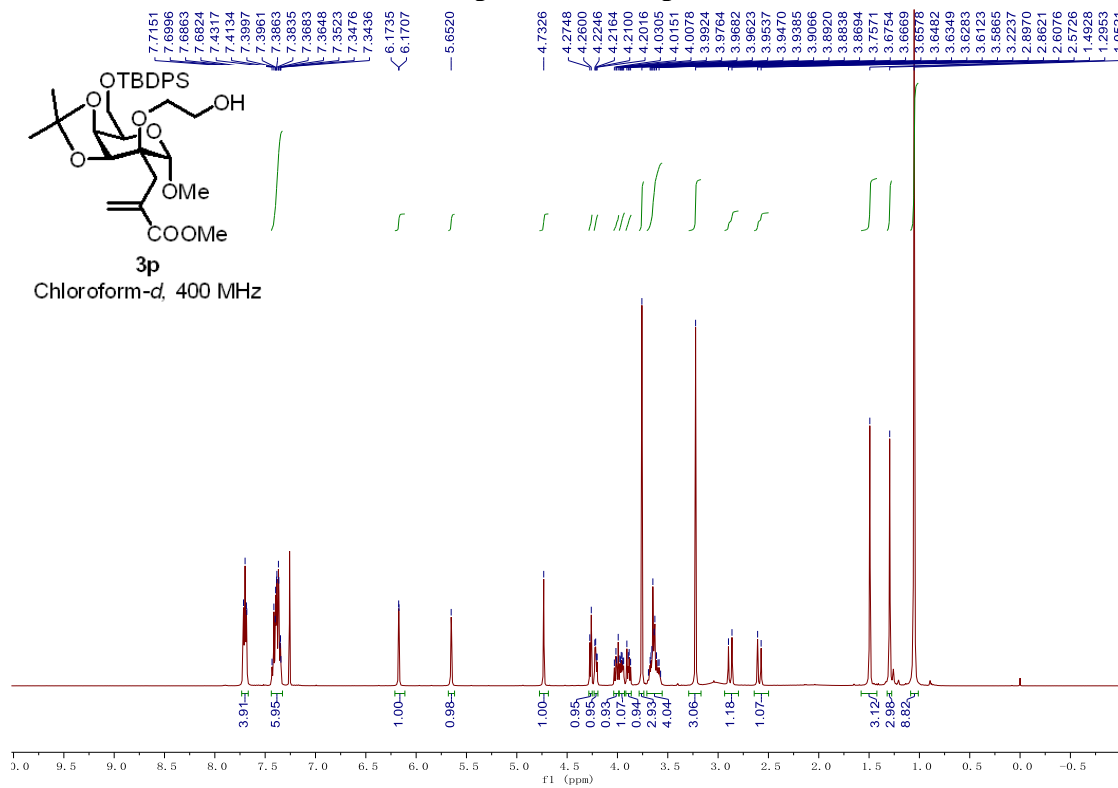

### <sup>1</sup>H NMR Spectra of compound 3p

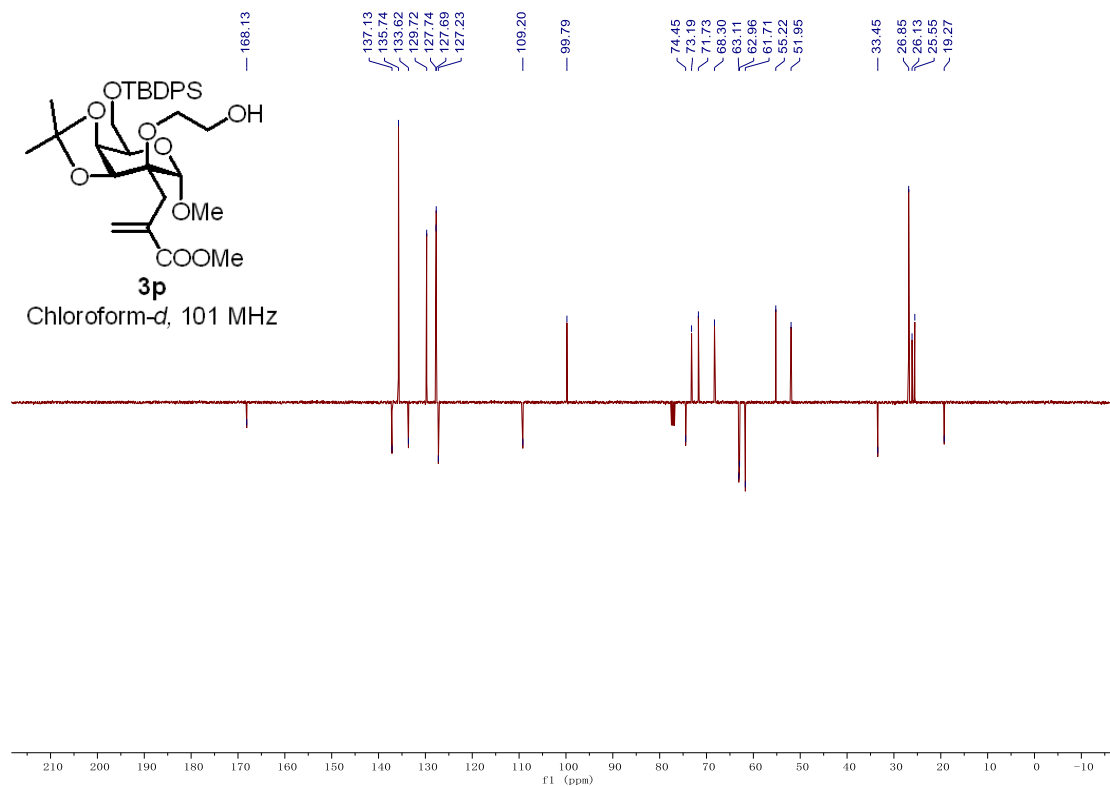

### $^{13}\text{C}$ NMR Spectra of compound **3p**

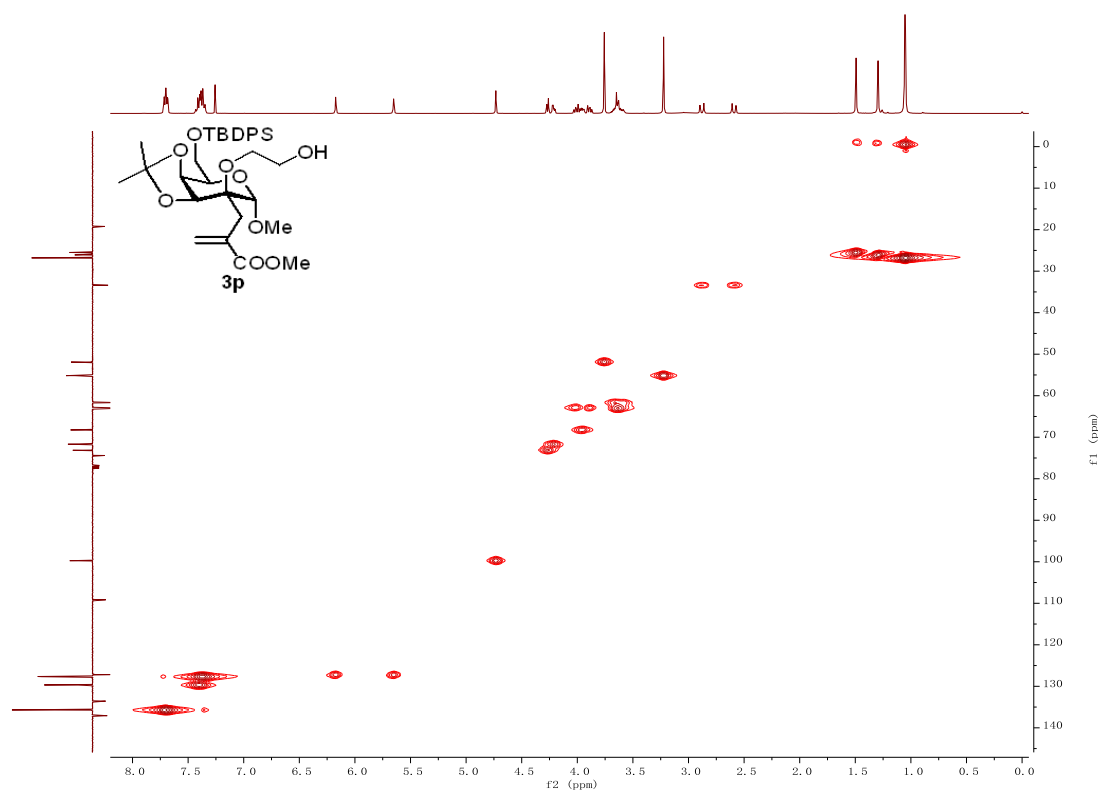

### HSQC Spectra of compound **3p**



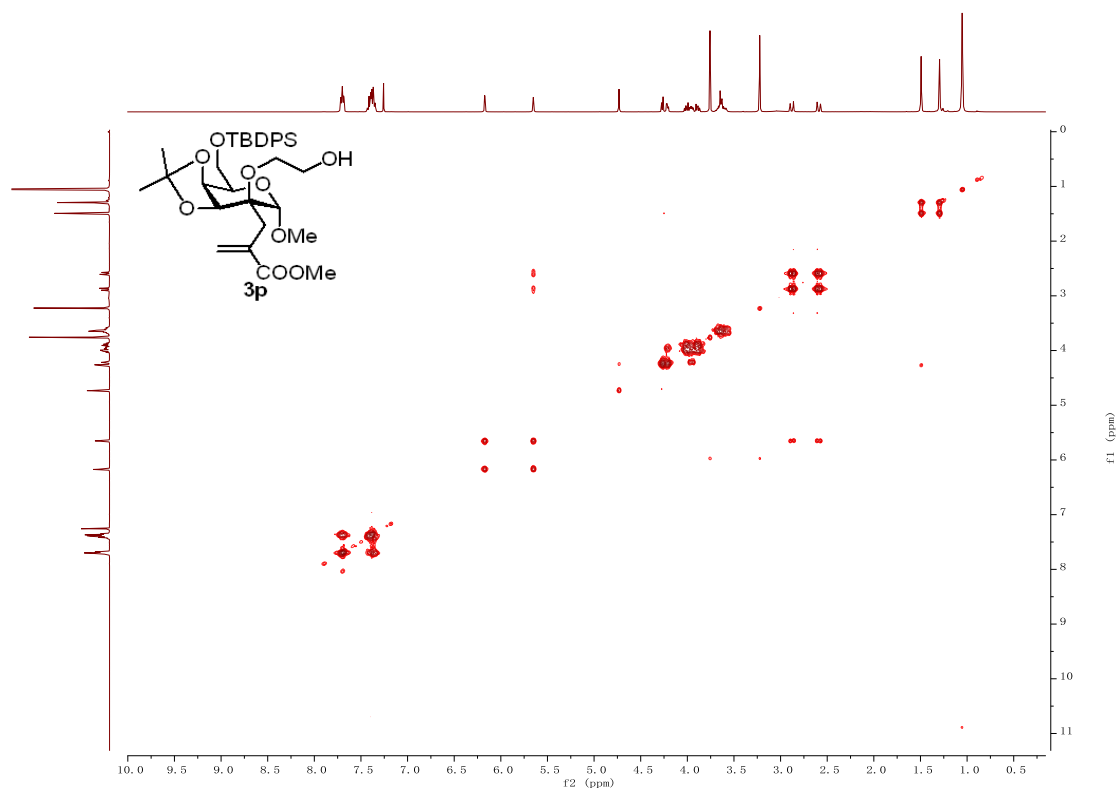

**COSY Spectra of compound 3p**

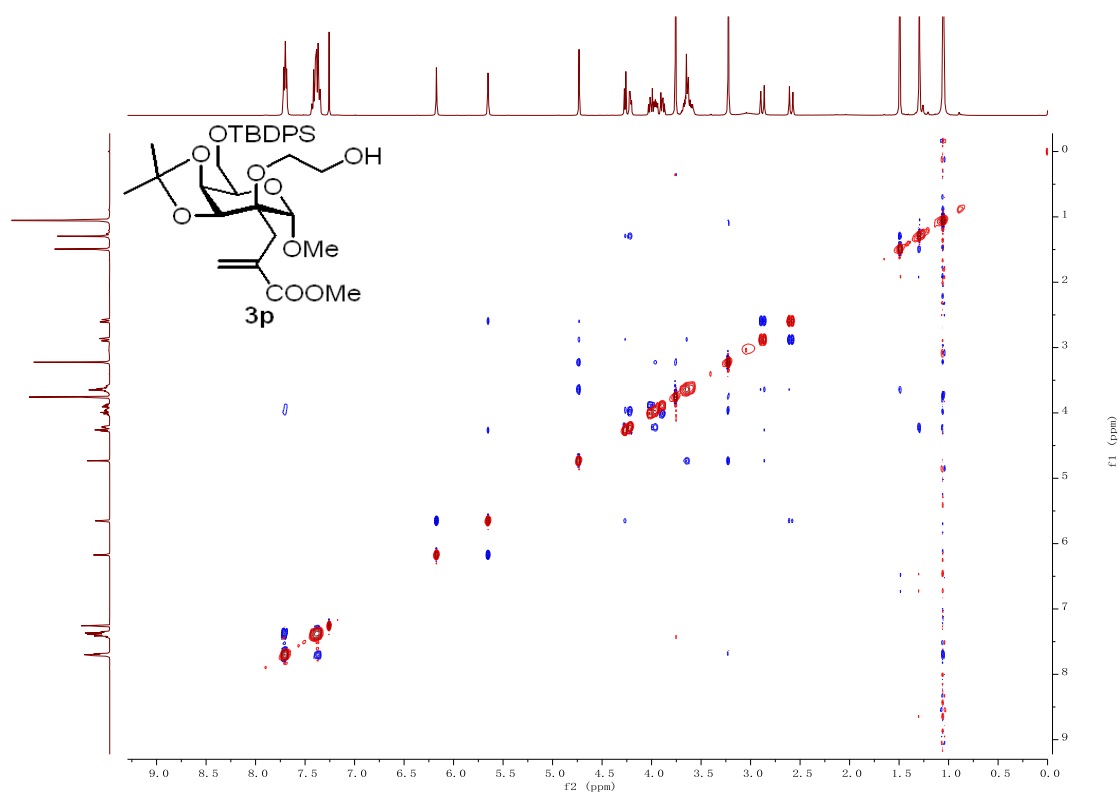

**NOESY Spectra of compound 3p**

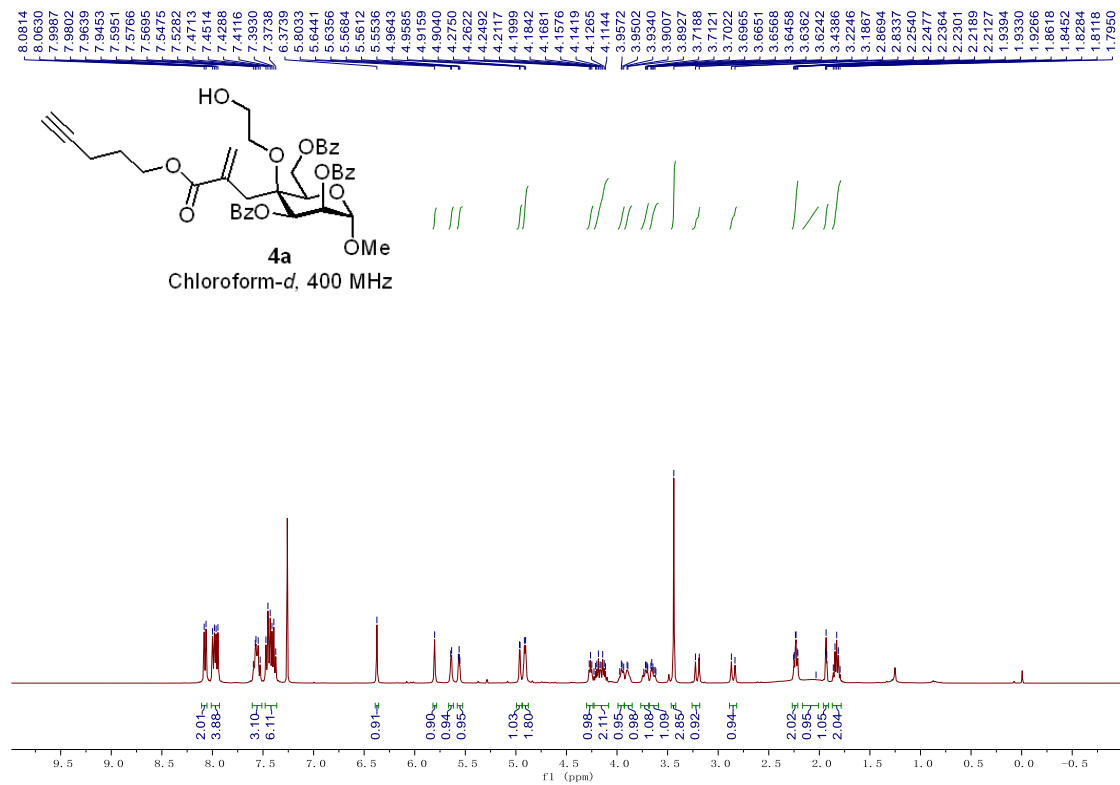

**<sup>1</sup>H NMR Spectra of compound 4a**

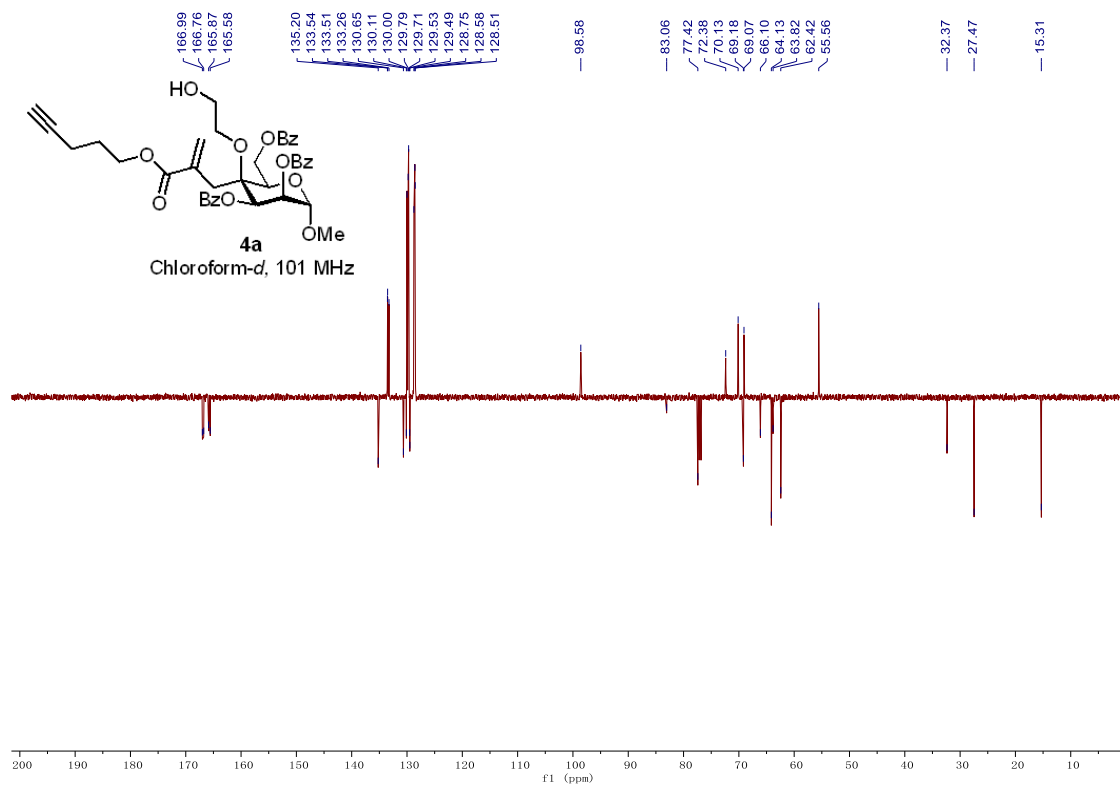

**<sup>13</sup>C NMR Spectra of compound 4a**

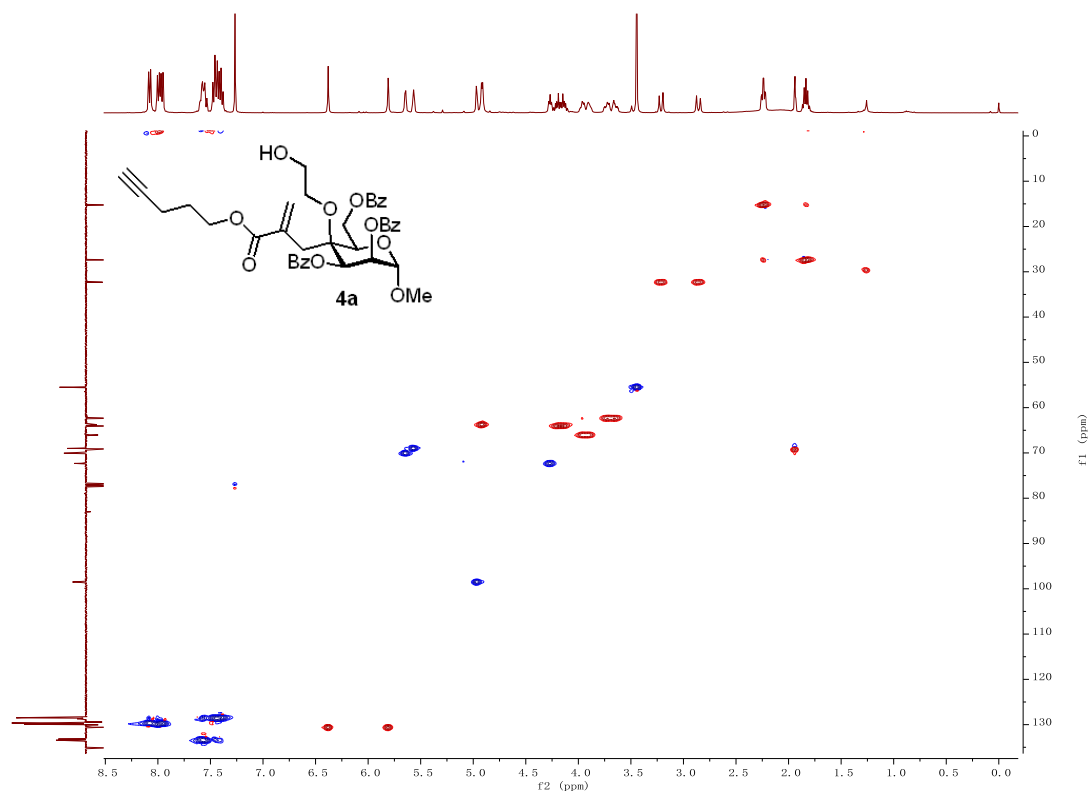

**HSQC Spectra of compound 4a**

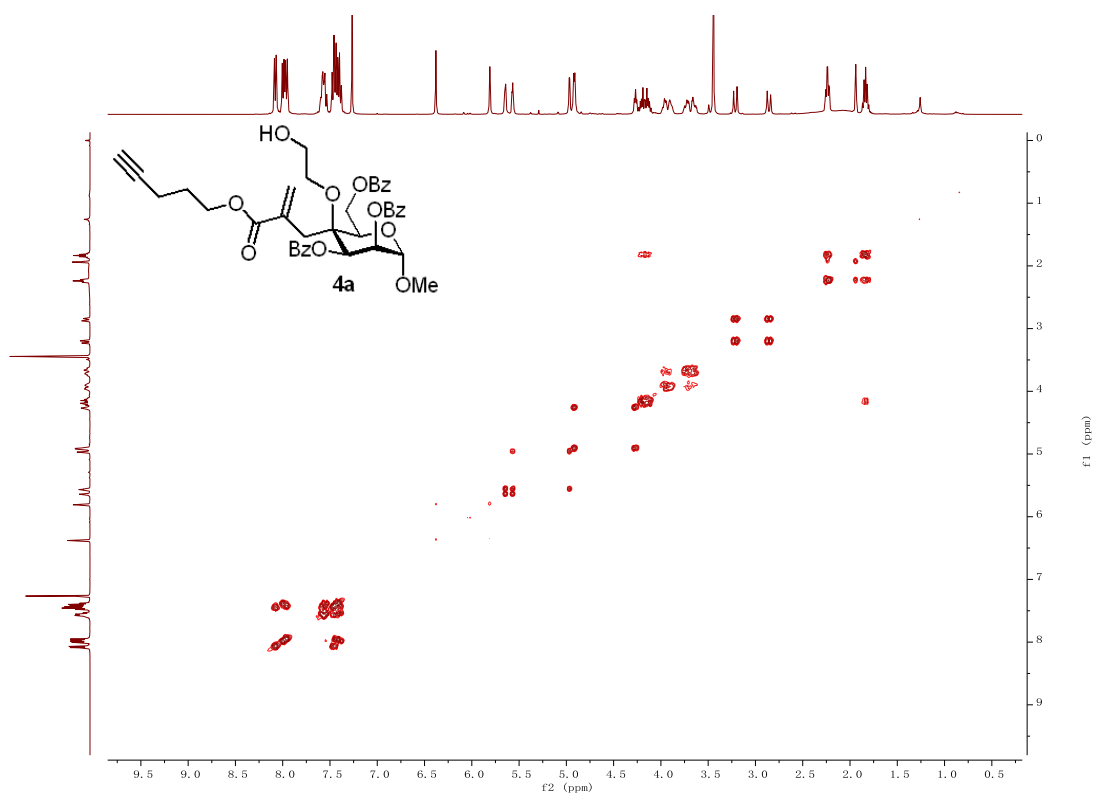

**COSY Spectra of compound 4a**

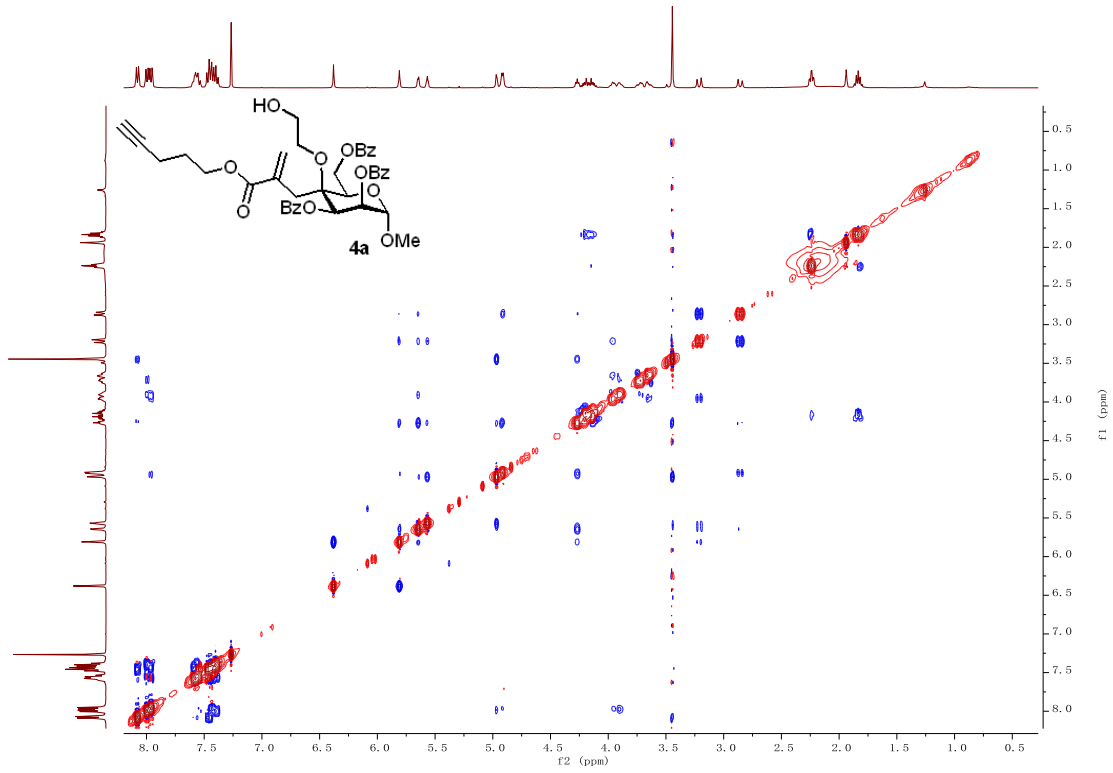

**NOESY Spectra of compound 4a**

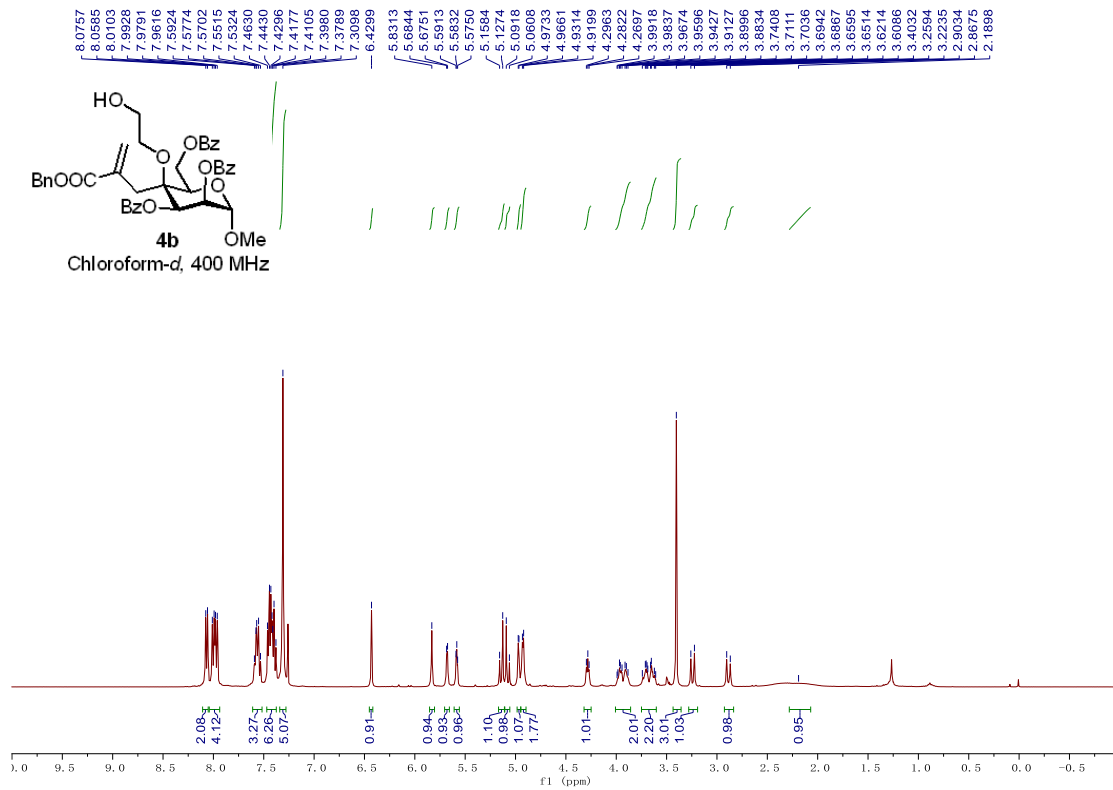

**<sup>1</sup>H NMR Spectra of compound 4b**

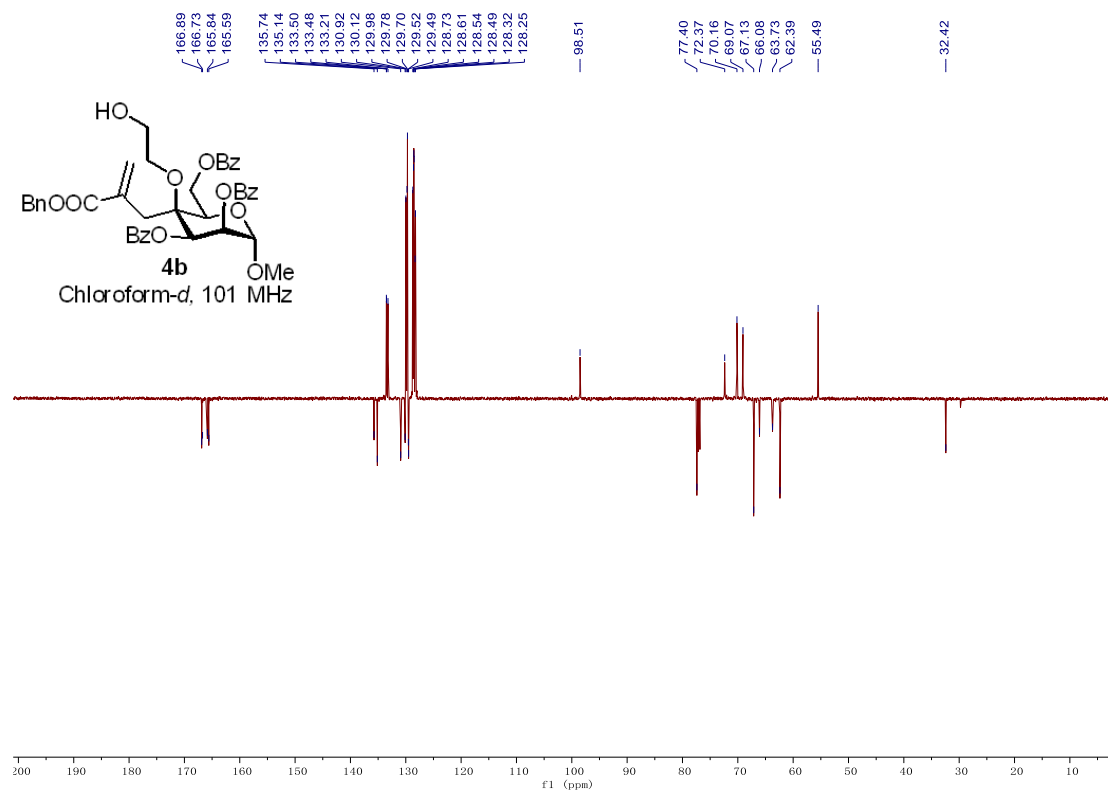

**$^{13}\text{C}$  NMR Spectra of compound **4b****

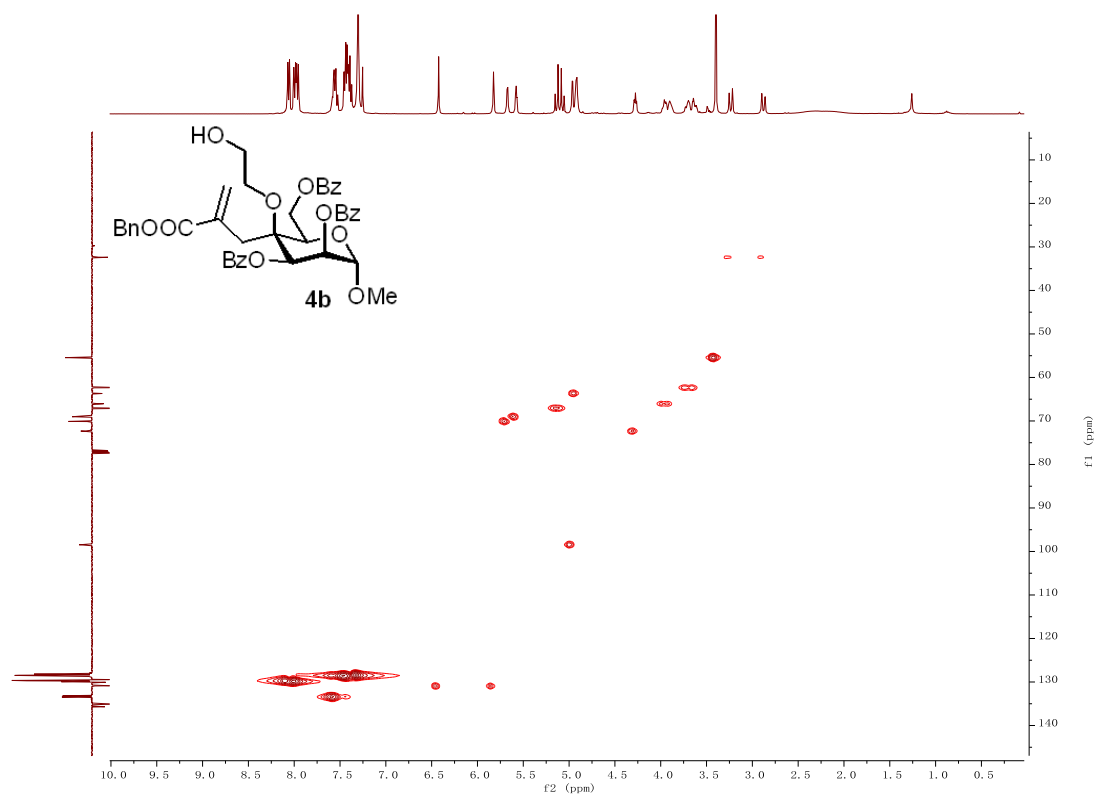

**HSQC Spectra of compound **4b****

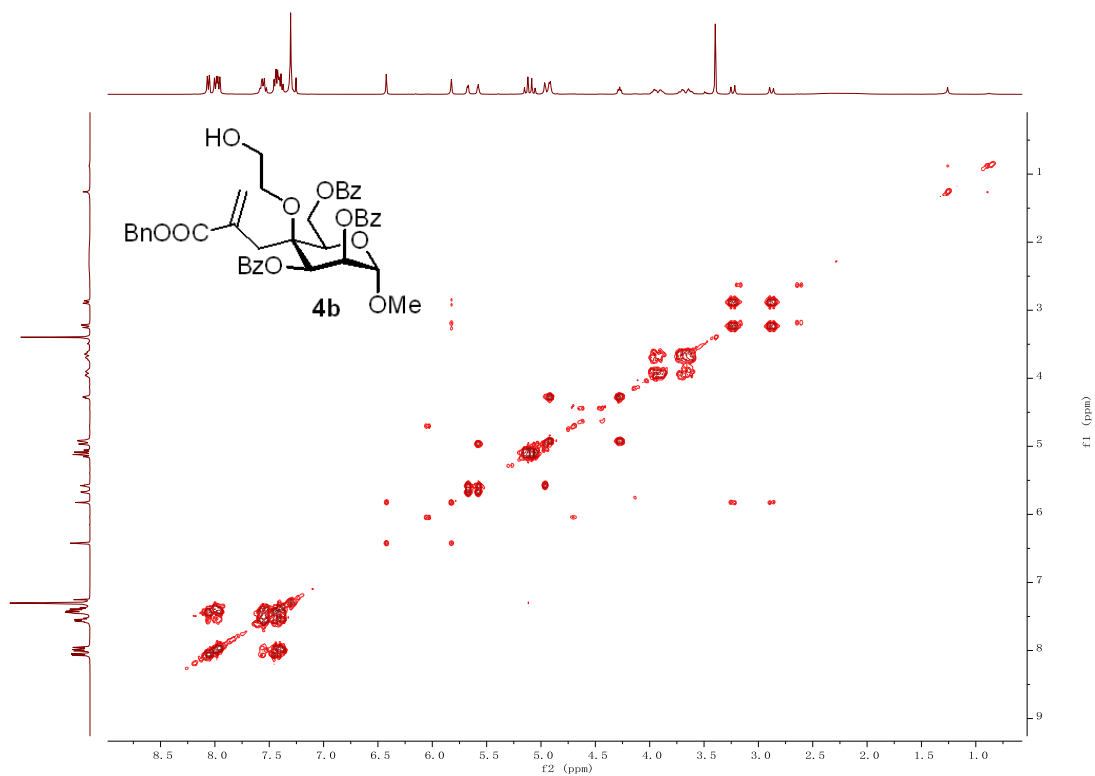

**COSY Spectra of compound 4b**

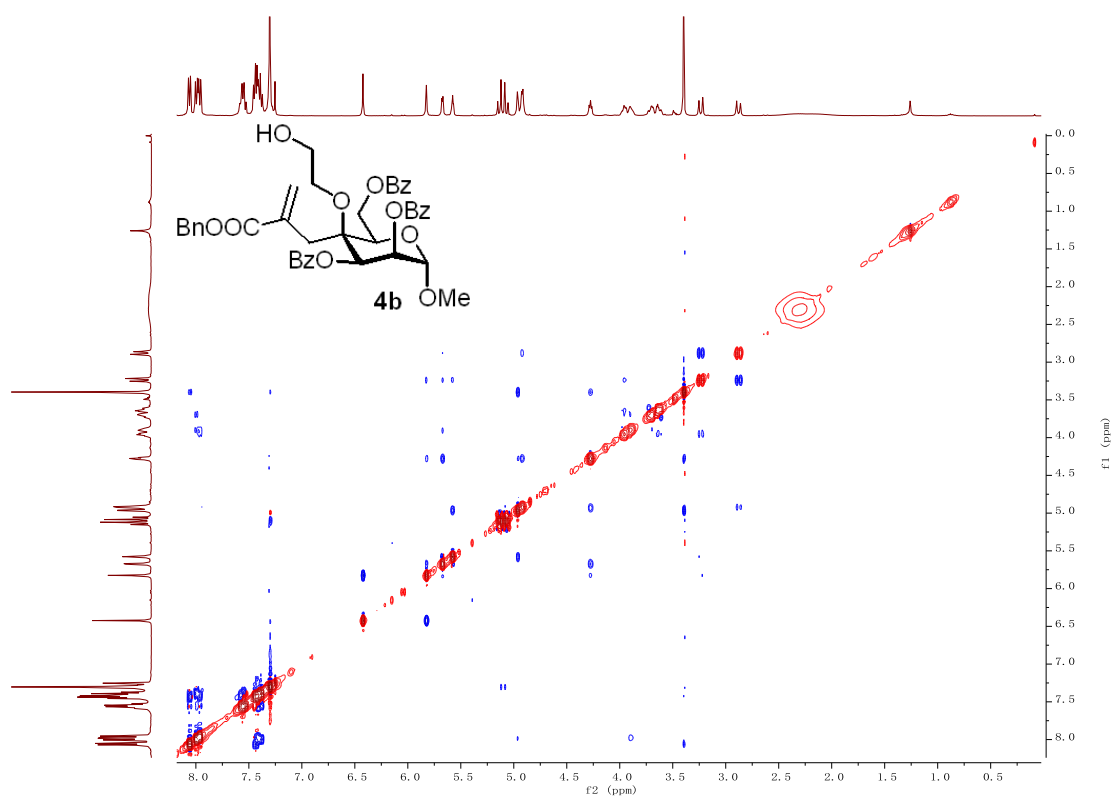

**NOESY Spectra of compound 4b**

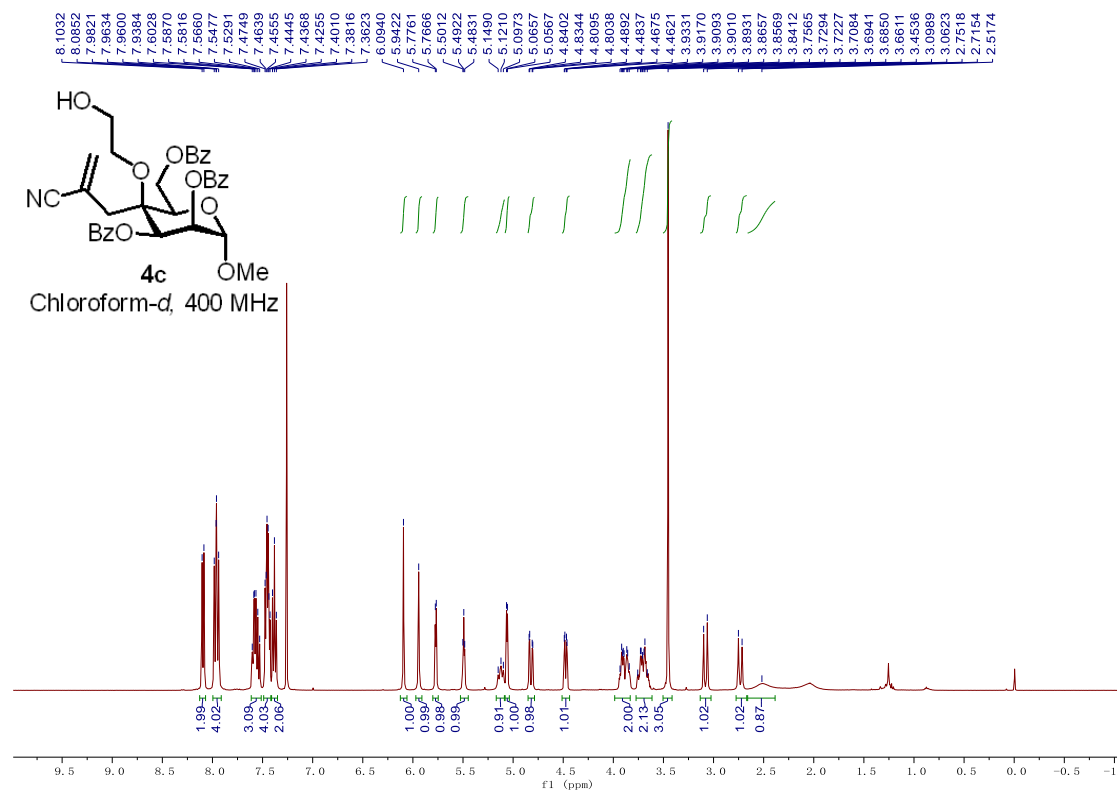

**<sup>1</sup>H NMR Spectra of compound 4c**

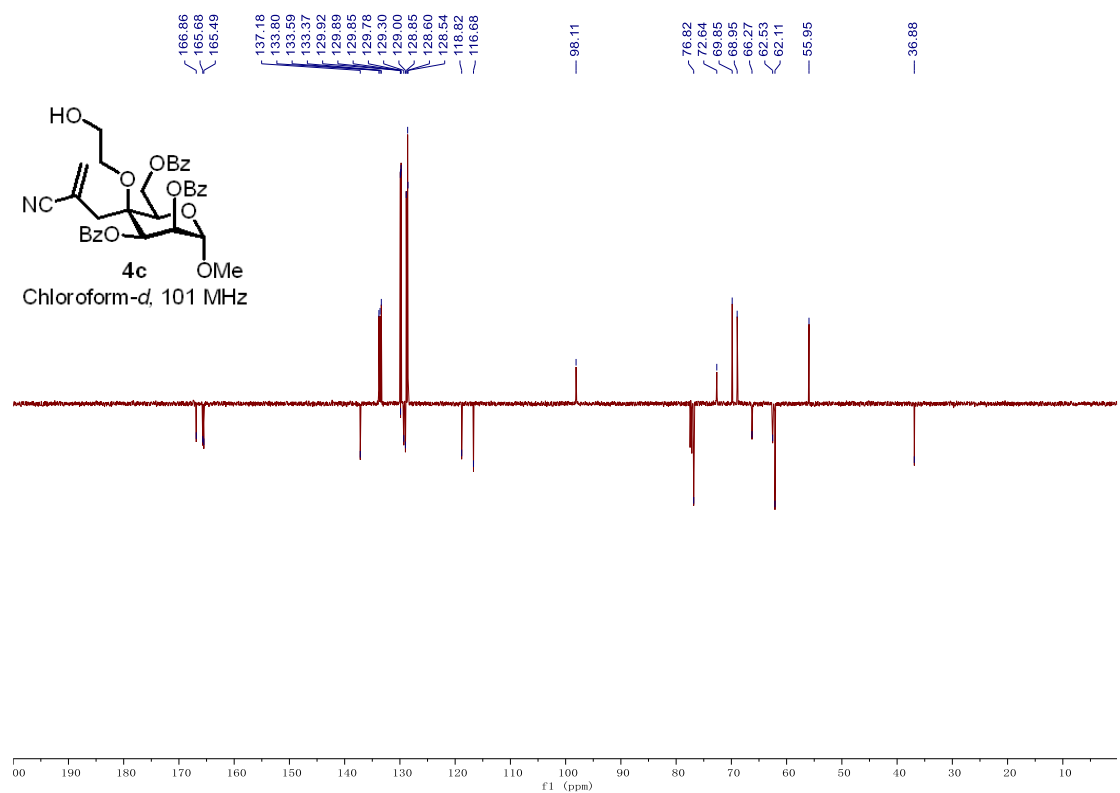

**<sup>13</sup>C NMR Spectra of compound 4c**

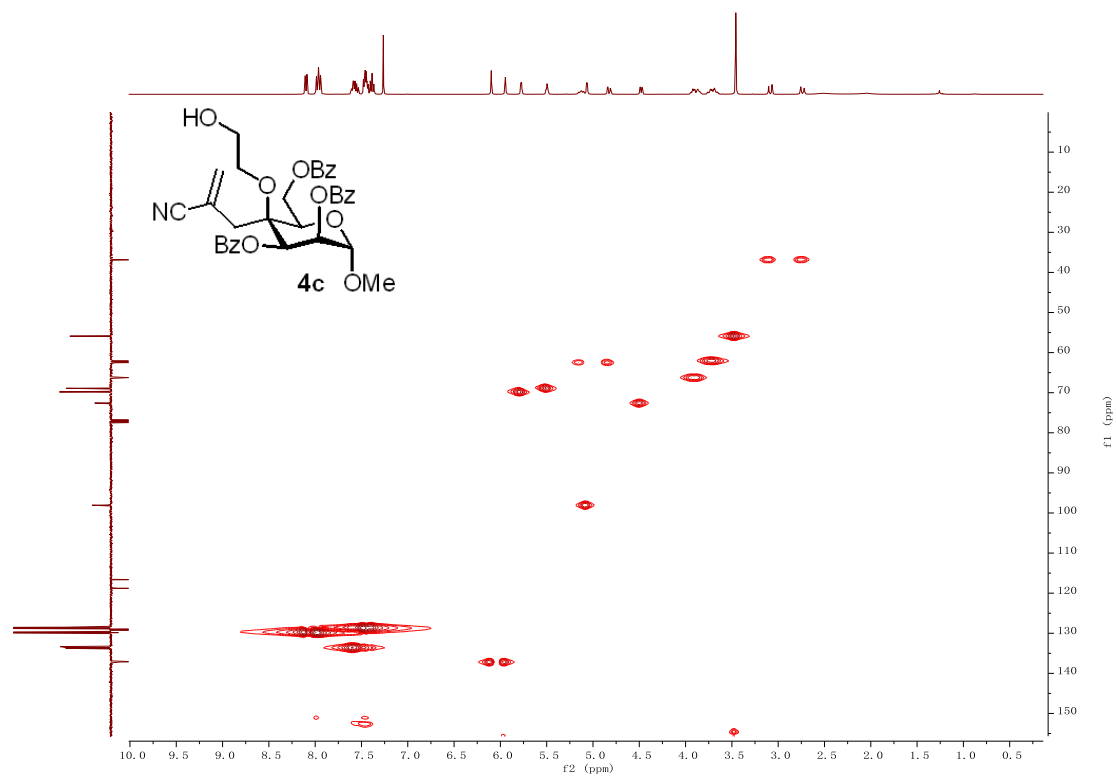

**HSQC Spectra of compound 4c**

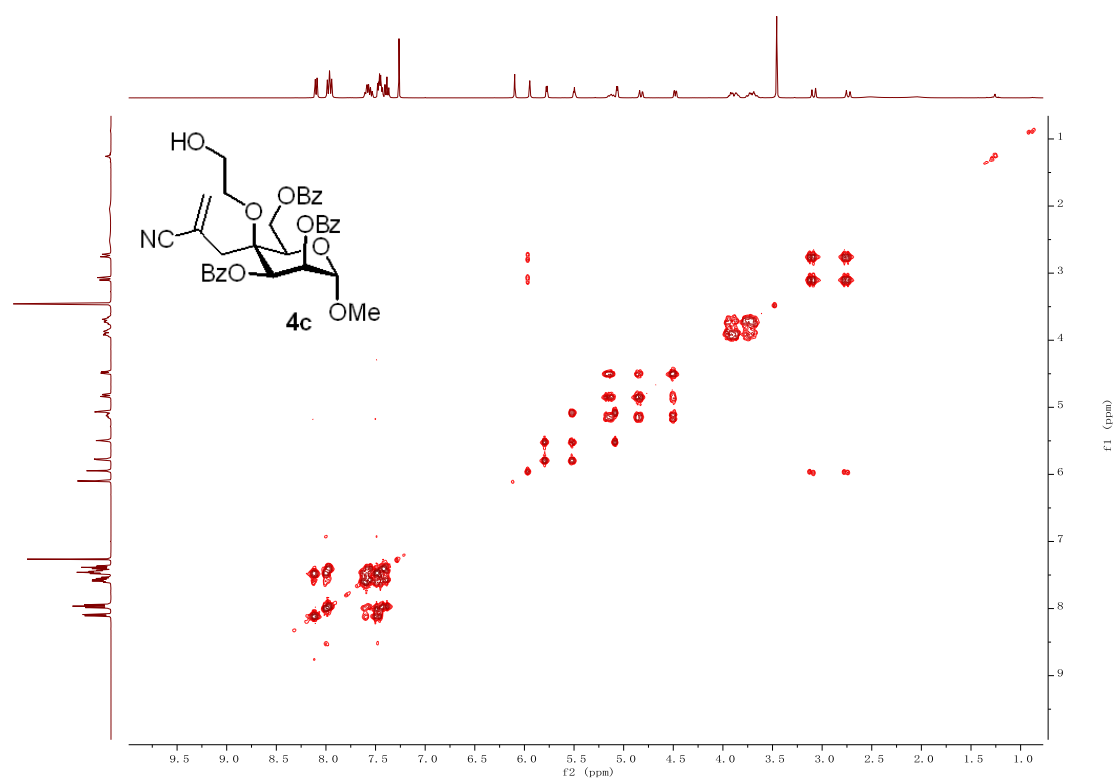

**COSY Spectra of compound 4c**



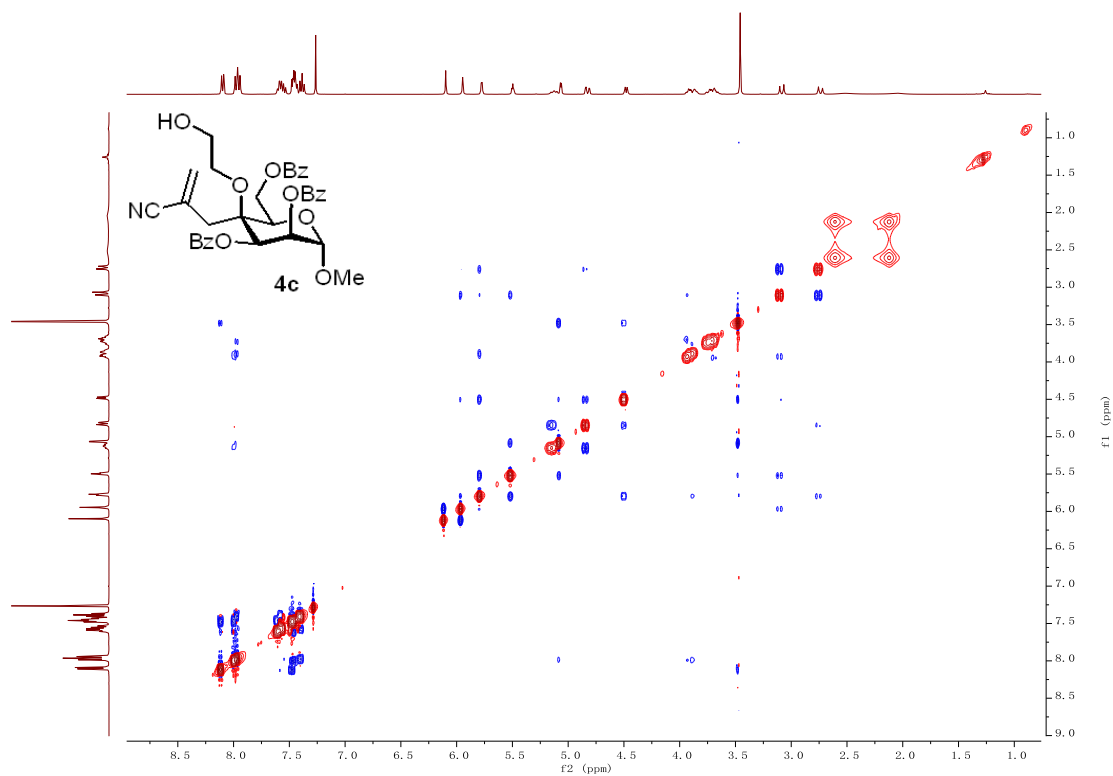

NOESY Spectra of compound 4c

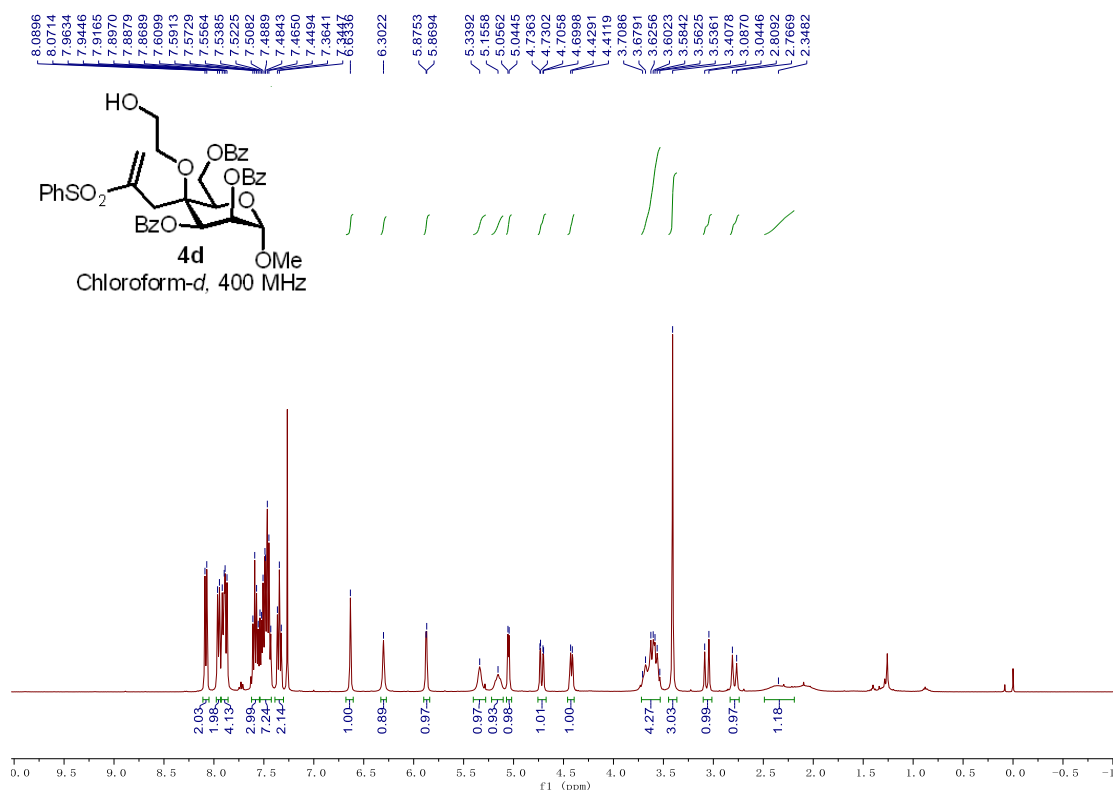

<sup>1</sup>H NMR Spectra of compound 4d

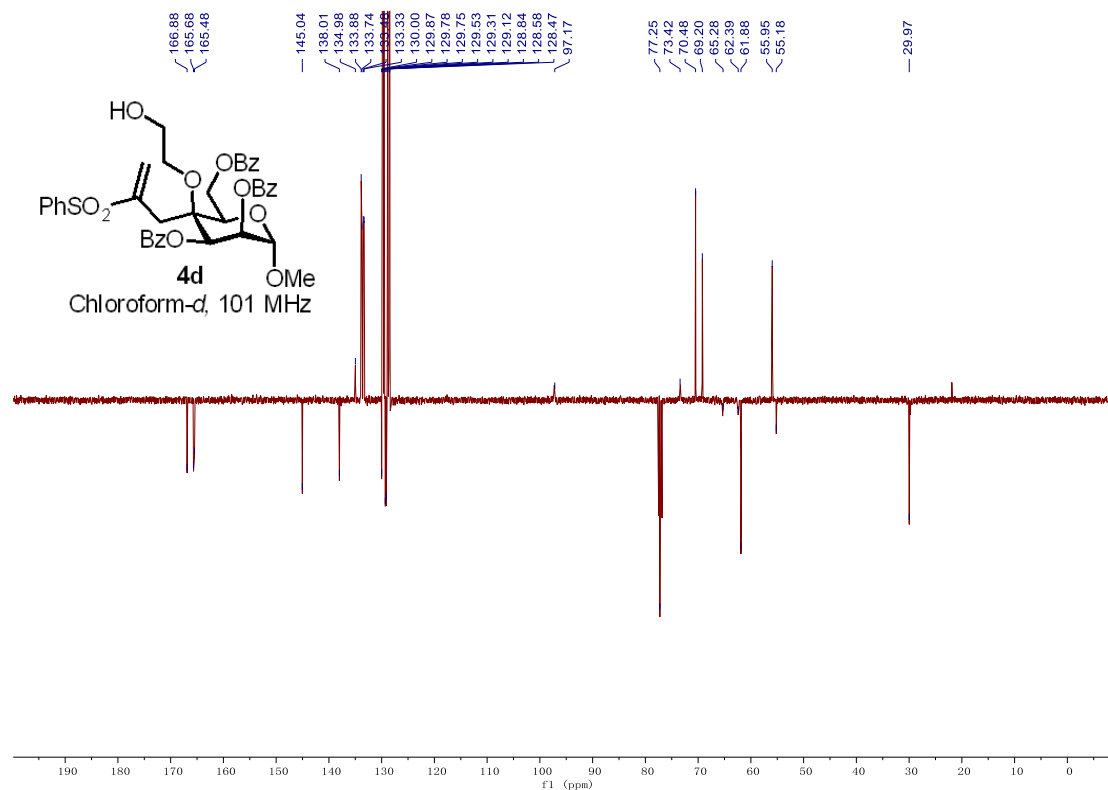

$^{13}\text{C}$  NMR Spectra of compound **4d**

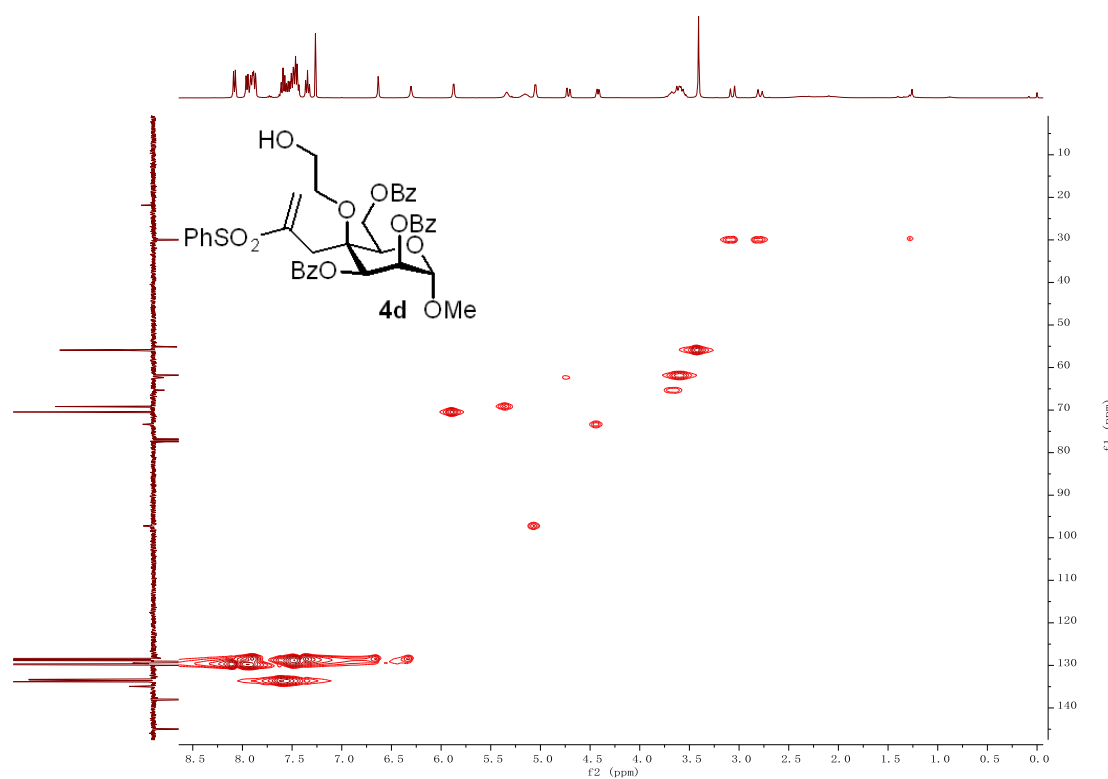

HSQC Spectra of compound **4d**

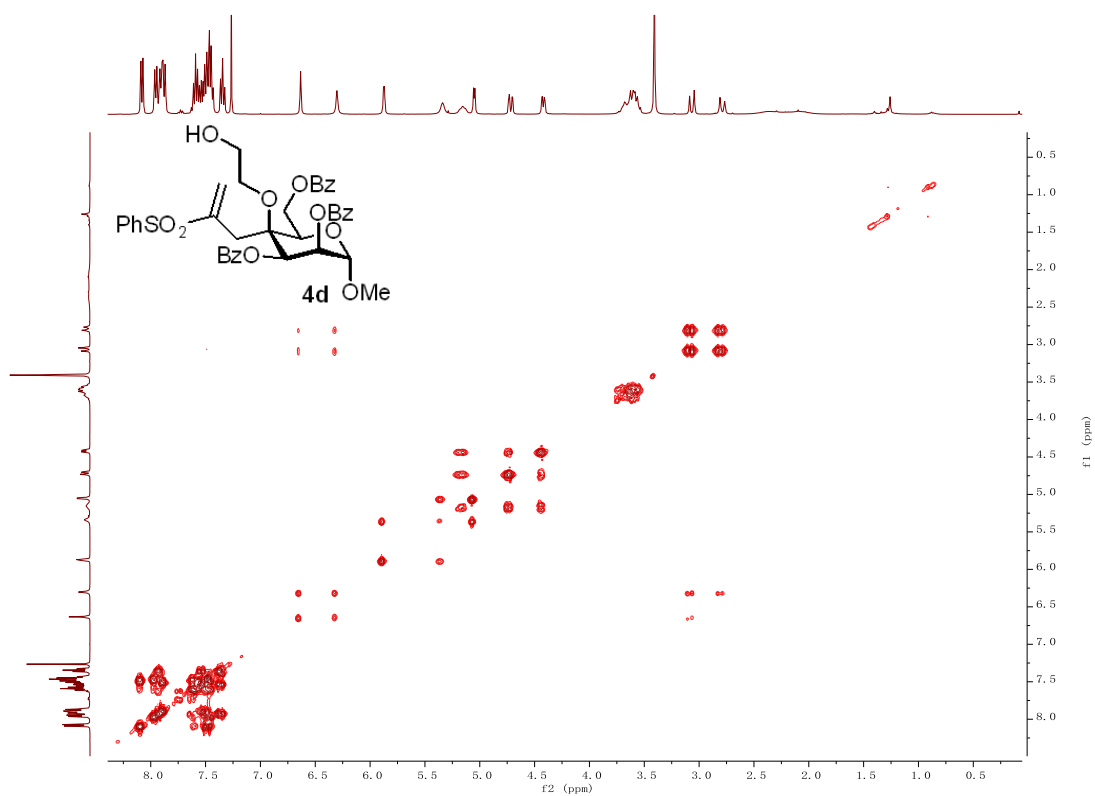

**COSY Spectra of compound 4d**

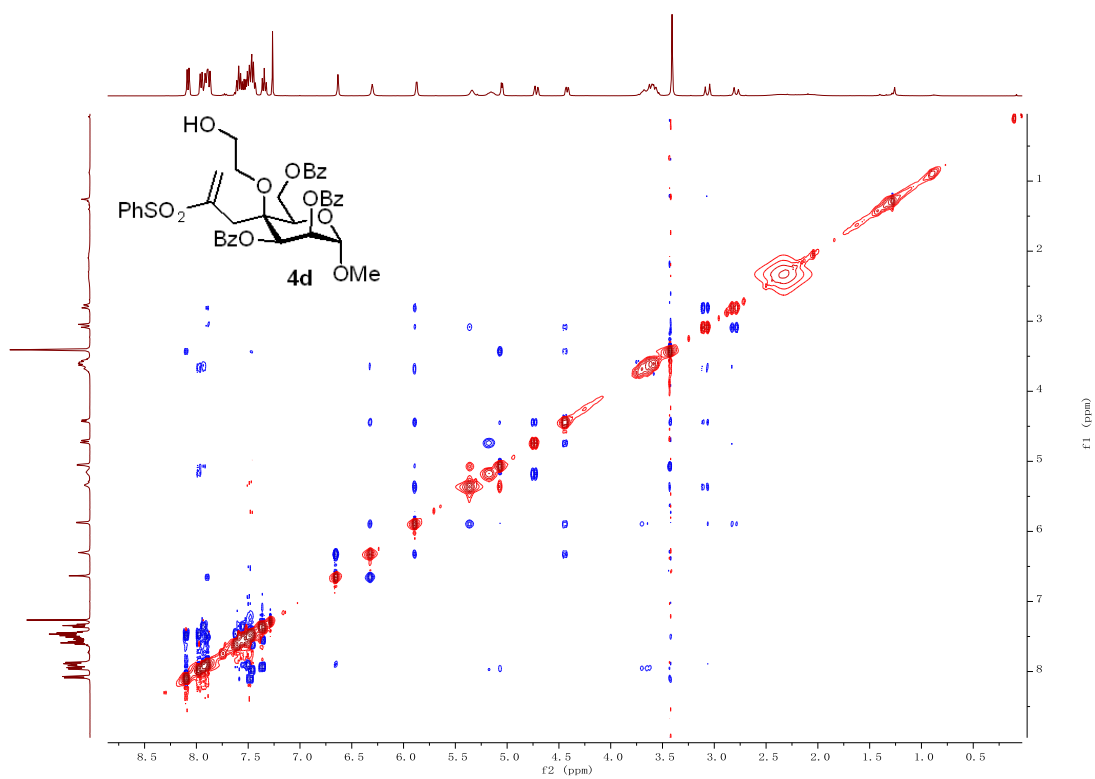

**NOESY Spectra of compound 4d**

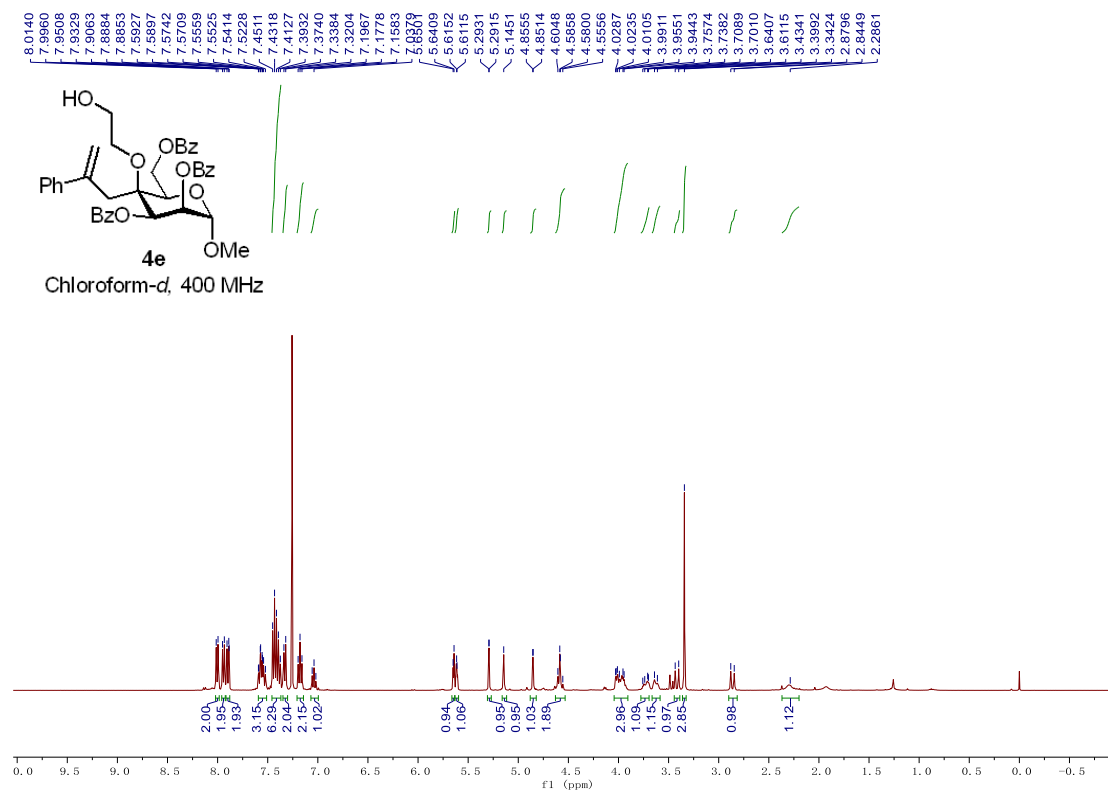

**<sup>1</sup>H NMR Spectra of compound 4e**

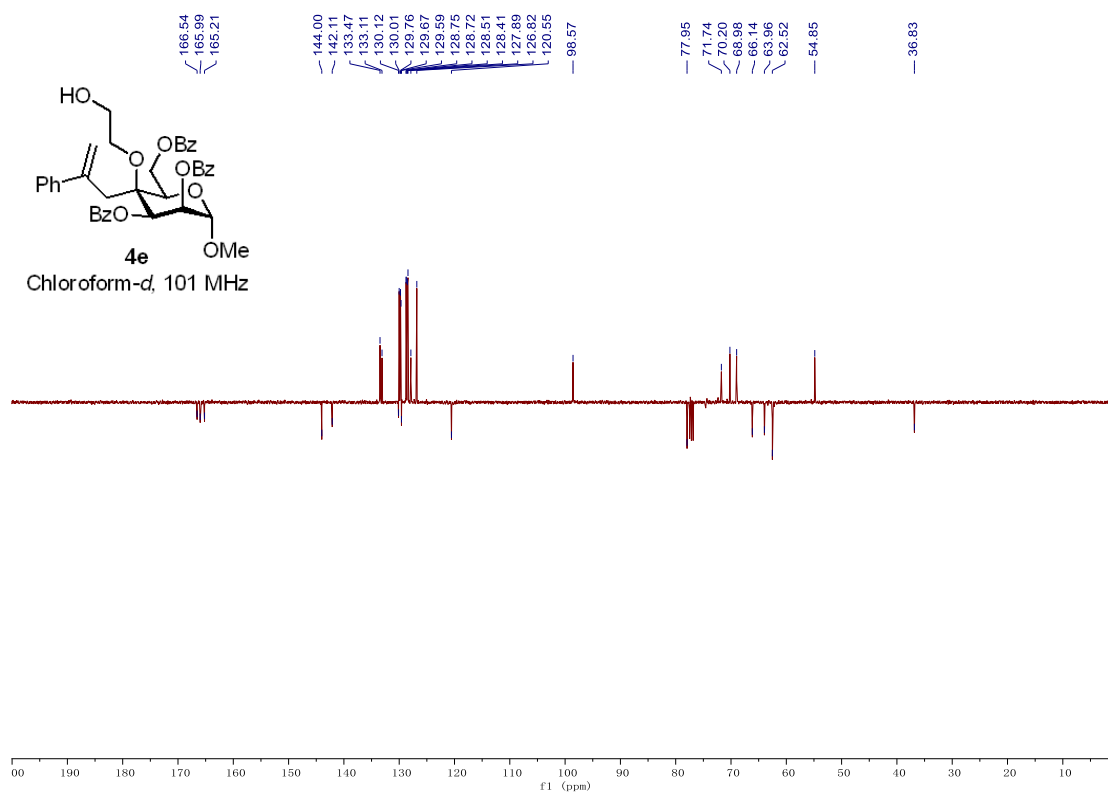

**<sup>13</sup>C NMR Spectra of compound 4e**

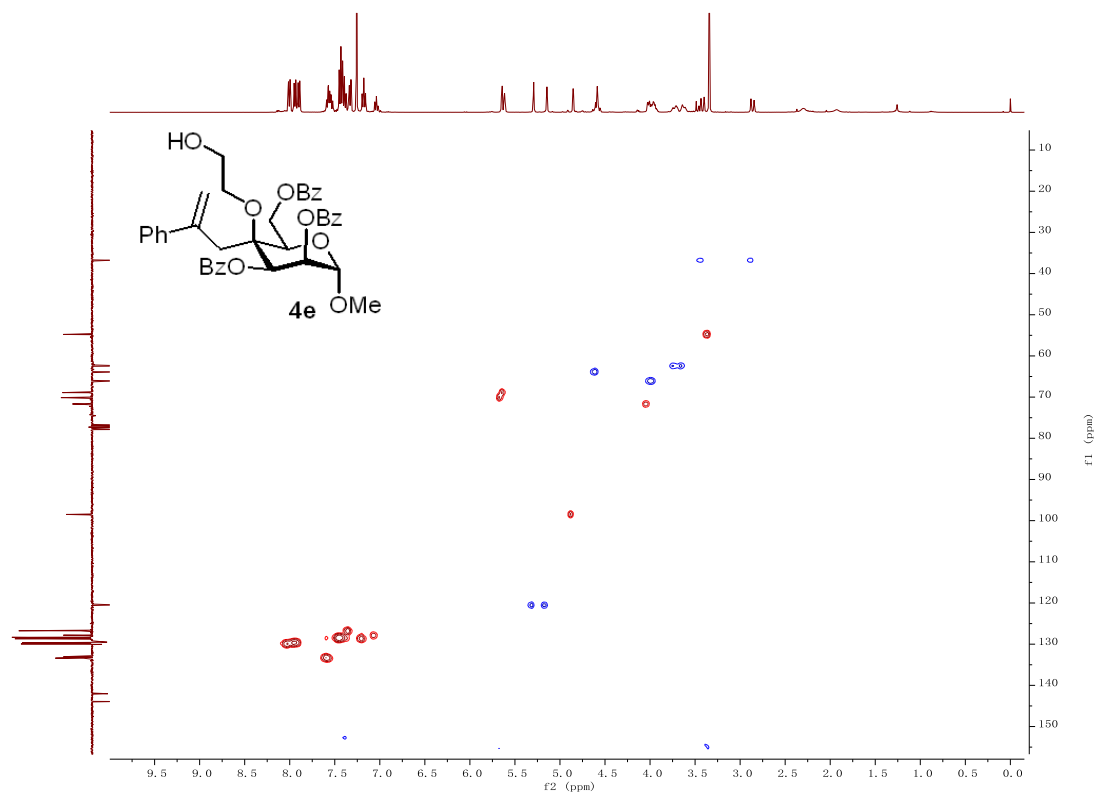

**HSQC Spectra of compound 4e**

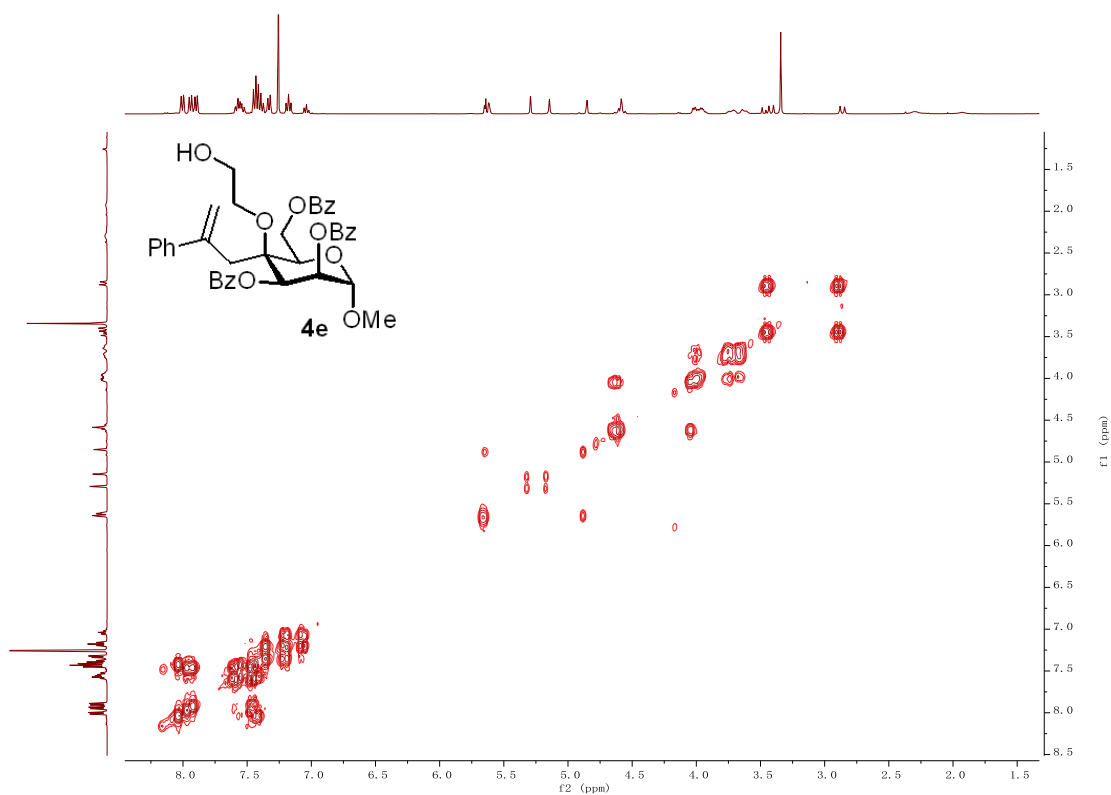

**COSY Spectra of compound 4e**

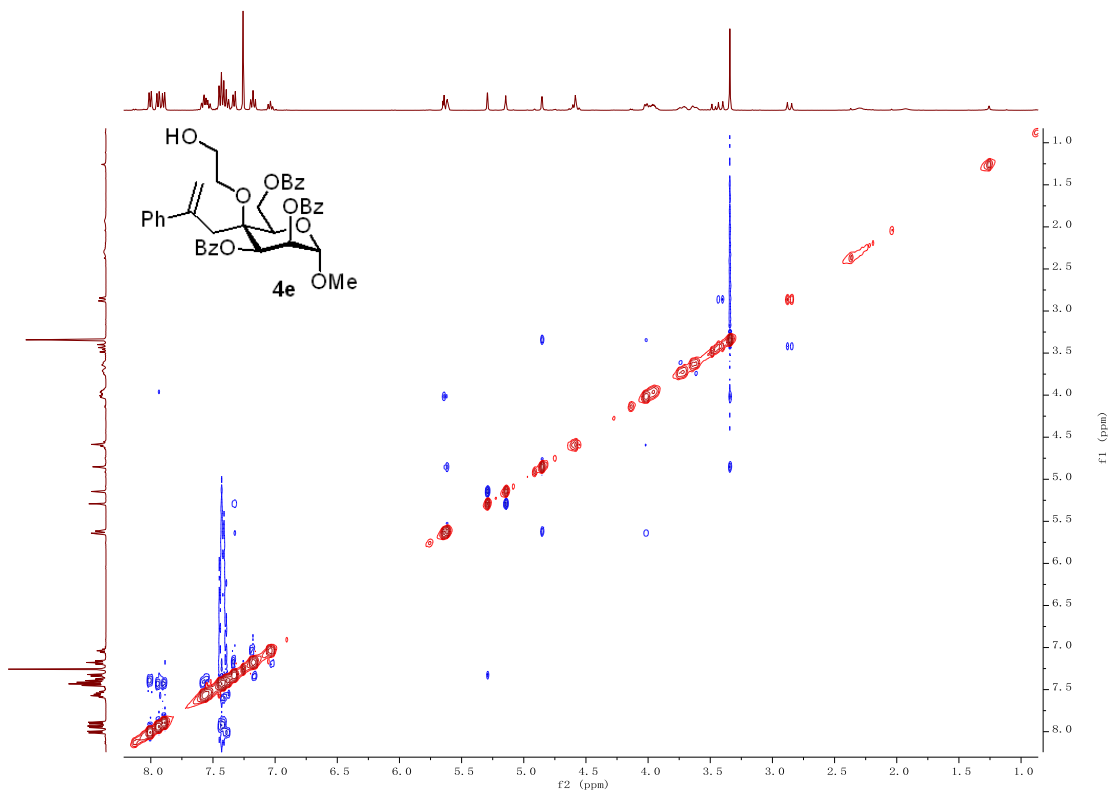

**NOESY Spectra of compound 4e**

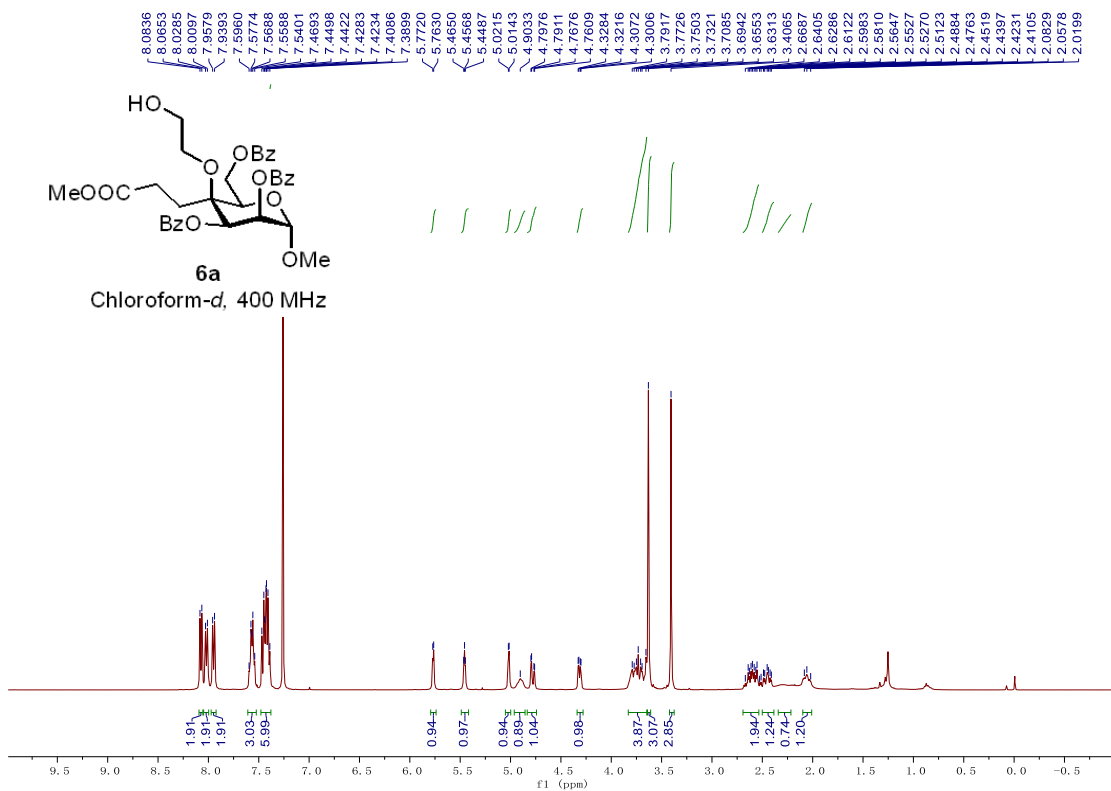

**<sup>1</sup>H NMR Spectra of compound 6a**

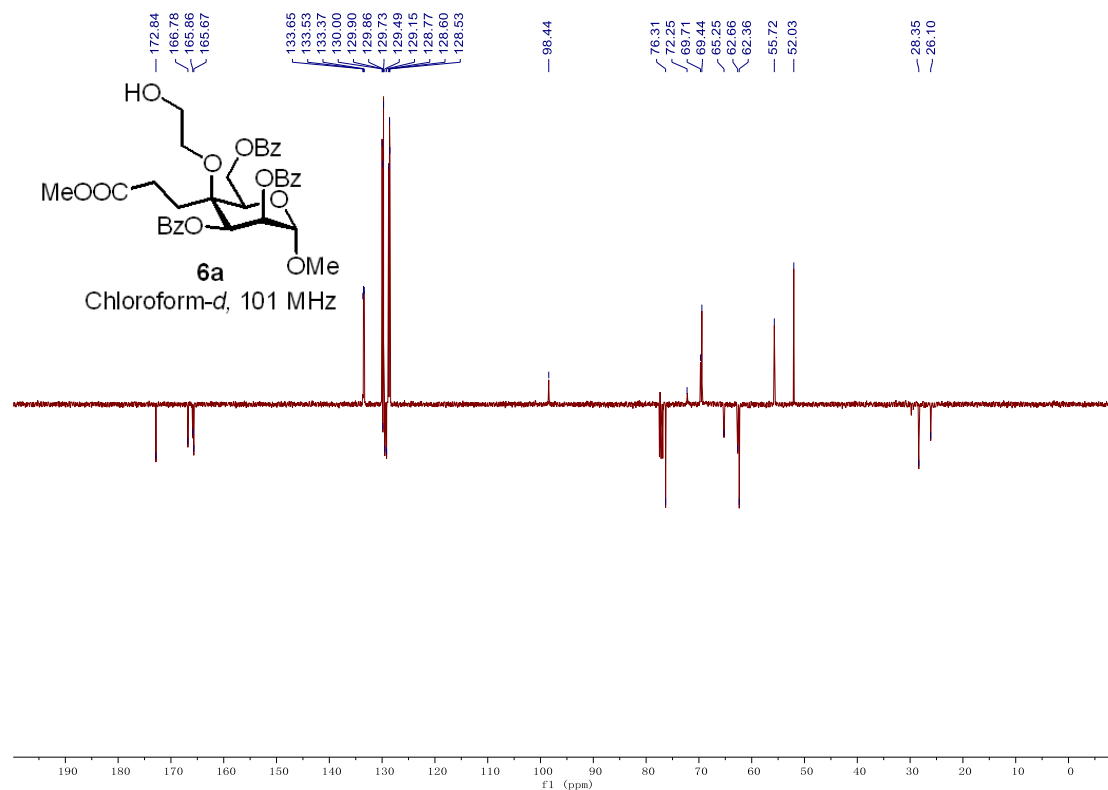

**<sup>13</sup>C NMR Spectra of compound 6a**

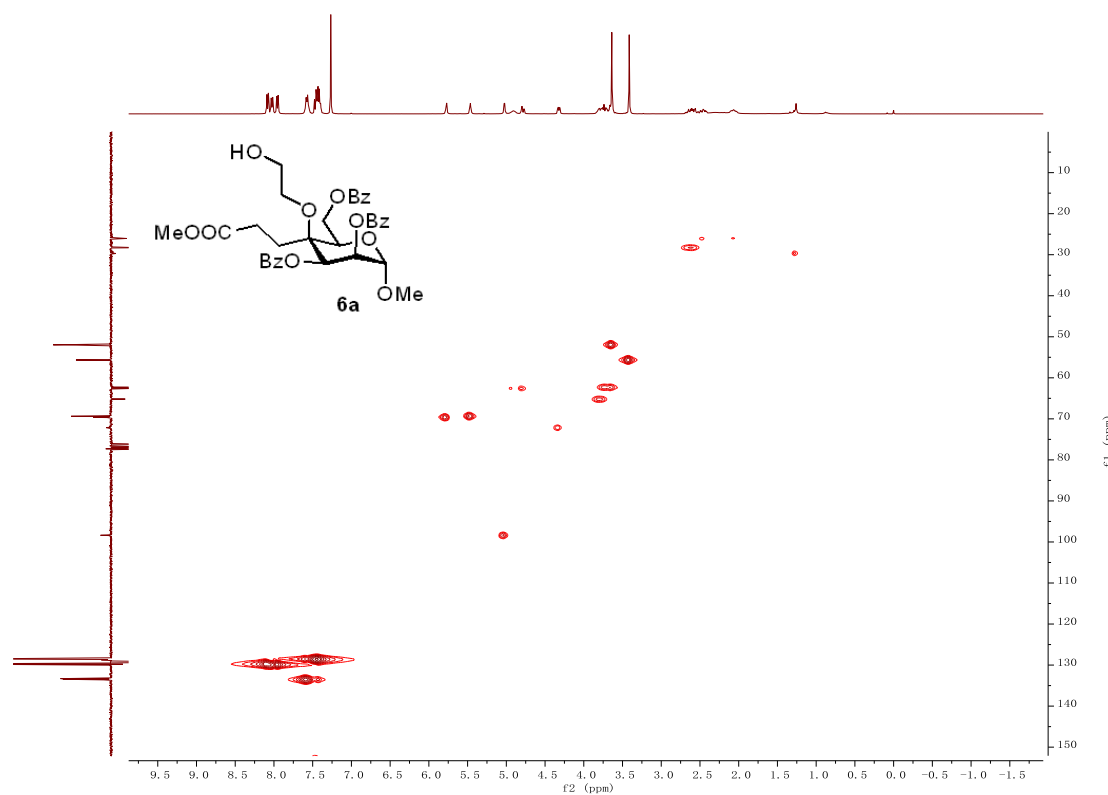

**HSQC Spectra of compound 6a**

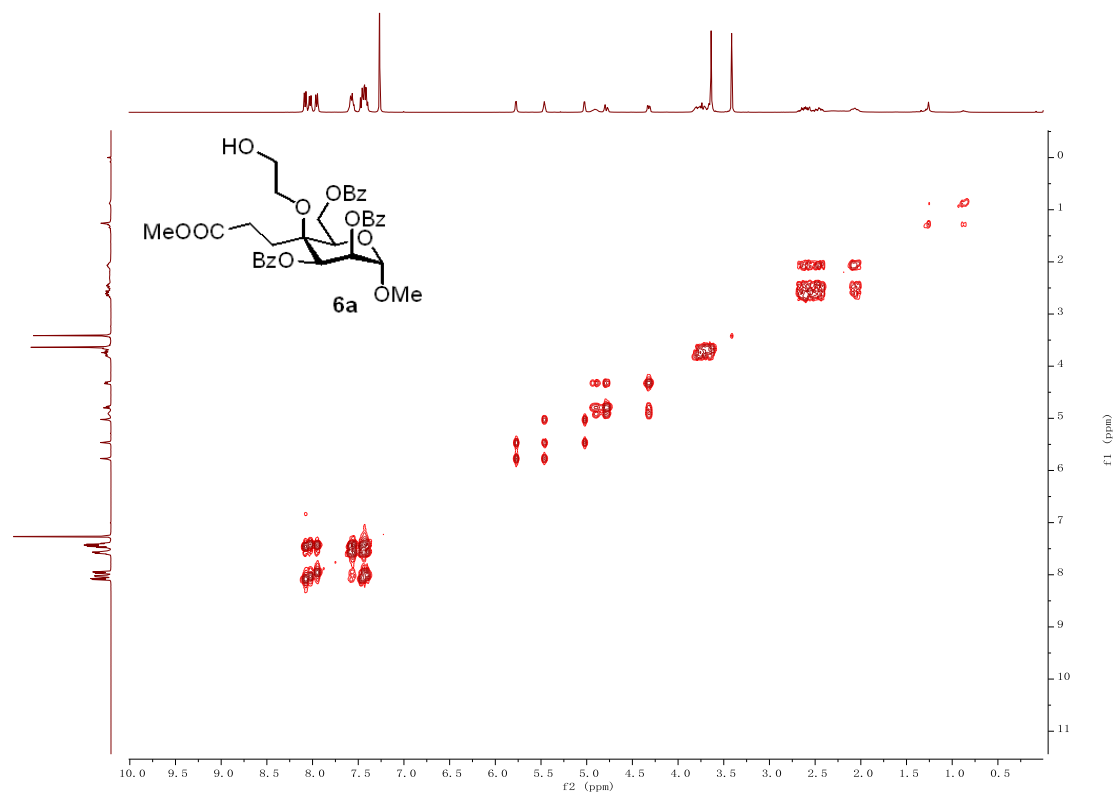

**COSY Spectra of compound 6a**

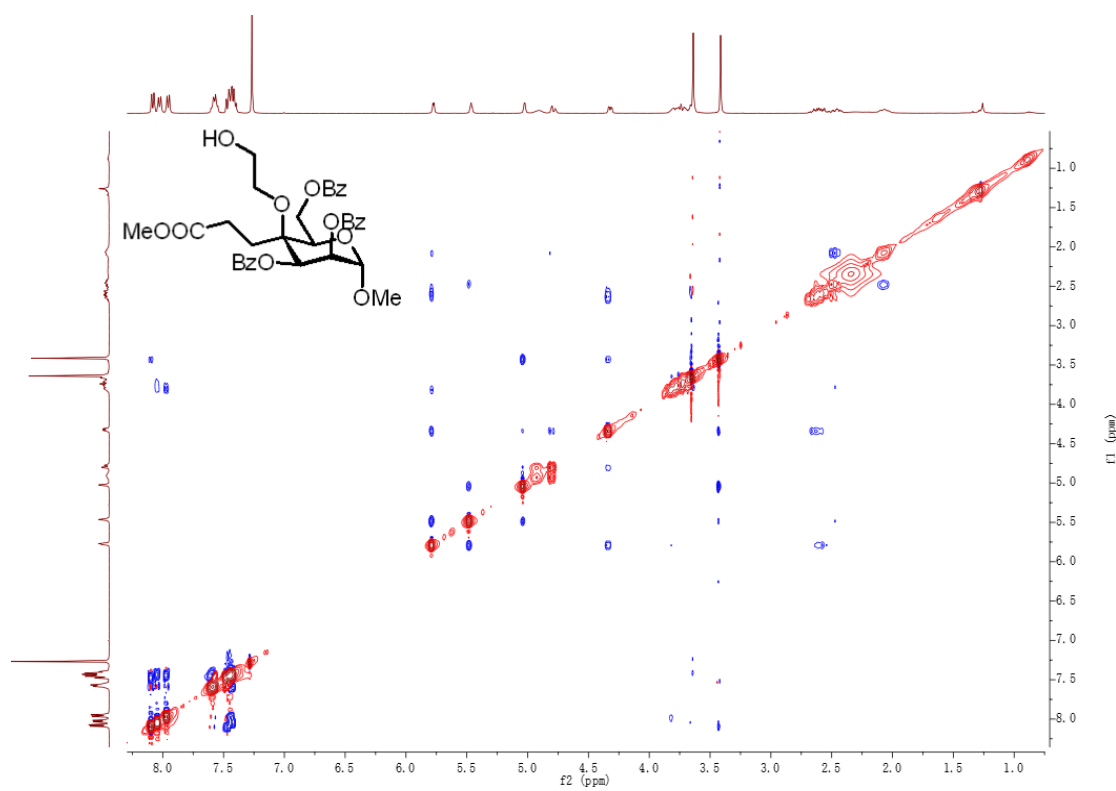

**NOESY Spectra of compound 6a**



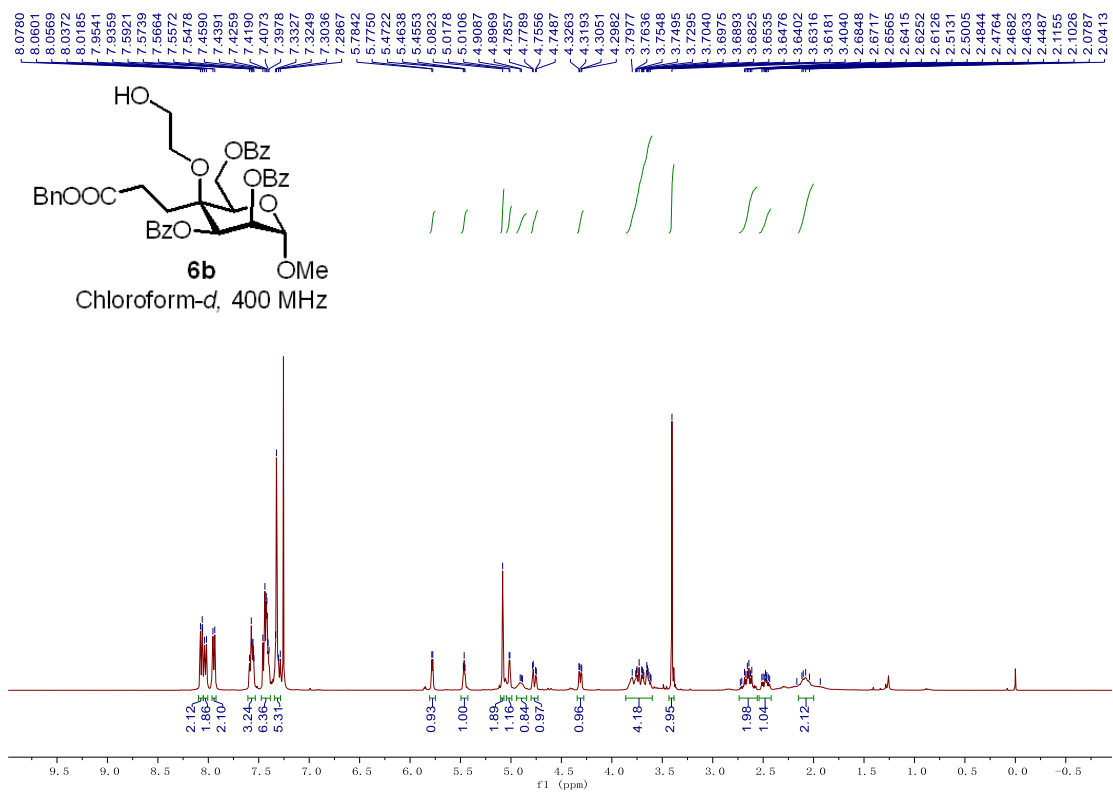

**<sup>1</sup>H NMR Spectra of compound 6b**

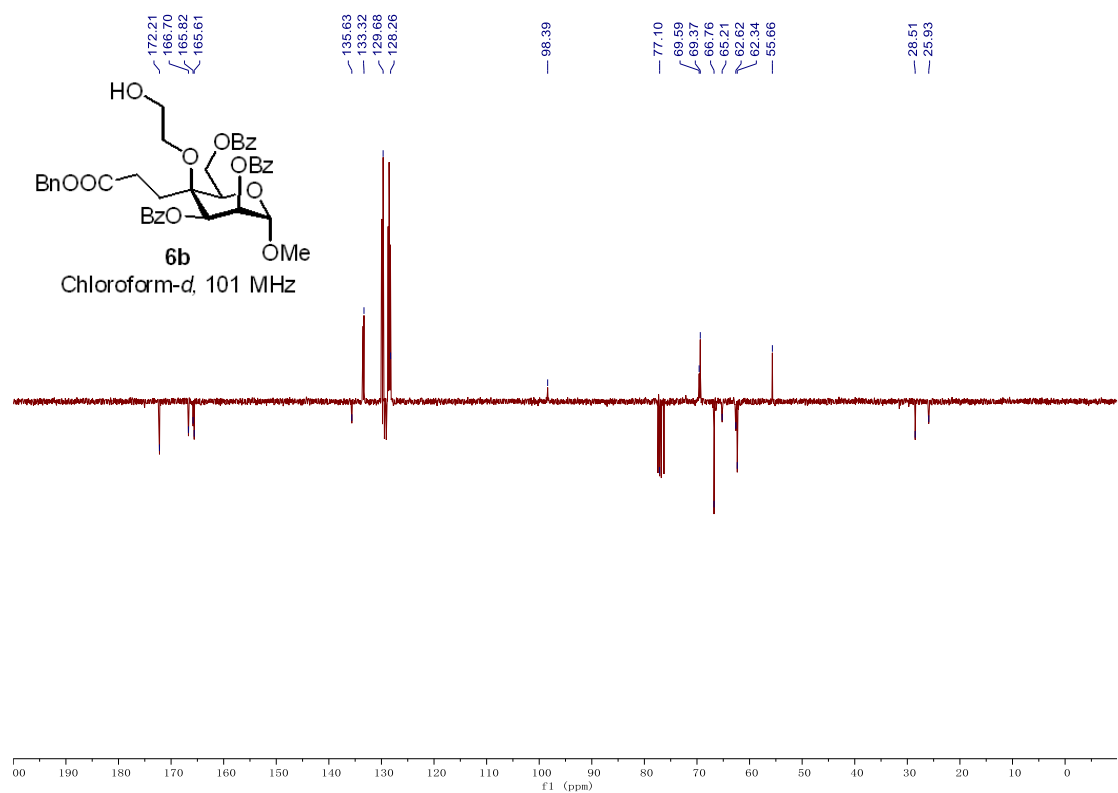

**<sup>13</sup>C NMR Spectra of compound 6b**

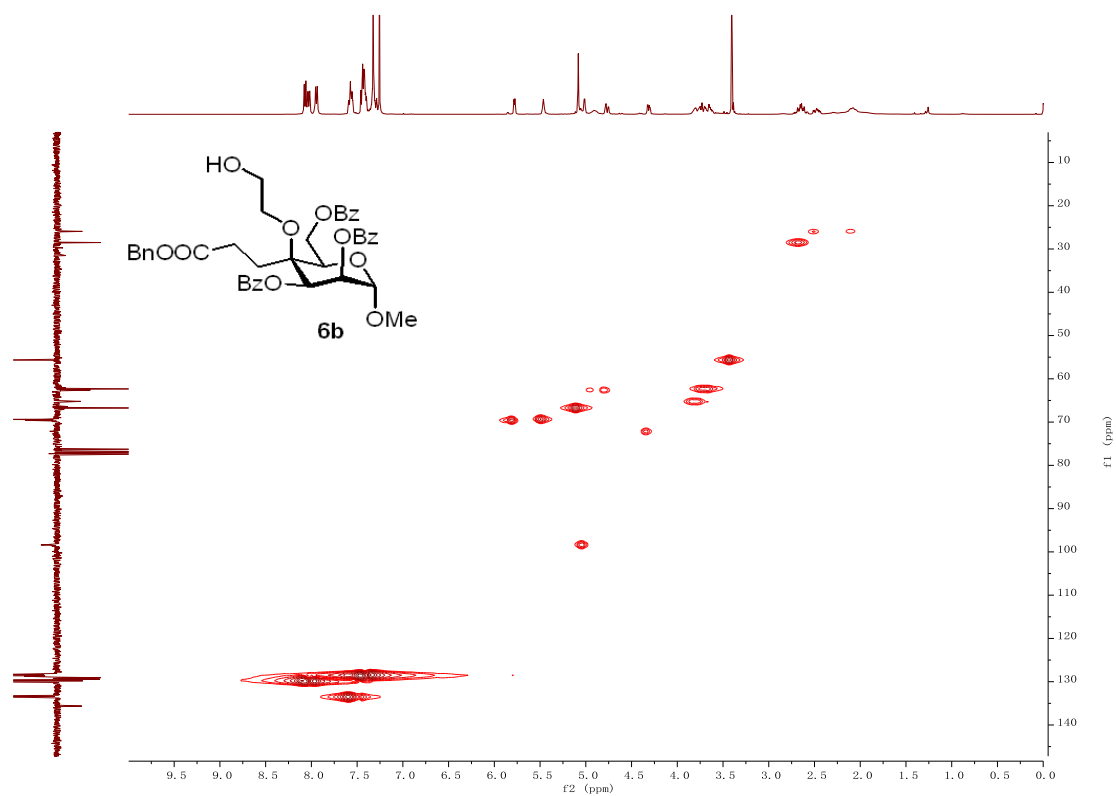

HSQC Spectra of compound 6b

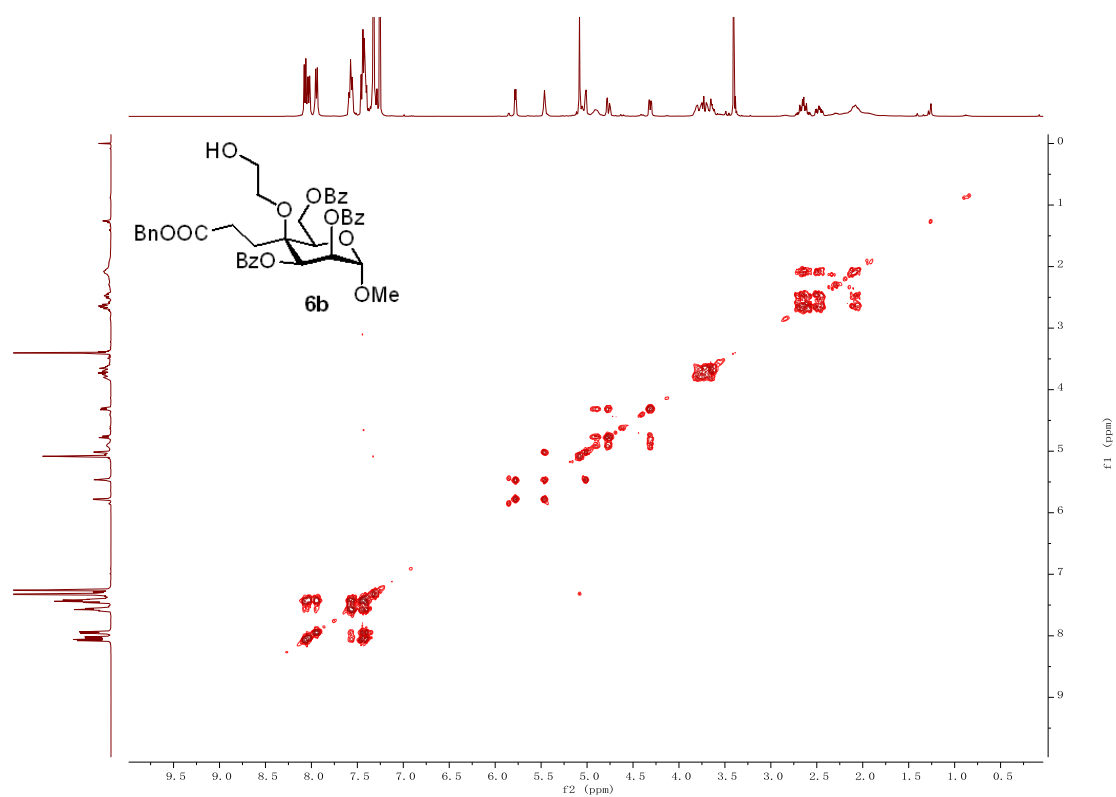

COSY Spectra of compound 6b

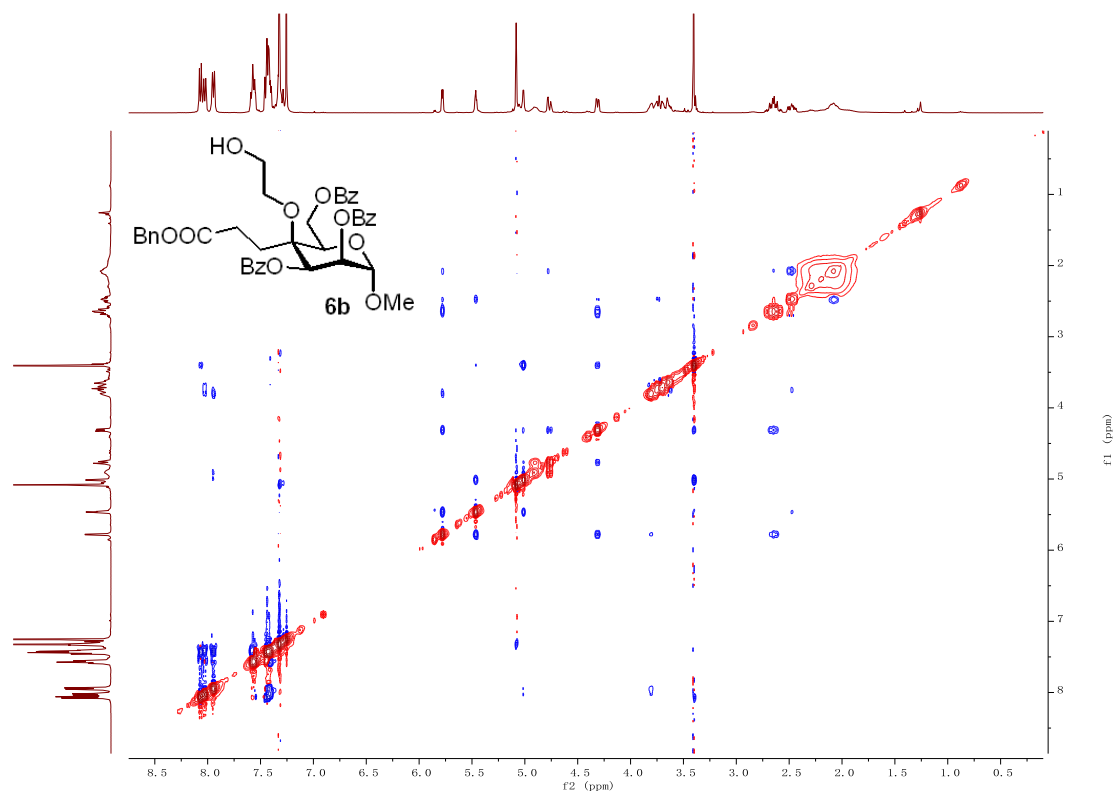

**NOESY Spectra of compound 6b**

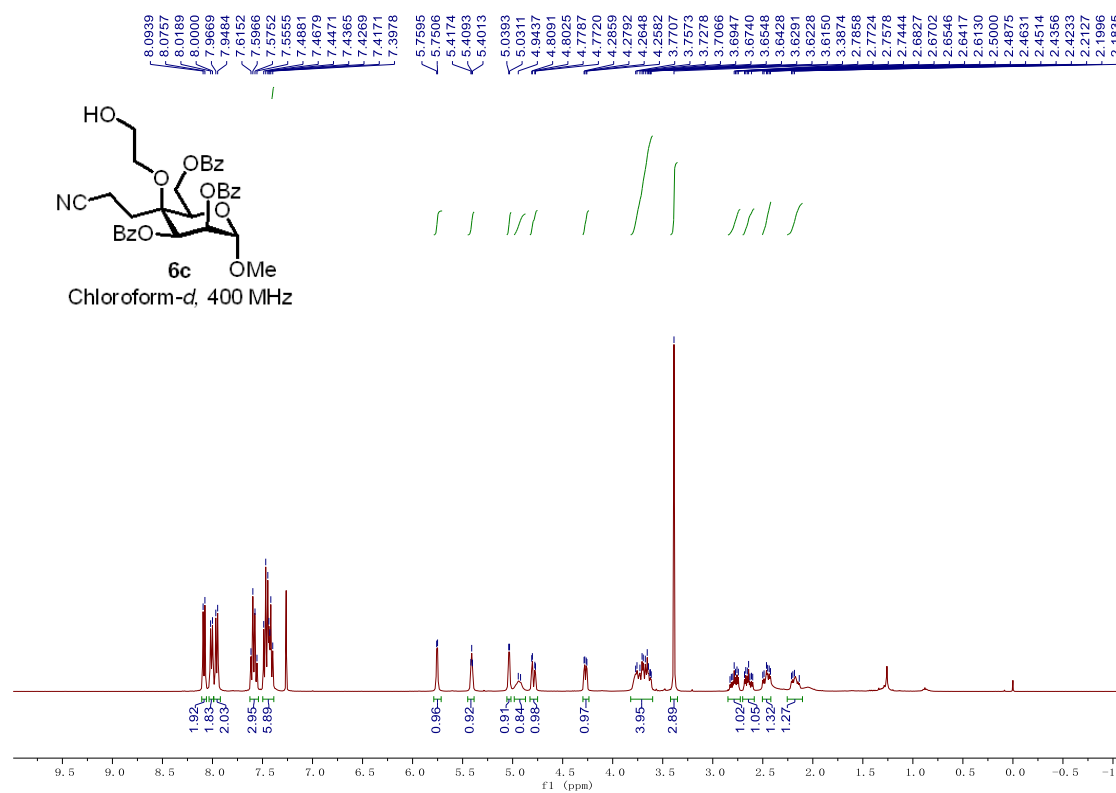

**<sup>1</sup>H NMR Spectra of compound 6c**

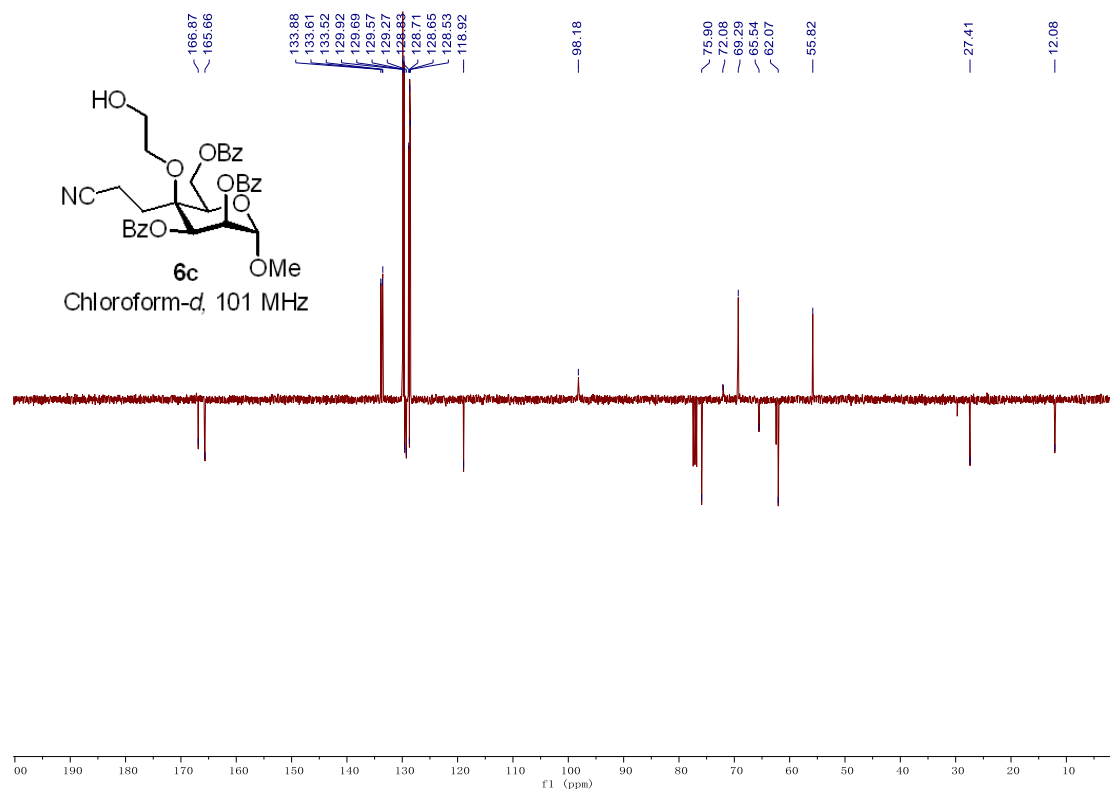

**<sup>13</sup>C NMR Spectra of compound 6c**

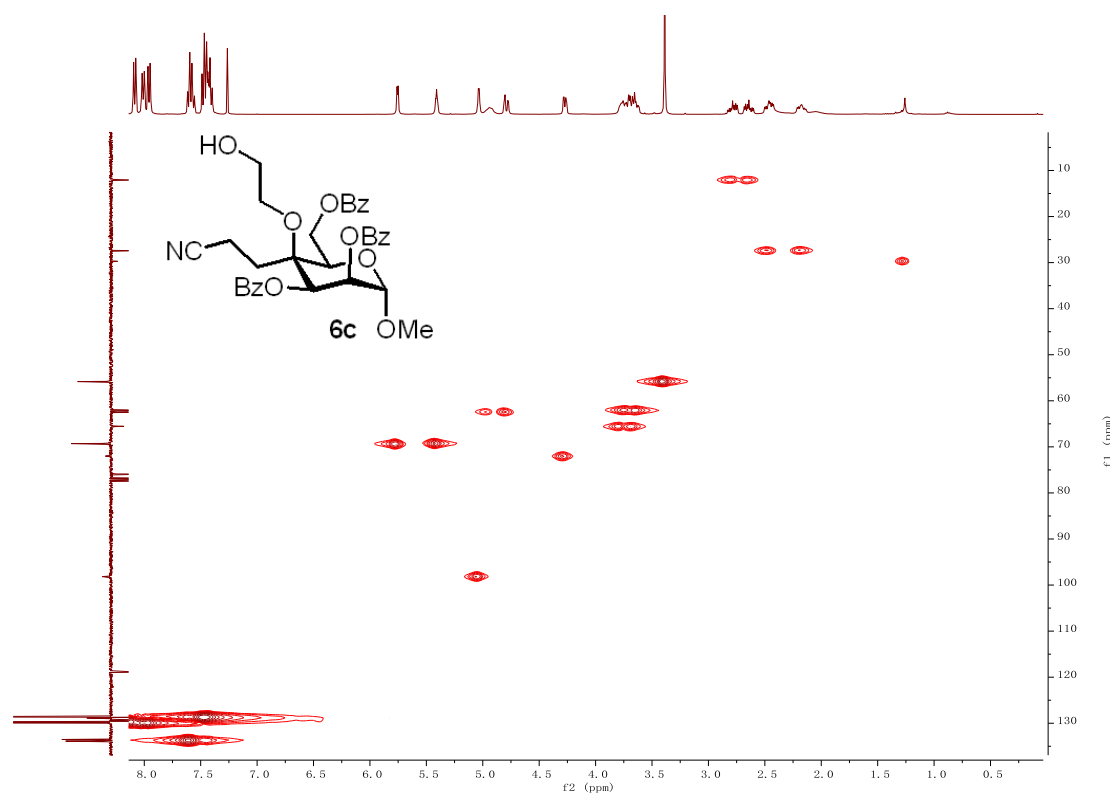

**HSQC Spectra of compound 6c**

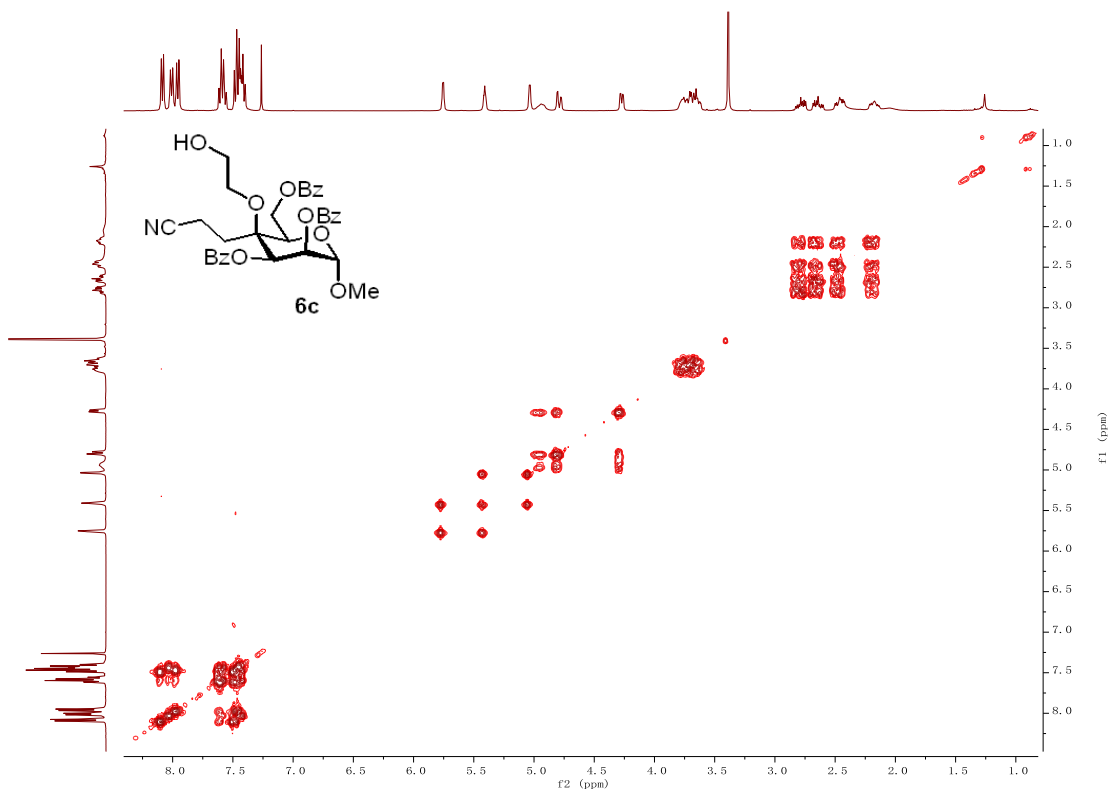

**COSY Spectra of compound 6c**

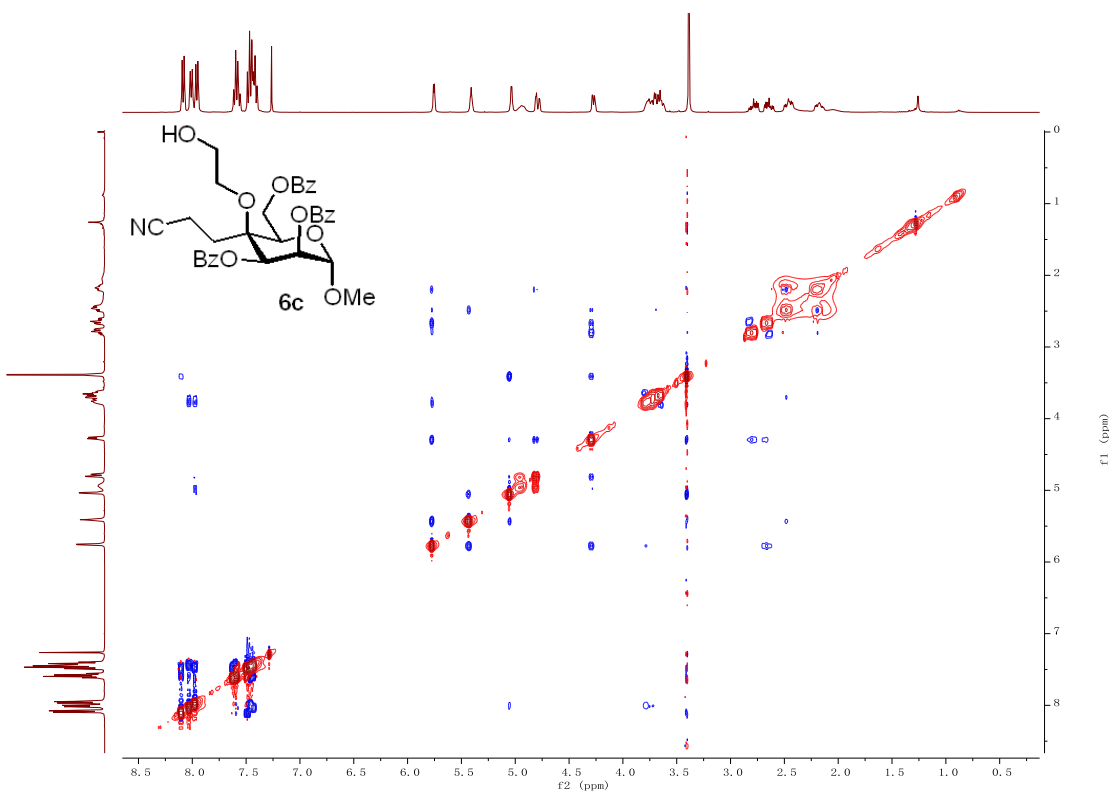

**NOESY Spectra of compound 6c**

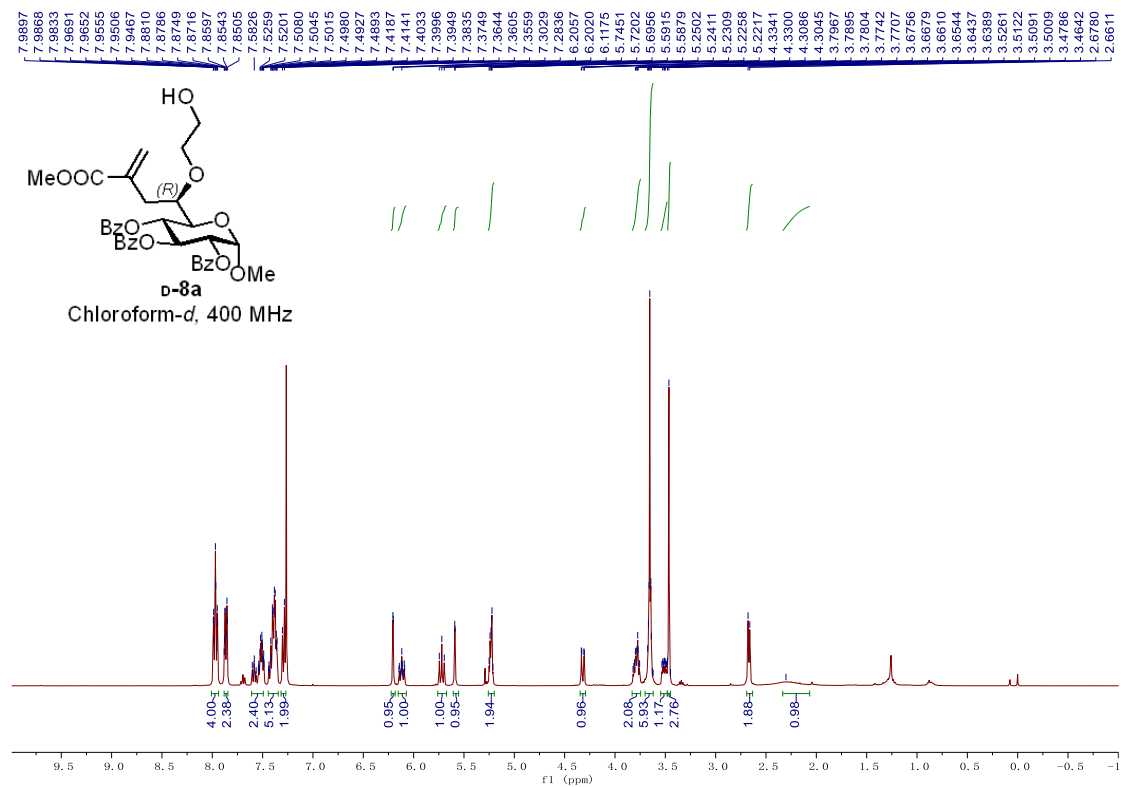

**<sup>1</sup>H NMR Spectra of compound d-8a**

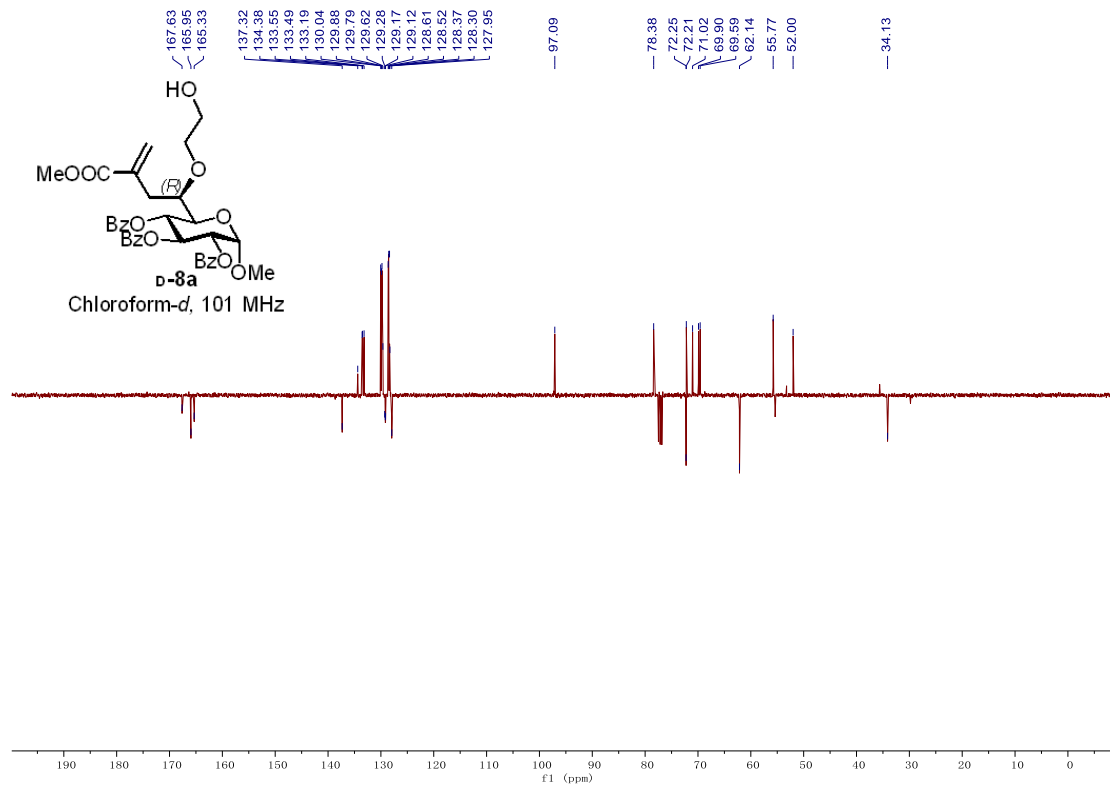

**<sup>13</sup>C NMR Spectra of compound d-8a**

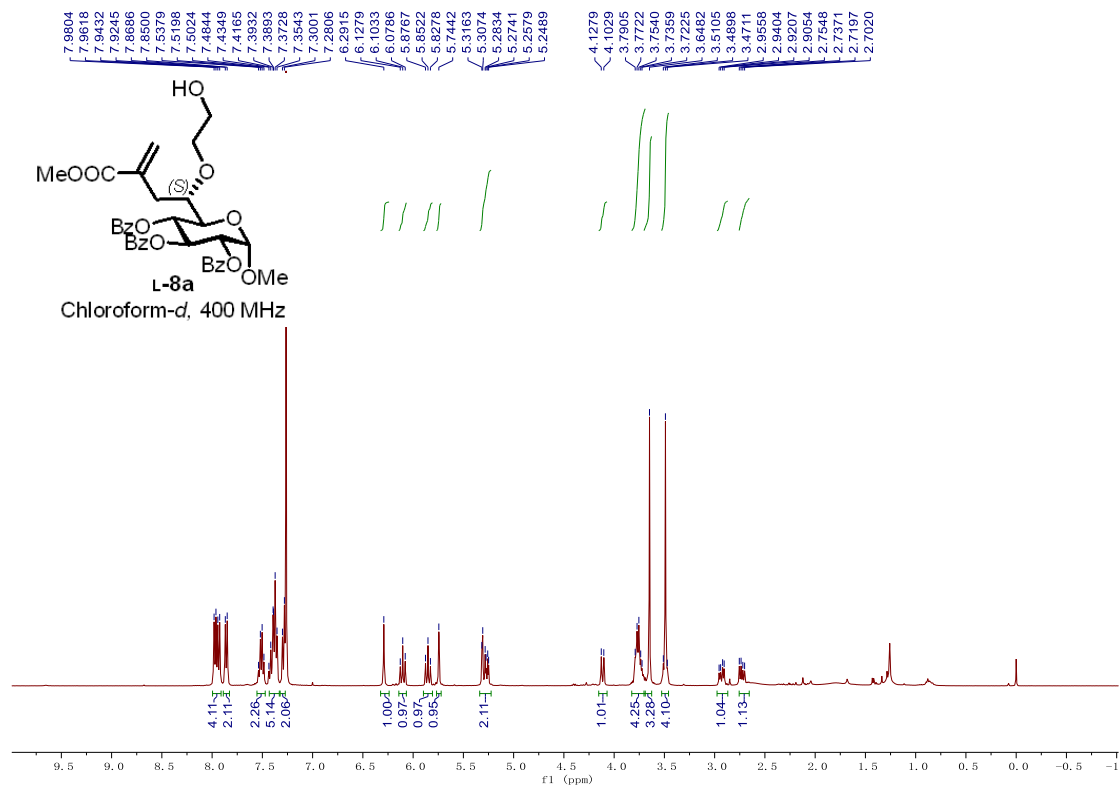

**<sup>1</sup>H NMR Spectra of compound L-8a**

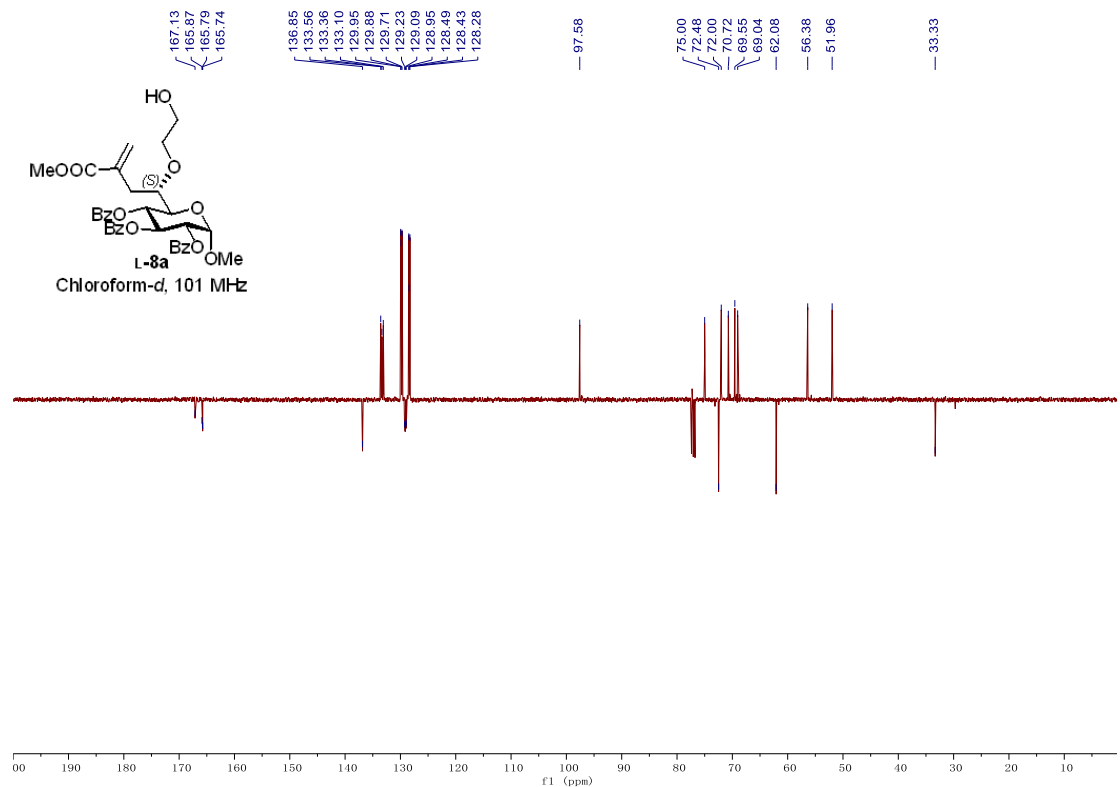

**<sup>13</sup>C NMR Spectra of compound L-8a**

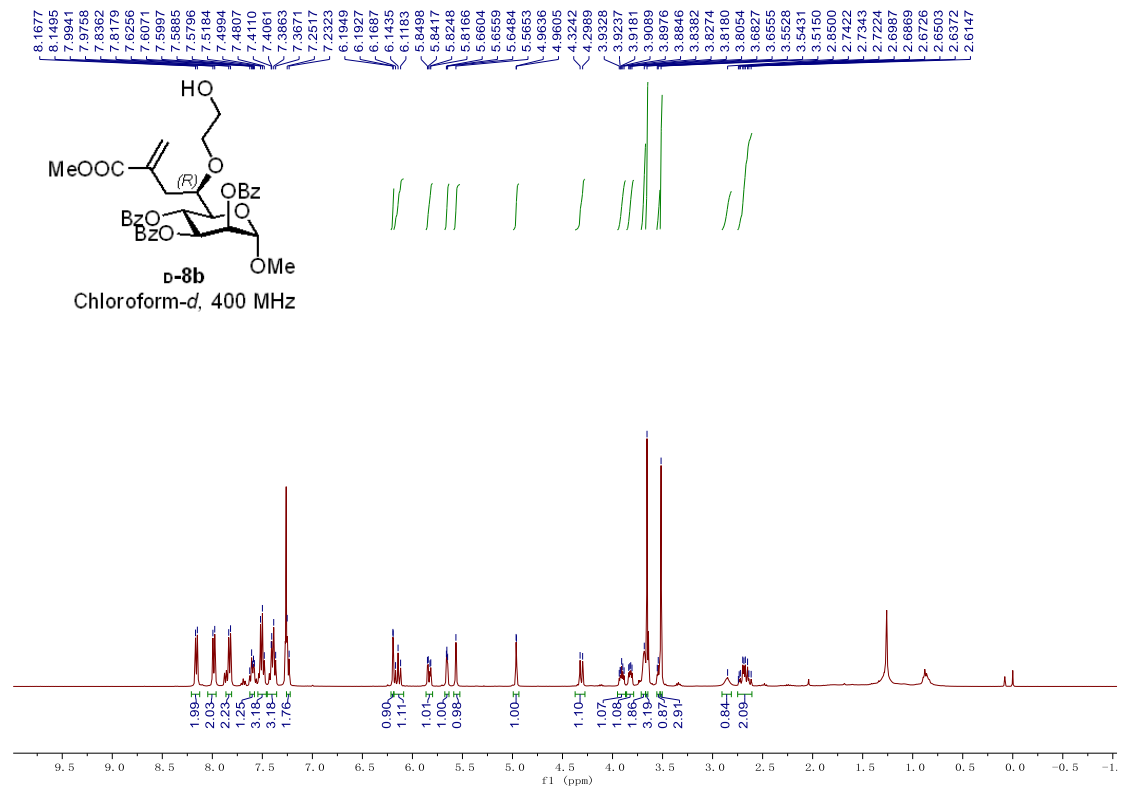

**<sup>1</sup>H NMR Spectra of compound d-8b**

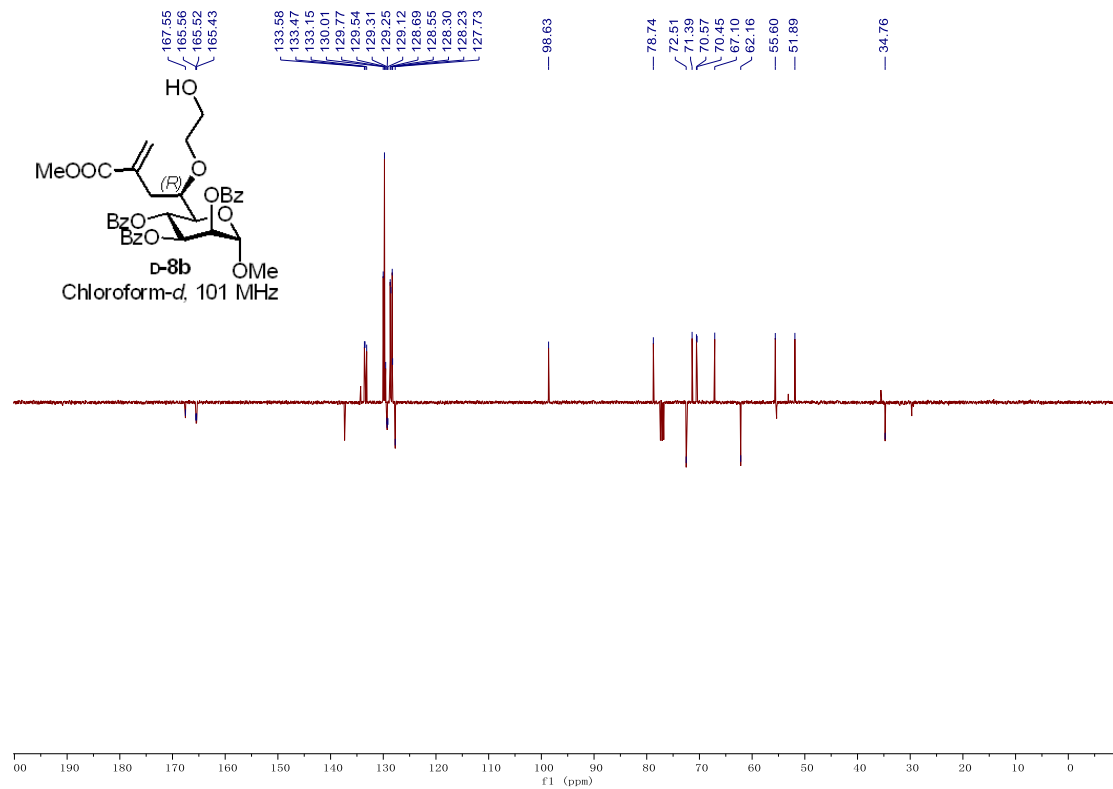

**<sup>13</sup>C NMR Spectra of compound d-8b**



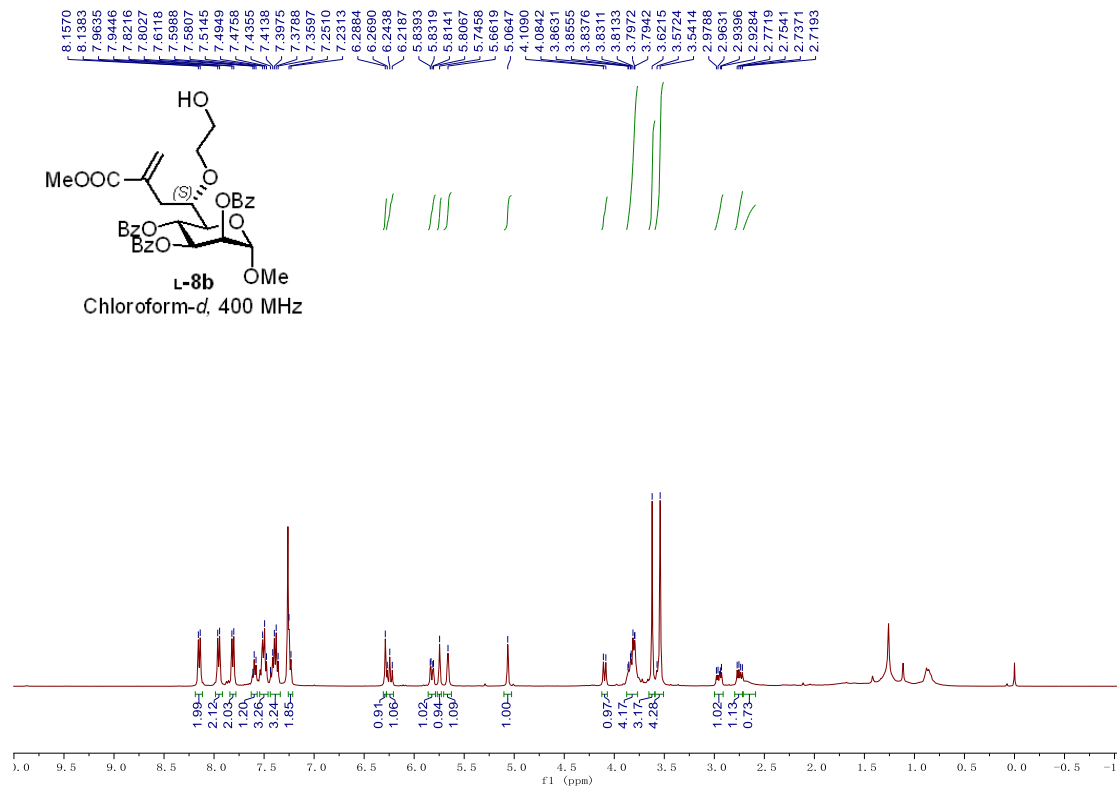

**<sup>1</sup>H NMR Spectra of compound L-8b**

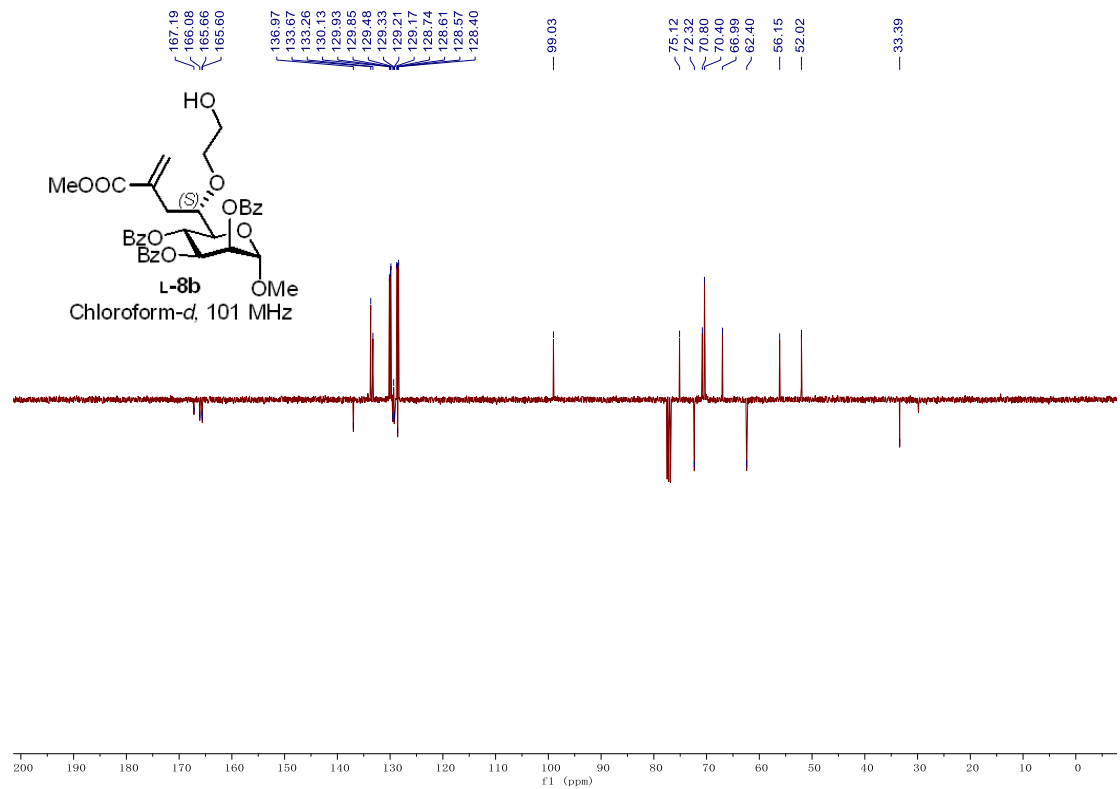

**<sup>13</sup>C NMR Spectra of compound L-8b**

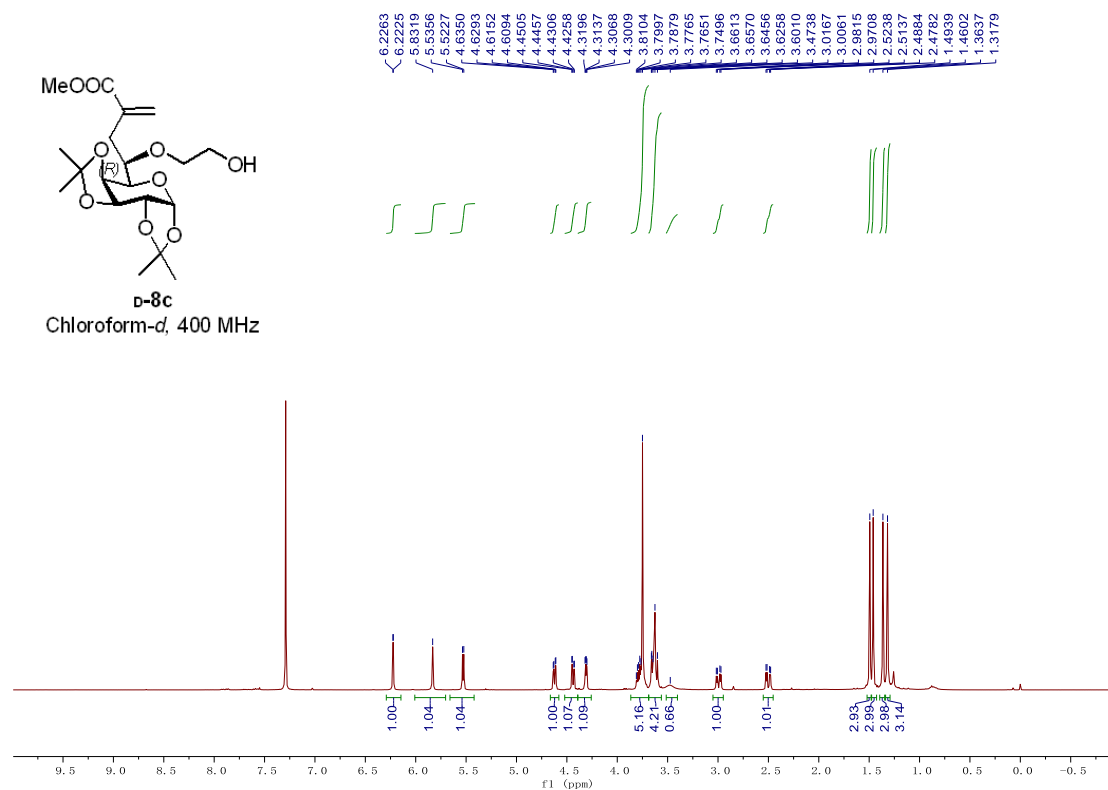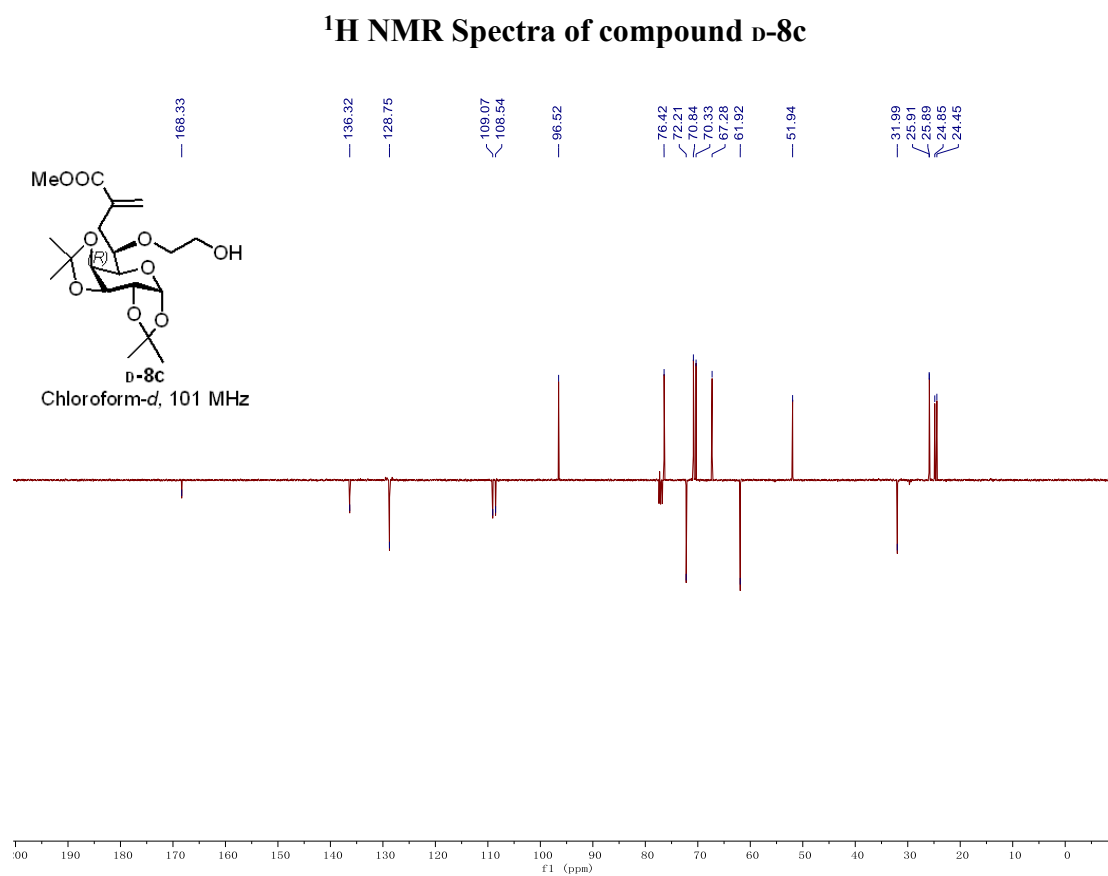

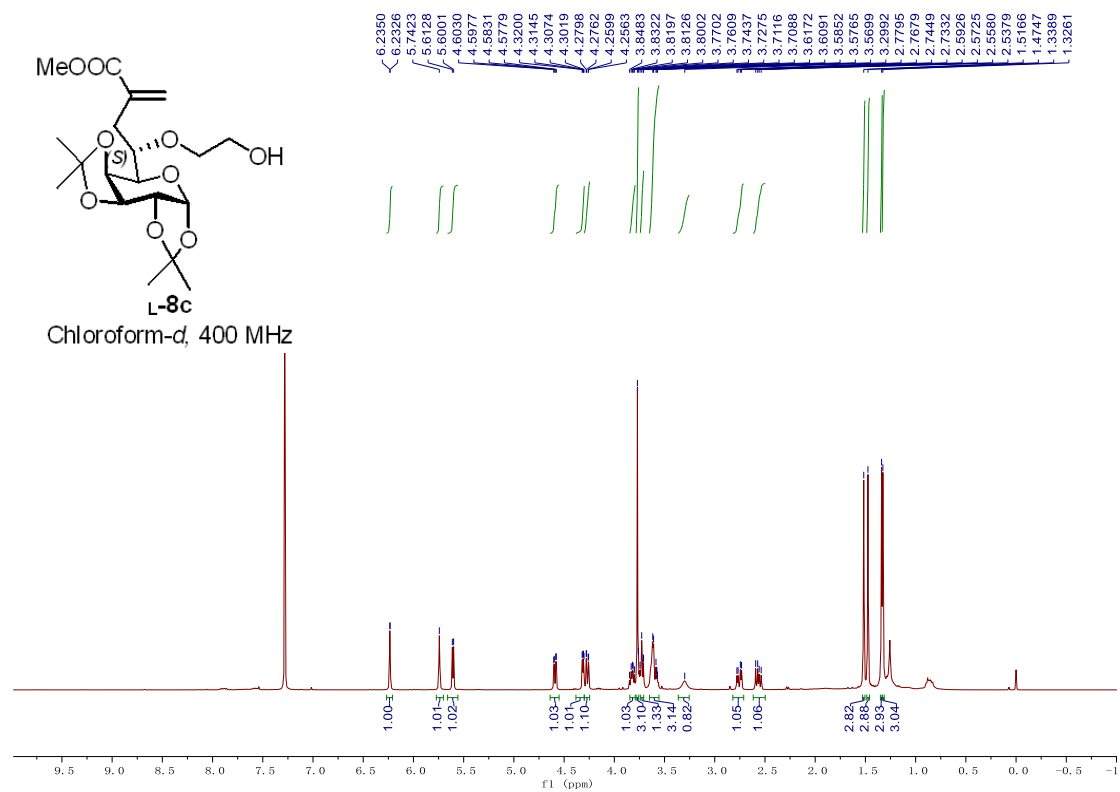

### $^1\text{H}$ NMR Spectra of compound **L-8c**

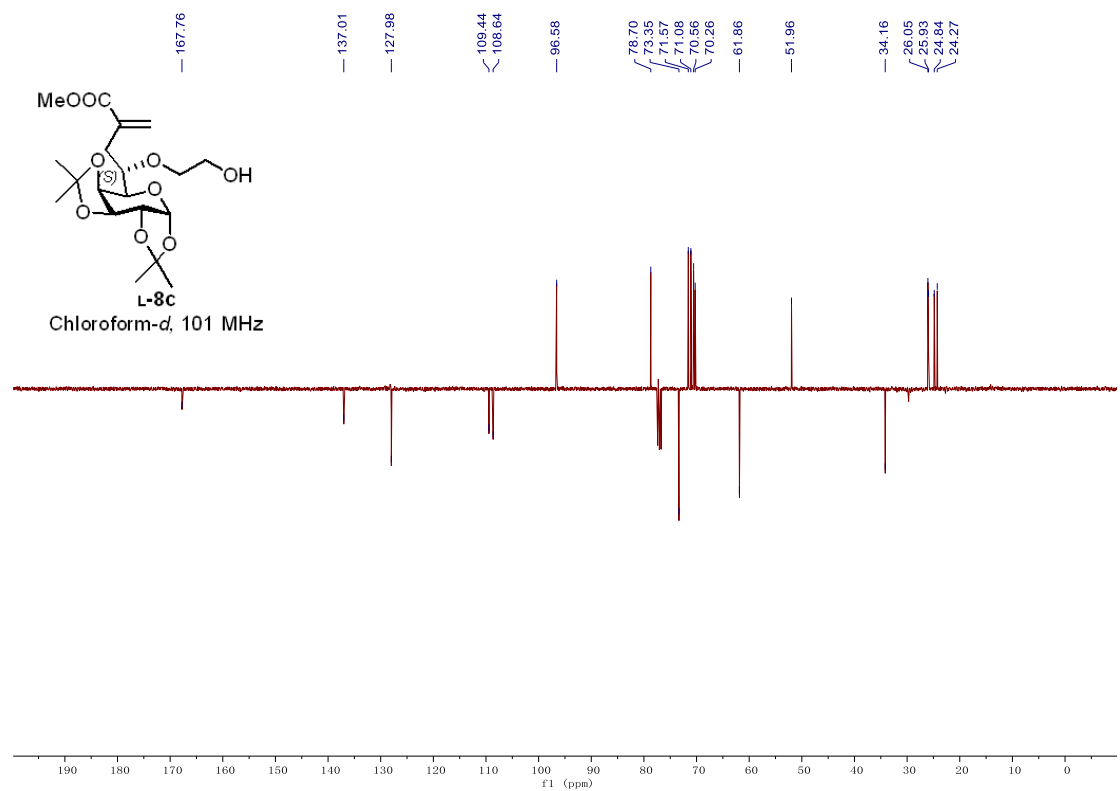

### $^{13}\text{C}$ NMR Spectra of compound **L-8c**

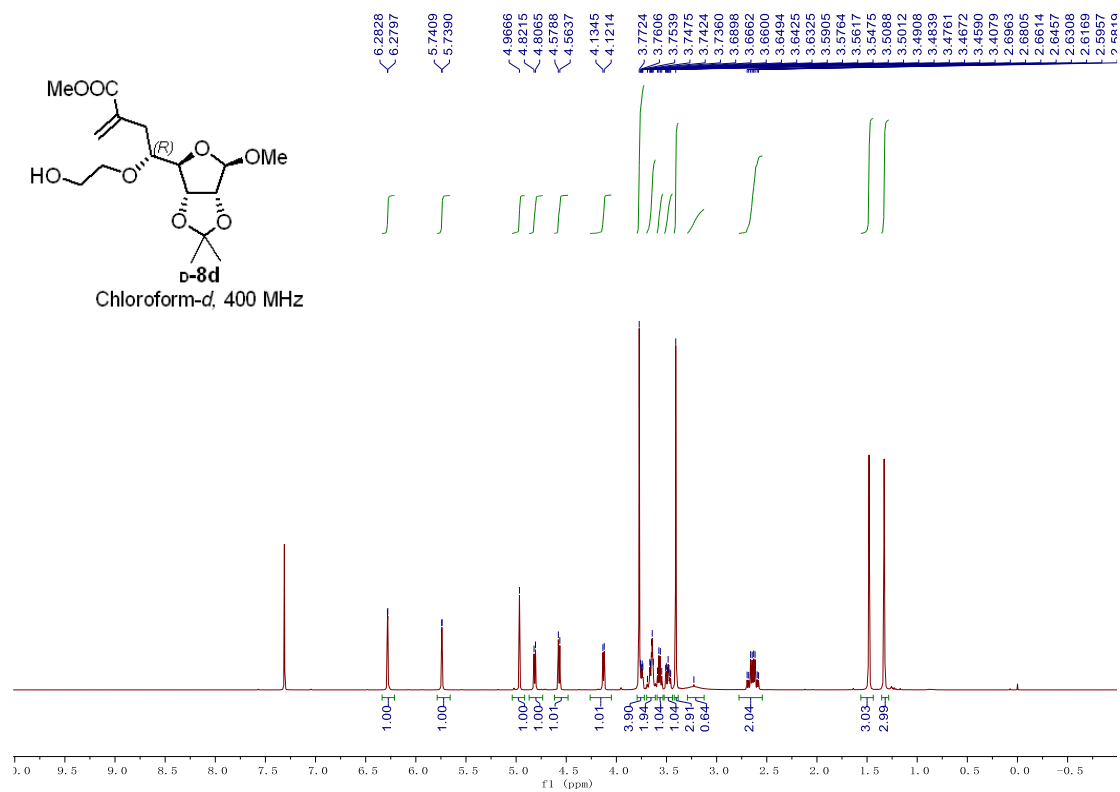

### <sup>1</sup>H NMR Spectra of compound d-8d

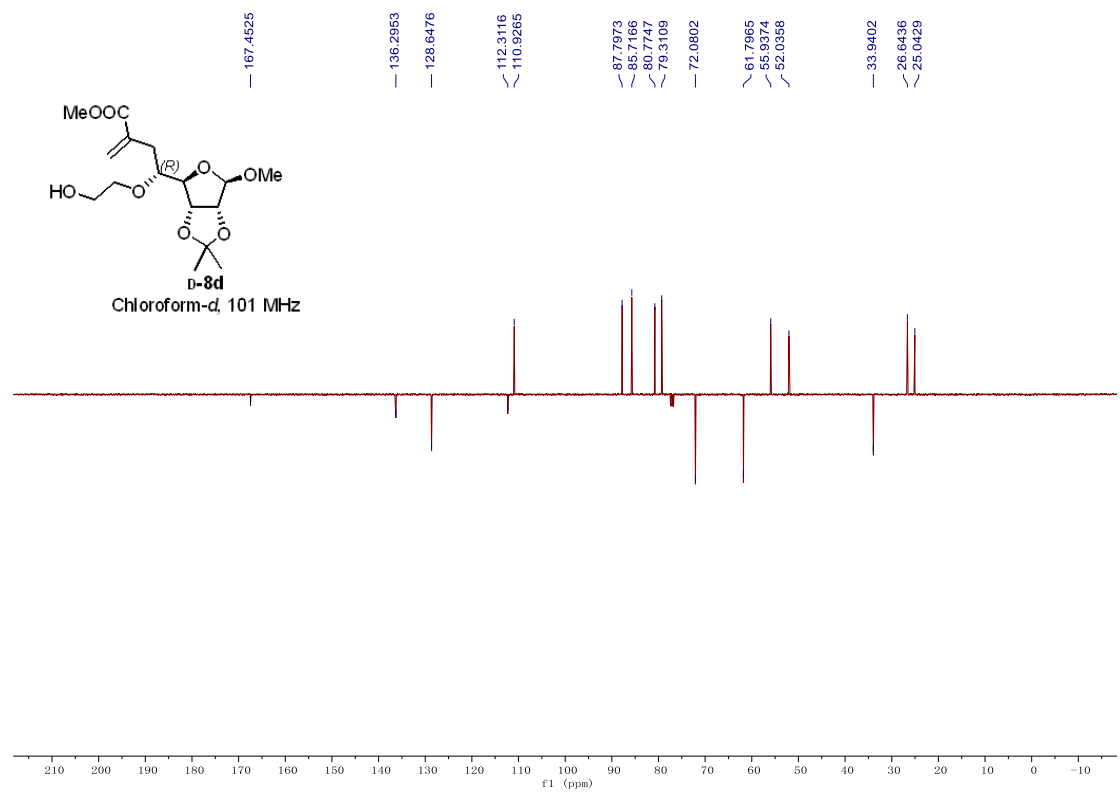

### <sup>13</sup>C NMR Spectra of compound d-8d

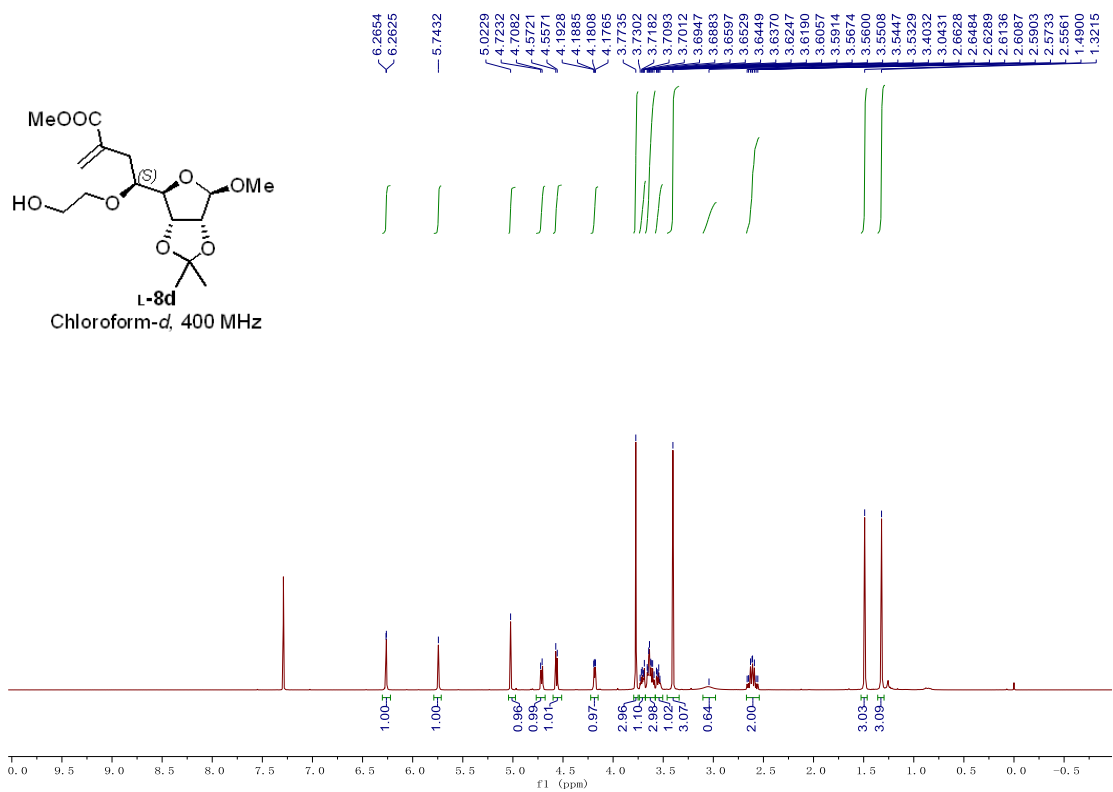

### <sup>1</sup>H NMR Spectra of compound L-8d

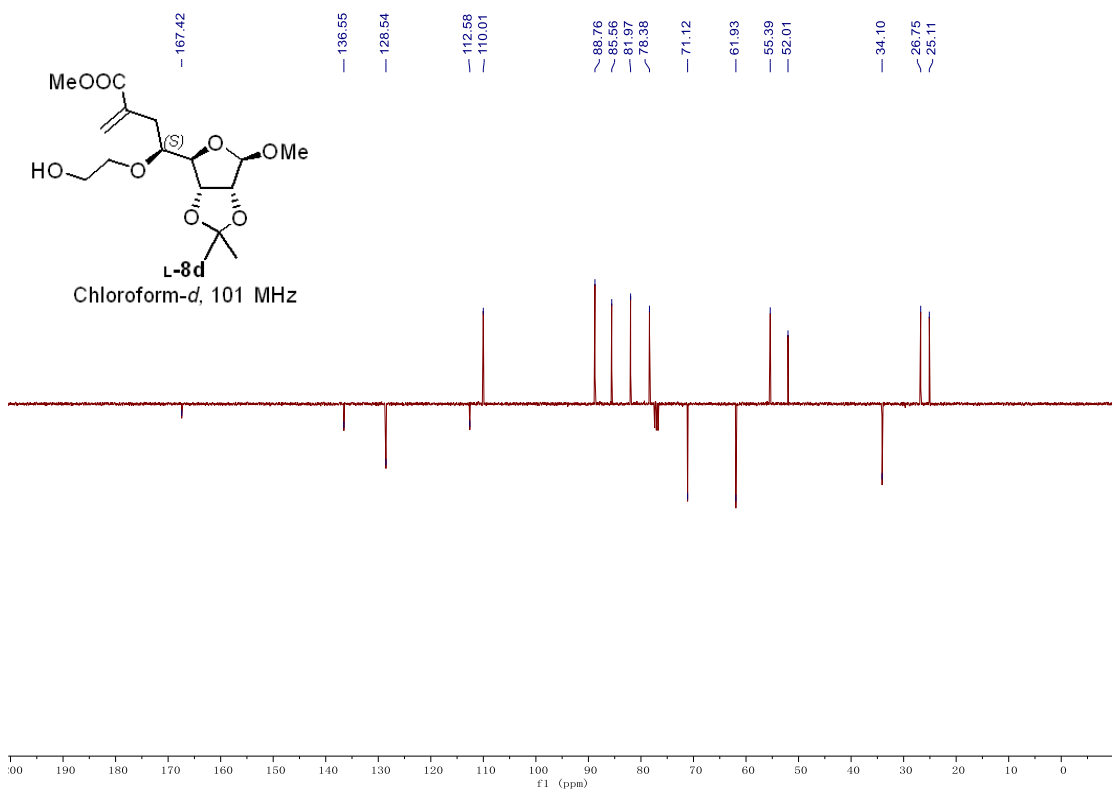

### <sup>13</sup>C NMR Spectra of compound L-8d

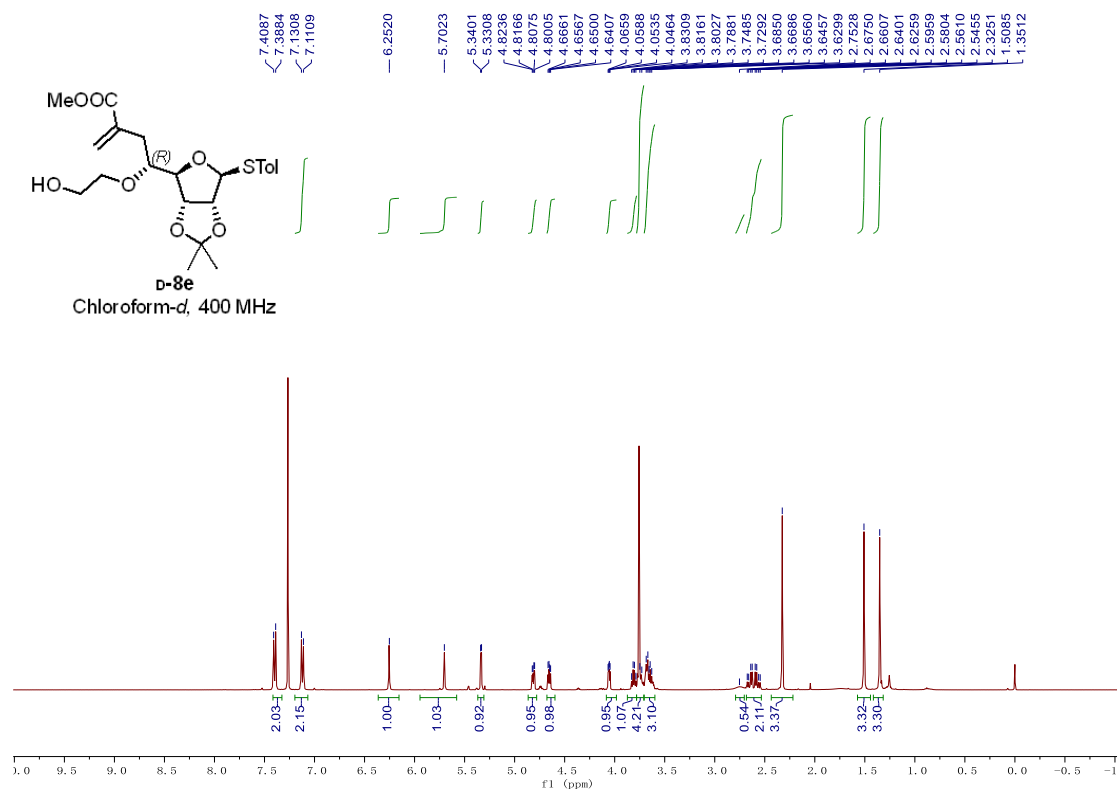

### <sup>1</sup>H NMR Spectra of compound **d-8e**

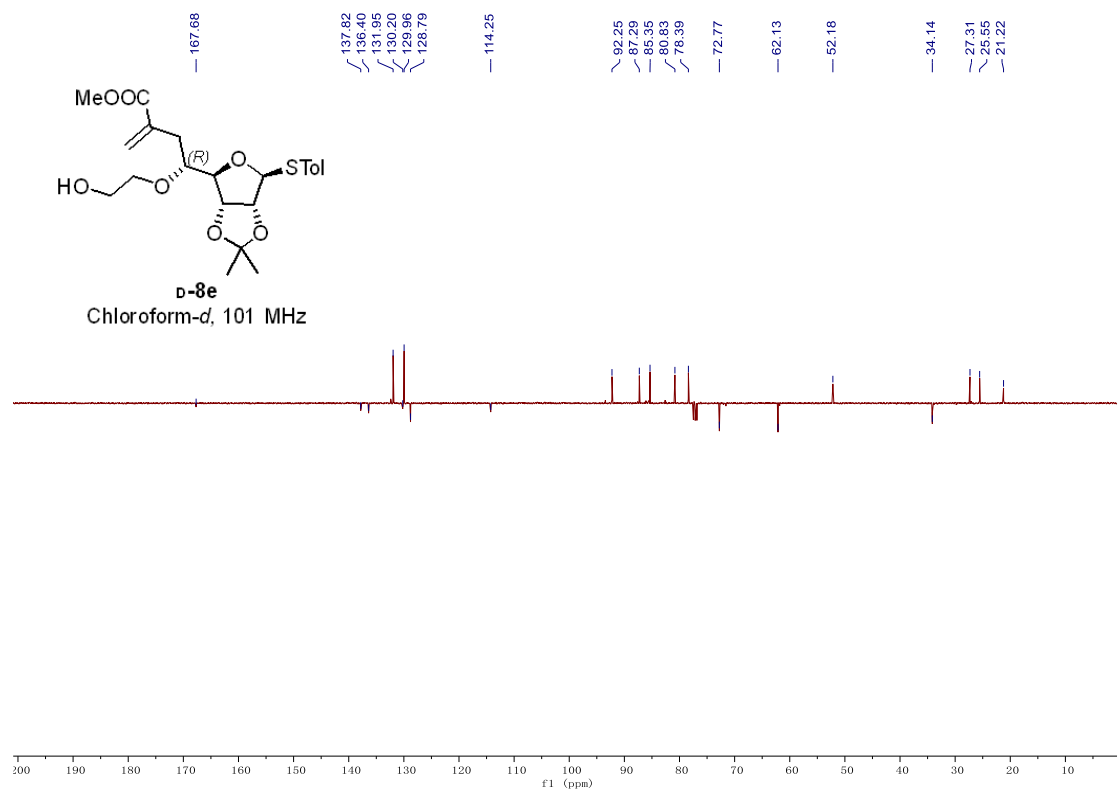

### <sup>13</sup>C NMR Spectra of compound **d-8e**



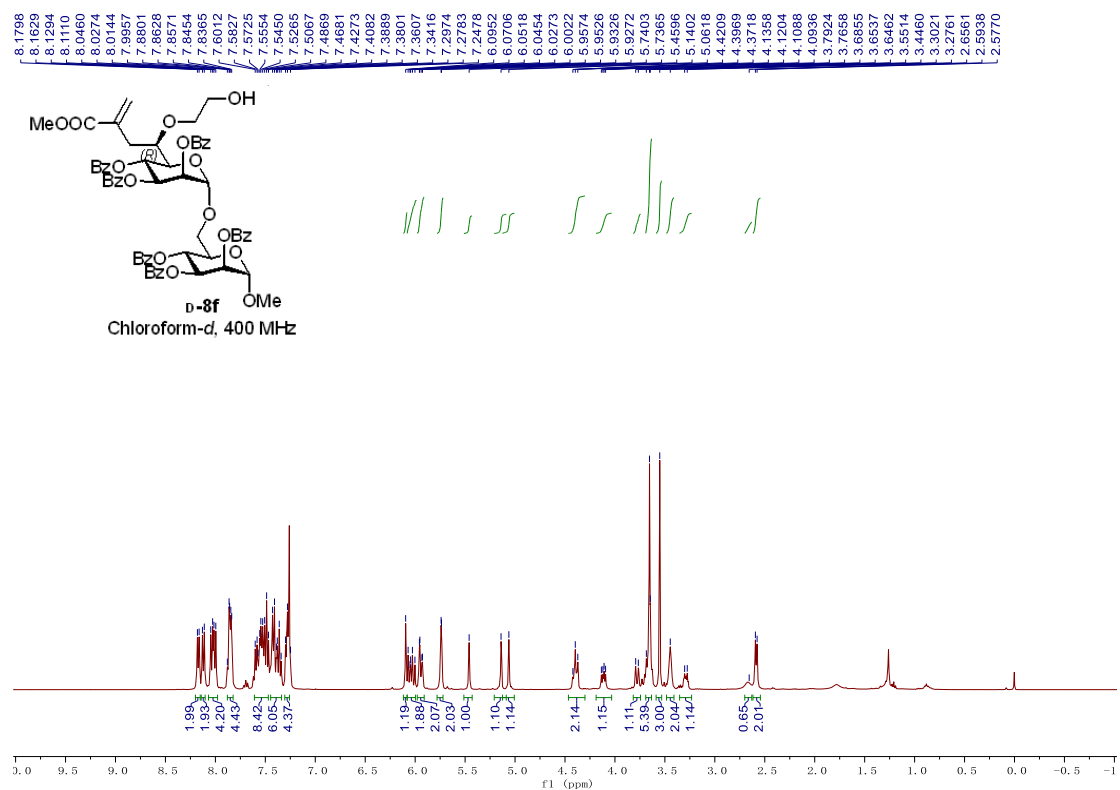

### <sup>1</sup>H NMR Spectra of compound d-8f

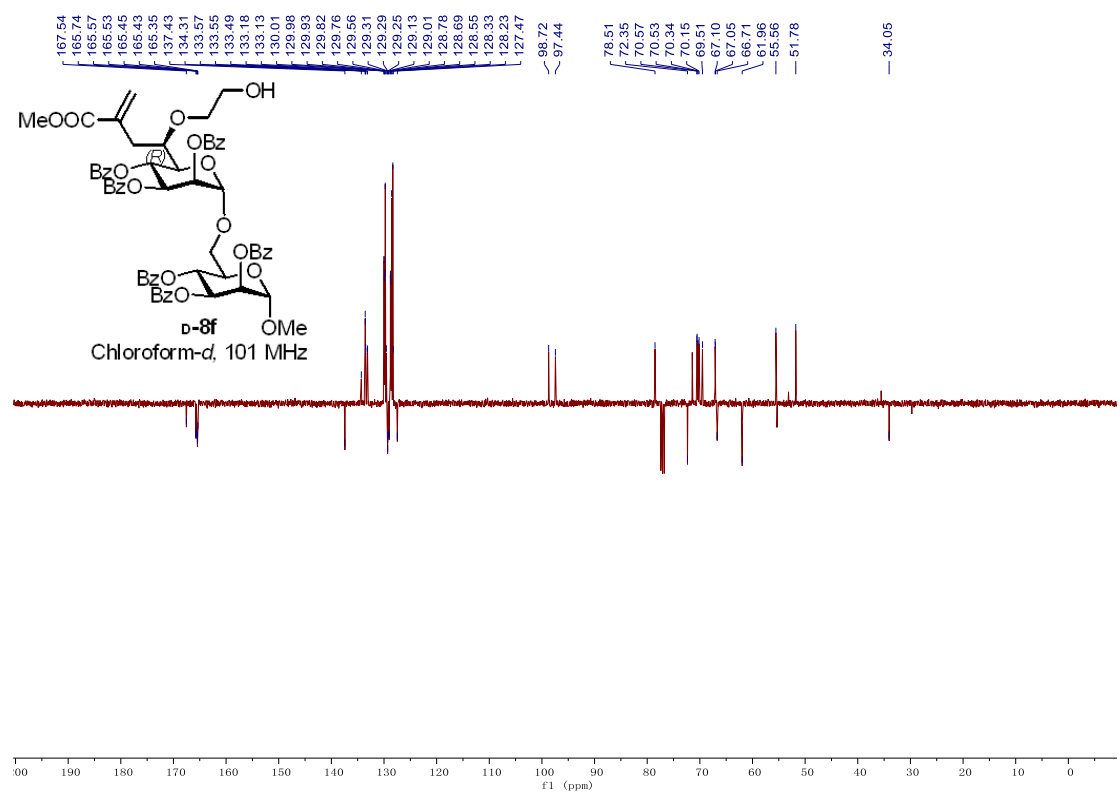

### <sup>13</sup>C NMR Spectra of compound d-8f



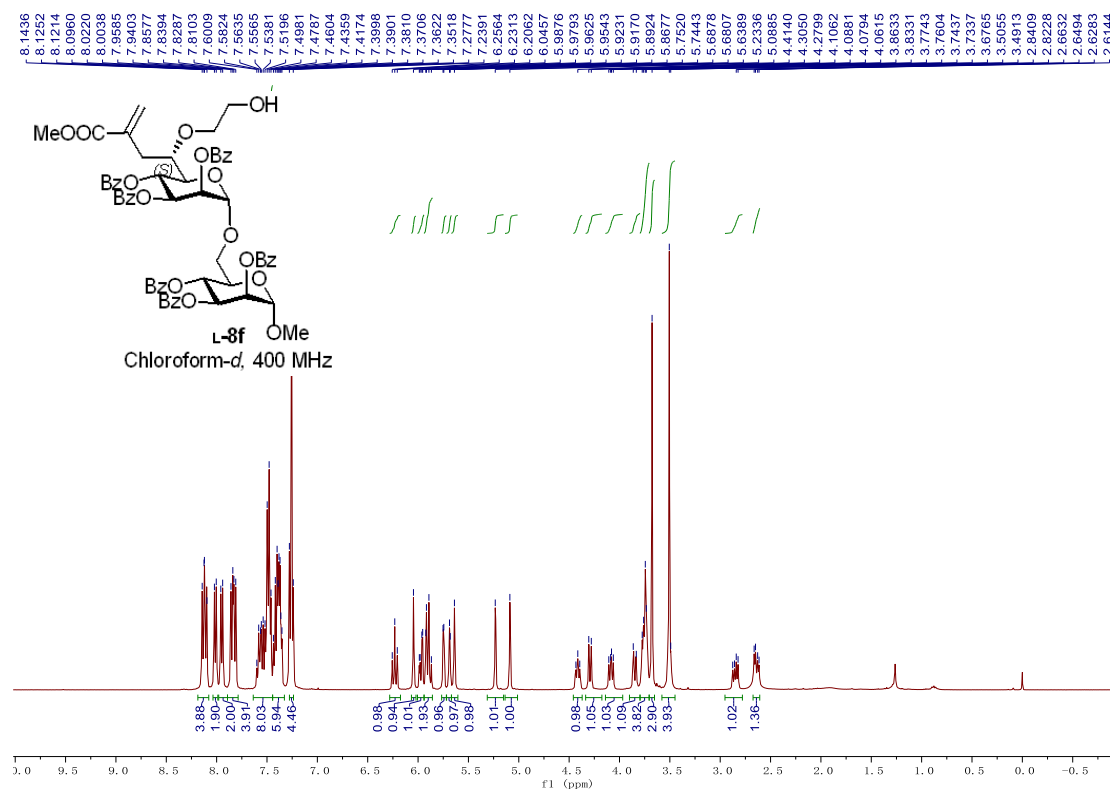

**<sup>1</sup>H NMR Spectra of compound L-8f**

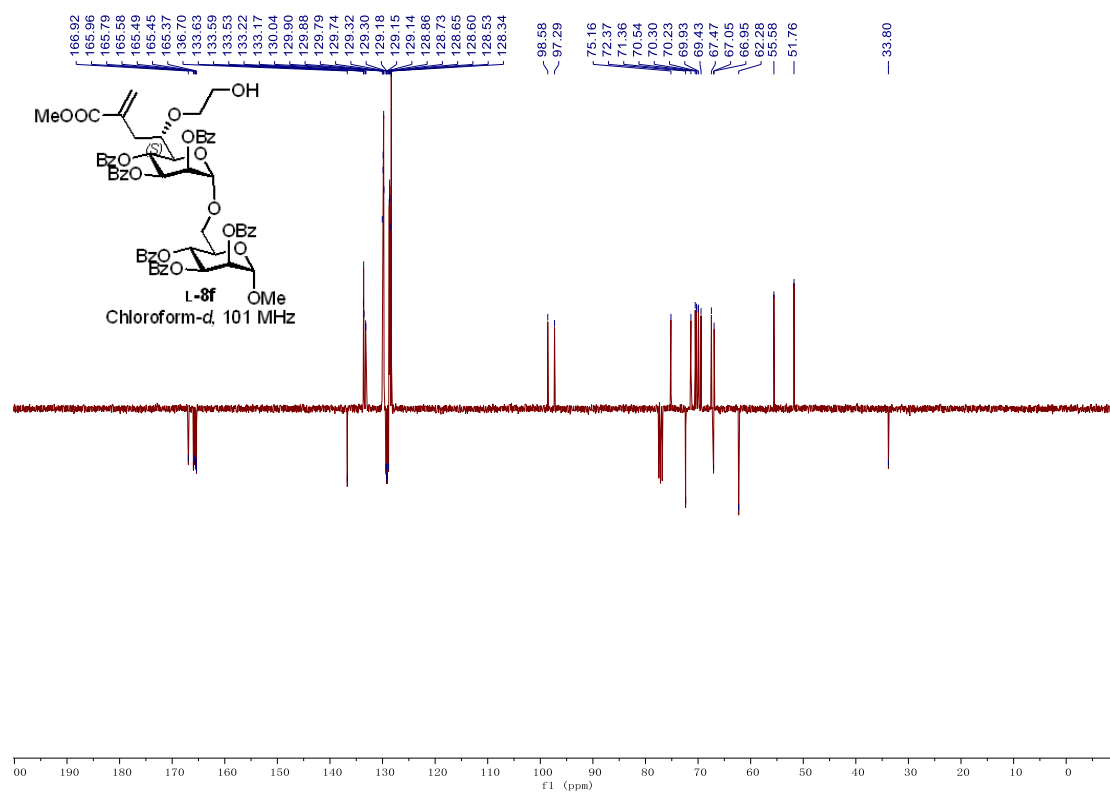

**<sup>13</sup>C NMR Spectra of compound L-8f**

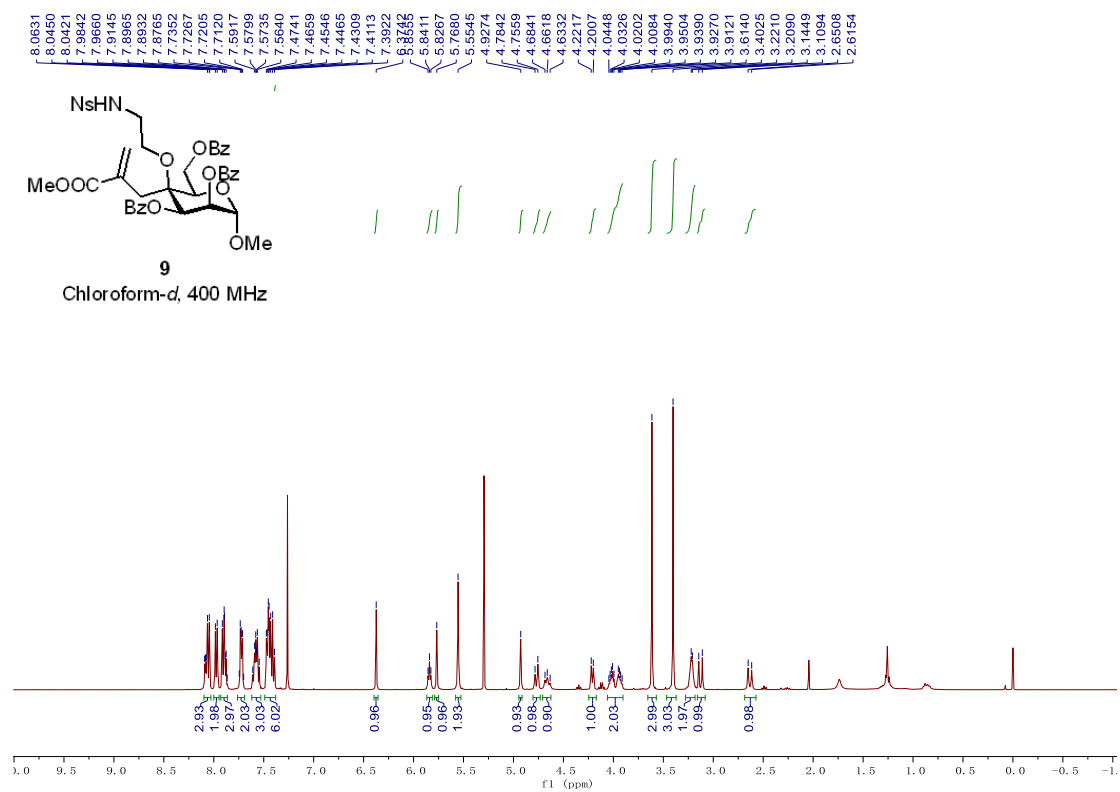

### <sup>1</sup>H NMR Spectra of compound **9**

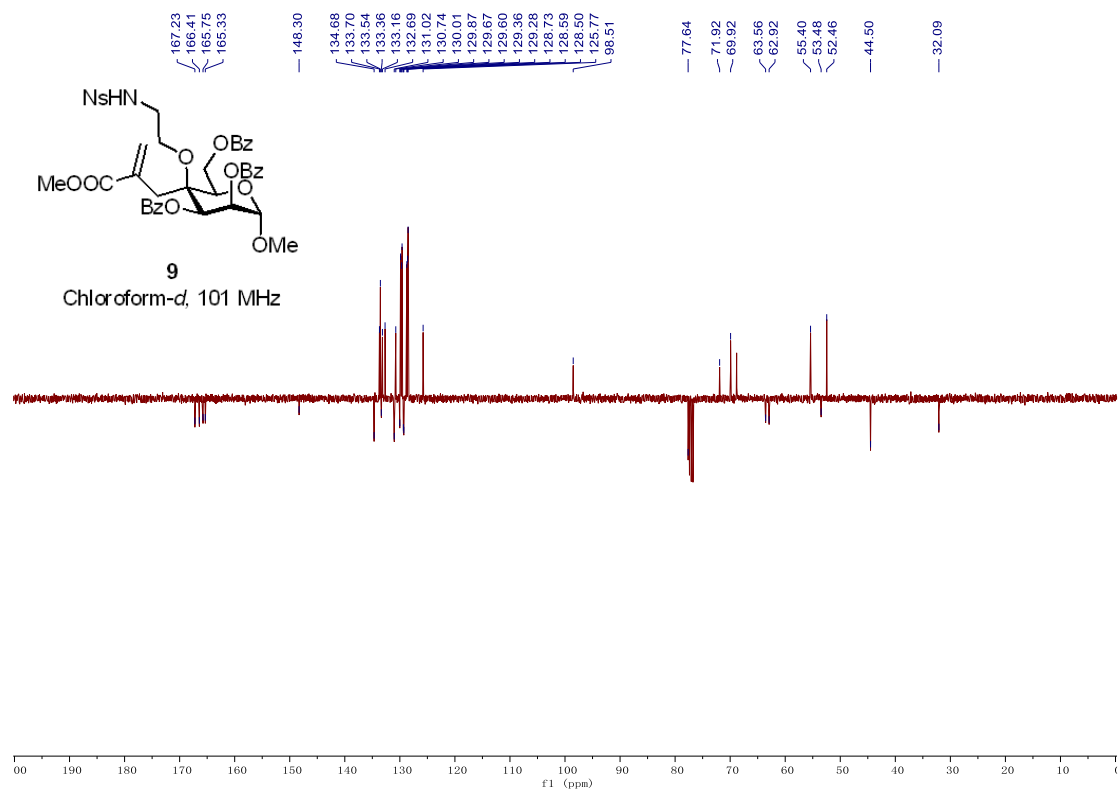

### <sup>13</sup>C NMR Spectra of compound **9**

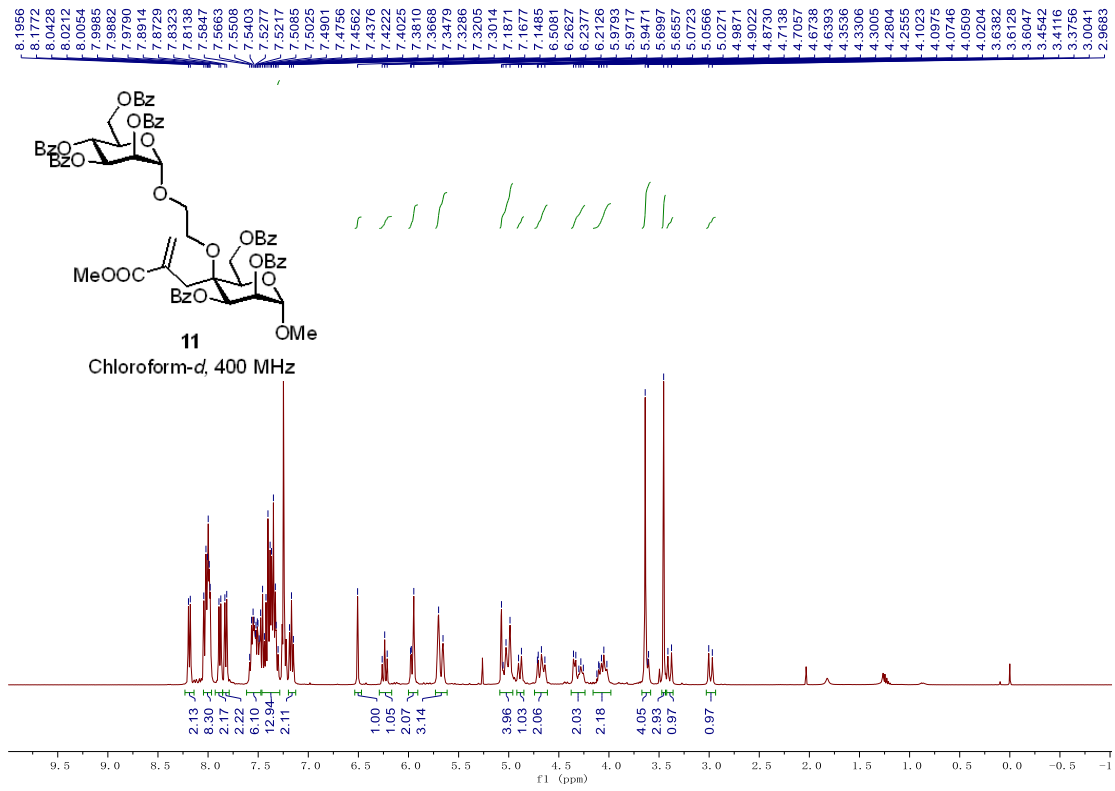

**$^1\text{H}$  NMR Spectra of compound 11**

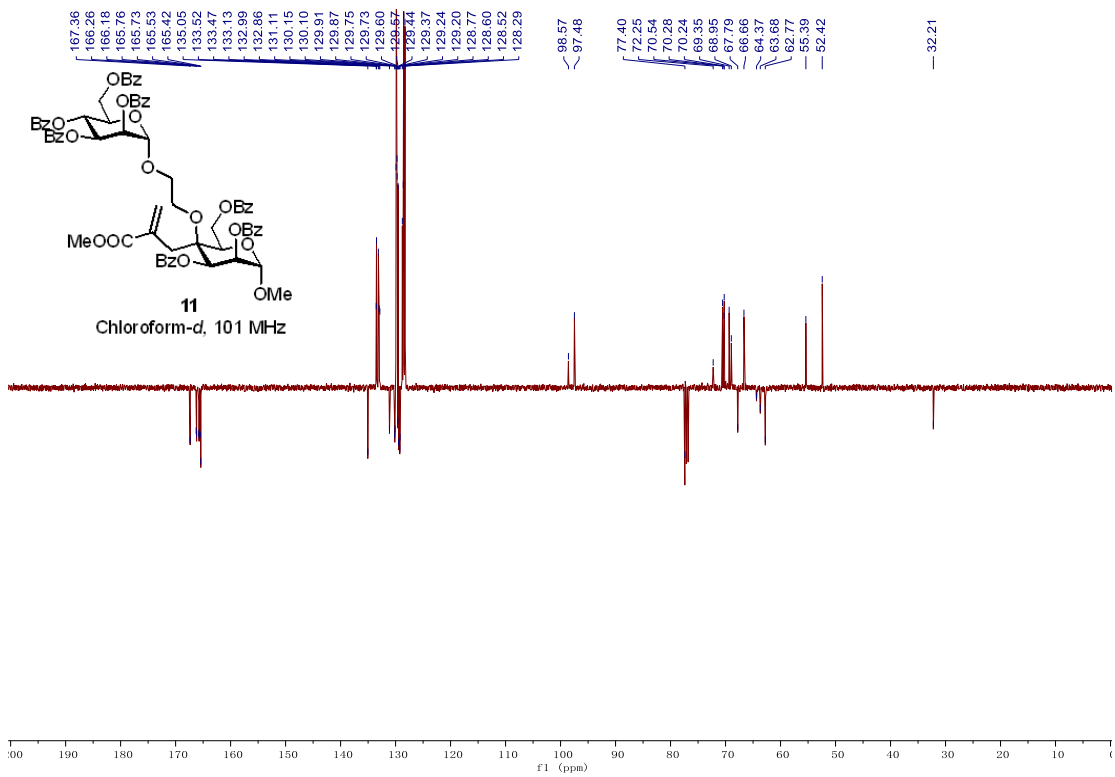

**$^{13}\text{C}$  NMR Spectra of compound 11**

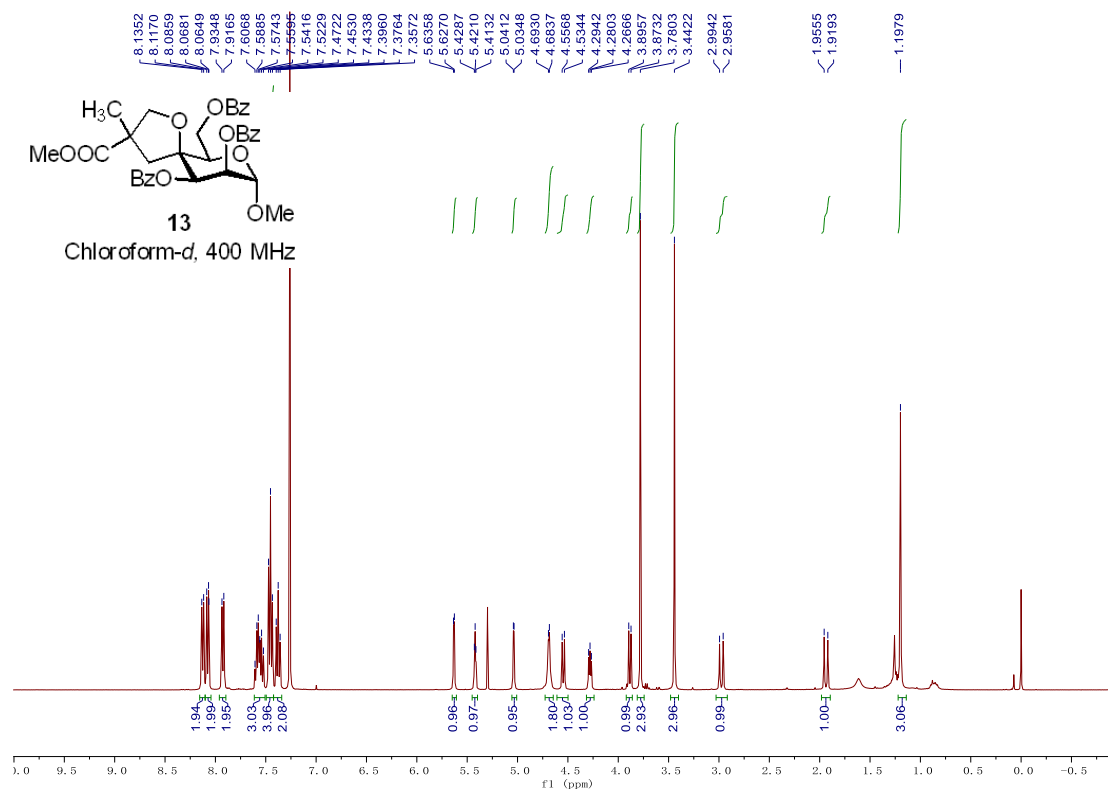

### $^1\text{H}$ NMR Spectra of compound 13

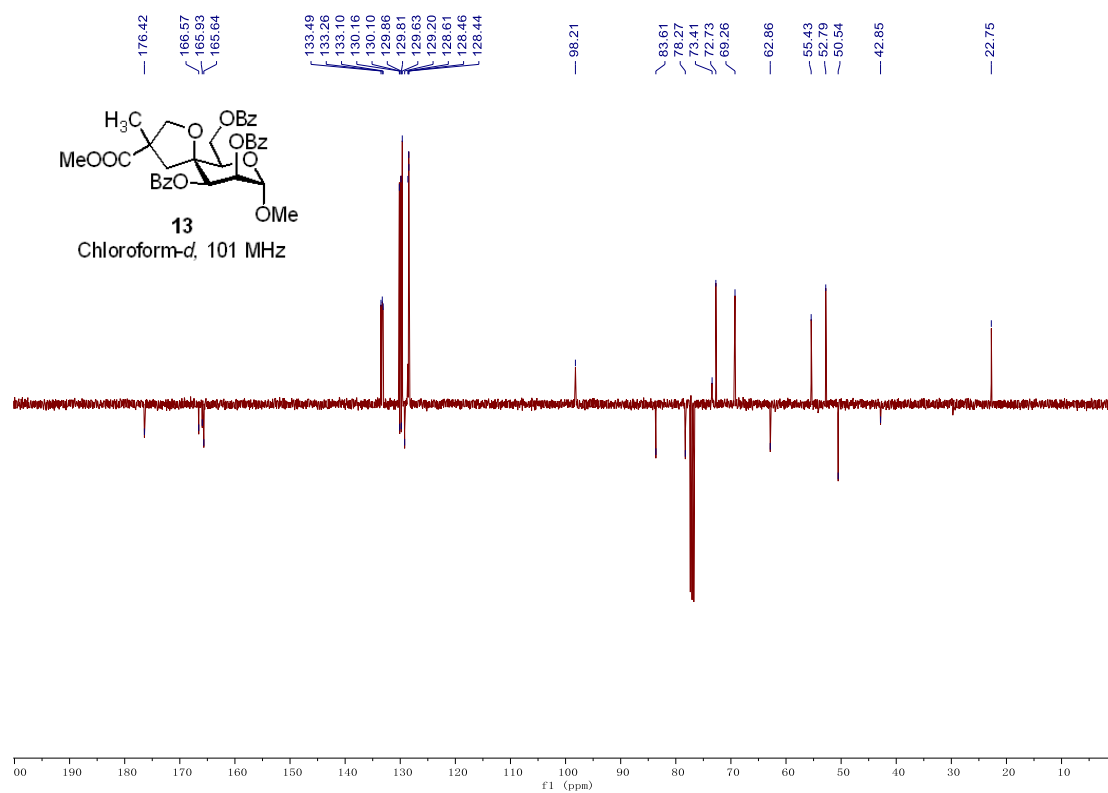

### $^{13}\text{C}$ NMR Spectra of compound 13

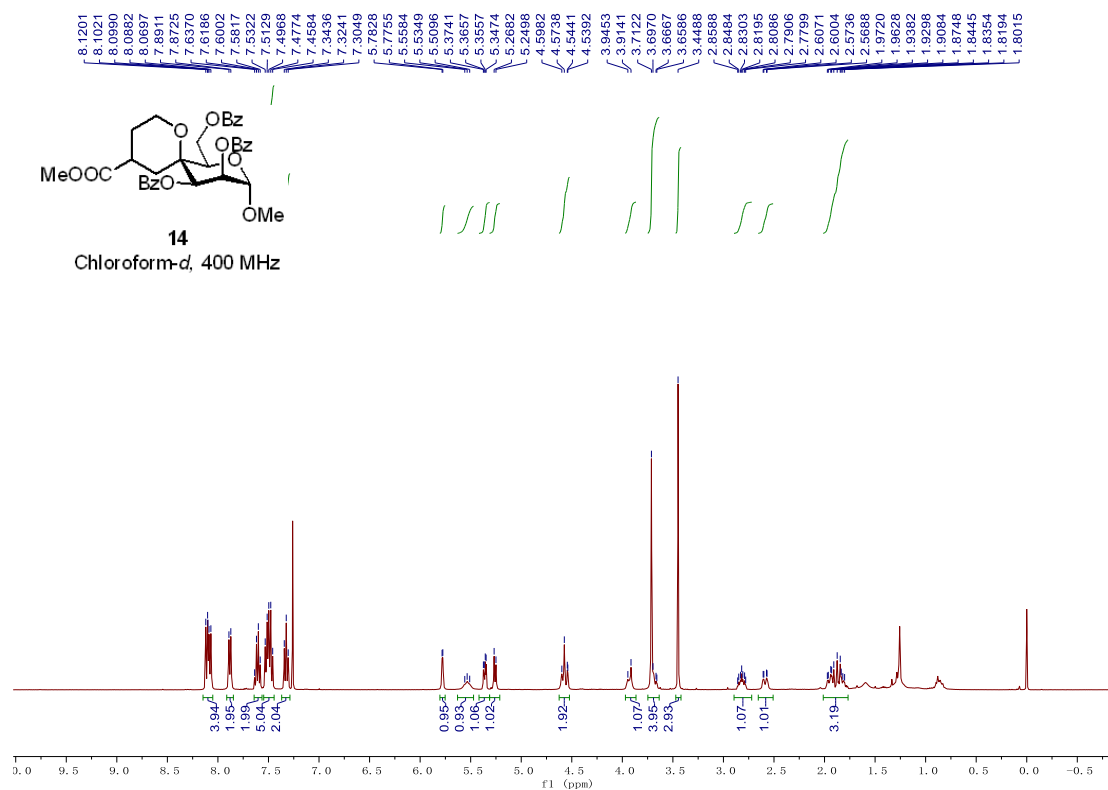

**<sup>1</sup>H NMR Spectra of compound 14**

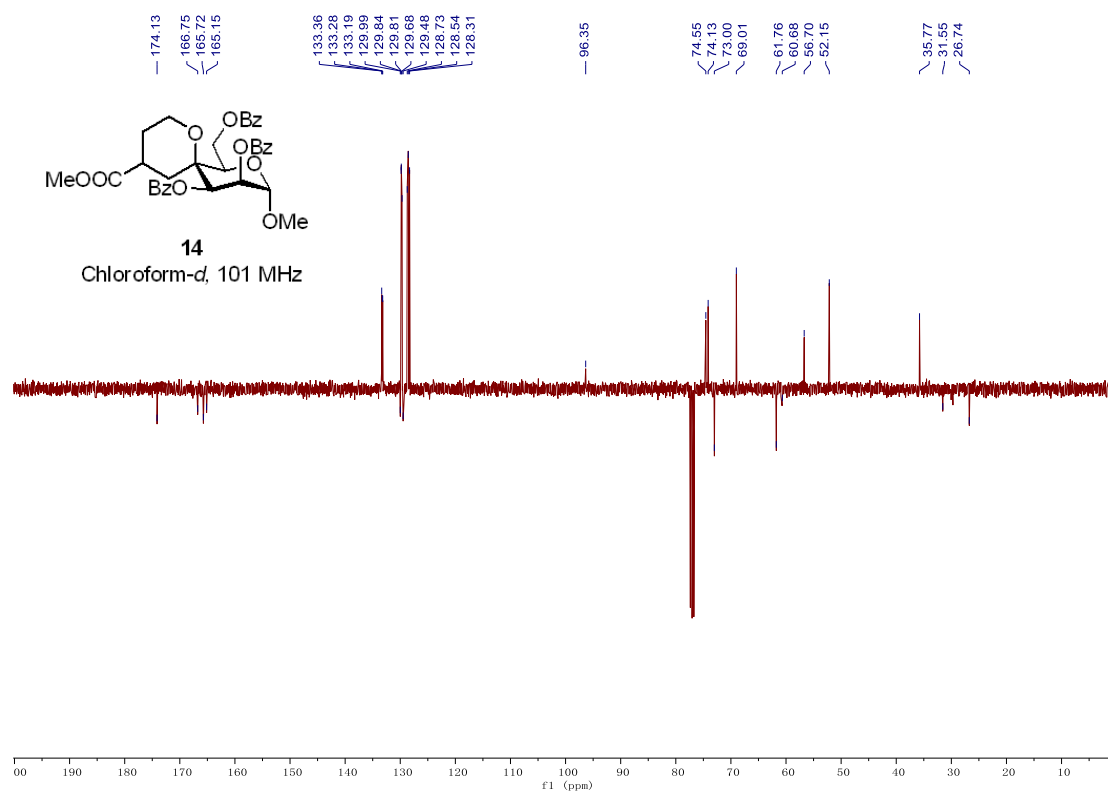

**<sup>13</sup>C NMR Spectra of compound 14**

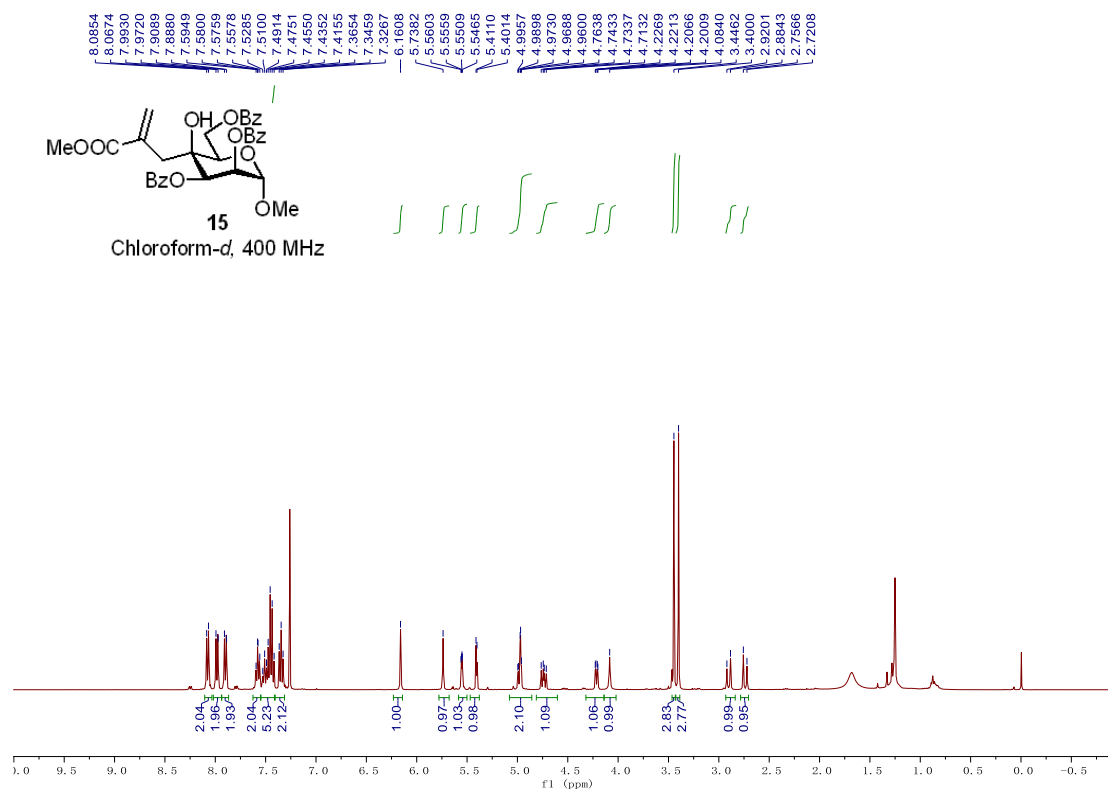

$^1\text{H}$  NMR Spectra of compound 15

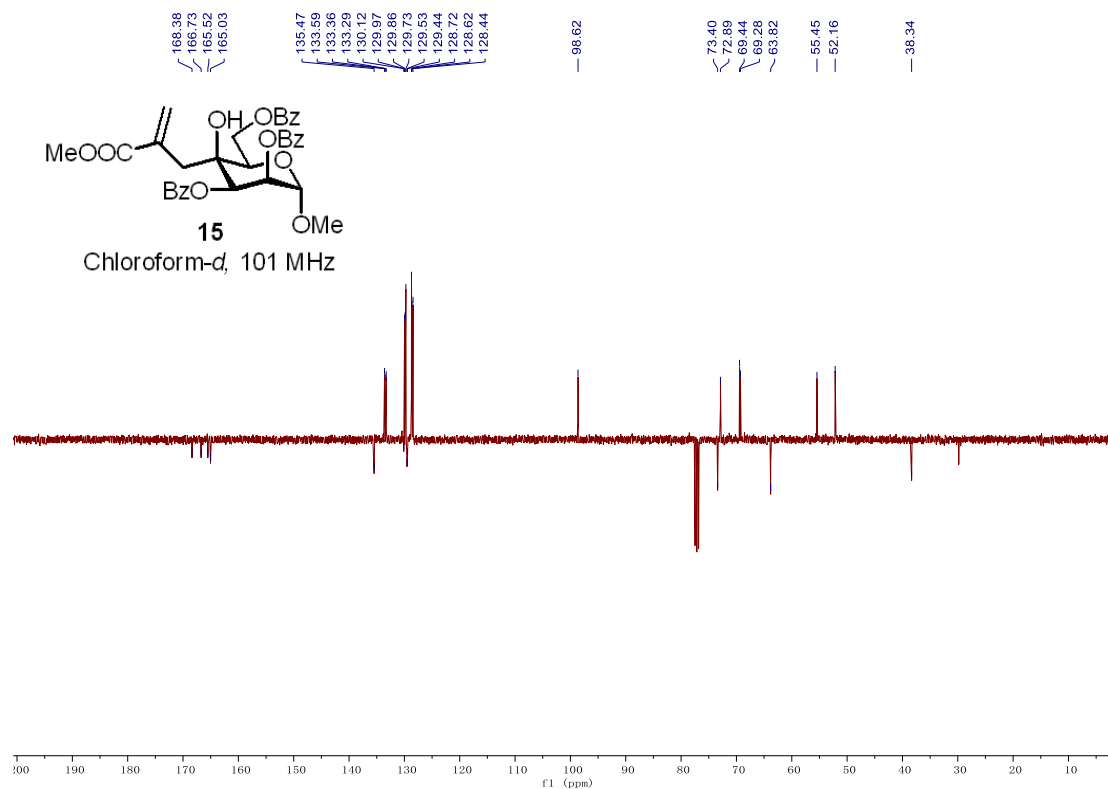

$^{13}\text{C}$  NMR Spectra of compound 15

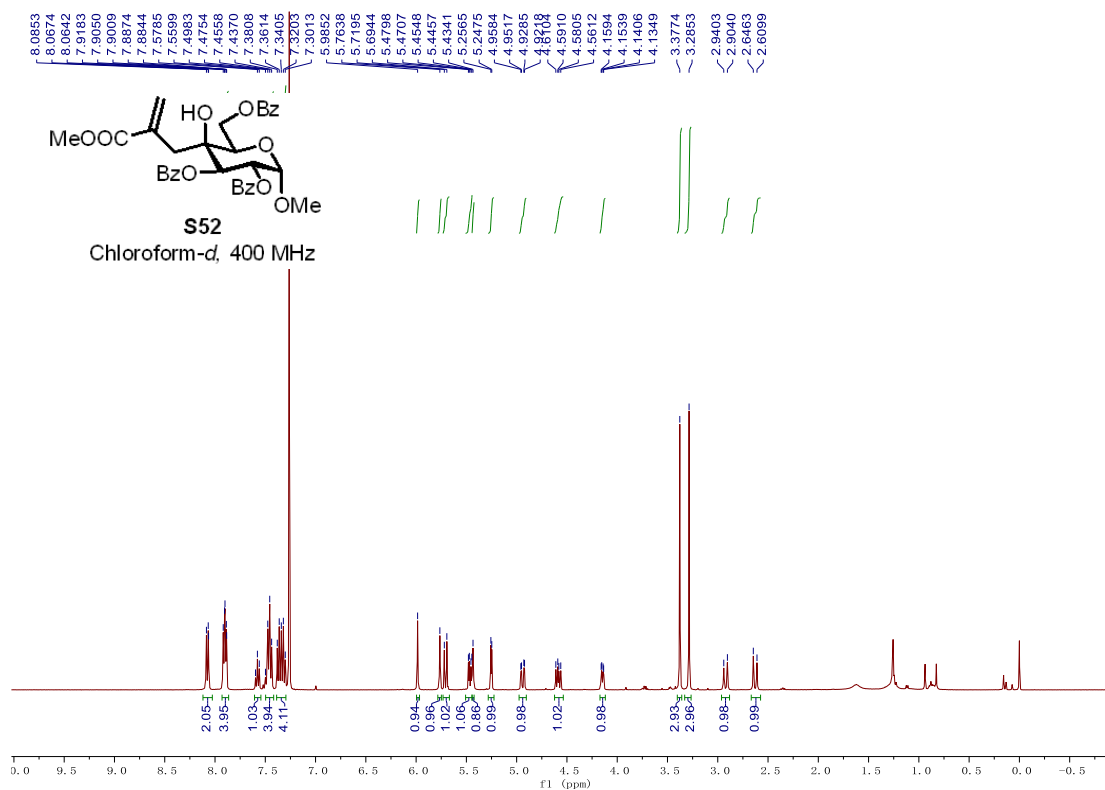

### <sup>1</sup>H NMR Spectra of compound S52

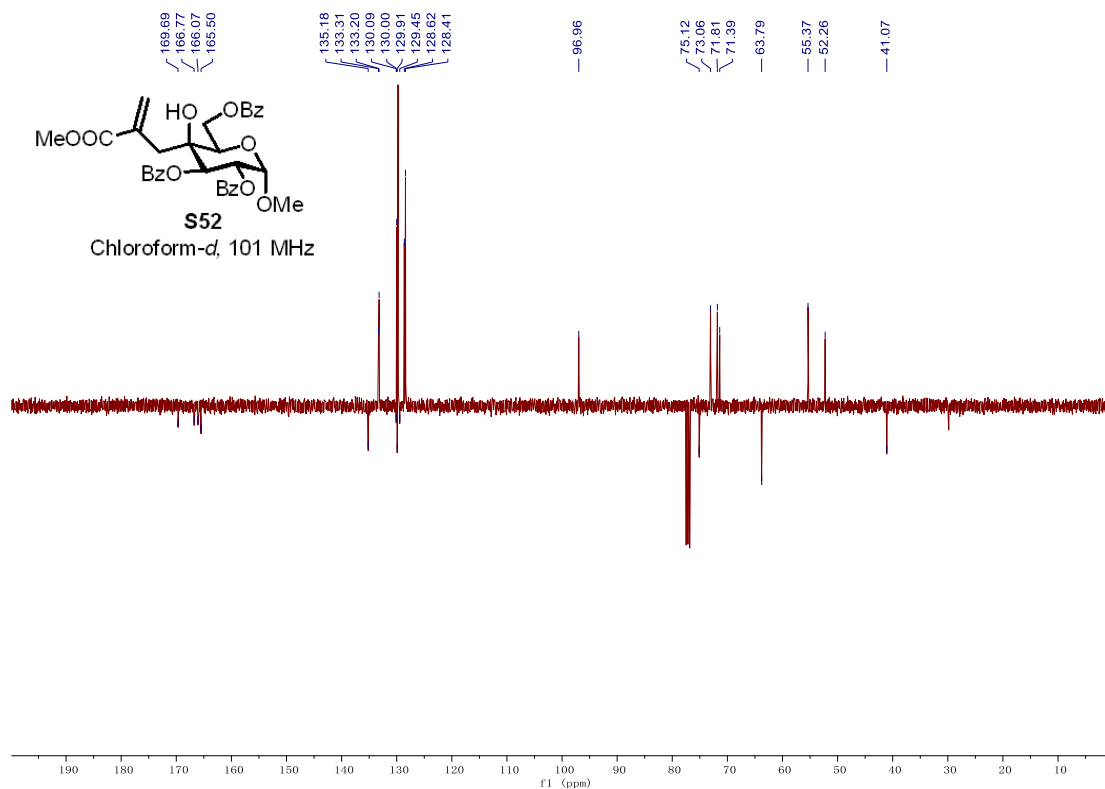

### <sup>13</sup>C NMR Spectra of compound S52

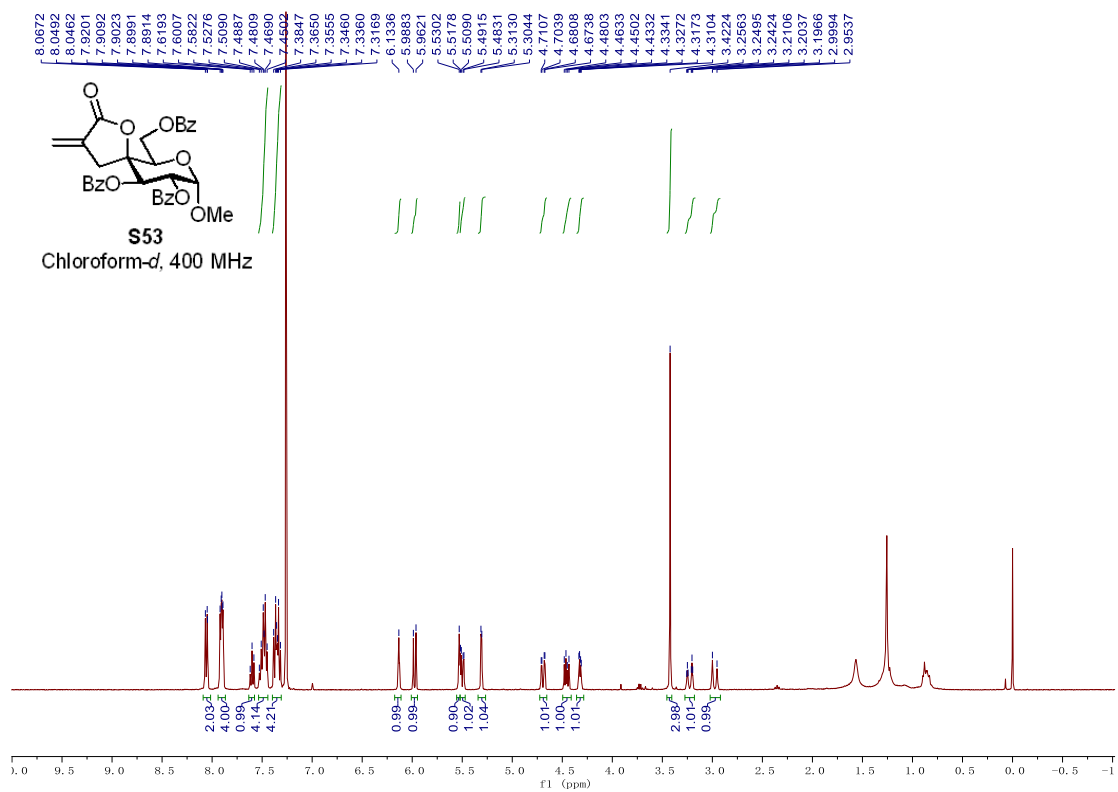

### <sup>1</sup>H NMR Spectra of compound S53

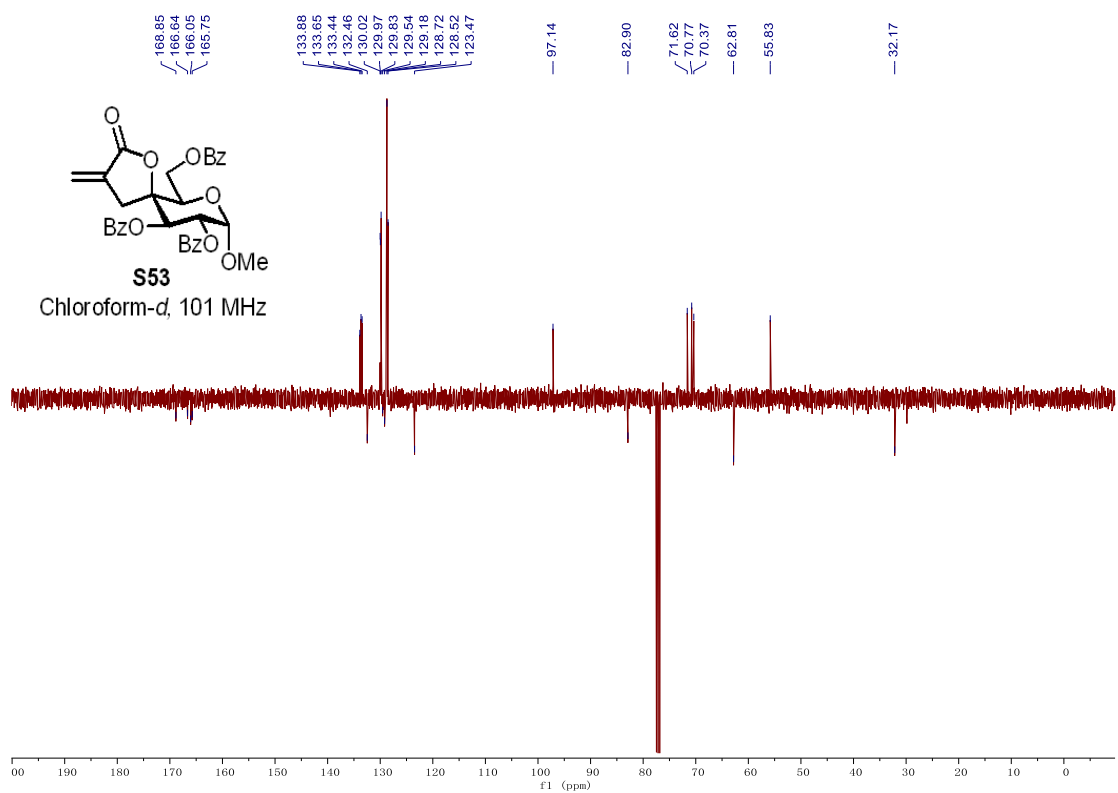

### <sup>13</sup>C NMR Spectra of compound S53



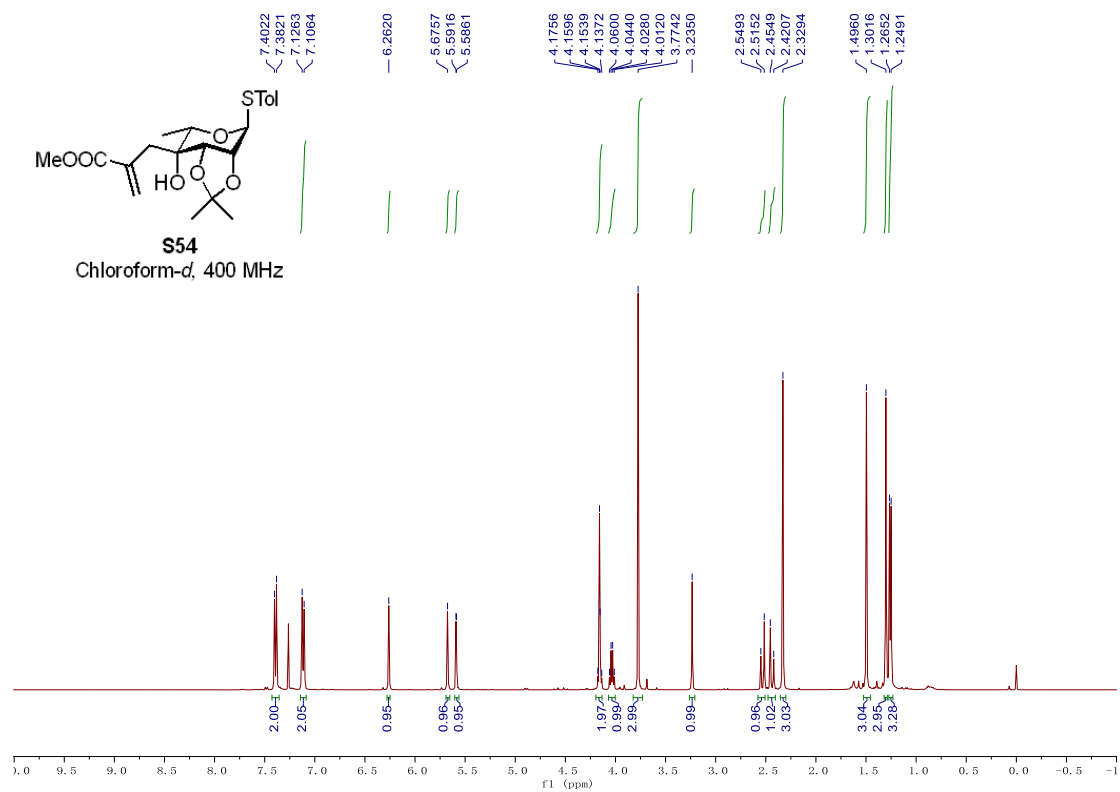

### $^1\text{H}$ NMR Spectra of compound S54

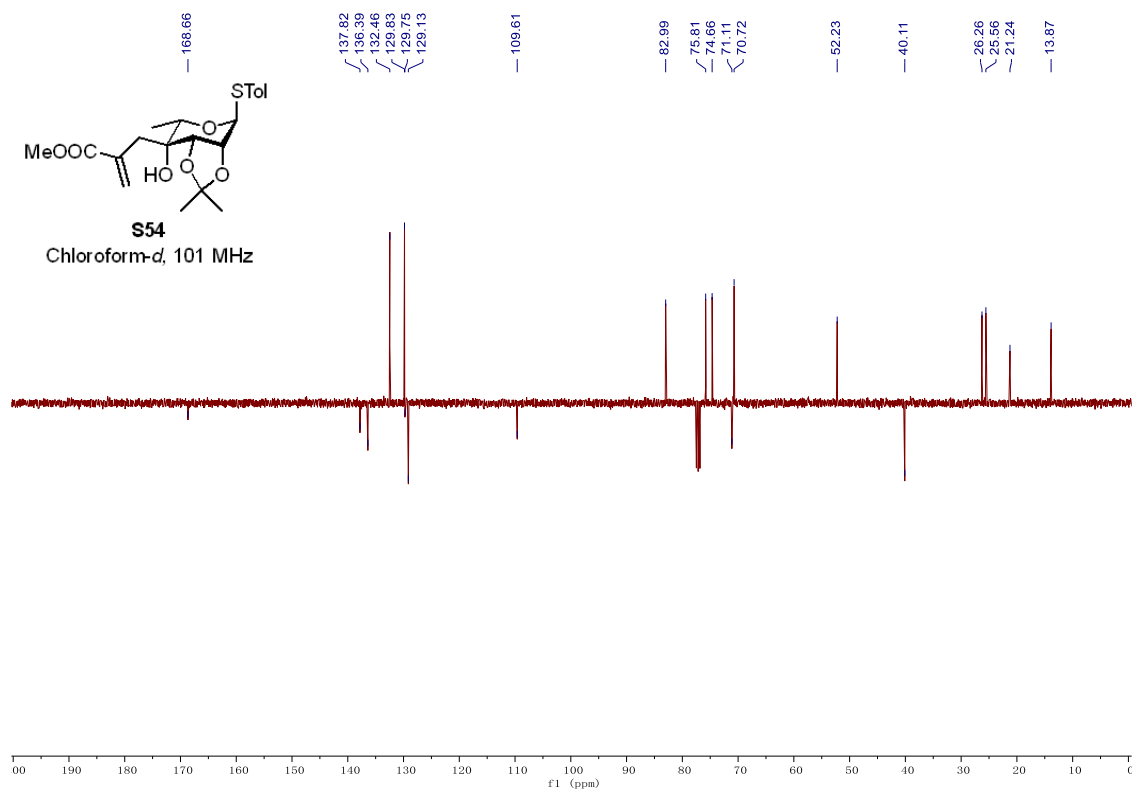

### $^{13}\text{C}$ NMR Spectra of compound S54

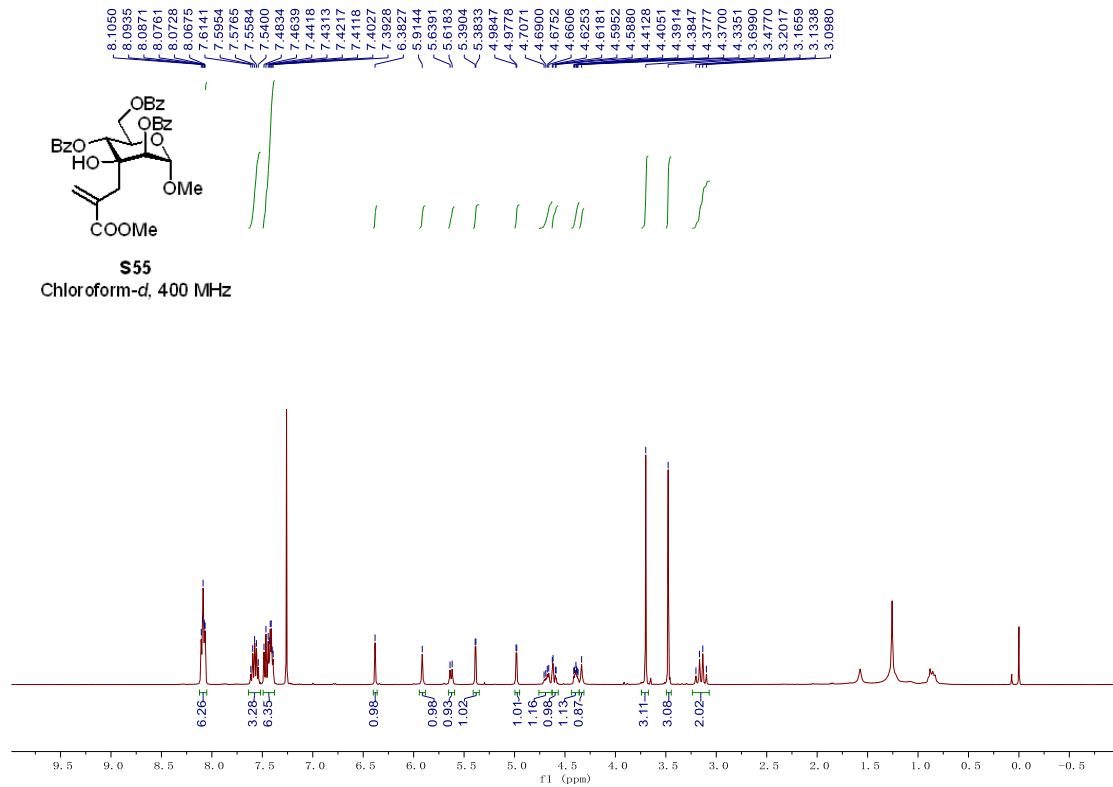

### <sup>1</sup>H NMR Spectra of compound S55

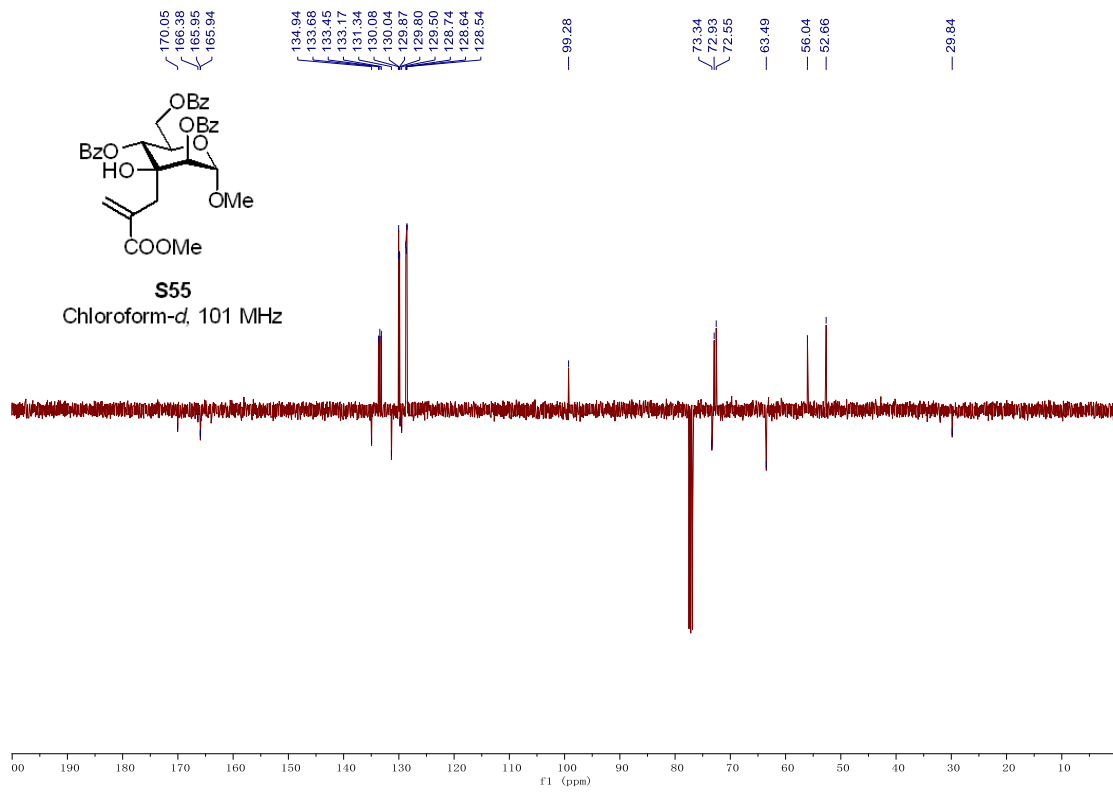

### <sup>13</sup>C NMR Spectra of compound S55

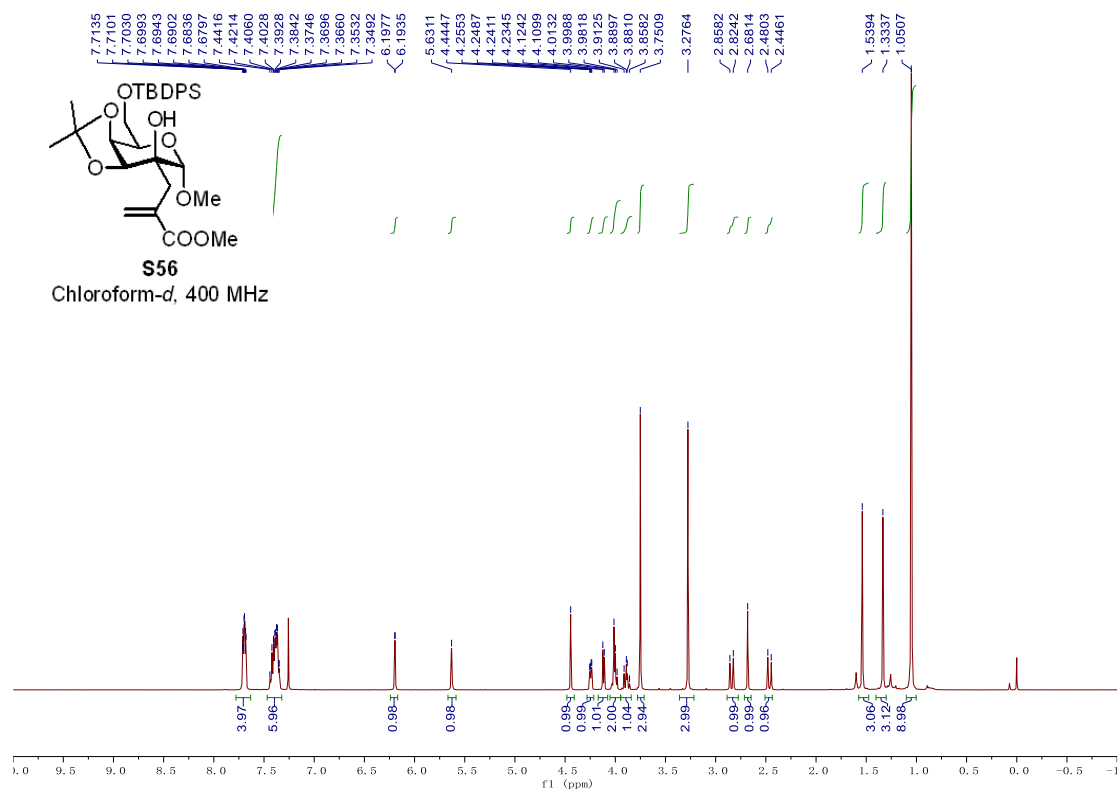

### <sup>1</sup>H NMR Spectra of compound S56

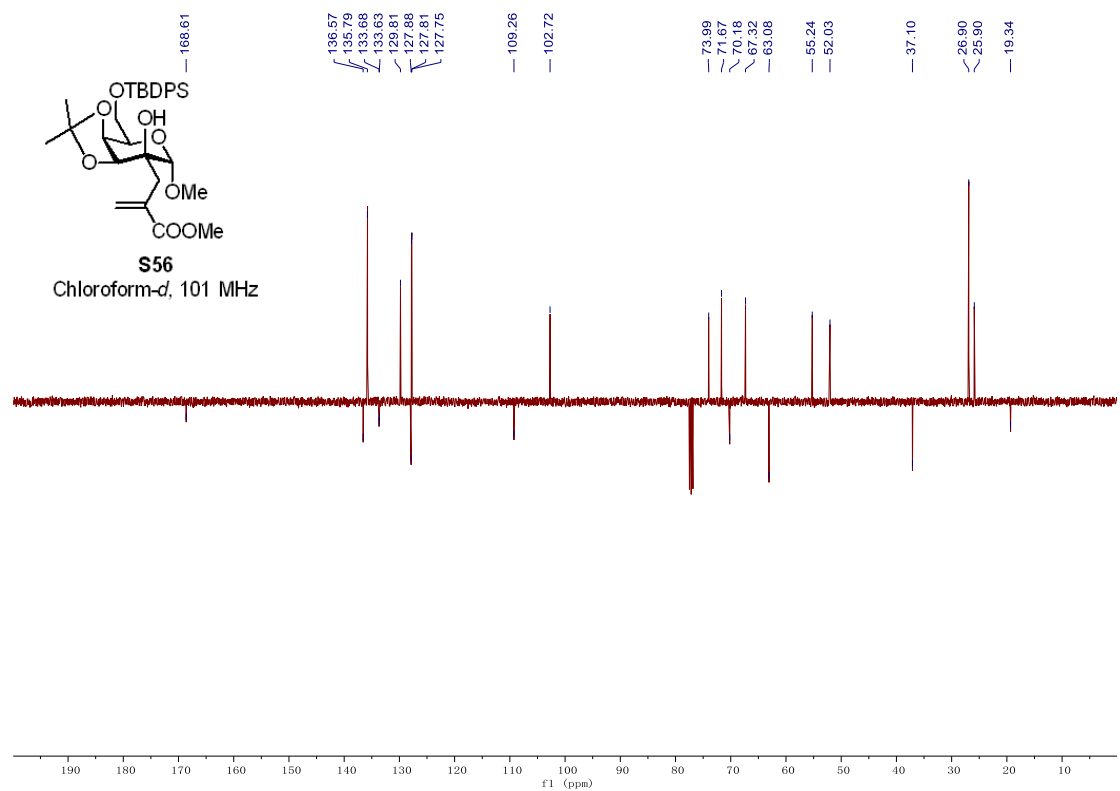

### <sup>13</sup>C NMR Spectra of compound S56

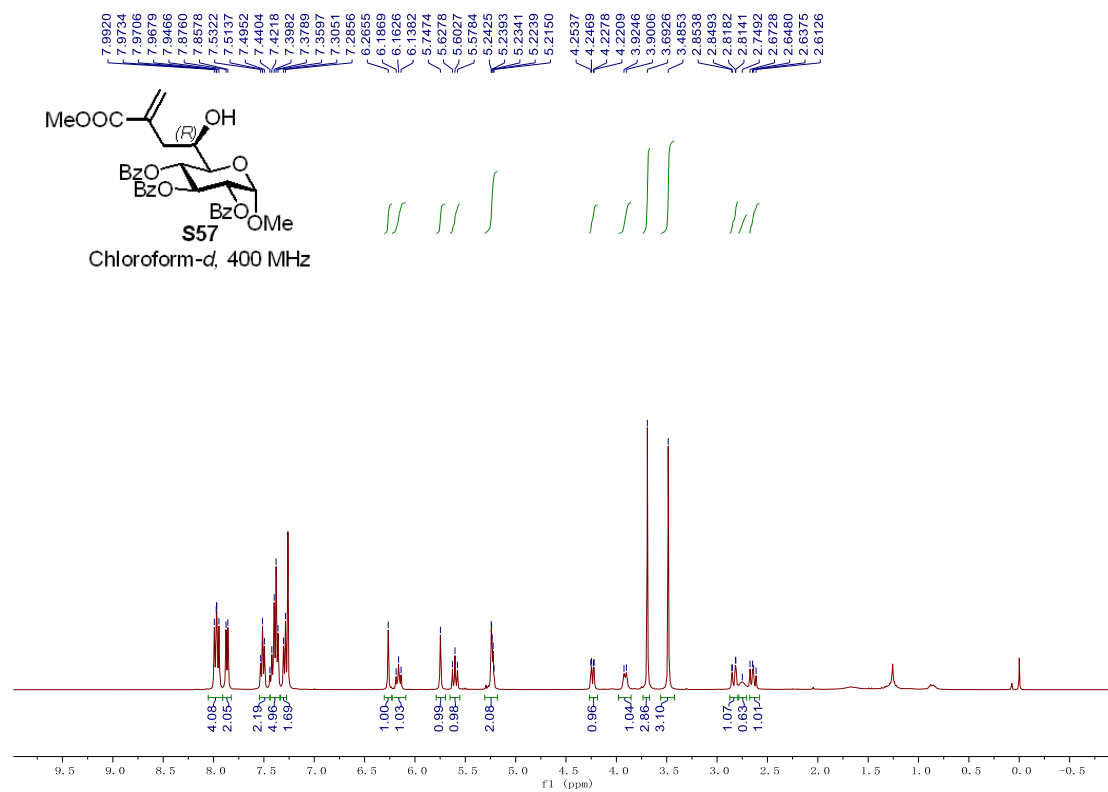

**<sup>1</sup>H NMR Spectra of compound S57**

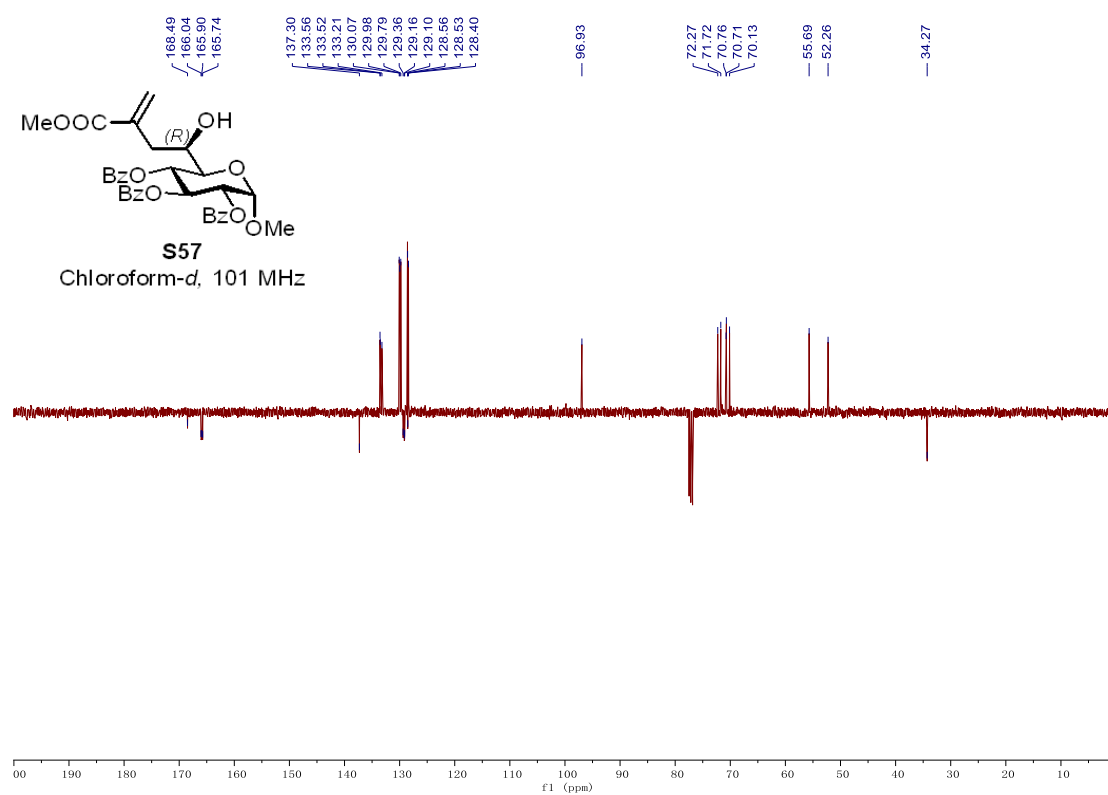

**<sup>13</sup>C NMR Spectra of compound S57**

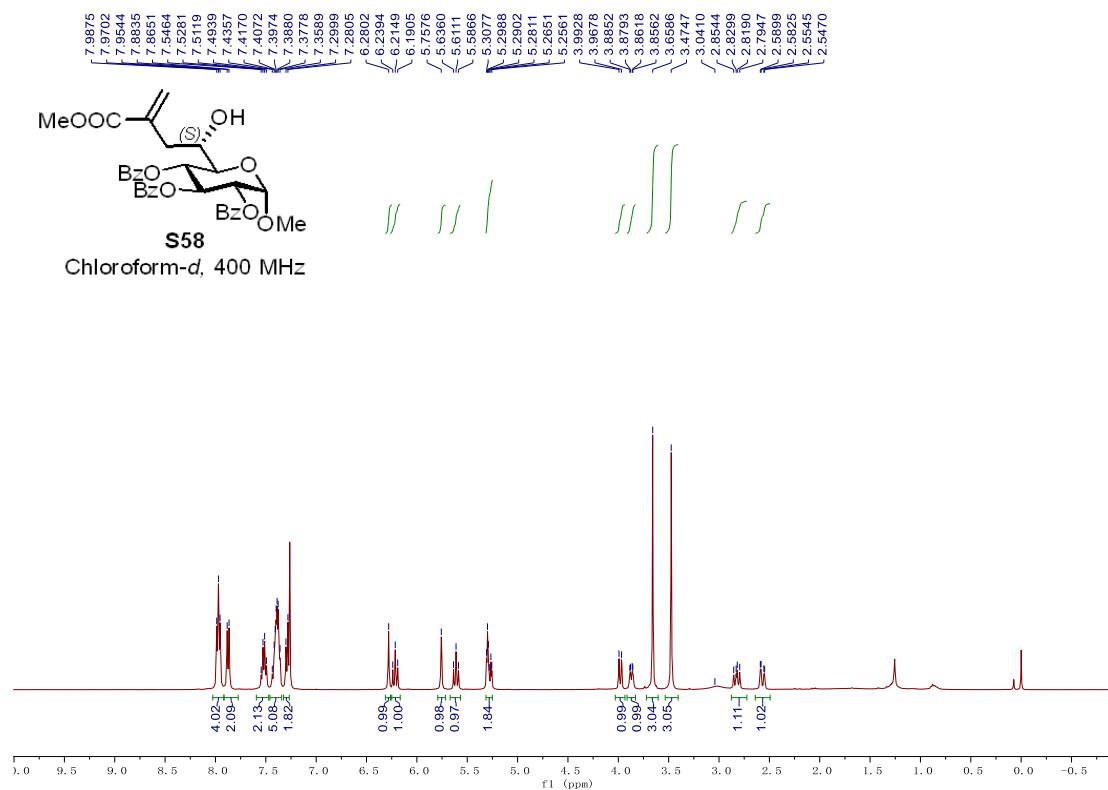

### <sup>1</sup>H NMR Spectra of compound S58

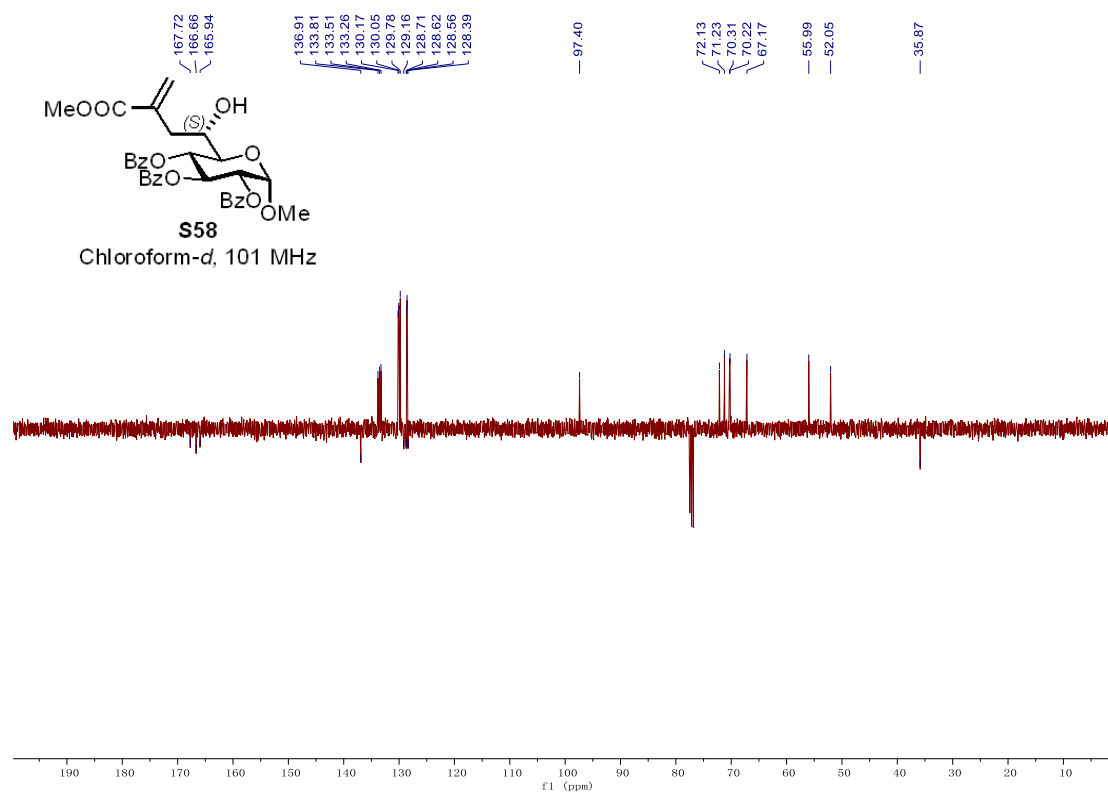

### <sup>13</sup>C NMR Spectra of compound S58

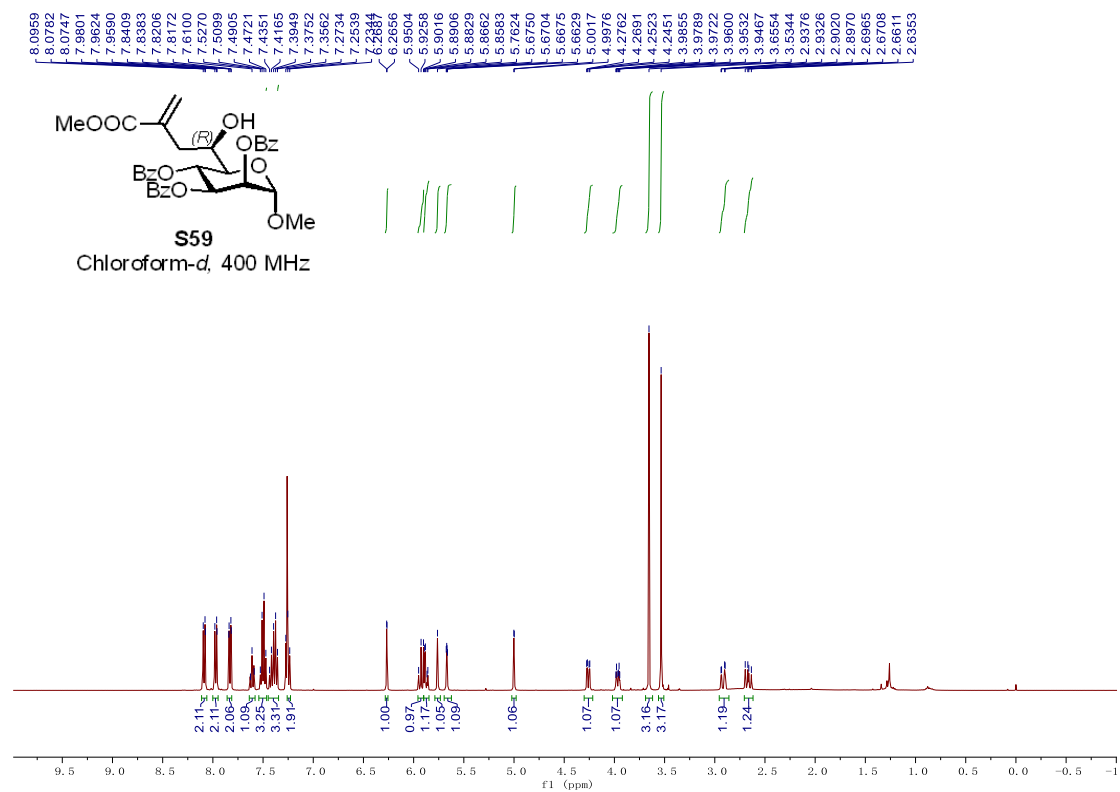

**<sup>1</sup>H NMR Spectra of compound S59**

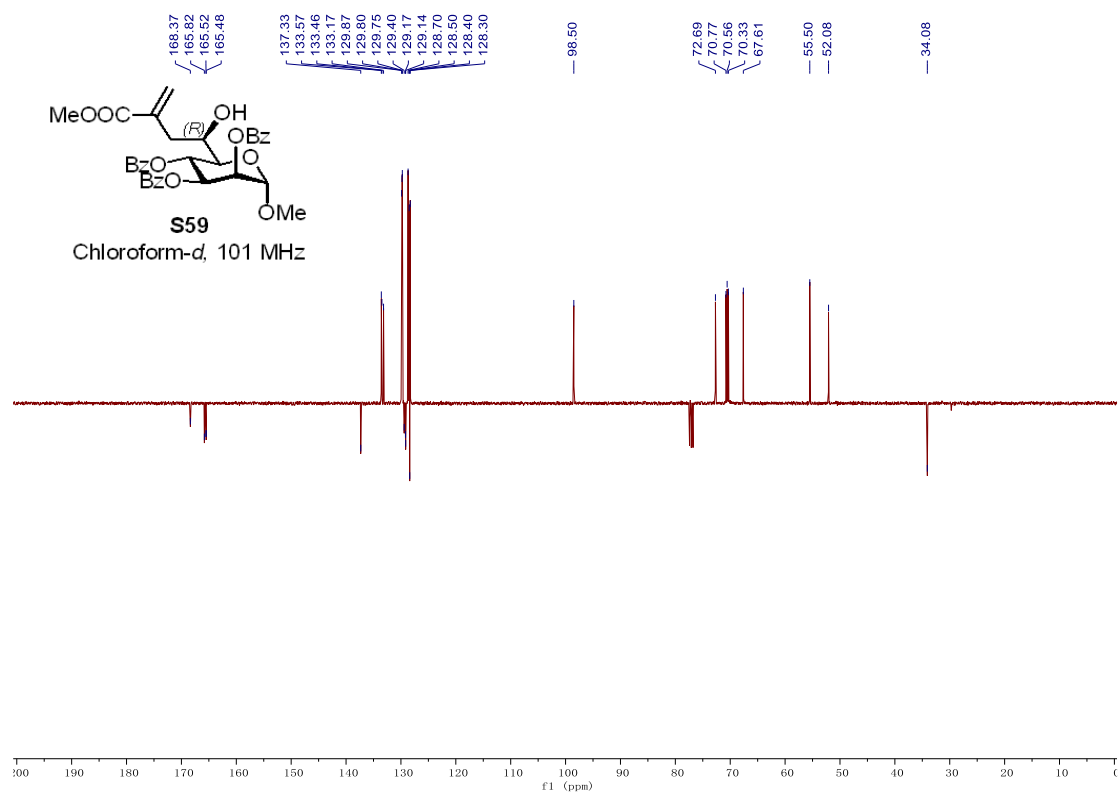

**<sup>13</sup>C NMR Spectra of compound S59**

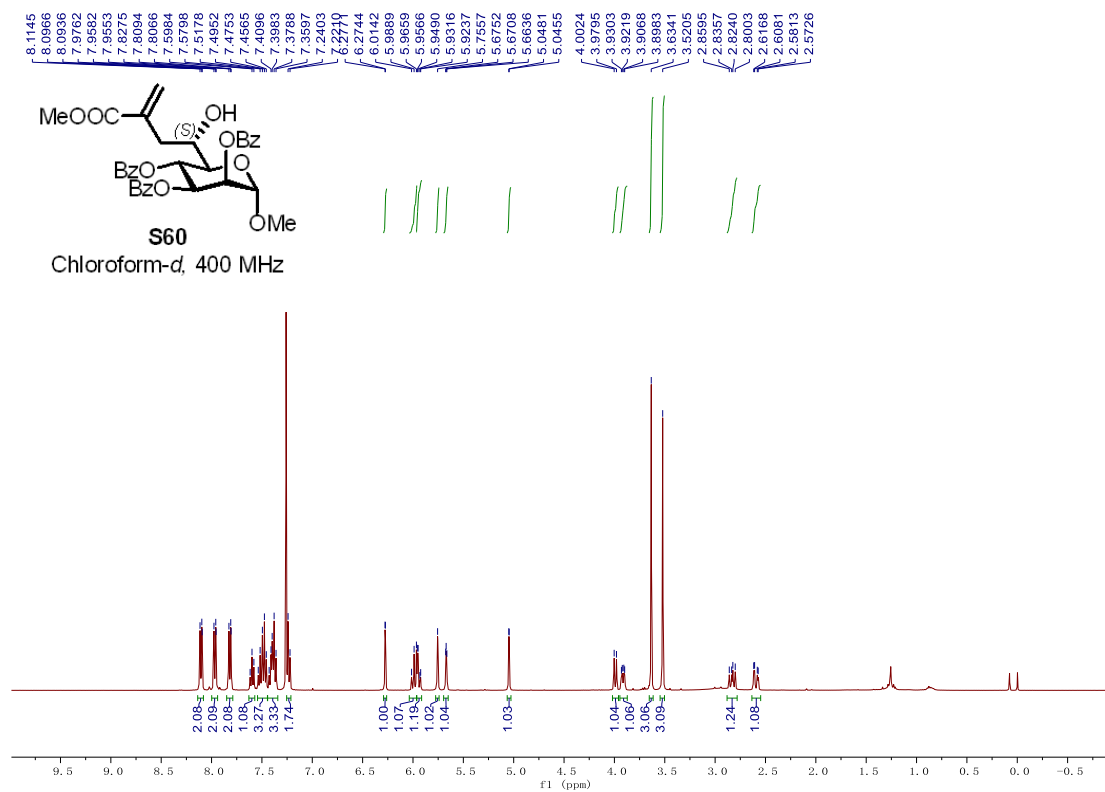

**<sup>1</sup>H NMR Spectra of compound S60**

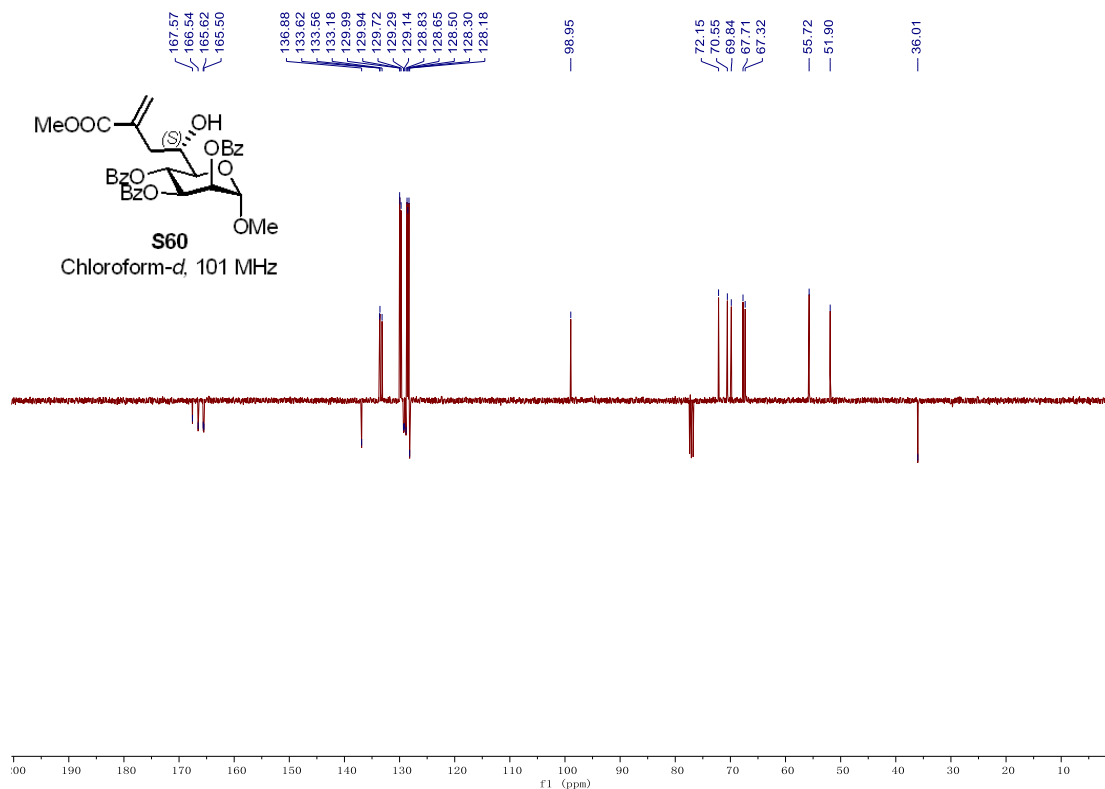

**<sup>13</sup>C NMR Spectra of compound S60**

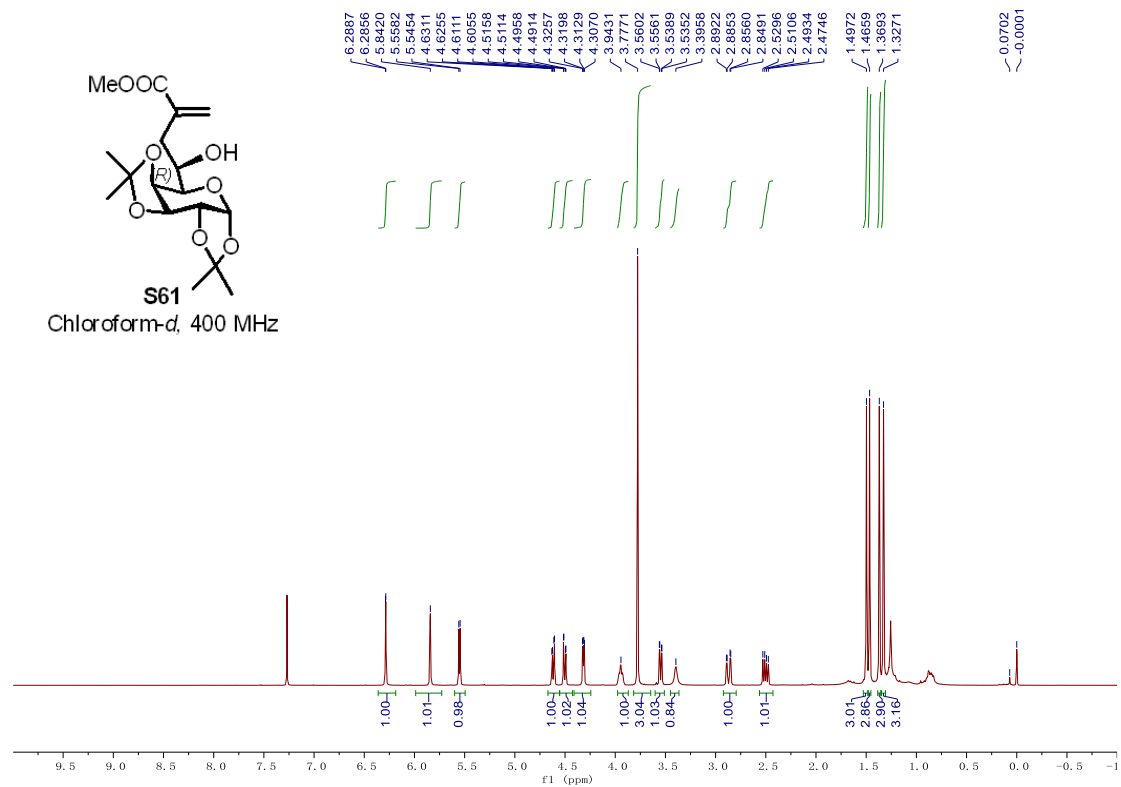

### <sup>1</sup>H NMR Spectra of compound S61

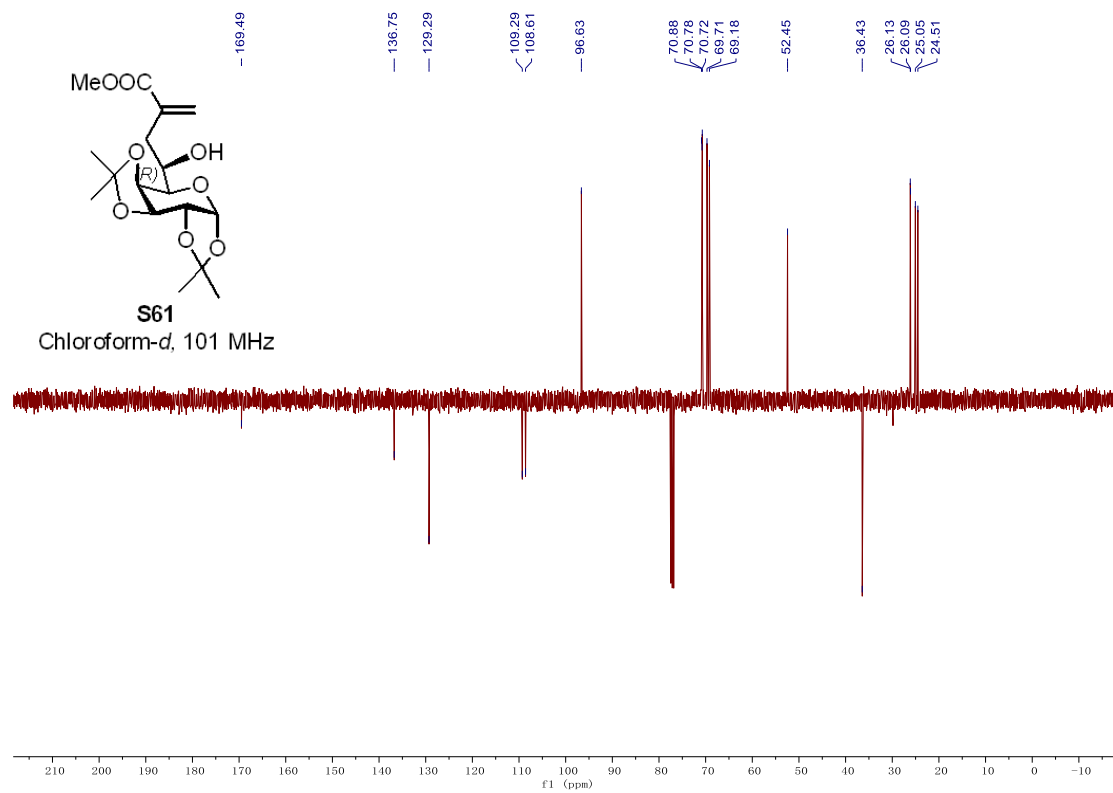

### <sup>13</sup>C NMR Spectra of compound S61



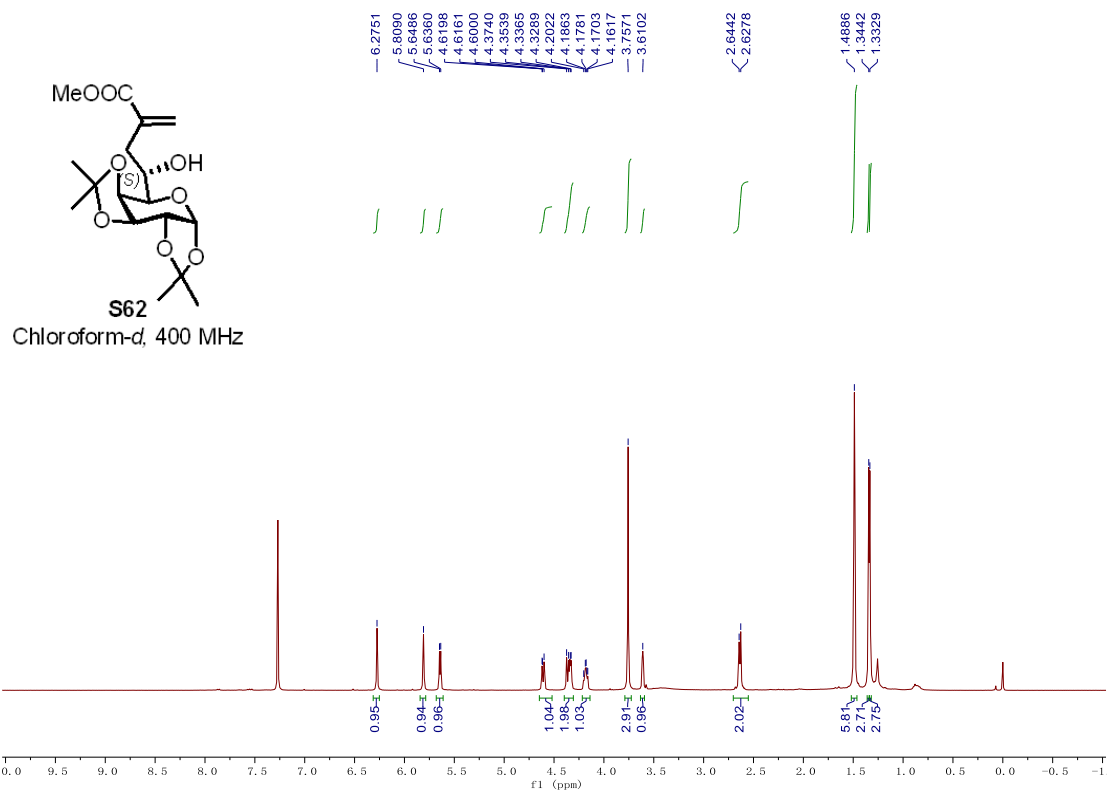

### <sup>1</sup>H NMR Spectra of compound S62

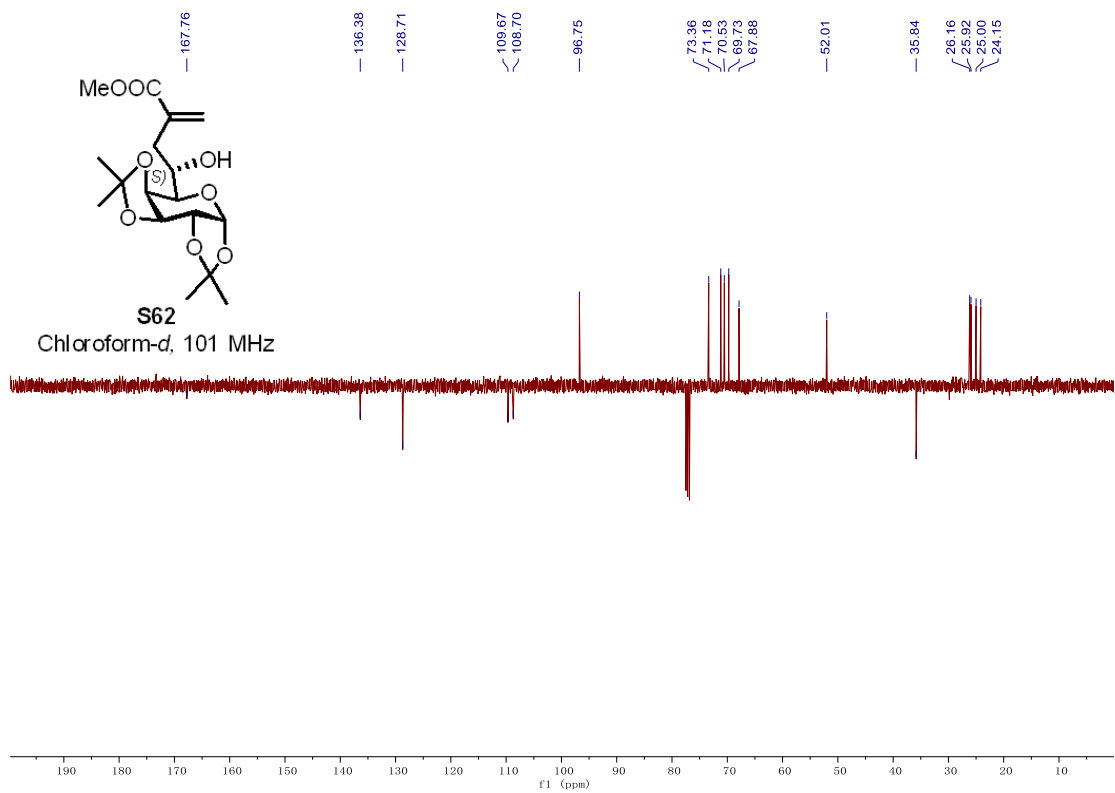

### <sup>13</sup>C NMR Spectra of compound S62

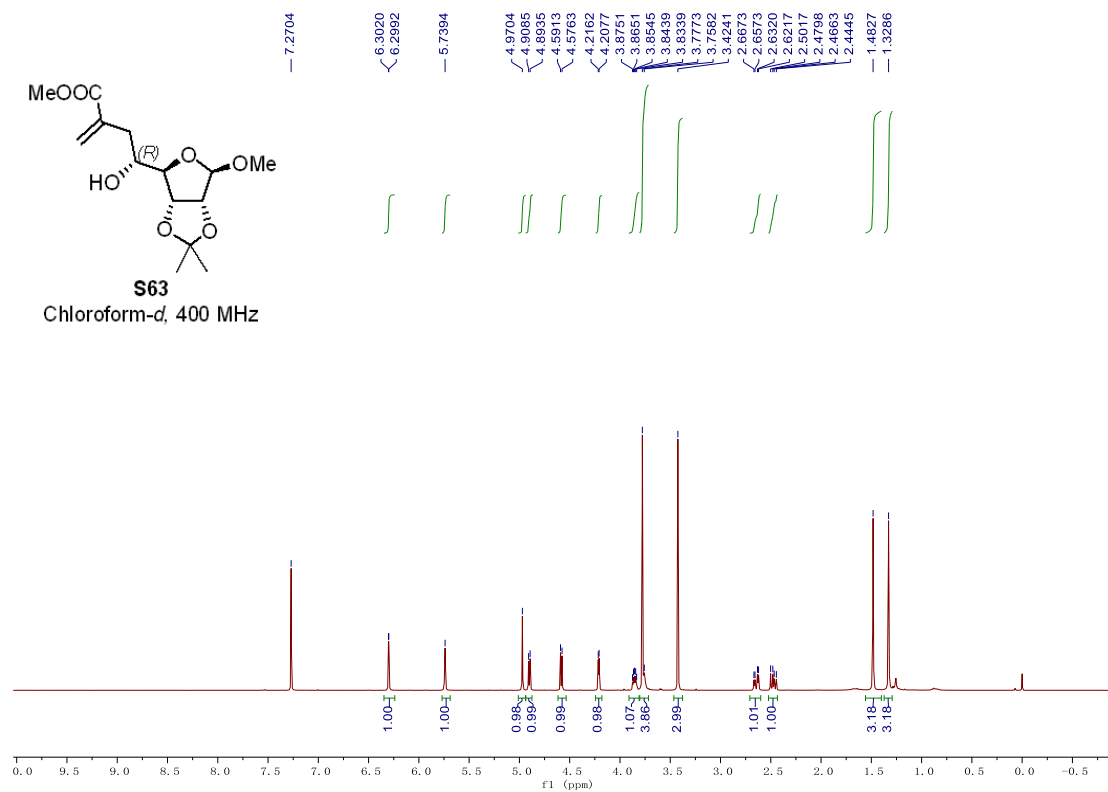

### $^1\text{H}$ NMR Spectra of compound S63

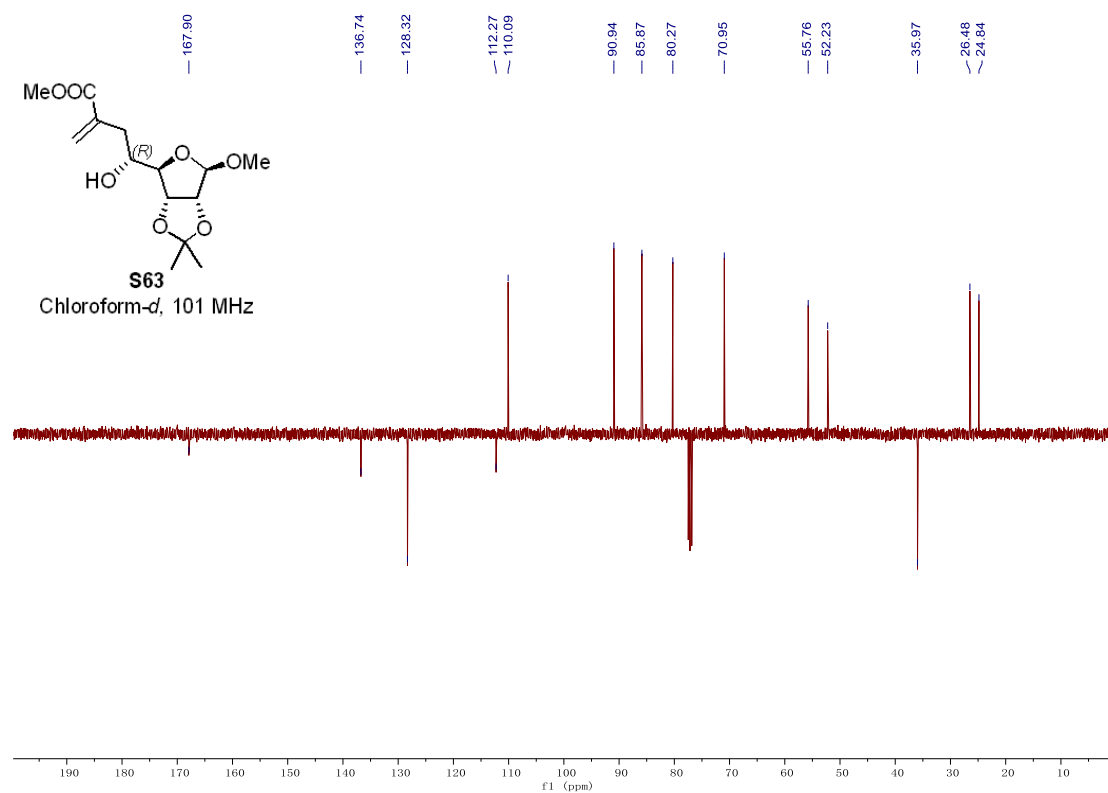

### $^{13}\text{C}$ NMR Spectra of compound S63

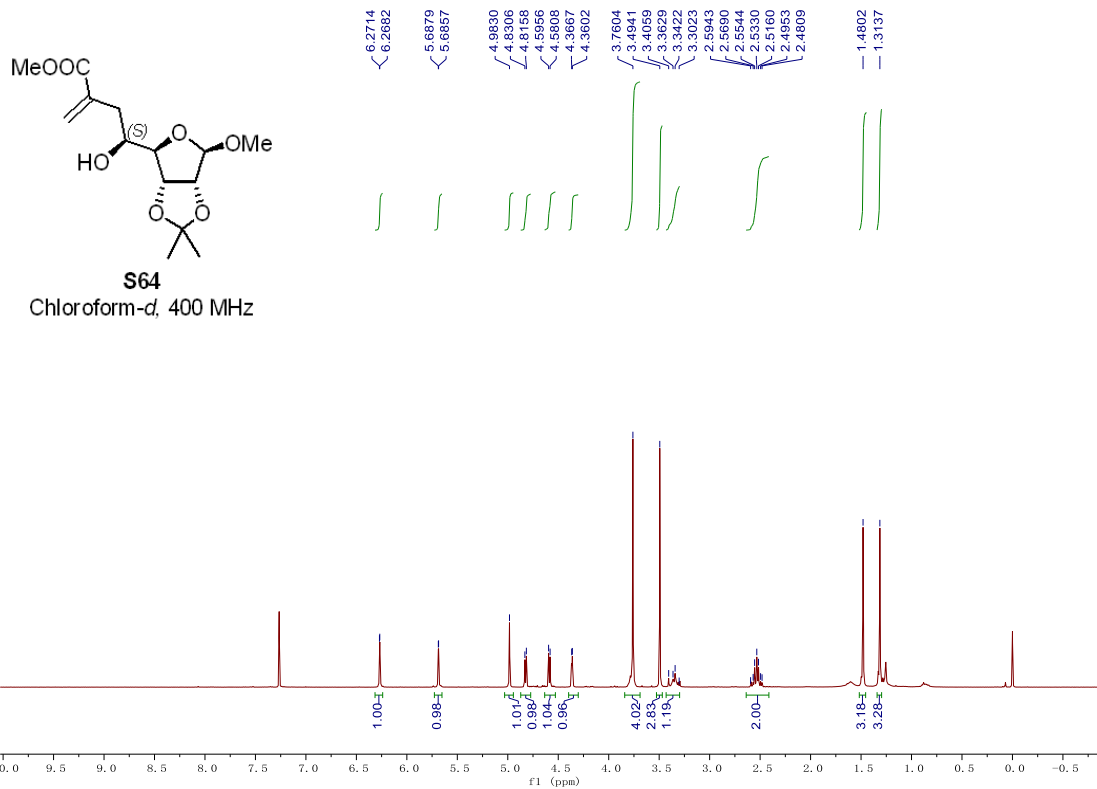

### <sup>1</sup>H NMR Spectra of compound S64

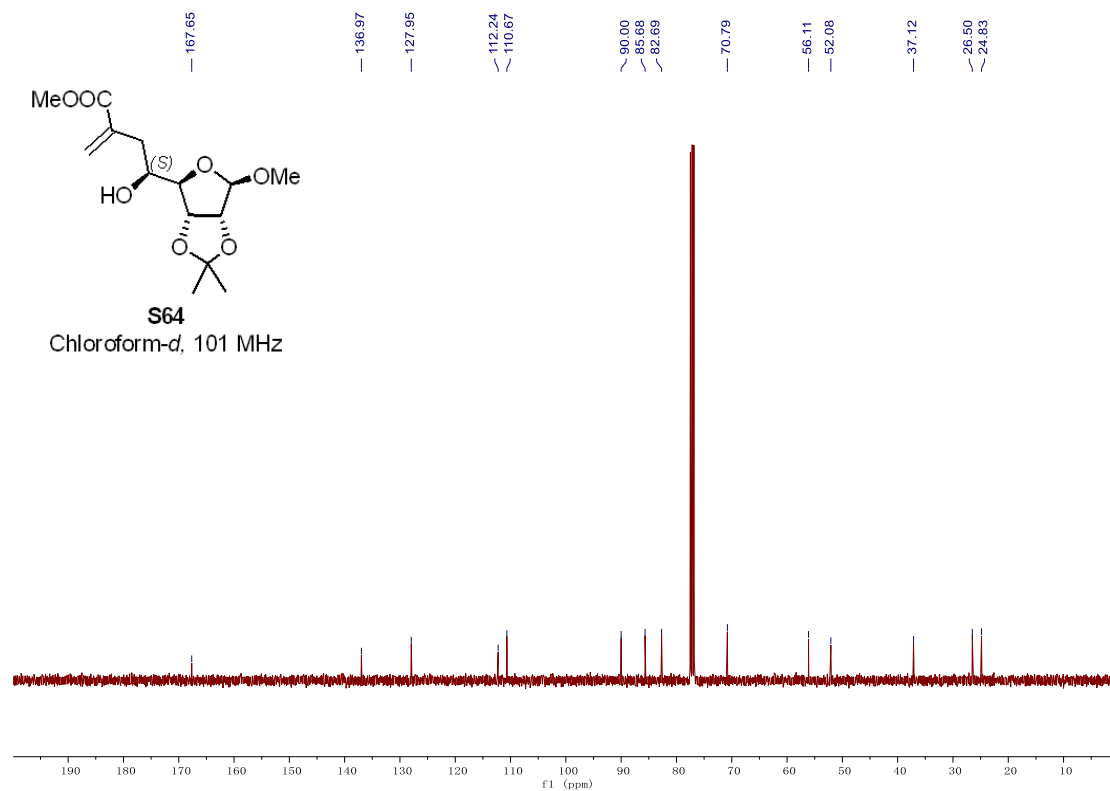

### <sup>13</sup>C NMR Spectra of compound S64

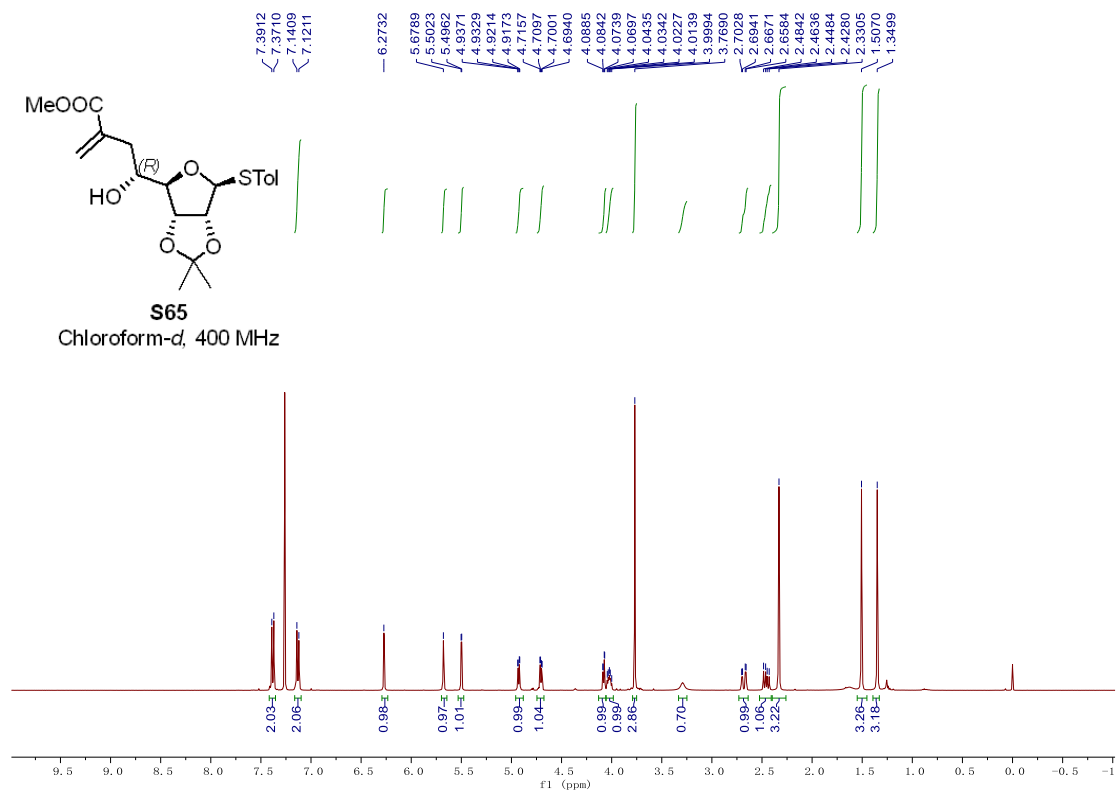

### $^1\text{H}$ NMR Spectra of compound S65

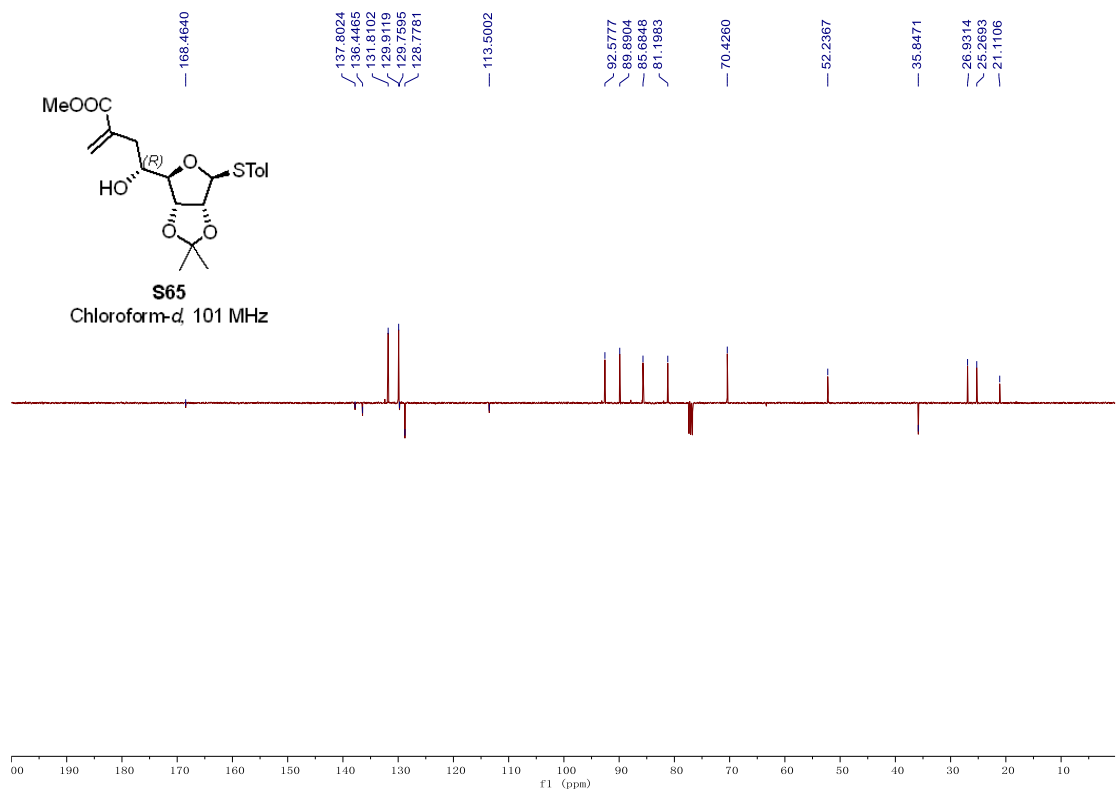

### $^{13}\text{C}$ NMR Spectra of compound S65

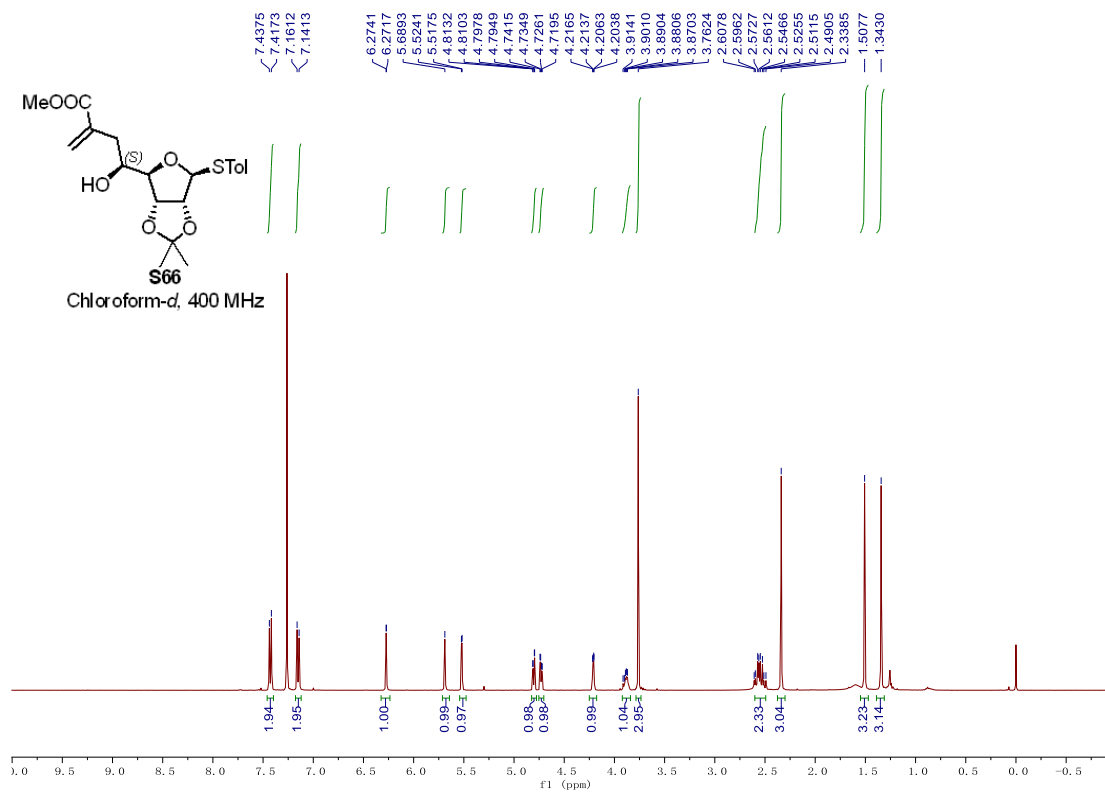

**$^1\text{H}$  NMR Spectra of compound S66**

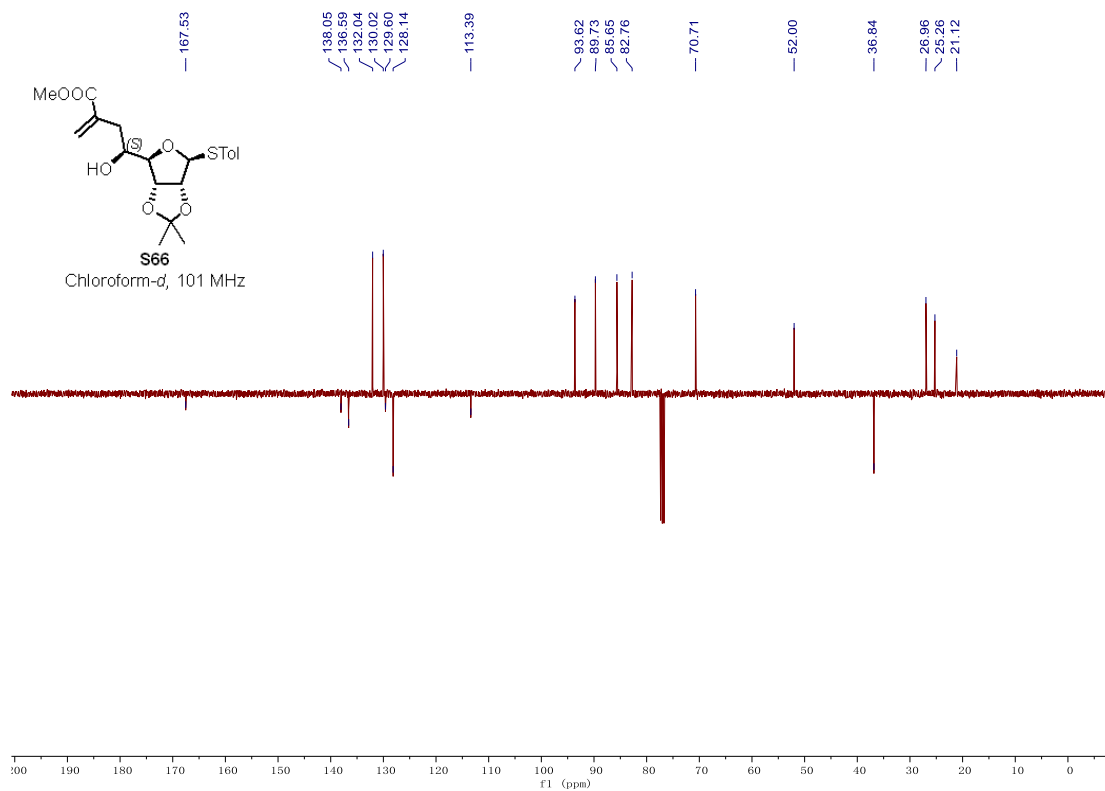

**$^{13}\text{C}$  NMR Spectra of compound S66**

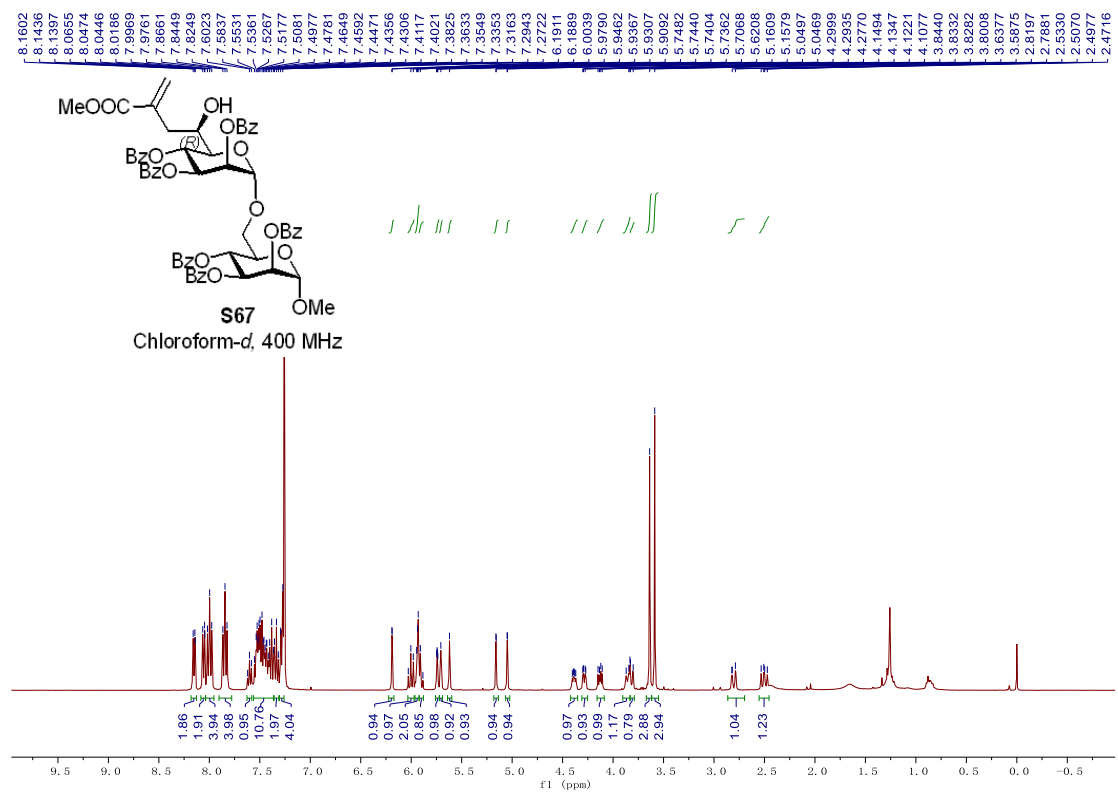

**$^1\text{H}$  NMR Spectra of compound S67**

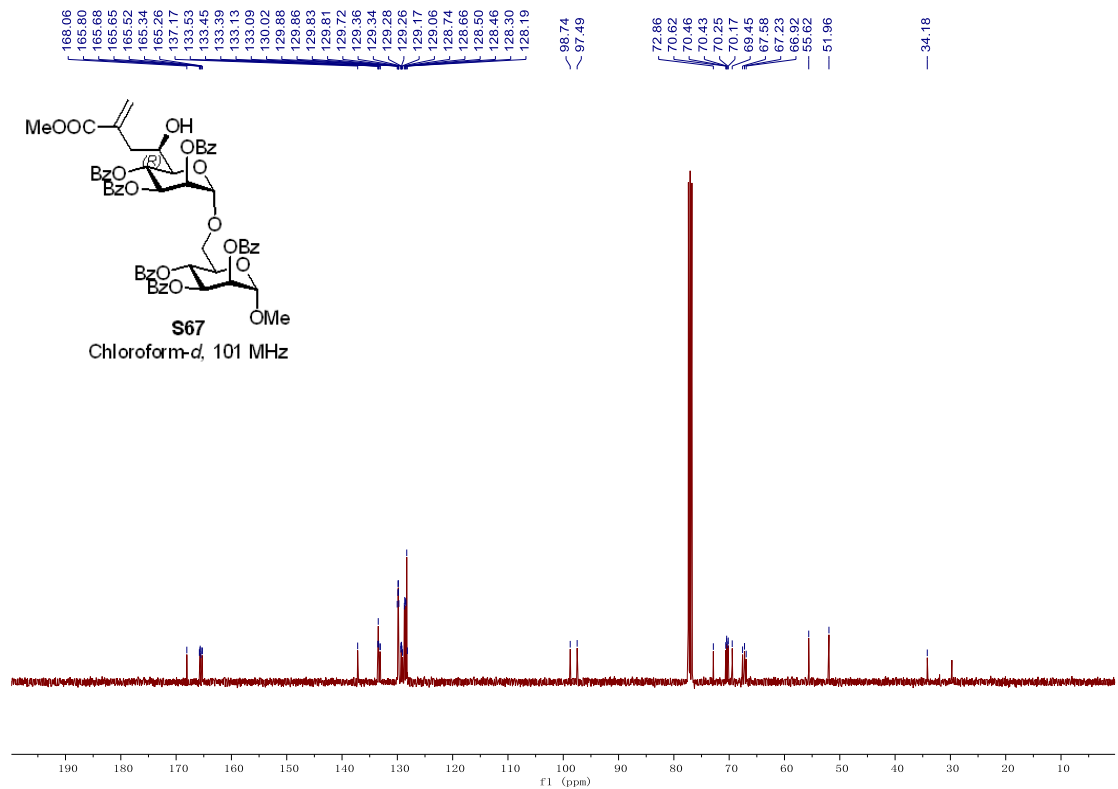

**$^{13}\text{C}$  NMR Spectra of compound S67**

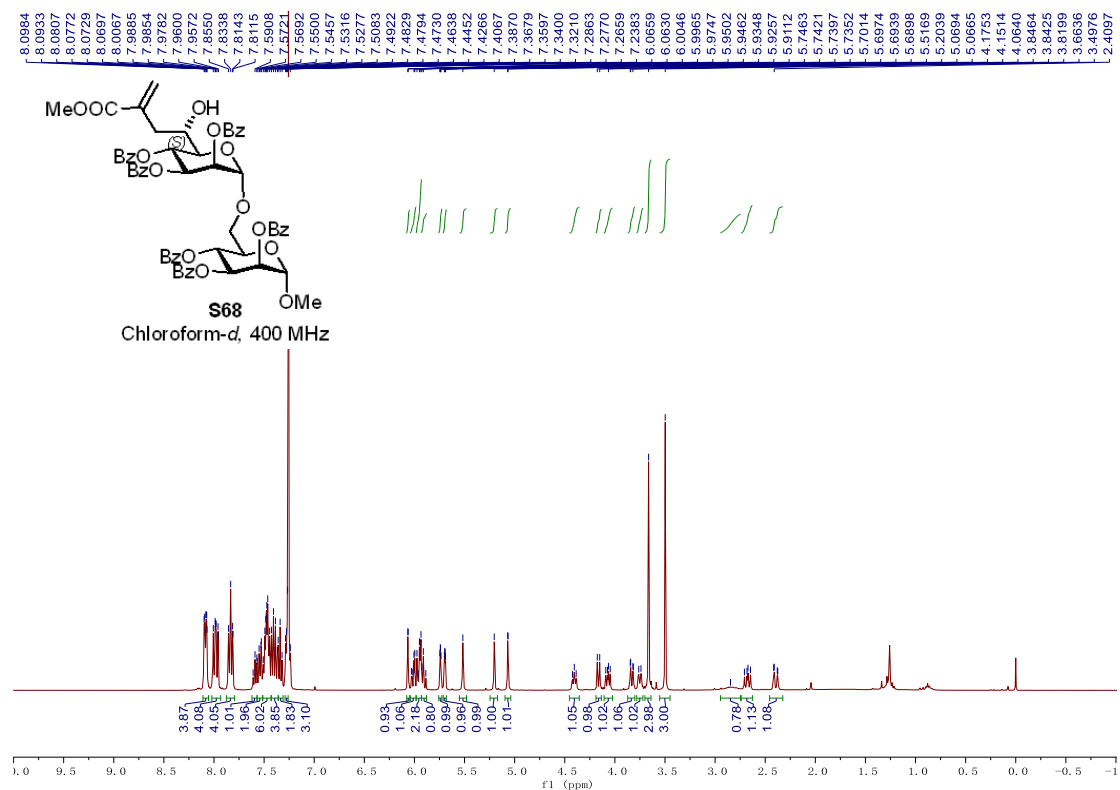

**$^1\text{H}$  NMR Spectra of compound S68**

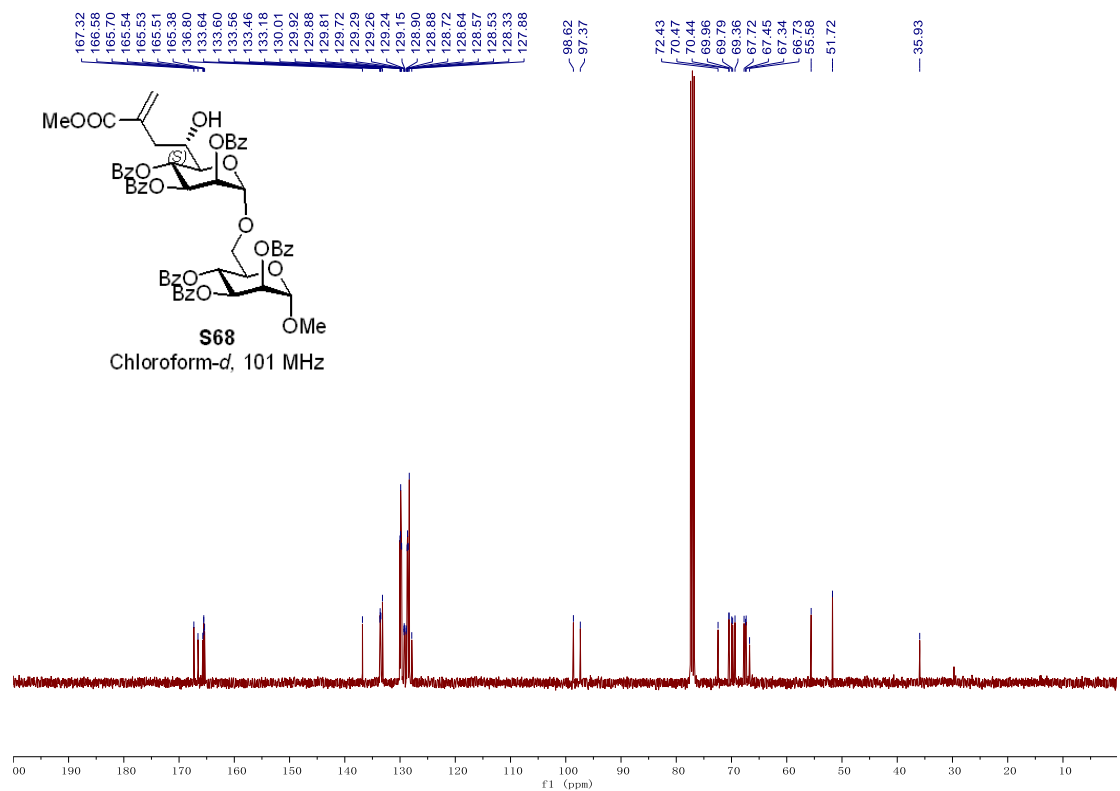

**$^{13}\text{C}$  NMR Spectra of compound S68**

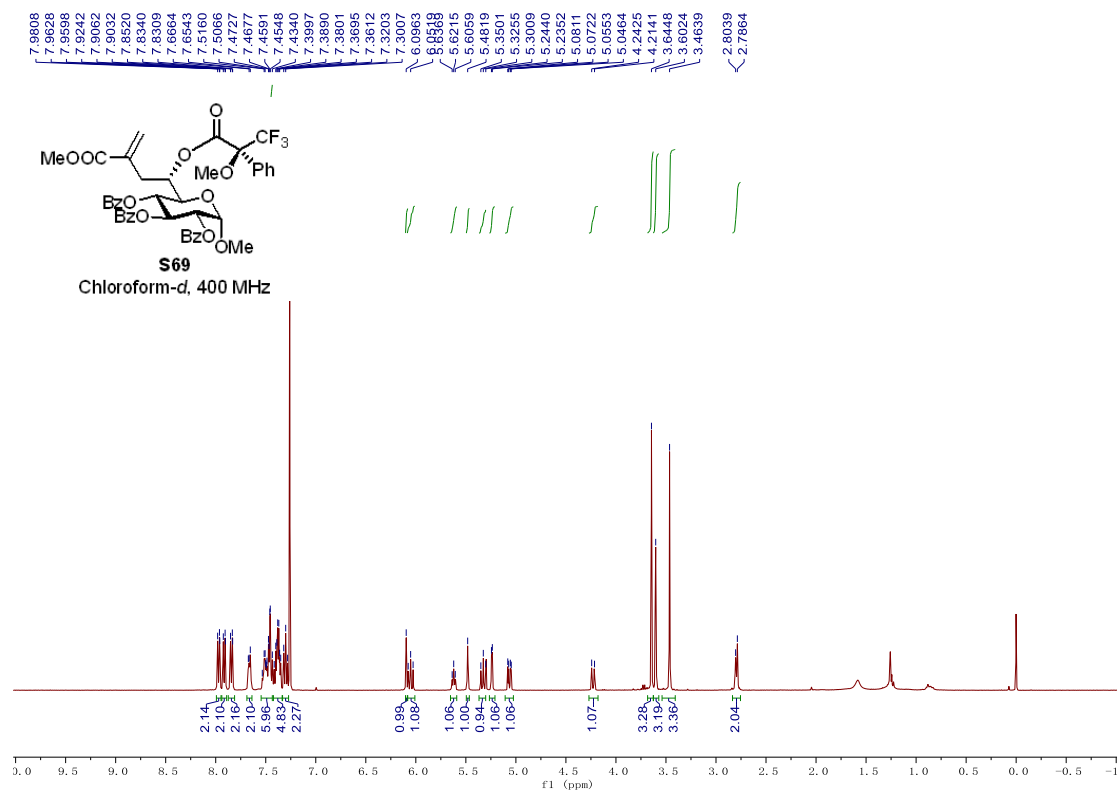

### <sup>1</sup>H NMR Spectra of compound S69

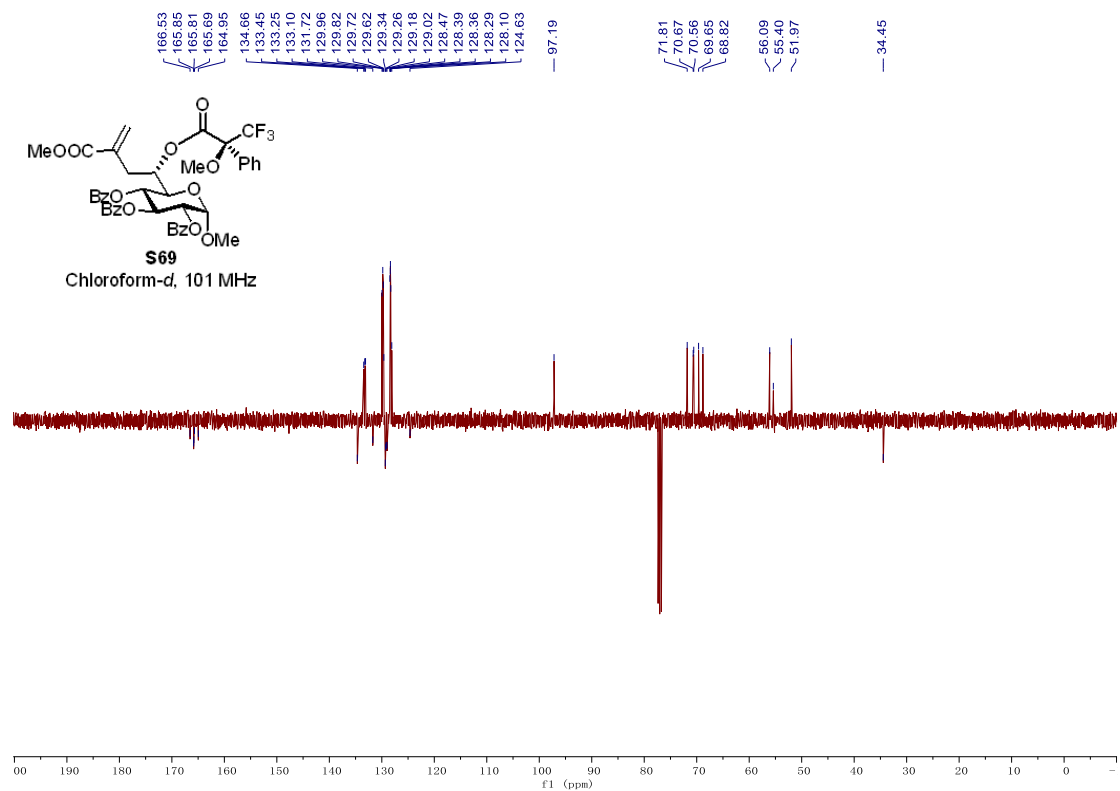

### <sup>13</sup>C NMR Spectra of compound S69





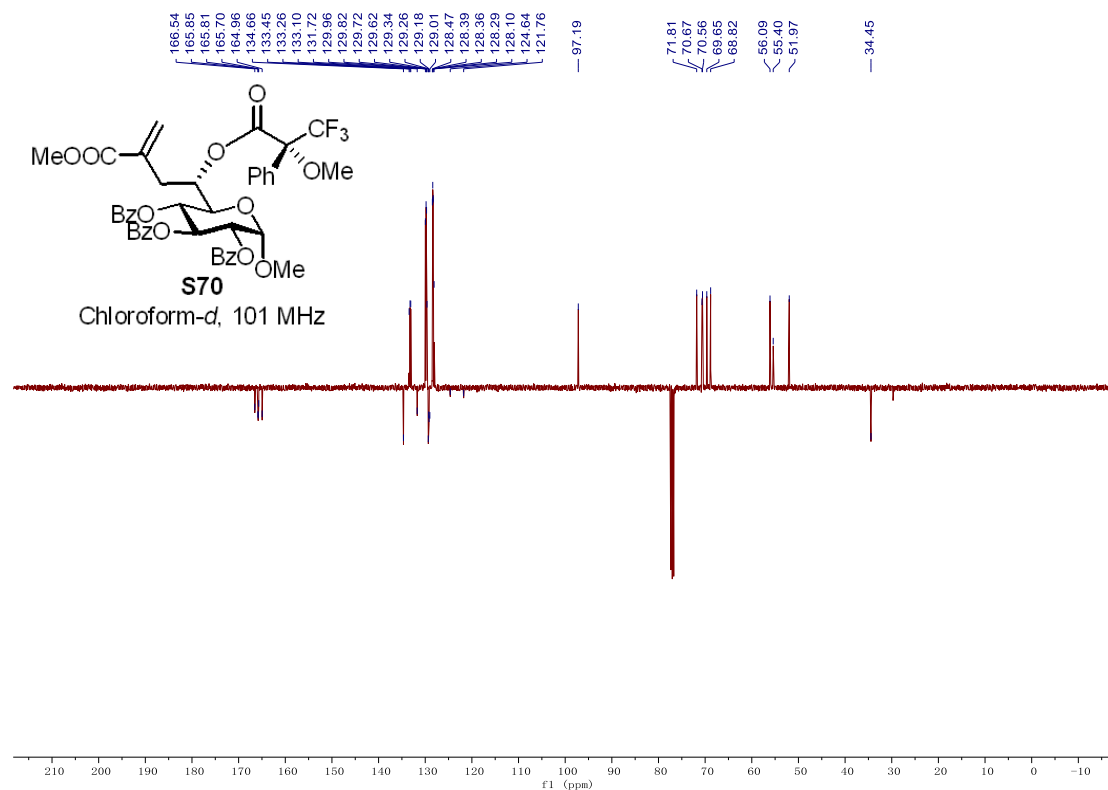

### <sup>13</sup>C NMR Spectra of compound S70

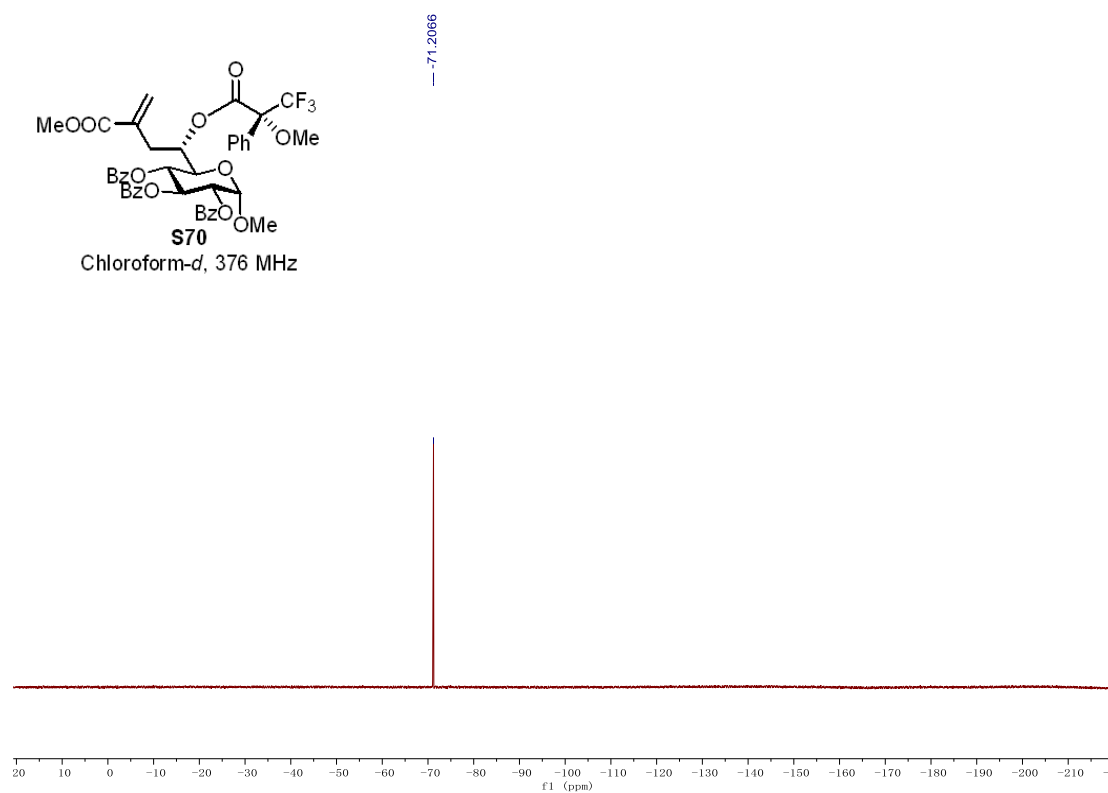

### <sup>19</sup>F NMR Spectra of compound S70

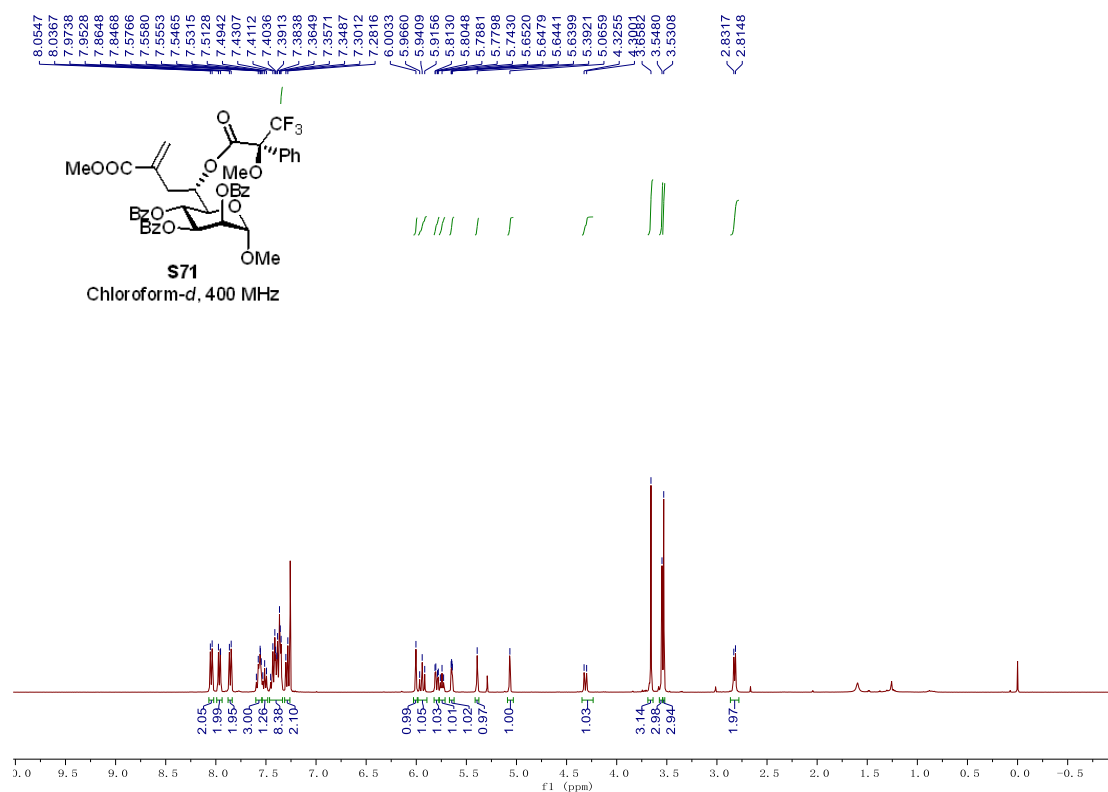

**<sup>1</sup>H NMR Spectra of compound S71**

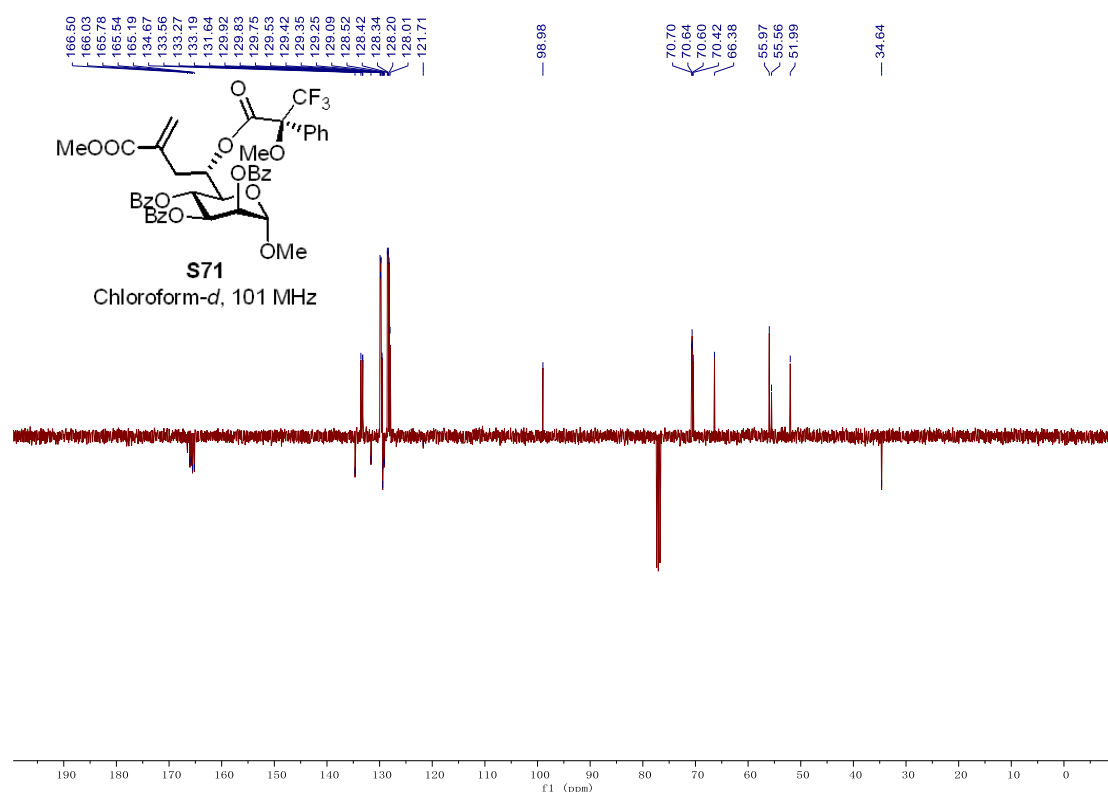

**<sup>13</sup>C NMR Spectra of compound S71**

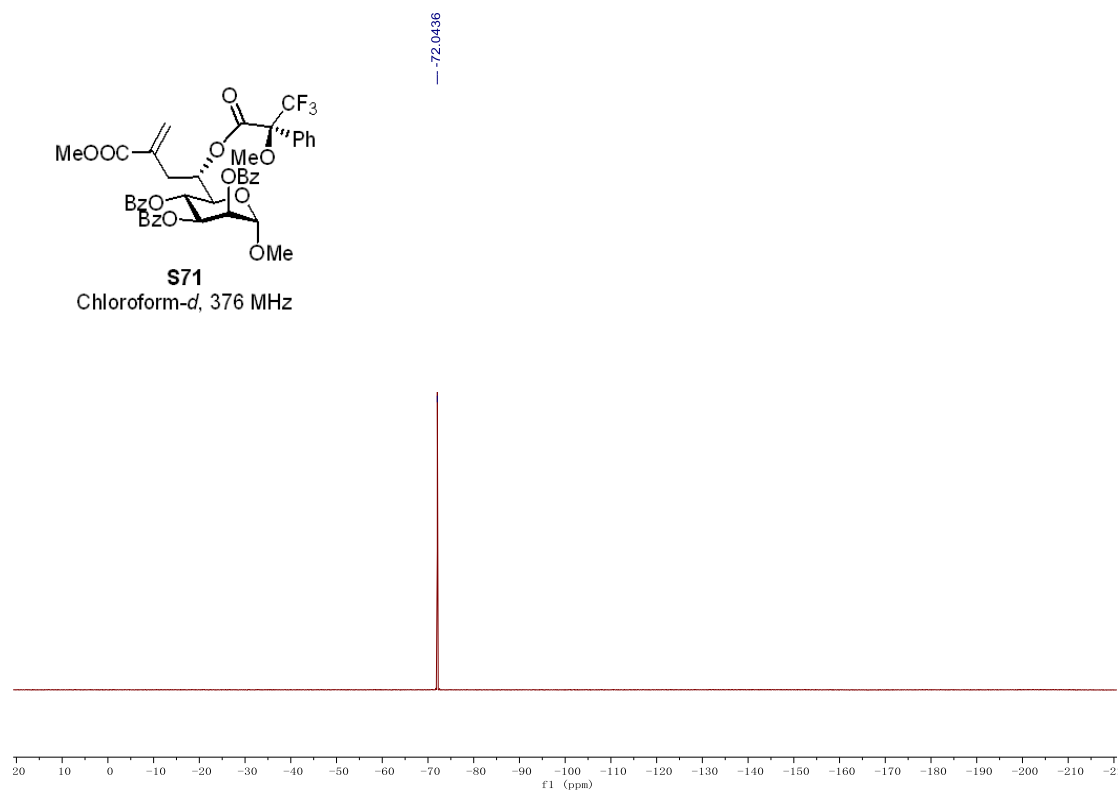

### <sup>19</sup>F NMR Spectra of compound S71

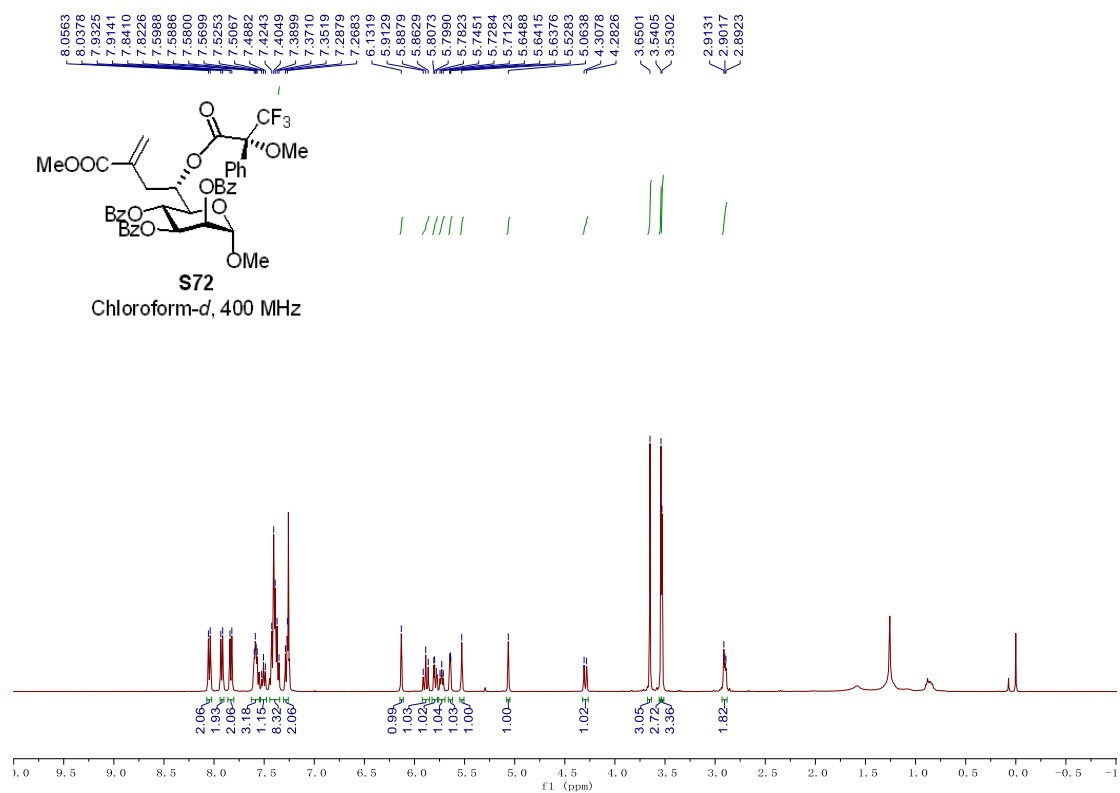

### <sup>1</sup>H NMR Spectra of compound S72

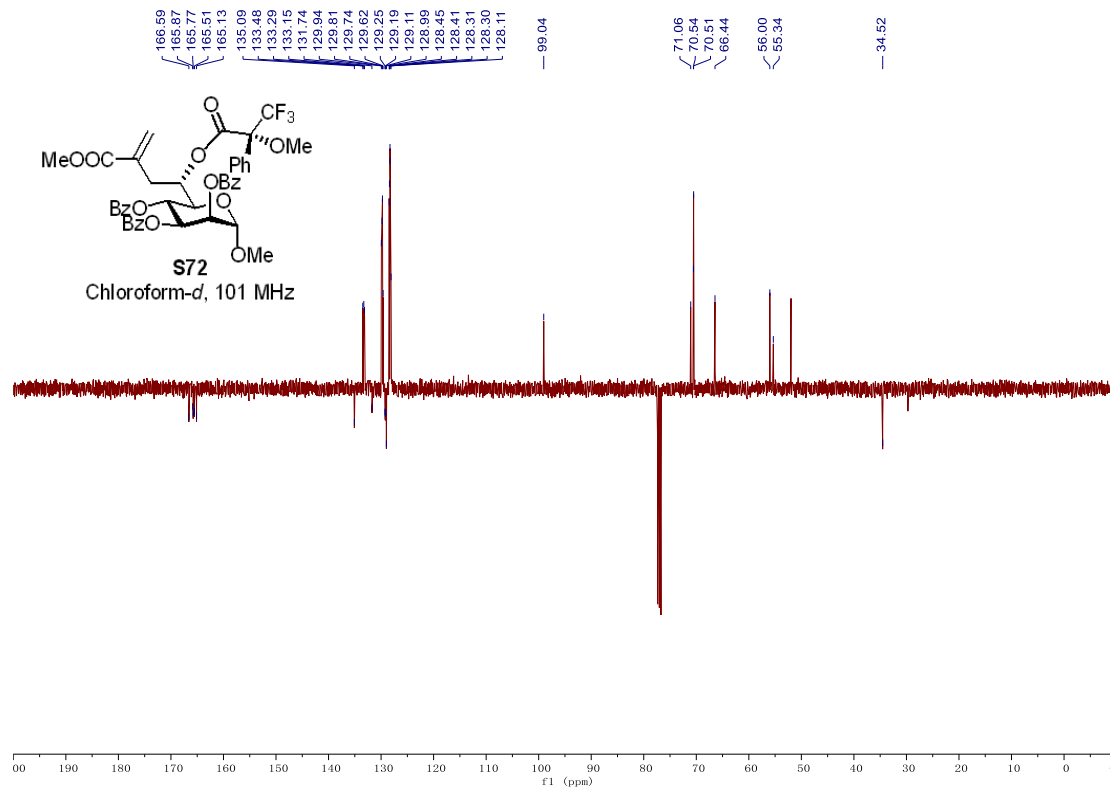

### <sup>13</sup>C NMR Spectra of compound S72

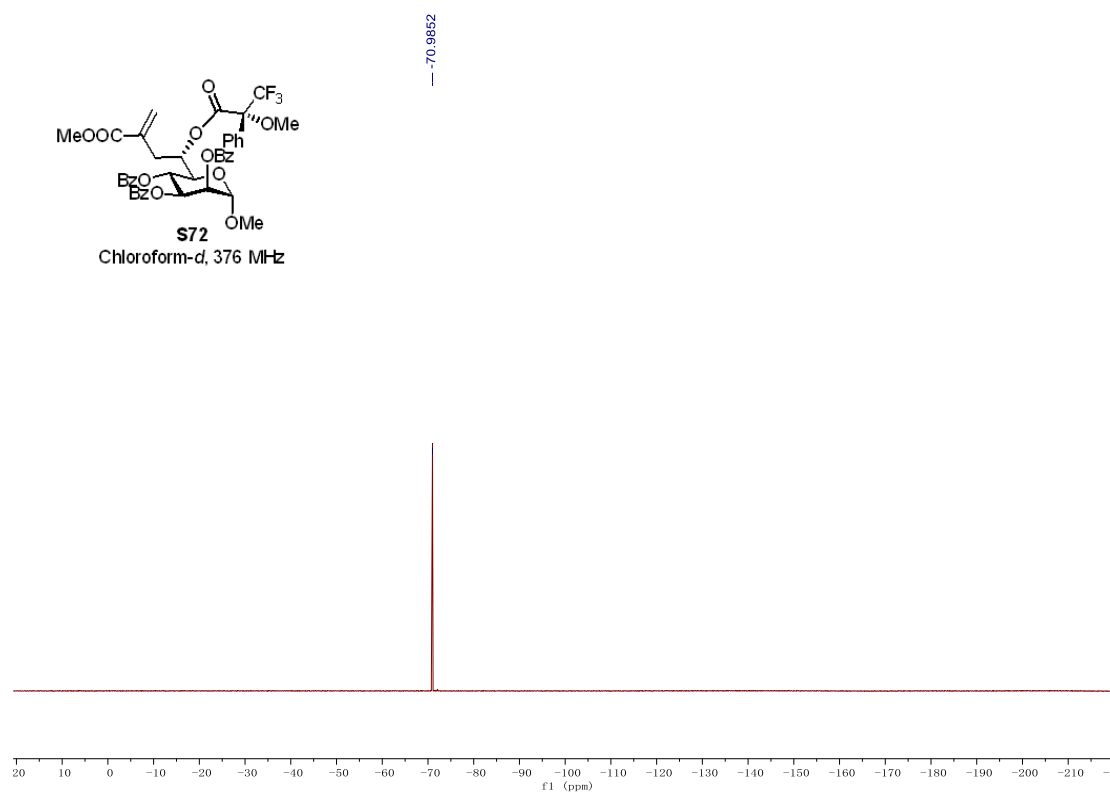

### <sup>19</sup>F NMR Spectra of compound S72

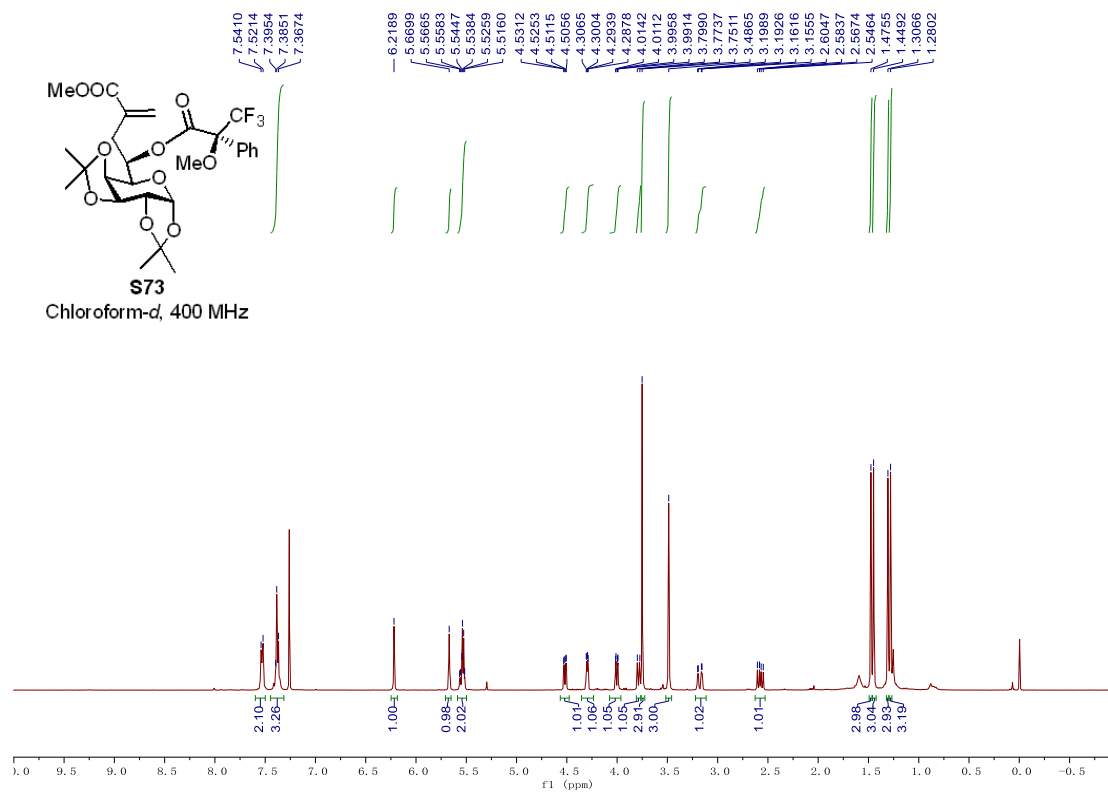

### <sup>1</sup>H NMR Spectra of compound S73

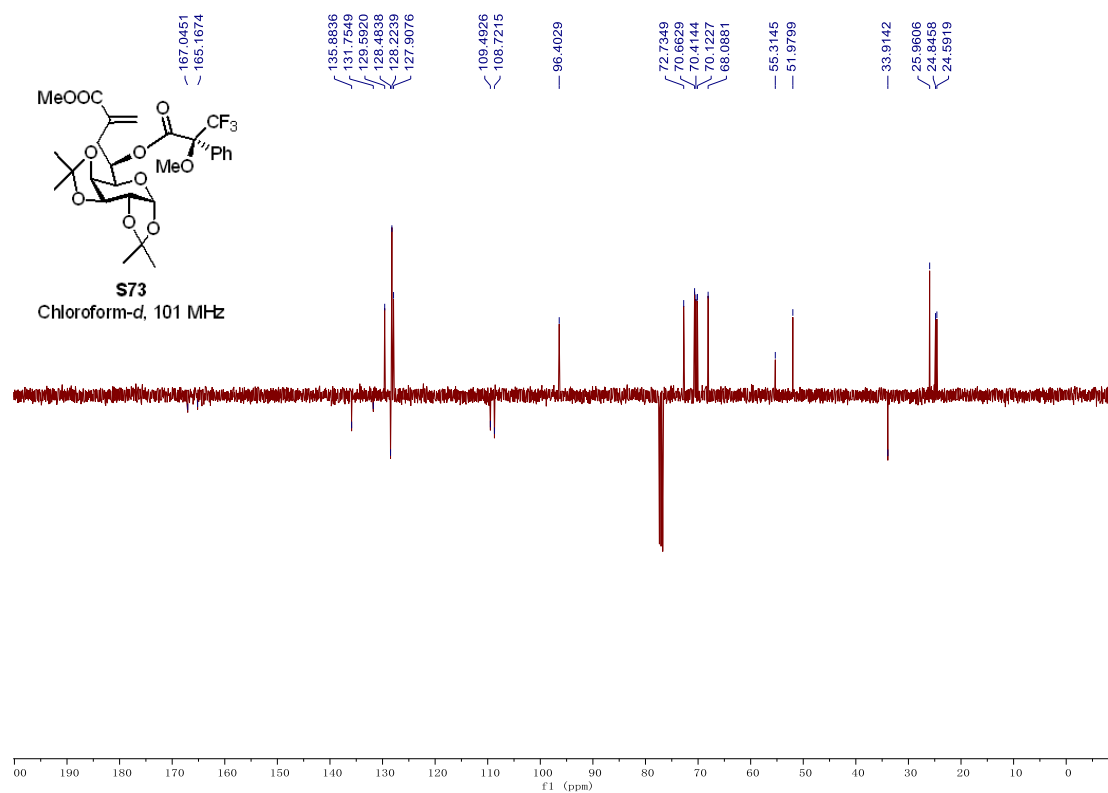

### <sup>13</sup>C NMR Spectra of compound S73

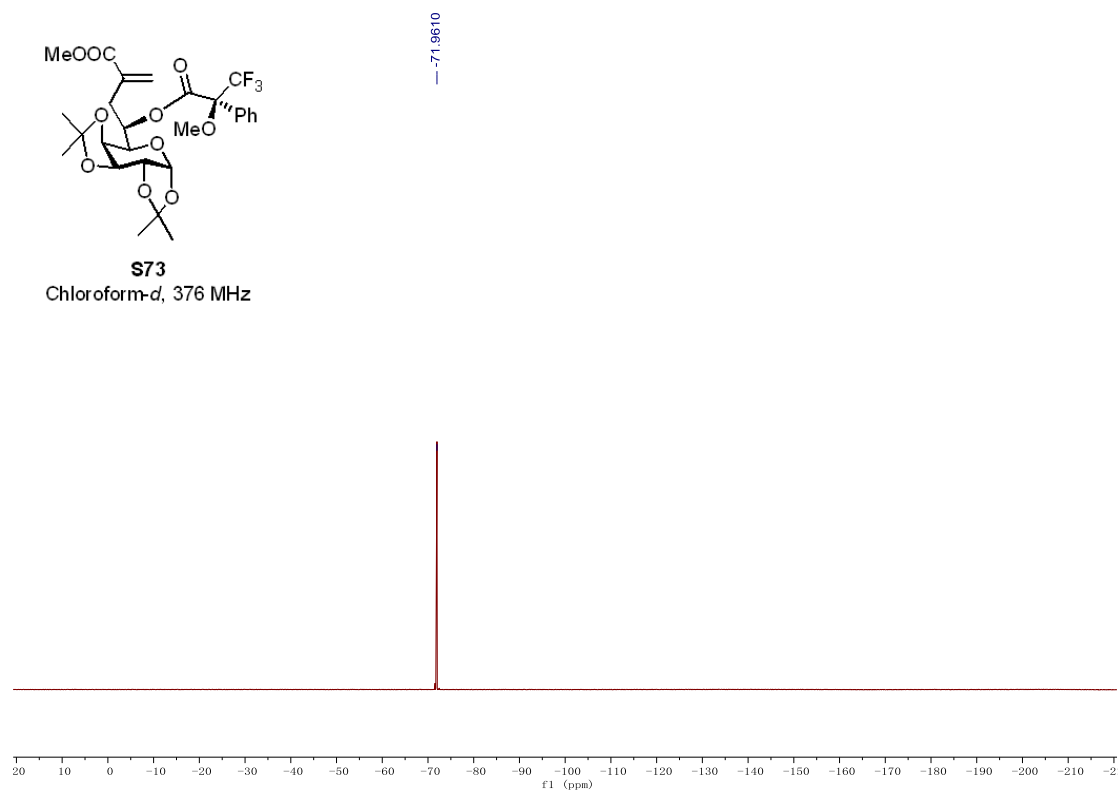

### $^{19}\text{F}$ NMR Spectra of compound S73

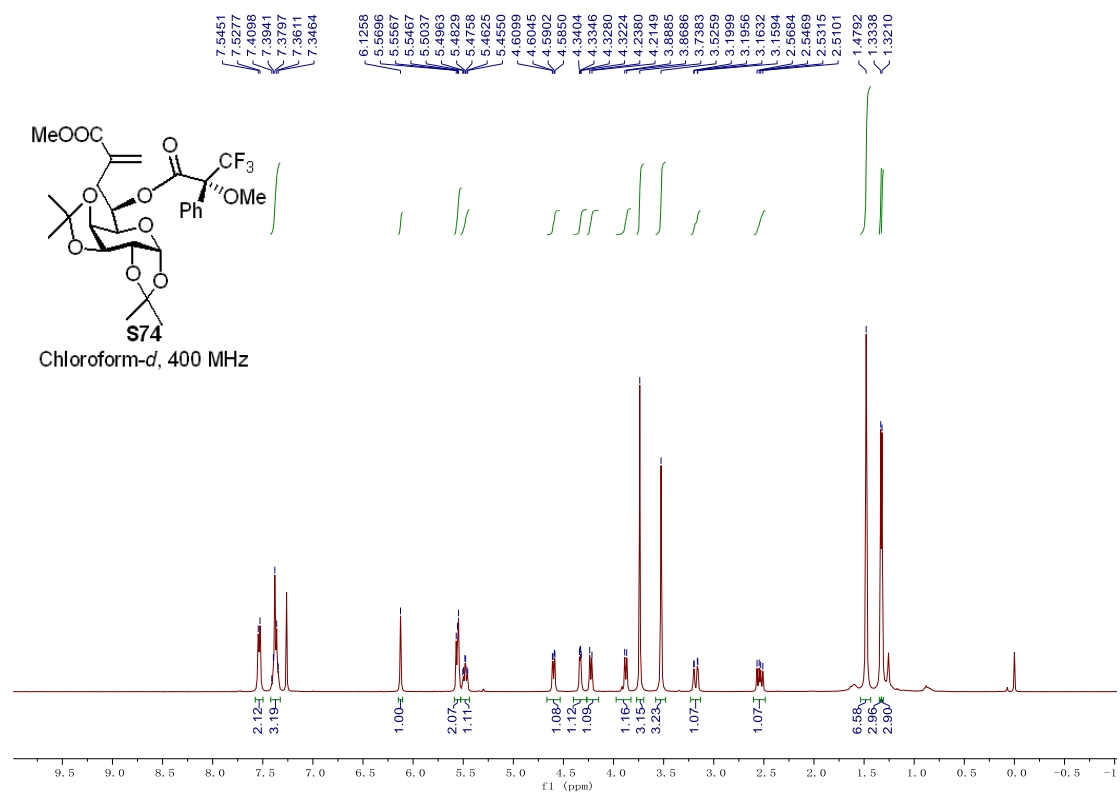

### $^1\text{H}$ NMR Spectra of compound S74

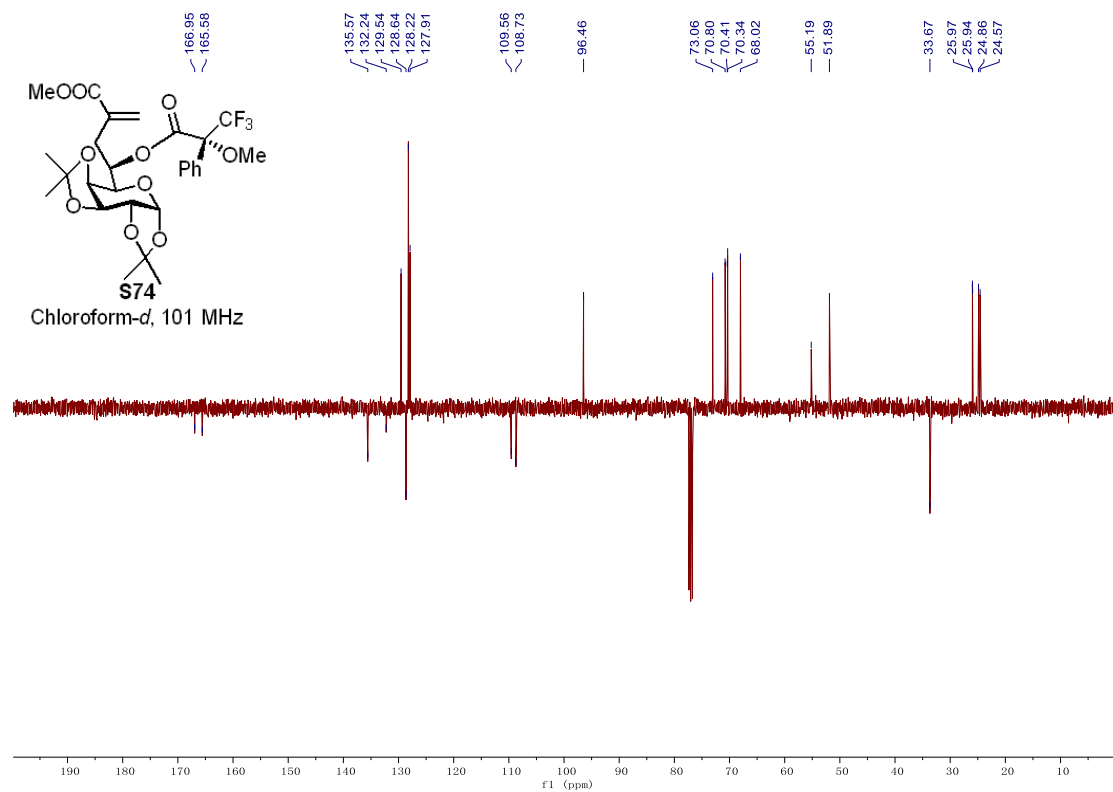

### <sup>13</sup>C NMR Spectra of compound S74

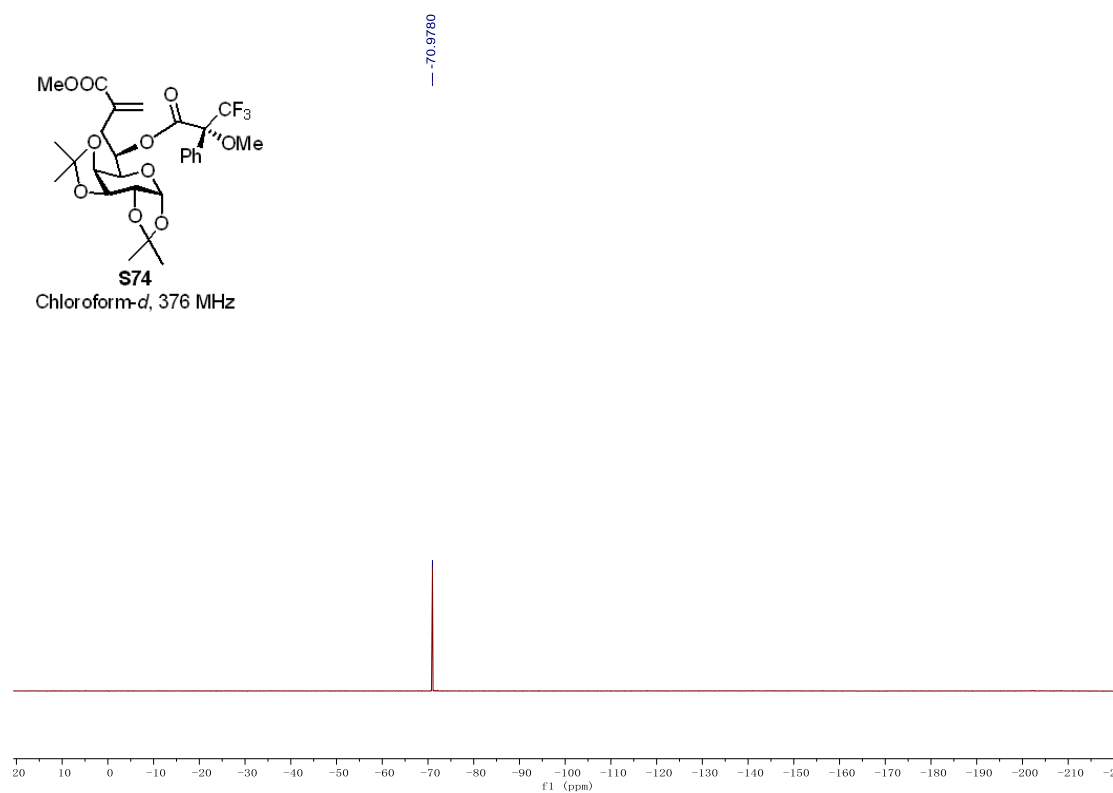

### <sup>19</sup>F NMR Spectra of compound S74



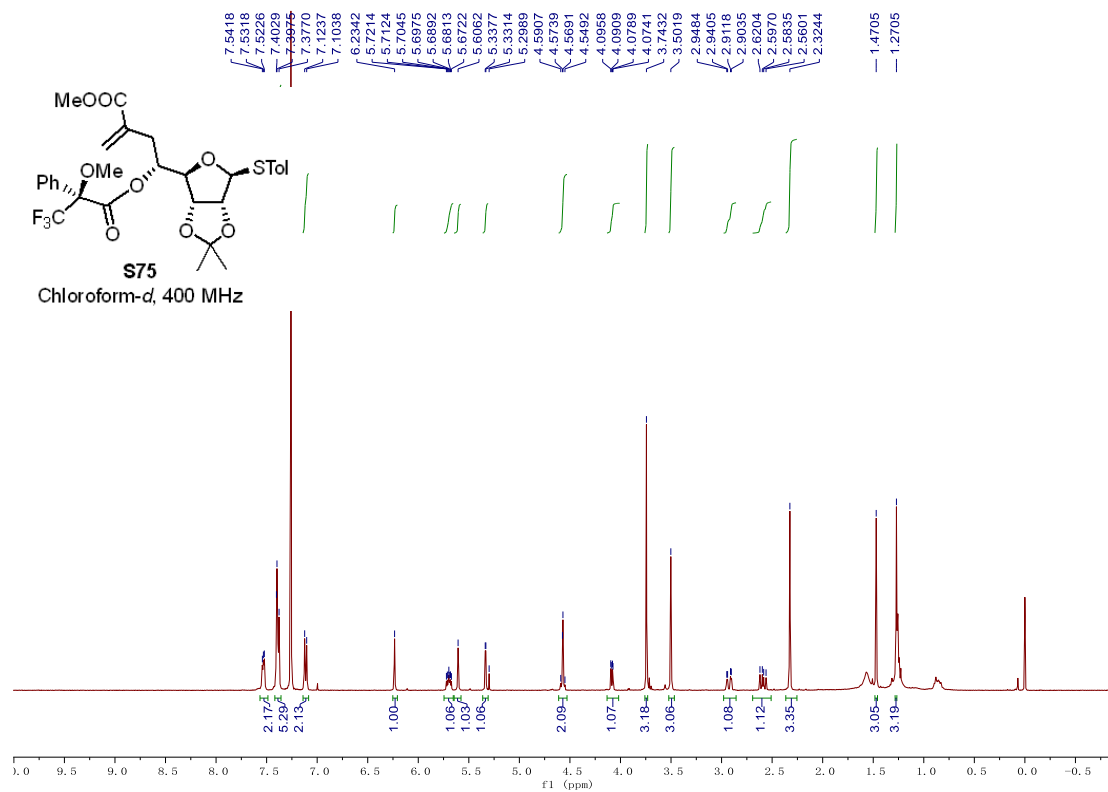

### <sup>1</sup>H NMR Spectra of compound **S75**

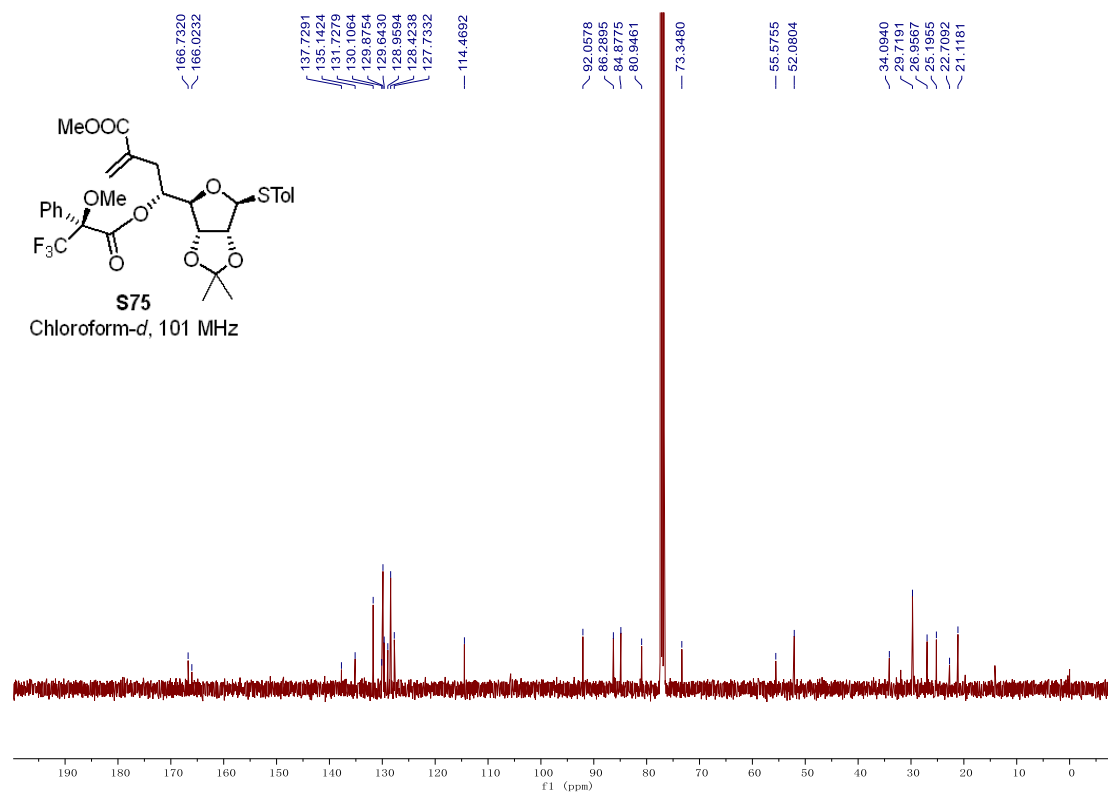

### <sup>13</sup>C NMR Spectra of compound **S75**

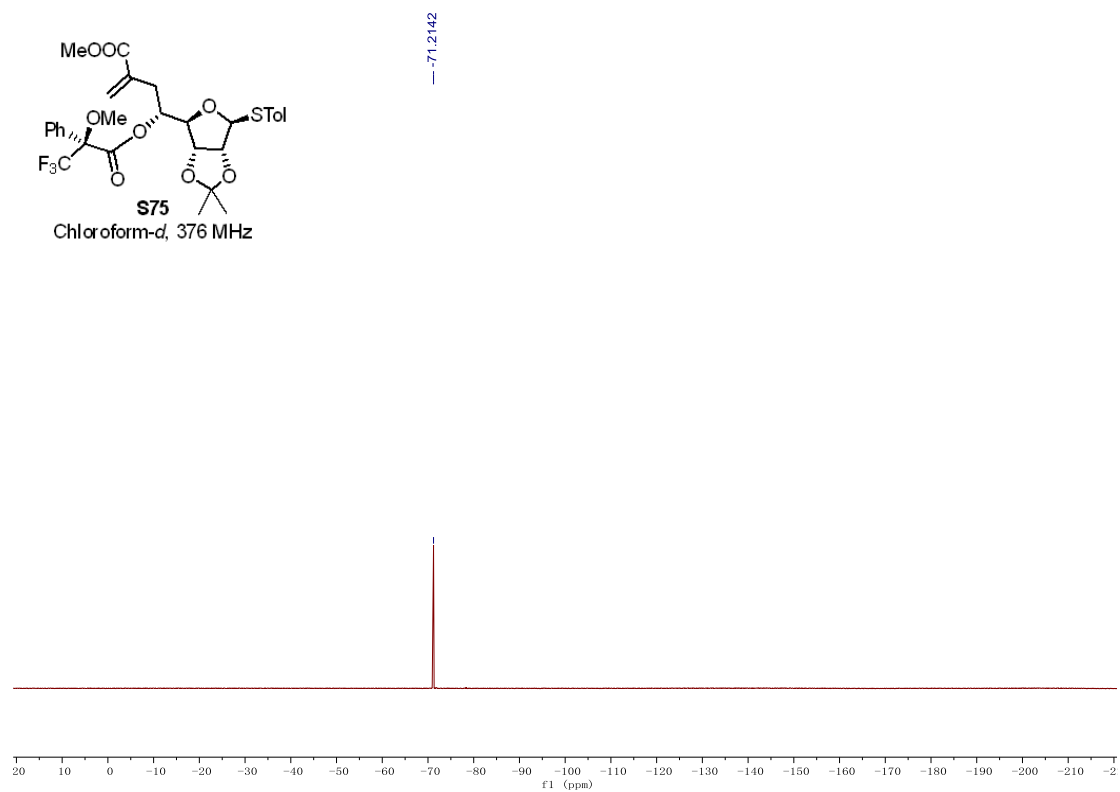

### <sup>19</sup>F NMR Spectra of compound S75

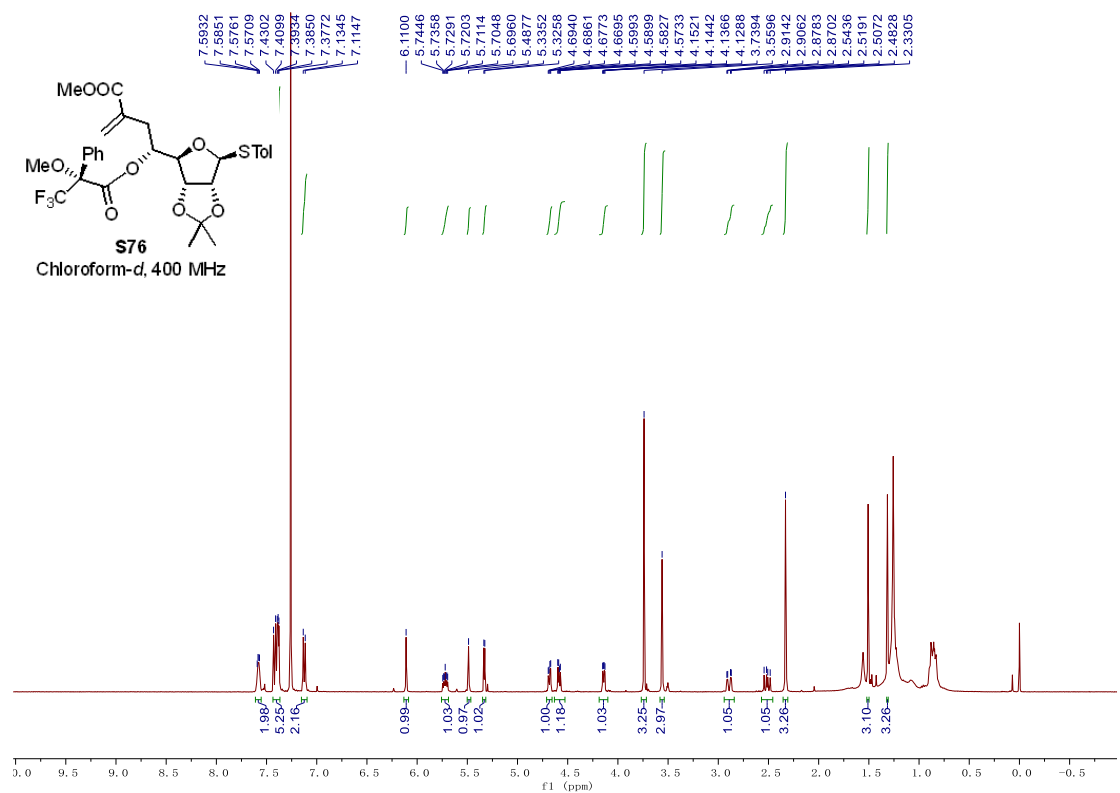

### <sup>1</sup>H NMR Spectra of compound S76

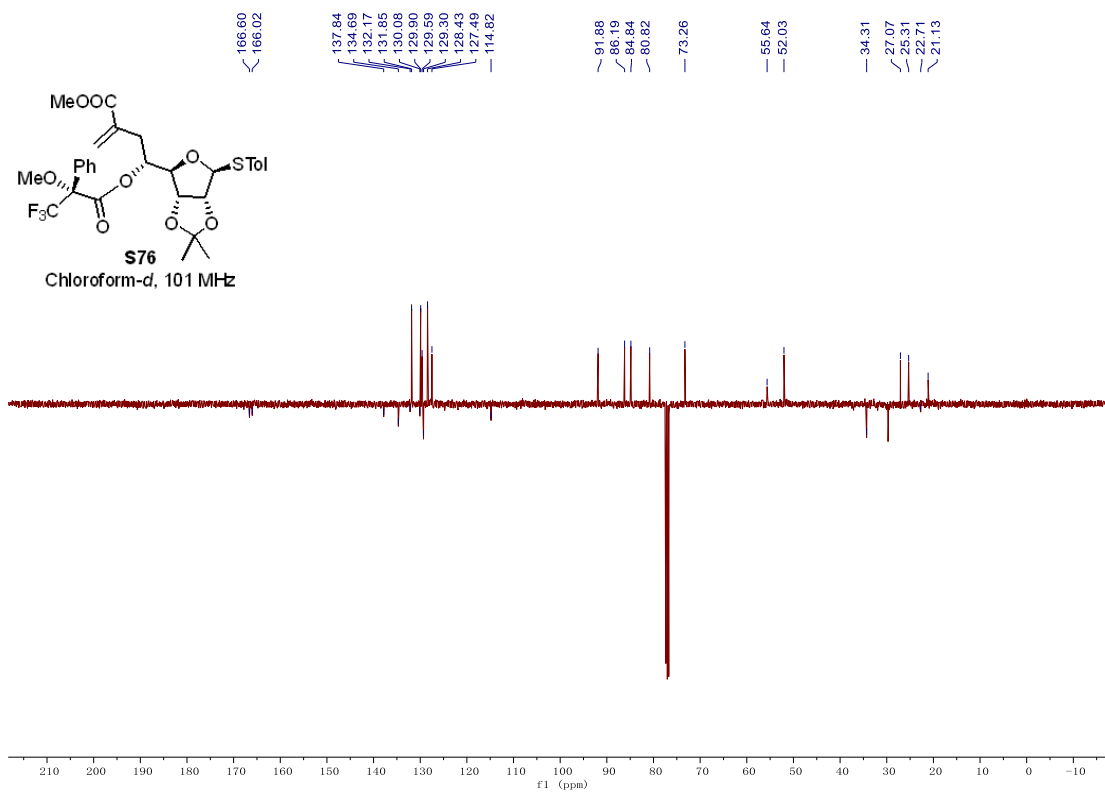

### $^{13}\text{C}$ NMR Spectra of compound S76

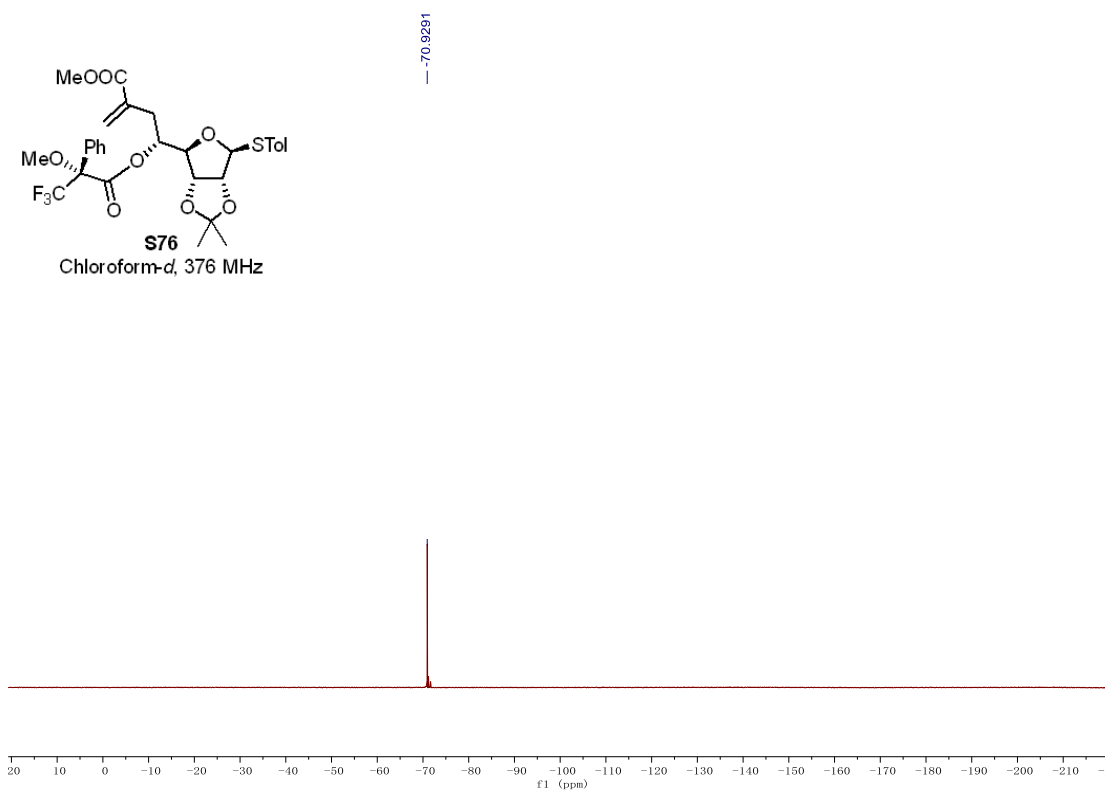

### $^{19}\text{F}$ NMR Spectra of compound S76

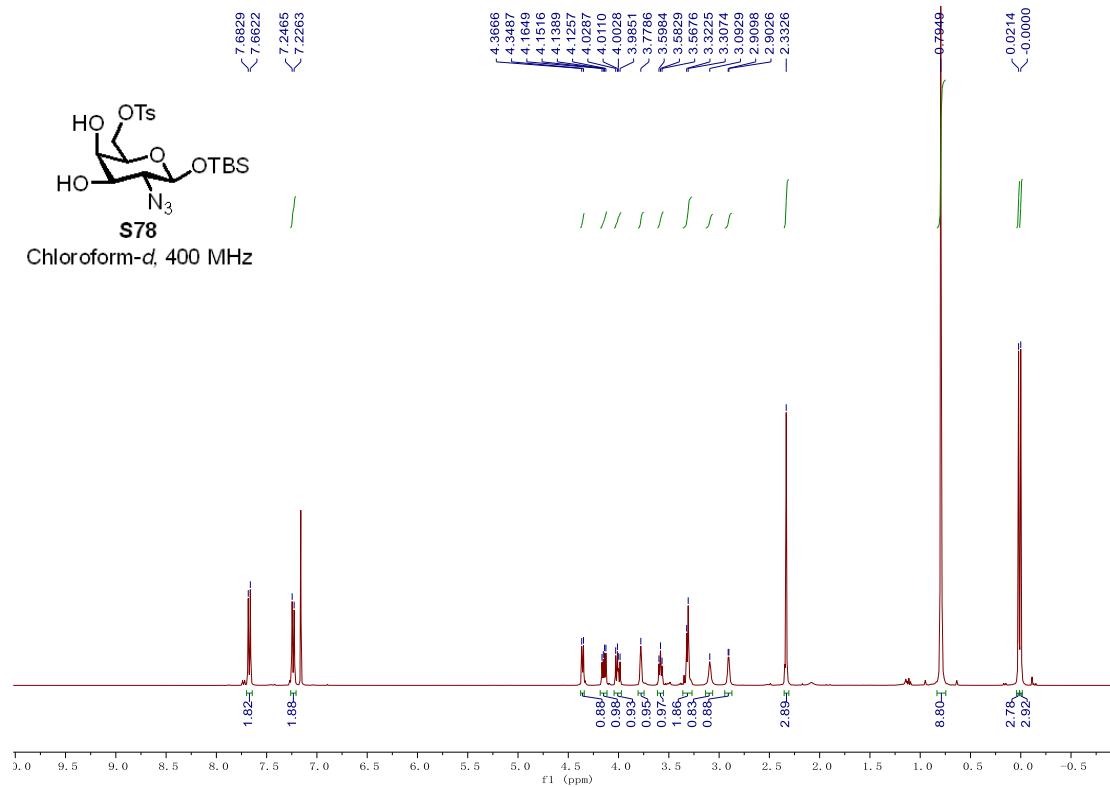

### <sup>1</sup>H NMR Spectra of compound S78

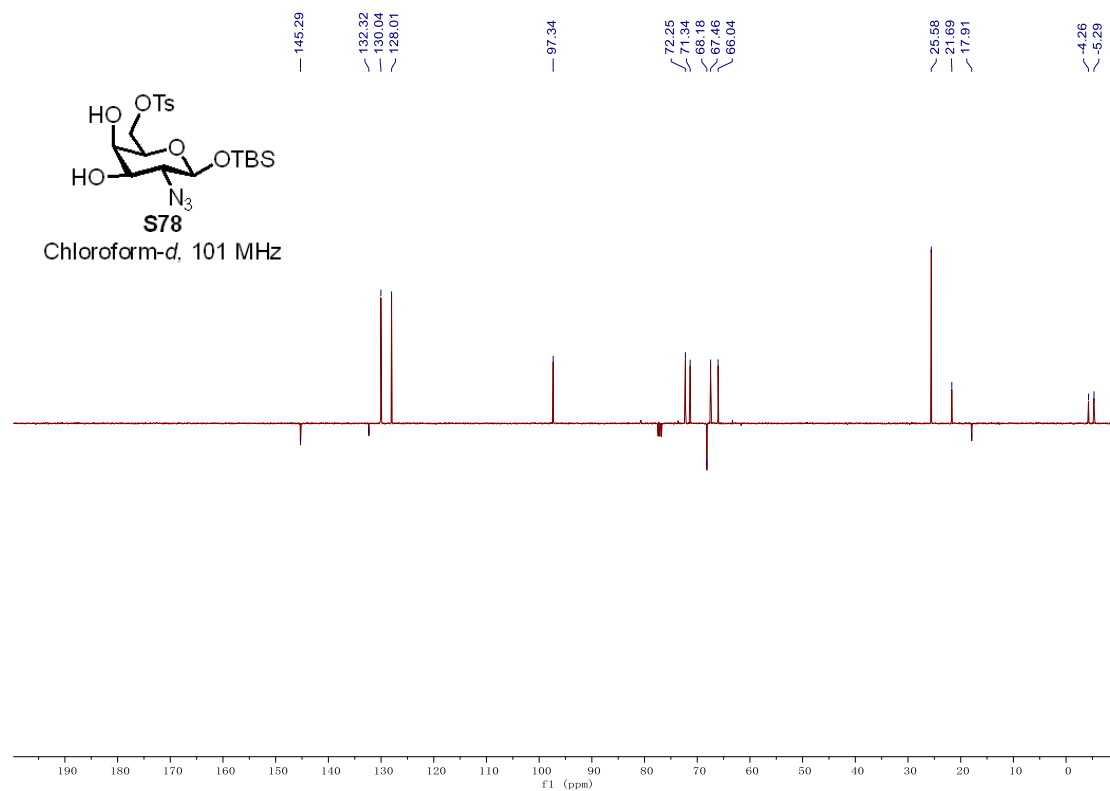

### <sup>13</sup>C NMR Spectra of compound S78

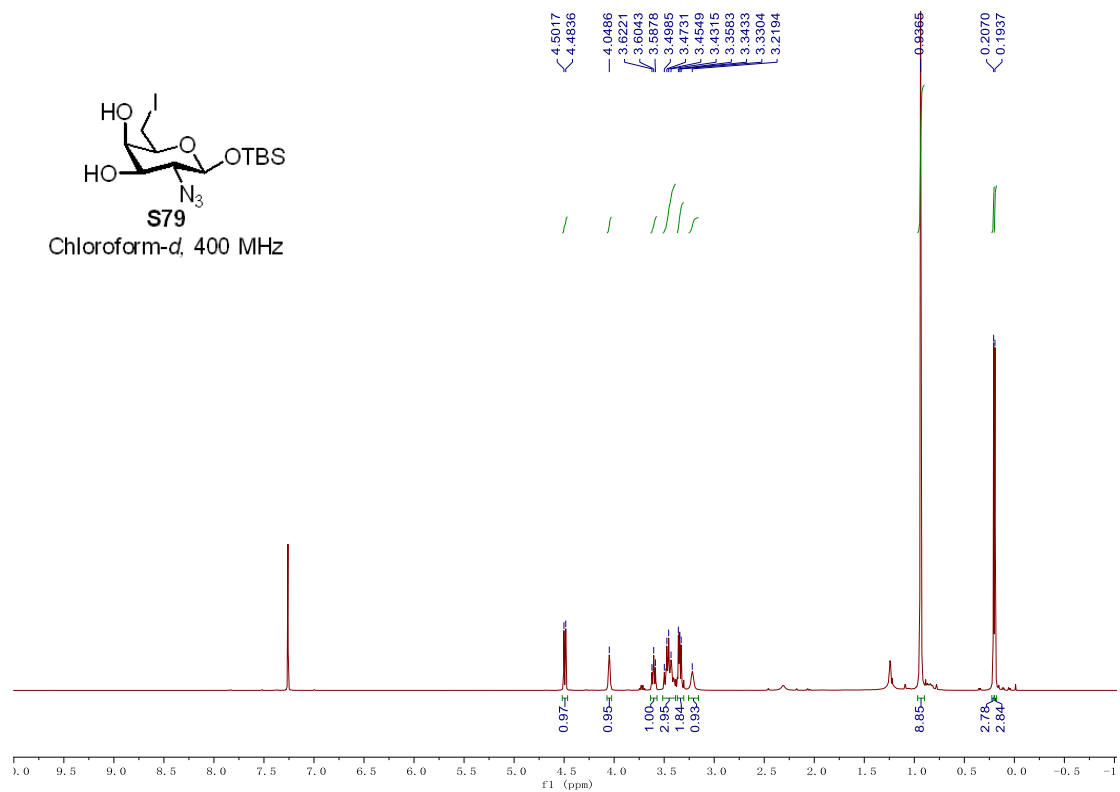

### <sup>1</sup>H NMR Spectra of compound S79

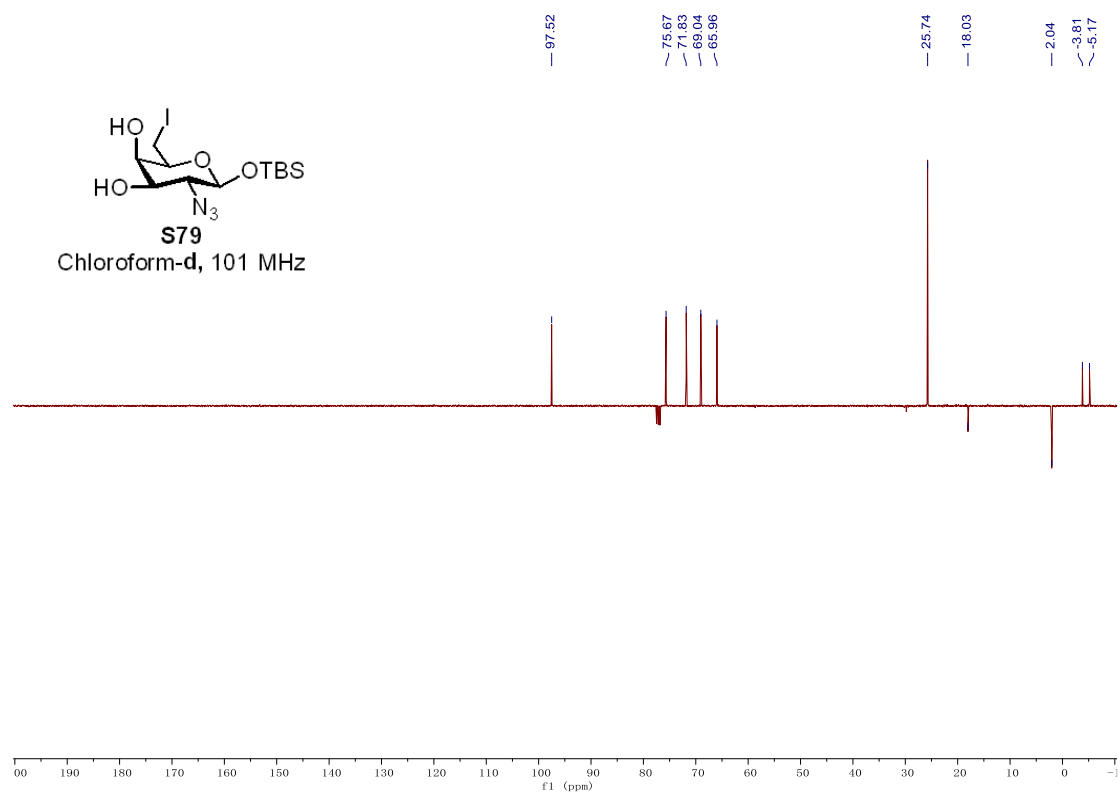

### <sup>13</sup>C NMR Spectra of compound S79

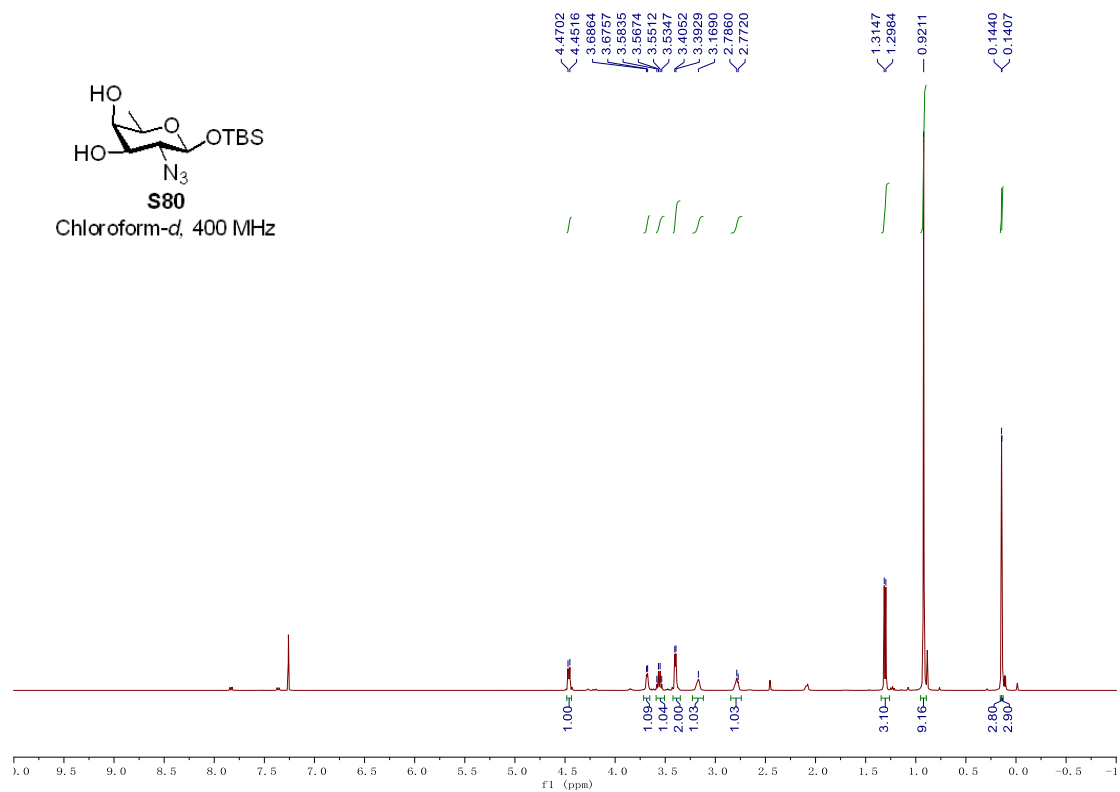

### <sup>1</sup>H NMR Spectra of compound S80

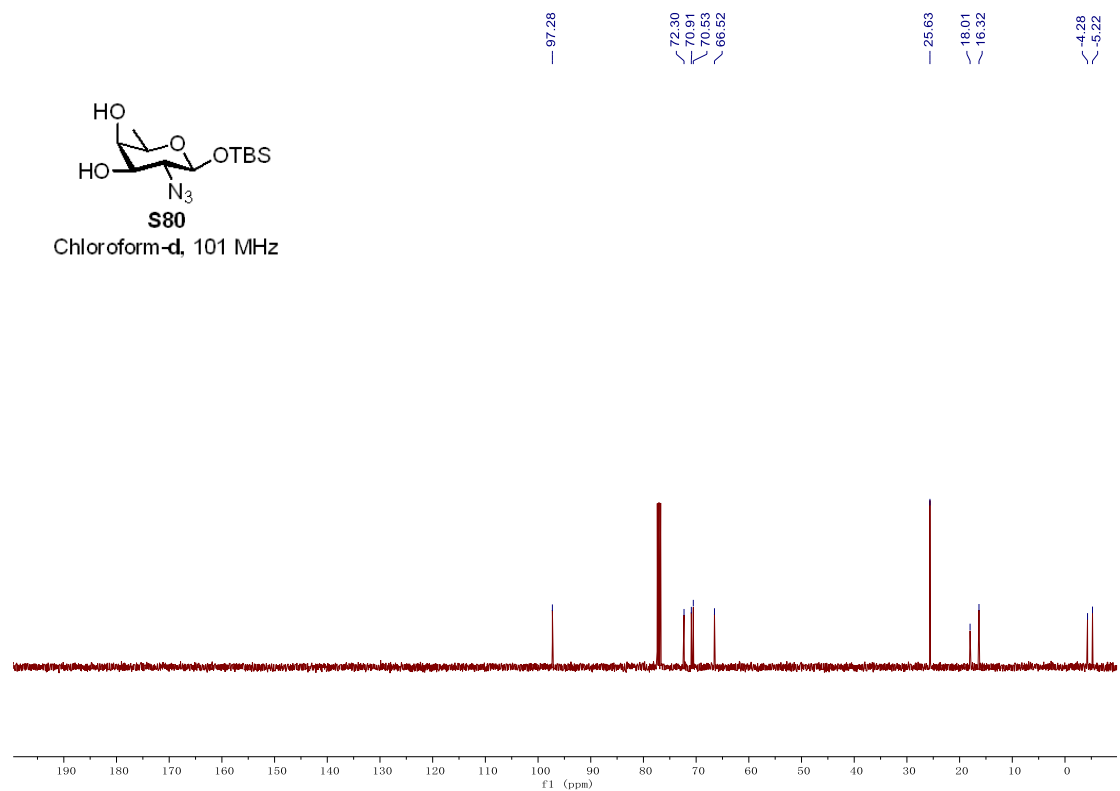

### <sup>13</sup>C NMR Spectra of compound S80

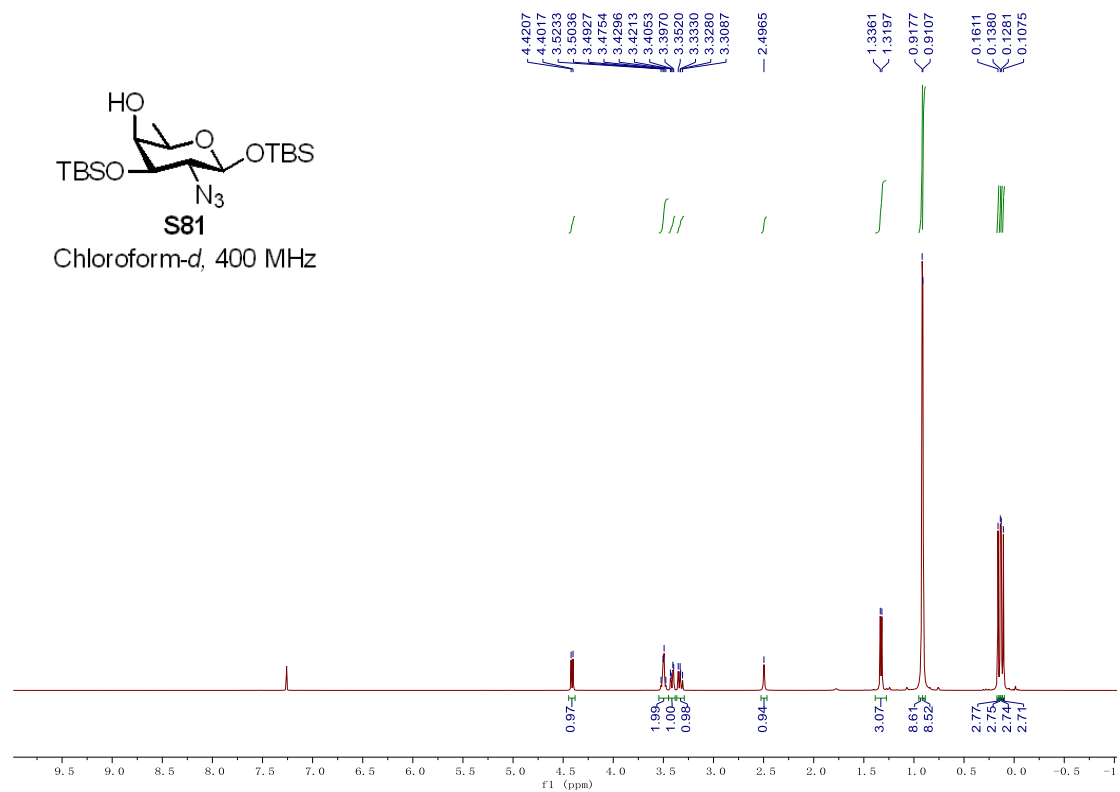

### <sup>1</sup>H NMR Spectra of compound S81

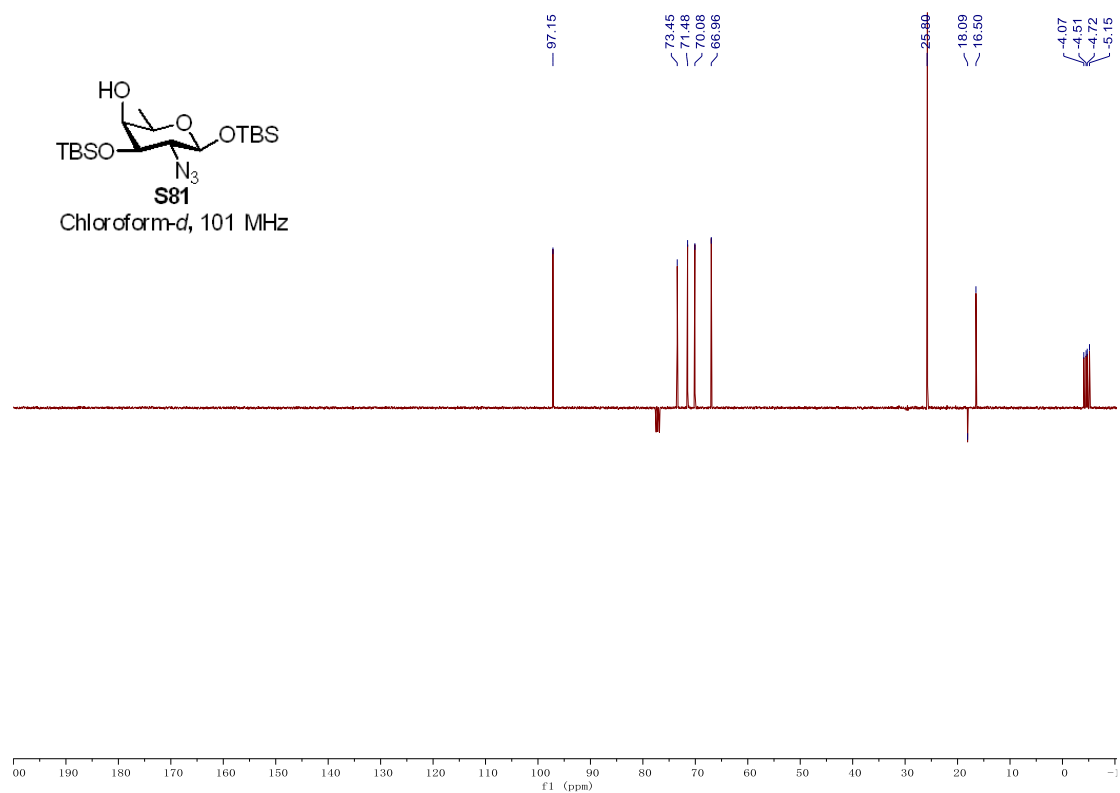

### <sup>13</sup>C NMR Spectra of compound S81

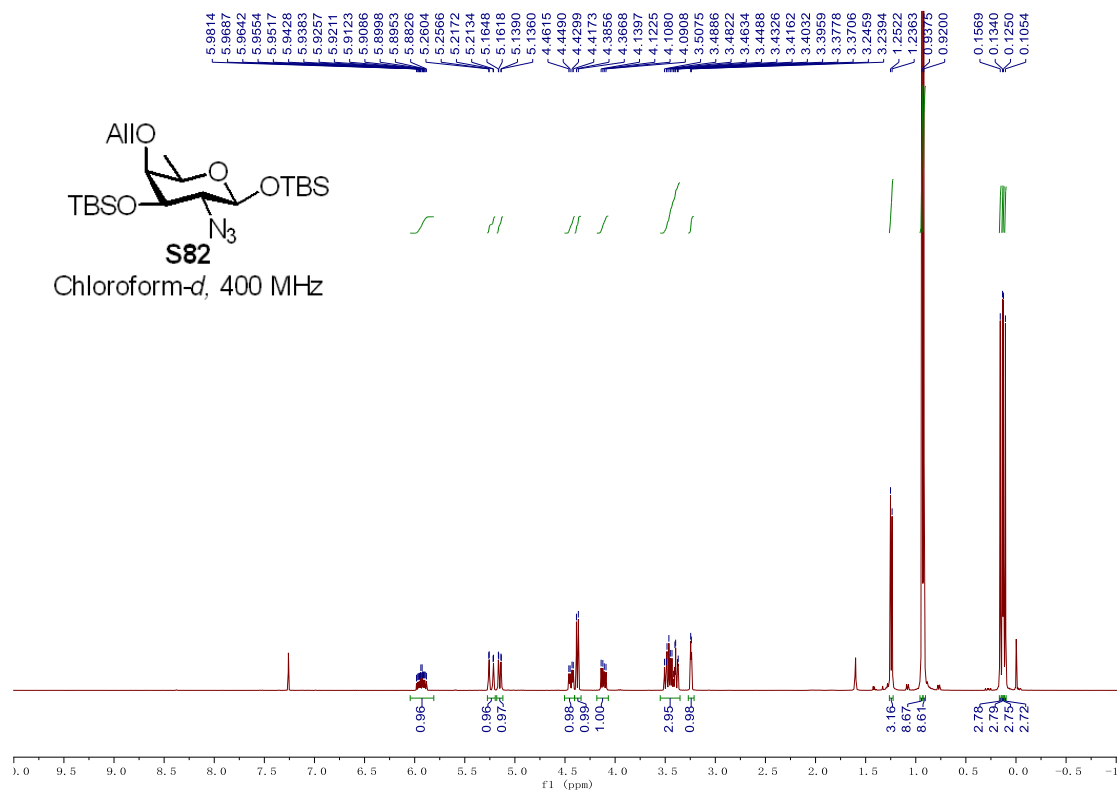

### <sup>1</sup>H NMR Spectra of compound S82

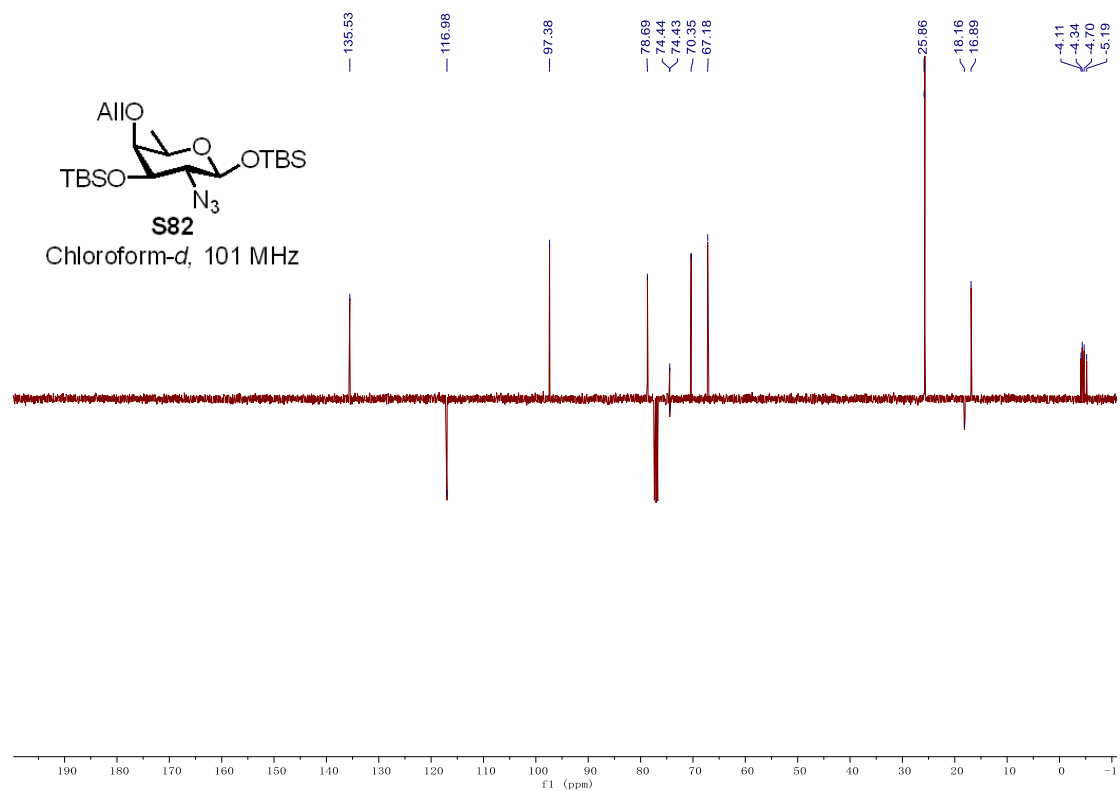

### <sup>13</sup>C NMR Spectra of compound S82



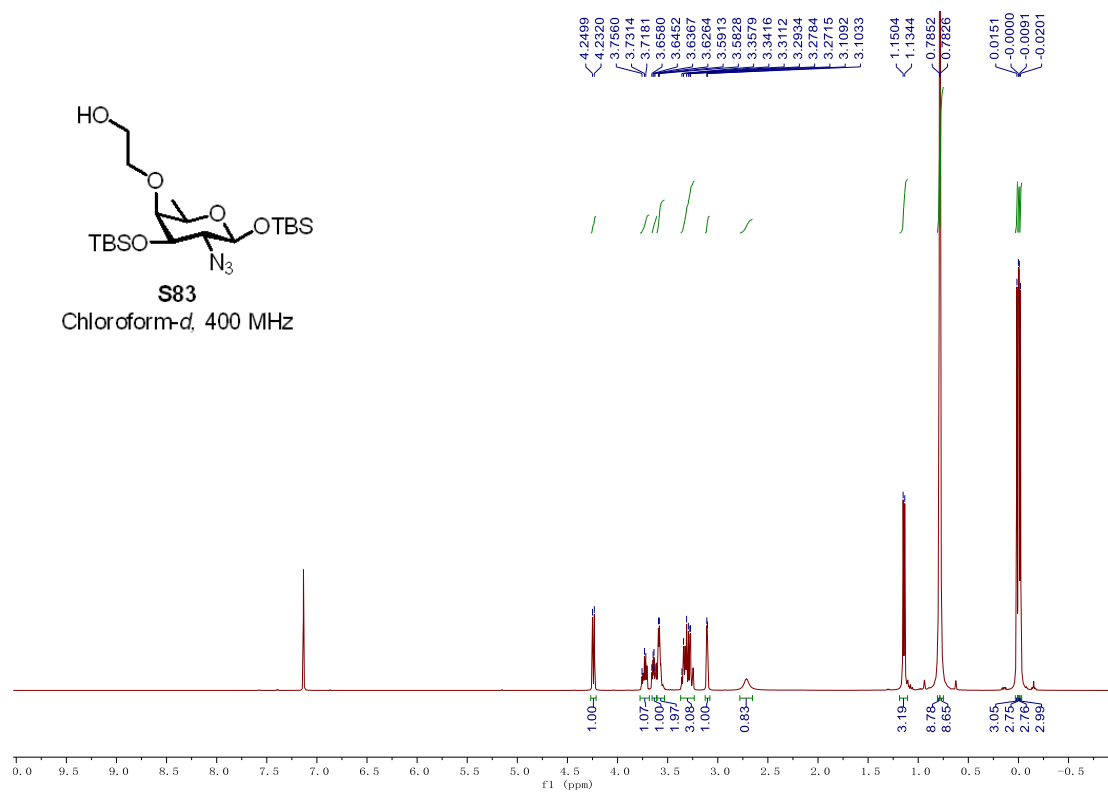

### <sup>1</sup>H NMR Spectra of compound S83

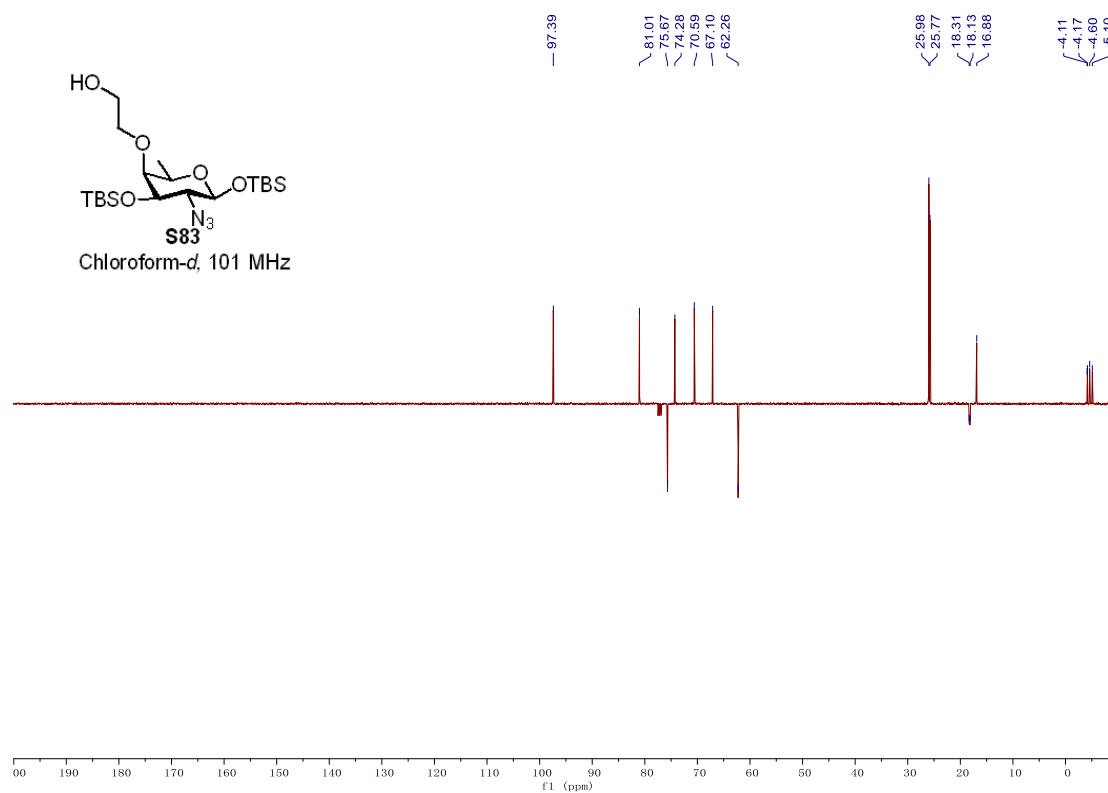

### <sup>13</sup>C NMR Spectra of compound S83

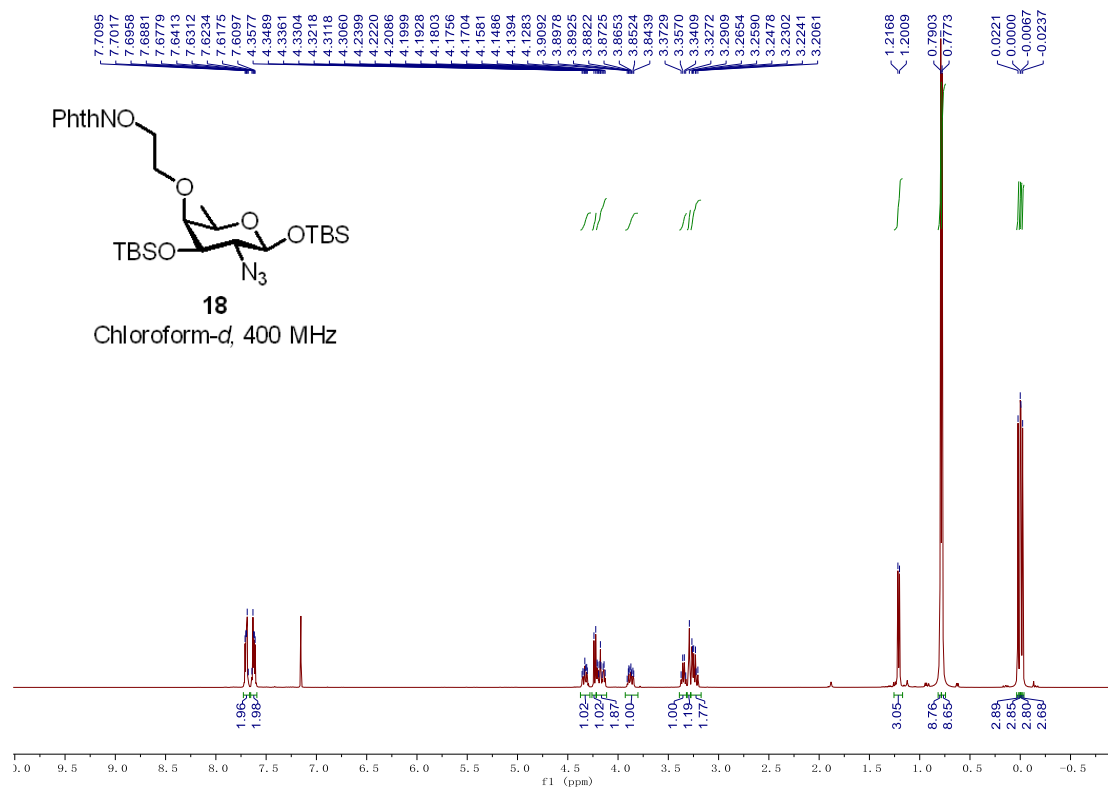

**<sup>1</sup>H NMR Spectra of compound 18**

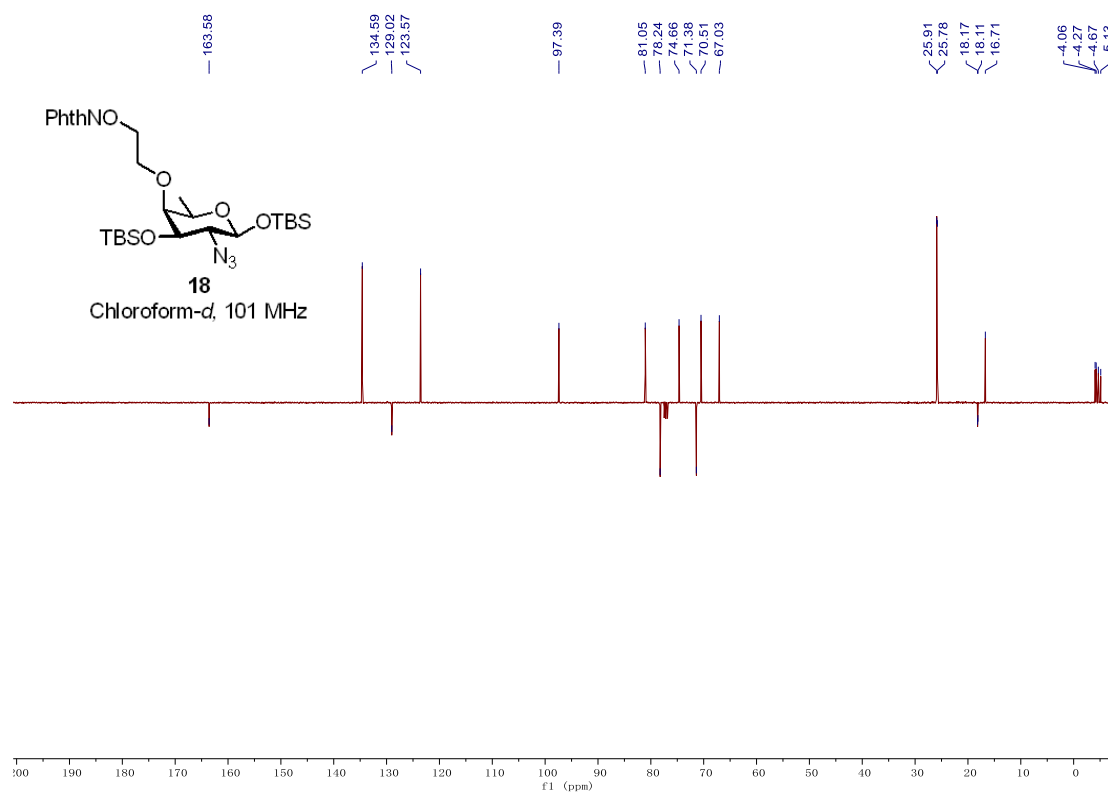

**<sup>13</sup>C NMR Spectra of compound 18**

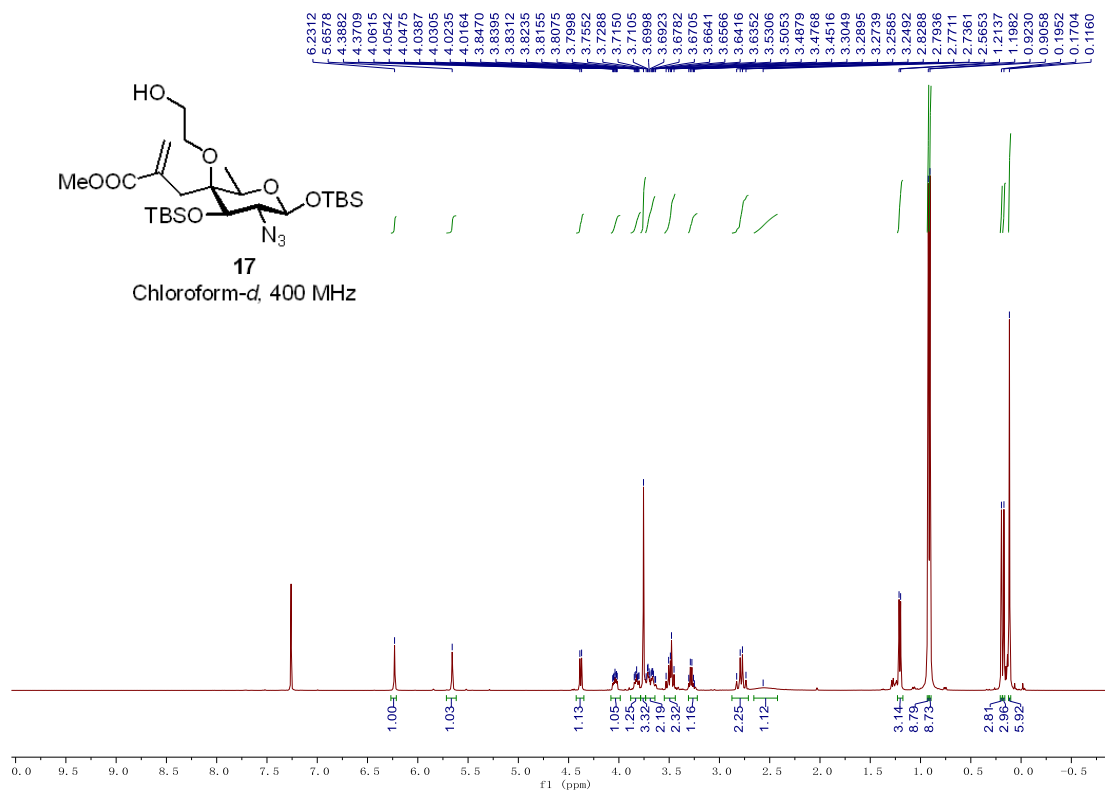

### <sup>1</sup>H NMR Spectra of compound 17

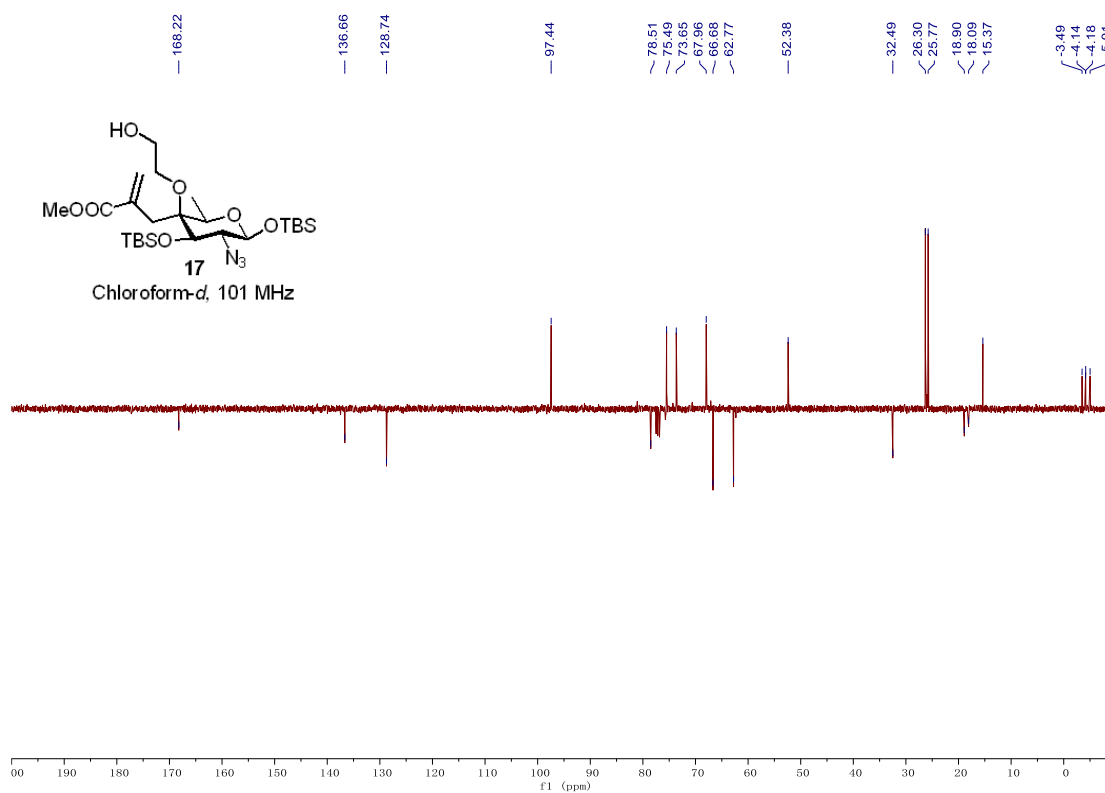

### <sup>13</sup>C NMR Spectra of compound 17

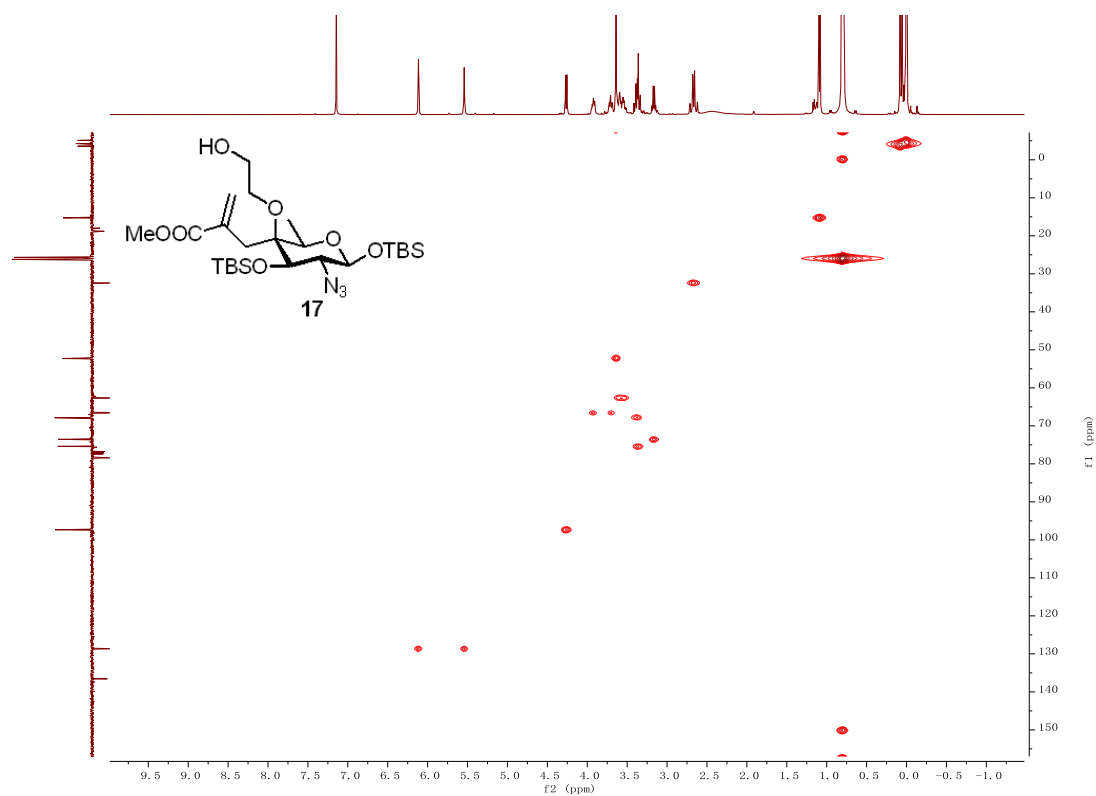

**HSQC NMR Spectra of compound 17**

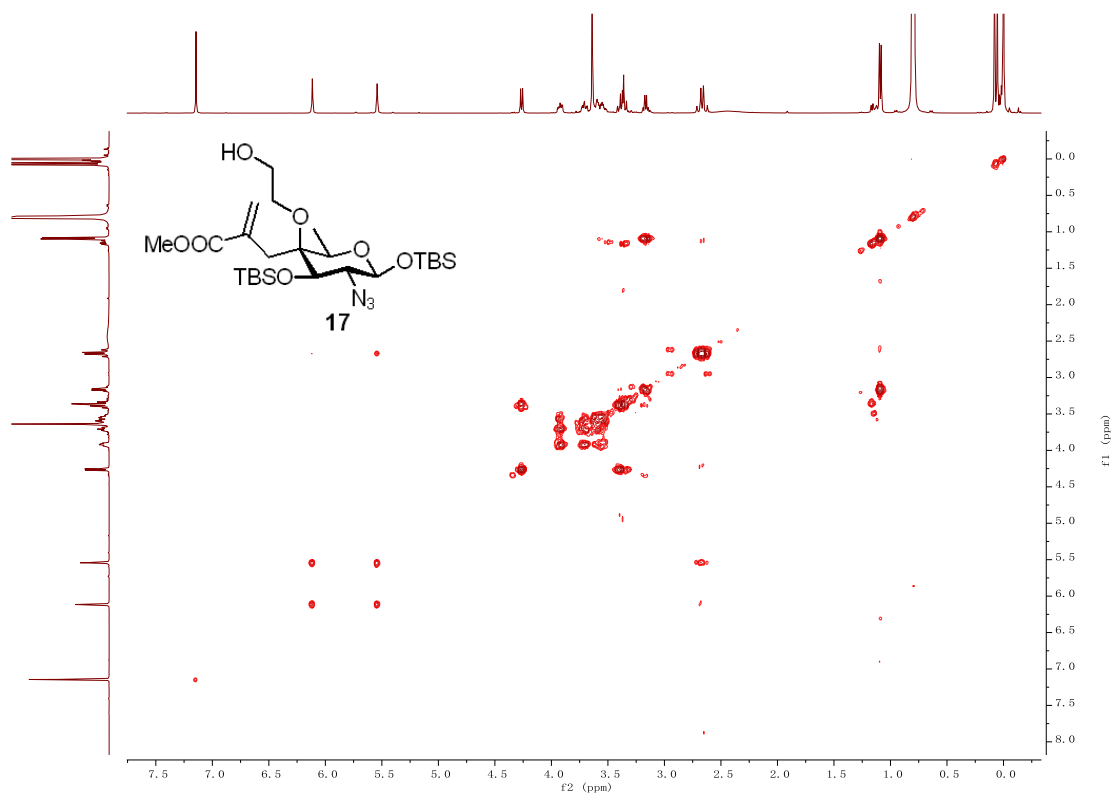

**COSY NMR Spectra of compound 17**

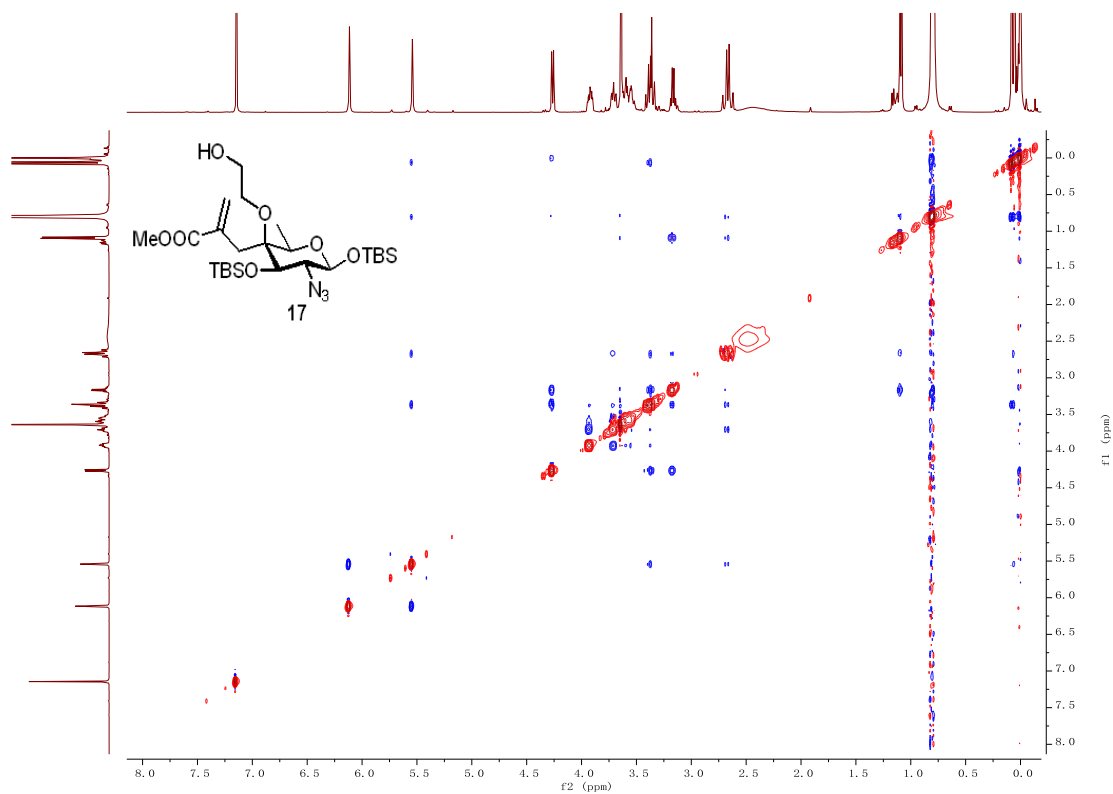

**NOESY NMR Spectra of compound 17**

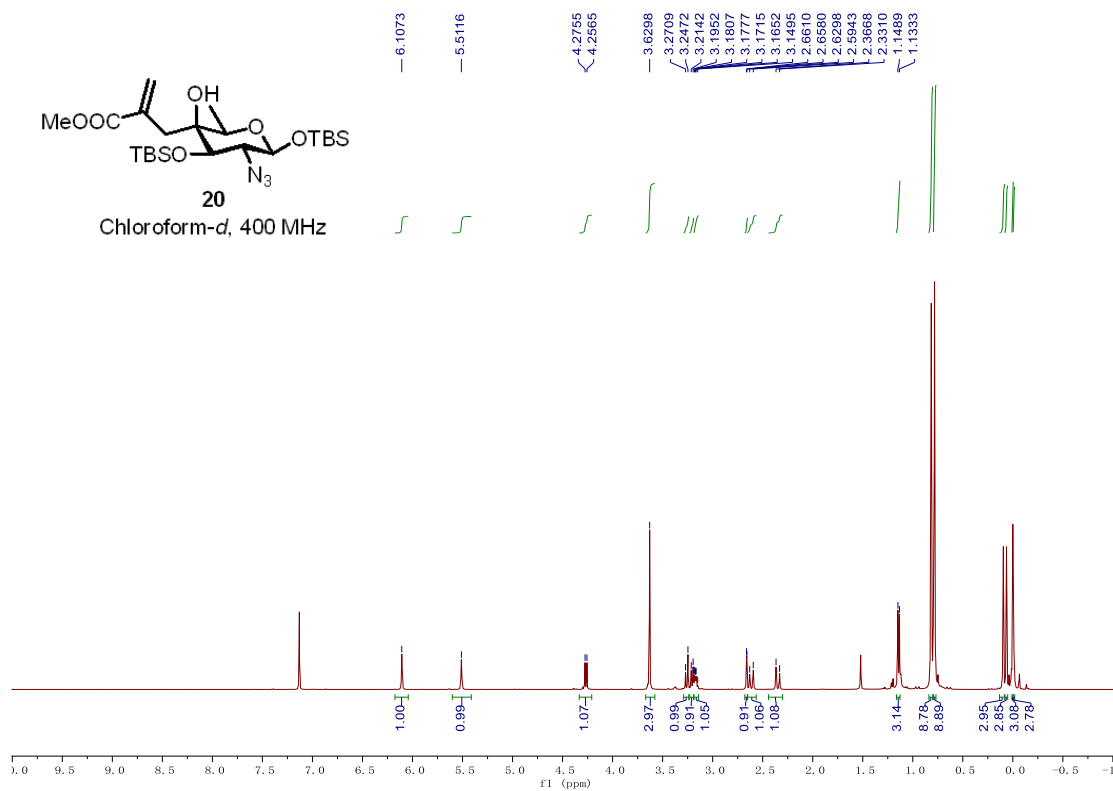

**<sup>1</sup>H NMR Spectra of compound 20**

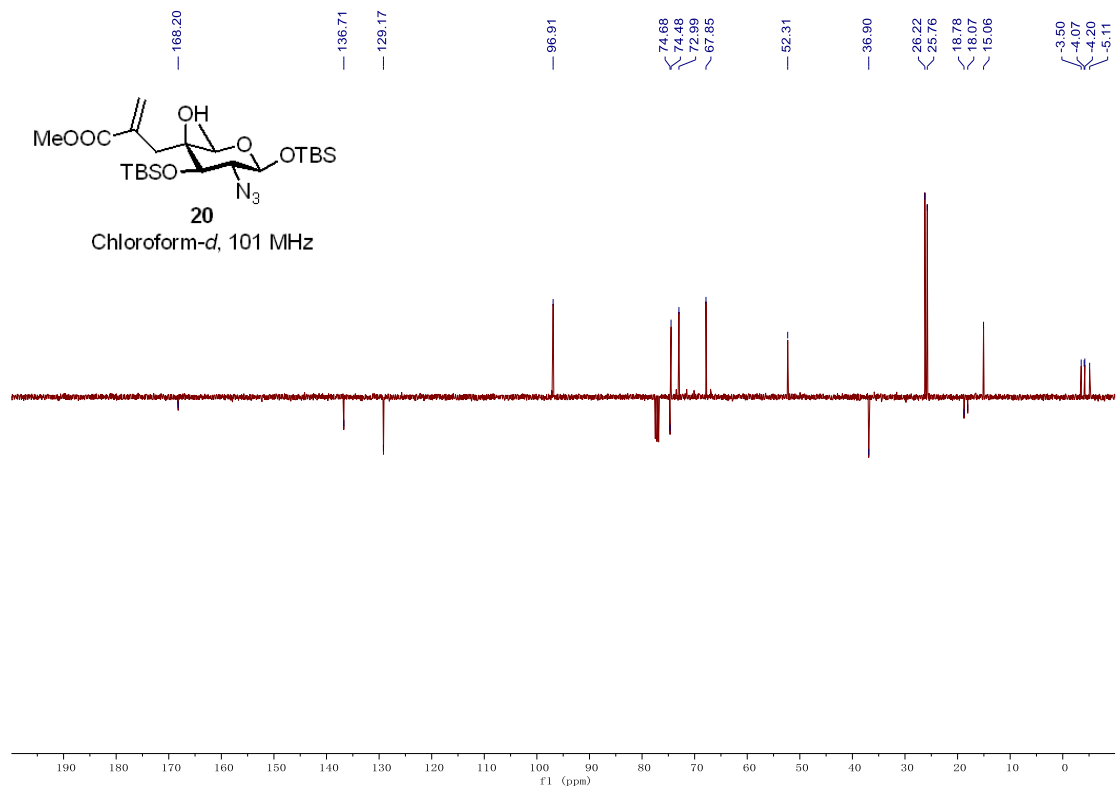

### <sup>13</sup>C NMR Spectra of compound 20

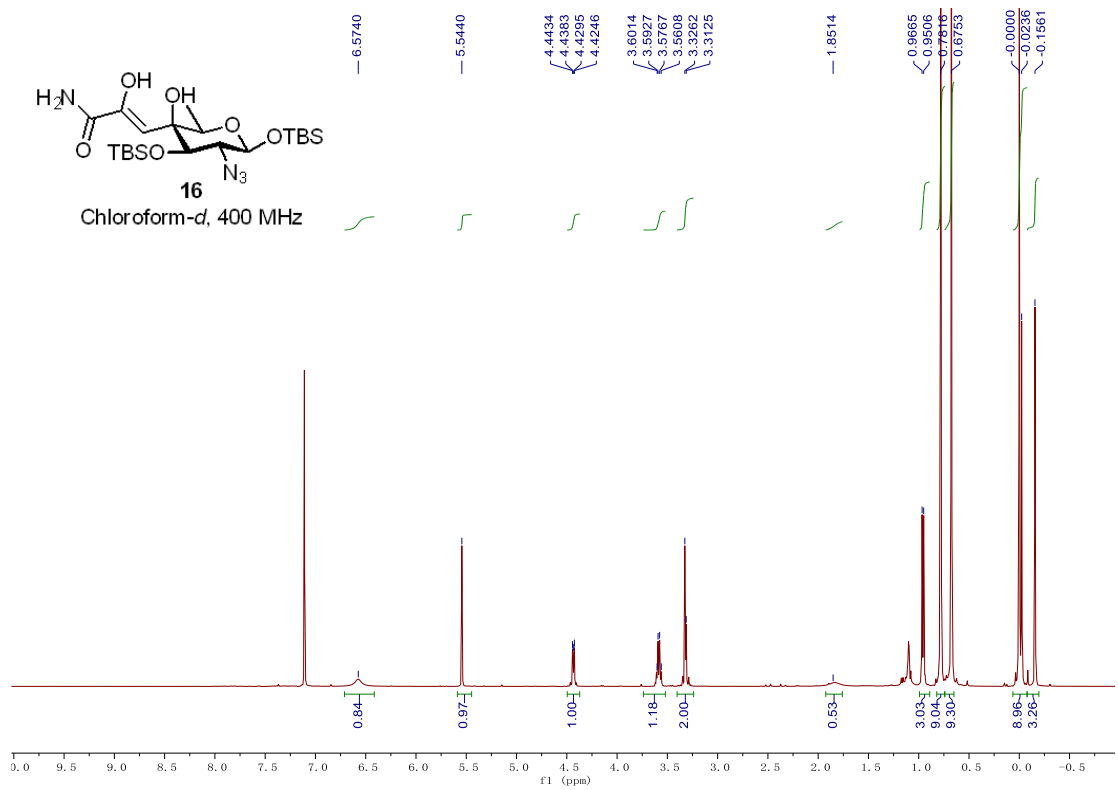

### <sup>1</sup>H NMR Spectra of compound 16

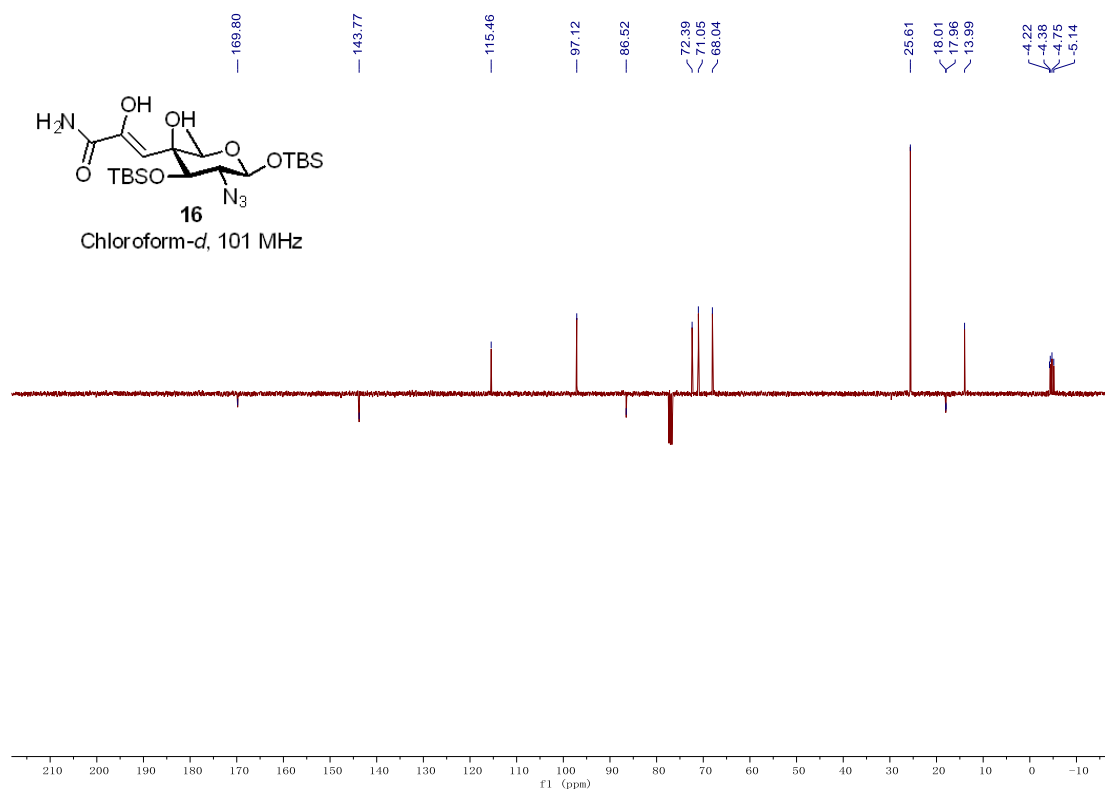

**$^{13}C$  NMR Spectra of compound 16**
